# Supplementary material for: Cross-Cohort Analysis Identifies a TEAD4–MYCN Positive Feedback Loop as the Core Regulatory Element of High-Risk Neuroblastoma
Source: Oxford University Press journal article supplement (doi:10.1158/2159-8290.cd-16-0861), 2018-03-06
Supplement: 21598290cd160861-sup-169577_3_supp_4574639_p49g29.xlsx [file 21598290cd160861-sup-169577_3_supp_4574639_p49g29.xlsx]

## Sheet: TARGET dataset
Sample ID	SUBTYPE	MYCN-status	Stage	Age
6258_0753	MES	0	4	2
6258_2350	MES	1	4	2
6258_2058	MES	1	4	2
6258_1062	MES	0	4	2
6258_0982	MES	0	4	2
6258_2581	MES	1	4	2
6258_1129	MES	1	4	2
6258_6034	MES	0	4	2
6258_0483	MES	0	4	2
6258_2023	MES	0	4	2
6258_2765	MES	0	4	2
6258_3753	MES	1	4	2
6258_2498	MES	NA	4	2
6258_3869	MES	0	4	2
6258_0839	MES	0	4	2
6258_1360	MES	0	4	2
6258_1159	MES	0	4	2
6258_1587	MES	0	4	2
6258_2480	MES	0	4	2
6258_2622	MES	0	4	2
6258_2122	MES	0	4	2
6258_2890	MES	0	4	2
6258_1265	MES	1	4	2
6258_1382	MES	0	4	2
6258_1953	MES	0	4	2
6258_2559	MES	0	4	2
6258_6447	MES	1	4	2
6258_6168	MES	1	4	2
6258_0883	MES	1	4	2
6258_1849	MES	0	4	2
6258_1220	MES	0	4	2
6258_2680	MES	0	4	2
6258_0715	MES	0	4	2
6258_0355	MES	0	4	2
6258_2464	MES	0	4	2
6258_1691	MES	0	4	2
6258_2243	MES	0	4	2
6258_2612	MES	0	4	2
6258_2587	MES	0	4	2
6258_3160	MES	0	4	2
6258_2137	MES	1	4	2
6258_0633	MES	0	4	2
6258_1003	MES	0	4	2
6258_3671	MES	0	4	2
6258_3687	MES	0	4	2
6258_6449	MES	0	4	2
6258_2576	MES	1	4	2
6258_2597	MES	0	4	2
6258_2950	MES	0	4	2
6258_7017	MES	0	4	2
6258_6404	MES	0	4	2
6258_2952	MES	0	4	2
6258_2003	MES	0	4	2
6258_0495	MES	0	4	2
6258_2592	MES	1	4	2
6258_3440	MES	0	4	2
6258_0574	MES	0	4	2
6258_6392	MES	0	4	2
6258_0864	MES	0	4	2
6258_6154	MES	NA	4	2
6258_2050	MES	0	4	2
6258_3697	MES	0	4	2
6258_2788	MES	NA	4	2
6258_2361	MES	0	4	2
6258_2557	MES	0	4	2
6258_1287	MES	1	4	2
6258_2966	MES	1	4	2
6258_2656	MES	0	4	2
6258_1199	MES	0	4	2
6258_1891	MES	0	4	2
6258_7018	MES	1	4	2
6258_3204	MES	0	4	2
6258_6045	MES	0	4	2
6258_0009	MES	0	4	2
6258_2575	MES	0	4	2
6258_0713	11q-LOH	0	4	2
6258_0714	11q-LOH	0	4	2
6258_0730	11q-LOH	0	4	2
6258_0748	11q-LOH	0	4	2
6258_0767	11q-LOH	0	4	2
6258_0929	11q-LOH	0	4	2
6258_1042	11q-LOH	0	4	2
6258_1100	11q-LOH	0	4	2
6258_1683	11q-LOH	1	4	2
6258_1732	11q-LOH	0	4	2
6258_1938	11q-LOH	0	4	2
6258_2142	11q-LOH	0	4	2
6258_2174	11q-LOH	1	4	2
6258_2199	11q-LOH	0	4	2
6258_2550	11q-LOH	0	4	2
6258_2555	11q-LOH	0	4	2
6258_2572	11q-LOH	0	4	2
6258_2573	11q-LOH	0	4	2
6258_2574	11q-LOH	0	4	2
6258_2579	11q-LOH	0	4	2
6258_2580	11q-LOH	0	4	2
6258_2591	11q-LOH	0	4	2
6258_2595	11q-LOH	0	4	2
6258_2596	11q-LOH	0	4	2
6258_2604	11q-LOH	0	4	2
6258_2605	11q-LOH	0	4	2
6258_2615	11q-LOH	0	4	2
6258_2616	11q-LOH	0	4	2
6258_2618	11q-LOH	0	4	2
6258_2826	11q-LOH	0	4	2
6258_2970	11q-LOH	0	4	2
6258_3186	11q-LOH	0	4	2
6258_6166	11q-LOH	0	4	2
6258_6330	11q-LOH	0	4	2
6258_6337	11q-LOH	0	4	2
6258_6338	11q-LOH	0	4	2
6258_6394	11q-LOH	0	4	2
6258_6448	11q-LOH	0	4	2
6258_6450	11q-LOH	0	4	2
6258_7016	11q-LOH	0	4	2
6258_7027	11q-LOH	0	4	2
6258_0198	11q-LOH	0	4	2
6258_0593	11q-LOH	0	4	2
6258_0605	11q-LOH	0	4	2
6258_0718	11q-LOH	0	4	2
6258_0736	11q-LOH	0	4	2
6258_0877	11q-LOH	0	4	2
6258_0905	11q-LOH	0	4	2
6258_1092	11q-LOH	0	4	2
6258_1181	11q-LOH	0	4	2
6258_1204	11q-LOH	0	4	2
6258_1213	11q-LOH	0	4	2
6258_1272	11q-LOH	0	4	2
6258_1353	11q-LOH	0	4	2
6258_1378	11q-LOH	0	4	2
6258_1562	11q-LOH	0	4	2
6258_1577	11q-LOH	0	4	2
6258_1718	11q-LOH	0	4	2
6258_1931	11q-LOH	0	4	2
6258_2173	11q-LOH	0	4	2
6258_2548	11q-LOH	0	4	2
6258_2552	11q-LOH	0	4	2
6258_2556	11q-LOH	NA	4	2
6258_2584	11q-LOH	0	4	2
6258_2585	11q-LOH	0	4	2
6258_2589	11q-LOH	0	4	2
6258_2593	11q-LOH	0	4	2
6258_2607	11q-LOH	0	4	2
6258_2638	11q-LOH	0	4	2
6258_2815	11q-LOH	0	4	2
6258_2961	11q-LOH	0	4	2
6258_6015	11q-LOH	0	4	2
6258_7014	11q-LOH	0	4	2
6258_7019	11q-LOH	1	4	1
6258_7021	11q-LOH	1	4	2
6258_7022	11q-LOH	0	4	2
6258_7023	11q-LOH	0	4	2
6258_2354	11q-LOH	0	4	2
6258_2430	11q-LOH	0	4	2
6258_0702	MYCNA	0	4	2
6258_0773	MYCNA	1	4	2
6258_1669	MYCNA	0	4	2
6258_2551	MYCNA	0	4	2
6258_2617	MYCNA	0	4	2
6258_0060	MYCNA	0	4	2
6258_0160	MYCNA	1	4	2
6258_0237	MYCNA	1	4	2
6258_0419	MYCNA	1	4	2
6258_0493	MYCNA	1	4	2
6258_0583	MYCNA	1	4	2
6258_0584	MYCNA	1	4	2
6258_0610	MYCNA	0	4	2
6258_0719	MYCNA	0	4	2
6258_0742	MYCNA	1	4	2
6258_0807	MYCNA	1	4	1
6258_0875	MYCNA	1	4	2
6258_0942	MYCNA	1	4	2
6258_1009	MYCNA	1	4	2
6258_1243	MYCNA	1	4	2
6258_1266	MYCNA	1	4	2
6258_1375	MYCNA	1	4	2
6258_1595	MYCNA	1	4	2
6258_1613	MYCNA	1	4	2
6258_1881	MYCNA	1	4	2
6258_1964	MYCNA	1	4	2
6258_1972	MYCNA	0	4	2
6258_1977	MYCNA	0	4	2
6258_2005	MYCNA	1	4	2
6258_2169	MYCNA	1	4	2
6258_2175	MYCNA	1	4	2
6258_2207	MYCNA	1	4	2
6258_2353	MYCNA	1	4	2
6258_2569	MYCNA	0	4	2
6258_2577	MYCNA	1	4	2
6258_2582	MYCNA	1	4	2
6258_2594	MYCNA	1	4	2
6258_2601	MYCNA	1	4	2
6258_2613	MYCNA	1	4	2
6258_2614	MYCNA	0	4	2
6258_2663	MYCNA	1	4	2
6258_2668	MYCNA	1	4	2
6258_2698	MYCNA	1	4	2
6258_2827	MYCNA	1	4	2
6258_2870	MYCNA	1	4	2
6258_2896	MYCNA	1	4	2
6258_2937	MYCNA	1	4	2
6258_2948	MYCNA	1	4	2
6258_2951	MYCNA	1	4	2
6258_2955	MYCNA	1	4	2
6258_2968	MYCNA	1	4	2
6258_3023	MYCNA	1	4	2
6258_3382	MYCNA	1	4	2
6258_3881	MYCNA	1	4	2
6258_6220	MYCNA	0	4	2
6258_6393	MYCNA	1	4	2
6258_7015	MYCNA	0	4	2
6258_7020	MYCNA	1	4	2
6258_7025	MYCNA	1	4	2
6258_7026	MYCNA	1	4	1
6258_0047	Stage 1	0	1	0
6258_0200	Stage 1	0	1	0
6258_0238	Stage 1	0	1	0
6258_0348	Stage 1	0	1	0
6258_0525	Stage 1	0	1	0
6258_0543	Stage 1	0	1	0
6258_0558	Stage 1	0	1	0
6258_0979	Stage 1	0	1	0
6258_0989	Stage 1	0	1	0
6258_1002	Stage 1	0	1	0
6258_1007	Stage 1	0	1	0
6258_1030	Stage 1	0	1	0
6258_1033	Stage 1	0	1	0
6258_1061	Stage 1	0	1	0
6258_1073	Stage 1	0	1	0
6258_1124	Stage 1	0	1	0
6258_1165	Stage 1	0	1	0
6258_1170	Stage 1	0	1	0
6258_1224	Stage 1	0	1	0
6258_1226	Stage 1	0	1	0
6258_1254	Stage 1	0	1	0
6258_1256	Stage 1	0	1	0
6258_1350	Stage 1	0	1	0
6258_1492	Stage 1	0	1	0

## Sheet: NRC dataset
Sample ID	SUBTYPE	MYCN-status	Stage	Age
nrc0006	MES	0	4	2
nrc2013	MES	0	4	2
nrc4064	MES	0	4	2
nrc8155	MES	0	4	2
nrc8203	MES	0	4	2
nrc8204	MES	0	4	2
nrc2015	MES	1	4	2
nrc2021	MES	1	4	2
nrc2031	MES	1	4	1
nrc2169	MES	0	4	2
nrc2194	MES	0	4	2
nrc2198	MES	1	4	1
nrc2383	MES	1	4	2
nrc2391	MES	0	4	2
nrc4041	MES	0	4	2
nrc6102	MES	1	4	2
nrc8172	MES	0	4	2
nrc8180	MES	1	4	1
nrc8189	MES	0	4	2
nrc8209	MES	0	4	2
nrc8219	MES	1	4	1
nrc2119	11q-LOH	0	4	2
nrc8152	11q-LOH	0	4	2
nrc2022	11q-LOH	1	4	2
nrc2130	11q-LOH	0	4	2
nrc2184	11q-LOH	0	4	2
nrc2387	11q-LOH	1	4	2
nrc2542	11q-LOH	0	4	2
nrc2555	11q-LOH	0	4	2
nrc4017	11q-LOH	0	4	2
nrc4020	11q-LOH	0	4	2
nrc6067	11q-LOH	0	4	2
nrc8206	11q-LOH	0	4	2
nrc2017	11q-LOH	0	4	2
nrc2018	11q-LOH	0	4	2
nrc2024	11q-LOH	0	4	2
nrc2036	11q-LOH	0	4	2
nrc2101	11q-LOH	0	4	2
nrc2148	11q-LOH	0	4	2
nrc2195	11q-LOH	0	4	2
nrc2221	11q-LOH	0	4	2
nrc2284	11q-LOH	0	4	2
nrc2385	11q-LOH	0	4	2
nrc2550	11q-LOH	0	4	2
nrc2558	11q-LOH	0	4	2
nrc4011	11q-LOH	0	4	2
nrc4016	11q-LOH	0	4	2
nrc4038	11q-LOH	1	4	2
nrc4045	11q-LOH	0	4	2
nrc4055	11q-LOH	0	4	2
nrc4056	11q-LOH	0	4	2
nrc4061	11q-LOH	0	4	2
nrc4063	11q-LOH	0	4	2
nrc4082	11q-LOH	1	4	2
nrc4092	11q-LOH	0	4	2
nrc4094	11q-LOH	0	4	2
nrc4095	11q-LOH	0	4	2
nrc4107	11q-LOH	0	4	2
nrc4108	11q-LOH	0	4	2
nrc6072	11q-LOH	1	4	2
nrc6084	11q-LOH	0	4	2
nrc8181	11q-LOH	0	4	2
nrc8183	11q-LOH	0	4	2
nrc8191	11q-LOH	0	4	1
nrc8192	11q-LOH	0	4	2
nrc8212	11q-LOH	0	4	2
nrc8217	11q-LOH	0	4	2
nrc8218	11q-LOH	0	4	2
nrc0004	MYCNA	1	4	1
nrc2020	MYCNA	1	4	2
nrc2025	MYCNA	1	4	2
nrc2026	MYCNA	1	4	2
nrc2056	MYCNA	1	4	2
nrc2057	MYCNA	0	4	2
nrc2107	MYCNA	0	4	2
nrc2174	MYCNA	1	4	2
nrc2189	MYCNA	1	4	2
nrc2219	MYCNA	1	4	2
nrc2390	MYCNA	1	4	2
nrc2537	MYCNA	1	4	2
nrc2557	MYCNA	1	4	2
nrc4015	MYCNA	1	4	2
nrc4018	MYCNA	1	4	2
nrc4032	MYCNA	1	4	2
nrc4039	MYCNA	1	4	2
nrc4046	MYCNA	1	4	2
nrc4054	MYCNA	0	4	2
nrc4062	MYCNA	0	4	2
nrc4066	MYCNA	1	4	1
nrc4078	MYCNA	1	4	2
nrc4093	MYCNA	1	4	2
nrc4106	MYCNA	1	4	2
nrc6062	MYCNA	0	4	2
nrc8135	MYCNA	1	4	2
nrc8173	MYCNA	1	4	2
nrc8175	MYCNA	1	4	1
nrc8210	MYCNA	1	4	2
nrc0010	Stage 1	NA	1	0
nrc2105	Stage 1	0	1	0
nrc2144	Stage 1	0	1	0
nrc2181	Stage 1	0	1	0
nrc2193	Stage 1	0	1	0
nrc2217	Stage 1	0	1	0
nrc2541	Stage 1	0	1	0
nrc2546	Stage 1	0	1	0
nrc4001	Stage 1	0	1	0
nrc4006	Stage 1	0	1	0
nrc4007	Stage 1	0	1	0
nrc4012	Stage 1	0	1	0
nrc4025	Stage 1	0	1	0
nrc4026	Stage 1	0	1	0
nrc4028	Stage 1	0	1	0
nrc4031	Stage 1	0	1	0
nrc4091	Stage 1	0	1	0
nrc4096	Stage 1	0	1	0
nrc4098	Stage 1	0	1	0
nrc4099	Stage 1	0	1	0
nrc4100	Stage 1	0	1	0
nrc4101	Stage 1	0	1	0
nrc4102	Stage 1	0	1	0
nrc4103	Stage 1	0	1	0
nrc6074	Stage 1	0	1	0
nrc6081	Stage 1	0	1	0
nrc6082	Stage 1	0	1	0
nrc6085	Stage 1	0	1	0
nrc6088	Stage 1	0	1	0
nrc6104	Stage 1	0	1	0
