# Supplementary material for: Cross-Cohort Analysis Identifies a TEAD4–MYCN Positive Feedback Loop as the Core Regulatory Element of High-Risk Neuroblastoma
Source: Oxford University Press journal article supplement (doi:10.1158/2159-8290.cd-16-0861), 2018-03-06
Supplement: 21598290cd160861-sup-169577_3_supp_4574640_p49g29.xlsx [file 21598290cd160861-sup-169577_3_supp_4574640_p49g29.xlsx]

## Sheet: subtype DGE signatures
Symbol	MESENCHYMAL vs. STAGE 1				11q-LOH vs STAGE 1				MYCNA vs STAGE 1
	TARGET		NRC		TARGET		NRC		TARGET		NRC
	t-stat	p-value	t-stat	p-value	t-stat	p-value	t-stat	p-value	t-stat	p-value	t-stat	p-value
A1BG	1.28012	0.203554	1.17359	0.246234	2.08639	0.0394624	2.8192	0.00615426	1.73644	0.0862423	3.40436	0.00122023
A1CF	0.109496	0.913035	0.256204	0.798866	1.3401	0.183219	0.656056	0.513796	1.63455	0.105976	-0.44341	0.659148
A2LD1	0.557763	0.578291	0.412002	0.682134	-0.604108	0.547126	-0.0838962	0.933363	-0.122694	0.90265	0.355374	0.723621
A2M	4.34353	3.4503e-05	4.30156	8.06719e-05	-0.189514	0.85007	-1.56913	0.120828	-3.67954	0.000416726	-3.11909	0.00284412
A2ML1	-0.624121	0.534013	1.12986	0.264036	0.446729	0.656027	1.06147	0.291885	1.57303	0.119563	-0.399656	0.690904
A4GALT	1.20367	0.231648	2.47772	0.016718	-1.96186	0.0525308	0.417541	0.677476	-3.4873	0.000787007	-0.74447	0.45965
A4GNT	0.433094	0.665908	-1.74969	0.0864317	0.480681	0.631783	-0.63499	0.527367	1.28062	0.203938	-1.37741	0.17377
AAA1	0.772788	0.441527	-1.28918	0.203388	2.15646	0.0334209	-0.294044	0.769537	1.52814	0.130327	-0.806945	0.423053
AAAS	-2.62344	0.0101109	-0.550873	0.584224	0.845234	0.399978	-0.618951	0.537824	2.30242	0.0238462	2.68343	0.00952137
AACS	-1.1723	0.24395	-0.186933	0.852485	3.82393	0.000227456	3.58101	0.000604994	3.00355	0.00353755	3.82994	0.000321435
AADAC	1.23595	0.219462	-0.334114	0.73972	1.09786	0.274878	-0.368134	0.71381	1.33958	0.184084	-1.17859	0.24346
AADACL2	-0.101859	0.919079	-0.728753	0.469622	-0.00698417	0.994441	-0.447566	0.655757	-0.589249	0.557314	-0.768433	0.445402
AADAT	-2.57662	0.0114843	-1.57323	0.122101	-3.19695	0.00185465	-3.33483	0.00132894	0.755787	0.451943	0.744202	0.459811
AAGAB	4.3477	3.39599e-05	0.864711	0.391411	5.27141	7.71084e-07	2.67004	0.00929416	1.84085	0.0692601	-0.797625	0.428398
AAK1	-1.39804	0.165289	-0.314742	0.754294	-4.16982	6.45304e-05	-2.05861	0.0430051	-6.77974	1.70965e-09	-3.24962	0.0019409
AAMP	-3.21922	0.00174883	-0.963167	0.340193	-1.58975	0.115016	-1.45518	0.149792	-1.55681	0.123366	-1.16447	0.249085
AANAT	1.4451	0.151653	-1.26312	0.212525	0.820726	0.413736	-0.749736	0.455759	1.56814	0.1207	0.00473896	0.996235
AARS	-0.535385	0.593609	-0.023901	0.981029	-0.611133	0.542485	0.229097	0.819417	-2.26873	0.0259121	-1.41662	0.162037
AARS2	-2.26312	0.0258575	0.0338973	0.973097	-0.831388	0.407716	0.482691	0.630721	1.97442	0.0516999	2.60021	0.0118448
AARSD1	-1.70762	0.0909063	-2.15735	0.0359096	2.56755	0.0117068	-1.41102	0.162373	1.32229	0.18975	-0.461519	0.646183
AASDH	1.25643	0.211979	0.329195	0.743411	2.41469	0.0175475	1.07444	0.286069	4.37047	3.60586e-05	2.36982	0.0212045
AASDHPPT	-3.96242	0.000141762	-2.57599	0.0130615	-3.437	0.000855381	-3.21008	0.0019542	0.527978	0.59894	0.488366	0.627164
AASS	3.68588	0.000375549	4.64479	2.58442e-05	-0.795169	0.42838	-0.529286	0.59817	-0.346468	0.729879	-0.137716	0.89095
AATF	1.05413	0.29444	2.37703	0.0214018	2.77056	0.00666171	2.21955	0.0294717	2.10136	0.0386796	1.90424	0.0619301
ABAT	2.47325	0.015128	1.52357	0.134044	2.08727	0.0393812	0.531124	0.596902	2.81416	0.00612071	0.75875	0.451128
ABCA1	3.8866	0.000185991	4.50434	4.13256e-05	0.651443	0.51624	0.840762	0.403154	-3.43161	0.000942438	-2.24783	0.0284727
ABCA10	0.444358	0.657773	1.10833	0.273128	-5.63146	1.61455e-07	-3.88682	0.000217504	-7.99616	7.11061e-12	-6.11067	9.46918e-08
ABCA11P	-3.72582	0.000327157	0.427537	0.670862	-5.15487	1.26487e-06	-2.39142	0.0192909	-0.812605	0.418798	0.860126	0.393323
ABCA12	2.23778	0.0275233	2.26651	0.0278707	0.576176	0.565778	-0.889708	0.376467	6.3192	1.2929e-08	5.90589	2.05024e-07
ABCA13	1.80156	0.0747207	-1.29254	0.202232	3.00715	0.00332804	0.726089	0.470044	2.82517	0.00593255	-0.551782	0.583255
ABCA2	-0.519903	0.604315	0.608363	0.545757	-1.7657	0.0804677	-0.538591	0.591764	-3.96733	0.000154871	-2.10177	0.0400043
ABCA3	-2.32939	0.0219126	-2.65197	0.0107517	-1.58498	0.116096	-0.632776	0.528805	-3.35284	0.00121229	-1.04929	0.298474
ABCA4	3.0048	0.00338211	0.811595	0.420949	4.21584	5.42934e-05	3.09181	0.00279268	3.38505	0.00109418	1.46241	0.149121
ABCA5	-2.90336	0.00457079	-2.66266	0.0104586	-4.16292	6.62155e-05	-2.70944	0.008347	-6.14082	2.79909e-08	-5.61588	6.06771e-07
ABCA6	1.99314	0.0490548	3.79352	0.00040868	-3.13685	0.00223775	-2.78401	0.0067918	-7.03402	5.51079e-10	-5.49136	9.63139e-07
ABCA7	0.574863	0.566715	-1.10989	0.272463	-0.63058	0.529739	-0.481704	0.631419	-2.70247	0.00836315	-2.63597	0.0107893
ABCA8	1.83098	0.0701736	2.93088	0.00512246	-2.07293	0.0407249	-2.87168	0.0053051	-5.91679	7.30837e-08	-3.36779	0.00136314
ABCA9	1.98873	0.0495487	3.98884	0.000221187	-3.56606	0.000555625	-2.64343	0.00998793	-7.40822	1.02556e-10	-4.71335	1.61165e-05
ABCB1	-0.291873	0.771007	-0.959783	0.341877	-3.44669	0.000828417	-3.43566	0.000966748	-2.18635	0.0316403	-1.12803	0.264035
ABCB10	-2.56705	0.011785	-0.293025	0.770741	-2.01487	0.0465762	-0.222477	0.824547	-0.668835	0.505479	0.319026	0.750873
ABCB11	-0.746247	0.457323	-1.97601	0.0537986	-0.299426	0.76523	-1.64215	0.104746	0.34497	0.731	-1.95855	0.0550649
ABCB4	-0.099764	0.920738	0.580573	0.564189	-1.98992	0.0493027	-0.638919	0.524822	-2.03535	0.045045	-3.39727	0.0012468
ABCB5	1.41239	0.161036	1.60398	0.115145	1.12556	0.263018	1.05893	0.293031	0.839077	0.403866	1.51295	0.135818
ABCB6	-0.889738	0.375808	0.826365	0.412603	-2.48694	0.0145232	-0.301551	0.763829	1.56882	0.12054	4.42355	4.42719e-05
ABCB7	0.664385	0.50802	1.67795	0.0997254	2.86309	0.00510198	2.49465	0.0148087	4.09395	9.88313e-05	2.50418	0.0151596
ABCB8	-2.1632	0.0329832	-1.39297	0.169916	-0.804875	0.422782	1.01536	0.3132	-5.24781	1.18366e-06	-2.18837	0.0327554
ABCB9	-5.3103	6.94826e-07	-3.79799	0.000403032	-2.07769	0.0402746	-1.82309	0.0722754	-4.7967	7.12445e-06	-1.86891	0.0667767
ABCC1	1.71259	0.0899832	4.03744	0.000189476	1.97964	0.0504657	2.97793	0.00390694	4.93715	4.1075e-06	6.75599	8.10618e-09
ABCC10	-4.63585	1.10882e-05	-2.86804	0.00607567	-5.31664	6.35342e-07	-2.06721	0.042165	-6.93391	8.61536e-10	-3.63212	0.000603601
ABCC11	1.58896	0.115323	-0.8278	0.411797	2.39154	0.0186287	2.7631	0.00719859	2.99826	0.00359326	1.35315	0.181351
ABCC12	0.640295	0.52349	-1.87576	0.0666523	1.93583	0.0556841	0.700911	0.485528	2.27232	0.0256851	0.526566	0.600539
ABCC13	0.664654	0.507849	-1.52732	0.133112	1.09698	0.275258	-0.0147258	0.98829	1.95763	0.0536753	-0.200532	0.841778
ABCC2	2.02795	0.0453076	0.841219	0.404312	2.64936	0.00936093	1.69614	0.0940064	3.45984	0.00086034	2.49237	0.0156204
ABCC3	-0.0877958	0.93022	0.390727	0.697692	-1.99121	0.0491583	-1.31221	0.193451	-3.6013	0.000541162	-3.52642	0.00083929
ABCC4	3.57345	0.000550837	6.06899	1.83217e-07	0.171305	0.864326	1.44477	0.152688	6.1055	3.25888e-08	11.936	3.8757e-17
ABCC5	-1.17359	0.243435	0.306464	0.76055	-2.87496	0.00492819	-0.892575	0.37494	-1.95937	0.0534671	1.40429	0.165657
ABCC6	1.72169	0.0883125	-0.623718	0.535706	3.10327	0.00248268	2.30798	0.0237594	3.12322	0.00247214	1.74846	0.0857676
ABCC8	2.23176	0.0279326	1.84918	0.0704693	-0.45104	0.652927	0.644829	0.521005	1.35	0.180729	3.43266	0.0011195
ABCC9	2.3381	0.0214357	4.3476	6.93728e-05	-2.12177	0.0363036	-2.2448	0.0277289	-3.63367	0.000485919	-2.46048	0.0169288
ABCD1	0.134855	0.893006	-0.305951	0.760938	0.121934	0.903193	1.05702	0.293897	-2.74115	0.00751339	-2.23481	0.0293655
ABCD2	-0.738544	0.461967	0.140574	0.888783	-1.62501	0.107278	-1.13224	0.261141	0.642094	0.522603	0.0528532	0.958034
ABCD3	-1.2086	0.229756	0.00069118	0.999451	-1.07202	0.286264	-1.00695	0.317195	-1.27826	0.204763	-0.0844111	0.933025
ABCD4	-0.62485	0.533536	1.96212	0.0554414	0.813945	0.417591	2.51801	0.0139345	-0.636381	0.5263	0.931377	0.355587
ABCE1	2.71718	0.00779833	2.89098	0.00571003	3.32729	0.00122405	1.9373	0.0564741	6.37291	1.02323e-08	5.54114	8.0095e-07
ABCF1	0.776926	0.439093	0.967649	0.337972	2.77931	0.00649739	1.36163	0.177391	2.15085	0.0344314	1.49927	0.139323
ABCF2	1.66636	0.0988681	2.52685	0.0147874	3.57187	0.000544805	3.72853	0.000371584	2.44542	0.0166095	2.91754	0.00504033
ABCF3	0.827513	0.409978	-0.55667	0.580286	0.0293447	0.976648	-0.279281	0.780798	-2.88237	0.0050376	-1.55432	0.125644
ABCG1	1.23271	0.220663	0.487762	0.627894	-1.25023	0.214103	0.918944	0.361071	-5.30092	9.53667e-07	-1.63207	0.108178
ABCG2	2.47704	0.0149779	1.26001	0.213634	-1.14406	0.255305	-2.91712	0.00465855	-4.07656	0.000105172	-3.35081	0.00143473
ABCG4	-6.46523	4.08362e-09	-6.58594	2.90664e-08	-8.97314	1.63292e-14	-4.05171	0.000122863	-9.00145	7.14918e-14	-4.96434	6.59223e-06
ABCG5	0.765817	0.445645	-1.26588	0.211541	1.32201	0.18915	0.273198	0.785452	1.40431	0.164003	-0.659322	0.512344
ABCG8	-0.17041	0.865043	-1.68716	0.0979292	0.39168	0.69612	1.36302	0.176953	-0.52073	0.603958	0.244962	0.807366
ABHD1	-0.235293	0.814477	0.110036	0.91283	1.12007	0.265339	1.42911	0.157125	0.159355	0.873781	-0.965661	0.338293
ABHD10	1.82351	0.0713062	0.860614	0.393642	2.94659	0.00398975	-0.349997	0.727322	2.85083	0.00551432	1.30156	0.198303
ABHD11	-0.0857835	0.931815	-0.309728	0.758081	0.674858	0.501308	-1.89836	0.0614958	-0.474321	0.636532	-2.53721	0.013935
ABHD12	-0.220464	0.825974	-0.201855	0.840866	-0.53875	0.591245	-1.40019	0.16558	-2.14817	0.0346509	-2.2254	0.0300263
ABHD12B	0.943297	0.347872	0.111951	0.91132	1.10967	0.269776	1.87494	0.0646937	0.953433	0.343173	2.0156	0.0485649
ABHD13	2.66824	0.00893778	-0.612112	0.543294	4.838	4.71567e-06	0.764722	0.446836	-0.25733	0.797569	-3.37185	0.0013465
ABHD14A	-0.562475	0.57509	-2.01027	0.0499238	-0.0529159	0.957903	-0.586352	0.5594	-0.55304	0.581741	-1.52002	0.134035
ABHD14B	2.44878	0.0161293	2.19739	0.0327501	0.837211	0.40445	1.28941	0.201217	0.413311	0.680458	0.555124	0.580982
ABHD15	2.5962	0.0108906	1.35159	0.182714	1.03984	0.300897	-0.299537	0.765359	-0.602818	0.548294	-0.517697	0.606673
ABHD2	3.41207	0.000941682	1.11166	0.271709	1.67157	0.0977055	0.8521	0.396871	-0.564551	0.57392	-1.17865	0.243433
ABHD3	3.37727	0.00105482	2.1112	0.0398803	3.68618	0.000368376	2.37451	0.0201306	-0.0791121	0.937136	-1.90415	0.0619421
ABHD4	0.0669501	0.946759	1.41549	0.163249	-1.91829	0.0578988	-2.48515	0.0151783	-4.45119	2.66854e-05	-3.73348	0.000437966
ABHD5	1.43217	0.155309	0.828596	0.411351	-0.474855	0.635915	-0.533128	0.595522	-0.376181	0.707754	-1.28133	0.205265
ABHD6	2.74663	0.00717801	3.06883	0.00349731	2.70668	0.00798035	2.76407	0.00717923	2.27221	0.025692	3.25033	0.0019368
ABHD8	1.66482	0.0991749	-0.424138	0.673322	2.65349	0.00925479	0.538169	0.592054	0.817205	0.416179	-0.522513	0.603338
ABI1	2.10283	0.0380693	1.25293	0.216177	0.836692	0.404741	-1.05177	0.296282	-2.32198	0.0227151	-3.01985	0.00378008
ABI2	-3.06515	0.00281786	-1.48743	0.14331	-1.46028	0.147317	-2.12716	0.0366949	0.287008	0.77483	0.349788	0.727787
ABI3	3.35135	0.00114729	1.97367	0.0540722	3.19595	0.00186047	0.403642	0.687625	-1.3803	0.171246	-2.83248	0.00637397
ABI3BP	4.56705	1.45394e-05	4.74259	1.85895e-05	0.568545	0.570927	-0.909854	0.365814	-3.56283	0.000614578	-2.40618	0.0193854
ABL1	-0.639697	0.523878	2.05588	0.0451421	0.286307	0.775229	-0.34216	0.733188	0.303802	0.762048	0.396267	0.693388
ABL2	1.24982	0.214372	2.05805	0.0449246	-0.195628	0.845294	-0.656819	0.513308	-0.754876	0.452486	-0.706871	0.482526
ABLIM1	0.434083	0.665192	1.37296	0.176015	-1.88743	0.0619737	-1.33149	0.18706	-0.627178	0.532285	1.93313	0.0581924
ABLIM2	-3.09879	0.00254257	-0.930622	0.356612	-7.79161	6.05086e-12	-4.44341	3.00833e-05	-12.4675	1.26396e-20	-7.09708	2.19241e-09
ABLIM3	-2.17248	0.0322558	-3.93712	0.000260565	-3.23782	0.00163006	-3.21983	0.00189683	-9.68064	3.19901e-15	-10.7966	2.10249e-15
ABO	-0.208326	0.835411	-0.742188	0.461516	-0.936506	0.351246	0.437262	0.663178	-0.315633	0.753083	-0.289805	0.773017
ABP1	0.927481	0.355979	0.0601468	0.952283	2.24543	0.0269197	0.371907	0.711011	1.31022	0.193781	-0.772338	0.443105
ABR	-4.42451	2.53016e-05	-1.69088	0.0972121	-9.55774	8.46003e-16	-7.71858	4.08814e-11	-4.2227	6.20837e-05	-1.34356	0.184417
ABRA	-0.507793	0.612751	-1.42279	0.161132	-0.363649	0.71688	1.28883	0.201418	1.02845	0.30676	0.301498	0.764132
ABT1	1.75637	0.0821819	-0.423215	0.67399	3.92578	0.000158089	-0.117217	0.907001	2.74648	0.00740273	-0.997476	0.322749
ABTB1	1.6922	0.0938172	2.45228	0.0178043	0.0497458	0.960423	0.446718	0.656366	-3.73763	0.000342479	-0.551242	0.583622
ABTB2	1.61996	0.108488	2.11858	0.0392208	-0.71871	0.473979	0.643722	0.521719	-0.474779	0.636207	1.86086	0.0679239
ACAA1	0.0975706	0.922475	0.113823	0.909843	-1.5665	0.12036	-1.09896	0.275302	-1.55802	0.12308	-3.04343	0.0035347
ACAA2	0.315469	0.753083	1.90221	0.0630303	1.57001	0.11954	1.01417	0.313763	3.01548	0.00341485	2.5507	0.013461
ACACA	-4.54859	1.56295e-05	-1.45746	0.151369	-3.0173	0.00322759	-0.11313	0.91023	-1.7148	0.0901591	0.92259	0.36011
ACACB	-0.0661856	0.947366	3.32319	0.00168922	-3.08841	0.00259876	-0.968029	0.336141	-2.97189	0.00388338	-0.902059	0.370822
ACAD10	-5.06917	1.91309e-06	-3.03723	0.00381997	-2.53872	0.0126523	-2.03744	0.0451339	-4.97257	3.57051e-06	-3.33842	0.00148922
ACAD11	1.98705	0.0497368	2.57187	0.0131989	-2.98175	0.00359216	-2.4308	0.0174551	-0.543317	0.588386	0.780966	0.438054
ACAD8	-6.42092	5.01007e-09	-3.26395	0.00200653	-5.47786	3.16525e-07	-4.28702	5.31932e-05	-4.65877	1.21428e-05	-2.72874	0.0084394
ACAD9	0.187276	0.851835	0.50206	0.617874	2.23812	0.0274087	-0.0643141	0.948891	3.38451	0.00109604	2.49465	0.0155302
ACADL	-2.1935	0.0306608	0.973255	0.335207	-2.12569	0.0359675	0.124661	0.901126	-0.577596	0.56512	0.325615	0.745908
ACADM	-2.32024	0.0224238	-2.64076	0.0110671	-1.63352	0.105474	-2.13005	0.0364475	-2.50713	0.0141459	-3.99586	0.000187137
ACADS	-1.01098	0.314541	-2.42637	0.0189765	0.0491481	0.960898	-2.30642	0.0238509	-2.55192	0.012569	-3.74254	0.000425497
ACADSB	-0.777635	0.438677	-1.6427	0.106848	-1.29716	0.197533	-1.70076	0.0931309	-1.93115	0.05692	-3.43386	0.00111543
ACADVL	-1.98786	0.0496458	-0.252862	0.801433	-5.99892	3.11713e-08	-3.88598	0.000218132	-6.92008	9.16313e-10	-5.74285	3.7787e-07
ACAN	0.865427	0.38894	3.00896	0.00413205	-0.933327	0.352877	1.06886	0.288559	1.16954	0.245575	3.00768	0.0039129
ACAP1	1.58252	0.116786	-0.0366401	0.970921	1.52109	0.131362	0.598194	0.551513	-3.54844	0.000644389	-4.69286	1.73237e-05
ACAP2	1.0854	0.280436	1.34112	0.186066	-0.780971	0.436646	-1.09716	0.27608	-2.66104	0.00937002	-0.85029	0.398721
ACAP3	-5.53106	2.6945e-07	-5.6521	8.00344e-07	-5.09922	1.59883e-06	-4.15703	8.47342e-05	-6.77693	1.73104e-09	-4.62828	2.17373e-05
ACAT1	-3.51135	0.000678379	-0.763799	0.448649	-7.11693	1.63825e-10	-5.1668	1.90406e-06	-0.449559	0.654215	0.20244	0.840294
ACAT2	0.0514502	0.959073	-2.39358	0.0205591	0.988108	0.325461	-2.34946	0.0214347	1.27297	0.206627	-0.842772	0.402878
ACBD3	2.06719	0.0413799	1.98202	0.0531	1.0437	0.299114	0.281949	0.778759	-0.077647	0.938298	-0.238412	0.812416
ACBD4	0.477092	0.63437	-0.608081	0.545942	1.53687	0.127451	2.75574	0.00734714	-2.48244	0.015089	-1.47326	0.146181
ACBD5	-0.203534	0.839144	-0.871267	0.387857	-1.86	0.0657957	-2.6298	0.0103614	-0.953462	0.343158	-1.44197	0.154784
ACBD6	-1.62258	0.107925	-0.00217429	0.998274	-0.278769	0.780992	-0.0512491	0.959263	3.20929	0.0018999	3.03107	0.00366139
ACBD7	-1.7499	0.0832973	-1.00177	0.321378	3.99395	0.000123504	1.55718	0.123638	3.51563	0.000717579	1.80993	0.07558
ACCN1	-2.68638	0.00849883	-3.94585	0.000253474	-0.743026	0.459191	-0.997344	0.321804	-9.47527	8.17354e-15	-5.69828	4.46329e-07
ACCN2	-3.22863	0.00169773	-2.01334	0.0495884	-1.00781	0.315956	-0.736279	0.463858	-1.69247	0.0943526	-1.82981	0.0725092
ACCN3	-0.0841382	0.93312	0.587738	0.559407	-0.587899	0.557912	1.00923	0.316108	-2.09	0.039716	-0.678752	0.500041
ACCN4	-1.85888	0.0660763	-0.240139	0.811224	1.95613	0.0532115	2.43856	0.0171125	1.42516	0.157905	3.90603	0.000251157
ACCN5	0.50124	0.617338	1.51356	0.136562	1.60514	0.111586	0.464619	0.64355	0.911139	0.364893	1.85092	0.0693651
ACCS	0.000799111	0.999364	-0.445705	0.657774	-2.88638	0.00476614	1.03687	0.303129	-2.76868	0.00695735	-0.497091	0.621037
ACD	-0.214577	0.830548	-1.53579	0.131023	2.27833	0.0248126	-0.152829	0.878943	2.95483	0.00408253	0.906876	0.36829
ACE	-0.745214	0.457944	-1.48564	0.143781	0.495189	0.621542	0.677944	0.499894	-3.17953	0.00208202	-1.82842	0.07272
ACE2	0.789016	0.432027	0.216677	0.829359	1.26251	0.209674	0.682826	0.496821	2.66978	0.00914893	0.613404	0.542049
ACER1	1.5583	0.122418	0.396635	0.693359	2.38885	0.0187581	2.23184	0.0286123	2.46075	0.0159639	0.363827	0.717333
ACER2	-0.847053	0.39905	-2.26533	0.0279477	0.823006	0.412443	0.235761	0.814261	-0.360139	0.719669	-2.1877	0.0328074
ACER3	-1.22593	0.223193	1.95843	0.0558852	-2.37812	0.0192823	-1.46089	0.148223	-2.61037	0.0107502	-1.50699	0.137337
ACHE	-0.65058	0.516856	-1.97088	0.0543999	-3.41218	0.000928249	-3.84508	0.000250808	-9.27764	2.01838e-14	-7.21473	1.39571e-09
ACIN1	2.99946	0.00343674	1.76208	0.0842926	3.28091	0.00142092	0.907405	0.367099	0.903206	0.369062	-0.751168	0.455642
ACLY	-0.841326	0.402235	-1.19717	0.237001	0.253496	0.8004	-1.91174	0.0597297	-1.17576	0.243094	-1.63609	0.107331
ACMSD	0.720388	0.473018	0.272278	0.786552	1.85456	0.0665769	0.810918	0.419978	2.1824	0.0319407	1.47578	0.145507
ACN9	3.15653	0.00212749	3.20641	0.00236811	4.43935	2.30883e-05	2.94983	0.00423909	5.38008	6.89892e-07	3.04135	0.00355572
ACO1	3.28534	0.00141825	2.90637	0.00547636	1.13008	0.26112	0.778233	0.43888	-0.579563	0.563799	-1.69613	0.095317
ACO2	-0.0852378	0.932248	-1.32234	0.192196	0.589605	0.556772	-1.71845	0.0898406	-0.556677	0.579264	-1.07333	0.287644
ACOT11	-0.9055	0.367444	-0.110248	0.912663	-1.89405	0.061079	-0.374388	0.709172	-3.64785	0.000463437	-0.901318	0.371212
ACOT12	1.96841	0.0518748	-1.05288	0.297562	1.77211	0.0793926	-0.0058239	0.995369	1.19627	0.235038	-0.819179	0.416096
ACOT13	2.80871	0.0060153	3.54112	0.000884985	-0.372351	0.710412	-1.53989	0.127796	1.20674	0.231003	-0.636501	0.526998
ACOT2	0.890954	0.375159	2.80888	0.00712104	-0.281352	0.779016	0.494553	0.622362	1.37892	0.17167	2.56327	0.0130326
ACOT4	2.4572	0.0157782	0.877598	0.384445	1.16102	0.24837	0.812244	0.419222	2.37851	0.0197075	0.699862	0.48686
ACOT7	0.198099	0.843382	-2.76613	0.00797762	0.494392	0.622103	-0.594757	0.553796	-1.10501	0.272388	-2.21744	0.0305956
ACOT8	1.09773	0.275041	-1.81434	0.0757496	2.51013	0.0136566	-1.34012	0.184253	0.817416	0.41606	-2.53865	0.0138835
ACOT9	1.70466	0.0914584	4.54297	3.6337e-05	-2.42242	0.0171989	0.586352	0.5594	-0.875466	0.383878	1.55361	0.125812
ACOX1	1.22136	0.224911	-0.985304	0.329315	4.28207	4.22596e-05	1.81364	0.0737331	-1.07916	0.283682	-2.50084	0.0152887
ACOX2	2.70361	0.00810013	2.94497	0.00492882	-0.655154	0.513858	-1.64264	0.104643	-0.461999	0.645305	-0.903725	0.369945
ACOX3	-1.0874	0.279556	0.226883	0.821458	-0.925951	0.356679	-0.010452	0.991688	-2.41577	0.017924	0.801889	0.425948
ACOXL	0.615103	0.539927	-0.983625	0.330132	0.559105	0.577328	0.467973	0.641161	0.520616	0.604037	-0.656123	0.514385
ACP1	-0.803124	0.423866	0.30254	0.763521	3.33338	0.00120019	2.28945	0.0248682	2.71291	0.0081257	2.71568	0.00873906
ACP2	2.0035	0.0479136	-0.607698	0.546194	2.00008	0.048177	-0.179459	0.858061	-3.642	0.000472598	-3.9121	0.00024624
ACP5	1.47397	0.143729	2.64775	0.0108697	1.8443	0.0680705	1.31536	0.192397	-1.35114	0.180366	-1.14087	0.258693
ACP6	3.75469	0.000295945	4.54989	3.55076e-05	1.85741	0.0661669	3.67892	0.00043834	4.23245	5.99176e-05	4.96974	6.46566e-06
ACPL2	-0.344322	0.731349	-0.00108188	0.999141	2.53465	0.0127908	1.48235	0.142437	3.83212	0.000247929	4.2589	7.76982e-05
ACPP	1.95354	0.0536366	1.60222	0.115536	1.56614	0.120444	-0.288743	0.773574	0.368234	0.713648	-2.476	0.0162801
ACPT	2.31973	0.0224523	-0.744913	0.459882	2.84188	0.00542652	0.644616	0.521143	2.67856	0.0089316	2.01055	0.0491122
ACR	1.56061	0.121872	-0.40216	0.689315	-0.460563	0.646102	0.312993	0.755154	1.25394	0.213429	0.259526	0.796165
ACRBP	-2.92265	0.00431873	0.553428	0.582487	-2.00131	0.0480417	-0.0795872	0.936778	-3.21897	0.00184389	-0.525519	0.601261
ACRC	1.18624	0.238424	1.93452	0.0588337	-0.845844	0.399639	0.612183	0.542268	0.813538	0.418266	1.91404	0.0606405
ACRV1	-0.150006	0.881071	0.340604	0.734858	0.104066	0.917324	1.29585	0.199001	4.25336	5.5513e-05	4.82646	1.07939e-05
ACSBG1	0.917358	0.36123	-0.381122	0.704761	-0.242705	0.808726	0.309333	0.757926	-1.13809	0.258397	-0.979511	0.331467
ACSBG2	1.72463	0.0877789	-1.41351	0.163828	3.07929	0.00267255	0.822177	0.413582	2.02739	0.0458705	1.66151	0.102101
ACSF2	0.548575	0.584558	1.03298	0.306685	-1.46131	0.147035	-1.96479	0.0531429	-2.58586	0.0114818	-2.77081	0.00753697
ACSF3	1.54429	0.125775	1.88742	0.0650338	-2.00355	0.0477972	-1.56047	0.122859	4.29014	4.85103e-05	4.77896	1.27781e-05
ACSL1	0.802125	0.424441	2.07096	0.043651	-2.23596	0.0275549	-2.65249	0.00974654	0.442383	0.659377	0.402485	0.688833
ACSL3	1.1454	0.254861	0.236319	0.81417	0.199647	0.842158	-1.09372	0.27758	-1.0651	0.289956	-1.60626	0.113742
ACSL4	1.77219	0.0795025	1.30774	0.197064	-0.412424	0.680903	-0.669058	0.505513	-2.17388	0.0325976	-2.57847	0.0125314
ACSL5	3.3371	0.00120131	3.37573	0.00144813	1.93128	0.0562523	1.17564	0.243458	-3.29189	0.00146931	-4.68444	1.78453e-05
ACSL6	-0.493372	0.622865	-1.51131	0.137131	-0.221157	0.825417	1.08093	0.283191	-5.75783	1.43303e-07	-3.66085	0.000551386
ACSM1	1.51201	0.133781	-1.66003	0.103296	1.61212	0.110056	0.271237	0.786954	1.6326	0.106387	-0.516808	0.60729
ACSM2B	0.786786	0.433325	0.681213	0.498943	0.638863	0.524358	1.19256	0.236801	0.60318	0.548054	1.42381	0.159952
ACSM3	0.219773	0.82651	1.60552	0.114807	-0.499931	0.618211	-0.108668	0.913756	-0.424734	0.672143	-2.18083	0.0333373
ACSM5	2.34946	0.0208279	1.1563	0.253165	0.124035	0.901534	-0.0332839	0.973537	-0.515067	0.607892	-1.23853	0.220597
ACSS1	2.52319	0.013255	2.53283	0.0145669	0.992125	0.323508	0.832667	0.407676	-0.550075	0.583763	-0.698174	0.487907
ACSS2	-0.846341	0.399445	0.267633	0.790106	-2.21114	0.0292813	-2.30424	0.0239795	-4.36636	3.66131e-05	-5.16923	3.14211e-06
ACSS3	2.54646	0.0124557	2.6686	0.0102991	-1.99707	0.0485075	-1.77865	0.0793491	-3.68014	0.000415881	-4.03119	0.000166545
ACTA1	2.58237	0.011307	-0.497551	0.621026	1.89049	0.0615587	-1.88089	0.0638689	1.92539	0.0576469	-0.147604	0.883176
ACTA2	3.22728	0.00170499	3.69385	0.000556098	1.10191	0.273121	-0.596461	0.552664	-1.09941	0.274808	0.0956136	0.924163
ACTB	1.26635	0.208422	0.0476528	0.962187	1.9332	0.0560121	0.968722	0.335798	0.363613	0.717083	0.304439	0.761902
ACTC1	2.60283	0.0106962	1.58684	0.118981	2.42324	0.0171627	-0.752862	0.453889	2.01494	0.0471881	0.343596	0.732415
ACTG1	0.893219	0.373951	-0.619678	0.538341	3.53323	0.000620705	-1.73623	0.0866293	2.40897	0.0182382	0.36642	0.715409
ACTG2	2.34548	0.0210391	4.12547	0.000142882	1.06518	0.289333	-0.166221	0.868431	0.302825	0.76279	1.81072	0.0754557
ACTL6A	1.99864	0.0484462	1.48364	0.144308	6.06766	2.28007e-08	1.59734	0.114394	7.1868	2.77929e-10	3.84847	0.000302763
ACTL6B	-2.49214	0.0143933	-3.61761	0.000702076	2.18665	0.0310769	0.29721	0.767128	-1.16721	0.246507	-3.30032	0.00166929
ACTL7A	2.79917	0.00618196	-0.248946	0.804443	3.32229	0.00124397	1.5336	0.129337	3.5627	0.00061485	1.94766	0.0563874
ACTL7B	0.770171	0.44307	-1.61676	0.11235	2.00362	0.0477894	1.09006	0.279175	2.43187	0.0171992	0.257405	0.797793
ACTL8	1.41917	0.159055	-0.185153	0.853873	1.37026	0.173643	0.545392	0.587102	1.49102	0.139793	1.62123	0.110487
ACTL9	0.0697803	0.944512	-0.770119	0.444926	1.96568	0.052081	1.00234	0.3194	0.841411	0.402565	0.604616	0.547833
ACTN1	2.66182	0.00909793	3.42575	0.00124928	2.84962	0.005306	1.71798	0.0899256	-0.406983	0.685081	-0.184739	0.85409
ACTN2	1.21371	0.227807	0.257251	0.798062	3.82744	0.000224645	0.21857	0.827579	0.0797631	0.93662	-1.58445	0.118624
ACTN3	2.43344	0.0167868	-0.440935	0.6612	2.55411	0.0121392	0.879765	0.381797	3.20268	0.00193902	0.388534	0.699068
ACTN4	2.29656	0.0237949	3.294	0.00183911	0.47904	0.632945	-0.966194	0.337053	-1.21002	0.229746	0.0526073	0.958229
ACTR10	1.03273	0.304299	-0.656379	0.514651	2.13012	0.0355908	-0.684924	0.495503	-0.873345	0.385025	-3.44954	0.00106325
ACTR1A	-1.24963	0.214441	-2.40863	0.0198184	-0.456573	0.648958	-1.34589	0.182394	-2.48907	0.0148303	-2.86932	0.0057606
ACTR1B	-1.02541	0.30772	-1.87121	0.0672935	0.372192	0.71053	-4.15555	8.518e-05	0.876383	0.383382	-1.73822	0.0875718
ACTR2	2.65106	0.00937217	0.824591	0.4136	0.303801	0.761905	-2.56501	0.0123152	-0.4285	0.66941	-1.58275	0.119011
ACTR3	2.3155	0.0226925	1.34451	0.184975	1.98599	0.0497446	-1.65695	0.101707	-0.503954	0.615645	-3.29674	0.00168721
ACTR3B	-1.93234	0.0562351	-0.525694	0.601472	-0.287528	0.774297	1.23784	0.219638	0.398014	0.691654	1.74306	0.0867157
ACTR3C	1.99498	0.0488503	1.09757	0.277758	1.38586	0.168841	2.61867	0.0106755	-1.80395	0.0749116	-1.18666	0.240283
ACTR5	-1.9327	0.0561903	-0.345753	0.731008	0.957017	0.340844	-0.679538	0.498889	1.21855	0.22651	1.25868	0.213277
ACTR6	-0.155401	0.876828	-0.340508	0.73493	2.34849	0.0207975	-0.366569	0.714973	0.897211	0.372233	-0.721644	0.473463
ACTR8	-3.00237	0.00340686	-1.04556	0.300894	-0.482555	0.630456	-1.83746	0.0701035	-0.132393	0.894998	-0.536011	0.594037
ACTRT1	1.46562	0.145986	-1.34612	0.184459	2.63503	0.00973823	1.35224	0.180362	2.57146	0.0119323	1.23002	0.223742
ACTRT2	0.325527	0.745483	0.222026	0.825217	0.0964062	0.923389	-0.511238	0.610686	-0.462456	0.644979	-0.224978	0.822801
ACVR1	0.67047	0.504151	1.43079	0.158836	-4.66718	9.40333e-06	-4.12194	9.59534e-05	-2.89872	0.00480564	-1.17349	0.245479
ACVR1B	-6.06881	2.496e-08	-4.25445	9.40865e-05	-2.34028	0.0212358	-2.44081	0.0170142	-5.22442	1.30146e-06	-2.70636	0.00895875
ACVR2A	-5.10863	1.62357e-06	-3.59678	0.000747931	-4.16687	6.52451e-05	-4.50589	2.38891e-05	-3.38028	0.00111096	-3.61684	0.000633255
ACVR2B	-4.89325	3.94427e-06	-3.50839	0.000976473	-0.851138	0.396706	-0.888293	0.377223	0.481442	0.631485	0.0669861	0.946827
ACVRL1	1.93707	0.0556457	3.57477	0.000799519	-0.192616	0.847647	0.346123	0.730219	-2.98614	0.00372405	-1.51142	0.136207
ACY1	0.103691	0.917629	1.55949	0.125317	-0.91239	0.363736	-2.06365	0.042511	2.00557	0.0481997	2.56811	0.0128711
ACY3	1.78122	0.0780067	-0.16078	0.872928	1.049	0.296683	1.21729	0.227309	1.724	0.0884757	0.544267	0.588381
ACYP1	-0.969963	0.334477	-0.482414	0.63166	2.40034	0.0182111	1.30745	0.195055	2.78369	0.00667028	-0.0954175	0.924318
ACYP2	0.0282068	0.977555	0.192	0.848536	-4.94125	3.08653e-06	-4.74545	9.72764e-06	-4.95657	3.80397e-06	-6.73461	8.79725e-09
ADA	3.60788	0.000490275	2.26225	0.0281514	4.20156	5.72904e-05	0.772489	0.442253	-0.372067	0.710803	-3.13173	0.00274181
ADAD1	1.12222	0.26454	2.4292	0.0188449	0.213704	0.831209	0.725119	0.470635	1.0855	0.280883	1.14709	0.256137
ADAD2	-0.0217903	0.98266	0.894484	0.375436	-0.884184	0.378697	1.58376	0.117457	0.224357	0.823037	1.29532	0.200431
ADAL	-0.398001	0.691504	0.082278	0.934761	-0.271945	0.78622	-0.0498331	0.960388	-0.0108531	0.991367	-0.160668	0.872923
ADAM10	0.0246661	0.980372	0.338797	0.73621	1.28475	0.20182	-0.363238	0.717449	-1.46049	0.147976	-1.77744	0.0808304
ADAM11	-0.419437	0.675824	-0.463303	0.645199	2.52339	0.013182	1.36985	0.174822	1.95095	0.0544784	0.840164	0.404327
ADAM12	1.57693	0.118067	3.22118	0.00226984	0.0886382	0.929545	-0.584172	0.560858	-3.96965	0.000153616	-1.16774	0.247772
ADAM15	1.50258	0.136196	2.70808	0.00929326	-1.0543	0.294261	-1.37834	0.172196	-0.689336	0.492558	0.199077	0.842911
ADAM17	2.22077	0.0286934	2.57316	0.0131557	1.76604	0.080411	1.43627	0.155084	-0.187526	0.851711	0.288818	0.773769
ADAM18	0.512709	0.60932	0.177519	0.859833	1.53539	0.127814	-0.423432	0.673192	1.13206	0.26091	0.369954	0.712788
ADAM19	-0.450553	0.653317	-1.47255	0.147267	-0.239791	0.810978	-0.0179761	0.985706	-8.2618	2.11426e-12	-5.68892	4.62209e-07
ADAM20	0.82971	0.40874	0.806862	0.423645	-0.512563	0.609377	0.604633	0.547248	1.31174	0.19327	1.48232	0.143763
ADAM21	-0.221888	0.824868	-0.0583312	0.953722	0.133354	0.894179	0.581281	0.562794	0.149835	0.881262	0.277268	0.782577
ADAM22	-2.05961	0.0421144	0.345319	0.731333	-0.248308	0.8044	0.577974	0.565013	2.20307	0.0303953	4.08132	0.000141039
ADAM23	-0.390659	0.696906	1.71274	0.0930829	-4.87627	4.03231e-06	-2.74797	0.00750694	-2.78411	0.00666238	0.859945	0.393422
ADAM28	4.42871	2.4896e-05	4.12644	0.000142434	2.30782	0.0230488	0.945371	0.347505	-6.77253	1.76516e-09	-4.58639	2.51683e-05
ADAM29	1.97443	0.051176	0.698793	0.487985	2.50043	0.0140134	-0.971806	0.334271	4.04877	0.00011612	2.01359	0.0487822
ADAM30	1.28658	0.201304	0.394513	0.694914	2.26171	0.0258583	1.63418	0.106411	2.3011	0.0239245	-0.231664	0.817628
ADAM32	0.551218	0.582752	1.40176	0.167289	-0.202099	0.840246	-1.18895	0.23821	0.721859	0.472434	0.573761	0.568387
ADAM33	1.37965	0.170866	2.11407	0.0396223	0.56796	0.571322	0.641052	0.523443	-0.192799	0.847593	0.548183	0.585707
ADAM3A	-0.0864601	0.931279	-0.557843	0.579492	0.367316	0.714152	-0.765531	0.446358	0.728195	0.468568	-0.6725	0.503983
ADAM5P	-0.368895	0.71301	0.534195	0.595622	-0.295191	0.768454	-0.244125	0.8078	-0.211811	0.83278	0.448087	0.655789
ADAM6	4.4853	2.00017e-05	3.51347	0.000961706	5.99845	3.12384e-08	4.26414	5.7767e-05	1.00867	0.3161	-0.565764	0.573775
ADAM7	0.910234	0.364955	-0.188931	0.850927	1.863	0.0653676	0.604002	0.547665	1.70178	0.0925861	0.589154	0.558086
ADAM8	2.94241	0.00407384	0.671657	0.504956	3.05843	0.00284859	2.18792	0.0317902	0.0734755	0.941607	0.952728	0.344751
ADAM9	2.23235	0.0278924	4.60009	3.00233e-05	-1.44348	0.15198	-1.06004	0.292529	-2.07847	0.0407925	-0.174233	0.8623
ADAMDEC1	-0.0200827	0.984019	-1.54476	0.128839	2.23577	0.0275674	-0.672255	0.503487	-5.23902	1.22668e-06	-6.15327	8.05883e-08
ADAMTS1	3.10077	0.0025272	3.12765	0.00296362	-1.36578	0.175041	-4.18197	7.75382e-05	-1.85792	0.0667698	-0.176722	0.860353
ADAMTS10	-3.64437	0.000432983	-1.39039	0.170694	-6.86242	5.5609e-10	-6.21594	2.62752e-08	-1.95898	0.0535142	-1.16988	0.246919
ADAMTS12	1.74941	0.083383	3.88478	0.000307272	-1.60959	0.11061	-1.13607	0.259545	-1.66964	0.0988049	-0.977474	0.332465
ADAMTS13	0.561332	0.575866	0.535048	0.595036	1.11794	0.266243	1.49645	0.138733	2.59244	0.0112809	1.67096	0.100211
ADAMTS14	1.99355	0.0490097	1.61832	0.112015	0.451162	0.65284	0.774646	0.440984	2.61133	0.0107224	2.20109	0.0317942
ADAMTS15	1.65472	0.101213	1.26438	0.212075	-0.954404	0.342158	-1.34973	0.181163	-0.797027	0.427737	-1.06639	0.290743
ADAMTS16	0.998536	0.320504	2.60611	0.0120965	-0.979082	0.329879	-0.71917	0.474271	2.68687	0.00873005	4.4139	4.57665e-05
ADAMTS17	2.49047	0.0144571	1.82629	0.073902	2.59367	0.010906	1.91056	0.0598838	6.4279	8.04851e-09	6.56305	1.69518e-08
ADAMTS18	4.09995	8.59123e-05	1.82581	0.0739753	1.6914	0.093843	-0.268792	0.788828	1.86783	0.0653578	0.813571	0.419276
ADAMTS19	1.33738	0.184225	1.77021	0.0829133	0.610859	0.542665	0.667043	0.506792	3.32618	0.00131903	3.94816	0.000218869
ADAMTS2	-0.189003	0.850485	1.69761	0.0959257	-1.52753	0.129756	-0.482254	0.63103	-2.63018	0.01019	-0.195008	0.84608
ADAMTS20	2.62964	0.00994057	1.78114	0.0810892	3.31553	0.00127141	1.73417	0.0869966	5.88916	8.21969e-08	4.9654	6.56731e-06
ADAMTS3	2.11587	0.0369164	4.18733	0.00011701	0.892413	0.374293	-0.182804	0.855445	2.35773	0.0207694	4.32979	6.1054e-05
ADAMTS4	2.64667	0.00948623	3.48554	0.00104561	1.04611	0.298007	0.0200061	0.984092	-0.415058	0.679183	0.760395	0.450153
ADAMTS5	2.34267	0.0211897	4.84195	1.32729e-05	-0.585406	0.55958	0.222116	0.824828	0.974396	0.332726	1.74058	0.0871527
ADAMTS6	2.7243	0.007644	2.82084	0.00689728	0.952238	0.34325	0.342075	0.733251	1.45182	0.150367	0.0551063	0.956246
ADAMTS7	0.740887	0.460552	1.81826	0.07514	0.517662	0.605826	1.0217	0.310205	0.871472	0.386041	1.2657	0.210769
ADAMTS8	1.38623	0.168854	-0.559008	0.578702	1.08876	0.278852	-2.0201	0.0469452	0.647122	0.51936	-2.13406	0.037153
ADAMTS9	2.74271	0.00725781	5.34814	2.32075e-06	-0.542936	0.58837	-0.482092	0.631145	0.161127	0.872389	2.36757	0.0213222
ADAMTSL1	3.23593	0.00165909	4.10855	0.000150875	-1.2337	0.220178	-1.1699	0.245744	0.409299	0.683387	0.633356	0.529034
ADAMTSL3	3.2152	0.00177106	2.66548	0.0103825	-2.55135	0.0122297	-2.29314	0.0246434	-4.66189	1.19983e-05	-3.07508	0.00322859
ADAMTSL4	1.49776	0.137443	0.261726	0.79463	0.269166	0.788351	1.34983	0.181132	1.57623	0.118824	1.89403	0.0632997
ADAMTSL5	1.54621	0.125311	2.32692	0.0241463	0.041228	0.967196	1.38157	0.171207	0.331085	0.741425	0.59306	0.555487
ADAP1	-0.661967	0.509562	0.0382758	0.969623	-1.3361	0.184519	-0.380705	0.704499	-0.154722	0.877421	0.0896188	0.928904
ADAP2	3.77562	0.000275106	4.50627	4.10602e-05	-0.0883321	0.929788	0.487933	0.627021	-4.93883	4.08034e-06	-2.81955	0.0066031
ADAR	1.78167	0.077932	2.16087	0.0356215	0.512765	0.609235	0.545688	0.5869	-1.03396	0.304193	-1.04033	0.302579
ADARB1	0.303062	0.762491	0.563881	0.575407	-4.08507	8.84225e-05	-2.88348	0.00512969	-4.88565	5.03108e-06	-4.74468	1.44278e-05
ADARB2	0.709606	0.479651	0.738679	0.463625	0.831531	0.407635	-0.559153	0.577723	2.67741	0.0089598	2.49181	0.0156427
ADAT1	3.42276	0.000909279	0.955469	0.344031	5.99328	3.19795e-08	3.56843	0.000630321	2.6331	0.0101098	0.897046	0.373467
ADAT2	-0.264954	0.791607	1.94494	0.0575322	-1.80775	0.0736215	-1.14619	0.255361	2.46517	0.015782	5.12648	3.6703e-06
ADAT3	0.647453	0.518868	1.66882	0.10153	1.21423	0.227492	2.34333	0.021765	2.25545	0.0267688	2.79917	0.00697986
ADC	2.06549	0.0415438	0.0718264	0.943032	1.36552	0.175122	0.281541	0.779071	-5.33021	8.46184e-07	-4.74393	1.44658e-05
ADCK1	0.831585	0.407686	-0.444934	0.658327	4.4396	2.3066e-05	2.20239	0.0307106	0.320179	0.749647	-1.35218	0.181659
ADCK2	-0.844785	0.40031	-1.11714	0.26938	-0.13234	0.894979	0.316524	0.752484	-2.19529	0.0309694	-3.0018	0.00397855
ADCK3	-1.98745	0.0496918	0.491527	0.625248	-0.914296	0.362739	-0.572465	0.568719	2.07638	0.0409903	3.50444	0.000898254
ADCK4	1.8694	0.064584	0.332863	0.740658	2.04354	0.0436029	0.12243	0.902886	0.795572	0.428578	1.45362	0.151535
ADCK5	0.108689	0.913674	-1.76517	0.083767	0.323005	0.747359	-0.288393	0.773842	0.446489	0.656421	-0.5742	0.568091
ADCY1	-8.47877	2.55185e-13	-5.80783	4.6213e-07	-7.92957	3.05562e-12	-4.94912	4.45586e-06	-10.8665	1.48472e-17	-7.47664	5.10689e-10
ADCY10	0.772756	0.441546	-1.25756	0.214512	1.03574	0.302798	-0.752425	0.454151	1.74947	0.0839505	-0.792656	0.431265
ADCY2	-0.185022	0.853598	-2.30958	0.025167	-2.14816	0.034092	-1.84497	0.0689896	-3.9138	0.000186802	-4.60147	2.38764e-05
ADCY3	0.323031	0.747367	2.59427	0.0124677	-2.69321	0.00828703	0.569119	0.570976	-1.13933	0.257882	1.88318	0.0647815
ADCY4	1.81061	0.073297	3.32296	0.00169036	-2.21577	0.0289519	-0.547572	0.585612	-3.0783	0.0028311	-2.66231	0.0100678
ADCY5	-0.828204	0.409588	-0.913477	0.365465	-2.16472	0.0327647	-0.743092	0.459747	-3.71613	0.000368365	-0.573328	0.568678
ADCY6	-3.67812	0.0003857	-0.276295	0.783483	-4.46865	2.05997e-05	-2.72957	0.0078979	-3.32651	0.00131766	0.56813	0.572178
ADCY7	1.69854	0.0926116	2.93659	0.00504316	1.69165	0.0937956	3.23542	0.00180829	-0.971681	0.334067	0.96361	0.339312
ADCY8	3.09119	0.00260252	0.637499	0.526767	1.7018	0.0918688	0.920489	0.360268	0.833827	0.406801	1.90073	0.0623978
ADCY9	-2.7009	0.00816169	-0.229862	0.819156	-1.45036	0.150057	-0.888792	0.376957	-1.1033	0.273126	0.241453	0.810071
ADCYAP1	-0.351409	0.726044	-0.342214	0.733653	-3.9354	0.000152703	-2.00486	0.0485868	-5.08123	2.31652e-06	-4.32411	6.22483e-05
ADCYAP1R1	-0.855516	0.394374	1.324	0.191645	-1.22339	0.224031	1.21744	0.227253	0.0309167	0.975411	2.81043	0.00676919
ADD1	-0.78689	0.433264	-0.403277	0.688499	-1.73444	0.0858906	-1.11099	0.270122	-4.10396	9.53504e-05	-2.83294	0.00636594
ADD2	-3.03031	0.00313195	-2.15221	0.0363337	0.00322952	0.99743	-0.58881	0.557758	-0.592268	0.555301	-0.617733	0.539212
ADD3	0.619949	0.536745	0.0260447	0.979327	-0.2258	0.821813	-1.17662	0.243068	-1.75261	0.0834074	-2.04393	0.0455909
ADH1A	2.25444	0.026418	3.09661	0.00323486	0.380383	0.70446	-0.141027	0.888226	-1.47502	0.144038	-1.67262	0.0998829
ADH1B	2.45722	0.0157777	3.00732	0.0041509	0.0919825	0.926894	-1.14263	0.256826	-2.826	0.00591858	-3.34314	0.00146826
ADH1C	1.66634	0.0988713	3.75851	0.000455564	-1.26214	0.209807	-0.630037	0.530585	-1.28431	0.202649	-3.25827	0.00189178
ADH4	0.337075	0.736788	-0.575249	0.567755	1.6601	0.0999964	0.858719	0.393232	1.98406	0.0505951	0.879536	0.382804
ADH5	1.87393	0.0639493	1.31664	0.194085	3.09104	0.00257787	0.486823	0.627803	2.06722	0.0418677	0.691951	0.491777
ADH6	-0.0657841	0.947685	0.134712	0.893391	0.339913	0.734628	-0.558406	0.578231	1.18929	0.237757	0.577516	0.565865
ADH7	0.859884	0.391973	0.279999	0.780657	0.955289	0.341712	1.09331	0.277759	1.25451	0.213221	1.92001	0.0598661
ADHFE1	2.70205	0.00813548	2.42492	0.0190439	-1.14895	0.25329	-0.966259	0.33702	-1.39194	0.167704	-0.909815	0.366751
ADI1	3.33208	0.00122088	4.16237	0.000126849	1.77102	0.0795738	0.659792	0.511409	2.04075	0.0444924	0.0200444	0.984078
ADIG	1.39589	0.165933	-0.0298026	0.976346	1.96171	0.0525482	2.26	0.0267239	1.83113	0.070713	0.94904	0.346607
ADIPOQ	1.327	0.187623	1.79541	0.0787567	0.795156	0.428387	-0.0661323	0.947449	-0.240613	0.810455	-0.104303	0.917295
ADIPOR1	2.40527	0.0180569	1.54903	0.127809	2.65464	0.00922525	1.47796	0.143605	-0.845664	0.400201	-1.36355	0.178072
ADIPOR2	-1.76107	0.0813781	-0.776735	0.441049	-0.303125	0.762418	1.03395	0.304482	-1.74703	0.0843763	-1.03956	0.302932
ADK	1.44364	0.152063	-0.295891	0.768564	1.73285	0.0861754	-2.00007	0.0491135	2.29255	0.0244361	0.122309	0.903084
ADM	2.99443	0.00348896	2.80043	0.00728341	1.13638	0.258488	1.61361	0.110812	1.29668	0.198377	2.84813	0.00610628
ADM2	2.90642	0.00452993	0.483244	0.631075	4.37163	2.99995e-05	2.7762	0.00694114	4.24396	5.74521e-05	2.08337	0.0417128
ADNP	-1.60033	0.112777	-0.742211	0.461503	2.19306	0.0305972	0.464429	0.643686	2.42895	0.0173287	0.61196	0.542998
ADNP2	2.73444	0.00742904	1.73171	0.0896175	4.79422	5.63563e-06	3.02094	0.00344492	4.82136	6.47132e-06	3.28164	0.00176489
ADO	0.894274	0.373389	0.89968	0.372691	5.09898	1.60048e-06	1.7989	0.0760579	4.64817	1.26464e-05	2.5752	0.0126376
ADORA1	3.17809	0.00198939	0.896617	0.374308	3.65161	0.000415017	1.33947	0.184464	3.00152	0.00355884	2.97447	0.00429764
ADORA2A	-0.475641	0.6354	-1.48717	0.143377	1.38686	0.168538	-0.433746	0.665718	-0.195602	0.845406	0.788169	0.433864
ADORA2B	3.38458	0.00103006	0.0782636	0.937937	3.66465	0.000396797	-0.085375	0.932191	3.81575	0.000262298	1.32417	0.190733
ADORA3	2.36396	0.0200739	2.34499	0.0231223	0.444101	0.65792	-1.68306	0.0965225	-2.35887	0.0207095	-2.98956	0.00411871
ADPGK	3.56829	0.000560504	1.91783	0.0609706	2.69839	0.00816792	0.330206	0.742165	2.23133	0.0283887	0.476835	0.635302
ADPRH	3.661	0.000409035	3.07438	0.00344327	0.762301	0.447657	-1.10913	0.270918	-2.52458	0.0135116	-2.78762	0.00720202
ADPRHL1	-2.7449	0.0072132	-3.32008	0.0017046	-3.71758	0.000330369	-1.97603	0.0518294	-4.58272	1.62381e-05	-2.12478	0.0379533
ADPRHL2	0.43504	0.6645	-1.4439	0.155132	2.42338	0.0171564	-0.1775	0.859594	-0.806217	0.42245	-3.04965	0.00347252
ADRA1A	0.614197	0.540523	-0.0902494	0.928457	-2.79175	0.00627035	-1.62014	0.109399	1.9298	0.0570892	1.7088	0.0929293
ADRA1B	2.62516	0.0100634	1.52523	0.13363	-0.710955	0.478751	0.397529	0.692107	-0.916044	0.36233	0.281483	0.779359
ADRA1D	2.82529	0.00573536	0.535505	0.594723	3.08953	0.00258988	0.70289	0.484301	3.58113	0.000578554	1.47243	0.146404
ADRA2A	3.93297	0.000157593	2.03229	0.0475632	2.99979	0.00340264	1.94003	0.0561357	-0.544237	0.587755	-0.251109	0.802633
ADRA2B	2.76952	0.00672733	-1.68678	0.0980024	1.05357	0.294592	-1.0618	0.291734	0.906723	0.36721	-0.588104	0.558785
ADRA2C	1.64785	0.102618	1.43432	0.157834	1.97806	0.0506456	1.27191	0.207333	2.37747	0.0197593	2.72841	0.00844682
ADRB1	1.17799	0.241681	-1.03106	0.307576	0.597151	0.551743	-0.674769	0.501897	1.47154	0.144973	-0.338117	0.736518
ADRB2	-3.10931	0.00246173	-4.52737	3.82761e-05	-2.82045	0.00577357	-3.1708	0.00220229	-8.46214	8.45517e-13	-7.12438	1.9743e-09
ADRB3	0.424089	0.67244	-0.907541	0.368563	1.43497	0.154386	0.630769	0.530109	1.17474	0.243501	1.47425	0.145917
ADRBK1	0.773332	0.441207	0.145428	0.88497	3.02065	0.00319504	2.41447	0.0181964	-2.06696	0.0418929	-2.18716	0.0328484
ADRBK2	-5.54284	2.56029e-07	-6.18631	1.20748e-07	-5.90091	4.85553e-08	-6.92409	1.28801e-09	-4.32864	4.20981e-05	-4.90704	8.09611e-06
ADRM1	3.71492	0.000339744	0.899748	0.372655	3.98308	0.000128489	2.00241	0.0488558	2.21964	0.0292041	-0.216307	0.829521
ADSL	-0.0087667	0.993023	0.419959	0.676351	2.65212	0.0092898	-0.395282	0.693757	3.65103	0.000458535	2.60674	0.0116453
ADSS	0.722423	0.471773	0.466294	0.643071	0.273193	0.785263	-2.58399	0.0117108	3.12041	0.00249331	1.31445	0.193959
ADSSL1	-0.588204	0.557762	-0.794091	0.430972	0.848254	0.398303	-0.426346	0.671077	-2.45647	0.0161416	-3.71417	0.000465732
AEBP1	3.18849	0.0019258	5.6649	7.65083e-07	-0.249572	0.803425	0.172047	0.863864	-2.59105	0.0113231	1.19262	0.237961
AEBP2	-0.159194	0.873847	-0.701949	0.486032	0.502201	0.616619	-2.51296	0.0141195	0.768849	0.444192	-0.218737	0.827636
AEN	5.25988	8.60405e-07	2.1074	0.0402241	7.82132	5.22421e-12	3.8715	0.000229199	8.08575	4.72503e-12	4.85382	9.7914e-06
AES	1.88979	0.0617722	-1.06596	0.291668	0.640283	0.523438	-3.08502	0.00284979	-0.176738	0.86015	-3.32417	0.00155432
AFAP1	-3.71574	0.000338781	-0.787074	0.435029	-4.60273	1.2156e-05	-4.38225	3.76413e-05	-1.32313	0.189469	-0.935797	0.353326
AFAP1-AS	-0.201886	0.840428	0.124839	0.901162	-0.971337	0.333701	1.51442	0.134124	1.32034	0.190395	1.81533	0.0747346
AFAP1L1	2.73423	0.00743343	2.58602	0.0127327	0.202151	0.840205	0.51639	0.607102	-1.75462	0.0830606	-1.26076	0.212533
AFAP1L2	1.58346	0.116572	1.46437	0.149479	-2.46192	0.0155132	-3.67308	0.000446914	-4.71644	9.72515e-06	-3.331	0.0015228
AFF1	1.42575	0.157151	2.32458	0.0242819	-0.872851	0.384815	-0.862089	0.391387	-2.31439	0.0231483	-1.34833	0.182885
AFF2	2.29232	0.024048	3.00076	0.00422694	1.07495	0.284958	1.84472	0.0690271	1.62765	0.107436	2.39259	0.0200481
AFF3	-4.49028	1.96191e-05	-4.47618	4.53763e-05	-4.37649	2.94435e-05	-2.88278	0.00514004	-4.41241	3.08492e-05	-4.83368	1.05199e-05
AFF4	-0.00187535	0.998508	-1.71476	0.0927077	0.16882	0.866276	-3.30354	0.00146514	-2.32241	0.0226905	-3.86175	0.000290024
AFG3L1P	-1.51029	0.134219	-0.588016	0.559222	0.188567	0.85081	1.49858	0.138181	0.62212	0.535589	0.751637	0.455362
AFG3L2	-1.4897	0.139547	0.195671	0.845677	-0.930334	0.354417	0.255127	0.799324	-0.636143	0.526455	-0.102502	0.918718
AFM	0.15496	0.877175	-0.672528	0.504407	0.80728	0.421402	0.571679	0.569249	1.44318	0.152778	0.834219	0.40764
AFP	1.49003	0.13946	-0.633796	0.529162	1.48309	0.141165	0.187035	0.852138	1.98064	0.0509839	1.10199	0.275099
AFTPH	-1.59099	0.114866	-2.80911	0.00711672	-0.379013	0.705474	-2.80109	0.00647521	-2.70463	0.00831353	-4.10283	0.00013129
AGA	2.91648	0.00439793	4.5664	3.36043e-05	1.90277	0.0599192	0.543978	0.58807	1.07933	0.283606	0.0968392	0.923194
AGAP1	-4.59607	1.29724e-05	-1.61134	0.113529	-4.30898	3.81426e-05	-2.62369	0.0105328	-2.40968	0.0182054	1.71758	0.091303
AGAP11	0.275795	0.783292	0.0830903	0.934118	-1.8165	0.0722603	0.25728	0.797667	-4.33149	4.16565e-05	-2.19947	0.0319154
AGAP2	-4.73734	7.40373e-06	-4.88065	1.16346e-05	-2.69655	0.00821004	-3.18293	0.00212266	-4.41666	3.03639e-05	-2.90928	0.0051574
AGAP3	-2.06345	0.0417413	-1.29492	0.201417	-1.18827	0.237516	-0.588343	0.558069	-2.86554	0.00528711	-0.917274	0.362864
AGAP8	0.604308	0.54705	-0.124555	0.901386	1.45622	0.148434	0.331295	0.741346	2.01491	0.0471905	1.56888	0.122211
AGBL1	0.299067	0.765529	-1.12717	0.26516	1.07755	0.283803	0.548111	0.585243	1.00685	0.316971	-0.353685	0.72488
AGBL2	2.74002	0.00731312	0.995902	0.32419	4.81989	5.07696e-06	2.56513	0.0123111	-0.0158523	0.987391	-1.04079	0.302367
AGBL3	-3.04692	0.00297839	-1.72017	0.0917131	-2.84455	0.0053847	-1.3968	0.166593	-3.40468	0.00102758	-1.65468	0.103487
AGBL4	-1.47571	0.143261	-4.95074	9.15814e-06	2.50935	0.013685	-0.177317	0.859738	-5.69757	1.84643e-07	-8.16517	3.65658e-11
AGBL5	-1.78617	0.077197	-0.557843	0.579492	3.28618	0.00139716	2.99483	0.00371893	3.53233	0.000679404	3.59431	0.000679529
AGER	-0.412223	0.681086	0.138921	0.890082	-1.69024	0.0940654	-0.329453	0.742732	0.0819283	0.934903	0.834164	0.407671
AGFG1	-2.71097	0.00793525	-0.618022	0.539423	-3.65967	0.00040366	-2.619	0.010666	-3.01987	0.00337066	-2.24994	0.0283301
AGFG2	1.47383	0.143765	0.678705	0.500518	3.71066	0.000338414	3.1751	0.00217373	-2.52551	0.0134786	-1.6019	0.114707
AGGF1	0.805759	0.422353	-0.02168	0.982791	1.63088	0.106031	-1.20372	0.232484	0.701656	0.484881	-1.70202	0.0942009
AGK	-0.538759	0.591287	0.472506	0.638663	0.459906	0.646572	0.796454	0.428282	-0.195532	0.84546	0.850055	0.398851
AGL	-0.995806	0.321822	0.309443	0.758297	-2.70939	0.00791998	-1.59313	0.115338	-1.61457	0.110245	-0.121331	0.903856
AGMAT	3.05339	0.00292044	0.115349	0.90864	3.85403	0.0002044	2.21245	0.0299789	2.41818	0.0178137	0.66757	0.507102
AGPAT1	-0.791889	0.430357	-0.594852	0.55468	1.40379	0.163448	-0.273788	0.785	-0.474853	0.636154	-0.481434	0.632051
AGPAT2	2.38956	0.0188017	3.71262	0.000524908	1.4159	0.15988	1.80956	0.0743705	0.26423	0.792266	-0.610511	0.54395
AGPAT3	1.53	0.12927	2.96206	0.00470304	-2.00921	0.0471828	0.148304	0.882501	0.136582	0.891696	2.08492	0.0415671
AGPAT4	-5.55147	2.4663e-07	-3.90929	0.00028447	-7.03226	2.46384e-10	-5.51446	4.7509e-07	-6.67821	2.67926e-09	-5.65764	5.19384e-07
AGPAT5	-2.47179	0.0151862	0.331609	0.741599	-1.10365	0.272369	0.821547	0.413939	2.36778	0.0202496	4.17334	0.000103699
AGPAT6	-6.82179	7.74468e-10	-2.33831	0.0234966	-5.06823	1.82064e-06	-3.35163	0.00126084	-5.97345	5.73985e-08	-2.51967	0.0145737
AGPAT9	3.0398	0.00304334	2.46812	0.0171206	0.320488	0.74926	-0.0295807	0.97648	-2.25362	0.0268892	-1.88427	0.0646318
AGPS	-2.85325	0.00529011	-3.32622	0.00167433	-0.974516	0.332129	-2.42375	0.0177719	-2.17519	0.0324954	-3.12936	0.00276071
AGR2	0.563632	0.574305	-1.2225	0.227365	0.644783	0.52053	0.0970566	0.92294	0.979394	0.330266	-0.681452	0.498345
AGR3	0.883461	0.379172	0.200368	0.842022	1.71418	0.0895624	-0.717308	0.475412	1.60486	0.112369	-0.154913	0.877437
AGRP	2.03473	0.0446072	0.00401541	0.996812	0.725639	0.469738	0.77334	0.441752	1.51811	0.132832	1.04844	0.29886
AGT	0.813129	0.418136	1.66643	0.102008	-3.8448	0.000211222	-3.09422	0.00277272	-0.364171	0.716668	-1.86551	0.0672596
AGTPBP1	-0.994877	0.322272	-2.84479	0.00646818	2.1795	0.0316185	-2.73032	0.0078816	1.42088	0.159142	-1.49737	0.139815
AGTR1	-0.198338	0.843195	-0.632414	0.530056	-3.39228	0.000990864	-2.69057	0.0087891	-1.1185	0.266619	-0.313388	0.75513
AGTR2	-1.81341	0.0728613	-0.78602	0.435641	-1.399	0.164876	-1.17738	0.242766	-0.397698	0.691886	-1.67023	0.100356
AGTRAP	4.80397	5.66466e-06	4.31994	7.59614e-05	3.19233	0.00188178	0.875839	0.383914	0.989355	0.3254	-0.731179	0.467665
AGXT	1.14421	0.255352	0.589181	0.558447	1.42013	0.158651	2.51434	0.0140688	1.75026	0.0838148	2.3819	0.0205839
AGXT2	1.19613	0.234561	-0.585804	0.560696	2.17029	0.032329	1.84776	0.0685804	2.0749	0.0411313	1.04763	0.299231
AGXT2L1	0.682939	0.496274	-0.445752	0.65774	0.718781	0.473935	1.44292	0.153206	1.32142	0.190038	0.589606	0.557785
AGXT2L2	1.71558	0.0894308	2.06126	0.0446046	1.52219	0.131086	0.453167	0.651737	-0.914317	0.363231	-1.13471	0.261247
AHCTF1	-0.227562	0.820466	0.952191	0.345674	-1.49398	0.138299	-0.587749	0.558466	0.934159	0.352965	3.23168	0.00204661
AHCY	2.36763	0.0198871	3.8392	0.000354439	4.31344	3.74988e-05	3.17705	0.00216095	9.42533	1.027e-14	11.396	2.52078e-16
AHCYL1	1.91363	0.0586155	1.70019	0.0954342	0.994213	0.322495	0.30548	0.760847	0.0598198	0.952445	-0.309225	0.758278
AHCYL2	-2.54315	0.0125667	-2.09672	0.0412026	-2.13067	0.0355444	-0.722615	0.472164	-7.16401	3.07861e-10	-6.1511	8.12535e-08
AHDC1	-0.934749	0.352239	-2.45392	0.0177323	-0.0772097	0.93861	-1.6877	0.0956242	-5.57808	3.04306e-07	-5.59548	6.54589e-07
AHI1	-4.00361	0.000122153	-4.5084	4.07706e-05	-4.57182	1.37385e-05	-4.93541	4.69845e-06	-9.03775	6.05398e-14	-8.11903	4.3609e-11
AHNAK	4.48187	2.027e-05	4.63411	2.67879e-05	1.26148	0.210042	-0.220166	0.82634	-1.44812	0.151398	-2.00788	0.0494042
AHNAK2	1.52711	0.129989	2.08184	0.0426018	0.568756	0.570785	0.355382	0.723301	-2.84696	0.00557568	-0.942886	0.349719
AHR	3.56058	0.000575251	4.13975	0.000136454	-0.358125	0.720997	-1.81009	0.0742881	-5.56233	3.24925e-07	-4.80126	1.18055e-05
AHRR	3.02481	0.00318432	0.149792	0.881544	1.85798	0.0660848	0.991936	0.324418	2.16769	0.0330816	0.616418	0.540073
AHSA1	1.88009	0.0630959	2.07706	0.0430605	4.03858	0.00010492	2.01956	0.0470019	3.70795	0.000378684	2.11467	0.0388427
AHSA2	-0.0486461	0.961301	1.64466	0.106442	-2.51029	0.0136506	-0.281015	0.779473	-2.0974	0.039038	0.86206	0.392267
AHSG	2.54273	0.012581	-0.771218	0.444281	3.57032	0.00054766	2.34271	0.0217987	2.37971	0.0196478	0.321147	0.749274
AHSP	1.54207	0.126312	0.646054	0.521259	1.07758	0.28379	0.645727	0.520427	1.63555	0.105766	0.0528854	0.958008
AICDA	1.85905	0.0660516	-0.911012	0.366749	2.90005	0.00457857	0.964285	0.338002	2.43916	0.0168796	-0.881894	0.381538
AIDA	-0.976552	0.33122	0.533514	0.59609	-1.47727	0.142713	-0.968298	0.336008	-3.33019	0.00130244	-1.89651	0.062965
AIF1	3.68613	0.00037522	2.70687	0.00932274	2.09341	0.038817	-1.15051	0.253589	-4.49765	2.24095e-05	-5.91078	2.01286e-07
AIF1L	1.52022	0.131708	1.54361	0.129117	0.107167	0.914869	-0.665372	0.507854	1.76452	0.0813685	-0.101365	0.919616
AIFM1	-0.99714	0.321178	2.61536	0.0118134	-1.00921	0.315283	2.33073	0.0224584	-0.58988	0.556893	1.40165	0.166443
AIFM2	1.53846	0.127191	0.366162	0.715821	-1.48259	0.141296	1.78984	0.077516	-3.29468	0.00145652	-1.60118	0.114866
AIFM3	2.58178	0.0113251	0.476438	0.63588	2.48041	0.0147759	1.85842	0.067033	3.38801	0.00108389	1.59609	0.115998
AIG1	-0.916538	0.361658	-0.463807	0.64484	-0.833875	0.406319	-2.06681	0.0422043	-2.37454	0.0199065	-2.37056	0.0211663
AIM1L	3.61088	0.00048531	-0.515439	0.608564	4.27616	4.32183e-05	2.31699	0.0232364	3.04095	0.00316582	-0.932633	0.354943
AIM2	3.77061	0.000279966	2.04705	0.0460353	5.1343	1.37951e-06	2.15348	0.0344951	0.0440638	0.964961	-1.26345	0.211571
AIMP1	2.79557	0.00624589	2.73901	0.00856936	3.64169	0.000429392	1.59827	0.114187	6.40509	8.8919e-09	4.42837	4.35424e-05
AIMP2	-1.07714	0.284089	1.16048	0.251477	1.55797	0.122368	1.64965	0.103197	4.54765	1.85508e-05	3.95157	0.00021644
AIP	1.55871	0.122321	1.86466	0.0682243	2.90613	0.00449735	1.37478	0.173292	2.86846	0.00524301	2.13801	0.0368163
AIPL1	0.652856	0.515393	-0.443778	0.659157	2.20427	0.0297757	2.02952	0.0459532	1.737	0.086142	1.35938	0.17938
AIRE	2.19733	0.0303771	0.031969	0.974627	2.12215	0.0362706	1.95848	0.0538926	2.15723	0.033915	1.66969	0.100463
AJAP1	0.534292	0.594362	0.335502	0.738678	-0.57951	0.563536	0.034274	0.97275	-0.422592	0.673699	-0.157992	0.875022
AK1	-0.00852886	0.993213	-1.93872	0.0583067	2.07484	0.040543	-0.548957	0.584666	-0.613885	0.540991	-4.25569	7.85473e-05
AK2	-2.0269	0.0454167	-1.30443	0.198183	-0.0995261	0.920918	-0.51301	0.609452	-1.88352	0.0631754	-2.05912	0.0440621
AK3	0.125824	0.900132	-1.75614	0.0853129	1.21823	0.225973	-1.51784	0.13326	0.183346	0.854979	-3.88397	0.000269848
AK4	0.655889	0.513449	-0.749569	0.457098	-0.430348	0.66786	-1.33783	0.184994	0.980952	0.329502	-0.45464	0.651095
AK5	-2.6307	0.00991175	-3.81651	0.000380456	-4.6641	9.51998e-06	-4.36268	4.04267e-05	-8.03499	5.9567e-12	-8.68025	5.15969e-12
AK7	0.812359	0.418575	0.60115	0.550511	3.35416	0.001122	2.52807	0.0135726	-0.979154	0.330384	-2.53096	0.0141595
AKAP1	-0.598781	0.550715	1.01973	0.312865	2.53831	0.0126661	2.26058	0.0266862	4.1287	8.72441e-05	5.65734	5.19962e-07
AKAP10	-0.959331	0.339777	-1.79171	0.0793561	-0.599204	0.550379	-3.86582	0.000233693	-1.40417	0.164043	-3.61762	0.000631703
AKAP11	-0.784622	0.434587	-1.88352	0.0655716	-2.58627	0.0111277	-3.17829	0.0021528	-3.02814	0.00328888	-3.0801	0.00318242
AKAP12	-0.769863	0.443252	1.53223	0.131897	-5.73159	1.03618e-07	-4.129	9.35882e-05	-4.44784	2.70224e-05	-0.144144	0.885895
AKAP13	1.67955	0.0962623	3.58741	0.000769485	-3.83877	0.000215793	-2.40394	0.0186896	-1.2868	0.201783	-0.111618	0.911519
AKAP14	-0.517263	0.60615	-0.485009	0.629831	0.847418	0.398766	0.677421	0.500223	1.84629	0.0684577	1.0945	0.278341
AKAP3	1.1234	0.264039	-1.2878	0.203863	1.89524	0.0609196	0.853112	0.396314	-0.429827	0.668449	-3.347	0.00145129
AKAP4	-0.688031	0.493075	-2.00245	0.0507868	0.576472	0.565579	0.278289	0.781557	0.153612	0.878293	-0.932524	0.354999
AKAP5	1.45022	0.150223	0.658918	0.513033	4.8001	5.50254e-06	2.12763	0.0366542	2.53776	0.0130497	-1.19339	0.237658
AKAP6	0.336746	0.737036	-1.41863	0.162337	0.476229	0.63494	-1.01525	0.313249	-1.0738	0.286061	-2.36698	0.0213528
AKAP7	-2.44192	0.0164206	-1.88105	0.065914	-6.54186	2.53783e-09	-3.45448	0.00091042	-6.85864	1.20444e-09	-4.6669	1.89811e-05
AKAP8	0.322177	0.748012	2.11293	0.0397248	0.738225	0.46209	0.622254	0.535662	1.55767	0.123163	1.68155	0.0981287
AKAP8L	0.35347	0.724503	-0.337862	0.73691	1.84217	0.0683834	-0.191108	0.848957	1.43706	0.154505	-0.060948	0.951614
AKAP9	-2.89306	0.00471082	-1.20375	0.234468	-1.43505	0.154363	-1.59013	0.116011	-2.01603	0.047071	-1.47675	0.145247
AKD1	-2.42068	0.0173519	-3.67099	0.000596497	-1.98421	0.049946	-5.0339	3.20573e-06	-1.17697	0.242612	-3.95917	0.000211115
AKIRIN1	3.97143	0.000137232	-1.93656	0.0585773	4.82078	5.05864e-06	0.79386	0.429782	0.0110781	0.991188	-4.88608	8.7265e-06
AKIRIN2	-2.70285	0.00811737	-2.63415	0.0112571	-2.61772	0.0102124	-4.44552	2.98507e-05	-3.33139	0.00129751	-5.45047	1.12031e-06
AKNA	2.61772	0.0102704	1.57631	0.121389	2.13655	0.0350503	1.55761	0.123535	-1.54144	0.127061	-2.33737	0.0229553
AKNAD1	1.40491	0.163242	-1.2248	0.226504	2.37023	0.019676	-0.647976	0.518979	1.91777	0.0586214	0.334458	0.739262
AKR1A1	1.32281	0.189008	-0.0801017	0.936483	2.10285	0.0379643	-0.0328438	0.973886	4.08787	0.000101004	2.95132	0.00458638
AKR1B1	1.54703	0.125113	-0.925104	0.359446	2.75252	0.00701237	-0.270647	0.787406	1.23922	0.218798	-0.143818	0.886151
AKR1B15	1.57619	0.118238	0.312419	0.756047	2.28811	0.0242149	0.984862	0.327858	1.72643	0.0880361	0.339397	0.735558
AKR1C1	-3.5132	0.000674204	-2.98599	0.00440309	-5.17258	1.17366e-06	-3.3674	0.00119992	-5.28942	9.99406e-07	-5.42124	1.2479e-06
AKR1C2	-2.01131	0.0470677	-2.69776	0.00954712	-4.61712	1.14809e-05	-4.05499	0.000121458	-6.44335	7.52281e-09	-5.6396	5.55502e-07
AKR1C3	2.08672	0.039536	2.79797	0.00733113	-0.792963	0.429658	0.355427	0.723267	-0.259311	0.796045	-0.522945	0.60304
AKR1C4	0.860009	0.391905	-0.715763	0.477535	1.1387	0.25752	0.892463	0.374999	1.68639	0.0955228	-0.0049848	0.99604
AKR1D1	0.453412	0.651265	-0.916329	0.363982	1.54624	0.125175	0.271903	0.786444	1.42373	0.158319	-1.09594	0.277716
AKR1E2	-3.56024	0.000575905	-0.287554	0.774901	-2.90103	0.00456535	-0.662447	0.509715	-1.80283	0.0750886	0.00730763	0.994195
AKR7A2	1.64475	0.103258	-1.39668	0.168805	2.40135	0.0181635	0.29167	0.771344	0.598046	0.551457	-1.51684	0.134833
AKR7A3	0.655735	0.513547	-2.7435	0.00846867	-0.38689	0.699652	0.0863062	0.931453	0.0414186	0.967063	-3.60829	0.000650457
AKR7L	-0.749699	0.455251	-0.616621	0.540339	0.299919	0.764855	0.266114	0.790881	-1.15571	0.251157	-0.0700418	0.944406
AKT1	-0.928805	0.355296	0.129316	0.897637	0.673028	0.502466	-0.489919	0.625621	0.232061	0.817069	-0.210788	0.833804
AKT1S1	2.71072	0.00794077	1.46434	0.149487	3.53726	0.000612339	1.16933	0.245974	3.36909	0.00115129	1.93262	0.058257
AKT2	1.98112	0.050409	3.52162	0.000938462	4.81046	5.27561e-06	3.97103	0.000162742	4.37487	3.54747e-05	5.07886	4.36176e-06
AKT3	-1.41455	0.160401	-1.45492	0.152069	0.127592	0.898726	-2.63221	0.0102944	-0.668431	0.505736	-3.03724	0.00359766
AKTIP	0.0997434	0.920754	-1.20976	0.232176	-0.708554	0.480233	-0.892809	0.374815	-2.12942	0.0362187	-3.32494	0.00155074
ALAD	-0.0358947	0.97144	0.431313	0.668132	-2.11597	0.0368056	-1.82038	0.0726912	-3.76445	0.00031263	-2.50812	0.0150086
ALAS1	-0.457175	0.648568	-0.181382	0.856816	-1.63565	0.105026	-1.00761	0.316879	-0.745478	0.458115	-0.445342	0.657759
ALAS2	2.24402	0.0271049	2.15338	0.0362364	3.1597	0.00208417	0.71722	0.475466	3.83516	0.000245348	1.66427	0.101548
ALB	1.06558	0.289258	0.739854	0.462919	1.91263	0.0586289	0.826064	0.411388	1.92604	0.0575653	0.48542	0.629239
ALCAM	-3.45201	0.000825902	-6.46687	4.44484e-08	-1.3831	0.169685	-3.1355	0.00245	-6.33688	1.19713e-08	-9.02724	1.39364e-12
ALDH16A1	2.63361	0.00983291	2.12333	0.0388014	2.92276	0.00428191	1.82637	0.0717735	3.81514	0.000262842	2.90098	0.00527763
ALDH18A1	1.34593	0.181462	2.56781	0.0133357	2.83905	0.0054712	1.03279	0.305023	7.83179	1.50333e-11	6.94013	4.00316e-09
ALDH1A1	3.45494	0.000817963	3.6422	0.000651386	-0.312156	0.755566	-1.71749	0.0900158	-4.91005	4.57063e-06	-4.73157	1.51122e-05
ALDH1A2	2.47729	0.0149681	2.13211	0.0380361	3.58779	0.000516158	4.03079	0.000132191	1.37247	0.173661	2.02832	0.0472102
ALDH1A3	5.03538	2.20063e-06	4.59655	3.03816e-05	0.380883	0.70409	-1.30913	0.194488	-3.1291	0.00242846	-0.931543	0.355501
ALDH1B1	0.539552	0.590742	3.41614	0.00128533	3.14153	0.00220547	2.66268	0.0094815	5.20252	1.42212e-06	5.78225	3.26078e-07
ALDH1L1	1.16353	0.247469	0.939046	0.352313	0.984294	0.327323	1.45668	0.149379	1.64185	0.104452	1.03931	0.303049
ALDH2	0.960253	0.339315	0.749051	0.457408	0.720862	0.47266	-0.94071	0.349873	-1.04963	0.296972	-2.5991	0.0118789
ALDH3A1	1.29781	0.197431	-0.700864	0.486703	0.871075	0.385779	0.354514	0.723949	2.10151	0.0386655	0.189878	0.850079
ALDH3A2	-5.45834	3.68872e-07	-3.8848	0.000307248	-7.52175	2.28441e-11	-7.68257	4.78459e-11	-7.08042	4.4777e-10	-6.72786	9.02739e-09
ALDH3B1	3.31814	0.00127688	4.07946	0.000165646	1.69139	0.0938468	-0.00726778	0.99422	1.68001	0.0967608	0.927794	0.357427
ALDH3B2	0.470626	0.638964	-0.552701	0.582981	1.27067	0.206767	0.925454	0.357698	1.19756	0.234537	1.19717	0.236195
ALDH5A1	-0.435448	0.664205	1.688	0.0977675	-5.038	2.06578e-06	-0.466679	0.642082	-0.493688	0.622846	1.73467	0.0882041
ALDH6A1	2.36993	0.0197704	1.5049	0.138768	3.12452	0.00232497	0.364669	0.716385	1.93889	0.0559545	0.383729	0.702607
ALDH7A1	-0.854072	0.39517	-0.859692	0.394145	1.69303	0.0935319	-1.06131	0.291956	2.88559	0.00499119	0.644813	0.521635
ALDH8A1	-2.94996	0.00398365	-1.70061	0.0953549	-3.93856	0.000150969	-2.06448	0.0424297	-2.27639	0.0254293	-2.32863	0.0234487
ALDH9A1	1.42429	0.157573	-0.143598	0.886407	0.365517	0.71549	0.613035	0.541708	-1.82389	0.0718124	1.40298	0.166048
ALDOA	2.17617	0.031971	-2.1716	0.0347554	2.59446	0.0108826	0.775703	0.440363	3.94136	0.000169645	0.265559	0.791537
ALDOB	1.73616	0.0857109	0.759358	0.451276	2.71886	0.00771197	1.95552	0.0542467	1.71156	0.0907582	0.615935	0.540389
ALDOC	-0.80849	0.420787	-3.03951	0.00379573	-2.2751	0.0250129	-4.22925	6.54808e-05	-6.24447	1.78832e-08	-5.80958	2.94338e-07
ALG1	2.4803	0.0148501	1.39849	0.168263	3.53336	0.000620424	0.918642	0.361228	1.98737	0.0502197	-0.0599617	0.952396
ALG10	-0.246809	0.805578	0.494885	0.622893	1.34421	0.181891	0.517167	0.606562	3.37385	0.00113397	3.51611	0.000866478
ALG11	-2.44805	0.0161604	-0.800493	0.427289	0.0128054	0.989808	-1.26918	0.2083	-1.17432	0.243666	-1.39959	0.167054
ALG12	-2.05387	0.0426789	0.372715	0.710968	0.0696911	0.944577	0.015764	0.987465	-0.290576	0.772109	0.975587	0.333392
ALG13	5.13399	1.46057e-06	4.6364	2.65824e-05	4.58306	1.31414e-05	2.93713	0.0043976	3.15338	0.00225547	5.54432	7.91538e-07
ALG14	-1.63342	0.105622	-1.77108	0.0827677	-1.25372	0.21284	-3.59714	0.000573917	-1.2457	0.216422	-2.01728	0.0483838
ALG1L	0.0697551	0.944532	0.171562	0.864488	0.914508	0.362628	0.812525	0.419062	-0.370749	0.711781	0.601515	0.549882
ALG2	3.10714	0.00247824	2.4987	0.0158671	3.90477	0.000170495	0.519724	0.604787	1.46191	0.147587	-0.021352	0.983039
ALG3	3.88714	0.000185633	2.85795	0.00624324	5.2803	7.42323e-07	2.86245	0.00544617	7.60056	4.29624e-11	6.86134	5.41448e-09
ALG5	0.204501	0.838391	-0.995276	0.324492	1.74361	0.0842695	-0.747967	0.456819	2.80754	0.00623647	-0.76714	0.446164
ALG6	-0.963596	0.337644	0.305062	0.761611	-1.20094	0.232585	-0.510588	0.611139	-1.33895	0.184287	-1.01071	0.316429
ALG8	-0.45514	0.650026	1.89605	0.0638583	0.332737	0.740022	-0.0480473	0.961806	2.88787	0.00495851	3.68354	0.000513235
ALG9	-5.52645	2.74881e-07	-2.38192	0.0211495	-4.96265	2.82524e-06	-3.99987	0.00014724	0.0684416	0.945601	1.20761	0.232183
ALK	1.48564	0.140618	1.10237	0.275686	5.20401	1.02731e-06	4.47097	2.71803e-05	3.92322	0.000180757	5.46818	1.04934e-06
ALKBH1	0.245088	0.806906	-0.771495	0.444118	4.23235	5.1018e-05	0.540771	0.590268	1.74715	0.0843548	-1.15585	0.252563
ALKBH2	-0.892631	0.374264	2.95499	0.00479521	1.1945	0.235078	1.38174	0.171155	7.86345	1.30159e-11	9.18042	7.84429e-13
ALKBH3	1.29054	0.199932	-0.309894	0.757956	2.64162	0.00956304	0.949502	0.345415	0.957166	0.341297	-0.725244	0.47127
ALKBH4	0.213249	0.83158	-1.31992	0.192994	3.0124	0.00327566	0.64257	0.522462	1.2685	0.20821	-1.0485	0.298836
ALKBH5	-1.47053	0.144655	-0.998141	0.323115	-2.96592	0.00376637	-2.03274	0.0456188	-3.30835	0.00139529	-3.12205	0.00281985
ALKBH6	3.47278	0.000771128	3.66113	0.00061478	5.21064	9.98811e-07	3.73834	0.000359587	1.66274	0.100183	2.07034	0.0429614
ALKBH7	2.27727	0.0249661	1.85683	0.0693519	2.42679	0.0170048	-1.06601	0.289837	3.98714	0.000144441	3.58889	0.000691142
ALKBH8	-2.8884	0.00477554	-0.424914	0.672759	-4.57462	1.35876e-05	-4.24035	6.29262e-05	2.56403	0.0121708	2.9443	0.00467747
ALLC	2.27771	0.0249393	-0.517009	0.607476	2.50921	0.0136902	0.261029	0.794785	0.54545	0.586925	-1.57822	0.120048
ALMS1	-2.21101	0.0293844	-0.822284	0.414899	1.55199	0.123793	0.770971	0.443146	1.46916	0.145615	1.19492	0.237066
ALMS1P	-4.50896	1.82443e-05	-2.14205	0.0371857	-3.46823	0.000771343	-0.788258	0.43303	-5.46189	4.92664e-07	-1.32569	0.190232
ALOX12	0.700522	0.485278	-1.10901	0.27284	-0.364965	0.7159	0.301905	0.76356	0.909751	0.36562	0.204193	0.83893
ALOX12B	3.11303	0.00243375	0.194918	0.846263	3.05087	0.00291496	1.88954	0.0626846	3.42887	0.000950785	1.55303	0.125952
ALOX15	1.49768	0.137462	-0.788203	0.434375	2.13582	0.0351109	2.22474	0.0291064	1.72528	0.0882447	0.646348	0.520648
ALOX15B	0.962234	0.338325	-1.26633	0.211381	1.66144	0.0997262	0.393423	0.695123	0.366006	0.715303	-0.324775	0.74654
ALOX5	3.41116	0.000944488	4.203	0.000111215	3.95092	0.00014438	1.19015	0.237742	-3.75543	0.000322385	-3.41127	0.00119489
ALOX5AP	2.85274	0.00529804	4.86144	1.24212e-05	2.70764	0.00795897	0.992364	0.324211	-6.62879	3.33208e-09	-4.76073	1.36309e-05
ALOXE3	0.5028	0.616245	-1.17107	0.247232	0.833539	0.406508	-0.257585	0.797433	1.68794	0.095222	1.20826	0.231937
ALPI	2.06422	0.0416663	-0.220841	0.826134	2.23302	0.0277544	1.58933	0.116192	2.02393	0.0462335	1.50499	0.137847
ALPK1	3.83532	0.000223064	5.2566	3.19079e-06	0.853782	0.395246	-0.598405	0.551373	-4.48009	2.3941e-05	-3.87652	0.000276457
ALPK2	2.43459	0.0167369	2.75595	0.0081951	4.04806	0.000101334	1.2809	0.204175	2.12505	0.0365929	0.946731	0.347772
ALPK3	-0.135581	0.892433	-1.43481	0.157692	-1.72902	0.0868604	1.32868	0.187981	-3.52549	0.000694783	-2.12611	0.0378374
ALPL	2.31013	0.0230006	3.98746	0.000222158	2.64069	0.00958774	4.8491	6.55019e-06	1.30164	0.196685	1.00694	0.318218
ALPP	0.549317	0.584051	-0.0192085	0.984753	0.00358642	0.997146	1.73808	0.0863016	0.340231	0.734553	0.956908	0.342655
ALPPL2	2.83102	0.00564148	-0.396857	0.693196	3.47512	0.000753873	0.803402	0.424281	2.5392	0.0129999	0.804538	0.424429
ALS2	-4.2708	4.54571e-05	-1.17761	0.24464	-5.60988	1.77563e-07	-2.34429	0.0217131	-5.50038	4.20183e-07	-2.09186	0.0409167
ALS2CL	-3.58521	0.000529403	-3.48172	0.0010576	-6.03428	2.65449e-08	-1.18479	0.239843	-8.78758	1.90463e-13	-4.19721	9.57001e-05
ALS2CR11	1.30509	0.194951	-0.919726	0.362222	2.88719	0.00475477	2.02123	0.0468253	-0.549399	0.584225	-1.74795	0.0858579
ALS2CR12	-4.08158	9.19145e-05	-1.54013	0.129962	-5.36026	5.26709e-07	-2.5639	0.0123512	-9.64109	3.83195e-15	-4.73487	1.49367e-05
ALS2CR4	-2.48853	0.0145313	-0.619655	0.538356	0.880261	0.380808	0.310126	0.757325	2.26647	0.0260566	1.65884	0.102641
ALS2CR8	-0.337977	0.736111	-1.97341	0.0541023	-0.270741	0.787143	-1.77868	0.0793448	-1.82626	0.071451	-4.60892	2.32617e-05
ALX1	1.32178	0.189349	3.59405	0.000754153	2.05858	0.0421085	2.72041	0.00809951	1.84328	0.0689015	3.238	0.00200877
ALX3	3.65508	0.000417411	0.465922	0.643336	5.47219	3.24429e-07	3.57713	0.000612694	3.43364	0.000936296	2.68044	0.00959682
ALX4	2.89425	0.00469442	-0.0736675	0.941575	2.57974	0.0113267	0.792114	0.430793	2.68956	0.00866583	2.18236	0.033219
AMAC1	0.0123758	0.990151	-1.94655	0.0573338	0.713841	0.476972	0.27474	0.784271	0.86992	0.386884	-0.655463	0.514807
AMACR	-4.64726	1.05984e-05	-0.969655	0.336981	-7.58099	1.70823e-11	-4.02565	0.000134586	-5.17039	1.61916e-06	-1.58571	0.118338
AMBN	-0.0866749	0.931109	0.292067	0.771469	0.976287	0.331255	1.77334	0.0802313	1.23662	0.219758	0.353709	0.724862
AMBP	1.06433	0.289824	-0.871262	0.38786	2.61632	0.0102517	2.09131	0.0398868	1.96759	0.052496	1.22487	0.225663
AMBRA1	-2.55317	0.0122334	-1.33399	0.188376	0.668765	0.505171	1.81927	0.0728619	-3.21918	0.00184269	-1.76039	0.0837066
AMD1	0.973402	0.332775	2.07655	0.0431097	1.48227	0.141382	-1.13664	0.259309	3.43665	0.000927254	2.52791	0.0142701
AMDHD1	0.867553	0.38778	-0.153484	0.878647	0.496066	0.620926	1.448	0.151783	-0.33755	0.736565	-0.691382	0.492132
AMDHD2	1.99295	0.0490767	1.04485	0.301218	1.30627	0.194429	0.1743	0.862099	0.0351657	0.972033	-0.124775	0.901141
AMELX	1.29226	0.199337	-0.485352	0.62959	1.49892	0.137012	1.1843	0.240034	1.58396	0.117052	0.315227	0.753741
AMELY	0.327579	0.743936	0.291603	0.771821	2.00372	0.0477783	1.0073	0.31703	1.92584	0.0575906	0.00482269	0.996169
AMFR	1.08314	0.281433	-0.340151	0.735196	-0.598031	0.551158	-0.161552	0.872093	-1.93055	0.0569955	-1.99838	0.0504535
AMH	1.19373	0.235493	2.77964	0.00769709	1.43576	0.154159	1.94177	0.0559213	3.74137	0.000338158	4.95742	6.75812e-06
AMHR2	-0.884472	0.378628	-3.66094	0.000615126	1.3065	0.19435	1.68597	0.0959587	-1.92131	0.0581667	-2.43885	0.0178719
AMICA1	1.5292	0.129469	0.582968	0.562588	1.34719	0.180934	-0.304613	0.761504	-8.47436	7.99518e-13	-6.20263	6.6841e-08
AMIGO1	1.24431	0.216382	-1.84757	0.0707063	-0.160474	0.872828	-0.563858	0.574533	-0.859443	0.392602	-1.67913	0.0986006
AMIGO2	-4.73762	7.39544e-06	-5.1779	4.19117e-06	-9.41544	1.74067e-15	-7.3681	1.88434e-10	-14.7461	8.88033e-25	-12.3833	8.45008e-18
AMIGO3	-0.160604	0.872739	0.795808	0.429982	1.03599	0.302682	1.44823	0.151721	2.85621	0.00543026	2.7808	0.0073363
AMMECR1	0.755044	0.452052	1.46856	0.148343	1.33406	0.185184	1.72822	0.0880634	3.76506	0.000311983	2.78653	0.00722328
AMMECR1L	-4.33878	3.51328e-05	-0.560119	0.57795	-5.3365	5.83415e-07	-2.62449	0.0105101	-2.8594	0.00538081	-0.0319193	0.974648
AMN	2.11202	0.0372536	0.0141966	0.988731	2.14479	0.0343676	0.715398	0.476585	2.40472	0.0184372	1.15998	0.250892
AMN1	-1.80169	0.0747006	-5.07788	5.91936e-06	-0.784912	0.434343	-3.81683	0.000276052	-2.58591	0.0114802	-5.41327	1.28513e-06
AMOT	-1.02694	0.307005	-1.98928	0.052268	2.95854	0.00385025	1.68134	0.0968567	-3.05307	0.0030534	-3.59564	0.000676722
AMOTL1	-2.83776	0.0055328	-0.0256565	0.979635	-8.10825	1.25683e-12	-6.6627	3.95386e-09	-0.466265	0.642262	2.44771	0.0174799
AMOTL2	2.76308	0.00685136	3.19203	0.00246767	-0.396111	0.692859	-0.549169	0.584521	3.58192	0.00057704	4.71858	1.58213e-05
AMPD1	3.8412	0.000218484	0.374245	0.709837	3.84133	0.00021384	0.36997	0.712448	3.28057	0.00152239	-0.693196	0.491001
AMPD2	1.14078	0.25677	0.940221	0.351716	-1.33732	0.184124	-0.885674	0.378624	-0.236295	0.813793	0.607289	0.546071
AMPD3	3.30247	0.00134269	2.21041	0.0317771	0.571299	0.569066	0.114818	0.908896	-3.65833	0.00044747	-1.42644	0.159197
AMPH	-3.53415	0.00062862	-3.61571	0.000706138	-4.64471	1.02863e-05	-3.02788	0.00337526	-6.43282	7.87741e-09	-5.99773	1.45075e-07
AMT	-2.21506	0.0290963	-0.538267	0.592829	-1.62123	0.108087	-0.201858	0.840575	-2.02515	0.0461052	-0.520375	0.604818
AMTN	-0.751734	0.454031	0.0955162	0.924294	-0.825524	0.41102	-0.676113	0.501049	-0.804893	0.423209	-1.3554	0.180635
AMY2B	-1.21706	0.226535	-3.49168	0.00102658	-3.39933	0.000968244	-6.0202	5.95782e-08	-3.11508	0.00253386	-4.44216	4.15222e-05
AMZ2	3.61573	0.000477373	1.6534	0.104644	5.06847	1.81879e-06	2.96746	0.00402774	2.87205	0.00518926	0.132519	0.895041
AMZ2P1	1.31689	0.190977	-1.23394	0.223112	0.699183	0.486045	-0.127547	0.898849	-0.249457	0.803631	-1.13056	0.262976
ANAPC1	-1.05048	0.296109	2.25824	0.028418	-0.552904	0.581551	0.322387	0.748056	3.30379	0.00141545	4.57793	2.59229e-05
ANAPC10	3.29831	0.00136069	0.804556	0.424962	3.8975	0.000174998	0.275703	0.783534	3.88704	0.000205032	1.57714	0.120297
ANAPC11	2.37083	0.0197252	0.647248	0.520493	5.16716	1.20088e-06	2.73206	0.00784391	3.53937	0.000663879	2.01933	0.0481648
ANAPC13	2.7876	0.00638976	1.59546	0.117039	2.65014	0.00934076	0.252401	0.801422	2.87852	0.00509365	1.20452	0.233367
ANAPC16	1.20134	0.232545	-0.383912	0.702704	1.66589	0.0988338	0.0693969	0.944858	0.122645	0.902688	-0.456345	0.649876
ANAPC2	0.649838	0.517333	0.739681	0.463023	0.555231	0.579964	-0.308006	0.758932	1.26566	0.209218	0.0373683	0.970322
ANAPC4	3.11468	0.00242138	1.13708	0.261035	2.52886	0.0129907	2.0866	0.0403231	3.60863	0.000528163	1.32726	0.189713
ANAPC5	-3.23613	0.00165804	0.715094	0.477944	-1.95954	0.0528061	-0.0605471	0.951881	-1.26038	0.211106	2.14647	0.0361047
ANG	3.8156	0.000239119	5.42802	1.75624e-06	-0.153744	0.878118	0.731766	0.466592	-0.389488	0.697925	-1.83312	0.0720086
ANGEL1	0.454922	0.650182	2.04504	0.0462414	-0.483694	0.62965	0.300732	0.764451	0.197696	0.843772	1.26128	0.212345
ANGEL2	-0.718399	0.474238	0.491681	0.62514	0.421924	0.673977	0.304377	0.761683	1.8541	0.0673196	1.54413	0.128092
ANGPT1	3.20862	0.00180811	4.06067	0.000175915	0.558483	0.577751	-1.54659	0.126172	1.24454	0.216846	-0.710888	0.480052
ANGPT2	1.74222	0.0846399	4.87761	1.17557e-05	1.75792	0.0817903	2.17723	0.0326092	0.242793	0.808772	1.83346	0.0719575
ANGPT4	1.31416	0.191891	-0.699963	0.487261	2.06961	0.0410415	1.35149	0.180602	1.91274	0.0592726	1.04116	0.302197
ANGPTL1	2.56475	0.0118581	2.72446	0.00890308	-0.521714	0.603011	-2.33333	0.0223133	-3.0557	0.00302949	-1.29614	0.20015
ANGPTL2	2.96192	0.00384467	5.05572	6.38853e-06	-0.38202	0.703249	-1.73659	0.0865653	2.07833	0.0408064	2.97291	0.00431663
ANGPTL3	0.836504	0.404928	1.51605	0.135931	1.3515	0.179554	-0.19387	0.846802	1.81202	0.0736445	0.0118196	0.990611
ANGPTL4	3.33096	0.00122532	3.97975	0.000227663	2.15634	0.0334311	-0.181832	0.856205	2.1448	0.034928	1.32458	0.190595
ANGPTL5	1.20862	0.229747	-1.82584	0.0739715	1.81474	0.0725326	-1.84667	0.0687401	2.37461	0.019903	-0.673715	0.503215
ANGPTL6	0.919236	0.360252	-0.191146	0.849201	0.399447	0.690408	0.606678	0.545897	0.628742	0.531266	0.206856	0.83686
ANGPTL7	2.25043	0.0266803	1.83525	0.0725424	0.138982	0.889741	-0.227148	0.820927	-1.41296	0.161453	-1.12883	0.263699
ANK1	-4.52745	1.69758e-05	-1.83016	0.0733123	-3.30641	0.00130931	-0.555675	0.580087	-6.11737	3.09654e-08	-2.68362	0.00951648
ANK2	-1.46252	0.146831	-0.580624	0.564155	-4.8102	5.28109e-06	-3.87161	0.000229119	-0.735434	0.464173	1.02899	0.307832
ANK3	-4.08215	9.1721e-05	-3.19626	0.00243799	-6.9691	3.33732e-10	-4.15132	8.64695e-05	-4.77624	7.71452e-06	-2.35538	0.0219684
ANKDD1A	-5.27679	8.0098e-07	-4.95192	9.12128e-06	-6.8746	5.24659e-10	-2.65848	0.00959004	-11.1613	3.9659e-18	-6.64851	1.22289e-08
ANKFN1	-7.20445	1.26154e-10	-6.42087	5.23696e-08	-5.84081	6.36156e-08	-6.16579	3.24305e-08	-12.1148	5.86658e-20	-11.8151	5.8753e-17
ANKFY1	-8.30326	6.0601e-13	-5.20316	3.84027e-06	-6.50518	3.01425e-09	-4.61759	1.57569e-05	-9.80913	1.78038e-15	-7.05623	2.56443e-09
ANKH	1.65809	0.10053	1.16011	0.251626	0.92802	0.35561	-2.03689	0.045191	0.0908109	0.927864	-0.736701	0.464326
ANKHD1-EIF4EBP3	1.08439	0.28088	1.50057	0.139883	1.79165	0.0761833	0.482174	0.631087	1.88982	0.0623152	1.83894	0.0711343
ANKK1	1.27553	0.205167	-1.2788	0.206992	1.94707	0.0543033	0.0313919	0.97504	1.46465	0.146839	0.0555511	0.955894
ANKLE1	0.075676	0.939833	-0.574177	0.568475	1.96802	0.0518078	0.666273	0.507281	4.49343	2.27689e-05	1.53953	0.129208
ANKMY1	0.327831	0.743746	0.0519984	0.958741	-1.71443	0.0895163	-0.465123	0.643191	1.97593	0.0515261	2.32495	0.0236589
ANKMY2	1.4874	0.140153	-0.189965	0.850122	1.19544	0.234716	-0.510827	0.610973	-0.515305	0.607726	-3.57586	0.000719809
ANKRA2	-1.85679	0.0663761	-1.57959	0.120635	-3.06756	0.00277027	-4.17688	7.8956e-05	-1.83113	0.0707131	-2.87945	0.00560185
ANKRD1	0.259636	0.795695	0.37458	0.709589	-0.430751	0.667568	0.924691	0.358092	0.275034	0.783982	-1.29349	0.201059
ANKRD10	1.33325	0.185572	-0.521052	0.604677	-0.433954	0.665247	-3.26014	0.00167591	0.0847731	0.932648	-2.32368	0.0237321
ANKRD11	-0.714776	0.476464	0.661656	0.511292	-0.33638	0.737282	0.241613	0.80974	0.135394	0.892632	0.737211	0.464018
ANKRD12	-2.76145	0.00688318	-2.62845	0.0114234	-1.16652	0.246153	-2.08212	0.0407428	-5.66008	2.16076e-07	-5.97121	1.60328e-07
ANKRD13A	-2.24461	0.0270652	-2.19906	0.0326242	-0.120251	0.904523	-1.22368	0.224904	-3.76117	0.000316141	-5.56751	7.26271e-07
ANKRD13B	-4.11075	8.2563e-05	-1.48732	0.143338	-4.49959	1.82536e-05	-3.88113	0.000221783	0.927467	0.356406	2.90739	0.00518453
ANKRD13C	-1.99951	0.0483508	-3.06133	0.00357146	-1.70674	0.0909435	-3.48552	0.000824233	-3.48658	0.000788853	-5.23592	2.46392e-06
ANKRD13D	-0.513129	0.609028	-2.45664	0.0176137	1.01365	0.313171	0.220071	0.826414	-3.96131	0.000158183	-4.60772	2.33595e-05
ANKRD16	0.00937366	0.99254	0.690458	0.493164	-0.241461	0.809687	-1.1407	0.257623	4.43119	2.87592e-05	4.57283	2.63885e-05
ANKRD17	0.568993	0.570676	1.48536	0.143855	0.448821	0.654522	-0.428099	0.669806	1.27651	0.205379	2.00107	0.050155
ANKRD18A	0.0832542	0.933821	2.00426	0.0505856	0.436178	0.663639	2.80735	0.00636249	2.96095	0.00401	6.02086	1.32954e-07
ANKRD2	0.476975	0.634453	-1.5412	0.129702	0.28994	0.772456	0.346073	0.730257	0.580395	0.56324	0.132651	0.894937
ANKRD20B	0.114525	0.909058	2.13756	0.0375679	1.16557	0.246533	2.22564	0.0290434	-0.574726	0.56705	0.827671	0.411309
ANKRD22	3.4583	0.000808943	2.57874	0.0129705	3.95384	0.00014286	2.35265	0.0212646	-0.0786698	0.937487	-0.561631	0.576569
ANKRD23	-2.36297	0.0201247	0.0275011	0.978172	-1.96281	0.0524187	-0.970319	0.335006	1.20677	0.230992	1.62249	0.110218
ANKRD26	-1.29191	0.199458	-0.367051	0.715161	-1.23823	0.218501	-0.900045	0.370977	0.785168	0.434618	0.737076	0.4641
ANKRD26P1	2.47186	0.0151834	2.54413	0.0141583	2.90681	0.00448838	3.55373	0.000661206	1.444	0.152548	0.2898	0.773021
ANKRD27	2.29413	0.0239398	0.992334	0.32591	-0.787453	0.432861	-0.467103	0.64178	2.09985	0.0388159	2.24364	0.0287571
ANKRD28	-2.0662	0.0414752	0.928048	0.357932	-3.82582	0.000225942	-2.92427	0.00456371	0.853351	0.395951	1.95504	0.0554876
ANKRD29	-0.0459936	0.96341	-0.0748502	0.940639	-3.97459	0.000132511	-3.29117	0.00152252	-4.10392	9.53636e-05	-1.70059	0.0944698
ANKRD30A	0.18288	0.855274	-0.857199	0.395508	1.25953	0.210742	-0.994848	0.323009	0.785073	0.434673	-1.1438	0.257486
ANKRD30BL	0.342463	0.732743	1.3942	0.169548	-1.18261	0.23974	0.422506	0.673865	0.934231	0.352928	1.45363	0.151533
ANKRD32	0.344991	0.730848	1.8347	0.0726249	1.36843	0.174214	-0.136795	0.891559	2.012	0.0475032	1.06498	0.291376
ANKRD33	1.15789	0.249753	-2.0833	0.0424628	1.58542	0.115997	1.03595	0.303555	1.20331	0.232319	0.4144	0.680137
ANKRD34B	1.03621	0.302681	0.49843	0.620411	1.30557	0.194664	0.770802	0.443246	2.19657	0.0308746	1.43027	0.158099
ANKRD35	-0.56097	0.576111	-1.42597	0.160217	-1.52058	0.131489	-0.874086	0.384862	-1.40475	0.163873	-1.28336	0.204559
ANKRD36B	-2.12558	0.0360781	0.38992	0.698286	-1.97766	0.050692	-0.727487	0.469193	-0.814279	0.417843	0.407804	0.684945
ANKRD36BP1	2.67979	0.00865595	-0.676111	0.502149	3.02801	0.00312461	-1.3366	0.185394	1.88316	0.0632236	-2.10099	0.040076
ANKRD37	2.557	0.0121081	4.41372	5.5798e-05	0.879635	0.381145	1.33282	0.186625	2.19345	0.0311062	2.27871	0.0264496
ANKRD39	-0.598404	0.550965	-0.740388	0.462598	-1.26348	0.209326	-2.38908	0.0194054	1.59205	0.115222	1.24402	0.218582
ANKRD40	0.0421156	0.966493	-0.264204	0.792731	3.55071	0.00058521	3.28552	0.00154944	-0.582104	0.562093	-0.781954	0.437478
ANKRD42	2.7706	0.00670677	2.12997	0.0382214	0.942948	0.347958	-1.28602	0.202391	0.666949	0.506677	1.37466	0.174617
ANKRD43	-0.223885	0.823318	-3.54287	0.000880348	1.51641	0.132539	1.31697	0.191859	-0.632762	0.52865	-2.15185	0.0356587
ANKRD44	0.0978989	0.922215	1.13759	0.260825	-2.3748	0.019447	-1.52635	0.13113	-5.20842	1.38854e-06	-2.07943	0.0420877
ANKRD45	3.38926	0.00101447	2.58012	0.0129253	2.84179	0.00542797	2.25532	0.0270298	2.87249	0.00518272	2.10683	0.0395457
ANKRD46	-2.67483	0.00877585	-2.78965	0.00749538	-0.716097	0.475584	-2.17178	0.0330337	-2.12299	0.0367701	-3.21057	0.00217795
ANKRD49	0.686689	0.493917	-1.13505	0.261875	1.91193	0.0587196	-1.57867	0.11862	2.1796	0.0321556	-1.11642	0.268927
ANKRD5	0.407086	0.684842	-0.297839	0.767085	2.79081	0.00628724	2.95821	0.00413742	0.406229	0.685632	-0.277707	0.782242
ANKRD50	-1.30046	0.196524	-1.12848	0.26461	-2.43953	0.01645	-2.57823	0.0118914	-1.6575	0.101239	-1.38247	0.172221
ANKRD52	-1.5484	0.124782	-1.33816	0.187022	-2.49322	0.0142838	0.401975	0.688846	-1.82818	0.0711587	-0.777644	0.439995
ANKRD53	0.578031	0.564583	-0.627497	0.533247	-0.439012	0.661591	-0.583657	0.561202	-1.26123	0.210803	-1.29698	0.199865
ANKRD54	-0.920272	0.359714	-1.91334	0.0615565	1.71832	0.0888025	-0.67474	0.501916	0.402374	0.688456	-0.572444	0.569272
ANKRD55	0.744216	0.458545	-0.705517	0.483829	1.153	0.251631	0.0781122	0.937947	0.233034	0.816316	-0.983355	0.329588
ANKRD6	-4.06044	9.93165e-05	-1.22387	0.226855	-8.35723	3.62308e-13	-5.64978	2.74259e-07	-8.50228	7.03588e-13	-4.38904	4.98477e-05
ANKRD60	2.14074	0.0348019	-1.67664	0.0999829	2.26227	0.0258227	1.02376	0.309241	2.25602	0.0267315	-0.204922	0.838363
ANKRD7	0.297474	0.766741	-1.38297	0.172944	0.973881	0.332442	1.59513	0.114889	-1.94252	0.0555072	-3.61647	0.000633992
ANKRD9	1.89959	0.0604583	1.41126	0.164487	1.55376	0.123369	1.18843	0.238414	1.56364	0.121752	0.76907	0.445027
ANKS1A	-6.31361	8.20261e-09	-3.14896	0.00278988	-7.83178	4.96074e-12	-4.96698	4.1581e-06	-6.34695	1.14578e-08	-2.62351	0.011147
ANKS1B	-3.38377	0.00103277	-2.45349	0.0177514	-4.59584	1.24924e-05	-2.88512	0.00510574	-2.97012	0.00390369	-2.23596	0.0292857
ANKS3	-1.19783	0.233903	0.120923	0.904247	-1.45066	0.149973	0.0596159	0.95262	0.735265	0.464276	1.75413	0.0847823
ANKS4B	1.4083	0.162239	0.36727	0.714999	3.15903	0.00208849	1.70185	0.0929265	2.57971	0.0116723	1.89938	0.0625787
ANKS6	5.06704	1.93015e-06	5.53868	1.19216e-06	3.55264	0.000581394	5.0021	3.62819e-06	4.89408	4.8671e-06	4.61666	2.26403e-05
ANKZF1	-6.59784	2.20818e-09	-2.92028	0.00527274	-7.49123	2.65285e-11	-3.49295	0.00080478	-8.60058	4.4856e-13	-3.4838	0.00095722
ANLN	-0.291904	0.770984	0.540559	0.591261	7.035	2.43158e-10	3.84611	0.00024993	6.941	8.34739e-10	3.40242	0.00122745
ANO1	1.34564	0.181556	1.66959	0.101378	-2.87717	0.0048965	-3.85554	0.000242028	-4.38244	3.44911e-05	-3.26597	0.00184906
ANO10	-0.829173	0.409042	-0.32728	0.74485	-2.64721	0.00941667	-2.14495	0.0351946	-1.94283	0.0554688	-2.02294	0.0477789
ANO2	1.86154	0.0656965	4.02974	0.000194191	-2.0449	0.0434651	-0.525124	0.601046	-0.885523	0.378464	0.0683348	0.945758
ANO3	-0.979269	0.329883	1.46001	0.15067	-3.1794	0.00195967	-1.38023	0.171617	1.03907	0.301826	2.88323	0.00554359
ANO4	-3.74107	0.000310301	-1.87396	0.0669057	-7.98344	2.33858e-12	-6.17605	3.10652e-08	-5.97118	5.79576e-08	-5.1105	3.88944e-06
ANO5	-1.75734	0.0820141	0.123368	0.90232	-3.0777	0.00268558	-1.71706	0.0900948	0.922462	0.358994	2.55497	0.0133141
ANO7	1.80993	0.0734033	-0.238788	0.812266	2.26212	0.0258323	1.81219	0.0739592	2.51576	0.0138291	1.57789	0.120124
ANP32A	1.08169	0.282073	1.93241	0.0591001	3.8765	0.000188663	3.179	0.00214815	4.947	3.95071e-06	4.32741	6.15507e-05
ANP32B	0.0893134	0.929017	0.62032	0.537922	1.76687	0.0802702	0.275227	0.783899	4.90338	4.69216e-06	2.07101	0.0428968
ANP32C	2.19065	0.0308725	2.79818	0.00732717	2.98499	0.00355741	0.914328	0.363475	3.63531	0.000483265	3.95377	0.000214884
ANP32D	-0.206676	0.836696	0.633547	0.529323	-1.03534	0.302983	0.580996	0.562985	0.612292	0.542039	0.816214	0.417776
ANP32E	2.99992	0.00343202	2.25702	0.0285	5.34201	5.69749e-07	2.00451	0.0486258	5.91421	7.3892e-08	3.29406	0.00170074
ANPEP	1.57845	0.117718	4.58698	3.13697e-05	1.02934	0.305778	0.749581	0.455852	-0.0503982	0.959928	-0.907311	0.368062
ANTXR1	3.62132	0.000468385	5.48055	1.46146e-06	-0.299073	0.765499	-1.69328	0.0945512	2.70577	0.00828741	3.97324	0.000201587
ANTXR2	4.5298	1.68204e-05	6.71674	1.82259e-08	0.634802	0.526993	-1.07663	0.285095	3.45975	0.000860598	4.11167	0.000127476
ANUBL1	1.47883	0.142427	-0.463391	0.645136	1.66149	0.0997159	0.171178	0.864544	2.12243	0.0368185	-0.154399	0.877841
ANXA1	4.02492	0.000113056	4.86369	1.23264e-05	-1.435	0.154376	-2.01612	0.0473687	-5.64305	2.3204e-07	-2.87368	0.00569169
ANXA10	0.724235	0.470664	0.703262	0.485221	0.668837	0.505126	0.496576	0.62094	1.51398	0.133875	-0.240259	0.810991
ANXA11	5.14911	1.37106e-06	4.75679	1.77177e-05	2.53512	0.0127749	0.936033	0.352261	-1.37378	0.173254	-1.71546	0.0916933
ANXA13	1.27364	0.205836	-1.0469	0.300281	1.05822	0.292481	0.738641	0.462431	2.44311	0.0167084	0.258443	0.796996
ANXA2	-1.14679	0.254289	0.462953	0.645447	-5.45877	3.43933e-07	-5.2316	1.47395e-06	-10.8152	1.86973e-17	-8.46357	1.17361e-11
ANXA2P1	0.801855	0.424597	-1.81949	0.0749497	-1.09244	0.277237	-3.87496	0.000226509	-2.94128	0.00424728	-5.17101	3.12181e-06
ANXA2P2	1.01494	0.312661	1.02338	0.311154	-3.84032	0.000214611	-4.89632	5.4631e-06	-6.53774	4.974e-09	-7.5575	3.74456e-10
ANXA2P3	2.64558	0.00951477	1.76734	0.0833992	2.45287	0.0158857	0.890712	0.375932	0.940499	0.349724	-0.805832	0.423689
ANXA3	1.9427	0.0549519	3.09504	0.00324919	-0.0532068	0.957672	0.251636	0.802011	-0.865461	0.389311	-1.52098	0.133794
ANXA4	2.5087	0.0137758	4.43354	5.22614e-05	-1.81914	0.0718525	-1.94009	0.0561286	-2.58438	0.0115272	-4.85249	9.83806e-06
ANXA5	4.71196	8.19444e-06	3.37899	0.00143431	0.438559	0.661918	-2.67308	0.00921762	-1.83408	0.0702694	-2.16653	0.0344657
ANXA6	3.1105	0.00245272	2.34178	0.0233016	-0.681017	0.497419	-1.06505	0.29027	-2.01689	0.0469799	-3.15918	0.00253157
ANXA7	3.38925	0.0010145	-0.427799	0.670672	0.550468	0.583214	-1.71987	0.0895799	-3.43873	0.000921076	-5.85559	2.47681e-07
ANXA9	1.69544	0.0931992	0.614305	0.541856	2.54672	0.0123831	3.14147	0.00240636	2.58982	0.0113604	1.12698	0.264471
AOAH	2.52303	0.0132608	0.507278	0.614236	0.778117	0.438319	-1.65234	0.102646	-7.49573	6.906e-11	-7.82717	1.33163e-10
AOC2	0.1061	0.915723	-0.179981	0.857909	1.11607	0.26704	2.03309	0.0455822	0.347249	0.729294	0.223691	0.823797
AOC3	2.05183	0.0428814	3.36377	0.00149997	-1.41916	0.158932	-1.70534	0.0922692	-3.29512	0.0014545	-1.28667	0.203411
AOX1	1.37585	0.172037	1.9131	0.061588	-0.234696	0.81492	-0.977199	0.331612	0.456715	0.649083	-0.530024	0.598154
AP1AR	1.99022	0.049381	0.275117	0.784383	3.06545	0.00278818	-0.955083	0.342604	2.88099	0.0050577	-0.494012	0.623196
AP1B1	2.69244	0.00835654	0.404743	0.687428	2.41975	0.0173189	-0.964311	0.337989	-1.34231	0.183198	-2.96627	0.00439801
AP1G1	2.07365	0.0407618	-0.175766	0.861202	3.94508	0.00014746	1.00655	0.317388	0.0486876	0.961287	-2.29489	0.0254419
AP1G2	1.6005	0.11274	1.20801	0.232842	5.08803	1.67574e-06	4.76578	9.00432e-06	-2.1617	0.0335569	-1.03291	0.306009
AP1M1	-0.0773857	0.938476	-0.851827	0.398454	1.39149	0.167135	-0.231495	0.817561	-0.719879	0.473646	-1.4285	0.158604
AP1M2	2.23841	0.0274808	-0.140545	0.888805	2.44447	0.0162391	2.4423	0.0169494	2.73335	0.00767807	2.23034	0.0296777
AP1S1	0.957134	0.340879	-0.595965	0.553941	2.2441	0.0270079	0.192133	0.848157	0.738062	0.462584	-0.995992	0.323463
AP1S2	1.98156	0.0503591	2.9525	0.00482803	0.158458	0.874412	-0.644313	0.521338	2.94116	0.00424882	1.40167	0.166436
AP1S3	0.795216	0.42843	-0.0493244	0.960861	-2.09928	0.0382848	0.416976	0.677887	-3.45154	0.000883747	-1.05581	0.295508
AP2A1	2.25705	0.0262481	1.41368	0.163777	0.448608	0.654675	-0.883578	0.379747	-0.443919	0.65827	-0.7703	0.444303
AP2A2	-2.58013	0.0113759	-1.97828	0.0535333	-1.28032	0.203367	-0.832643	0.40769	-6.09442	3.4179e-08	-4.23222	8.50385e-05
AP2B1	-2.56298	0.0119148	-1.63981	0.10745	-0.970682	0.334026	-1.27719	0.205476	-3.99067	0.000142654	-2.95686	0.00451569
AP2M1	2.17067	0.0323968	-0.181039	0.857084	3.10776	0.00244853	0.129147	0.897587	-0.755083	0.452362	-2.33032	0.0233521
AP2S1	4.57977	1.3831e-05	1.84374	0.0712717	2.93623	0.00411447	0.150982	0.880395	2.83611	0.00575077	1.31738	0.192984
AP3B1	2.62811	0.00998239	2.68009	0.00999646	1.10951	0.269847	-1.80138	0.0756615	-0.553687	0.5813	-2.00346	0.0498903
AP3B2	-2.00425	0.0478311	-2.45983	0.0174755	-0.680632	0.497662	-1.39371	0.167523	-2.24688	0.0273352	-3.27773	0.00178554
AP3D1	1.09881	0.274571	0.994321	0.324952	0.387097	0.699499	0.0630924	0.949861	-0.341842	0.733345	-0.10068	0.920157
AP3M1	-0.0523127	0.958387	-2.00438	0.0505719	3.75368	0.000291277	-0.42746	0.670269	0.6327	0.52869	-1.43557	0.156591
AP3M2	0.196263	0.844815	1.33263	0.188818	-0.259661	0.795654	-0.281876	0.778815	0.0731102	0.941896	0.986113	0.328245
AP3S1	2.83378	0.0055966	1.42036	0.161836	1.45065	0.149977	-3.70954	0.000395913	1.09048	0.278695	-1.81797	0.0743244
AP3S2	0.590339	0.556336	-1.28752	0.203962	1.53141	0.128795	-0.0587747	0.953288	-1.29707	0.198243	-3.134	0.00272383
AP4B1	-2.49938	0.0141204	1.23622	0.222271	-4.42257	2.4642e-05	-1.13323	0.260726	0.490025	0.625425	3.0784	0.00319801
AP4E1	0.0649895	0.948316	-0.769631	0.445213	2.36858	0.0197592	0.830924	0.408654	0.0713907	0.943261	-1.49821	0.139597
AP4M1	-3.74276	0.000308487	-1.63469	0.108522	-0.449627	0.653943	-1.00844	0.316488	-2.14083	0.0352574	-1.96427	0.054381
AP4S1	-1.82662	0.070833	-1.93315	0.0590064	0.25451	0.799619	-0.264548	0.792083	-3.5429	0.000656235	-4.30848	6.56536e-05
APAF1	-2.24729	0.0268873	-1.78588	0.0803083	1.76547	0.0805075	-1.52049	0.132593	-0.44563	0.657039	-2.31899	0.0240031
APBA1	-2.49073	0.0144472	-4.06053	0.000175996	-3.55457	0.000577625	-4.06671	0.00011657	-8.86606	1.32935e-13	-9.5471	1.99877e-13
APBA2	-3.97586	0.000135054	-5.31582	2.59723e-06	-1.31028	0.193072	-2.8758	0.00524332	-1.2821	0.203419	-2.94086	0.00472268
APBA3	2.64212	0.00960573	0.203482	0.839601	4.68557	8.73609e-06	1.71164	0.0910956	4.54214	1.89424e-05	1.75786	0.0841401
APBB1	-0.0818844	0.934907	-3.33175	0.00164748	2.11899	0.0365433	0.467911	0.641205	-1.14552	0.255326	-3.31276	0.00160832
APBB1IP	3.22997	0.00169057	3.3973	0.00135895	2.73666	0.00733448	1.15195	0.253002	-4.66533	1.18408e-05	-5.63447	5.66214e-07
APBB2	0.882573	0.379649	3.28222	0.00190312	-3.75964	0.000285268	-2.60746	0.0110008	-3.4995	0.000756375	-2.1047	0.0397383
APBB3	-1.77577	0.078906	-2.14335	0.0370756	-1.56683	0.120283	-2.32527	0.0227646	-4.11038	9.31816e-05	-2.67774	0.00966566
APC	-2.84619	0.00539943	-3.93129	0.000265409	-1.79111	0.0762704	-3.78745	0.00030488	-3.26996	0.00157373	-4.62325	2.21236e-05
APC2	-3.00518	0.00337821	-3.03463	0.00384768	-0.93514	0.351947	-2.23923	0.0281059	-1.61003	0.111234	-0.760631	0.450012
APCDD1	0.0722376	0.942562	1.58516	0.119363	2.1708	0.0322888	0.616569	0.539386	-0.570782	0.569708	0.054773	0.956511
APCDD1L	2.11074	0.0373666	0.557479	0.579738	1.2447	0.216123	1.48415	0.141961	0.707951	0.480983	1.1645	0.249073
APCS	0.474775	0.636014	-0.382397	0.703821	1.35582	0.17818	2.4017	0.0187957	1.67412	0.0979181	1.31341	0.194306
APEH	-1.3445	0.181922	-0.303166	0.763046	-1.31497	0.191497	-0.912986	0.364176	0.633832	0.527955	0.461312	0.64633
APEX1	-0.520527	0.603883	2.47467	0.016845	2.82737	0.00565941	2.62883	0.0103882	5.70436	1.79454e-07	6.26578	5.25962e-08
APEX2	2.57651	0.0114875	1.93324	0.0589956	3.91994	0.000161446	3.72644	0.000374191	3.20608	0.00191878	2.19054	0.0325897
APH1A	-0.519462	0.604622	1.75352	0.0857658	1.82027	0.0716793	0.816311	0.416908	1.75873	0.0823544	2.18381	0.0331068
APH1B	-0.299457	0.765232	-2.72533	0.00888279	0.0364529	0.970993	-0.116393	0.907652	-4.92017	4.39194e-06	-6.38071	3.39758e-08
API5	2.49004	0.0144734	-0.190184	0.849951	4.85336	4.42881e-06	2.15085	0.0347098	1.94146	0.0556372	-0.974963	0.333698
APIP	0.580384	0.563002	-0.0725817	0.942434	2.30975	0.0229372	0.404211	0.687208	1.15078	0.253168	-0.554012	0.581738
APITD1	-0.481424	0.631299	-2.3109	0.0250879	2.70863	0.00793685	0.843296	0.401744	-0.0511852	0.959302	-3.24079	0.00199225
APLF	0.410085	0.682648	1.14611	0.257318	-1.12569	0.262965	-0.526463	0.60012	-0.977876	0.331012	-1.13108	0.262759
APLN	2.28731	0.0243507	1.66729	0.101836	1.1196	0.265539	1.24472	0.217111	2.92123	0.0045024	3.60947	0.00064806
APLNR	0.129932	0.896889	0.355453	0.723776	-0.926026	0.35664	-2.61863	0.0106767	-5.0757	2.36835e-06	-4.88314	8.81862e-06
APLP1	-1.7821	0.0778619	-2.62261	0.0115958	0.999217	0.320078	-0.258959	0.796376	-3.91349	0.000187004	-3.15225	0.00258314
APLP2	-1.12873	0.261797	1.66871	0.101553	-6.10217	1.94776e-08	-2.97026	0.00399514	-4.45665	2.61439e-05	0.158311	0.874771
APOA1	1.38789	0.168349	-1.00133	0.321585	0.937056	0.350965	0.429022	0.669137	1.72889	0.087592	-0.619031	0.538362
APOA1BP	2.35255	0.0206653	1.80921	0.0765545	3.64148	0.000429697	2.09864	0.039215	2.43602	0.0170165	1.47542	0.145603
APOA2	2.40598	0.0180241	0.655227	0.515386	3.83602	0.000217913	1.10395	0.273146	2.05649	0.0429153	0.861163	0.392756
APOA4	2.05138	0.0429258	0.278211	0.782021	3.30028	0.00133538	1.83033	0.071173	2.17444	0.0325542	1.42567	0.159417
APOA5	-0.0155929	0.987591	-0.836172	0.407117	0.607333	0.544993	-0.0349235	0.972233	1.28419	0.202691	-0.322791	0.748035
APOB	1.40312	0.163773	1.06802	0.290746	1.93904	0.0552867	1.37568	0.173016	1.58126	0.117668	0.555514	0.580717
APOB48R	0.899792	0.37046	-1.87398	0.0669017	1.31725	0.190737	-0.718358	0.474768	0.134545	0.893301	-0.351578	0.726451
APOBEC1	1.47178	0.144317	0.209568	0.834873	2.1268	0.0358729	0.873964	0.384928	2.07316	0.0412968	1.05165	0.297397
APOBEC2	0.552484	0.581887	-1.61047	0.113719	2.88718	0.00475497	0.166049	0.868565	1.49865	0.137805	0.448869	0.655228
APOBEC3A	1.50003	0.136855	2.70411	0.00939009	1.62982	0.106254	0.880989	0.381138	0.746265	0.457641	-2.04191	0.0457977
APOBEC3B	1.592	0.11464	1.74455	0.0873335	1.65552	0.100923	2.57045	0.0121391	-0.988016	0.326051	-2.29173	0.0256359
APOBEC3C	3.5312	0.00063486	3.01826	0.00402689	1.93516	0.0557681	0.0921533	0.926822	-1.83858	0.0695973	-2.31089	0.0244785
APOBEC3D	1.88608	0.0622761	1.1037	0.275115	0.681845	0.496898	2.15228	0.0345928	-3.44281	0.00090902	-2.88952	0.00544799
APOBEC3F	1.71935	0.0887401	1.53436	0.131373	1.22305	0.224157	1.87223	0.0650734	-2.1892	0.0314253	-2.84874	0.0060962
APOBEC3G	2.88793	0.00478212	1.68348	0.0986445	1.6366	0.104827	0.792879	0.43035	-2.75835	0.00716144	-3.3733	0.00134065
APOBEC3H	3.43962	0.000860285	-1.62034	0.111578	3.94035	0.000149999	0.743094	0.459746	1.19443	0.235752	-1.6223	0.110259
APOBEC4	-0.797388	0.427173	-1.77744	0.081703	0.80073	0.425168	-0.0814543	0.935298	0.327238	0.744322	-0.42572	0.671915
APOC1P1	0.0318255	0.974677	0.605522	0.547627	-0.840035	0.402873	0.233979	0.815639	-1.34288	0.183016	0.692995	0.491127
APOC2	2.12946	0.0357475	0.325999	0.745813	1.12726	0.262305	-0.0396816	0.968452	0.612531	0.541881	-2.27203	0.026876
APOC3	1.08053	0.282584	-0.295957	0.768514	2.2729	0.0251502	1.95877	0.0538579	1.84522	0.0686151	1.45987	0.149816
APOC4	1.85498	0.0666361	-0.091322	0.927609	0.40059	0.689568	1.37994	0.171706	0.25837	0.796769	0.855402	0.39591
APOD	2.30584	0.0232488	2.63552	0.0112175	-0.249813	0.803239	-1.4911	0.14013	-6.85429	1.22792e-09	-2.86937	0.00575987
APOE	2.20871	0.0295496	1.85688	0.0693453	-0.00664316	0.994713	-1.76303	0.0819695	-4.93564	4.13195e-06	-3.91757	0.000241886
APOF	1.70765	0.0909007	0.525126	0.601864	1.3438	0.182024	1.79688	0.0763799	0.971177	0.334316	1.95836	0.0550877
APOH	1.58666	0.115843	1.35828	0.180595	1.80066	0.0747405	1.7869	0.0779947	1.83198	0.0705849	1.59087	0.117171
APOL1	5.25681	8.71636e-07	6.11131	1.57639e-07	1.63785	0.104565	0.668107	0.506116	-1.96673	0.0525965	-1.09709	0.277216
APOL2	1.26829	0.207729	1.0714	0.289238	-3.4123	0.000927895	-0.738471	0.462533	-6.39642	9.23511e-09	-3.17633	0.00240793
APOL3	3.38881	0.00101595	2.47199	0.0169572	1.31698	0.190827	0.900847	0.370553	-5.79386	1.23093e-07	-4.12612	0.000121474
APOL4	-0.416491	0.677971	1.44178	0.155725	-2.50843	0.0137184	-4.03668	0.0001295	-1.74883	0.0840618	-1.66439	0.101522
APOL5	-0.957475	0.340708	-1.41983	0.161989	-1.75974	0.0814794	-0.918992	0.361046	0.144315	0.885606	0.208831	0.835324
APOL6	4.20711	5.7736e-05	3.98504	0.000223873	0.813879	0.417629	-0.05592	0.955554	-4.27466	5.13465e-05	-3.90267	0.000253922
APOLD1	0.961335	0.338774	-0.29793	0.767016	-0.118027	0.906281	-2.90578	0.00481278	-2.98098	0.00378109	-3.30535	0.00164437
APOM	0.32364	0.746907	1.62208	0.111203	2.18069	0.0315274	1.83806	0.0700129	3.16112	0.00220275	2.17792	0.0335648
APOO	2.84827	0.00536701	1.81149	0.0761969	3.31733	0.00126406	1.52553	0.131332	4.13463	8.54048e-05	0.757598	0.451812
APOOL	1.39113	0.167368	1.03576	0.305401	2.76055	0.0068543	1.01156	0.315002	1.48523	0.141317	0.279436	0.780921
APP	0.385058	0.701037	0.878886	0.383753	-2.13728	0.0349892	-2.18551	0.0319739	-3.16101	0.00220351	-1.54994	0.126691
APPBP2	-0.416105	0.678252	-2.09148	0.0416914	5.45564	3.48639e-07	1.72564	0.0885308	-0.896153	0.372795	-2.64849	0.0104406
APPL1	1.25296	0.213233	-0.515372	0.608611	1.24938	0.214416	-1.63214	0.106842	0.593672	0.554366	-1.8461	0.0700718
APPL2	-0.697204	0.487343	0.209514	0.834916	1.22327	0.224075	-0.545478	0.587044	0.753939	0.453046	-0.772907	0.442771
APRT	1.42212	0.158199	0.54797	0.5862	0.991224	0.323945	0.000634816	0.999495	1.95125	0.0544423	1.15331	0.253595
APTX	2.3328	0.0217247	1.01077	0.317092	3.49428	0.000707243	2.61804	0.0106937	2.10486	0.0383649	0.476539	0.635512
AQP1	2.72684	0.0075896	4.72277	1.98762e-05	0.149098	0.881774	-0.834076	0.406887	-3.02415	0.00332813	-1.20604	0.232786
AQP10	0.13277	0.89465	-0.799862	0.427651	1.45726	0.148148	1.68976	0.0952277	1.22369	0.224574	1.72302	0.0903064
AQP11	-0.530193	0.597189	-1.90292	0.0629353	-2.57676	0.0114185	-2.87411	0.00526862	-1.9796	0.0511032	-1.53214	0.131019
AQP2	-0.691129	0.491135	-0.88484	0.380564	-0.806593	0.421796	0.950985	0.344667	-0.629108	0.531027	0.368277	0.714031
AQP3	2.43372	0.016775	1.17792	0.244519	3.95131	0.000144172	2.26751	0.0262398	1.64933	0.102907	-0.0926946	0.926471
AQP4	-1.94869	0.0542223	-1.66185	0.102929	-3.43762	0.000853623	-3.03462	0.0033089	-2.34805	0.0212811	-2.74309	0.00812088
AQP5	2.02772	0.0453316	-0.418272	0.677576	2.73104	0.00745175	1.8405	0.06965	2.68058	0.00888219	0.682168	0.497895
AQP6	1.70099	0.0921492	-1.21498	0.230198	2.26873	0.0254122	2.6904	0.00879306	2.40461	0.0184423	2.0588	0.0440936
AQP7	1.34465	0.181873	0.330528	0.74241	-0.332417	0.740263	0.958749	0.340766	-0.126337	0.899774	1.77191	0.0817551
AQP8	2.07473	0.0406597	-0.982131	0.33086	2.6242	0.0100327	2.9982	0.00368237	2.63033	0.010186	1.4942	0.140639
AQP9	1.48352	0.141178	3.33437	0.00163491	1.45504	0.14876	1.98767	0.0504988	0.711063	0.479063	1.7229	0.0903287
AQPEP	0.844114	0.400683	-0.352425	0.726031	0.934194	0.352432	-1.72543	0.0885683	0.804446	0.423466	-0.515405	0.608264
AQR	0.383515	0.702177	0.733534	0.466728	2.92626	0.00423784	0.530837	0.5971	3.2259	0.00180481	2.5503	0.0134747
AR	1.83649	0.0693474	1.97298	0.0541526	0.162921	0.870906	-0.376833	0.707362	0.480146	0.632402	-0.0229961	0.981734
ARAF	2.54544	0.0124898	2.4503	0.0178917	3.98535	0.00012743	1.91029	0.0599195	1.50001	0.137453	0.0933657	0.92594
ARAP1	0.693049	0.489935	3.66877	0.000600568	-1.65152	0.101739	0.55175	0.58276	-1.45836	0.148561	2.30164	0.0250312
ARAP2	3.53583	0.000625085	3.0753	0.00343443	2.16661	0.0326161	0.928243	0.356259	-5.49717	4.25787e-07	-4.66	1.94471e-05
ARAP3	-2.21364	0.0291968	1.49627	0.140998	-5.56854	2.12947e-07	-3.02989	0.00335536	-2.18072	0.0320694	3.22145	0.00210925
ARCN1	-1.67534	0.0970892	-0.0594684	0.952821	-3.81919	0.000231302	-3.55499	0.000658503	-0.956788	0.341487	-0.543931	0.588611
AREG	1.63941	0.104367	0.583761	0.562059	0.951588	0.343577	-1.65748	0.1016	-2.13596	0.0356647	-1.39107	0.169609
ARF1	1.07686	0.284215	0.843425	0.403089	-0.21225	0.83234	-0.535578	0.593835	-0.431753	0.667054	-0.538834	0.5921
ARF3	1.94831	0.0542681	-0.282596	0.778677	1.9524	0.0536596	-0.839433	0.403894	-2.17229	0.0327215	-4.0291	0.000167697
ARF4	3.32013	0.00126876	2.03225	0.0475673	1.68505	0.0950669	-0.424596	0.672347	3.21635	0.00185892	1.54379	0.128172
ARF5	-0.0354979	0.971756	-1.60864	0.114119	2.55118	0.0122354	1.23589	0.220357	-0.445479	0.657148	-3.05588	0.00341121
ARF6	3.32183	0.00126181	3.7418	0.00047973	6.04994	2.47182e-08	2.60743	0.0110017	2.75961	0.00713615	1.86148	0.0678357
ARFGAP1	0.131295	0.895814	0.956018	0.343756	-0.587019	0.558501	-0.441927	0.659814	-0.52216	0.602967	-0.631928	0.529961
ARFGAP2	0.990831	0.324233	-1.28336	0.205402	3.0021	0.00337908	1.38423	0.170392	-0.834505	0.406421	-2.29334	0.0255368
ARFGAP3	0.268631	0.788784	-0.48169	0.632171	-0.279408	0.780503	-2.17089	0.0331041	-3.41385	0.000997805	-4.62934	2.16566e-05
ARFGEF1	-3.24212	0.00162694	-1.77026	0.082906	-3.81328	0.000236187	-4.06453	0.000117462	-2.95273	0.00410763	-2.57959	0.0124951
ARFGEF2	1.21034	0.229089	-0.410726	0.683064	0.339263	0.735116	-0.121718	0.903448	-2.7683	0.00696471	-3.08452	0.00314227
ARFIP1	3.12163	0.0023701	1.79646	0.0785869	4.35874	3.15248e-05	1.21417	0.228494	2.37943	0.0196616	0.046021	0.963454
ARFIP2	2.69756	0.00823824	1.29041	0.202965	4.56978	1.38498e-05	2.6926	0.00874037	2.47263	0.0154791	1.00311	0.320048
ARFRP1	-1.67888	0.0963944	0.83047	0.410301	-1.98408	0.049961	-0.668973	0.505567	-2.29331	0.02439	-0.610548	0.543926
ARG1	1.85288	0.0669401	0.216343	0.829618	2.46312	0.0154645	1.33043	0.187409	1.77269	0.0799944	0.598764	0.551702
ARG2	1.24446	0.216329	-0.985665	0.32914	3.34229	0.00116607	0.770507	0.44342	1.82014	0.0723859	-1.4918	0.141265
ARGLU1	-1.99636	0.048698	-3.63561	0.000664612	0.425443	0.671419	-2.90428	0.00483354	-2.50299	0.0143004	-5.21654	2.64462e-06
ARHGAP1	3.48308	0.000745261	1.4917	0.142188	1.28199	0.202781	-0.381208	0.704127	-3.5407	0.000661001	-2.74369	0.00810803
ARHGAP10	1.62258	0.107924	3.65776	0.000621139	-3.79026	0.000256177	-4.32258	4.677e-05	-0.555128	0.580318	1.02046	0.311821
ARHGAP11A	0.0335017	0.973343	1.16588	0.249307	8.81793	3.57469e-14	5.05549	2.9467e-06	9.64422	3.77755e-15	5.61543	6.078e-07
ARHGAP12	-0.077219	0.938608	-2.48323	0.0164905	-1.50614	0.135153	-3.7999	0.000292334	-3.39681	0.00105381	-5.16144	3.23254e-06
ARHGAP15	3.21278	0.00178461	1.73139	0.0896743	0.880051	0.380921	-0.543327	0.588516	-7.86239	1.30791e-11	-6.36251	3.64119e-08
ARHGAP17	2.40069	0.0182711	2.43586	0.0185394	0.508216	0.61241	0.502364	0.616883	0.409026	0.683587	0.55546	0.580754
ARHGAP18	2.98134	0.00362832	4.51762	3.95386e-05	-0.800925	0.425055	-2.0709	0.0418088	-3.19864	0.00196331	-3.31269	0.00160866
ARHGAP19	-0.608528	0.54426	-0.356108	0.723289	0.617877	0.538047	0.119879	0.904899	1.71561	0.0900091	1.56886	0.122215
ARHGAP20	2.17413	0.0321279	2.2606	0.0282609	-1.76716	0.0802214	-1.6172	0.110034	-0.592244	0.555317	0.296578	0.767866
ARHGAP21	-5.25592	8.74899e-07	-4.31567	7.70327e-05	-6.15184	1.55163e-08	-4.22797	6.5782e-05	-8.48393	7.6525e-13	-8.07558	5.14817e-11
ARHGAP22	-3.75143	0.00029932	-5.07281	6.02368e-06	-2.7323	0.0074253	-2.06411	0.0424658	-8.30044	1.77184e-12	-7.55689	3.75328e-10
ARHGAP24	4.3773	3.03288e-05	3.4257	0.00124943	-0.7751	0.440092	-1.76508	0.0816205	-0.486772	0.627719	-1.01678	0.313556
ARHGAP25	2.22633	0.0283065	3.37347	0.00145777	1.87624	0.0635091	1.94888	0.0550496	-3.53767	0.000667595	-3.01603	0.00382131
ARHGAP26	-5.55182	2.46254e-07	-2.0146	0.0494515	-7.80389	5.6943e-12	-5.73105	1.9673e-07	-5.60602	2.70859e-07	-4.67487	1.84568e-05
ARHGAP27	2.42501	0.0171584	0.88877	0.378469	2.6454	0.00946396	2.29594	0.0244744	-3.66596	0.000436165	-3.07773	0.00320417
ARHGAP28	-4.05286	0.000102106	-2.29732	0.0259116	-6.19734	1.25898e-08	-4.29647	5.14081e-05	-4.48368	2.362e-05	-2.89916	0.0053044
ARHGAP29	3.27577	0.00146218	5.38013	2.07582e-06	-0.251283	0.802106	0.543133	0.588649	2.36516	0.0203839	4.3221	6.26764e-05
ARHGAP30	2.78217	0.0064895	1.67208	0.100884	2.97522	0.00366308	1.53153	0.129846	-4.26655	5.28969e-05	-3.99185	0.000189626
ARHGAP32	-7.86748	5.12633e-12	-2.12176	0.038939	-8.31856	4.39698e-13	-4.37031	3.93187e-05	-2.3261	0.022483	0.963899	0.339168
ARHGAP33	-4.24377	5.03249e-05	-3.17286	0.0026065	-0.581646	0.562101	-1.39513	0.167093	-1.11708	0.267223	-0.53647	0.593721
ARHGAP36	-1.01546	0.312414	-1.65301	0.104722	-1.91519	0.058297	-2.36591	0.0205704	-7.37388	1.19745e-10	-6.93437	4.09257e-09
ARHGAP4	2.59933	0.0107983	3.78383	0.000421172	2.36186	0.020101	2.05786	0.0430792	-0.214877	0.830397	-0.434913	0.665268
ARHGAP42	1.98211	0.050297	3.68526	0.000570954	-2.41624	0.0174772	-3.22899	0.00184435	-2.6427	0.00984983	-3.35889	0.00140022
ARHGAP44	0.604536	0.546899	-0.0834784	0.933811	-1.96472	0.0521936	-2.83596	0.00587042	-2.24694	0.0273311	-2.25272	0.0281432
ARHGAP5	3.89892	0.000178	2.06268	0.0444641	3.81948	0.00023107	0.474066	0.63683	1.39599	0.166486	-0.575311	0.567345
ARHGAP6	2.60095	0.0107509	2.59287	0.0125124	-2.2154	0.0289782	-1.85582	0.0674076	-2.14744	0.0347106	-2.82204	0.00655839
ARHGAP9	2.71163	0.00792055	2.4991	0.0158514	1.99282	0.0489792	1.32163	0.190308	-3.18867	0.00202443	-2.94367	0.00468578
ARHGDIA	1.8421	0.0685151	-1.11395	0.270734	3.06865	0.00276103	1.15465	0.251898	1.19386	0.235974	-0.740554	0.462004
ARHGDIB	2.40833	0.0179151	3.02481	0.00395425	2.05335	0.0426229	0.488863	0.626365	-5.92264	7.1285e-08	-4.86841	9.29479e-06
ARHGDIG	-2.16735	0.0326562	-1.29976	0.199765	-5.6714	1.35335e-07	-3.16305	0.00225457	-3.06061	0.00298532	-1.2122	0.230437
ARHGEF1	1.40384	0.16356	0.327314	0.744825	1.23189	0.220851	-0.410445	0.68265	-4.96353	3.70069e-06	-3.91888	0.000240855
ARHGEF10	0.326698	0.7446	2.9598	0.00473226	-2.00889	0.0472171	1.1386	0.258496	2.05004	0.0435555	5.15704	3.28459e-06
ARHGEF10L	-6.20194	1.3656e-08	-6.40717	5.49915e-08	-5.04648	1.99395e-06	-5.84191	1.24721e-07	-10.8075	1.93515e-17	-11.3528	2.93318e-16
ARHGEF11	-3.89542	0.000180238	-4.46874	4.65108e-05	-4.26249	4.55198e-05	-1.98694	0.050581	-9.87767	1.30277e-15	-8.7227	4.39405e-12
ARHGEF12	-4.55008	1.55388e-05	-1.08221	0.284458	-7.92631	3.10544e-12	-4.65488	1.3698e-05	-4.12072	8.97847e-05	-0.697795	0.488142
ARHGEF15	1.5798	0.117409	2.34326	0.0232188	-0.708165	0.480474	0.67998	0.498611	-0.35678	0.722173	0.410904	0.682684
ARHGEF16	0.615658	0.539562	-1.01564	0.314792	0.953553	0.342586	-0.244922	0.807186	0.412554	0.68101	0.0696753	0.944696
ARHGEF17	-2.36225	0.0201618	0.138854	0.890134	-5.65004	1.48741e-07	-3.63909	0.000500042	-3.1628	0.00219152	0.133667	0.894136
ARHGEF18	2.51939	0.0133898	0.236317	0.814172	5.15394	1.26986e-06	1.98476	0.0508287	1.90949	0.0596964	-0.833278	0.408166
ARHGEF19	-0.137746	0.890727	-0.348782	0.728747	1.16916	0.245091	2.88406	0.00512133	-0.213936	0.831128	-0.831626	0.40909
ARHGEF2	2.56122	0.0119714	6.73981	1.67851e-08	1.59113	0.114706	2.01938	0.0470212	3.66922	0.000431427	4.43515	4.25382e-05
ARHGEF25	-5.9791	3.73616e-08	-0.399088	0.691563	-7.88597	3.7932e-12	-3.75358	0.000341688	-4.92146	4.36969e-06	0.088019	0.93017
ARHGEF26	1.60959	0.110737	2.51121	0.015379	-2.19607	0.030375	-2.68456	0.0089341	-2.48141	0.0151296	-2.51765	0.0146488
ARHGEF3	-0.627599	0.531742	-2.23563	0.0299648	-1.64696	0.102674	-1.24605	0.216624	-6.26566	1.63141e-08	-5.82712	2.75605e-07
ARHGEF35	1.22203	0.224659	2.06158	0.0445731	-0.0257166	0.979534	1.58997	0.116048	-1.62548	0.107899	-1.86568	0.0672358
ARHGEF37	-0.146165	0.884094	-0.747862	0.458118	-3.45633	0.000802406	-0.697059	0.487921	-2.74716	0.0073887	-1.39211	0.169297
ARHGEF38	2.43461	0.016736	-0.921671	0.361216	3.16084	0.00207677	-0.190287	0.849598	2.35287	0.0210246	-0.553664	0.581974
ARHGEF4	0.254559	0.799603	0.686758	0.495473	-2.44286	0.0163072	-1.18896	0.238208	0.61751	0.538609	2.30533	0.0248092
ARHGEF40	0.706415	0.481624	2.38525	0.0209795	-1.28567	0.201499	-0.842502	0.402186	-2.12923	0.0362351	-0.912497	0.365351
ARHGEF5	0.836243	0.405073	1.35683	0.181052	0.493899	0.62245	2.32139	0.0229846	-0.1309	0.896175	0.958863	0.341678
ARHGEF6	3.15761	0.00212039	2.33869	0.0234751	-0.135228	0.892701	-0.887041	0.377892	-8.05289	5.48947e-12	-6.17704	7.36483e-08
ARHGEF7	-2.91332	0.00443894	-2.99081	0.00434488	-3.18099	0.00194991	-4.78829	8.26455e-06	-3.26286	0.00160896	-4.34285	5.8391e-05
ARID1A	-4.04297	0.000105861	-3.61379	0.000710269	-0.0561453	0.955337	-0.286695	0.775137	-5.58753	2.92562e-07	-4.34757	5.74558e-05
ARID1B	-2.83102	0.00564143	-2.5401	0.0143027	-2.00712	0.0474093	-3.5471	0.000675589	-2.56496	0.0121409	-2.16253	0.0347872
ARID3A	0.882205	0.379847	0.89316	0.376137	1.11497	0.267507	-0.311708	0.756128	0.448962	0.654643	-1.46987	0.147097
ARID3B	-3.2305	0.00168775	-2.09095	0.0417406	-0.0331574	0.973615	1.50863	0.135595	-3.46322	0.000850999	-1.75075	0.085369
ARID4A	1.0247	0.308052	-0.0101849	0.991915	1.85384	0.0666799	-0.00252524	0.997992	-0.917307	0.361672	-2.30738	0.0246871
ARID4B	-0.678681	0.498956	-1.27206	0.209355	0.12214	0.903031	-2.78005	0.00686717	-0.710832	0.479205	-2.74334	0.00811555
ARID5A	3.94776	0.000149443	3.42386	0.00125627	2.75567	0.00695004	0.859933	0.392566	0.296641	0.767491	-1.23176	0.223098
ARIH1	-0.818405	0.415132	-2.25247	0.0288062	0.473328	0.637001	-1.48323	0.142205	-0.676168	0.500837	-2.95439	0.00454713
ARIH2	-1.23617	0.219381	0.613205	0.542577	-1.74606	0.0838414	-0.736597	0.463666	0.125361	0.900545	0.654581	0.51537
ARL1	2.14558	0.0344023	1.38814	0.171372	1.30945	0.193354	-0.993528	0.323647	-0.48578	0.628419	-1.41793	0.161654
ARL10	-3.07869	0.00270393	-2.23671	0.0298893	0.824131	0.411807	0.351541	0.726168	0.360558	0.719357	2.14499	0.036228
ARL11	3.71217	0.000342986	2.15591	0.0360277	2.70622	0.00799055	1.56715	0.121291	2.09011	0.0397063	-2.19952	0.0319119
ARL13B	1.83497	0.0695755	1.28164	0.206002	4.50673	1.77502e-05	1.60575	0.112531	4.38285	3.44388e-05	0.180515	0.857389
ARL14	-0.234177	0.815341	0.0252917	0.979925	0.23568	0.814158	0.250586	0.802819	-0.809204	0.42074	-0.151593	0.880043
ARL15	1.57163	0.119292	1.82342	0.0743424	-0.663379	0.508599	-2.13595	0.0359468	-0.108172	0.914124	-0.0756503	0.939962
ARL17A	-1.88183	0.0628572	0.056254	0.955368	-0.540657	0.589935	1.72496	0.0886534	-0.680586	0.498051	1.449	0.152818
ARL2BP	1.64321	0.103576	-1.01047	0.317234	2.95204	0.00392565	0.208257	0.835593	-0.993314	0.323479	-3.28936	0.00172477
ARL3	-0.734089	0.464665	-2.97375	0.00455421	2.56313	0.0118476	-1.51038	0.135149	-0.268529	0.788967	-3.44276	0.00108553
ARL4A	2.03485	0.0445951	1.50799	0.137979	2.47983	0.0147986	-0.610204	0.543571	0.563536	0.574608	-0.388442	0.699136
ARL4C	0.695214	0.488583	0.14155	0.888016	-0.892346	0.374329	-3.01117	0.00354517	-2.80472	0.00628627	-1.03415	0.305432
ARL4D	1.31243	0.192471	0.817613	0.417537	2.63373	0.00977318	0.785904	0.434399	-0.660388	0.510856	-3.59446	0.000679209
ARL5B	-0.537364	0.592247	-1.04797	0.299792	2.80457	0.0060438	0.589193	0.557503	2.90399	0.00473299	1.29971	0.198931
ARL6	0.83007	0.408538	-0.456058	0.650363	0.236867	0.81324	-0.881064	0.381098	0.308714	0.758322	-0.536676	0.59358
ARL6IP1	2.54704	0.0124364	-0.61332	0.542501	6.69713	1.22026e-09	2.77442	0.00697559	2.85976	0.00537531	-0.449701	0.654631
ARL6IP4	-0.00813806	0.993524	-0.057999	0.953985	0.42754	0.669896	-1.80392	0.0752599	0.821988	0.413467	-1.08433	0.282782
ARL6IP5	2.38074	0.0192318	-0.283168	0.778241	2.11064	0.0372725	-1.71443	0.0905795	-3.37204	0.0011405	-5.24508	2.38282e-06
ARL6IP6	-3.15555	0.00213397	-2.98406	0.0044266	1.25069	0.213938	-1.09658	0.276336	1.27533	0.205793	-0.769261	0.444914
ARL8A	-1.06446	0.289761	-2.71017	0.00924268	-0.778279	0.438224	-2.7857	0.00675976	-3.13699	0.00237095	-4.89751	8.37696e-06
ARL8B	1.17285	0.243728	1.13902	0.260232	-1.55417	0.123272	-2.72863	0.00791848	-1.83552	0.0700544	-2.95215	0.00457584
ARL9	-0.807445	0.421386	-0.527603	0.600156	-0.000887405	0.999294	-1.72911	0.0879031	2.138	0.0354938	1.55901	0.124529
ARMC1	1.33438	0.185202	-0.470824	0.639856	3.76902	0.000276031	-0.502736	0.616623	2.39784	0.0187633	0.155461	0.877007
ARMC10	2.27453	0.0251369	1.94485	0.0575437	2.05227	0.0427304	0.511367	0.610596	3.02276	0.00334192	2.17104	0.0341065
ARMC2	-3.20249	0.00184323	-3.7629	0.000449421	-6.18069	1.35914e-08	-5.61497	3.16038e-07	-9.48698	7.74759e-15	-6.80784	6.64641e-09
ARMC3	1.12144	0.264867	1.24046	0.220711	1.45113	0.149842	0.327278	0.744369	2.34036	0.0216952	0.928495	0.357066
ARMC4	1.88547	0.0623597	0.0792792	0.937133	1.56286	0.121213	0.0091133	0.992753	2.3297	0.0222817	-0.142399	0.887267
ARMC5	0.984206	0.327463	-0.54823	0.586023	1.35229	0.179303	1.37643	0.172783	1.04892	0.297297	1.06514	0.291304
ARMC6	1.67919	0.0963331	2.48409	0.0164553	3.67774	0.000379285	2.40102	0.0188282	7.9352	9.38818e-12	8.01882	6.39547e-11
ARMC7	3.18221	0.00196401	0.832695	0.409057	4.78926	5.75006e-06	4.97954	3.96039e-06	3.00277	0.00354573	1.78257	0.0799825
ARMC8	1.79446	0.0758556	-0.254234	0.800379	3.96059	0.000139413	1.09353	0.277662	1.33847	0.184441	-0.0709635	0.943675
ARMC9	-1.40139	0.164289	0.862272	0.392738	-2.68725	0.00842616	-1.57959	0.118408	-2.00357	0.0484186	-1.11314	0.270323
ARMCX1	0.986975	0.32611	-0.465956	0.643311	0.542702	0.58853	-1.23408	0.221027	0.14574	0.884485	-0.9021	0.3708
ARMCX2	0.426523	0.670672	-0.652198	0.517321	1.59914	0.112914	0.510695	0.611065	0.29828	0.766244	-1.03989	0.302784
ARMCX3	2.18602	0.0312201	0.0950835	0.924636	1.00588	0.316879	-0.0768383	0.938957	-2.01844	0.0468147	-2.85482	0.00599512
ARMCX4	-2.6248	0.0100733	-1.84257	0.0714469	-3.23879	0.00162504	-1.02313	0.309534	-3.17432	0.0021156	-0.724279	0.471857
ARMCX5	2.52805	0.0130845	1.66918	0.101459	4.58032	1.32848e-05	1.31202	0.193515	4.47364	2.4529e-05	2.09582	0.0405499
ARMCX6	3.72302	0.000330347	0.465428	0.643687	2.32839	0.0218845	0.794507	0.429407	2.5343	0.0131696	0.503345	0.616662
ARNT	-2.65036	0.00939015	-1.45906	0.150928	-4.07254	9.26066e-05	-3.56906	0.000629038	-4.16664	7.60904e-05	-5.94555	1.76601e-07
ARNT2	-1.64308	0.103604	-2.85569	0.00628139	0.532756	0.595373	-0.305296	0.760986	1.283	0.203106	-0.414058	0.680385
ARNTL	2.75818	0.00694726	0.0434699	0.965504	0.986249	0.326368	-2.124	0.036967	-4.68524	1.09684e-05	-6.40073	3.14823e-08
ARNTL2	0.12141	0.903618	0.665363	0.508938	1.87824	0.0632323	2.00999	0.0480287	1.83769	0.0697297	-0.16645	0.868392
ARPC1A	-1.23515	0.219757	-0.708338	0.482091	-2.09935	0.0382787	0.0338483	0.973088	-1.28892	0.201049	-0.275111	0.784226
ARPC1B	5.01124	2.43141e-06	4.18674	0.000117232	3.41735	0.000912605	0.386152	0.700477	-2.63742	0.00999207	-3.46704	0.00100776
ARPC2	1.72702	0.0873463	0.275183	0.784333	2.05293	0.0426645	-1.66046	0.100998	-1.69169	0.0945029	-4.80794	1.15288e-05
ARPC5	3.45839	0.000808697	1.54448	0.128907	3.51925	0.000650528	0.0794364	0.936897	0.350628	0.726766	-2.9294	0.00487637
ARPC5L	3.44678	0.000840249	1.68722	0.0979185	4.2344	5.06245e-05	0.718888	0.474444	2.39876	0.0187196	-0.288109	0.774308
ARPM1	4.8711	4.31624e-06	-0.671433	0.505098	3.97443	0.000132591	-0.0368012	0.970741	5.41207	6.0493e-07	1.09218	0.279349
ARPP19	2.05806	0.0422662	-0.428595	0.670096	3.21806	0.00173528	-0.461788	0.64557	1.51685	0.13315	-1.17302	0.245665
ARPP21	-2.45274	0.0159636	-0.758194	0.451966	-4.12265	7.69336e-05	-3.59889	0.00057064	-3.53495	0.000673576	-2.1863	0.0329147
ARR3	0.757358	0.450672	-1.78884	0.0798234	0.931482	0.353826	1.50913	0.135467	1.89676	0.0613804	1.38342	0.171931
ARRB1	-3.34835	0.00115846	-2.82485	0.00682353	-5.41603	4.13981e-07	-3.80464	0.000287681	-4.72852	9.28188e-06	-2.28703	0.0259268
ARRB2	-1.8114	0.0731736	-0.184193	0.854622	-1.14687	0.254144	-2.41847	0.0180125	-0.951499	0.344147	-2.17163	0.0340596
ARRDC1	-0.344804	0.730988	0.390111	0.698145	-0.677601	0.499574	-1.06527	0.290171	-4.9774	3.50285e-06	-5.17559	3.07027e-06
ARRDC2	3.02546	0.00317811	2.18905	0.0333875	1.02168	0.309373	-0.499208	0.619094	-3.67393	0.000424652	-3.47258	0.000990768
ARRDC3	1.02945	0.305828	-0.120198	0.904818	1.85687	0.0662433	-1.88398	0.0634439	-0.469534	0.639934	-2.50317	0.0151985
ARRDC4	2.0599	0.0420867	0.374298	0.709798	2.46489	0.0153927	1.42161	0.159285	1.00099	0.319775	-0.554573	0.581357
ARSA	0.162082	0.871579	-0.254561	0.800128	-1.70828	0.0906562	-0.658263	0.512385	-5.1458	1.78778e-06	-2.68111	0.0095799
ARSB	-0.331951	0.740643	1.46449	0.149447	-0.972276	0.333236	-1.52581	0.131264	-1.27041	0.207531	-1.01539	0.31421
ARSD	-5.09033	1.75213e-06	-1.65361	0.104601	-2.6455	0.00946136	-0.844826	0.400895	-4.14387	8.26074e-05	-2.81268	0.00672795
ARSE	-3.24538	0.00161024	0.202106	0.840671	-3.41525	0.000918931	-2.30444	0.0239676	-1.85949	0.0665445	-2.34297	0.0226443
ARSF	-5.55596	2.41859e-07	-1.97033	0.0544643	-3.63759	0.000435478	-1.91452	0.0593679	-5.26955	1.08359e-06	-3.97268	0.000201958
ARSG	4.10624	8.39465e-05	5.35161	2.29285e-06	0.746845	0.456892	3.15718	0.00229497	6.49404	6.02529e-09	6.93399	4.09846e-09
ARSJ	3.78032	0.000270621	4.70813	2.08828e-05	0.631214	0.529327	-0.248526	0.804406	0.977436	0.331228	-0.16004	0.873415
ARSK	0.328146	0.743509	1.27089	0.209769	-0.47909	0.63291	-2.74773	0.0075118	0.882577	0.380045	-0.445802	0.657429
ART1	1.76304	0.0810426	0.609036	0.545314	2.48304	0.0146736	-0.300685	0.764486	1.75597	0.0828273	0.815747	0.418041
ART3	1.58906	0.1153	0.426196	0.671831	0.792589	0.429875	-1.92504	0.058017	1.24726	0.215854	-1.34855	0.182814
ART4	1.0753	0.284907	0.806517	0.423842	0.0874625	0.930477	0.0449169	0.964293	-4.09443	9.86614e-05	-3.58334	0.000703221
ART5	3.15012	0.00217023	-1.10546	0.27436	2.93034	0.00418693	0.0666433	0.947043	3.11902	0.00250383	0.772619	0.44294
ARTN	-0.609659	0.543513	-0.73543	0.465584	-0.732507	0.465556	0.718839	0.474474	-0.962934	0.338412	0.981201	0.33064
ARV1	0.877235	0.382527	-0.120724	0.904404	0.740264	0.460857	-1.67068	0.0989526	1.16848	0.246001	-0.877259	0.384029
ARVCF	-3.67839	0.000385347	-5.39105	1.99823e-06	-0.391488	0.696261	-1.89966	0.0613228	-4.45966	2.58505e-05	-5.13605	3.545e-06
ARVP6125	1.28251	0.202719	1.0653	0.291963	2.68617	0.00845165	3.07099	0.00297128	2.48487	0.0149938	1.90967	0.0612132
ARX	1.36572	0.175186	-0.526428	0.600966	1.41617	0.159802	0.269223	0.788498	2.19706	0.0308379	1.41133	0.163583
AS3MT	-2.83293	0.00561037	-1.86896	0.0676114	-3.10818	0.00244536	-1.80393	0.075258	-0.84458	0.400803	-0.34362	0.732396
ASAH1	1.44675	0.15119	0.579248	0.565075	-0.818452	0.415026	-2.22675	0.0289658	-3.65888	0.000446642	-4.05773	0.000152534
ASAH2	1.81176	0.0731171	-0.855048	0.396686	1.94227	0.0548893	0.915552	0.362836	2.19856	0.0307272	1.11836	0.268106
ASAM	2.87658	0.00494318	6.38781	5.89209e-08	3.32047	0.0012513	2.84728	0.00568556	8.07294	5.00953e-12	12.309	1.08634e-17
ASAP1	1.72487	0.0877356	0.680941	0.499114	-0.107978	0.914227	-0.536829	0.592975	-0.858308	0.393224	-0.15998	0.873463
ASAP1-IT	0.931889	0.353707	1.28882	0.203511	-1.29911	0.196864	-0.173846	0.862455	-1.13428	0.259984	0.974663	0.333846
ASAP2	-1.72904	0.0869839	2.01608	0.0492914	-3.95256	0.000143526	-2.90604	0.00480922	-0.0156371	0.987562	1.75133	0.0852679
ASAP3	-1.81322	0.0728911	1.06969	0.289998	-2.2954	0.0237775	0.039425	0.968656	-4.72753	9.31744e-06	-4.50392	3.35358e-05
ASB1	-0.808107	0.421006	0.905516	0.369623	-3.20129	0.00182951	-1.30262	0.19669	-2.97899	0.0038033	0.0941959	0.925284
ASB10	2.17553	0.0320197	0.241641	0.810066	3.01716	0.00322895	2.30804	0.023756	3.01503	0.0034194	0.947223	0.347524
ASB11	-0.354522	0.723718	-0.308344	0.759128	0.770751	0.442654	-0.061406	0.951199	0.945213	0.347327	0.323804	0.747272
ASB12	1.69594	0.0931043	1.32743	0.190519	1.00266	0.318422	0.963719	0.338284	1.28458	0.202557	0.905423	0.369053
ASB13	2.63119	0.00989846	2.40154	0.020164	0.473373	0.636969	1.60588	0.112504	3.57644	0.000587599	3.08556	0.00313292
ASB14	1.13549	0.258968	-1.53127	0.132134	1.51955	0.131749	0.0214244	0.982964	1.10473	0.272506	-0.905613	0.368953
ASB15	0.289945	0.772477	-2.32295	0.024377	1.78574	0.0771428	-0.646936	0.519649	0.26439	0.792143	-2.33902	0.0228633
ASB16	-0.258196	0.796802	-0.824335	0.413744	0.648312	0.518255	1.9613	0.0535565	0.0527202	0.958083	0.387635	0.69973
ASB17	0.392828	0.695309	-1.24576	0.218775	0.894303	0.373286	-1.73058	0.0876388	0.855562	0.394733	-0.707985	0.48184
ASB18	1.7546	0.0824853	0.090941	0.92791	1.58714	0.115607	0.0798595	0.936562	2.54052	0.0129546	1.43328	0.157242
ASB2	2.70032	0.008175	-1.56728	0.123484	3.65622	0.000408488	1.31337	0.193063	0.825765	0.411334	-1.65736	0.102941
ASB3	-2.96209	0.00384262	-1.40849	0.1653	-2.33491	0.0215264	-2.40618	0.0185837	-2.44389	0.016675	-2.16972	0.0342109
ASB4	0.37402	0.709206	-1.12348	0.266708	-0.361376	0.718573	-1.09763	0.275878	-1.02651	0.307668	-1.28941	0.202463
ASB5	1.66983	0.0981763	0.555989	0.580748	1.90747	0.0593003	0.167507	0.867422	3.05246	0.00305896	1.2446	0.218372
ASB6	0.833139	0.406813	0.890342	0.377633	2.36297	0.0200441	0.91376	0.363771	1.28749	0.201546	0.933333	0.354585
ASB7	-2.00591	0.0476506	0.0101073	0.991977	0.224186	0.823065	1.03866	0.302298	-0.951694	0.344049	0.680876	0.498707
ASB8	-1.85392	0.0667897	-1.78499	0.0804546	0.532389	0.595626	-1.23064	0.222305	-1.83799	0.0696853	-2.82918	0.0064317
ASB9P1	0.774361	0.440601	0.484073	0.630491	-0.22007	0.826261	-2.0153	0.0474564	-0.622167	0.535558	-1.26232	0.211972
ASCC1	1.22505	0.223522	-0.694412	0.490703	-0.218773	0.827268	-1.17991	0.241766	-0.0811607	0.935512	-0.542824	0.589368
ASCC2	0.0793718	0.9369	0.0486569	0.961391	1.5127	0.133479	-0.523188	0.602386	0.954803	0.342484	-0.346283	0.730405
ASCC3	0.182631	0.855469	-0.574605	0.568187	2.0955	0.0386272	-1.31627	0.192092	0.108923	0.91353	-0.869644	0.388142
ASCL1	1.15094	0.252587	0.940646	0.351501	3.4623	0.00078668	2.70388	0.00847512	4.53303	1.96074e-05	4.89515	8.44804e-06
ASCL2	2.13624	0.0351763	-0.575779	0.5674	1.46975	0.144738	0.273256	0.785407	1.53752	0.128016	0.773228	0.442582
ASCL3	0.784823	0.43447	0.0803387	0.936295	0.762481	0.44755	-0.097512	0.92258	1.55439	0.123942	-0.551288	0.583591
ASCL4	0.274151	0.784552	-0.729674	0.469063	0.331212	0.74117	0.103334	0.917973	1.20262	0.232583	-0.460709	0.64676
ASF1A	-2.00022	0.0482722	-2.62125	0.0116364	0.397393	0.691916	-1.62304	0.108776	-0.0802377	0.936244	-2.0378	0.0462208
ASF1B	1.5147	0.133101	-0.198547	0.843438	8.83946	3.20673e-14	4.59306	1.72719e-05	6.34788	1.14115e-08	2.44935	0.0174082
ASGR1	-3.48812	0.000732884	-4.251	9.51495e-05	-2.96698	0.00375447	-2.66497	0.00942291	-1.52504	0.131096	-4.16832	0.00010546
ASGR2	0.0667889	0.946887	-0.672023	0.504726	-0.582823	0.561311	1.00137	0.319868	0.554559	0.580706	-0.890513	0.376934
ASH1L	-1.79096	0.0764189	0.281987	0.779141	-1.30613	0.194475	0.353234	0.724904	-2.02587	0.0460304	-0.577868	0.565629
ASH2L	-3.07235	0.00275668	-1.97641	0.0537518	-1.60923	0.110688	-2.46063	0.0161704	-2.16281	0.033468	-2.10542	0.0396727
ASIP	1.12273	0.264322	-0.258189	0.797343	2.95448	0.00389716	0.777928	0.439058	4.86429	5.47089e-06	0.811075	0.420696
ASL	0.506454	0.613687	-0.750194	0.456725	-2.78681	0.00635967	-2.87912	0.005194	-1.62275	0.108482	-1.89617	0.0630103
ASNA1	3.19023	0.00191538	0.552638	0.583024	3.85615	0.000202866	-0.156598	0.875982	2.7253	0.00785168	-0.163936	0.870361
ASNS	0.822814	0.412632	0.308425	0.759066	2.8117	0.00592111	1.12717	0.263264	5.63521	2.39768e-07	3.21278	0.0021638
ASNSD1	-1.28692	0.201185	-0.0234765	0.981365	0.735745	0.463591	-1.44702	0.152059	2.46023	0.0159854	1.05975	0.293727
ASPA	2.15984	0.03325	2.43611	0.018528	-1.7988	0.0750376	-2.36204	0.0207708	-5.70024	1.82589e-07	-2.89136	0.00542021
ASPDH	1.71805	0.0889778	3.14698	0.0028056	1.92389	0.057183	2.90446	0.00483097	4.15179	8.02827e-05	5.15706	3.28439e-06
ASPH	2.40204	0.0182081	5.0596	6.30389e-06	-0.993144	0.323013	-1.29526	0.199204	1.1213	0.265433	1.22181	0.226808
ASPHD1	-1.75759	0.0819729	-2.21326	0.0315673	-0.934613	0.352217	-1.51197	0.134743	2.09515	0.0392427	2.08846	0.0412345
ASPHD2	-0.276198	0.782984	-2.00002	0.0510566	1.53631	0.12759	-1.17776	0.242618	0.187976	0.85136	-1.75407	0.0847937
ASPM	-0.135993	0.892109	0.89587	0.374703	7.29836	6.80029e-11	4.5274	2.20579e-05	8.40917	1.07746e-12	5.58568	6.78881e-07
ASPN	3.30239	0.00134301	3.66668	0.000604417	-0.779861	0.437296	-2.9775	0.00391181	-1.46488	0.146776	-1.27277	0.208267
ASPRV1	-2.18454	0.0313319	-1.89016	0.064659	-1.95679	0.053133	0.547783	0.585467	-4.3535	3.84004e-05	-2.13007	0.0374947
ASPSCR1	1.52356	0.130871	0.949963	0.346793	3.39669	0.000976645	3.30825	0.00144383	2.95388	0.00409388	2.61846	0.0112948
ASRGL1	-0.779698	0.437467	-1.62913	0.1097	6.37188	5.61616e-09	3.17096	0.00220119	1.81314	0.0734694	-0.470777	0.639597
ASTE1	1.83838	0.0690658	0.361825	0.719038	3.69692	0.000354933	1.02888	0.306845	1.772	0.0801098	-0.730726	0.46794
ASTL	1.78001	0.0782054	1.67696	0.0999189	0.400948	0.689305	0.872951	0.385476	1.04318	0.299932	2.19059	0.0325864
ASTN1	-4.3312	3.61611e-05	-2.00584	0.0504112	-6.27416	8.83486e-09	-3.28159	0.0015684	-7.39514	1.08789e-10	-2.08312	0.0417367
ASTN2	-3.02681	0.00316516	-1.00956	0.317666	-4.62542	1.11081e-05	-3.44011	0.000953155	-3.36076	0.00118218	-2.73035	0.00840306
ASXL1	-2.19637	0.0304482	-0.250608	0.803165	-0.899722	0.370408	-1.76137	0.0822515	0.370364	0.712066	0.413509	0.680785
ASXL2	0.664148	0.508171	1.13313	0.262672	1.61806	0.108769	2.21841	0.0295532	-0.47717	0.634511	-0.650954	0.517692
ASZ1	-0.229008	0.819345	-0.962125	0.340711	0.809614	0.420065	-0.633191	0.528535	0.0724669	0.942407	-0.913221	0.364973
ATAD1	2.76155	0.00688116	-0.815223	0.418889	4.38447	2.85516e-05	0.377258	0.707047	1.64567	0.103659	-0.753784	0.454081
ATAD2	0.0345524	0.972508	0.812723	0.420308	8.0225	1.92596e-12	4.29071	5.24876e-05	7.00034	6.40561e-10	4.49217	3.49306e-05
ATAD2B	-2.32531	0.0221389	-0.871829	0.387553	-1.79692	0.0753379	-1.10076	0.27452	-2.57222	0.011908	-2.26373	0.0274147
ATAD3A	2.83611	0.00555915	0.552833	0.582891	2.9754	0.00366114	0.993999	0.323419	2.11603	0.0373756	1.00547	0.318919
ATAD3C	-0.262646	0.793381	0.354604	0.724408	0.0396941	0.968415	0.253137	0.800855	0.596698	0.552353	0.528859	0.598957
ATAD5	-2.29081	0.0241389	-0.904426	0.370195	3.04778	0.00294254	1.5797	0.118384	3.82994	0.000249802	2.39561	0.0198991
ATAT1	-4.41229	2.65199e-05	-4.75812	1.76385e-05	-0.982363	0.328268	-2.34705	0.021564	-4.38195	3.45541e-05	-5.55788	7.52723e-07
ATCAY	-1.97237	0.051415	-2.16673	0.0351464	-0.763356	0.44703	-1.62981	0.107334	0.0759804	0.93962	0.825605	0.412471
ATE1	0.698454	0.486565	-1.05732	0.295549	1.52597	0.130143	-0.386475	0.700239	-0.228034	0.820188	-1.43927	0.155543
ATF1	2.70066	0.00816729	0.668249	0.50711	4.05135	0.000100117	-0.434549	0.665137	3.51634	0.000715909	-0.11191	0.911288
ATF2	-2.84595	0.00540329	-3.4803	0.00106208	-0.743024	0.459192	-3.90277	0.000205934	-2.6067	0.010857	-4.47144	3.75283e-05
ATF3	1.44809	0.150816	1.49326	0.141782	-3.38223	0.00102398	-3.35586	0.00124423	-3.1535	0.00225464	-1.29221	0.201499
ATF4	2.8884	0.00477551	2.44798	0.0179944	1.56636	0.120392	-0.507443	0.613333	3.4793	0.000807752	2.14191	0.0364868
ATF5	2.57616	0.0114985	4.04722	0.000183645	1.46273	0.146646	2.642	0.0100265	3.45866	0.000863646	4.15329	0.000110916
ATF6	3.59075	0.000519579	3.2353	0.0021795	2.72704	0.00753627	1.1985	0.234496	1.28585	0.202116	0.644526	0.52182
ATF7	-2.95522	0.00392193	-0.666224	0.508392	-2.1084	0.0374706	-1.52643	0.13111	-4.4966	2.24984e-05	-4.28974	6.99765e-05
ATF7IP	-2.54481	0.0125109	-1.21212	0.231277	-0.481963	0.630875	-1.142	0.257087	-0.000217736	0.999827	0.153835	0.878283
ATF7IP2	4.02801	0.00011179	1.57364	0.122006	2.46731	0.0152952	2.03157	0.0457399	1.13966	0.257745	-0.787367	0.434329
ATG10	-1.03883	0.301465	-2.35952	0.0223271	0.143646	0.886067	-1.81867	0.0729533	-1.83015	0.0708615	-4.45085	4.02955e-05
ATG12	-0.0065717	0.99477	-0.87502	0.385832	0.29883	0.765683	-2.57877	0.0118742	-0.138851	0.889908	-1.42574	0.159396
ATG13	0.84855	0.398221	-0.0011696	0.999072	2.62316	0.0100613	1.29136	0.200546	-1.79369	0.0765485	-2.43756	0.0179292
ATG14	-0.133037	0.89444	-1.72768	0.0903437	-0.0056727	0.995485	-2.36891	0.0204161	-3.50448	0.00074417	-4.48194	3.61893e-05
ATG16L1	-1.21692	0.226586	-1.15631	0.253159	-1.5783	0.117623	-2.17491	0.0327898	-2.64804	0.00970774	-3.51458	0.000870581
ATG2B	-1.17584	0.242538	0.355839	0.723488	-0.547854	0.585001	-0.572968	0.56838	-1.29774	0.198016	-0.555549	0.580693
ATG3	3.5652	0.000566373	2.10257	0.0406642	3.59041	0.000511576	0.588537	0.55794	0.634307	0.527646	-1.90017	0.0624732
ATG4A	1.97703	0.0508774	0.202262	0.840549	1.56722	0.12019	1.0409	0.301266	-1.27308	0.206586	-4.02648	0.00016916
ATG4C	0.776237	0.439497	-0.217617	0.828631	1.88996	0.0616306	-0.383307	0.702577	-0.559447	0.577381	-2.07463	0.0425467
ATG4D	1.91972	0.0578315	0.164131	0.870303	3.79511	0.000251832	1.32177	0.190264	4.97686	3.5104e-06	3.80223	0.000351448
ATG5	1.40513	0.163178	-0.00693746	0.994493	1.26577	0.208508	-2.46125	0.0161444	1.1269	0.263071	-0.582323	0.562645
ATG7	0.183183	0.855037	2.15182	0.0363658	-2.70441	0.00803121	-2.37156	0.0202806	-2.52186	0.0136088	-0.899711	0.372059
ATG9A	-1.1908	0.236638	0.349381	0.7283	-2.0032	0.0478346	-1.39499	0.167135	-2.7294	0.00776273	-0.35477	0.724071
ATG9B	3.24181	0.00162852	1.20578	0.233693	2.42616	0.0170326	2.64785	0.00986942	2.69126	0.00862547	2.39904	0.0197314
ATHL1	2.4059	0.0180276	0.760158	0.450803	1.17748	0.24177	1.18871	0.238303	-1.95054	0.0545283	-1.82737	0.0728801
ATIC	-0.549017	0.584255	2.6214	0.0116319	0.312795	0.755081	1.32687	0.188577	6.81951	1.4331e-09	8.37048	1.67207e-11
ATL1	-1.1483	0.253668	-1.58699	0.118947	-0.610705	0.542767	-1.95509	0.0542991	-0.989863	0.325153	-1.68423	0.0976071
ATL2	-0.498887	0.618988	-0.482916	0.631306	1.65016	0.102017	-0.441125	0.660392	1.3113	0.193417	-0.494838	0.622616
ATL3	3.35449	0.00113569	2.14536	0.0369062	-0.00339719	0.997296	-0.102544	0.918598	-3.12236	0.0024786	-4.28499	7.11146e-05
ATM	0.000834031	0.999336	0.860291	0.393818	-1.70169	0.0918898	-1.75829	0.0827773	1.00224	0.319174	1.50155	0.138733
ATMIN	3.99987	0.000123822	-0.0875048	0.930627	4.73113	7.27406e-06	0.502981	0.616452	1.85647	0.0669777	-2.62726	0.0110383
ATN1	-5.19431	1.13436e-06	-1.9784	0.0535196	-4.72027	7.59937e-06	-2.55474	0.0126537	-4.71711	9.70029e-06	-1.83842	0.0712126
ATOH1	1.81032	0.0733423	0.164607	0.869931	1.46818	0.145163	-1.54946	0.125481	1.49003	0.140054	-0.0986804	0.921738
ATOH7	1.21204	0.228439	-0.976682	0.333524	1.03482	0.303224	-0.184078	0.854449	1.47982	0.142753	-0.377495	0.707207
ATOH8	2.71398	0.00786865	0.897577	0.3738	1.84925	0.0673463	0.408941	0.683748	1.53446	0.128767	0.919602	0.361656
ATOX1	3.54333	0.000609566	0.765784	0.447478	3.46595	0.000777198	0.259633	0.795859	0.316557	0.752384	-2.72118	0.00861168
ATP10A	1.87787	0.0634036	1.77029	0.0829004	-0.564221	0.573855	-1.08931	0.279504	-3.13093	0.002415	-1.76851	0.0823264
ATP10B	1.82296	0.0713894	0.22135	0.825739	1.30958	0.19331	-0.342676	0.732801	0.726402	0.469661	-0.229698	0.819149
ATP10D	2.34643	0.0209886	3.71158	0.0005266	-0.642847	0.52178	-0.156965	0.875694	3.12987	0.00242277	4.57148	2.6513e-05
ATP11B	1.86179	0.0656606	1.40678	0.165804	1.07152	0.28649	1.02626	0.308068	-0.992582	0.323834	-1.08074	0.284364
ATP11C	1.89631	0.0608945	2.71113	0.0092194	4.16529	6.56311e-05	1.9124	0.0596437	6.18844	2.27904e-08	4.72189	1.56379e-05
ATP12A	2.40593	0.0180263	-0.427993	0.670531	2.67248	0.00877988	0.462234	0.645252	3.63398	0.000485415	0.0679234	0.946084
ATP13A1	1.74271	0.0845537	2.91042	0.00541636	3.22025	0.00172327	2.75009	0.00746292	2.8572	0.00541493	3.24832	0.00194836
ATP13A2	-1.04669	0.297842	-3.26562	0.0019969	-1.11768	0.266357	-1.38439	0.170344	-6.79396	1.60512e-09	-6.61739	1.37737e-08
ATP13A3	1.97273	0.0513732	2.64535	0.0109369	1.80591	0.0739112	0.485953	0.628417	2.49391	0.014644	2.48687	0.0158391
ATP13A4	-0.393325	0.694943	-3.69618	0.000552131	-0.973293	0.332733	-1.46948	0.145885	-1.48434	0.141554	-3.96921	0.000204271
ATP13A5	0.0392267	0.96879	-0.947039	0.348266	0.18011	0.857427	0.0355758	0.971715	0.886479	0.377952	-0.46219	0.645705
ATP1A1	-0.322278	0.747935	-0.159862	0.873647	-1.03957	0.301024	0.472196	0.638158	-4.11084	9.30256e-05	-3.17719	0.00240187
ATP1A2	1.37773	0.171456	0.566814	0.573428	-2.36783	0.019797	-2.62191	0.0105831	-3.90259	0.000194241	-2.56742	0.0128942
ATP1A3	-1.42545	0.157237	-1.14044	0.259648	-0.564871	0.573414	-0.703742	0.483772	-2.272	0.025705	-1.471	0.14679
ATP1A4	2.63044	0.00991878	-1.35938	0.180249	3.00737	0.0033258	0.126972	0.899302	2.11488	0.0374758	-0.465554	0.643308
ATP1B1	0.394655	0.693964	-1.05327	0.297382	-0.692485	0.490222	-1.65326	0.102458	-3.05385	0.00304633	-4.22147	8.81846e-05
ATP1B2	1.48952	0.139596	0.209833	0.834668	-1.10926	0.269952	0.253869	0.800291	-2.97292	0.00387165	-2.36166	0.0216332
ATP1B3	2.67569	0.00875493	1.44673	0.15434	1.18456	0.238972	-0.973103	0.33363	1.7582	0.0824443	1.42643	0.159198
ATP1B4	1.40004	0.164693	-1.1871	0.240912	0.929098	0.355053	0.0990954	0.921327	1.91846	0.0585326	-0.162734	0.871303
ATP2A1	3.12293	0.00236067	-0.590516	0.557558	5.71572	1.11191e-07	2.62586	0.0104715	5.16648	1.64485e-06	0.797181	0.428654
ATP2A2	-3.06273	0.00283872	0.376556	0.708129	-0.80468	0.422894	1.08374	0.281951	-2.46451	0.0158089	0.657417	0.513559
ATP2A3	1.1667	0.246192	0.0299742	0.976209	1.39725	0.1654	1.40932	0.162873	-6.61472	3.54525e-09	-4.06019	0.000151293
ATP2B1	1.35555	0.178389	2.11088	0.0399095	1.06982	0.287248	0.260758	0.794994	1.64739	0.103304	1.91849	0.0600618
ATP2B2	-2.21077	0.0294014	0.0627826	0.950195	-3.27867	0.00143114	-1.25387	0.213785	-0.724992	0.470521	0.864579	0.390894
ATP2B3	1.79038	0.0765123	3.19497	0.00244702	0.74142	0.460159	1.92749	0.057706	4.2727	5.17171e-05	5.42922	1.21173e-06
ATP2B4	-1.84617	0.0679175	-1.82374	0.0742931	-7.67074	1.09856e-11	-4.89724	5.44382e-06	-13.0526	1.02163e-21	-8.13613	4.08528e-11
ATP2C1	-0.905587	0.367398	-1.19734	0.236934	0.344952	0.730848	-1.62401	0.108569	-1.28796	0.201383	-1.19368	0.237547
ATP2C2	2.29936	0.0236293	-0.887346	0.379228	3.1258	0.00231574	2.0066	0.0483974	3.14123	0.00234051	1.09797	0.276835
ATP4A	-0.0109761	0.991265	-1.81458	0.0757119	0.280558	0.779623	0.384694	0.701553	0.33892	0.735537	0.238832	0.812092
ATP4B	2.20526	0.0297984	-0.932735	0.35553	1.79374	0.0758464	-0.445901	0.656953	2.8448	0.00561009	-0.907684	0.367867
ATP5A1	-0.10374	0.91759	-0.789515	0.433615	2.50463	0.013858	0.275762	0.783489	2.89289	0.00488718	2.60936	0.0115661
ATP5B	0.694135	0.489257	-0.486155	0.629025	4.37983	2.90671e-05	0.36848	0.713554	3.07874	0.00282738	1.27953	0.205896
ATP5C1	1.88307	0.0626868	0.528785	0.599342	3.37285	0.00105579	-0.569212	0.570913	4.00988	0.000133296	0.962512	0.339858
ATP5D	4.02549	0.00011282	0.0785514	0.937709	3.40882	0.000938561	-0.610061	0.543665	5.26819	1.08963e-06	2.29296	0.0255597
ATP5E	0.0102241	0.991863	-0.297685	0.767202	1.09745	0.275054	-0.845619	0.400455	1.35454	0.179284	1.25546	0.214434
ATP5F1	0.523532	0.601798	1.31209	0.195604	0.633909	0.527573	1.23755	0.219742	0.359314	0.720284	1.92934	0.0586721
ATP5G1	2.88373	0.00484112	1.34117	0.186049	4.3637	3.09297e-05	4.38001	3.79515e-05	4.64581	1.27612e-05	3.64885	0.000572652
ATP5G2	0.464318	0.64346	1.7921	0.0792918	1.24007	0.217824	2.64867	0.00984775	3.67397	0.000424592	5.50587	9.12777e-07
ATP5G3	-0.111587	0.911382	1.16935	0.24792	0.255989	0.79848	-0.746881	0.457471	2.31798	0.0229423	2.21769	0.0305776
ATP5H	0.959881	0.339502	0.110642	0.912353	2.65488	0.0092192	3.49922	0.000788701	2.7852	0.00664202	1.9722	0.0534462
ATP5I	3.08258	0.00267197	4.41129	5.62472e-05	1.92714	0.0567719	1.51708	0.13345	5.6259	2.49285e-07	6.63463	1.28957e-08
ATP5J	2.48343	0.0147279	1.30994	0.196326	2.8034	0.00606415	0.502688	0.616657	5.90464	7.6961e-08	3.1862	0.00233936
ATP5L	-0.635764	0.526428	-0.533778	0.595909	-1.7732	0.0792097	-2.74915	0.00748242	0.294303	0.76927	-0.658243	0.513032
ATP5L2	-0.942375	0.348342	0.280437	0.780323	-1.67925	0.0961935	0.708663	0.48073	-1.98994	0.0499304	0.42822	0.670105
ATP5O	2.73401	0.007438	1.46829	0.148416	3.3869	0.00100844	1.55587	0.123948	4.88888	4.96751e-06	2.91013	0.00514517
ATP5S	-0.292486	0.770539	-0.426788	0.671403	1.15089	0.252494	0.376245	0.707797	2.0225	0.0463842	1.00416	0.319545
ATP5SL	0.946919	0.346033	0.101779	0.919348	3.40172	0.000960673	-0.739008	0.462209	3.42997	0.000947425	1.74244	0.0868252
ATP6AP1	0.553016	0.581524	-0.381195	0.704706	0.976377	0.33121	0.209317	0.834769	-3.52748	0.000690283	-1.91802	0.060123
ATP6AP2	3.32566	0.00124639	1.56875	0.123142	2.13657	0.0350489	0.299356	0.765496	-1.93171	0.0568495	-2.15714	0.035225
ATP6V0A1	1.45258	0.149569	-0.401868	0.689528	1.83183	0.0699235	-0.792027	0.430843	1.04671	0.298311	0.11097	0.91203
ATP6V0A2	2.09908	0.0384068	0.567622	0.572883	3.24184	0.0016094	0.657926	0.5126	4.50068	2.21557e-05	3.35029	0.00143698
ATP6V0A4	0.929317	0.355032	-0.0409014	0.967541	0.659404	0.511137	0.683124	0.496633	1.11748	0.267051	0.0694312	0.944889
ATP6V0B	-0.124593	0.901104	-2.70102	0.00946621	-0.527539	0.598976	-2.30547	0.0239066	-4.28163	5.00515e-05	-5.20767	2.73156e-06
ATP6V0D1	0.657728	0.512271	-1.44254	0.155513	1.48826	0.139799	0.141233	0.888065	-4.70648	1.01065e-05	-5.68117	4.75755e-07
ATP6V0D2	-0.332107	0.740525	0.704415	0.484509	0.244885	0.807042	-1.20709	0.231189	-0.128775	0.897851	0.0716815	0.943106
ATP6V0E1	4.4799	2.04252e-05	2.78664	0.0075555	2.88043	0.00484993	0.890841	0.375863	-2.02649	0.0459648	-2.69462	0.00924291
ATP6V0E2	1.82519	0.0710497	-3.19144	0.0024718	2.94266	0.00403668	-0.179324	0.858167	-0.662534	0.509487	-5.10684	3.94135e-06
ATP6V1A	0.951048	0.343944	-1.46057	0.150515	0.906201	0.366986	-1.66827	0.0994314	-3.06865	0.00291428	-4.00817	0.000179697
ATP6V1B1	2.26741	0.0255844	2.9321	0.00510535	1.92473	0.0570773	0.43767	0.662883	6.14198	2.78504e-08	4.17937	0.00010162
ATP6V1B2	-0.504829	0.614824	-3.49974	0.00100211	1.0494	0.296498	-2.93234	0.00445886	-4.23322	5.97487e-05	-5.67461	4.87541e-07
ATP6V1C1	0.241771	0.809468	-1.25695	0.21473	-0.00896163	0.992867	-1.15763	0.250688	-4.17027	7.50986e-05	-5.38857	1.4076e-06
ATP6V1C2	0.551361	0.582654	0.491097	0.625551	0.0626179	0.950195	2.55029	0.012803	0.213371	0.831567	1.74973	0.0855477
ATP6V1D	1.72009	0.0886054	0.115781	0.908299	1.92755	0.05672	0.221043	0.82566	-0.288936	0.77336	-2.04215	0.0457734
ATP6V1E1	1.55104	0.124148	-0.936014	0.353856	0.81256	0.418381	-1.29981	0.197645	-1.32994	0.187226	-3.42098	0.00116007
ATP6V1E2	-3.15619	0.00212974	1.13038	0.26382	-3.15976	0.00208375	2.42232	0.0178367	-0.634599	0.527456	2.59967	0.0118615
ATP6V1F	2.76472	0.00681955	-1.23742	0.221828	3.73585	0.000310005	0.799302	0.426639	2.10133	0.0386822	-1.73623	0.0879258
ATP6V1G1	3.46058	0.000802866	-1.46845	0.148373	3.4791	0.000743943	-0.789215	0.432474	0.980522	0.329713	-4.24571	8.12455e-05
ATP6V1G3	-0.234152	0.81536	-0.0510964	0.959456	0.321615	0.748409	-0.580162	0.563544	-0.715159	0.476542	-0.881385	0.381811
ATP6V1H	-0.572952	0.568003	-1.29318	0.202011	-1.28273	0.202521	-2.6738	0.00919956	-1.96729	0.0525316	-3.00999	0.00388733
ATP7A	0.144174	0.885662	0.285586	0.776399	-0.649194	0.517687	0.0320508	0.974517	-0.399091	0.690864	0.0150216	0.988067
ATP7B	-3.54356	0.000609095	-1.10366	0.275133	-4.43319	2.36475e-05	-1.91771	0.0589548	-1.39941	0.165462	0.536067	0.593998
ATP8A1	-2.95971	0.00386998	-4.68818	2.23355e-05	-0.893169	0.37389	-2.33409	0.0222712	-3.54943	0.00064229	-5.2688	2.18485e-06
ATP8A2	-0.64867	0.518085	0.247734	0.805375	-1.17713	0.24191	1.2727	0.207054	-4.44094	2.77295e-05	-3.51153	0.000878822
ATP8B1	2.01776	0.0463787	3.58659	0.000771404	-2.20826	0.0294877	-3.19189	0.00206561	-2.44329	0.0167009	-2.25951	0.0276917
ATP8B2	-1.29182	0.199489	0.681715	0.498629	-1.8209	0.0715832	-1.00207	0.319534	-3.21804	0.00184925	-1.45302	0.151702
ATP8B3	2.95644	0.00390777	0.508108	0.613658	2.48802	0.0144818	0.865742	0.389393	2.02975	0.0456244	0.452836	0.652386
ATP8B4	2.32919	0.0219239	2.50119	0.015769	-0.328341	0.743334	0.184642	0.854009	-4.55006	1.83824e-05	-2.1513	0.0357044
ATP9B	-2.51828	0.0134294	-0.716865	0.476861	-3.36067	0.00109852	-1.68803	0.0955601	-3.21036	0.00189364	-2.01232	0.0489198
ATPAF2	-6.28551	9.32851e-09	-6.21647	1.08462e-07	-4.9977	2.44315e-06	-6.26501	2.13751e-08	-5.86865	8.96778e-08	-5.53509	8.1911e-07
ATPBD4	-0.283528	0.777376	0.977057	0.33334	-0.886693	0.377351	-0.645915	0.520306	-0.0451237	0.964118	0.0770376	0.938863
ATPIF1	-1.04306	0.299511	-3.37718	0.00144195	0.512208	0.609624	-1.17927	0.242017	-2.8064	0.00625655	-9.10429	1.04352e-12
ATR	2.12678	0.0359753	1.60889	0.114065	1.06952	0.287384	0.510227	0.611391	2.37887	0.0196897	2.55354	0.0133631
ATRIP	0.719591	0.473507	0.39188	0.696846	1.90537	0.0595755	-0.836756	0.405388	3.98562	0.000145217	1.9784	0.0527238
ATRN	-1.5917	0.114707	-0.323929	0.747371	-1.20906	0.229463	-0.022139	0.982396	-3.81337	0.000264444	-2.60689	0.0116406
ATRNL1	-3.30953	0.00131264	-2.02775	0.0480418	-1.21103	0.228709	-2.00726	0.0483254	-0.916106	0.362297	-0.187303	0.852089
ATRX	-2.50381	0.0139556	1.34364	0.185255	-2.08221	0.039851	-0.0804601	0.936086	-0.560862	0.576421	2.33371	0.0231609
ATXN1	-5.5011	3.06732e-07	-5.11046	5.29064e-06	-7.35056	5.2743e-11	-6.32432	1.6647e-08	-12.4761	1.21813e-20	-10.4371	7.65648e-15
ATXN10	-2.16054	0.0331938	-2.22107	0.0309997	0.846059	0.39952	-2.09134	0.039884	-0.317226	0.751878	-2.10995	0.0392644
ATXN2	-2.08875	0.0393487	-1.09952	0.276915	0.144395	0.885476	0.0811428	0.935545	-1.83839	0.0696263	-1.31736	0.192989
ATXN2L	1.61931	0.108627	2.40922	0.0197898	3.1782	0.00196702	2.60549	0.0110588	4.08904	0.000100584	3.70319	0.000482258
ATXN3	-0.173239	0.862825	-1.0481	0.299737	0.290442	0.772074	-3.01968	0.00345764	-0.979495	0.330217	-3.30163	0.00166278
ATXN7	-0.27285	0.785548	1.43752	0.156926	-1.98647	0.0496909	-0.430542	0.668036	-4.15832	7.84118e-05	-2.17066	0.0341362
ATXN7L1	-6.09282	2.23964e-08	-3.36937	0.00147546	-3.77016	0.000274935	-1.20164	0.233283	-9.10023	4.54738e-14	-4.01173	0.000177598
ATXN7L2	-1.76878	0.0800735	-1.64919	0.105507	-2.14729	0.0341633	-2.46373	0.0160418	0.865609	0.38923	0.579584	0.564479
ATXN7L3B	-1.90844	0.0592908	-1.33426	0.188286	1.60861	0.110823	0.138217	0.89044	-0.308226	0.758692	-0.0232908	0.9815
AUH	-2.6683	0.00893624	-2.34143	0.0233213	-3.69672	0.000355177	-2.59839	0.0112705	-4.61791	1.41993e-05	-6.25722	5.43331e-08
AUP1	0.235339	0.814442	1.87872	0.0662388	-0.166857	0.867816	0.0663602	0.947268	0.49908	0.61906	1.39901	0.167227
AURKA	1.58494	0.116235	1.01841	0.313484	8.89158	2.46513e-14	4.6092	1.62598e-05	7.87748	1.2211e-11	4.25537	7.86314e-05
AURKB	0.34608	0.730032	0.0403211	0.968001	6.33689	6.60749e-09	3.29758	0.00149253	8.11636	4.1088e-12	4.84405	1.01385e-05
AURKC	2.77836	0.0065604	0.525369	0.601696	3.79014	0.000256283	2.80968	0.00632114	2.61595	0.0105895	1.37163	0.175554
AUTS2	-5.68492	1.37767e-07	-2.77897	0.00771095	-3.12416	0.00232753	-1.79703	0.0763569	-4.30021	4.67476e-05	-2.0103	0.0491403
AVEN	-1.3498	0.180222	0.49633	0.621881	-1.73749	0.0853494	-1.30514	0.195835	0.0246709	0.980377	1.78737	0.0791944
AVIL	-3.72538	0.000327667	-2.20384	0.0322647	-3.4028	0.0009573	-0.72849	0.468582	-4.97509	3.5351e-06	-3.21233	0.00216668
AVL9	1.32282	0.189006	0.602532	0.549599	2.61688	0.010236	1.53392	0.129258	0.157363	0.875345	-0.199863	0.842299
AVP	1.78282	0.0777447	-1.59093	0.118058	2.1137	0.0370041	-0.597824	0.551759	1.86872	0.0652324	-0.528384	0.599284
AVPI1	2.52764	0.0130986	0.699486	0.487556	1.90245	0.0599612	-1.73654	0.0865746	1.68151	0.0964688	0.0778911	0.938187
AVPR1A	1.01522	0.312527	1.74434	0.0873705	-0.550494	0.583196	-1.32904	0.187863	-0.454071	0.650977	-0.595824	0.553651
AVPR2	-0.347257	0.729151	-0.874529	0.386097	-0.186454	0.852463	1.0382	0.302513	0.715859	0.476112	1.07875	0.285244
AWAT2	1.45563	0.148725	0.102931	0.918438	2.60061	0.0107015	2.19797	0.0310374	3.04644	0.00311447	1.49908	0.139371
AXIN1	1.22634	0.223039	1.15549	0.253492	2.73683	0.00733086	2.1576	0.034161	3.03366	0.00323536	1.83986	0.0709971
AXIN2	1.14269	0.25598	0.169196	0.866339	8.31015	4.58584e-13	5.36571	8.64172e-07	3.46629	0.000842561	-0.239589	0.811508
AXL	4.09926	8.61318e-05	3.97451	0.000231479	-0.386425	0.699995	-1.85572	0.0674219	-3.52831	0.000688414	-2.93005	0.0048676
AZGP1	2.61327	0.010396	1.80178	0.0777332	1.49079	0.139133	1.81975	0.0727882	2.17376	0.0326071	1.06559	0.291102
AZI2	0.976517	0.331237	0.188046	0.851617	0.457938	0.647981	-3.43033	0.000983281	1.44168	0.153202	-1.53627	0.130004
AZIN1	0.242497	0.808907	-0.804941	0.424742	2.24543	0.0269198	-1.26549	0.209612	1.55446	0.123926	0.281856	0.779075
AZU1	2.18239	0.0314947	-0.340598	0.734862	2.20615	0.0296397	0.593889	0.554374	1.8105	0.0738809	0.1228	0.902697
B2M	4.61492	1.2044e-05	4.02778	0.000195404	1.15438	0.251067	0.114112	0.909454	-5.04972	2.62731e-06	-3.84906	0.000302179
B3GALNT1	-2.03592	0.0444852	-0.537413	0.593415	-2.07187	0.0408255	-1.67393	0.0983111	0.0243474	0.980635	1.79974	0.0771953
B3GALNT2	0.913492	0.363249	4.42545	5.36777e-05	-2.62205	0.010092	-0.515346	0.607827	4.05445	0.000113794	6.18803	7.06452e-08
B3GALT1	-3.2613	0.00153098	-5.5907	9.93188e-07	-0.535161	0.593715	-3.44112	0.000950084	-3.17026	0.00214206	-6.10464	9.68774e-08
B3GALT2	0.986163	0.326507	1.57611	0.121435	-0.91464	0.362559	-1.58391	0.117422	-0.192497	0.847829	0.560839	0.577106
B3GALT4	-0.759477	0.449409	-2.24606	0.0292419	0.0629936	0.949896	-0.605834	0.546454	-3.68125	0.000414335	-5.11687	3.80058e-06
B3GALT5	-0.799138	0.426163	-0.709624	0.481301	-4.37106	3.00658e-05	-2.53423	0.0133551	-1.83769	0.06973	0.0608704	0.951675
B3GALT6	-2.1188	0.0366621	-2.75966	0.0081152	-1.56764	0.120094	-1.33571	0.185685	-2.58225	0.0115931	-2.63548	0.0108032
B3GALTL	0.304878	0.761112	0.702866	0.485465	-0.18295	0.855204	1.58951	0.116153	0.735077	0.46439	1.88879	0.0640115
B3GAT1	-6.05499	2.65641e-08	-3.78773	0.0004161	-4.20908	5.56923e-05	-1.5786	0.118636	-5.20415	1.41273e-06	-2.50449	0.0151474
B3GAT2	0.552343	0.581984	-0.238333	0.812617	0.872949	0.384761	-0.221587	0.825238	1.74479	0.0847682	2.67645	0.00969885
B3GAT3	1.90569	0.0596511	0.892752	0.376354	2.53088	0.0129207	1.44321	0.153125	-0.0895976	0.928825	0.0249859	0.980153
B3GNT1	0.804071	0.423322	-1.1616	0.251024	0.23644	0.81357	-0.498914	0.619301	-2.86215	0.00533875	-1.79203	0.0784359
B3GNT2	3.68913	0.000371365	2.14864	0.0366308	1.1239	0.26372	-1.35914	0.178176	-2.63439	0.0100745	-2.58231	0.0124075
B3GNT3	0.938276	0.350433	-0.485542	0.629456	1.15624	0.250312	1.22224	0.225443	1.81208	0.0736347	1.5178	0.134593
B3GNT4	-0.952292	0.343316	-1.76887	0.0831396	1.56568	0.120552	0.401904	0.688897	-0.634924	0.527246	0.664749	0.508892
B3GNT5	3.48725	0.000735023	5.60864	9.32516e-07	1.16972	0.244865	-0.305878	0.760545	6.199	2.17737e-08	5.91481	1.98263e-07
B3GNT6	1.84544	0.068024	-0.519834	0.60552	2.73386	0.00739275	0.759181	0.450124	1.94988	0.0546076	1.5078	0.137129
B3GNT7	-0.626905	0.532194	0.819442	0.416502	-1.00938	0.315206	0.0856413	0.93198	-2.78429	0.00665905	-2.19894	0.0319556
B3GNT8	-0.0079788	0.99365	-2.20835	0.0319295	1.62998	0.10622	-0.180881	0.856949	0.0662907	0.947308	-1.73319	0.0884692
B3GNT9	2.76565	0.00680166	0.216626	0.829399	4.05495	9.88006e-05	1.25946	0.211771	4.86843	5.38292e-06	1.44966	0.152632
B3GNTL1	-0.999812	0.319889	0.473796	0.63775	-1.54958	0.12437	0.179604	0.857948	0.67921	0.498918	2.25133	0.0282366
B4GALNT1	-2.74829	0.00714435	-2.96671	0.00464334	-0.494629	0.621936	0.0437045	0.965256	-1.98026	0.0510278	-0.580134	0.564111
B4GALNT2	0.840368	0.402769	-0.432054	0.667598	1.58453	0.116199	1.55193	0.12489	0.726284	0.469733	0.609114	0.544869
B4GALNT3	1.3349	0.185033	3.81474	0.000382561	-0.52239	0.602543	1.6435	0.104467	4.11636	9.12013e-05	6.28155	4.95375e-08
B4GALNT4	-3.73718	0.000314522	-1.48031	0.145191	-3.44452	0.000834401	-3.68655	0.00042737	1.23756	0.219413	2.35785	0.0218358
B4GALT1	2.19619	0.0304616	-1.17328	0.246355	1.93382	0.055934	-0.0854818	0.932106	0.644803	0.520855	0.724735	0.471579
B4GALT2	-1.89151	0.06154	-1.60796	0.114269	-1.39108	0.167259	-1.04193	0.300791	-1.13714	0.258793	0.261303	0.7948
B4GALT3	-1.31594	0.191295	1.39548	0.169163	-0.0218607	0.982602	0.871102	0.386478	1.84691	0.0683677	3.58532	0.000698895
B4GALT4	1.97486	0.0511273	3.42335	0.00125819	1.73904	0.085074	0.905248	0.368233	1.9415	0.0556322	1.19569	0.236768
B4GALT5	0.460608	0.646111	0.27193	0.786818	0.660993	0.510122	0.728797	0.468396	0.0848006	0.932627	-0.0195149	0.984499
B4GALT6	0.0910669	0.927627	-0.707125	0.482839	1.05826	0.29246	0.267954	0.78947	-0.132413	0.894982	-2.73377	0.00832658
B4GALT7	1.54882	0.124683	0.903326	0.370773	1.65823	0.100374	-0.345661	0.730565	0.807173	0.421902	-0.412719	0.681361
B9D1	-1.16919	0.245193	-1.89953	0.0633892	1.14857	0.253445	-0.154819	0.87738	-0.00642998	0.994885	-2.48614	0.0158684
B9D2	2.93344	0.00418339	2.31979	0.0245618	1.82332	0.0712134	-0.653933	0.515155	3.62324	0.00050311	1.44914	0.152779
BAALC	0.153485	0.878335	-0.612991	0.542717	-2.58709	0.0111028	-0.730663	0.467262	-0.856446	0.394247	-1.36753	0.176828
BAAT	0.923768	0.357899	0.0926607	0.926551	2.502	0.0139549	2.52509	0.013679	2.10724	0.0381521	1.20554	0.232977
BACE1	-5.88096	5.79222e-08	-3.66489	0.000607748	-6.76057	9.03215e-10	-6.09672	4.33002e-08	-4.67585	1.13718e-05	-2.30611	0.0247626
BACE2	2.62241	0.0101393	5.05921	6.31218e-06	0.0209966	0.98329	0.0878312	0.930245	-4.7731	7.80923e-06	-2.22557	0.0300146
BACH1	4.15311	7.0594e-05	3.0804	0.00338564	4.6509	1.00354e-05	1.22024	0.226196	1.88941	0.0623718	0.0590718	0.953102
BACH2	-3.02516	0.00318102	-1.50362	0.139097	-3.72407	0.000322992	-3.23951	0.00178575	-2.1815	0.03201	0.0330485	0.973751
BAD	2.16083	0.0331708	-1.01234	0.316351	3.5708	0.000546774	1.43945	0.154185	1.75331	0.0832864	-1.08472	0.282611
BAG1	3.29881	0.00135852	0.466594	0.642858	2.68403	0.00850214	-1.31474	0.192602	3.22793	0.00179351	-0.0927605	0.926419
BAG2	3.67691	0.000387313	1.54105	0.129738	3.05116	0.00291241	-0.867721	0.388315	2.19568	0.0309401	0.297901	0.766862
BAG3	3.0689	0.00278583	3.55526	0.000848053	-1.14139	0.256408	0.316524	0.752484	-1.81672	0.0729144	-0.191518	0.848801
BAG4	0.415576	0.678638	-0.40684	0.685898	1.55238	0.1237	-0.509609	0.611822	-0.0494747	0.960661	-0.517521	0.606795
BAG5	1.22754	0.222591	1.10518	0.274478	4.07418	9.20476e-05	1.82148	0.0725223	3.38618	0.00109022	1.94624	0.0565608
BAGE2	2.00623	0.0476161	1.45958	0.150787	3.66522	0.000396016	3.13285	0.00246967	1.50356	0.136537	-1.02062	0.311745
BAHCC1	0.323919	0.746697	0.285514	0.776454	0.866205	0.388431	0.113261	0.910126	3.12767	0.00243903	3.21822	0.00212945
BAHD1	1.73004	0.0868029	-0.377672	0.707305	3.7205	0.000327033	2.75184	0.00742694	1.39826	0.165806	1.21479	0.229454
BAI1	1.66746	0.0986492	3.09637	0.00323701	1.08894	0.27877	4.64501	1.4216e-05	3.25355	0.00165635	5.15316	3.3313e-06
BAI2	-4.29777	4.10524e-05	-4.92944	9.85017e-06	-1.12276	0.264201	-1.03106	0.305827	-6.63941	3.17962e-09	-6.57024	1.64927e-08
BAI3	-2.93526	0.00416086	-2.44519	0.0181185	-2.96648	0.00376017	-2.73693	0.00773929	-2.03039	0.0455579	-1.92595	0.0591039
BAIAP2	5.07717	1.85061e-06	2.19478	0.0329485	4.82368	4.99914e-06	2.90887	0.00477035	3.10359	0.00262348	1.65892	0.102625
BAIAP2L1	2.45525	0.0158589	2.72958	0.00878419	3.68096	0.000375084	3.12994	0.00249132	2.61809	0.0105285	0.627881	0.53259
BAIAP2L2	1.12042	0.2653	-0.517832	0.606906	1.62581	0.107106	1.6814	0.096846	1.73687	0.086166	1.28033	0.205616
BAIAP3	0.594712	0.553421	-0.977809	0.332972	0.850556	0.397028	0.626088	0.533158	-5.57339	3.10305e-07	-3.92528	0.000235873
BAK1	2.3401	0.0213277	2.07531	0.0432284	1.42572	0.157034	0.731656	0.466659	-0.397469	0.692055	-1.18321	0.241636
BAMBI	2.05562	0.0425063	2.60937	0.0119962	0.764421	0.446398	-1.35488	0.179522	2.88405	0.00501336	1.83555	0.0716425
BANF1	2.85254	0.00530112	2.82175	0.00688034	2.98444	0.00356325	2.14558	0.0351426	3.16535	0.00217448	1.75668	0.0843432
BANF2	0.609039	0.543922	-0.647761	0.520163	1.26403	0.20913	0.762343	0.448246	1.99883	0.04894	1.21157	0.230676
BANK1	2.41475	0.0176203	1.36602	0.178169	3.46545	0.000778492	2.52173	0.0137997	-2.06924	0.0416729	-2.35029	0.0222434
BANP	-1.16899	0.245271	-0.0793988	0.937039	-0.892374	0.374313	-0.570197	0.570248	-1.18444	0.239661	-0.853434	0.396991
BAP1	-1.44983	0.150331	0.585499	0.560899	-0.434571	0.664801	0.0738127	0.941356	0.949342	0.345236	1.48461	0.143157
BARD1	-0.593333	0.554339	1.81899	0.0750268	0.826202	0.410637	-1.28366	0.203212	2.66506	0.00926753	1.25812	0.213479
BARHL1	2.62059	0.0101902	1.24772	0.218063	2.08687	0.0394176	0.660792	0.51077	2.98025	0.00378923	1.90547	0.0617673
BARHL2	0.765208	0.446005	-0.786195	0.435539	1.75141	0.082911	0.294874	0.768905	1.12745	0.262839	0.155555	0.876934
BARX1	2.66832	0.00893573	0.884311	0.380847	3.25894	0.00152422	0.387105	0.699775	2.86901	0.00523469	0.988394	0.327137
BARX2	2.51285	0.0136248	0.723064	0.473078	2.58581	0.0111417	1.66015	0.10106	2.49568	0.0145765	2.30107	0.0250656
BASE	-0.314266	0.753994	-2.36192	0.0221986	1.16419	0.247088	-0.495513	0.621687	2.28549	0.0248658	0.255842	0.798994
BASP1	-1.939	0.0554074	-4.67468	2.33738e-05	0.92167	0.358897	-2.85404	0.00557778	-1.10804	0.271084	-3.86309	0.000288765
BAT1	-3.3607	0.00111308	-2.24561	0.0292729	-0.14684	0.883551	-2.54776	0.0128885	-2.6052	0.0109008	-4.31913	6.33142e-05
BAT2	-1.92545	0.0571017	-0.547281	0.58667	1.45156	0.149724	0.223606	0.823671	0.681801	0.497286	0.839103	0.404917
BAT2L1	0.673481	0.502243	-1.54883	0.127858	2.01406	0.0466627	-1.38229	0.170986	2.31116	0.0233349	-0.448847	0.655244
BAT2L2	-0.427526	0.669944	1.30963	0.196427	-1.06558	0.289153	0.227883	0.820357	-0.936581	0.351724	0.70582	0.483175
BAT3	-2.64528	0.00952252	-1.63892	0.107637	0.438208	0.662171	-0.939299	0.350593	-0.721235	0.472816	-0.643378	0.522559
BAT4	0.408187	0.684036	-1.53193	0.13197	2.35421	0.0204972	-1.72935	0.0878602	2.46202	0.0159114	-1.08094	0.284276
BAT5	-1.89189	0.0614881	-2.4398	0.0183604	-2.07601	0.0404331	-2.79148	0.0066516	-3.68618	0.000407526	-4.38446	5.06369e-05
BATF	2.46319	0.0155327	1.05192	0.297995	3.63422	0.000440532	2.40976	0.0184155	1.78344	0.0782154	-0.0174405	0.986146
BATF2	3.15744	0.00212149	0.501551	0.618229	2.9625	0.00380508	2.40027	0.0188639	2.03101	0.0454939	0.934206	0.354138
BATF3	0.857227	0.393433	0.414085	0.680619	-1.84272	0.0683034	-1.05967	0.292696	-1.85353	0.067403	-0.650356	0.518075
BAX	4.06115	9.9057e-05	2.25043	0.0289441	6.13824	1.6514e-08	3.42942	0.000986144	3.94148	0.000169573	2.43858	0.0178839
BAZ1A	2.42878	0.0169915	4.41442	5.56699e-05	4.91576	3.42858e-06	1.51927	0.132899	7.81379	1.63159e-11	8.1309	4.16762e-11
BAZ1B	-2.87805	0.0049221	-0.65417	0.516061	2.08904	0.0392176	1.69919	0.0934278	0.270826	0.787205	-0.267633	0.789948
BAZ2A	-4.64767	1.05811e-05	-1.2758	0.20804	-2.36578	0.019901	-0.388455	0.69878	-5.75366	1.45844e-07	-2.30062	0.0250929
BAZ2B	-6.56242	2.60346e-09	-3.42607	0.0012481	-9.06227	1.04066e-14	-6.19745	2.83971e-08	-9.16316	3.40882e-14	-6.87607	5.11733e-09
BBC3	2.01132	0.0470664	0.967387	0.338101	2.22354	0.0284068	1.36189	0.177311	2.01993	0.046656	1.31776	0.192857
BBOX1	1.04201	0.299996	-1.67981	0.0993592	1.34027	0.183164	0.42611	0.671248	1.06213	0.291295	-1.12546	0.265111
BBS1	-1.29061	0.199907	-1.20807	0.232819	1.2212	0.224851	1.13259	0.260995	-3.67346	0.00042532	-1.41007	0.163952
BBS10	-2.34979	0.0208104	-1.2274	0.225536	0.724874	0.470206	-0.936576	0.351983	-0.851638	0.396895	-1.68029	0.0983734
BBS12	1.95484	0.053481	1.47426	0.146808	2.32864	0.0218709	1.80399	0.0752477	0.775832	0.44008	-0.836129	0.406574
BBS2	-2.12489	0.0361375	-1.65843	0.103619	-3.10665	0.00245692	-2.13234	0.0362521	-4.46343	2.54873e-05	-3.51837	0.000860434
BBS4	0.40211	0.688487	-0.892302	0.376592	-0.16958	0.86568	-1.66964	0.0991602	-2.1856	0.0316971	-2.64575	0.010516
BBS5	-0.528756	0.598183	1.59499	0.117144	-2.79266	0.00625389	-1.94195	0.0558992	-1.18367	0.239963	-0.586297	0.559991
BBS7	-0.308787	0.758146	0.774455	0.442383	-0.81578	0.416546	-0.362622	0.717907	0.357083	0.721947	0.208168	0.83584
BBS9	-4.59634	1.29588e-05	-2.67477	0.0101355	-4.27189	4.39256e-05	-3.92658	0.00018975	-6.78257	1.6883e-09	-6.38802	3.30433e-08
BBX	1.4777	0.142726	0.326663	0.745314	0.0854449	0.932077	-2.24302	0.0278491	-0.652676	0.515791	-1.21601	0.228993
BCAM	1.66492	0.0991551	2.16887	0.0349744	-1.52734	0.129802	-0.566337	0.572856	-1.79384	0.0765255	-1.53457	0.130422
BCAN	0.858963	0.392479	-0.130627	0.896605	0.880117	0.380885	1.08239	0.282548	0.967743	0.336019	1.57593	0.120576
BCAP29	0.861983	0.390823	-0.138113	0.890717	0.0685492	0.945484	-1.97141	0.0523659	-2.96047	0.00401569	-3.25807	0.00189292
BCAP31	3.45039	0.00083033	3.33644	0.00162505	3.19234	0.00188168	3.19752	0.00203054	1.56497	0.121442	2.27384	0.0267601
BCAR1	2.96604	0.00379776	1.85639	0.0694158	2.46707	0.0153047	1.77448	0.080042	1.39736	0.166074	-0.37186	0.711376
BCAR3	2.22983	0.0280648	0.841801	0.403989	-2.11061	0.0372754	-1.93031	0.0573498	-4.26748	5.27161e-05	-4.152	0.000111395
BCAS1	0.590273	0.55638	-0.0468563	0.962818	0.0524193	0.958298	0.938472	0.351014	1.0741	0.285928	0.0131777	0.989532
BCAS3	-2.18951	0.0309576	-1.91355	0.0615287	0.295777	0.768008	0.712456	0.478393	-3.94337	0.000168458	-4.4063	4.69786e-05
BCAS4	2.67878	0.00868018	0.715283	0.477829	3.92492	0.000158578	4.05046	0.000123401	3.35648	0.00119836	1.40381	0.1658
BCAT1	-1.43195	0.155374	0.971398	0.336121	-3.6643	0.000397281	-4.08256	0.000110251	1.79113	0.0769619	3.78792	0.000367984
BCAT2	-0.642191	0.522264	-1.99487	0.0516347	1.59792	0.113186	-0.726134	0.470017	1.09865	0.275135	-0.20677	0.836927
BCCIP	0.148619	0.882163	0.209956	0.834573	3.07512	0.00270692	1.59204	0.115583	2.93286	0.00435273	1.29378	0.200961
BCDIN3D	-2.13129	0.0355925	-4.00485	0.000210213	1.25841	0.211143	0.507453	0.613326	-0.218751	0.827388	-2.86806	0.00578059
BCHE	0.976692	0.331151	2.20156	0.0324357	-2.10738	0.0375606	-2.43849	0.0171155	0.147399	0.883179	0.913657	0.364746
BCKDHB	-1.05192	0.295451	-0.986961	0.32851	0.25199	0.801561	-1.28101	0.204137	0.522754	0.602555	-0.781548	0.437714
BCKDK	0.0137761	0.989037	-0.336198	0.738157	0.235422	0.814358	-0.694137	0.489741	0.00904545	0.992805	0.136676	0.891769
BCL10	1.5768	0.118099	-0.47485	0.637004	1.33828	0.183809	-2.98652	0.00381025	-1.18782	0.238335	-3.12651	0.00278361
BCL11A	-1.68026	0.0961239	0.721769	0.473867	2.32808	0.0219015	1.10827	0.271287	2.51521	0.0138489	2.59772	0.0119216
BCL11B	0.161788	0.871809	-0.931176	0.356328	3.0489	0.00293256	0.4687	0.640644	1.16949	0.245596	-1.65016	0.104411
BCL2	-1.9079	0.0593622	-1.96904	0.0546176	-1.11047	0.269435	-1.8492	0.068369	-2.48459	0.0150048	-2.48818	0.0157871
BCL2A1	2.71307	0.00788853	2.74974	0.00833042	3.6092	0.000479865	1.9209	0.058545	-0.781269	0.436894	-0.955083	0.343569
BCL2L1	1.38396	0.169548	2.46794	0.0171282	0.123164	0.902222	0.462934	0.644752	-0.935153	0.352455	-1.3373	0.186436
BCL2L10	1.44995	0.150298	0.55153	0.583777	0.559354	0.577159	2.0841	0.0405565	2.19512	0.0309816	2.35798	0.021829
BCL2L11	-0.740726	0.460649	1.19066	0.239524	-5.01076	2.31403e-06	-5.89401	1.00576e-07	-2.6325	0.0101262	-0.830917	0.409488
BCL2L12	3.76899	0.000281554	2.2746	0.027344	3.21829	0.00173401	1.93534	0.0567183	1.88602	0.0628326	0.507746	0.613591
BCL2L13	-1.25298	0.213227	-1.56011	0.12517	-0.496437	0.620665	-1.86631	0.0659075	-1.64654	0.103481	-1.43304	0.15731
BCL2L14	1.40466	0.163317	-0.971702	0.335971	1.95499	0.0533482	1.13877	0.258423	1.65643	0.101456	-0.463268	0.644936
BCL2L2	3.23505	0.00166367	1.3679	0.177585	2.48	0.0147919	2.41327	0.0182521	-0.158901	0.874138	0.217636	0.82849
BCL3	3.02903	0.00314407	3.03345	0.00386041	1.73496	0.0857978	0.632364	0.529072	-0.0728911	0.94207	-0.598212	0.552068
BCL6	1.75786	0.0819262	1.00215	0.321197	-2.41278	0.0176347	-2.07892	0.0410447	-8.90936	1.09016e-13	-6.77185	7.62847e-09
BCL6B	1.8496	0.0674164	2.92577	0.00519443	0.519047	0.604863	-0.373993	0.709464	-0.915201	0.36277	-0.481913	0.631713
BCL7B	4.67066	9.65898e-06	1.89296	0.064277	4.31587	3.7152e-05	2.27765	0.0255979	1.14002	0.257598	-1.65768	0.102876
BCL7C	2.79829	0.00619762	-1.32392	0.191673	2.62167	0.0101026	-0.229638	0.818998	2.41163	0.0181148	-0.858163	0.394397
BCL9	-2.89731	0.00465257	-0.356532	0.722973	0.0690849	0.945059	0.11288	0.910428	1.83064	0.0707872	1.7797	0.0804562
BCL9L	-1.36313	0.175999	-1.34571	0.184591	-2.86592	0.00506002	-1.89974	0.0613116	-2.27541	0.0254905	-1.00779	0.317814
BCLAF1	-2.06122	0.0419579	-0.400826	0.690291	-1.28988	0.200038	-3.44779	0.000930086	0.199461	0.842396	0.166027	0.868723
BCMO1	1.24304	0.216848	-0.581381	0.563649	1.13232	0.260182	0.559739	0.577326	1.52087	0.132139	0.0744434	0.940918
BCO2	-0.820571	0.413903	-0.0495347	0.960695	-4.0893	8.70499e-05	-2.72937	0.00790237	-1.13794	0.258458	0.867969	0.389051
BCOR	-3.70405	0.000352746	-1.5286	0.132794	0.0639529	0.949134	-0.120252	0.904605	0.919223	0.360675	0.724601	0.471661
BCORL1	-1.80582	0.0740488	1.02775	0.309117	2.48106	0.0147505	4.71631	1.08636e-05	-1.06466	0.290153	0.56181	0.576448
BCR	0.82312	0.412459	0.644956	0.521964	1.62773	0.106698	0.18768	0.851634	1.38007	0.171317	-0.405701	0.686481
BCS1L	-2.97352	0.00371403	-0.844543	0.402471	-0.68423	0.495397	-2.18958	0.0316646	-0.29339	0.769965	0.512455	0.610313
BDH1	1.38325	0.169764	1.51666	0.135779	-0.340393	0.734268	0.396911	0.69256	3.9804	0.000147908	5.23072	2.51118e-06
BDH2	2.05371	0.0426947	2.39738	0.0203695	-2.28899	0.0241616	-3.5792	0.000608569	-1.77233	0.0800542	-1.57626	0.1205
BDKRB1	1.17854	0.241465	3.57834	0.000790923	2.33525	0.021508	3.78373	0.000308726	1.03648	0.303026	2.81548	0.00667676
BDKRB2	0.152347	0.87923	2.07251	0.0434998	-1.82622	0.0707718	-2.52988	0.0135083	-1.34903	0.18104	-1.01125	0.31617
BDNF	2.73516	0.00741412	1.15896	0.25209	3.30147	0.00133026	1.59618	0.114654	2.55981	0.0123083	1.886	0.0643942
BDP1	-0.622882	0.534824	-0.560677	0.577572	-0.449089	0.654329	-1.52741	0.130866	-0.164432	0.869796	-0.814682	0.418645
BECN1	0.824202	0.411847	0.371289	0.712023	2.20416	0.0297831	0.904685	0.368529	-2.28847	0.0246838	-2.02859	0.0471817
BEGAIN	1.47366	0.14381	2.33218	0.0238445	0.551551	0.582474	0.537548	0.59248	2.52644	0.0134454	3.52621	0.000839827
BEND2	0.740566	0.460745	-0.771918	0.44387	0.903925	0.368186	-0.0495074	0.960647	1.24802	0.215576	0.467467	0.641948
BEND4	4.36522	3.17632e-05	3.17824	0.00256679	4.55555	1.46505e-05	1.5381	0.128233	7.09496	4.19551e-10	6.64208	1.25336e-08
BEND5	-3.61624	0.000476548	-5.10951	5.30808e-06	1.69376	0.0933925	-1.00862	0.316398	-2.34291	0.0215573	-7.44416	5.78503e-10
BEND6	0.465249	0.642796	0.115907	0.9082	-4.7789	5.997e-06	-4.78016	8.52468e-06	-3.9398	0.000170574	-2.60409	0.0117259
BEND7	0.24976	0.803301	-0.170741	0.865131	2.83747	0.00549631	1.81033	0.0742507	0.0105385	0.991617	-0.854137	0.396605
BEST1	2.87881	0.00491121	4.0213	0.000199481	2.89957	0.00458511	2.71611	0.00819579	2.18315	0.0318833	1.94267	0.0570013
BEST2	1.0199	0.310315	0.134751	0.893361	1.95289	0.0536	1.07258	0.286897	1.34362	0.182776	0.15449	0.877769
BEST3	0.717997	0.474485	-2.42643	0.0189737	1.39585	0.165822	-0.896445	0.372884	1.93098	0.0569414	-0.336558	0.737686
BEST4	-2.95864	0.00388232	-3.00104	0.00422378	-4.10008	8.36498e-05	-2.41747	0.0180585	-4.73928	8.90336e-06	-2.33063	0.023335
BET1	2.09989	0.0383336	0.912972	0.365728	3.39864	0.00097044	1.87943	0.0640709	-0.0360292	0.971347	-1.32096	0.191795
BET1L	1.08007	0.282791	2.0403	0.0467283	1.34053	0.183081	2.20704	0.0303703	-0.0517436	0.958859	0.648107	0.519518
BEX1	2.08847	0.0393748	0.846043	0.401641	4.78446	5.86325e-06	1.58502	0.117169	5.10229	2.12912e-06	1.7423	0.0868497
BEX2	3.33069	0.00122637	1.56509	0.123998	2.84467	0.0053828	1.78013	0.0791057	3.79835	0.000278431	1.83426	0.0718363
BFAR	2.91242	0.00445073	1.46808	0.148473	4.89379	3.75265e-06	1.29459	0.199433	4.49943	2.22597e-05	2.74093	0.00816828
BFSP1	3.35865	0.0011205	2.73003	0.00877383	1.56531	0.120639	0.569544	0.570689	4.82084	6.48446e-06	1.02179	0.3112
BFSP2	1.75426	0.0825446	-1.21017	0.232021	2.10913	0.0374064	1.01014	0.315674	2.28183	0.0250909	0.465357	0.643449
BGN	2.61378	0.0103815	4.15329	0.000130622	-0.94676	0.346021	-2.08522	0.0404519	-3.18753	0.00203151	-1.78697	0.0792599
BHLHA15	1.38616	0.168875	0.177395	0.85993	2.7152	0.00779172	2.73046	0.00787867	2.51878	0.0137196	1.62457	0.109772
BHLHB9	-0.797223	0.427268	-1.39507	0.169285	2.26765	0.0254801	1.00511	0.318074	-0.167836	0.867126	-1.5548	0.125528
BHLHE22	1.84745	0.0677296	0.594267	0.555068	0.911046	0.36444	-0.275734	0.783511	0.406336	0.685554	-0.614002	0.541657
BHLHE40	3.44596	0.000842529	3.92992	0.000266559	-0.607709	0.544744	-2.34198	0.0218382	-3.37293	0.00113727	-1.6599	0.102428
BHLHE41	2.26974	0.0254372	1.71639	0.0924069	-3.90553	0.000170028	-3.79193	0.000300307	-4.29283	4.80345e-05	-2.46538	0.0167215
BHMT	2.03381	0.0447017	1.3646	0.178613	1.55872	0.12219	2.06006	0.0428624	2.56215	0.0122319	2.68265	0.00954108
BHMT2	4.11076	8.25618e-05	3.05073	0.00367887	1.75004	0.0831478	1.34783	0.181771	1.52905	0.130102	0.207644	0.836247
BICC1	3.12289	0.00236091	4.94884	9.21806e-06	-1.35038	0.179911	-2.68606	0.0088977	-1.84072	0.0692795	-2.43934	0.0178498
BICD1	-2.97617	0.00368475	-2.83676	0.00660933	-4.16859	6.48283e-05	-3.64791	0.000485706	-2.8313	0.00583007	-0.778097	0.43973
BICD2	-1.79975	0.0750084	0.369501	0.713347	0.0987095	0.921565	-1.19357	0.236406	-3.08668	0.00276071	-1.56985	0.121985
BID	1.56808	0.12012	0.839807	0.405095	2.80171	0.00609376	-0.281219	0.779317	7.3056	1.62896e-10	4.04747	0.00015781
BIK	-0.907733	0.366269	-0.562028	0.576659	-2.99307	0.00347217	-1.42217	0.159121	-1.28667	0.20183	-0.965885	0.338182
BIN1	-1.58964	0.115169	-0.938425	0.352629	-2.95519	0.00388897	-3.04507	0.00320836	-1.54375	0.126499	-0.125823	0.900315
BIN2	2.285	0.0244909	2.0573	0.0449998	2.44045	0.0164104	0.671767	0.503796	-4.79428	7.19195e-06	-5.38364	1.43336e-06
BIN3	0.93745	0.350856	0.929168	0.357357	1.0197	0.310307	0.713757	0.477593	-1.39328	0.1673	0.0779175	0.938167
BIRC2	-2.02523	0.0455919	-0.651782	0.517588	-4.97748	2.65694e-06	-4.7357	1.00941e-05	-4.04733	0.000116716	-3.91422	0.000244546
BIRC3	1.51674	0.132585	0.239139	0.811995	1.70174	0.0918803	0.672127	0.503568	-8.57375	5.07223e-13	-6.96989	3.57138e-09
BIRC5	1.34849	0.180641	0.672085	0.504686	11.6308	2.38342e-20	6.4205	1.10834e-08	9.74391	2.39688e-15	5.24755	2.36138e-06
BIRC6	-1.70204	0.0919516	1.13318	0.262653	-0.27812	0.781489	1.08442	0.28165	0.319795	0.749937	1.95944	0.0549577
BIRC7	0.151601	0.879816	-1.10738	0.273535	0.146474	0.88384	1.42821	0.157383	0.496028	0.621202	0.970156	0.336068
BIRC8	0.638386	0.524727	0.348023	0.729313	0.450325	0.653441	0.732286	0.466276	1.11253	0.269159	0.734148	0.465868
BIVM	-2.32792	0.0219942	-1.00667	0.31904	-1.91842	0.0578812	-2.01589	0.0473933	0.90791	0.366586	-0.476605	0.635466
BLCAP	1.76538	0.0806474	-1.02503	0.310382	1.92395	0.0571755	0.40392	0.687421	-2.93274	0.00435425	-2.99375	0.00407015
BLID	0.938885	0.350122	1.38291	0.172962	-0.734704	0.464222	-0.631376	0.529714	-0.0225488	0.982065	1.18765	0.239896
BLK	2.22156	0.0286384	1.45928	0.150869	3.48096	0.000739352	2.96726	0.00403012	-0.117548	0.906713	0.0833536	0.933862
BLM	0.669249	0.504926	0.862937	0.392376	9.23404	4.36337e-15	4.50396	2.40607e-05	10.2625	2.26672e-16	5.38316	1.43589e-06
BLMH	-1.55959	0.122114	-0.958401	0.342566	-0.955294	0.34171	-1.55131	0.125038	0.0247451	0.980318	-0.412888	0.681237
BLNK	3.58193	0.000535293	3.9416	0.000256901	2.96165	0.00381473	2.56484	0.0123208	-1.05588	0.294123	-2.04607	0.0453731
BLOC1S1	2.27602	0.0250442	0.446743	0.657029	1.84517	0.0679428	-0.404183	0.687228	1.28271	0.203208	-1.48858	0.142111
BLOC1S2	3.35888	0.00111969	-1.47274	0.147216	2.94786	0.00397474	-0.79563	0.428758	-0.432386	0.666596	-3.12443	0.00280044
BLOC1S3	-0.453774	0.651005	-1.83888	0.0719962	-1.98603	0.0497406	-0.359928	0.719912	-0.976466	0.331705	0.226559	0.821577
BLVRA	-0.682075	0.496817	-0.35708	0.722565	0.339572	0.734884	0.204761	0.838314	-1.32579	0.188591	-2.47578	0.0162891
BLVRB	3.58519	0.000529427	4.11419	0.000148166	1.19531	0.234764	0.166362	0.86832	-1.6841	0.0959647	-3.66522	0.000543832
BLZF1	1.16997	0.244879	1.24648	0.218514	1.33287	0.185573	-0.521827	0.603329	0.222068	0.824813	-0.460233	0.6471
BMF	-0.395591	0.693276	0.199448	0.842738	-2.37269	0.0195523	-2.92688	0.00452954	-2.91602	0.00457093	-3.8024	0.000351258
BMI1	0.417409	0.677301	-0.639929	0.5252	2.68574	0.00846164	-0.451746	0.652756	1.6494	0.102892	-1.3135	0.194278
BMP1	1.08658	0.279916	3.86406	0.000327911	-2.3327	0.0216474	-2.046	0.0442621	-2.00171	0.0486227	0.754367	0.453734
BMP10	0.614719	0.54018	-1.91201	0.0617308	1.41845	0.159137	-0.675325	0.501546	1.23207	0.221444	-1.12013	0.267356
BMP15	0.252307	0.801338	0.258912	0.796787	0.620292	0.536463	1.87613	0.0645289	1.14395	0.255973	1.69309	0.0958972
BMP2	3.31734	0.00128017	2.33963	0.0234218	3.52337	0.000641609	1.70633	0.0920847	0.899099	0.371232	0.00602686	0.995212
BMP2K	2.91292	0.00444425	3.13441	0.00290738	1.59181	0.114552	-1.31847	0.191359	-0.895137	0.373334	-2.26916	0.0270613
BMP3	1.59029	0.115023	0.582439	0.562942	0.931538	0.353797	-0.096635	0.923274	1.46278	0.14735	0.461217	0.646398
BMP4	2.18932	0.0309718	2.5427	0.0142094	0.314389	0.753874	-0.890721	0.375927	0.802272	0.424715	-0.0243174	0.980684
BMP5	-1.62307	0.107821	-0.21146	0.833405	-2.43546	0.0166252	-0.793198	0.430165	-1.77948	0.0788661	0.1658	0.868901
BMP6	2.74616	0.00718763	4.02824	0.000195118	1.20098	0.232567	0.715786	0.476346	-0.361328	0.718784	0.256183	0.798732
BMP7	3.82539	0.000231013	2.06952	0.0437917	5.57955	2.02899e-07	3.56892	0.000629318	2.94583	0.00419129	2.8855	0.00550892
BMP8A	-0.0567592	0.954854	-1.00018	0.322139	-1.80951	0.0733465	-2.84102	0.00578713	-2.7048	0.0083096	-3.04665	0.00350235
BMP8B	2.1758	0.0319995	-0.47005	0.640405	1.24048	0.217673	-0.0604904	0.951926	1.81292	0.0735037	0.849491	0.399162
BMPER	0.480735	0.631787	-0.314846	0.754216	-3.24879	0.00157427	-1.95819	0.0539273	-2.86653	0.00527215	-3.82689	0.000324612
BMPR1A	-0.254031	0.800009	-0.132562	0.895083	1.46237	0.146745	-0.0368157	0.97073	1.14933	0.253762	-0.288795	0.773786
BMPR1B	-2.5716	0.0116411	-4.11988	0.000145475	0.133082	0.894393	-2.40643	0.0185718	-2.95194	0.00411716	-3.35397	0.00142114
BMPR2	-2.71171	0.00791881	-0.548129	0.586092	-4.53791	1.57045e-05	-3.35299	0.00125546	-4.45428	2.63774e-05	-3.41691	0.00117457
BMS1	-2.06464	0.0416252	-0.189763	0.850279	-1.28505	0.201712	-0.228202	0.820111	1.16458	0.247567	1.93371	0.0581197
BMS1P1	-3.86651	0.000199751	1.47885	0.14558	-3.11434	0.00239932	0.96622	0.337039	-2.40424	0.0184601	2.14695	0.0360651
BMX	2.48716	0.014584	2.32096	0.0244931	2.62313	0.0100621	1.89791	0.0615568	1.70011	0.0929004	0.597324	0.552657
BNC1	3.81179	0.000242344	2.61195	0.0119171	4.09892	8.40088e-05	2.30758	0.0237828	3.89289	0.00020091	1.67936	0.0985551
BNC2	1.24262	0.217002	3.58835	0.000767306	-2.37694	0.0193408	-1.73315	0.0871796	1.15518	0.251372	3.32643	0.00154381
BNIP1	1.33371	0.185422	0.832037	0.409425	1.99957	0.0482323	-0.565489	0.573429	2.16702	0.0331349	0.12893	0.897867
BNIP2	2.78395	0.00645664	0.585276	0.561048	2.26978	0.0253458	-1.22716	0.223601	0.863281	0.390501	-2.18145	0.0332891
BNIP3	2.34791	0.02091	0.62971	0.53181	3.35488	0.00111937	0.801363	0.425453	1.69074	0.0946835	-0.697606	0.48826
BNIP3L	-0.0662141	0.947344	-0.639367	0.525562	-0.0770701	0.93872	-2.81604	0.00620915	-3.55452	0.000631641	-5.60856	6.23513e-07
BNIPL	1.93123	0.0563744	-0.524276	0.60245	2.78241	0.00644007	1.96266	0.0533948	4.24046	5.81917e-05	2.73532	0.008292
BOC	2.60195	0.0107218	3.35663	0.00153171	-0.274376	0.784356	-2.10528	0.0386151	-0.493083	0.623272	-0.310959	0.756966
BOD1	3.23835	0.00164645	1.19913	0.236246	5.79595	7.77677e-08	0.779586	0.438088	7.63405	3.69114e-11	4.01064	0.00017824
BOD1L	-1.08102	0.282367	0.628135	0.532832	-2.02216	0.0458043	-1.66229	0.100628	-0.438861	0.661917	-0.145321	0.88497
BOD1P	0.125801	0.90015	-0.697163	0.488996	1.13051	0.260939	1.3773	0.172516	1.94357	0.0553777	1.70363	0.0938973
BOK	-6.04869	2.73288e-08	-4.56681	3.35581e-05	-4.10222	8.29876e-05	-4.65961	1.34563e-05	-6.40821	8.77182e-09	-5.35613	1.58599e-06
BOLA1	1.84435	0.0681842	0.850906	0.398961	4.00413	0.000119008	1.94841	0.0551075	4.14966	8.09013e-05	2.65677	0.0102157
BOLL	0.53942	0.590833	-0.678013	0.500953	0.907517	0.366294	-0.462333	0.645181	1.68369	0.0960458	-0.43921	0.66217
BPESC1	1.31686	0.190987	0.767924	0.446217	2.23847	0.027385	1.46307	0.147626	1.80081	0.0754097	2.76249	0.00770818
BPGM	1.82937	0.0704161	0.0943175	0.925242	2.89685	0.00462184	0.111242	0.911722	-0.640736	0.523481	-2.10778	0.0394593
BPHL	-5.21299	1.04864e-06	-3.36549	0.00149239	-5.34681	5.58122e-07	-3.51448	0.000750846	-5.12277	1.96114e-06	-4.71189	1.61998e-05
BPI	1.61795	0.10892	-1.68754	0.0978565	1.06814	0.288006	0.143993	0.885892	0.192166	0.848088	-3.49824	0.000915591
BPIL1	1.07709	0.28411	-0.956914	0.343308	1.3036	0.195334	1.04501	0.299376	1.12107	0.265529	0.815787	0.418018
BPIL2	0.712193	0.478055	0.193706	0.847207	0.189717	0.849912	1.56941	0.120762	-0.12757	0.898802	-0.667038	0.507439
BPIL3	0.142633	0.886876	-0.479721	0.63356	0.589652	0.556741	1.61941	0.109558	0.8343	0.406536	1.07451	0.28712
BPNT1	-0.662892	0.508972	0.491135	0.625523	0.358985	0.720355	0.212388	0.832381	0.851652	0.396888	1.49303	0.140943
BPTF	-1.13582	0.258832	-1.09856	0.27733	4.49303	1.87287e-05	1.67913	0.0972883	0.8356	0.405808	0.210895	0.833721
BRAF	-2.60955	0.0105019	-3.71407	0.000522575	-0.111378	0.911538	-1.79443	0.0767742	-4.86991	5.35159e-06	-5.20323	2.77609e-06
BRAP	-1.19073	0.236667	-0.937958	0.352866	1.77102	0.0795737	0.024267	0.980704	-0.647661	0.519013	-2.05897	0.0440771
BRCA1	0.503173	0.615984	0.623608	0.535778	9.34138	2.53338e-15	4.89259	5.54223e-06	7.1804	2.86025e-10	4.0583	0.000152246
BRCA2	1.87792	0.0633958	0.951568	0.345986	9.33151	2.66335e-15	3.37605	0.00116768	9.27155	2.07543e-14	4.30071	6.74132e-05
BRCC3	1.85591	0.0665019	1.20729	0.233118	4.03765	0.00010528	3.12331	0.0025415	2.4554	0.0161867	2.03992	0.0460019
BRD1	-4.87472	4.2532e-06	-1.44982	0.15348	-2.22513	0.0282967	-1.44693	0.152083	-1.58412	0.117015	-0.554768	0.581224
BRD2	-0.519327	0.604715	-0.890755	0.377414	0.596326	0.552292	-2.72606	0.00797463	0.530644	0.5971	-1.30852	0.195948
BRD3	-4.20751	5.76509e-05	-1.07773	0.286432	-0.784093	0.434821	-1.03547	0.303777	0.933649	0.353226	0.720294	0.474288
BRD4	2.17673	0.0319279	1.31622	0.194225	2.63652	0.00969858	0.350389	0.727029	2.22743	0.0286585	0.667739	0.506995
BRD7P3	-0.843784	0.400866	-0.461084	0.646779	0.184297	0.85415	-0.871768	0.386117	-0.697986	0.48716	-0.9614	0.340412
BRD8	-3.65903	0.000411817	-1.29157	0.202565	-1.44903	0.150427	-0.179881	0.857731	-1.90764	0.0599389	-0.314863	0.754015
BRD9	-0.432173	0.666575	1.16693	0.248887	0.228485	0.819731	-1.15147	0.253196	3.58996	0.000561889	4.14564	0.000113795
BRDT	1.29909	0.196993	-1.46584	0.149081	2.23377	0.0277036	-0.896123	0.373054	1.44363	0.152652	-1.67464	0.0994838
BRE	1.60409	0.111946	0.649885	0.518802	0.193821	0.846705	-0.0392066	0.96883	-0.211461	0.833052	-0.104507	0.917134
BRF1	-3.617	0.00047532	-1.41319	0.163921	-0.203125	0.839446	-0.5717	0.569235	-1.38052	0.171178	-0.785931	0.435163
BRF2	2.21324	0.0292251	-0.234774	0.815363	2.47609	0.0149453	0.47202	0.638283	1.75325	0.0832968	0.822963	0.413959
BRI3	2.85616	0.00524578	2.07336	0.043418	2.11988	0.0364664	1.51807	0.133202	1.09277	0.277694	-0.274038	0.785046
BRI3BP	1.77815	0.0785123	1.82016	0.0748448	4.29496	4.02363e-05	4.77724	8.61991e-06	4.7772	7.68586e-06	5.46448	1.06381e-06
BRIP1	-0.0194613	0.984513	1.16901	0.248055	10.117	4.95807e-17	6.71052	3.22254e-09	9.31622	1.69174e-14	6.12844	8.85336e-08
BRIX1	1.68486	0.0952296	2.0934	0.0415114	2.76313	0.00680423	-0.44247	0.659422	3.70748	0.000379291	1.91153	0.0609685
BRMS1	3.18513	0.00194616	1.691	0.0971888	4.92549	3.29385e-06	3.22955	0.00184115	2.63083	0.0101721	1.05732	0.294827
BRMS1L	1.89744	0.0607442	-0.0649833	0.948452	4.45539	2.16921e-05	0.2904	0.772312	3.40061	0.00104108	-0.193362	0.847363
BRP44	1.27695	0.204668	-0.261678	0.794667	0.79732	0.427136	-1.42859	0.157273	-0.780161	0.437542	-3.84294	0.000308222
BRP44L	1.8124	0.073018	0.98789	0.32806	1.38498	0.169109	-0.832151	0.407966	1.78509	0.0779446	-0.699161	0.487294
BRPF1	-0.198173	0.843324	1.00686	0.318947	1.21869	0.2258	0.22621	0.821654	2.46826	0.015656	1.94322	0.0569341
BRS3	-0.621252	0.535891	-1.1678	0.24854	0.324706	0.746075	-0.252817	0.801101	0.496346	0.620978	-0.611656	0.543197
BRSK1	-3.07341	0.0027478	-3.06237	0.00356104	-3.41379	0.000923361	-3.87114	0.000229484	-0.703727	0.483597	-0.89616	0.373937
BRSK2	-3.29513	0.00137458	-3.8539	0.000338514	-1.15382	0.251298	-2.30863	0.0237211	-2.65887	0.0094256	-3.1194	0.00284154
BRWD1	-1.229	0.222045	-1.12192	0.267366	0.411804	0.681356	-0.856866	0.394249	1.0132	0.313947	0.0692689	0.945018
BRWD3	-0.536061	0.593143	1.08995	0.281066	1.45297	0.149333	1.45079	0.151009	1.40306	0.164376	0.536228	0.593887
BSCL2	0.179495	0.857923	-1.36937	0.177128	1.40062	0.164394	-0.70284	0.484331	-4.42218	2.97439e-05	-3.19251	0.00229656
BSDC1	-1.88924	0.0618461	-3.99207	0.000218932	-1.9089	0.0591131	-3.67566	0.000443098	-5.67331	2.04429e-07	-8.30121	2.17669e-11
BSG	0.631607	0.529129	1.30577	0.19773	1.75806	0.0817661	0.493639	0.623004	2.18579	0.0316825	2.6163	0.0113589
BSN	-3.96492	0.000140492	-2.56174	0.013542	-4.27808	4.29047e-05	-1.90469	0.060655	-4.06004	0.000111553	-0.91325	0.364958
BSND	1.00134	0.319155	0.580738	0.564079	1.49068	0.139162	0.573198	0.568225	1.91358	0.0591629	0.0526362	0.958206
BSPRY	-0.694705	0.488901	-1.86789	0.0677638	-1.43075	0.155587	-0.0497359	0.960465	-3.59896	0.000545383	-2.27136	0.0269192
BST1	1.76854	0.080115	2.91718	0.00531749	-1.68654	0.0947789	-4.35613	4.14025e-05	-6.81784	1.44376e-09	-6.10538	9.66058e-08
BST2	2.67191	0.00884732	4.51186	4.03038e-05	0.519641	0.604451	-0.221908	0.824989	-3.16529	0.0021749	-2.86272	0.00586634
BTAF1	0.526941	0.599437	0.769419	0.445338	1.17199	0.24396	-0.156637	0.875952	1.24233	0.217656	0.708637	0.481438
BTBD1	3.00604	0.0033695	0.416047	0.679192	3.19277	0.00187916	0.344159	0.731689	1.15704	0.250617	-1.58945	0.117491
BTBD10	-1.77761	0.0786021	-3.75859	0.00045546	1.56215	0.121382	-1.28659	0.202194	-2.5588	0.0123413	-5.48017	1.00384e-06
BTBD11	3.55798	0.0005803	2.4471	0.0180335	2.38213	0.0190846	1.01223	0.314682	5.9152	7.358e-08	3.94726	0.00021952
BTBD16	0.426645	0.670583	-2.17421	0.0345478	1.19086	0.236498	0.273016	0.785591	1.93124	0.056908	0.581844	0.562966
BTBD2	1.16458	0.247044	0.478673	0.6343	2.65736	0.00915616	0.16158	0.872071	3.7198	0.00036382	2.79058	0.00714449
BTBD3	-3.57307	0.000551546	-3.70115	0.000543771	-2.56033	0.0119375	-4.1202	9.65476e-05	-5.65834	2.17658e-07	-6.74358	8.50056e-09
BTBD6	0.793516	0.429414	-1.48826	0.14309	2.56296	0.0118528	-0.974748	0.332819	0.187196	0.851969	-2.10359	0.0398385
BTBD7	-0.26685	0.790151	0.126548	0.899816	3.1522	0.00213347	-0.180338	0.857374	2.47986	0.0151908	0.405538	0.6866
BTBD8	-2.52266	0.0132738	-1.76855	0.083193	-2.54254	0.012523	-0.212158	0.832559	-4.62231	1.39623e-05	-3.19653	0.00226962
BTBD9	-4.74302	7.23719e-06	-3.44291	0.00118726	-5.46419	3.3591e-07	-5.66548	2.57243e-07	-7.38836	1.12172e-10	-6.20964	6.5087e-08
BTC	1.90895	0.0592241	1.97187	0.0542839	0.894164	0.37336	0.350185	0.727182	0.679634	0.49865	0.824888	0.412874
BTD	-0.0589697	0.953098	1.20185	0.235197	-2.33125	0.0217271	-1.85999	0.0668074	-0.824053	0.4123	0.151122	0.880413
BTF3	1.66367	0.099406	4.88691	1.13889e-05	4.6118	1.17261e-05	0.939914	0.350279	9.88827	1.2414e-15	8.65427	5.69303e-12
BTF3L4	-2.38575	0.0189862	-3.09119	0.00328455	0.551881	0.582249	-0.696714	0.488136	-1.23657	0.219777	-1.36547	0.177471
BTF3P11	1.37548	0.172151	-2.17104	0.0348001	1.04575	0.298173	1.11504	0.268394	1.38629	0.169417	1.25803	0.213509
BTF3P9	-0.548209	0.584808	0.183686	0.855018	0.142855	0.886689	0.632413	0.52904	1.11254	0.269157	2.8069	0.00683461
BTG1	1.61946	0.108596	1.67109	0.10108	-0.473252	0.637054	-1.21243	0.229152	0.613982	0.540927	1.60523	0.11397
BTG2	2.75527	0.00700485	2.40716	0.0198898	0.94909	0.34484	0.570219	0.570234	-3.53256	0.000678874	-2.06027	0.0439483
BTG3	-0.321402	0.748597	1.41846	0.162386	-1.60907	0.110723	-2.22827	0.0288595	2.94306	0.00422523	3.38458	0.00129564
BTG4	-0.107298	0.914774	-1.83827	0.0720877	0.730743	0.466628	-1.18543	0.239589	1.2661	0.209063	-0.306347	0.760457
BTK	3.22623	0.00171065	2.8808	0.0058697	3.39794	0.000972677	1.21821	0.226963	-3.75653	0.000321181	-4.98984	6.0146e-06
BTLA	1.67115	0.0979158	0.126151	0.900129	2.52082	0.0132729	2.27662	0.0256623	-3.09795	0.00266854	-3.31579	0.00159381
BTN1A1	0.790078	0.43141	0.65243	0.517173	0.771376	0.442285	1.89765	0.0615914	1.65147	0.102467	2.01507	0.0486228
BTN2A1	0.132546	0.894827	-0.3545	0.724485	-2.50408	0.0138782	-1.89871	0.0614487	-2.75165	0.00729663	-1.67779	0.0988637
BTN2A2	3.65153	0.000422524	4.11103	0.000149679	1.72347	0.0878636	1.49665	0.13868	0.148123	0.88261	0.0669506	0.946855
BTN2A3	3.47962	0.000753866	2.21915	0.0311382	-0.137055	0.89126	-1.17587	0.243366	-0.262028	0.793957	-1.00608	0.31863
BTN3A1	5.91935	4.88115e-08	3.89157	0.000300786	1.53444	0.128047	1.02047	0.310788	-0.973031	0.333399	-0.0540286	0.957101
BTN3A2	4.25485	4.82712e-05	2.07255	0.0434961	0.960801	0.338947	0.569685	0.570594	-3.83779	0.000243134	-2.34104	0.0227511
BTN3A3	4.60627	1.24614e-05	2.94963	0.00486623	0.740877	0.460487	0.826719	0.411019	-4.29936	4.68953e-05	-2.81321	0.00671819
BTNL2	0.506078	0.61395	-0.0858192	0.93196	0.641059	0.522936	1.33692	0.18529	1.46538	0.146641	0.465464	0.643373
BTNL3	1.84068	0.068725	-1.56766	0.123397	2.47303	0.0150666	0.514587	0.608355	3.45157	0.000883658	1.11297	0.270392
BTNL8	1.80431	0.0742869	-0.660534	0.512004	2.11346	0.037025	-0.0872441	0.93071	1.97014	0.0521973	0.197414	0.844206
BTNL9	0.413797	0.679936	1.77877	0.0814822	-1.52787	0.129671	1.22689	0.2237	-2.52866	0.013367	1.08603	0.282039
BTRC	-1.27717	0.204593	-2.04106	0.0466497	-1.31753	0.190643	-0.281255	0.779289	-3.20791	0.00190798	-2.38147	0.020606
BUB1	-0.039684	0.968427	0.900045	0.372499	7.24	9.0292e-11	3.89025	0.000214965	7.56901	4.95649e-11	4.57203	2.64617e-05
BUB1B	0.000424108	0.999662	0.714744	0.478159	8.19675	8.0833e-13	4.49398	2.49655e-05	9.01882	6.60234e-14	6.19368	6.9148e-08
BUB3	1.94539	0.0546227	1.86755	0.0678122	4.50335	1.79867e-05	1.46226	0.147847	6.18722	2.29104e-08	2.81087	0.00676115
BUD13	-3.00022	0.00342891	-3.13851	0.00287385	-2.98788	0.00352669	-3.41423	0.00103488	1.52937	0.130021	1.12909	0.263591
BUD31	0.700987	0.484989	1.17696	0.244899	1.61445	0.10955	1.03646	0.303318	0.83635	0.405389	0.20185	0.840753
BVES	-1.6659	0.0989589	1.14429	0.258064	-2.21048	0.0293282	-0.685485	0.495152	0.560442	0.576706	3.61263	0.000641678
BYSL	0.63715	0.525528	2.71018	0.00924232	0.633086	0.528108	2.9709	0.00398765	4.29451	4.77387e-05	4.52198	3.14986e-05
BZRAP1	-1.04352	0.299301	-1.44467	0.154916	1.22032	0.225184	1.51811	0.13319	-1.17759	0.242367	-1.04382	0.300974
BZW1	2.48499	0.0146677	2.25144	0.0288754	2.74561	0.00715102	0.714995	0.476832	1.66941	0.0988498	0.562117	0.57624
BZW2	0.802635	0.424148	2.17704	0.0343239	3.02497	0.00315356	1.24467	0.217129	8.33649	1.50248e-12	7.56075	3.69811e-10
C10orf10	2.39191	0.0186885	3.04747	0.00371241	-1.04341	0.299247	-1.96733	0.052844	-5.26073	1.12316e-06	-2.70199	0.00906352
C10orf107	0.569559	0.570294	-0.0149413	0.98814	2.38016	0.0191815	0.0840864	0.933212	-0.980993	0.329482	-2.74914	0.00799002
C10orf11	2.24762	0.0268654	2.24815	0.0290992	-1.59986	0.112754	-1.1958	0.235543	-3.14408	0.00232031	-3.14158	0.00266454
C10orf110	2.14783	0.0342187	-0.465332	0.643755	3.47829	0.000745967	1.13452	0.260191	2.28836	0.0246905	1.85291	0.0690741
C10orf111	-2.39058	0.0187527	-1.61965	0.111726	-2.26966	0.0253534	-0.720745	0.473307	-3.11899	0.0025041	-0.933624	0.354436
C10orf116	3.80885	0.00024486	2.81336	0.00703647	1.31492	0.191515	0.107037	0.915045	-1.36827	0.174964	-1.26253	0.2119
C10orf118	0.51203	0.609794	-1.85704	0.0693218	-0.82868	0.409239	-2.78945	0.00668937	-3.66382	0.00043931	-5.89776	2.11384e-07
C10orf119	0.993293	0.323039	0.84497	0.402235	4.83746	4.72593e-06	2.20987	0.0301656	4.72056	9.5717e-06	2.28744	0.0259013
C10orf12	1.12084	0.265123	-0.0981067	0.922248	3.36495	0.00108331	1.8735	0.0648948	1.80989	0.0739759	1.23702	0.221152
C10orf125	1.00637	0.316741	1.98858	0.0523477	0.863969	0.389652	1.21101	0.229692	0.433657	0.665676	0.256596	0.798414
C10orf126	0.686226	0.494208	-0.705956	0.483559	1.58302	0.116543	1.24361	0.217517	1.27072	0.207422	1.09719	0.277172
C10orf129	1.14037	0.256938	-0.667814	0.507386	2.10642	0.0376458	0.774072	0.441322	3.00283	0.00354507	0.553342	0.582193
C10orf137	-0.548335	0.584721	-0.597616	0.552848	2.09241	0.0389082	0.443759	0.658494	1.97483	0.0516526	0.676941	0.501182
C10orf140	-5.62078	1.82403e-07	-3.08928	0.00330227	-0.637805	0.525044	-1.22943	0.222753	1.16175	0.248706	-0.333481	0.739995
C10orf18	2.30981	0.023019	2.18811	0.0334596	2.85365	0.00524413	1.01324	0.314201	4.4915	2.29351e-05	3.21447	0.00215305
C10orf2	1.14512	0.254978	2.18475	0.03372	4.00771	0.000117463	2.55827	0.0125365	6.56559	4.40108e-09	6.67929	1.08711e-08
C10orf25	-2.17306	0.0322109	-1.42353	0.160919	-0.692057	0.49049	-1.14989	0.253844	-0.0908059	0.927868	-1.72914	0.0891973
C10orf26	2.47356	0.0151156	1.35967	0.180158	1.34197	0.182614	-2.15217	0.0346016	-3.43255	0.000939585	-4.96746	6.51876e-06
C10orf27	0.0103872	0.991734	-0.215429	0.830327	0.611531	0.542222	-0.859718	0.392684	0.72827	0.468523	0.898554	0.37267
C10orf28	0.636302	0.526078	-0.281176	0.77976	1.37049	0.173573	0.908355	0.3666	-0.0481155	0.961741	-0.906864	0.368297
C10orf32	1.69123	0.0940043	-0.464145	0.6446	0.671741	0.503282	-1.33703	0.185256	-0.470221	0.639445	-1.20901	0.231649
C10orf35	0.063524	0.94948	-1.92993	0.0594147	2.22628	0.0282169	1.04086	0.301283	-0.297173	0.767086	-0.318882	0.750982
C10orf46	3.57873	0.000541119	-1.04652	0.300457	2.40111	0.0181748	-0.523638	0.602074	1.57812	0.118388	-1.72035	0.0907934
C10orf47	1.56755	0.120242	0.357381	0.722342	1.13509	0.259026	0.390865	0.697005	0.83586	0.405663	-0.0971592	0.922941
C10orf53	0.244653	0.807242	-0.544493	0.588572	1.06464	0.289579	1.64002	0.105189	1.33288	0.186262	0.871186	0.387307
C10orf54	1.91378	0.0585968	2.37204	0.021662	0.311366	0.756164	0.343184	0.73242	-5.57938	3.0267e-07	-2.59353	0.012052
C10orf55	1.6588	0.100386	-0.129256	0.897684	1.38649	0.168649	-0.24827	0.804604	2.95492	0.00408143	-0.900812	0.371479
C10orf57	1.94891	0.0541957	2.15279	0.0362855	2.3612	0.0201351	1.70795	0.0917819	2.36675	0.0203025	1.3383	0.186114
C10orf58	3.58497	0.000529827	1.47978	0.145333	3.787	0.000259132	1.92059	0.0585847	5.12476	1.94554e-06	3.61964	0.000627709
C10orf62	1.14438	0.255283	-1.17316	0.246402	1.51802	0.132134	1.11232	0.269555	1.24381	0.217115	2.61996	0.0112507
C10orf67	1.12979	0.261353	-0.278108	0.7821	2.30547	0.0231849	1.16993	0.245734	1.72274	0.0887052	-0.214104	0.83123
C10orf68	0.501205	0.617363	-2.36881	0.0218317	-1.19002	0.236827	-3.2081	0.00196607	-5.95175	6.29682e-08	-7.3782	7.45179e-10
C10orf71	1.22184	0.224729	-0.873678	0.386555	1.10326	0.272534	1.66737	0.0996124	2.84166	0.00566058	0.817199	0.417217
C10orf72	1.59883	0.11311	0.775885	0.441546	-1.67017	0.097983	-1.65032	0.10306	-5.85793	9.38522e-08	-3.92537	0.000235804
C10orf76	-3.24538	0.00161025	-2.26534	0.0279472	-3.03487	0.00306026	-1.49953	0.137934	-4.23347	5.96949e-05	-3.72172	0.000454684
C10orf78	1.7492	0.0834196	1.32449	0.191484	4.20044	5.75315e-05	1.41601	0.160913	2.79301	0.00649757	1.81255	0.0751686
C10orf79	2.72656	0.00759559	-0.784027	0.436798	4.25008	4.77103e-05	2.87003	0.00533017	-0.696235	0.488251	-1.27691	0.206811
C10orf81	2.4428	0.0163829	0.0190192	0.984903	1.73872	0.085132	1.00606	0.317624	1.44409	0.152524	0.130992	0.896243
C10orf82	-0.683756	0.495759	0.429824	0.669208	0.827154	0.4101	3.10441	0.00268952	0.435399	0.664417	2.32781	0.0234953
C10orf84	1.95032	0.0540248	-0.690287	0.493271	1.69751	0.09268	-0.674697	0.501943	0.980773	0.329589	-1.68374	0.097702
C10orf88	0.401752	0.68875	-1.14898	0.256141	1.93069	0.056325	0.264303	0.792272	0.762907	0.447708	-1.278	0.206428
C10orf90	1.91481	0.0584626	-1.02055	0.312482	2.49786	0.0141094	-0.243019	0.808654	1.49537	0.138658	-0.420636	0.675602
C10orf91	2.95037	0.00397877	-1.51012	0.137436	3.16504	0.00204969	1.16324	0.248422	2.94745	0.00417144	1.52051	0.133912
C10orf92	1.67041	0.0980614	-0.917316	0.36347	2.74207	0.00722316	3.72066	0.000381484	0.770375	0.443292	0.60086	0.550315
C10orf93	1.60457	0.111839	-0.126447	0.899896	3.6099	0.000478734	5.30819	1.08727e-06	-2.02702	0.0459097	-1.72826	0.0893564
C10orf95	0.795635	0.428187	0.0545527	0.956717	1.08624	0.279957	0.546534	0.586321	0.845369	0.400365	0.0791298	0.937207
C10orf96	0.771346	0.442377	-1.34131	0.186003	0.399174	0.690607	-0.636868	0.52615	0.906017	0.367581	-1.12977	0.263305
C10orf99	0.818005	0.415359	-0.428242	0.670351	2.18902	0.0308988	0.466474	0.642228	1.05514	0.294462	0.447147	0.656463
C11orf1	-1.66592	0.0989565	-0.789476	0.433637	-2.16017	0.0331253	-1.9265	0.0578309	2.8126	0.00614772	2.41896	0.01878
C11orf10	2.9938	0.00349558	2.65136	0.0107686	4.11805	7.82577e-05	0.943559	0.348425	4.81282	6.69061e-06	4.73047	1.51712e-05
C11orf16	2.21056	0.0294164	-1.26894	0.210456	3.20886	0.00178635	1.2029	0.2328	2.93597	0.0043135	1.30455	0.19729
C11orf17	0.764031	0.446703	-0.216451	0.829535	2.04261	0.0436965	1.56097	0.122741	-1.09782	0.275494	-1.81625	0.0745922
C11orf2	0.375753	0.707921	-0.509895	0.612414	2.3912	0.018645	-1.92948	0.0574539	2.52201	0.0136034	1.40144	0.166505
C11orf21	1.78778	0.0769339	-0.176696	0.860475	1.15817	0.249525	2.5969	0.0113152	0.205722	0.837518	-0.128815	0.897957
C11orf24	3.7231	0.000330263	2.97957	0.00448176	3.52917	0.000629218	1.975	0.0519488	2.38044	0.0196115	1.61049	0.112815
C11orf30	-3.17277	0.00202268	-0.980421	0.331694	-0.97802	0.330401	-1.5735	0.119812	1.11982	0.266059	2.30747	0.0246813
C11orf31	1.71944	0.088724	2.0266	0.0481635	3.95399	0.000142784	2.89662	0.00494076	3.27393	0.0015543	3.33635	0.00149851
C11orf35	1.7463	0.0839239	-0.69659	0.489351	1.54503	0.125466	1.65055	0.103012	1.80568	0.0746384	0.243761	0.808291
C11orf36	1.96858	0.0518555	-0.657387	0.514008	2.44938	0.0160318	1.64379	0.104405	3.29877	0.00143794	1.83584	0.0715995
C11orf39	0.45815	0.647869	-0.497284	0.621213	-0.236351	0.813639	0.509286	0.612047	0.429096	0.668979	1.37974	0.173056
C11orf40	-1.30653	0.194462	-1.16217	0.250795	-1.51022	0.134109	1.63439	0.106368	-0.378712	0.70588	0.968069	0.3371
C11orf41	-4.32747	3.66777e-05	-4.71583	2.03474e-05	-1.19468	0.23501	-2.70731	0.00839592	-3.26166	0.00161499	-3.28873	0.00172798
C11orf42	0.375907	0.707807	-0.340567	0.734885	1.6211	0.108115	2.28231	0.0253071	1.24257	0.217569	2.07487	0.0425243
C11orf44	0.034696	0.972393	-0.279233	0.781242	1.19846	0.233541	-1.86374	0.066273	1.35079	0.180477	-0.859841	0.393479
C11orf45	1.13294	0.260032	0.339426	0.735739	0.240312	0.810576	0.322312	0.748113	-0.506674	0.613743	0.9786	0.331913
C11orf48	2.16962	0.0324788	0.678864	0.500418	3.52181	0.000644975	2.5216	0.0138044	2.29504	0.024286	1.42709	0.15901
C11orf49	1.44556	0.151524	-0.605958	0.547339	4.26187	4.5627e-05	1.83193	0.0709318	0.652209	0.51609	-0.668171	0.506721
C11orf51	0.0934489	0.92574	0.603727	0.54881	0.174508	0.861815	-0.392274	0.695968	3.93742	0.000172001	2.03569	0.0464398
C11orf52	-0.286107	0.775406	0.316055	0.753304	-1.64674	0.10272	0.528136	0.598964	-0.512656	0.60957	-0.769299	0.444892
C11orf53	3.39841	0.000984645	0.273136	0.785897	3.58437	0.00052219	1.19793	0.234717	3.02113	0.00335813	1.44991	0.152565
C11orf54	-3.5458	0.000604551	-1.63311	0.108855	-5.52764	2.54728e-07	-4.75465	9.39333e-06	-0.678627	0.499285	-1.35645	0.180306
C11orf57	-1.90262	0.0600561	-1.50107	0.139754	-1.45772	0.148021	-3.73923	0.000358524	3.80307	0.000273959	1.98136	0.0523817
C11orf58	-0.196435	0.84468	0.664176	0.509691	2.63778	0.00966484	1.71694	0.0901182	0.563065	0.574927	-0.590063	0.55748
C11orf59	1.75281	0.0827942	0.393226	0.695858	0.211735	0.83274	-1.25821	0.212217	-0.0519923	0.958661	-0.327278	0.744656
C11orf61	-3.42358	0.000906825	-0.0828249	0.934328	-4.14954	6.96073e-05	-3.40691	0.0010592	2.45762	0.0160937	3.02752	0.00369854
C11orf63	-4.82638	5.17431e-06	-5.05649	6.37157e-06	-5.67531	1.33008e-07	-5.18175	1.79503e-06	-9.45075	9.14324e-15	-7.89301	1.03489e-10
C11orf64	-0.467262	0.64136	-0.258701	0.79695	-0.488989	0.625909	-0.336269	0.737607	0.10068	0.92005	0.563143	0.575546
C11orf65	-1.99124	0.0492671	-1.79244	0.0792372	-2.44503	0.0162151	-1.68216	0.0966967	0.523369	0.602129	0.91046	0.366414
C11orf66	1.85693	0.0663552	-1.12156	0.267517	3.41057	0.000933173	0.944689	0.347851	0.699816	0.486023	-0.969772	0.336257
C11orf68	1.11319	0.268376	-0.310728	0.757325	1.84747	0.067606	0.309639	0.757694	0.745217	0.458271	0.399814	0.690788
C11orf70	1.37803	0.171363	2.67518	0.0101246	2.24685	0.0268257	1.87256	0.0650274	0.917078	0.361791	0.305055	0.761436
C11orf71	0.445849	0.6567	-0.730853	0.468349	0.652768	0.515389	-1.96979	0.0525548	2.19442	0.0310343	0.393998	0.695053
C11orf72	1.04377	0.299188	-1.78938	0.0797351	1.1647	0.246884	0.238634	0.81204	1.78943	0.0772369	-1.41131	0.163589
C11orf73	-1.41841	0.159275	-1.36712	0.177826	-1.88995	0.0616317	-3.62293	0.000527355	1.5097	0.134965	0.345349	0.731103
C11orf74	1.57128	0.119375	0.670992	0.505377	2.31329	0.0227337	-0.435506	0.664446	2.87643	0.00512438	1.99057	0.0513311
C11orf75	0.759672	0.449293	2.83285	0.00667897	-1.54415	0.125679	-0.146402	0.883997	-1.19548	0.235346	-2.2369	0.0292204
C11orf76	-0.251645	0.801848	-1.75254	0.0859361	-0.269638	0.787989	0.684508	0.495764	-0.0438951	0.965095	0.988887	0.326898
C11orf80	-3.73048	0.000321925	-4.1484	0.000132701	-3.17597	0.00198082	-0.726625	0.469717	-7.4791	7.4452e-11	-5.50176	9.2677e-07
C11orf82	0.717349	0.474883	1.04844	0.299582	4.89946	3.66621e-06	3.22743	0.0018532	7.23183	2.27023e-10	5.89014	2.17529e-07
C11orf83	3.10221	0.00251606	-0.754239	0.454315	4.07626	9.13431e-05	1.19509	0.235818	3.46579	0.000843934	2.71153	0.00883628
C11orf84	3.47312	0.000770272	-0.673836	0.503582	5.74271	9.86129e-08	3.7938	0.000298412	4.03595	0.000121532	1.09301	0.278986
C11orf87	-1.08899	0.278857	-2.46437	0.0172803	-2.17561	0.0319167	-2.67515	0.00916593	-1.63965	0.10491	-2.49721	0.0154299
C11orf88	0.659797	0.510947	-0.955582	0.343974	0.834503	0.405967	-0.189523	0.850195	1.59927	0.113607	0.758679	0.45117
C11orf9	-1.74344	0.0844248	-1.11822	0.268927	2.42726	0.0169842	3.20935	0.00195856	1.01459	0.313286	0.753182	0.454441
C11orf92	2.18096	0.0316038	0.569259	0.571781	3.41991	0.00090497	0.882808	0.380161	2.43898	0.0168874	0.105996	0.915958
C12orf10	1.09251	0.277313	1.03327	0.306549	2.44077	0.0163967	0.330883	0.741655	3.84919	0.000233753	2.62073	0.0112281
C12orf11	-0.495313	0.6215	1.17874	0.244195	0.114301	0.909226	-1.25113	0.214775	2.32142	0.0227469	2.53583	0.0139842
C12orf12	1.51378	0.133332	-1.93682	0.0585446	1.96504	0.0521559	-1.0337	0.304597	2.03785	0.0447891	-0.871368	0.387209
C12orf23	0.594519	0.553549	0.811034	0.421268	0.329538	0.742431	-0.765522	0.446363	-1.82613	0.0714699	-2.84468	0.00616433
C12orf24	-1.78751	0.0769778	-0.352074	0.726293	1.16557	0.246532	-0.939676	0.350401	3.88333	0.000207693	2.50022	0.0153125
C12orf26	-1.26083	0.210396	-0.640781	0.524651	-2.70087	0.00811123	-3.58561	0.000595957	-2.41143	0.0181241	-3.54732	0.000786643
C12orf28	1.22577	0.223254	-0.577367	0.566335	0.715285	0.476083	1.00839	0.316511	0.273979	0.78479	-1.21486	0.229429
C12orf29	1.12729	0.262402	1.71289	0.0930551	3.32805	0.00122106	1.36161	0.177397	3.97062	0.000153091	2.88488	0.00551832
C12orf32	0.302255	0.763105	0.882215	0.381968	3.42413	0.000892462	3.66231	0.000463137	3.16649	0.00216687	2.91713	0.00504604
C12orf33	2.02988	0.0451077	0.865888	0.390771	2.34741	0.020855	1.75814	0.0828041	1.94637	0.0550346	1.64307	0.105875
C12orf34	-0.749856	0.455156	-3.40856	0.00131448	4.2493	4.78517e-05	3.71654	0.000386769	-1.59727	0.114052	-2.20961	0.031165
C12orf35	-0.205422	0.837673	-1.67153	0.100992	-1.29387	0.198663	-2.47736	0.0154874	-2.44325	0.0167025	-4.57948	2.57827e-05
C12orf36	-1.39238	0.166992	0.0191471	0.984802	0.651306	0.516328	1.38463	0.17027	0.585818	0.559607	0.677962	0.500539
C12orf37	-0.00490079	0.9961	-0.0741784	0.94117	1.5447	0.125548	-0.465058	0.643237	1.13891	0.258057	-0.894727	0.374696
C12orf39	2.82905	0.00567362	-0.236619	0.813939	3.0947	0.00254905	-0.508628	0.612506	3.60654	0.000531831	0.176423	0.860587
C12orf4	0.396393	0.692686	-0.232564	0.817069	2.32356	0.0221531	-0.94703	0.346665	0.473432	0.637163	-2.14326	0.0363737
C12orf40	0.361329	0.718639	-0.288396	0.77426	1.52921	0.129338	-0.581209	0.562842	1.70226	0.0924953	-0.820191	0.415524
C12orf41	-0.398901	0.690843	-0.911925	0.366273	2.59146	0.0109716	-0.90888	0.366325	2.49644	0.0145476	0.186678	0.852576
C12orf42	2.36467	0.0200377	0.221738	0.82544	3.16073	0.00207746	0.815418	0.417415	1.9328	0.056713	-0.375254	0.708864
C12orf43	-0.3066	0.759805	-0.499129	0.619922	2.50123	0.0139836	1.85473	0.0675646	1.86709	0.0654627	1.69111	0.0962772
C12orf44	1.35074	0.179922	0.309717	0.758089	1.55186	0.123823	0.0717969	0.942955	0.321128	0.748931	-0.470365	0.639889
C12orf47	-1.75553	0.0823249	1.17086	0.247317	-0.851665	0.396415	0.074068	0.941154	0.428201	0.669627	1.95703	0.0552477
C12orf48	-0.264383	0.792046	1.02306	0.311304	5.81354	7.1883e-08	3.84809	0.000248245	6.47142	6.65303e-09	4.19284	9.71189e-05
C12orf49	1.28568	0.201616	-2.75392	0.00823915	4.45399	2.18102e-05	0.860992	0.391986	-0.492309	0.623816	-3.05766	0.00339389
C12orf5	0.523341	0.60193	2.31308	0.0249579	-0.698802	0.486282	-0.82283	0.413213	-0.281541	0.779005	-0.861265	0.392701
C12orf50	-0.0203526	0.983804	-1.26044	0.213479	0.734914	0.464095	-1.41114	0.162338	0.0180859	0.985614	-0.633494	0.528945
C12orf51	-4.50491	1.8534e-05	-2.17379	0.0345815	-3.03981	0.00301475	-1.01598	0.312908	-5.51805	3.90514e-07	-2.43923	0.0178549
C12orf52	0.976771	0.331112	0.203344	0.839708	2.71963	0.00769533	1.5061	0.136243	2.36409	0.020439	1.72093	0.0906874
C12orf53	-4.11471	8.13662e-05	-4.26031	9.23074e-05	-2.98483	0.00355907	-2.77046	0.00705294	-4.17679	7.33475e-05	-2.76579	0.00763982
C12orf54	0.589999	0.556563	-1.12897	0.264408	0.427772	0.669728	-0.858748	0.393216	-0.433375	0.66588	-0.910978	0.366143
C12orf57	-0.394488	0.694087	0.210726	0.833975	1.43919	0.153188	-0.77385	0.441452	1.83021	0.0708517	0.773907	0.442184
C12orf59	0.471772	0.638149	-1.35403	0.181938	0.291366	0.771369	-2.02034	0.0469196	0.480759	0.631968	-1.68335	0.0977765
C12orf60	-1.00814	0.315894	-1.21243	0.231163	-1.77381	0.079108	-2.11276	0.0379491	-0.0987641	0.921567	-0.830831	0.409536
C12orf61	2.69954	0.00819289	1.30458	0.198131	3.13814	0.00222878	1.21182	0.229385	3.02446	0.00332506	1.57173	0.121548
C12orf62	2.44206	0.0164147	1.87747	0.0664132	1.17414	0.2431	0.627651	0.532139	1.915	0.0589795	2.51192	0.0148639
C12orf63	3.80509	0.000248121	3.39478	0.00136908	2.51304	0.0135511	2.0499	0.0438702	1.38029	0.17125	-0.240654	0.810687
C12orf64	0.830928	0.408055	1.11783	0.269089	-0.320628	0.749155	0.0869263	0.930962	0.214729	0.830512	-0.00729112	0.994208
C12orf65	0.0400196	0.96816	-2.54209	0.0142313	2.58718	0.0111001	0.334437	0.738983	2.31753	0.0229679	0.312391	0.755884
C12orf66	2.04444	0.0436195	1.91688	0.061094	1.76507	0.0805741	2.03543	0.0453408	3.83404	0.000246294	3.56619	0.000741822
C12orf67	0.39455	0.694041	-0.801526	0.426697	1.38562	0.168914	0.772338	0.442341	2.14193	0.0351663	1.06443	0.291622
C12orf72	-1.66355	0.099431	-1.03719	0.304739	-2.85216	0.00526689	-0.769517	0.444003	-1.78123	0.0785783	-1.02892	0.307864
C12orf75	-1.06402	0.289959	0.0414039	0.967142	2.86047	0.00514102	1.57655	0.119109	-0.618999	0.537633	-2.21816	0.030544
C12orf76	2.36124	0.0202132	-0.554052	0.582063	3.11161	0.0024196	-1.36087	0.177629	3.92419	0.000180148	0.391108	0.697176
C13orf1	-0.367195	0.714274	-3.32838	0.0016638	-0.868112	0.387391	-4.27138	5.62797e-05	-2.66747	0.00920686	-4.85852	9.62878e-06
C13orf15	0.53167	0.59617	1.50047	0.139909	-2.85398	0.00523917	-2.49025	0.0149788	-5.34486	7.96986e-07	-3.57444	0.000723015
C13orf16	2.57578	0.0115103	1.42078	0.161715	2.41209	0.017666	1.50934	0.135414	2.16232	0.0335075	2.06914	0.0430784
C13orf18	1.39824	0.16523	2.87693	0.00593146	-0.18521	0.853436	0.59886	0.551071	-6.79227	1.6172e-09	-4.34081	5.87989e-05
C13orf23	-2.05477	0.0425903	-0.347172	0.729949	1.17032	0.244627	0.411859	0.681618	0.0660599	0.947491	-0.607748	0.545768
C13orf26	0.678614	0.498998	1.03084	0.307676	1.32474	0.188248	0.215736	0.829779	-0.815026	0.417418	0.555487	0.580735
C13orf27	0.592412	0.554953	1.00201	0.321263	3.68727	0.000366992	1.21946	0.226491	3.89267	0.000201063	1.32685	0.189848
C13orf28	2.15124	0.0339413	-0.158569	0.87466	2.77832	0.0065159	-0.474956	0.636198	2.59185	0.0112988	-1.56379	0.123402
C13orf29	1.72192	0.0882715	-0.235405	0.814876	0.767535	0.444554	-1.06298	0.291201	-0.442263	0.659463	-1.66532	0.101336
C13orf30	1.74791	0.0836438	0.602464	0.549643	1.83674	0.0691894	-0.266717	0.790419	0.132691	0.894763	-1.90407	0.0619532
C13orf31	1.38393	0.169557	0.0429868	0.965887	-0.656416	0.51305	-2.36396	0.0206711	-6.29924	1.41005e-08	-7.57504	3.50082e-10
C13orf33	3.21426	0.00177634	5.20488	3.81746e-06	2.31516	0.0226274	0.182014	0.856063	-0.746182	0.457691	1.04777	0.299168
C13orf34	0.919181	0.360281	0.148091	0.882879	6.35199	6.15999e-09	3.14237	0.00239988	6.19327	2.23192e-08	2.59499	0.0120065
C13orf35	1.17068	0.244597	-0.646718	0.520832	2.70947	0.00791802	0.557699	0.578711	2.27589	0.0254603	-0.0340706	0.97294
C13orf36	2.45144	0.0160179	2.13679	0.0376338	2.9566	0.00387263	0.87642	0.3836	2.71355	0.00811131	0.703674	0.4845
C13orf38	2.30163	0.0234955	2.89408	0.00566222	1.57321	0.118797	1.30073	0.197332	5.29333	9.83644e-07	6.39677	3.19596e-08
C14orf1	1.92876	0.0566837	0.36677	0.715369	5.94976	3.89463e-08	2.3838	0.0196653	3.28679	0.00149301	1.35823	0.179742
C14orf101	1.81277	0.0729608	1.3115	0.195801	4.0315	0.000107681	1.21992	0.226317	1.69871	0.0931648	0.113684	0.909888
C14orf102	-3.65775	0.000413617	0.811188	0.42118	-1.62646	0.106969	-0.453746	0.651322	1.05334	0.295277	1.98506	0.0519574
C14orf104	1.8315	0.0700955	1.23603	0.222339	4.47948	1.97474e-05	1.60361	0.113003	6.39816	9.16525e-09	3.80705	0.000346041
C14orf105	0.016193	0.987114	-1.27023	0.210003	-0.13402	0.893653	2.24308	0.0278451	1.51177	0.134438	1.13455	0.261313
C14orf106	1.9954	0.0488037	2.6959	0.00959348	5.63817	1.56739e-07	2.81771	0.00618012	6.53126	5.11753e-09	4.72339	1.55549e-05
C14orf118	2.02454	0.0456632	2.24265	0.0294764	4.7608	6.45295e-06	2.1221	0.0371314	3.02095	0.00335987	1.28822	0.202873
C14orf126	1.38301	0.169838	2.24242	0.0294925	0.278902	0.78089	0.109614	0.913008	2.63708	0.0100011	2.41418	0.0190048
C14orf128	3.09169	0.00259848	0.851906	0.398411	1.68476	0.095122	0.572265	0.568854	1.28019	0.204087	1.14429	0.257287
C14orf129	3.04718	0.00297597	0.796557	0.429551	6.27707	8.71692e-09	1.70234	0.0928334	2.05507	0.0430552	-1.00903	0.317226
C14orf132	-3.35975	0.00111654	-3.66079	0.000615423	0.14873	0.882064	-1.69614	0.0940062	-4.57999	1.64072e-05	-4.31854	6.34409e-05
C14orf135	-0.0141216	0.988762	0.381639	0.70438	3.48491	0.000729684	0.94191	0.349263	3.11025	0.00257118	1.25152	0.215855
C14orf138	0.568343	0.571115	1.61785	0.112115	3.02826	0.00312222	1.57341	0.119834	1.57479	0.119156	1.72126	0.0906269
C14orf139	-3.20465	0.00183074	-0.524668	0.60218	-1.00287	0.318321	-0.62125	0.536319	-4.59244	1.56481e-05	-4.2776	7.2923e-05
C14orf142	0.957867	0.340511	1.47677	0.146135	4.1012	8.33016e-05	1.23995	0.21886	2.3382	0.0218133	-0.660993	0.511279
C14orf143	0.686635	0.493951	-1.34848	0.183703	6.0769	2.18605e-08	1.88991	0.0626344	2.94885	0.00415453	-0.635782	0.527463
C14orf145	-0.0290478	0.976886	0.987943	0.328034	6.69789	1.21591e-09	3.61064	0.000549084	5.7223	1.66422e-07	3.55275	0.00077349
C14orf147	1.94916	0.0541645	1.45194	0.152893	3.54453	0.000597526	0.460384	0.646573	2.4551	0.0161991	-0.0123787	0.990167
C14orf148	-0.801007	0.425085	-0.825369	0.413163	1.62954	0.106313	1.19761	0.234841	0.613857	0.541009	-0.26514	0.791858
C14orf149	4.43613	2.41932e-05	4.44627	5.01062e-05	2.26769	0.025478	1.44602	0.152336	3.23157	0.00177337	2.91954	0.00501227
C14orf153	-0.439091	0.661572	-0.779097	0.439669	1.72707	0.0872116	-0.113276	0.910114	1.70584	0.0918239	0.223105	0.824252
C14orf156	5.46501	3.58425e-07	3.55879	0.000839081	7.26764	7.89556e-11	3.1515	0.00233469	8.13262	3.81484e-12	4.33085	6.08332e-05
C14orf159	1.69654	0.0929913	2.02984	0.0478208	-0.407337	0.684623	-0.0146796	0.988327	2.4046	0.0184429	3.30998	0.00162177
C14orf162	-0.958754	0.340067	-2.0037	0.0506477	3.86794	0.000194515	1.56221	0.122449	2.9111	0.00463659	-0.171213	0.864663
C14orf166	2.9049	0.00455021	1.42051	0.161791	4.04449	0.00010267	0.747111	0.457332	4.80909	6.78855e-06	3.46464	0.0010152
C14orf166B	-1.19899	0.233452	-0.841967	0.403897	0.61248	0.541597	-0.27296	0.785634	0.883656	0.379466	-0.227332	0.820979
C14orf169	2.53998	0.0126738	1.69198	0.0970004	5.33532	5.86381e-07	2.71298	0.0082665	5.65543	2.20328e-07	3.23864	0.00200498
C14orf177	0.896943	0.37197	0.0952246	0.924525	1.92102	0.0575485	1.14132	0.257366	1.96415	0.0529009	-0.294101	0.769749
C14orf178	0.432535	0.666313	-0.571805	0.570068	1.73641	0.0855402	2.66509	0.00941964	0.618495	0.537963	-0.129768	0.897207
C14orf179	1.67654	0.0968536	1.93291	0.0590372	3.49329	0.000709577	0.956305	0.341991	2.33841	0.0218017	1.01289	0.315392
C14orf181	2.76174	0.0068775	-0.255329	0.799538	2.32619	0.0220066	1.59925	0.113969	2.99719	0.00360465	2.06689	0.0432967
C14orf2	0.596525	0.552214	1.03723	0.304718	3.4155	0.000918193	1.40513	0.164113	2.73196	0.00770784	1.94277	0.0569895
C14orf21	2.38514	0.019016	2.67128	0.0102278	4.19417	5.89033e-05	2.07856	0.0410787	4.74398	8.74299e-06	3.35395	0.00142122
C14orf37	-1.75922	0.0816925	0.341263	0.734364	-2.9775	0.00363815	-3.30376	0.00146417	-1.15213	0.252614	-2.29396	0.0254985
C14orf39	2.13436	0.0353341	2.5683	0.013319	3.16687	0.002038	3.03506	0.0033046	5.74965	1.48326e-07	5.18656	2.95004e-06
C14orf4	0.789337	0.43184	-0.496262	0.621929	3.32107	0.0012489	0.44984	0.654123	0.397509	0.692025	-1.13609	0.260675
C14orf43	0.64378	0.521237	2.79166	0.0074554	-1.6482	0.10242	1.02526	0.308535	-0.366737	0.71476	2.15203	0.035644
C14orf45	3.41822	0.000922914	1.12036	0.268023	1.69358	0.0934274	-1.51794	0.133234	0.656065	0.513619	-2.68979	0.00936202
C14orf48	1.22026	0.225323	-0.335161	0.738934	2.39094	0.0186576	-0.380907	0.704349	1.50203	0.136932	0.686292	0.495311
C14orf49	-2.20354	0.0299233	-0.828014	0.411677	-0.306036	0.760207	-1.3023	0.196799	-4.12363	8.88494e-05	-3.78831	0.000367525
C14orf50	1.14667	0.254338	0.149539	0.881742	0.541747	0.589186	0.181556	0.856421	-0.360815	0.719165	-2.2478	0.0284749
C14orf79	0.527817	0.598832	1.67249	0.100802	2.07401	0.0406221	1.95029	0.054879	0.537969	0.592056	-1.12157	0.26675
C14orf80	1.20987	0.229268	-0.408646	0.68458	2.87661	0.0049044	1.68286	0.0965615	2.91221	0.00462169	1.08	0.28469
C14orf93	-0.462883	0.644485	-0.165011	0.869614	3.9287	0.000156433	0.893595	0.374397	5.16155	1.6779e-06	3.53324	0.000821749
C15orf17	-2.34992	0.0208033	-2.82993	0.00673145	-3.01175	0.00328209	-2.27563	0.0257246	-4.19463	6.87539e-05	-4.4347	4.26031e-05
C15orf2	2.01737	0.0464193	0.730563	0.468525	2.16581	0.0326794	1.85063	0.0681607	2.00684	0.0480618	1.18372	0.241439
C15orf21	0.261021	0.79463	-2.37318	0.0216021	0.21758	0.828196	-0.941022	0.349715	-0.194806	0.846026	-2.22798	0.0298437
C15orf24	2.98371	0.00360275	0.110038	0.912828	2.73273	0.00741629	-0.364373	0.716605	0.599445	0.550529	-1.00241	0.320383
C15orf26	1.77037	0.0798067	1.13733	0.260932	1.54582	0.125276	1.98657	0.0506236	2.69348	0.00857287	2.3221	0.0238231
C15orf27	-0.947116	0.345933	-0.387991	0.699703	0.230385	0.818258	2.83633	0.00586432	-2.46055	0.0159722	-0.541203	0.590477
C15orf28	0.53215	0.595839	1.57788	0.121028	-0.165609	0.868796	1.20106	0.233509	2.56499	0.0121399	5.09214	4.15707e-06
C15orf32	-0.593855	0.553992	-1.84848	0.0705724	-0.170043	0.865317	-1.06498	0.2903	1.46553	0.146602	0.907714	0.367851
C15orf33	0.703304	0.483551	-3.02738	0.00392607	1.422	0.158108	-1.77431	0.0800699	0.0227099	0.981937	-4.12899	0.000120314
C15orf34	2.25179	0.026591	0.811385	0.421069	4.19196	5.93933e-05	3.90221	0.000206328	2.77078	0.00691651	2.69141	0.00932208
C15orf37	-0.540802	0.589884	0.667824	0.507379	1.40574	0.16287	1.82684	0.0717024	-0.237846	0.812594	-1.27196	0.208553
C15orf38	2.11018	0.0374164	1.5588	0.12548	0.693225	0.48976	0.213221	0.831733	2.05454	0.0431079	1.08352	0.283141
C15orf39	4.003	0.000122425	3.70328	0.000540215	3.82239	0.000228703	3.60759	0.000554601	4.2981	4.7112e-05	3.14299	0.00265366
C15orf40	-1.3998	0.164763	-1.21437	0.230426	1.0931	0.276952	0.384682	0.701562	0.797698	0.42735	-0.871121	0.387342
C15orf41	-5.25353	8.83801e-07	-5.21718	3.6582e-06	-0.956255	0.341227	-2.79926	0.00650845	-2.37044	0.0201141	-3.9516	0.00021642
C15orf42	0.745988	0.457479	1.30996	0.196317	8.01918	1.95804e-12	6.07804	4.68135e-08	9.86308	1.39231e-15	7.4411	5.85332e-10
C15orf43	1.44627	0.151326	-1.58295	0.119866	1.42485	0.157283	-0.515137	0.607972	1.67769	0.0972146	0.312072	0.756125
C15orf44	1.41059	0.161565	0.951567	0.345987	2.58629	0.0111271	-0.148147	0.882624	3.10996	0.00257344	1.34838	0.182868
C15orf48	2.03248	0.0448388	1.39045	0.170677	2.55404	0.0121417	-0.669528	0.505215	1.0152	0.312999	-1.93791	0.0575928
C15orf5	3.44735	0.000838682	3.13419	0.0029092	-0.4271	0.670216	-0.0375869	0.970117	-1.2568	0.212396	-0.740435	0.462075
C15orf50	0.711462	0.478506	-1.05115	0.298345	1.50394	0.135718	0.113595	0.909863	2.1736	0.0326191	-0.210728	0.833851
C15orf51	-0.561555	0.575715	-0.205703	0.837875	-0.296737	0.767277	0.764054	0.447232	-1.3269	0.188224	-0.578539	0.56518
C15orf52	2.62938	0.00994773	2.23347	0.0301159	-0.257451	0.797354	1.10113	0.274361	0.780698	0.437228	1.47125	0.146724
C15orf53	1.16958	0.245034	-1.94567	0.0574427	2.17486	0.0319745	1.60937	0.111737	2.17015	0.0328885	-0.830491	0.409726
C15orf54	0.830573	0.408255	0.537822	0.593134	-0.465871	0.642311	1.36651	0.175863	0.351648	0.726005	0.444004	0.658721
C15orf55	-0.513828	0.608541	-1.02183	0.311882	0.350071	0.727014	1.17599	0.24332	1.17308	0.244158	0.775375	0.441323
C15orf57	3.3005	0.00135116	0.492035	0.624892	0.989339	0.324861	-0.157398	0.875354	-0.451766	0.65263	-0.081487	0.93534
C15orf63	-0.038995	0.968975	-0.889423	0.378121	-2.0561	0.0423516	-0.280331	0.779996	-2.12136	0.0369109	-1.30701	0.196457
C16orf11	1.14878	0.253473	-0.738194	0.463918	1.62342	0.107618	0.8449	0.400854	1.41961	0.159511	0.286674	0.775401
C16orf13	1.18572	0.238628	-0.692541	0.491867	0.924583	0.357387	-0.690549	0.49198	3.6799	0.000416221	2.96994	0.00435287
C16orf3	0.030645	0.975616	0.216252	0.829689	1.18988	0.236885	0.761431	0.448787	0.428452	0.669446	0.459185	0.647848
C16orf42	1.04404	0.299061	0.171361	0.864646	2.09076	0.0390599	0.744402	0.458959	1.92749	0.0573805	0.733628	0.466182
C16orf45	-1.22491	0.223577	-2.17152	0.0347623	-0.893539	0.373693	-1.77062	0.0806876	-1.83193	0.0705925	-3.02206	0.00375644
C16orf46	0.465328	0.642739	-0.740689	0.462417	1.90508	0.0596138	1.28227	0.203698	1.221	0.225586	1.57761	0.12019
C16orf47	-4.25742	4.7807e-05	-4.36987	6.44751e-05	-4.64352	1.03355e-05	-2.57904	0.0118658	-5.41358	6.01194e-07	-4.17595	0.000102792
C16orf48	2.75459	0.00701816	-0.531354	0.597574	5.11038	1.52565e-06	1.86741	0.0657518	3.44014	0.000916893	0.466697	0.642495
C16orf5	2.11438	0.0370468	-0.390523	0.697842	2.54848	0.0123249	1.8069	0.0747889	2.38936	0.0191726	1.06094	0.293192
C16orf52	2.46897	0.0152992	-0.160835	0.872885	4.30427	3.88335e-05	1.33454	0.186063	2.41838	0.0178046	-0.634392	0.528363
C16orf53	-0.928405	0.355502	-2.27084	0.0275877	2.11376	0.0369989	1.00951	0.315976	0.407437	0.684749	-1.4359	0.156495
C16orf54	1.69797	0.0927194	0.0596179	0.952702	2.35233	0.0205956	2.20009	0.0308801	0.212634	0.83214	0.166753	0.868154
C16orf55	-0.739641	0.461304	-1.55855	0.125539	1.79798	0.0751686	-0.105112	0.916567	-0.572311	0.568677	-2.54282	0.013736
C16orf57	1.25738	0.211634	1.01332	0.315884	1.2003	0.23283	2.56947	0.0121706	0.0708358	0.943701	0.912677	0.365257
C16orf58	1.14536	0.254878	-0.617138	0.540001	1.9639	0.052291	-0.938959	0.350766	1.33492	0.185598	-0.497772	0.62056
C16orf59	1.68931	0.0943717	-0.151301	0.880359	4.31566	3.7182e-05	3.10061	0.00272025	4.15134	8.04124e-05	2.46963	0.0165438
C16orf61	3.13012	0.00230884	1.44413	0.155065	4.40255	2.66268e-05	1.80002	0.0758785	2.64663	0.00974502	0.113027	0.910406
C16orf62	0.885837	0.377896	1.48055	0.14513	-0.0724746	0.942368	-0.924676	0.3581	0.220957	0.825675	-0.222527	0.824699
C16orf63	2.44938	0.0161044	1.21955	0.228473	3.56426	0.000559022	1.01873	0.311606	3.60208	0.000539772	0.701291	0.485975
C16orf68	0.953469	0.342722	1.87731	0.0664349	3.06105	0.0028259	2.67926	0.0090641	3.60449	0.000535474	2.80019	0.00696042
C16orf7	0.154562	0.877488	-1.60434	0.115065	0.2015	0.840713	-1.10485	0.272756	-2.10306	0.0385259	-3.10139	0.00299324
C16orf70	0.977117	0.330942	-0.340159	0.73519	3.45807	0.000797784	0.194002	0.846699	1.14591	0.255166	-1.6754	0.0993335
C16orf71	3.20297	0.00184041	0.231959	0.817536	4.2497	4.77799e-05	2.23359	0.0284915	3.96625	0.000155462	1.43723	0.15612
C16orf72	2.83553	0.00556854	-0.704441	0.484493	3.92468	0.000158719	-0.512035	0.610131	-0.159416	0.873733	-2.87999	0.0055934
C16orf73	-1.09045	0.278218	1.57471	0.12176	-0.0560678	0.955399	2.06555	0.0423258	1.07973	0.283427	2.13562	0.0370197
C16orf74	2.41912	0.0174221	-0.0169608	0.986537	1.05317	0.294778	2.3653	0.0206018	1.98747	0.0502081	1.03415	0.305433
C16orf75	2.45403	0.0159096	-0.0126874	0.989929	7.54038	2.08501e-11	4.80363	7.79472e-06	6.45334	7.20127e-09	3.08424	0.00314478
C16orf78	0.349395	0.72755	-2.43409	0.0186202	1.18024	0.240677	0.0605786	0.951856	1.83353	0.0703517	-0.815793	0.418015
C16orf80	0.346578	0.729659	-2.33486	0.0236917	1.86877	0.0645533	-2.23141	0.0286417	0.475326	0.635818	-1.98242	0.0522596
C16orf81	0.556873	0.578897	0.379571	0.705904	0.0825855	0.934345	2.88808	0.00506286	1.77301	0.0799403	2.02168	0.0479136
C16orf82	0.606548	0.545568	0.111773	0.91146	-0.243365	0.808217	0.723119	0.471856	0.343423	0.732159	0.859121	0.393872
C16orf85	0.629287	0.530641	-0.749194	0.457322	3.7631	0.000281821	1.73848	0.0862303	2.03896	0.0446758	0.44554	0.657617
C16orf87	0.203855	0.838894	-1.43906	0.15649	1.38618	0.168743	-1.06226	0.291528	1.81738	0.072812	-1.13065	0.262935
C16orf89	1.09011	0.278367	1.49434	0.1415	1.40457	0.163218	-0.0670158	0.946747	1.38675	0.169276	-0.31915	0.750779
C17orf101	-3.6358	0.000445844	-0.0629721	0.950045	-0.390133	0.69726	1.7429	0.0854497	-1.32787	0.187905	0.779731	0.438775
C17orf102	2.07478	0.0406549	0.363171	0.718039	3.2663	0.00148885	2.91868	0.0046377	2.36492	0.0203965	1.02624	0.309115
C17orf103	0.78759	0.432857	-0.074367	0.941021	1.53736	0.127332	0.391481	0.696552	0.721812	0.472463	-0.232266	0.817163
C17orf106	1.75593	0.0822571	2.13845	0.037492	0.787748	0.432689	-1.75187	0.0838839	4.19051	6.979e-05	2.81705	0.0066482
C17orf108	2.11041	0.037396	1.28826	0.203706	-0.337854	0.736174	-0.236334	0.813818	-0.380853	0.704297	-0.459817	0.647396
C17orf28	-1.62785	0.106801	-5.16329	4.40839e-06	1.41085	0.16136	0.132458	0.894977	-8.09594	4.5104e-12	-8.79952	3.28678e-12
C17orf37	1.78515	0.0773624	0.432218	0.667479	2.84928	0.00531116	1.70958	0.0914778	1.52759	0.130463	-0.468812	0.640992
C17orf39	-3.25178	0.00157793	-1.04334	0.301912	-2.55075	0.0122496	-1.71068	0.0912739	-1.56127	0.12231	-1.16589	0.248514
C17orf42	-3.78279	0.000268295	-2.94591	0.00491613	-2.31509	0.0226313	-2.89921	0.00490418	-2.10894	0.0380008	-2.21942	0.0304528
C17orf44	0.556631	0.579061	0.573113	0.569189	-0.25643	0.79814	0.384629	0.7016	-1.15598	0.251047	-1.04347	0.301134
C17orf46	-0.394096	0.694375	0.589962	0.557927	0.369604	0.712451	1.46712	0.146525	0.888873	0.376672	1.07985	0.284756
C17orf47	3.14273	0.00222055	-1.14243	0.258829	5.56449	2.16767e-07	3.20946	0.00195791	2.29501	0.0242882	0.151414	0.880184
C17orf48	-0.979229	0.329903	-2.47182	0.0169644	-0.439127	0.661508	-5.78595	1.5704e-07	0.564648	0.573854	-2.75768	0.00780862
C17orf49	1.04227	0.299879	0.48317	0.631127	1.57525	0.118327	-1.34307	0.1833	1.63735	0.10539	-0.213477	0.831716
C17orf50	-0.613574	0.540933	-0.678037	0.500938	0.698239	0.486632	2.23488	0.0284025	0.439239	0.661644	1.78526	0.0795402
C17orf53	0.553976	0.58087	0.163416	0.870863	7.65041	1.21422e-11	5.26184	1.3074e-06	5.95413	6.23334e-08	4.29	6.99148e-05
C17orf54	-1.6013	0.112561	-1.13749	0.260864	0.174227	0.862036	0.145573	0.884649	-1.02978	0.30614	0.138959	0.889972
C17orf55	2.60625	0.0105968	-0.407001	0.68578	2.98191	0.00359038	1.70175	0.0929439	1.87682	0.0640992	1.261	0.212445
C17orf56	1.46854	0.145193	-1.00739	0.318696	6.35759	6.00193e-09	4.45533	2.87925e-05	2.07435	0.0411838	1.21812	0.228196
C17orf57	0.365231	0.715734	-0.727867	0.470159	1.08757	0.279372	0.604621	0.547256	-2.24687	0.0273354	-2.94291	0.00469568
C17orf58	2.57307	0.0115949	0.246534	0.806299	1.66743	0.0985276	0.592325	0.555415	2.13626	0.0356397	0.112602	0.910741
C17orf59	1.44246	0.152394	-1.17538	0.245521	1.36629	0.174882	-1.43208	0.156274	0.801666	0.425063	-1.18659	0.240311
C17orf61	0.935274	0.35197	1.26556	0.211656	0.624049	0.534002	-1.35581	0.17923	1.09519	0.276641	-0.400566	0.690237
C17orf62	1.48936	0.139636	1.00509	0.319792	5.95168	3.86101e-08	3.75833	0.000336275	0.797057	0.42772	0.238722	0.812178
C17orf63	-5.24422	9.1927e-07	-3.93553	0.00026188	-3.03976	0.00301517	-2.78627	0.00674913	-5.17063	1.61755e-06	-3.90351	0.000253225
C17orf64	1.71972	0.0886724	0.269835	0.78842	2.25804	0.0260945	0.843938	0.401388	2.09784	0.0389977	1.01186	0.31588
C17orf65	-1.97796	0.0507709	-0.903044	0.370921	3.78847	0.000257796	2.20999	0.0301566	-0.944154	0.347865	-0.756771	0.452304
C17orf66	0.519563	0.604552	-1.73439	0.0891372	1.33677	0.184301	1.20925	0.230363	0.745913	0.457853	0.0303447	0.975898
C17orf68	-6.16937	1.58351e-08	-4.36085	6.64155e-05	-6.72849	1.05178e-09	-4.57826	1.82538e-05	-7.48988	7.09108e-11	-4.40277	4.7552e-05
C17orf70	-2.41108	0.0177881	-0.637279	0.52691	0.978201	0.330312	1.86358	0.0662949	0.176476	0.860355	1.65833	0.102745
C17orf71	2.02534	0.0455797	-0.130398	0.896785	5.86651	5.66841e-08	3.38231	0.00114487	2.99744	0.003602	0.537931	0.592719
C17orf73	1.74058	0.0849282	-1.69162	0.0970692	1.81097	0.0731179	1.53902	0.128009	2.26626	0.0260699	0.620294	0.537537
C17orf74	1.05948	0.292011	-2.0571	0.0450197	3.06806	0.00276599	-0.0147646	0.988259	2.18497	0.0317448	0.543106	0.589174
C17orf75	-2.60789	0.0105496	-1.90309	0.0629119	1.13967	0.257118	-1.30364	0.196344	0.93904	0.350468	-0.502737	0.617086
C17orf76	-3.03561	0.0030821	-2.68766	0.00980156	-3.50243	0.000688236	-3.54665	0.000676578	-3.75067	0.000327645	-3.75673	0.000406642
C17orf77	0.0436086	0.965306	-0.479155	0.63396	0.717593	0.474665	1.41261	0.161906	1.07252	0.286631	1.31431	0.194007
C17orf78	1.12647	0.262748	-0.968137	0.33773	2.64417	0.00949615	-0.873212	0.385335	1.99866	0.0489583	-0.33127	0.741655
C17orf79	-0.261376	0.794357	-0.0547577	0.956554	-1.10433	0.272076	0.161627	0.872034	0.0116625	0.990723	-0.69856	0.487668
C17orf80	1.66807	0.0985277	-0.81141	0.421054	7.46668	2.99167e-11	3.9247	0.00019098	2.31116	0.0233347	-0.815329	0.418278
C17orf81	-2.32481	0.0221671	-1.44517	0.154776	-0.886024	0.377709	-2.03232	0.0456622	0.312216	0.755669	-1.82123	0.0738212
C17orf82	1.46667	0.1457	-0.328732	0.743759	2.41657	0.0174624	1.8612	0.0666343	3.32662	0.00131718	2.16457	0.034623
C17orf85	-8.29953	6.17231e-13	-5.02055	7.20933e-06	-7.27239	7.71528e-11	-5.71539	2.09761e-07	-8.21702	2.59444e-12	-6.40887	3.05203e-08
C17orf87	3.38112	0.00104173	2.21577	0.0313842	2.4589	0.0156367	0.372699	0.710424	-3.52644	0.000692636	-5.05551	4.74615e-06
C17orf88	1.41053	0.161582	-0.223705	0.823917	2.74496	0.00716431	3.01806	0.00347413	3.82031	0.000258217	2.60223	0.0117828
C17orf91	3.00728	0.00335699	3.07053	0.00348061	-0.978259	0.330284	-0.851011	0.397472	-3.01232	0.00344693	-1.07319	0.287707
C17orf97	0.698554	0.486503	-3.0615	0.00356973	0.817513	0.41556	-1.79138	0.077267	-0.203962	0.838889	-3.8436	0.000307568
C17orf99	1.98951	0.0494605	-0.799544	0.427834	3.16852	0.00202752	2.51754	0.0139518	2.30341	0.0237879	0.758048	0.451545
C18orf1	-2.49419	0.0143155	-0.369289	0.713504	-4.53842	1.56732e-05	-3.43961	0.000954658	-6.23766	1.84192e-08	-4.00191	0.000183447
C18orf10	-1.2224	0.22452	-0.592868	0.555996	1.66499	0.0990134	0.0476445	0.962126	1.40014	0.165245	-0.40552	0.686613
C18orf12	-0.354356	0.723841	0.301216	0.764524	-2.23639	0.0275254	1.52469	0.131541	-0.414209	0.679802	0.00380098	0.996981
C18orf15	-4.31923	3.7845e-05	0.565726	0.574162	-5.63462	1.59216e-07	-1.71806	0.0899115	-5.80886	1.15527e-07	-1.14157	0.258406
C18orf16	-2.89174	0.00472907	-1.55854	0.125542	-3.37018	0.00106503	-0.11467	0.909013	-2.60637	0.0108667	-1.38644	0.171013
C18orf18	-2.58849	0.011121	-2.00504	0.0504995	-0.734633	0.464266	-0.887083	0.37787	-0.896257	0.372739	-3.47989	0.000968798
C18orf19	1.38845	0.168181	0.211875	0.833083	2.00561	0.0475722	0.0926961	0.926392	1.20666	0.231034	-0.679779	0.499396
C18orf2	0.422855	0.673337	-0.146904	0.88381	1.56892	0.119794	-1.35447	0.179652	2.18109	0.0320414	-1.70592	0.0934678
C18orf20	-0.687239	0.493572	-1.06999	0.289866	-0.142285	0.887138	1.66584	0.0999179	-0.162934	0.870971	0.556232	0.58023
C18orf21	2.10901	0.0375194	0.776006	0.441475	3.95517	0.000142174	1.30448	0.196057	3.09726	0.0026741	-0.498042	0.620371
C18orf25	0.631027	0.529507	0.588194	0.559103	2.2115	0.0292553	1.45986	0.148505	0.211028	0.833389	-0.911536	0.365852
C18orf26	0.360839	0.719004	-1.77445	0.0822017	1.51344	0.133292	0.35697	0.722117	2.12558	0.0365474	0.751028	0.455725
C18orf32	0.517325	0.606107	-1.45053	0.153281	0.879791	0.381061	-1.29233	0.20021	0.312673	0.755323	-2.55202	0.0134156
C18orf34	0.859081	0.392414	0.0199355	0.984176	1.87318	0.0639353	0.101513	0.919414	1.44244	0.152987	-1.48926	0.141932
C18orf45	-3.47675	0.000761056	-0.0859206	0.93188	-1.05693	0.293063	0.574881	0.567093	-2.67698	0.00897017	0.213493	0.831704
C18orf55	0.488335	0.626415	0.135265	0.892957	3.46473	0.000780361	2.23269	0.0285533	1.96243	0.0531045	0.569619	0.571174
C18orf56	1.93683	0.0556755	-0.243967	0.808275	3.72771	0.000318922	2.3014	0.0241478	4.28166	5.00455e-05	3.51916	0.000858335
C18orf8	-0.0936632	0.92557	-1.13474	0.262006	-0.37695	0.707002	-0.672133	0.503565	-2.56089	0.012273	-3.98273	0.0001954
C19orf10	2.25835	0.026164	3.39255	0.00137814	0.199794	0.842043	0.12276	0.902626	2.55424	0.0124918	3.07111	0.00326565
C19orf12	0.815263	0.416919	-1.60919	0.113999	1.75265	0.0826967	-0.163215	0.870788	0.233549	0.815917	-1.40242	0.166212
C19orf18	1.36921	0.174096	0.399995	0.690899	0.973028	0.332864	-1.04902	0.297538	2.23914	0.0278551	0.910695	0.366292
C19orf2	1.59597	0.113749	1.55004	0.127566	3.02303	0.00317214	-0.208716	0.835236	6.42981	7.98161e-09	3.09945	0.00301004
C19orf20	1.80927	0.073507	0.251621	0.802386	2.63737	0.00967567	1.31417	0.192795	1.76253	0.0817058	-0.764157	0.447926
C19orf21	0.343087	0.732276	-1.29591	0.201079	0.502916	0.616118	-0.100349	0.920335	0.391079	0.696753	-0.427106	0.670911
C19orf22	0.694072	0.489296	-1.76062	0.0845425	2.7102	0.00790188	-1.28502	0.202739	-0.78087	0.437127	-4.43998	4.18351e-05
C19orf23	2.72706	0.00758504	-0.137244	0.8914	3.72024	0.000327324	1.83198	0.070924	3.25911	0.00162789	0.193323	0.847393
C19orf24	1.61027	0.110589	2.21093	0.0317384	1.14428	0.255212	1.84036	0.0696717	1.3092	0.194125	2.46137	0.016891
C19orf25	1.28667	0.201271	0.314118	0.754765	1.78759	0.0768417	0.771013	0.443122	3.00457	0.00352696	1.6677	0.10086
C19orf26	1.81852	0.0720712	-0.168216	0.867105	3.07676	0.00269332	0.967589	0.33636	2.57187	0.0119191	1.10653	0.273145
C19orf28	2.42912	0.0169764	2.43125	0.0187504	-0.460228	0.646342	-0.497427	0.620343	0.293764	0.76968	-0.612854	0.542411
C19orf30	1.65035	0.102107	1.33557	0.187862	4.30364	3.89275e-05	3.00253	0.00363601	2.1232	0.0367519	2.74347	0.00811271
C19orf33	-0.368786	0.713091	-1.70985	0.0936207	-0.888355	0.37646	-0.624869	0.533954	-0.486632	0.627817	-0.696021	0.489244
C19orf34	1.42679	0.156851	-3.05456	0.00363968	2.77956	0.00649282	0.917224	0.361965	2.0635	0.0422278	-0.545463	0.587564
C19orf35	0.112607	0.910575	-0.508887	0.613115	0.587799	0.557979	0.134949	0.893014	1.74302	0.0850786	0.164839	0.869654
C19orf39	2.75664	0.00697772	1.26557	0.211654	2.48447	0.0146185	2.58679	0.011624	2.19085	0.0313012	1.60967	0.112994
C19orf40	3.55018	0.000595728	0.226311	0.821901	7.32511	5.9703e-11	3.91714	0.000196012	7.1798	2.86794e-10	4.20629	9.2818e-05
C19orf42	3.34786	0.00116028	2.97435	0.00454668	4.17183	6.40452e-05	0.876776	0.383408	5.27576	1.05658e-06	3.60446	0.0006583
C19orf43	2.39433	0.0185727	-0.408885	0.684406	4.70952	7.93515e-06	-0.134607	0.893283	5.86173	9.2348e-08	1.64727	0.105005
C19orf44	0.626003	0.532783	0.220526	0.826378	2.12661	0.0358886	-1.20347	0.232581	3.42998	0.000947396	2.40323	0.0195275
C19orf45	2.00207	0.0480691	-0.061337	0.95134	1.12244	0.264337	0.52289	0.602592	2.59684	0.0111487	2.15058	0.0357635
C19orf46	0.656235	0.513227	-0.307702	0.759614	1.7508	0.0830162	2.17178	0.0330342	1.33996	0.18396	1.54795	0.12717
C19orf47	-2.4026	0.0181819	-0.769585	0.44524	1.02105	0.30967	2.42815	0.0175736	-0.648852	0.518247	0.131001	0.896236
C19orf48	2.70636	0.00803817	2.81167	0.00706825	6.55296	2.4089e-09	2.82739	0.00601395	9.92822	1.03489e-15	10.7184	2.78141e-15
C19orf50	4.86223	4.47465e-06	4.99123	7.97244e-06	4.70655	8.03033e-06	1.92826	0.0576075	8.24597	2.27285e-12	6.82453	6.23463e-09
C19orf51	1.30979	0.193362	-0.663278	0.510261	2.27164	0.0252291	1.6817	0.0967858	0.997309	0.321549	0.21233	0.832607
C19orf52	2.40618	0.0180147	-1.97974	0.0533645	4.42741	2.41837e-05	0.138446	0.890259	4.02739	0.00012528	0.599454	0.551246
C19orf53	0.413991	0.679794	4.50528	4.11959e-05	0.197262	0.844019	1.66466	0.100154	1.34731	0.181591	3.32485	0.00155116
C19orf54	1.33014	0.18659	0.477191	0.635348	3.64828	0.000419786	3.85926	0.000238982	2.95844	0.00403957	2.34878	0.0223254
C19orf55	1.80094	0.0748201	0.176497	0.860631	3.93175	0.000154725	2.40144	0.0188082	1.62605	0.107776	1.16079	0.250564
C19orf56	3.41178	0.000942559	2.36698	0.0219288	4.06447	9.54012e-05	0.775819	0.440296	3.94654	0.000166596	2.93234	0.00483655
C19orf57	0.0808751	0.935708	-2.15088	0.0364446	2.68286	0.00852993	1.89681	0.0617041	3.0666	0.00293223	-0.618968	0.538403
C19orf59	2.27439	0.0251455	-0.707596	0.482548	2.57603	0.0114413	1.40637	0.163745	1.87064	0.0649626	0.519026	0.605752
C19orf6	0.637175	0.525512	1.35424	0.181872	-0.144082	0.885723	-0.743661	0.459405	-0.0689359	0.945208	1.11102	0.271224
C19orf60	1.49579	0.137955	1.38731	0.171624	0.997606	0.320855	-0.322245	0.748163	2.24323	0.0275792	1.99904	0.0503804
C19orf61	3.00508	0.00337924	1.86757	0.0678086	4.44675	2.24332e-05	0.930922	0.354881	5.10472	2.10849e-06	3.29316	0.00170531
C19orf62	3.84409	0.000216262	0.142433	0.887322	4.84352	4.61056e-06	0.503805	0.615875	2.98864	0.00369673	-0.369492	0.71313
C19orf63	1.10313	0.2727	-1.13565	0.261628	1.95067	0.053867	-0.858262	0.393482	0.777943	0.438841	-0.483108	0.63087
C19orf66	3.98355	0.000131354	2.98948	0.00436094	-0.64916	0.517709	-1.39161	0.168153	-0.689479	0.492468	-2.55706	0.0132428
C19orf68	-0.86061	0.391575	0.560596	0.577627	0.541739	0.589191	1.65334	0.102441	0.0524937	0.958263	1.1496	0.255108
C19orf70	3.96781	0.000139033	1.06405	0.292523	3.48126	0.000738621	-0.363742	0.717074	3.30706	0.00140095	2.00378	0.0498543
C19orf73	0.516405	0.606747	0.518067	0.606743	-0.221963	0.824791	0.0979457	0.922237	1.4559	0.149239	1.54842	0.127057
C19orf75	0.691773	0.490733	-0.894306	0.37553	1.20612	0.230589	0.658645	0.51214	1.89095	0.062162	-0.396555	0.693176
C1GALT1	1.9028	0.0600326	0.856281	0.39601	2.2951	0.0237955	-0.325987	0.745342	0.472277	0.637984	-1.51895	0.134303
C1GALT1C1	1.65934	0.100278	1.17021	0.247578	1.65869	0.100281	0.398607	0.691315	-0.0762948	0.93937	-1.95147	0.0559217
C1orf101	0.270667	0.787222	-0.502644	0.617467	-1.22846	0.22213	-1.7151	0.0904556	-2.42236	0.0176241	-2.29777	0.025266
C1orf103	1.75078	0.083146	0.952868	0.345334	3.70971	0.00033953	2.87645	0.00523357	3.46216	0.000853925	1.46816	0.147556
C1orf104	2.20803	0.029598	1.2038	0.234449	0.940481	0.349215	0.238715	0.811978	1.24216	0.21772	-0.683687	0.496943
C1orf105	-0.396766	0.692412	-0.497621	0.620977	-0.16199	0.871637	0.690198	0.4922	0.391704	0.696293	1.388	0.17054
C1orf106	1.38636	0.168816	-0.235038	0.815159	1.96058	0.0526828	1.51413	0.134196	2.52593	0.0134637	1.81521	0.0747533
C1orf107	3.03277	0.00310873	3.82186	0.000374162	2.96826	0.00374016	2.15956	0.0340037	6.58376	4.06305e-09	6.14173	8.41876e-08
C1orf109	-0.0149723	0.988085	-1.43391	0.15795	1.37469	0.17227	-0.220675	0.825945	0.888846	0.376686	0.059724	0.952584
C1orf110	0.256579	0.798047	-1.01202	0.316501	0.857452	0.393225	-0.916247	0.362474	-0.256293	0.798366	-1.62289	0.110132
C1orf111	0.0303499	0.97585	-0.783813	0.436922	0.036797	0.970719	1.66871	0.0993438	-0.195669	0.845353	2.21938	0.0304563
C1orf113	-0.113178	0.910124	-0.0591187	0.953098	-3.01721	0.00322848	0.180119	0.857545	-3.51729	0.000713679	-1.45392	0.151453
C1orf114	1.93472	0.0559377	0.00862498	0.993153	3.73677	0.000309011	1.87256	0.0650266	1.93749	0.0561283	0.603671	0.548457
C1orf115	2.40208	0.0182062	1.98919	0.0522778	0.18194	0.855995	0.397311	0.692266	-0.0761528	0.939483	0.173809	0.862631
C1orf116	1.03785	0.30192	0.277324	0.782698	2.31275	0.022765	1.0587	0.293134	1.96676	0.0525939	0.94375	0.349281
C1orf118	2.07656	0.0404858	0.846616	0.401325	1.14747	0.253897	2.23268	0.0285542	1.37346	0.173353	1.03908	0.303154
C1orf124	0.483549	0.629795	0.457643	0.649232	3.48264	0.000735234	1.90437	0.0606978	1.63291	0.106322	0.523558	0.602616
C1orf125	0.0183943	0.985362	0.855089	0.396664	-0.291321	0.771403	1.54221	0.127232	-0.35974	0.719967	0.849673	0.399062
C1orf126	-1.22985	0.221728	-1.40742	0.165616	0.225965	0.821686	-1.83163	0.070977	-2.04056	0.0445123	-1.87631	0.0657361
C1orf127	1.55301	0.123678	-1.01098	0.31699	2.20895	0.0294379	0.1935	0.847091	1.52726	0.130544	-0.106756	0.915358
C1orf128	0.515049	0.607691	-2.44391	0.0181759	-0.461773	0.645237	-3.18537	0.002107	-5.82843	1.06349e-07	-9.35613	4.06765e-13
C1orf129	0.186491	0.852449	-1.00456	0.320046	0.12939	0.897306	-0.33829	0.73609	-0.150543	0.880706	0.746106	0.458669
C1orf131	1.29511	0.198358	-0.450974	0.653998	2.36933	0.0197213	-0.0359379	0.971427	3.09004	0.00273293	0.282423	0.778642
C1orf135	0.400474	0.689688	0.0129961	0.989684	6.9403	3.83143e-10	4.49433	2.49328e-05	4.60988	1.4641e-05	2.57453	0.0126596
C1orf14	1.10296	0.272773	0.751731	0.455809	2.06467	0.0415164	0.292484	0.770724	1.67624	0.0975007	0.407704	0.685018
C1orf144	0.965125	0.336882	0.503879	0.616605	2.33662	0.0214336	-0.464087	0.64393	-1.03288	0.304696	-3.27193	0.0018166
C1orf150	0.250039	0.803086	0.590074	0.557852	-0.336434	0.737242	0.550919	0.583327	-0.439488	0.661464	-0.6083	0.545405
C1orf151	2.66211	0.00909055	4.84877	1.29687e-05	-2.358	0.0203003	-0.41065	0.6825	-2.4909	0.0147597	0.242029	0.809626
C1orf156	1.07193	0.28641	2.91966	0.00528168	2.70138	0.00809976	0.981431	0.329536	4.77951	7.61723e-06	2.53341	0.014071
C1orf157	2.32628	0.0220853	-0.0102289	0.99188	3.42756	0.000882454	1.3395	0.184454	2.95636	0.00406421	0.907217	0.368112
C1orf158	0.647092	0.519101	-0.337789	0.736965	1.06304	0.2903	-0.0315616	0.974906	1.2032	0.232362	-0.137652	0.891001
C1orf159	-0.95222	0.343352	-1.35337	0.182147	-0.239866	0.81092	-0.506913	0.613703	-0.322531	0.747871	-0.507553	0.613725
C1orf161	2.23383	0.0277915	1.80262	0.0775996	0.803458	0.423597	3.13041	0.00248783	1.83621	0.0699507	-0.0432615	0.965644
C1orf162	2.47316	0.0151316	4.88248	1.15624e-05	0.689491	0.492095	0.480725	0.632111	-6.16587	2.5124e-08	-4.88656	8.71139e-06
C1orf163	-2.92305	0.00431359	-1.64079	0.107245	-0.185662	0.853082	-0.130644	0.896407	0.150756	0.880538	0.519877	0.605162
C1orf168	0.661825	0.509652	0.535415	0.594785	0.982568	0.328168	1.14752	0.254815	1.87046	0.0649877	0.886061	0.379308
C1orf170	-1.08169	0.28207	-1.00583	0.319438	0.0373955	0.970243	0.958424	0.340929	-1.40627	0.163423	0.393934	0.695099
C1orf172	-0.8708	0.386013	-0.397105	0.693015	-0.686179	0.494173	1.2257	0.224145	-0.0147788	0.988245	0.0679804	0.946039
C1orf173	-1.03918	0.301305	-3.2959	0.00182897	-1.58376	0.116375	-0.671431	0.504009	-6.87989	1.09583e-09	-6.63319	1.29667e-08
C1orf174	-0.749682	0.455261	-1.20033	0.235783	-0.0243495	0.980622	0.498219	0.619787	-1.38018	0.171283	-5.03534	5.10491e-06
C1orf175	-1.17915	0.241221	-1.05427	0.296932	-3.87306	0.000190995	-0.915077	0.363084	-6.43461	7.81601e-09	-2.3915	0.0201024
C1orf177	1.33867	0.183807	-0.226179	0.822003	2.08845	0.039272	2.2813	0.0253697	2.23579	0.0280829	1.93668	0.0577472
C1orf180	1.36095	0.176682	-0.516491	0.607835	3.31747	0.00126346	0.773016	0.441942	2.52259	0.0135825	-1.28543	0.203841
C1orf182	2.87068	0.00502896	0.920621	0.361759	4.77667	6.05138e-06	1.89604	0.0618072	3.52953	0.000685651	0.899442	0.372202
C1orf183	-0.953544	0.342685	-0.538213	0.592867	0.799203	0.426048	0.315931	0.752932	1.29515	0.198904	0.669708	0.505748
C1orf187	-2.01902	0.0462454	-1.89092	0.0645548	-2.97513	0.00366411	-3.7533	0.000341999	-2.70356	0.00833807	-4.65322	1.99161e-05
C1orf190	2.84913	0.00535379	-1.0571	0.29565	1.16321	0.247485	-1.17503	0.243699	1.19025	0.237382	-0.976147	0.333116
C1orf198	-0.153451	0.878362	2.16476	0.0353051	0.291757	0.771071	-1.33442	0.186103	-2.19039	0.0313355	-3.07414	0.00323739
C1orf201	7.14071	1.71007e-10	3.25924	0.00203409	5.67383	1.33884e-07	4.06486	0.000117328	4.72821	9.29299e-06	1.01813	0.312921
C1orf21	-1.13115	0.260779	0.171867	0.86425	-1.18744	0.237838	-1.67133	0.0988234	0.542034	0.589265	0.988628	0.327024
C1orf210	-1.09087	0.278032	0.396925	0.693146	-1.17935	0.241031	1.39141	0.168213	-1.20855	0.230309	1.80083	0.0770206
C1orf211	0.966255	0.336319	-1.27252	0.209195	1.65148	0.101747	2.64462	0.00995586	2.54603	0.0127671	1.03963	0.302901
C1orf212	0.0535401	0.957412	-1.43513	0.157602	0.19692	0.844286	0.382153	0.703429	-4.07526	0.000105659	-4.91692	7.8148e-06
C1orf213	-0.279832	0.780202	-2.40524	0.0199831	1.66031	0.0999529	-0.188463	0.851022	0.112216	0.910926	-2.49932	0.0153477
C1orf216	0.143458	0.886226	-1.05165	0.298121	-0.31806	0.751096	-0.427395	0.670316	-1.24109	0.218112	-1.07881	0.285219
C1orf220	-1.16833	0.245537	-2.60382	0.0121677	-1.47129	0.144321	0.530229	0.59752	-2.88057	0.0050638	-1.36912	0.176334
C1orf222	2.18939	0.0309672	-0.830465	0.410304	2.19552	0.0304156	0.769257	0.444157	2.83766	0.00572551	0.889938	0.37724
C1orf228	-0.044976	0.964219	-2.04305	0.0464449	1.6255	0.107173	1.00054	0.320266	-4.05544	0.000113397	-4.47301	3.73257e-05
C1orf229	0.726135	0.469505	-0.070241	0.944288	0.0710983	0.94346	0.226031	0.821792	1.00538	0.317673	0.984692	0.328937
C1orf25	0.634107	0.527503	0.440156	0.66176	1.80323	0.0743332	0.680857	0.498059	0.311239	0.756409	-1.19713	0.236212
C1orf26	-1.55967	0.122095	-2.51648	0.0151773	-0.780258	0.437064	-2.18215	0.0322301	-1.2915	0.200158	-4.47055	3.76439e-05
C1orf27	0.983534	0.327791	1.4339	0.157951	0.870752	0.385954	-0.727578	0.469137	1.11335	0.268812	-0.192048	0.848387
C1orf35	-1.24609	0.215732	0.210208	0.834377	-1.30061	0.196352	0.971659	0.334344	0.071469	0.943198	0.792126	0.431572
C1orf38	3.9174	0.00016663	3.06105	0.00357429	1.74031	0.0848502	-0.3237	0.747066	-4.6025	1.5059e-05	-4.65715	1.96427e-05
C1orf43	0.912436	0.363802	1.92551	0.0599791	1.19816	0.233659	0.415342	0.679077	3.33815	0.00127007	2.49962	0.0153358
C1orf49	1.19749	0.234033	-0.0831558	0.934066	2.51772	0.0133832	0.180729	0.857068	2.37539	0.0198637	-0.569813	0.571044
C1orf50	0.700937	0.485021	-3.95061	0.000249686	2.42355	0.0171486	-2.38978	0.019371	-1.15054	0.253267	-6.21012	6.49677e-08
C1orf51	4.64056	1.08834e-05	2.71543	0.00911621	4.47384	2.01871e-05	3.31084	0.00143228	4.96509	3.67782e-06	2.65681	0.0102148
C1orf52	-0.82599	0.410837	-1.88604	0.0652246	-0.195283	0.845564	-3.37165	0.00118398	-1.68145	0.0964801	-4.10662	0.000129644
C1orf54	2.67741	0.00871342	1.72971	0.0899769	-0.862614	0.390393	-1.90338	0.0608285	-3.19455	0.00198816	-2.50821	0.015005
C1orf55	1.69521	0.0932443	-0.157643	0.875386	0.933208	0.352938	-0.213344	0.831638	0.0252158	0.979944	-0.639731	0.524911
C1orf56	-0.545787	0.586466	-1.8842	0.0654774	1.7243	0.0877125	0.74322	0.459671	0.0608582	0.95162	-2.00994	0.0491792
C1orf57	-0.149234	0.881679	-0.54738	0.586603	-0.0751375	0.940254	-1.27128	0.207559	1.17696	0.242618	1.01887	0.312572
C1orf59	-0.222322	0.824531	-2.10384	0.0405479	-1.45658	0.148333	-0.305573	0.760776	-2.58002	0.0116627	-2.97141	0.00433485
C1orf61	0.853971	0.395225	0.106899	0.915305	1.67082	0.0978527	1.71456	0.0905557	2.66725	0.00921231	0.823075	0.413896
C1orf63	0.715858	0.475799	-0.0159732	0.987321	-1.48478	0.140716	-2.07676	0.0412496	-7.50759	6.54535e-11	-7.63728	2.75735e-10
C1orf64	2.26573	0.0256912	-0.880066	0.383119	2.52705	0.0130537	0.0454104	0.963901	2.89763	0.00482084	0.1485	0.882472
C1orf65	0.706842	0.481359	-1.65787	0.103732	1.01112	0.314375	1.58292	0.117647	1.67858	0.0970402	-0.551726	0.583293
C1orf66	-3.00376	0.00339266	-2.28049	0.0269662	-1.37182	0.173158	-0.102643	0.91852	-0.712756	0.47802	-1.20372	0.233672
C1orf74	2.73023	0.00751768	-0.582014	0.563225	4.25973	4.59985e-05	1.18503	0.239747	2.43721	0.0169643	-1.05746	0.294763
C1orf77	-4.88793	4.03064e-06	-2.91173	0.00539712	-1.51086	0.133945	0.699263	0.486551	1.91612	0.0588345	2.05293	0.0446798
C1orf83	0.353789	0.724265	-2.16934	0.034936	1.5647	0.120781	-0.896461	0.372875	-0.648014	0.518786	-1.76404	0.0830839
C1orf84	-1.18979	0.237034	-0.710437	0.480801	-0.165948	0.86853	0.604563	0.547294	-4.81371	6.66741e-06	-2.51637	0.0146968
C1orf85	3.851	0.000211041	4.76311	1.73428e-05	1.65265	0.101507	-0.0644653	0.948771	-0.958651	0.340552	-1.56172	0.123889
C1orf86	2.13753	0.035069	0.0223359	0.982271	2.43421	0.0166798	1.62198	0.109004	1.19016	0.237418	1.08003	0.284677
C1orf87	1.73577	0.0857793	-1.03222	0.307035	2.46111	0.0155463	-0.696665	0.488166	2.23986	0.0278064	-1.0983	0.276693
C1orf88	1.76539	0.0806444	4.35985	6.66351e-05	0.916721	0.361473	2.81661	0.00619928	0.480578	0.632096	0.485082	0.629477
C1orf89	-0.647477	0.518853	-3.1138	0.00308184	-0.283373	0.777471	-1.64262	0.104647	-3.57158	0.0005971	-3.13865	0.00268734
C1orf9	1.60798	0.11109	0.0318952	0.974685	2.46379	0.0154373	0.650033	0.517657	0.6977	0.487339	-1.49024	0.141673
C1orf91	-2.96678	0.00378943	-2.90896	0.00543796	-2.33372	0.0215916	-2.34929	0.0214437	-7.49557	6.91096e-11	-6.89253	4.80456e-09
C1orf92	-1.21577	0.227021	-1.64452	0.10647	-0.874561	0.383888	-1.54726	0.12601	-1.09061	0.278639	-1.38572	0.17123
C1orf93	-1.7353	0.085863	-3.43544	0.00121389	0.550692	0.583061	-1.69172	0.0948513	-3.51148	0.000727367	-5.4087	1.30698e-06
C1orf94	1.5532	0.123633	0.422329	0.674632	1.25618	0.211948	-1.13603	0.259561	2.9044	0.00472737	1.14187	0.258284
C1orf95	-1.07978	0.282918	-1.17978	0.243784	-3.78181	0.000263908	-1.65825	0.101443	-2.77314	0.00687085	-2.71167	0.00883288
C1orf96	-3.43413	0.000875963	-2.06658	0.0440793	-1.94237	0.0548773	-0.213699	0.831362	-0.726184	0.469794	0.465206	0.643557
C1orf97	1.0893	0.278722	0.546966	0.586885	1.32154	0.189307	1.64673	0.103797	-0.498515	0.619455	-1.47509	0.14569
C1QA	4.85389	4.62868e-06	4.74104	1.8687e-05	1.85657	0.0662875	-0.0490701	0.960994	-3.64596	0.000466372	-3.18937	0.00231775
C1QB	5.76128	9.84557e-08	4.87386	1.19071e-05	3.09457	0.00255005	0.361459	0.718773	-1.52594	0.130873	-2.52861	0.0142446
C1QBP	-0.594886	0.553305	0.340087	0.735245	0.384698	0.70127	0.121269	0.903802	3.17844	0.00208904	2.76068	0.00774574
C1QC	4.92431	3.47467e-06	4.15391	0.000130361	2.32524	0.0220596	-0.187989	0.851393	-2.99969	0.00357813	-2.78482	0.00725689
C1QL1	0.835744	0.405353	-2.40041	0.0202196	4.85629	4.37613e-06	1.36407	0.176626	0.450349	0.653647	-1.55553	0.125356
C1QL2	0.751272	0.454308	2.0313	0.0476671	-1.01366	0.313165	1.79852	0.0761179	0.268811	0.78875	0.725264	0.471258
C1QTNF1	3.33269	0.00121851	4.61159	2.88894e-05	1.22981	0.221624	2.20527	0.0304998	-0.350547	0.726827	0.0508538	0.95962
C1QTNF2	-1.36147	0.176518	-2.69266	0.00967474	1.59141	0.114642	-0.81294	0.418826	-3.1022	0.00263452	-7.06727	2.45811e-09
C1QTNF3	-3.6226	0.000466346	0.645781	0.521434	-5.83181	6.62361e-08	-4.23206	6.48243e-05	-1.81991	0.0724222	1.18032	0.242777
C1QTNF4	-0.567713	0.571542	-1.96717	0.0548393	1.03018	0.305387	0.502761	0.616606	-0.0950452	0.924511	-1.51903	0.134283
C1QTNF5	3.15533	0.00213543	4.08423	0.000163132	0.879539	0.381197	-1.2932	0.199911	-0.359775	0.71994	0.479387	0.633497
C1QTNF6	2.50416	0.0139429	3.09771	0.00322487	1.8463	0.0677774	0.125857	0.900182	0.723535	0.47141	0.735522	0.465037
C1QTNF7	2.83184	0.00562807	2.03262	0.0475286	0.714873	0.476337	-1.65443	0.10222	0.244415	0.80752	-1.20373	0.233669
C1QTNF8	1.26162	0.210111	-1.38991	0.170837	2.7265	0.00754785	0.943137	0.348639	2.85336	0.00547467	0.025552	0.979704
C1QTNF9	-0.295986	0.767874	-0.146337	0.884256	0.251279	0.802109	2.28839	0.0249331	-1.45502	0.149482	1.9037	0.0620028
C1R	4.40804	2.69566e-05	6.71808	1.81387e-08	1.52639	0.130039	-0.039283	0.968769	-3.8509	0.000232377	-3.0391	0.0035786
C1RL	3.82701	0.000229701	4.74592	1.83809e-05	2.25924	0.0260171	1.90013	0.0612596	-0.053919	0.957131	-1.18149	0.242315
C1S	4.19536	6.03272e-05	5.5491	1.14935e-06	1.31654	0.190972	-0.555837	0.579976	-4.9326	4.18184e-06	-4.26395	7.63782e-05
C2	4.71428	8.1187e-06	6.07345	1.80336e-07	2.95525	0.00388825	1.61513	0.110483	0.0617566	0.950907	-0.990601	0.326067
C20orf103	1.58629	0.115929	1.16256	0.250637	1.40799	0.162203	-0.346507	0.729932	-0.531736	0.596346	-0.464171	0.644293
C20orf106	1.31484	0.191664	1.00664	0.319051	2.08228	0.039844	2.57891	0.01187	2.04287	0.0442777	-0.758786	0.451107
C20orf108	2.29384	0.0239572	1.14036	0.259681	3.00687	0.00333082	0.27877	0.781189	2.19222	0.0311987	0.85856	0.394179
C20orf11	0.0808471	0.93573	0.664061	0.509764	2.91535	0.00437675	1.26178	0.21094	2.64824	0.00970242	1.11016	0.27159
C20orf111	2.75125	0.00708497	0.933423	0.355178	2.0063	0.047498	-0.539639	0.591045	2.01601	0.047073	-0.423724	0.673362
C20orf112	-5.84526	6.78875e-08	-4.3564	6.73948e-05	-3.50047	0.000692754	-3.06771	0.00300031	-5.43551	5.49282e-07	-4.53702	2.98938e-05
C20orf114	1.64864	0.102457	-1.62415	0.11076	2.53148	0.0128999	0.392475	0.69582	2.85516	0.00544656	-0.0113195	0.991008
[truncated: 15,327 more rows]

## Sheet: REACTOME comb.
	MESENCHYMAL vs. STAGE 1				11q-LOH vs STAGE 1				MYCNA vs STAGE 1
REACTOME pathway Name	NES	p-value	FDR	logP(+-)	NES	p-value	FDR	logP(+-)	NES	p-value	FDR	logP(+-)
REACTOME_3_UTR_MEDIATED_TRANSLATIONAL_REGULATION	3.82039	6.66194e-05	0.00038813	4.1764	4.20557	1.30211e-05	7.33123e-05	4.88535	5.69038	6.33785e-09	1.84624e-07	8.19806
REACTOME_A_TETRASACCHARIDE_LINKER_SEQUENCE_IS_REQUIRED_FOR_GAG_SYNTHESIS	1.80837	0.0352748	0.0558726	1.45254	-1.80837	0.0352748	0.0535921	-1.45254	-1.90926	0.0281144	0.0367186	-1.55107
REACTOME_ABACAVIR_TRANSPORT_AND_METABOLISM	1.33272	0.0913116	0.117426	1.03947	-3.10743	0.000943601	0.0026017	-3.02521	-2.43582	0.00742907	0.0114688	-2.12907
REACTOME_ABC_FAMILY_PROTEINS_MEDIATED_TRANSPORT	0.768185	0.221189	0.230836	0.655237	-3.84596	6.00414e-05	0.000253005	-4.22155	-1.91368	0.0278307	0.0364904	-1.55548
REACTOME_ABCA_TRANSPORTERS_IN_LIPID_HOMEOSTASIS	-2.49242	0.00634371	0.0147579	-2.19766	-4.1797	1.4595e-05	7.88601e-05	-4.8358	-3.10743	0.000943601	0.00197217	-3.02521
REACTOME_ABORTIVE_ELONGATION_OF_HIV1_TRANSCRIPT_IN_THE_ABSENCE_OF_TAT	-1.28646	0.0991416	0.124159	-1.00374	2.75981	0.00289176	0.00679817	2.53884	3.53935	0.000200559	0.000501397	3.69776
REACTOME_ACETYLCHOLINE_BINDING_AND_DOWNSTREAM_EVENTS	-2.9655	0.00151094	0.00473052	-2.82075	-2.63934	0.00415337	0.00921443	-2.3816	-1.45969	0.0721882	0.0832463	-1.14153
REACTOME_ACETYLCHOLINE_NEUROTRANSMITTER_RELEASE_CYCLE	-3.12756	0.000881324	0.00298226	-3.05486	-3.17318	0.00075389	0.00219306	-3.12269	-3.03265	0.00121206	0.00243869	-2.91647
REACTOME_ACTIVATED_AMPK_STIMULATES_FATTY_ACID_OXIDATION_IN_MUSCLE	-2.4596	0.00695466	0.0160124	-2.15772	-3.10743	0.000943601	0.0026017	-3.02521	-2.99191	0.0013862	0.00272362	-2.85817
REACTOME_ACTIVATED_NOTCH1_TRANSMITS_SIGNAL_TO_THE_NUCLEUS	-2.49242	0.00634371	0.0147579	-2.19766	-2.10301	0.0177322	0.0307787	-1.75124	-2.7137	0.00332681	0.00558638	-2.47797
REACTOME_ACTIVATED_POINT_MUTANTS_OF_FGFR2	3.26039	0.000556287	0.00202561	3.2547	2.82191	0.00238691	0.00583661	2.62216	2.86196	0.00210516	0.00379156	2.67671
REACTOME_ACTIVATED_TAK1_MEDIATES_P38_MAPK_ACTIVATION	2.70261	0.00343984	0.00907361	2.46346	1.38618	0.0828466	0.10593	1.08173	-1.63373	0.0511579	0.0617582	-1.29109
REACTOME_ACTIVATED_TLR4_SIGNALLING	4.22237	1.20872e-05	0.000107979	4.91767	1.50575	0.0660657	0.0873058	1.18002	-2.94972	0.00159033	0.00301848	-2.79851
REACTOME_ACTIVATION_OF_ATR_IN_RESPONSE_TO_REPLICATION_STRESS	-2.39023	0.00841897	0.0188652	-2.07474	5.61786	9.66701e-09	2.94404e-07	8.01471	5.21533	9.17464e-08	1.13834e-06	7.03741
REACTOME_ACTIVATION_OF_BH3_ONLY_PROTEINS	-1.65463	0.0489995	0.0729547	-1.30981	0.755888	0.224858	0.24457	0.648091	2.4596	0.00695466	0.010887	2.15772
REACTOME_ACTIVATION_OF_CHAPERONE_GENES_BY_ATF6_ALPHA	4.38695	5.74753e-06	5.83461e-05	5.24052	2.82191	0.00238691	0.00583661	2.62216	2.39765	0.00825021	0.0123661	2.08353
REACTOME_ACTIVATION_OF_CHAPERONE_GENES_BY_XBP1S	3.73389	9.42739e-05	0.000509383	4.02561	0.947208	0.171766	0.197399	0.765062	-2.55333	0.00533491	0.00861298	-2.27287
REACTOME_ACTIVATION_OF_CHAPERONES_BY_ATF6_ALPHA	4.25074	1.06534e-05	9.91355e-05	4.97251	2.84835	0.0021973	0.00553454	2.65811	2.60959	0.00453255	0.00746145	2.34366
REACTOME_ACTIVATION_OF_GENES_BY_ATF4	4.40721	5.23545e-06	5.56786e-05	5.28105	3.74409	9.05233e-05	0.000356768	4.04324	4.00296	3.12779e-05	9.56905e-05	4.50476
REACTOME_ACTIVATION_OF_IRF3_IRF7_MEDIATED_BY_TBK1_IKK_EPSILON	4.23357	1.15006e-05	0.000104127	4.93928	2.06111	0.0196465	0.0335794	1.70672	-1.02404	0.152908	0.157855	-0.815571
REACTOME_ACTIVATION_OF_KAINATE_RECEPTORS_UPON_GLUTAMATE_BINDING	-1.76893	0.038453	0.0595	-1.41507	-3.16982	0.000762661	0.00219306	-3.11767	-3.97481	3.52177e-05	0.000107254	-4.45324
REACTOME_ACTIVATION_OF_NF_KAPPAB_IN_B_CELLS	4.62864	1.84041e-06	2.93589e-05	5.73509	4.91452	4.44994e-07	4.32095e-06	6.35165	2.21677	0.0133195	0.0191504	1.87551
REACTOME_ACTIVATION_OF_NMDA_RECEPTOR_UPON_GLUTAMATE_BINDING_AND_POSTSYNAPTIC_EVENTS	-3.26398	0.000549289	0.00201106	-3.2602	-3.4399	0.000290961	0.000974719	-3.53617	-4.36746	6.28504e-06	2.4917e-05	-5.20169
REACTOME_ACTIVATION_OF_RAC	-2.73639	0.00310585	0.00849356	-2.50782	-1.76506	0.038777	0.0578632	-1.41143	-2.4596	0.00695466	0.010887	-2.15772
REACTOME_ACTIVATION_OF_THE_AP1_FAMILY_OF_TRANSCRIPTION_FACTORS	-2.67031	0.00378908	0.00976416	-2.42147	-2.50084	0.00619487	0.0127318	-2.20797	-3.28701	0.000506279	0.00115377	-3.29561
REACTOME_ACTIVATION_OF_THE_MRNA_UPON_BINDING_OF_THE_CAP_BINDING_COMPLEX_AND_EIFS_AND_SUBSEQUENT_BINDING_TO_43S	2.55333	0.00533491	0.0127657	2.27287	3.20306	0.000679876	0.00202452	3.16757	5.06343	2.05885e-07	1.97287e-06	6.68638
REACTOME_ACTIVATION_OF_THE_PRE_REPLICATIVE_COMPLEX	-2.21073	0.0135272	0.0275478	-1.86879	5.48357	2.08409e-08	4.65447e-07	7.68108	5.26758	6.91178e-08	8.90557e-07	7.16041
REACTOME_ACYL_CHAIN_REMODELLING_OF_PC	1.84926	0.0322099	0.0522534	1.49201	0.633868	0.263084	0.273705	0.579906	-3.42074	0.000312253	0.000749856	-3.50549
REACTOME_ACYL_CHAIN_REMODELLING_OF_PE	1.91368	0.0278307	0.0481824	1.55548	0.610437	0.270786	0.279548	0.567374	-3.41193	0.000322525	0.000766282	-3.49144
REACTOME_ACYL_CHAIN_REMODELLING_OF_PG	1.03328	0.150737	0.172934	0.821781	1.01256	0.155636	0.182301	0.80789	-1.01027	0.156183	0.160249	-0.806365
REACTOME_ACYL_CHAIN_REMODELLING_OF_PI	3.44653	0.000283923	0.00118893	3.5468	1.42392	0.0772347	0.0998981	1.11219	-1.86184	0.0313129	0.0401909	-1.50428
REACTOME_ACYL_CHAIN_REMODELLING_OF_PS	1.48713	0.0684896	0.0938405	1.16438	0.868788	0.192482	0.217109	0.715611	-3.10743	0.000943601	0.00197217	-3.02521
REACTOME_ADAPTIVE_IMMUNE_SYSTEM	5.04348	2.28569e-07	8.50785e-06	6.64098	4.68904	1.37246e-06	1.10789e-05	5.8625	-5.41805	3.01266e-08	4.77498e-07	-7.52105
REACTOME_ADENYLATE_CYCLASE_ACTIVATING_PATHWAY	-2.25385	0.0121027	0.0251047	-1.91712	-3.66477	0.00012378	0.000468546	-3.90735	-3.74422	9.04783e-05	0.000248445	-4.04346
REACTOME_ADENYLATE_CYCLASE_INHIBITORY_PATHWAY	-2.31257	0.0103731	0.0223473	-1.98409	-3.35339	0.000399146	0.00126145	-3.39887	-3.64079	0.000135902	0.000351562	-3.86677
REACTOME_ADHERENS_JUNCTIONS_INTERACTIONS	-3.63432	0.00013936	0.000681542	-3.85586	-4.07034	2.34728e-05	0.000114794	-4.62944	-4.35916	6.52821e-06	2.55784e-05	-5.18521
REACTOME_ADP_SIGNALLING_THROUGH_P2RY1	1.94972	0.0256049	0.0456257	1.59168	-1.66877	0.0475812	0.0676845	-1.32256	-2.98001	0.0014412	0.00279885	-2.84128
REACTOME_ADP_SIGNALLING_THROUGH_P2RY12	1.04722	0.1475	0.170094	0.831209	-1.57966	0.0570926	0.0785463	-1.24342	-3.40226	0.000334153	0.000791104	-3.47605
REACTOME_ADVANCED_GLYCOSYLATION_ENDPRODUCT_RECEPTOR_SIGNALING	1.67233	0.0472293	0.070633	1.32579	0.801264	0.211489	0.231911	0.674711	-2.40515	0.00808296	0.0121973	-2.09243
REACTOME_AKT_PHOSPHORYLATES_TARGETS_IN_THE_CYTOSOL	-1.89177	0.0292609	0.0488898	-1.53371	0.940564	0.173464	0.199009	0.76079	-1.35499	0.08771	0.0979428	-1.05695
REACTOME_ALPHA_LINOLENIC_ACID_ALA_METABOLISM	1.38904	0.0824096	0.108264	1.08402	1.95893	0.0250606	0.0407539	1.60101	-1.34382	0.0895041	0.0996141	-1.04816
REACTOME_AMINE_COMPOUND_SLC_TRANSPORTERS	1.03559	0.150196	0.172609	0.823343	-2.23512	0.0127048	0.0230684	-1.89603	-1.40058	0.0806706	0.0911455	-1.09328
REACTOME_AMINE_DERIVED_HORMONES	-1.49952	0.0668699	0.0925679	-1.17477	1.61658	0.0529847	0.0741123	1.27585	-2.83501	0.00229122	0.00407192	-2.63993
REACTOME_AMINE_LIGAND_BINDING_RECEPTORS	0.839011	0.200731	0.215184	0.697385	-3.26398	0.000549289	0.00168818	-3.2602	-1.90486	0.0283992	0.0369465	-1.54669
REACTOME_AMINO_ACID_AND_OLIGOPEPTIDE_SLC_TRANSPORTERS	2.18115	0.0145863	0.02926	1.83605	1.66522	0.0479342	0.0678984	1.31935	1.64066	0.0504343	0.0611048	1.29727
REACTOME_AMINO_ACID_SYNTHESIS_AND_INTERCONVERSION_TRANSAMINATION	1.01256	0.155636	0.176739	0.80789	1.51831	0.0644686	0.0853636	1.19065	4.2678	9.87033e-06	3.61373e-05	5.00567
REACTOME_AMINO_ACID_TRANSPORT_ACROSS_THE_PLASMA_MEMBRANE	1.92705	0.0269869	0.0470866	1.56885	0.807515	0.209685	0.230688	0.678433	1.82862	0.033728	0.04288	1.47201
REACTOME_AMYLOIDS	2.98156	0.00143393	0.00451047	2.84347	5.04087	2.31711e-07	2.63129e-06	6.63505	5.01113	2.70553e-07	2.29456e-06	6.56775
REACTOME_ANDROGEN_BIOSYNTHESIS	-2.14126	0.0161264	0.0317785	-1.79246	-3.03265	0.00121206	0.00324833	-2.91647	-2.04585	0.0203857	0.0278744	-1.69067
REACTOME_ANTIGEN_ACTIVATES_B_CELL_RECEPTOR_LEADING_TO_GENERATION_OF_SECOND_MESSENGERS	1.57306	0.0578525	0.082823	1.23768	-1.94972	0.0256049	0.0414378	-1.59168	-4.66907	1.51283e-06	7.97087e-06	-5.82021
REACTOME_ANTIGEN_PRESENTATION_FOLDING_ASSEMBLY_AND_PEPTIDE_LOADING_OF_CLASS_I_MHC	4.74056	1.06563e-06	2.46196e-05	5.9724	2.08183	0.0186789	0.0321719	1.72865	-2.94972	0.00159033	0.00301848	-2.79851
REACTOME_ANTIGEN_PROCESSING_CROSS_PRESENTATION	5.55811	1.36356e-08	1.36344e-06	7.86532	4.88896	5.06843e-07	4.78288e-06	6.29513	1.09922	0.135835	0.141759	0.866988
REACTOME_ANTIGEN_PROCESSING_UBIQUITINATION_PROTEASOME_DEGRADATION	2.05091	0.020138	0.0375835	1.69598	3.81797	6.72784e-05	0.000279098	4.17212	1.34939	0.0886053	0.098778	1.05254
REACTOME_ANTIVIRAL_MECHANISM_BY_IFN_STIMULATED_GENES	3.91804	4.46354e-05	0.000293193	4.35032	4.38509	5.797e-06	3.80784e-05	5.2368	2.90798	0.00181886	0.00334791	2.7402
REACTOME_APC_C_CDC20_MEDIATED_DEGRADATION_OF_CYCLIN_B	1.63719	0.0507956	0.0749626	1.29417	4.75591	9.87767e-07	8.46361e-06	6.00535	4.57886	2.33756e-06	1.11076e-05	5.63124
REACTOME_APC_C_CDC20_MEDIATED_DEGRADATION_OF_MITOTIC_PROTEINS	4.43577	4.58721e-06	5.24338e-05	5.33845	5.71433	5.50691e-09	2.30602e-07	8.25909	4.92705	4.17409e-07	3.14229e-06	6.37944
REACTOME_APC_C_CDH1_MEDIATED_DEGRADATION_OF_CDC20_AND_OTHER_APC_C_CDH1_TARGETED_PROTEINS_IN_LATE_MITOSIS_EARLY_G1	4.39033	5.65888e-06	5.83461e-05	5.24727	5.32635	5.01022e-08	8.39212e-07	7.30014	5.17592	1.13397e-07	1.25716e-06	6.9454
REACTOME_APC_CDC20_MEDIATED_DEGRADATION_OF_NEK2A	1.50263	0.0664673	0.0922011	1.17739	4.75384	9.97948e-07	8.46361e-06	6.00089	4.93607	3.98554e-07	3.03445e-06	6.39951
REACTOME_APOPTOSIS	3.98449	3.38125e-05	0.000241004	4.47092	2.84286	0.00223555	0.00560981	2.65062	1.33826	0.0904062	0.100119	1.0438
REACTOME_APOPTOSIS_INDUCED_DNA_FRAGMENTATION	-1.8703	0.0307208	0.0505723	-1.51257	2.24132	0.0125027	0.0227631	1.903	3.64332	0.000134574	0.000349474	3.87104
REACTOME_APOPTOTIC_CLEAVAGE_OF_CELL_ADHESION_PROTEINS	-1.51516	0.0648665	0.0903546	-1.18798	-1.74971	0.0400838	0.0595481	-1.39703	-1.56977	0.0582339	0.0688125	-1.23482
REACTOME_APOPTOTIC_CLEAVAGE_OF_CELLULAR_PROTEINS	1.19783	0.115492	0.139423	0.937447	-2.73639	0.00310585	0.0072506	-2.50782	-3.34923	0.000405186	0.000945905	-3.39235
REACTOME_APOPTOTIC_EXECUTION_PHASE	1.10162	0.135313	0.157943	0.868662	0.862375	0.194241	0.217992	0.71166	-1.01714	0.154543	0.159053	-0.810952
REACTOME_AQUAPORIN_MEDIATED_TRANSPORT	-1.74591	0.0404133	0.0611217	-1.39348	-2.55333	0.00533491	0.0113473	-2.27287	-4.43848	4.5299e-06	1.92091e-05	-5.34391
REACTOME_ARMS_MEDIATED_ACTIVATION	-1.64414	0.050074	0.0742248	-1.30039	-1.89177	0.0292609	0.0460207	-1.53371	-2.01602	0.0218987	0.029581	-1.65958
REACTOME_ASPARAGINE_N_LINKED_GLYCOSYLATION	2.62929	0.00427812	0.0106555	2.36875	2.12468	0.0168066	0.0294776	1.77452	2.41271	0.00791721	0.0120284	2.10143
REACTOME_ASSEMBLY_OF_THE_PRE_REPLICATIVE_COMPLEX	4.6895	1.36938e-06	2.78026e-05	5.86348	5.65994	7.5714e-09	2.64856e-07	8.12082	5.38784	3.56555e-08	5.1933e-07	7.44787
REACTOME_ASSOCIATION_OF_LICENSING_FACTORS_WITH_THE_PRE_REPLICATIVE_COMPLEX	2.57163	0.00506099	0.0122857	2.29576	5.47387	2.20152e-08	4.75813e-07	7.65728	4.5984	2.12869e-06	1.0335e-05	5.67189
REACTOME_ASSOCIATION_OF_TRIC_CCT_WITH_TARGET_PROTEINS_DURING_BIOSYNTHESIS	1.75353	0.0397555	0.0606746	1.4006	1.8703	0.0307208	0.0478672	1.51257	3.16982	0.000762661	0.00165904	3.11767
REACTOME_AUTODEGRADATION_OF_CDH1_BY_CDH1_APC_C	4.43846	4.53015e-06	5.24338e-05	5.34389	5.10658	1.64022e-07	2.03509e-06	6.7851	4.22767	1.18059e-05	4.14135e-05	4.9279
REACTOME_AUTODEGRADATION_OF_THE_E3_UBIQUITIN_LIGASE_COP1	4.49421	3.49145e-06	4.70386e-05	5.45699	4.85914	5.89478e-07	5.48542e-06	6.22953	4.16632	1.54778e-05	5.26401e-05	4.81029
REACTOME_AXON_GUIDANCE	-4.65351	1.63168e-06	2.87691e-05	-5.78737	-3.67158	0.000120529	0.000461453	-3.91891	-5.79274	3.46232e-09	1.65697e-07	-8.46063
REACTOME_BASE_EXCISION_REPAIR	-1.67591	0.0468784	0.0704226	-1.32903	4.24104	1.11241e-05	6.53784e-05	4.95374	4.75218	1.00616e-06	6.42025e-06	5.99733
REACTOME_BASE_FREE_SUGAR_PHOSPHATE_REMOVAL_VIA_THE_SINGLE_NUCLEOTIDE_REPLACEMENT_PATHWAY	-1.89611	0.0289725	0.0487728	-1.53801	2.00628	0.0224132	0.0372627	1.6495	2.72496	0.00321548	0.00542663	2.49275
REACTOME_BASIGIN_INTERACTIONS	3.45615	0.000273973	0.00116178	3.56229	1.07777	0.140568	0.167283	0.852115	-1.62684	0.0518856	0.0624117	-1.28495
REACTOME_BETA_DEFENSINS	3.53447	0.000204297	0.00091365	3.68974	2.28599	0.0111275	0.0208253	1.9536	1.00114	0.15838	0.16176	0.8003
REACTOME_BILE_ACID_AND_BILE_SALT_METABOLISM	1.94059	0.0261541	0.0459927	1.58246	-1.92257	0.027267	0.0436012	-1.56436	1.78847	0.0368499	0.0464087	1.43356
REACTOME_BILE_SALT_AND_ORGANIC_ANION_SLC_TRANSPORTERS	1.94059	0.0261541	0.0459927	1.58246	0.830572	0.203108	0.224929	0.692274	1.79242	0.0365326	0.0460958	1.43732
REACTOME_BIOLOGICAL_OXIDATIONS	3.94553	3.98123e-05	0.000270118	4.39998	-2.39765	0.00825021	0.0160222	-2.08353	2.61938	0.00440452	0.00730452	2.3561
REACTOME_BIOSYNTHESIS_OF_THE_N_GLYCAN_PRECURSOR_DOLICHOL_LIPID_LINKED_OLIGOSACCHARIDE_LLO_AND_TRANSFER_TO_A_NASCENT_PROTEIN	1.48713	0.0684896	0.0938405	1.16438	2.85361	0.00216131	0.005527	2.66528	3.50174	0.000231114	0.000571389	3.63617
REACTOME_BMAL1_CLOCK_NPAS2_ACTIVATES_CIRCADIAN_EXPRESSION	2.02093	0.0216434	0.0398381	1.66467	-2.00144	0.0226724	0.0376002	-1.6445	-2.93429	0.00167157	0.00311098	-2.77688
REACTOME_BOTULINUM_NEUROTOXICITY	-3.37531	0.000368657	0.00144445	-3.43338	-3.88595	5.09653e-05	0.000220302	-4.29273	-4.39683	5.49217e-06	2.24375e-05	-5.26026
REACTOME_BRANCHED_CHAIN_AMINO_ACID_CATABOLISM	-3.31708	0.000454815	0.00172299	-3.34217	-3.55271	0.000190643	0.00067942	-3.71978	0.99205	0.160586	0.16302	0.794291
REACTOME_CA_DEPENDENT_EVENTS	-2.34	0.00964194	0.0210427	-2.01584	-2.89755	0.00188044	0.00488331	-2.72574	-4.87528	5.43281e-07	3.83156e-06	-6.26498
REACTOME_CALNEXIN_CALRETICULIN_CYCLE	1.9729	0.0242534	0.0436821	1.61523	2.06625	0.0194026	0.0332475	1.71214	1.43574	0.0755381	0.0862189	1.12183
REACTOME_CASPASE_MEDIATED_CLEAVAGE_OF_CYTOSKELETAL_PROTEINS	0.85598	0.196004	0.211811	0.707734	-3.54438	0.000196768	0.000697536	-3.70605	-4.43872	4.52475e-06	1.92091e-05	-5.34441
REACTOME_CD28_CO_STIMULATION	0.753844	0.225471	0.233848	0.646909	-2.10301	0.0177322	0.0307787	-1.75124	-3.90039	4.80195e-05	0.000140494	-4.31858
REACTOME_CD28_DEPENDENT_PI3K_AKT_SIGNALING	0.839011	0.200731	0.215184	0.697385	1.08728	0.138457	0.165359	0.858684	-2.59038	0.00479353	0.00783332	-2.31934
REACTOME_CD28_DEPENDENT_VAV1_PATHWAY	1.0057	0.15728	0.178003	0.803325	-2.27299	0.0115133	0.0213682	-1.9388	-4.21251	1.26275e-05	4.40649e-05	-4.89868
REACTOME_CDC6_ASSOCIATION_WITH_THE_ORC_ORIGIN_COMPLEX	1.61318	0.0533532	0.0778794	1.27284	5.2895	6.13259e-08	9.4041e-07	7.21236	4.49347	3.50367e-06	1.54438e-05	5.45548
REACTOME_CDK_MEDIATED_PHOSPHORYLATION_AND_REMOVAL_OF_CDC6	4.46788	3.94995e-06	4.90086e-05	5.40341	5.02492	2.51816e-07	2.76585e-06	6.59892	4.09154	2.14261e-05	6.96869e-05	4.66906
REACTOME_CDT1_ASSOCIATION_WITH_THE_CDC6_ORC_ORIGIN_COMPLEX	5.08333	1.8544e-07	8.01555e-06	6.7318	5.81413	3.04751e-09	1.45845e-07	8.51605	4.62866	1.84024e-06	9.20118e-06	5.73513
REACTOME_CELL_CELL_COMMUNICATION	0.450624	0.32613	0.327107	0.486609	-3.694	0.000110376	0.000425011	-3.95713	-4.83062	6.80529e-07	4.6056e-06	-6.16715
REACTOME_CELL_CELL_JUNCTION_ORGANIZATION	-3.26398	0.000549289	0.00201106	-3.2602	-2.79642	0.0025836	0.00624914	-2.58777	-3.06897	0.00107399	0.00220052	-2.969
REACTOME_CELL_CYCLE	-2.46768	0.0067996	0.0157638	-2.16752	7.06775	7.8737e-13	2.63769e-10	12.1038	6.67956	1.19834e-11	4.01444e-09	10.9214
REACTOME_CELL_CYCLE_CHECKPOINTS	3.10923	0.000937885	0.00314192	3.02785	5.97747	1.13317e-09	7.13425e-08	8.9457	5.83854	2.63298e-09	1.357e-07	8.57955
REACTOME_CELL_CYCLE_MITOTIC	-2.14686	0.0159023	0.0314294	-1.79854	7.08158	7.12541e-13	2.63769e-10	12.1472	5.90891	1.72193e-09	1.00651e-07	8.76398
REACTOME_CELL_DEATH_SIGNALLING_VIA_NRAGE_NRIF_AND_NADE	-1.47182	0.0705351	0.0954718	-1.15159	-4.19702	1.35228e-05	7.42645e-05	-4.86893	-3.51674	0.000218444	0.000542064	-3.66066
REACTOME_CELL_EXTRACELLULAR_MATRIX_INTERACTIONS	3.73635	9.33568e-05	0.000508529	4.02985	1.69756	0.0447951	0.0651035	1.34877	-2.21073	0.0135272	0.0194073	-1.86879
REACTOME_CELL_JUNCTION_ORGANIZATION	0.687242	0.245965	0.251214	0.609127	-2.75981	0.00289176	0.00679817	-2.53884	-3.65419	0.000128997	0.000338934	-3.88942
REACTOME_CELL_SURFACE_INTERACTIONS_AT_THE_VASCULAR_WALL	4.15503	1.62626e-05	0.000131276	4.78881	-2.05599	0.0198916	0.0338258	-1.70133	-4.70752	1.25373e-06	7.24136e-06	-5.9018
REACTOME_CGMP_EFFECTS	-1.76893	0.038453	0.0595	-1.41507	-4.56232	2.52956e-06	1.784e-05	-5.59696	-3.41847	0.000314871	0.000752247	-3.50187
REACTOME_CHEMOKINE_RECEPTORS_BIND_CHEMOKINES	5.19381	1.03018e-07	5.30938e-06	6.98709	3.18479	0.000724298	0.00212842	3.14008	-2.88336	0.00196728	0.00358173	-2.70613
REACTOME_CHOLESTEROL_BIOSYNTHESIS	1.83272	0.0334221	0.0536998	1.47597	2.40515	0.00808296	0.015743	2.09243	1.94059	0.0261541	0.0344945	1.58246
REACTOME_CHONDROITIN_SULFATE_BIOSYNTHESIS	4.24635	1.08638e-05	9.97092e-05	4.96402	1.34382	0.0895041	0.113361	1.04816	1.47487	0.0701242	0.0810055	1.15413
REACTOME_CHONDROITIN_SULFATE_DERMATAN_SULFATE_METABOLISM	3.79435	7.40157e-05	0.000427504	4.13068	-1.94514	0.0258789	0.0417803	-1.58705	-2.67031	0.00378908	0.00633088	-2.42147
REACTOME_CHROMOSOME_MAINTENANCE	-1.92705	0.0269869	0.0470866	-1.56885	5.67339	6.99975e-09	2.60546e-07	8.15492	5.72121	5.28842e-09	1.77162e-07	8.27667
REACTOME_CHYLOMICRON_MEDIATED_LIPID_TRANSPORT	1.84926	0.0322099	0.0522534	1.49201	-2.27946	0.0113197	0.0211259	-1.94616	-0.978495	0.163915	0.165396	-0.785382
REACTOME_CIRCADIAN_CLOCK	1.89177	0.0292609	0.0488898	1.53371	0.518294	0.302127	0.307636	0.519811	-2.9667	0.00150505	0.00288935	-2.82245
REACTOME_CIRCADIAN_REPRESSION_OF_EXPRESSION_BY_REV_ERBA	-1.47182	0.0705351	0.0954718	-1.15159	-2.00628	0.0224132	0.0372627	-1.6495	-2.77181	0.0027873	0.00478844	-2.55482
REACTOME_CITRIC_ACID_CYCLE_TCA_CYCLE	-1.5665	0.0586162	0.0832053	-1.23198	1.24153	0.107204	0.132278	0.969787	1.48099	0.069305	0.0803363	1.15924
REACTOME_CLASS_A1_RHODOPSIN_LIKE_RECEPTORS	5.42695	2.86634e-08	2.40056e-06	7.54267	2.16957	0.0150196	0.0266926	1.82334	-2.65984	0.00390884	0.00649858	-2.40795
REACTOME_CLASS_B_2_SECRETIN_FAMILY_RECEPTORS	3.76801	8.22786e-05	0.000471168	4.08471	0.920755	0.178589	0.20311	0.748145	-2.07661	0.0189189	0.0261353	-1.7231
REACTOME_CLASS_C_3_METABOTROPIC_GLUTAMATE_PHEROMONE_RECEPTORS	-2.38287	0.00858922	0.0190556	-2.06605	-2.14126	0.0161264	0.0284334	-1.79246	1.06361	0.143753	0.148863	0.842383
REACTOME_CLASS_I_MHC_MEDIATED_ANTIGEN_PROCESSING_PRESENTATION	4.27915	9.38047e-06	8.852e-05	5.02778	3.78405	7.71489e-05	0.000311384	4.11267	-1.38331	0.0832844	0.0939403	-1.07944
REACTOME_CLEAVAGE_OF_GROWING_TRANSCRIPT_IN_THE_TERMINATION_REGION_	-1.38904	0.0824096	0.108264	-1.08402	4.25356	1.05201e-05	6.23757e-05	4.97798	4.42243	4.87985e-06	2.03075e-05	5.31159
REACTOME_COLLAGEN_FORMATION	4.66222	1.56406e-06	2.87691e-05	5.80575	-3.12756	0.000881324	0.00247066	-3.05486	-2.26019	0.0119048	0.017302	-1.92428
REACTOME_COMMON_PATHWAY	2.84835	0.0021973	0.00631942	2.65811	-1.71223	0.0434274	0.0635292	-1.36224	1.64066	0.0504343	0.0611048	1.29727
REACTOME_COMPLEMENT_CASCADE	5.0186	2.60242e-07	9.17696e-06	6.58462	1.32996	0.0917656	0.115137	1.03732	-2.16384	0.0152382	0.0216305	-1.81707
REACTOME_CONVERSION_FROM_APC_C_CDC20_TO_APC_C_CDH1_IN_LATE_ANAPHASE	1.11609	0.132193	0.155932	0.878792	4.35867	6.54282e-06	4.0969e-05	5.18424	4.05076	2.55258e-05	8.06711e-05	4.59302
REACTOME_COPI_MEDIATED_TRANSPORT	1.21312	0.112542	0.137097	0.948685	1.69393	0.0451396	0.0654622	1.34544	-1.51201	0.0652653	0.0761807	-1.18532
REACTOME_COSTIMULATION_BY_THE_CD28_FAMILY	3.22912	0.00062085	0.0022126	3.20701	0.905472	0.182608	0.206667	0.738481	-4.75946	9.70571e-07	6.25272e-06	-6.01297
REACTOME_CREATION_OF_C4_AND_C2_ACTIVATORS	4.49306	3.51035e-06	4.70386e-05	5.45465	1.34103	0.0899547	0.113502	1.04598	-1.78454	0.0371683	0.0467219	-1.42983
REACTOME_CREB_PHOSPHORYLATION_THROUGH_THE_ACTIVATION_OF_CAMKII	-1.99184	0.0231944	0.0423439	-1.63462	-1.47182	0.0705351	0.0924825	-1.15159	-3.01522	0.00128396	0.00255268	-2.89145
REACTOME_CREB_PHOSPHORYLATION_THROUGH_THE_ACTIVATION_OF_RAS	0.875219	0.190727	0.208462	0.719587	0.745685	0.227929	0.247107	0.642201	-3.22553	0.000628698	0.00139479	-3.20156
REACTOME_CRMPS_IN_SEMA3A_SIGNALING	-4.421	4.91236e-06	5.39554e-05	-5.30871	-2.84835	0.0021973	0.00553454	-2.65811	-4.0831	2.22196e-05	7.15726e-05	-4.65326
REACTOME_CROSS_PRESENTATION_OF_SOLUBLE_EXOGENOUS_ANTIGENS_ENDOSOMES	4.90224	4.73755e-07	1.32257e-05	6.32445	5.38503	3.6217e-08	7.13687e-07	7.44109	3.12588	0.000886367	0.00188529	3.05239
REACTOME_CS_DS_DEGRADATION	4.50583	3.30563e-06	4.61412e-05	5.48075	0.864511	0.193654	0.217698	0.712974	1.24153	0.107204	0.116225	0.969787
REACTOME_CTLA4_INHIBITORY_SIGNALING	2.09767	0.0179669	0.0345915	1.74553	1.03791	0.149655	0.177154	0.824909	-2.29918	0.0107475	0.0157912	-1.96869
REACTOME_CTNNB1_PHOSPHORYLATION_CASCADE	1.31623	0.094048	0.119795	1.02665	-1.54057	0.0617105	0.0833589	-1.20964	0.909828	0.181457	0.182	0.741227
REACTOME_CYCLIN_A_B1_ASSOCIATED_EVENTS_DURING_G2_M_TRANSITION	1.10162	0.135313	0.157943	0.868662	5.29532	5.94046e-08	9.4041e-07	7.22618	4.89889	4.81907e-07	3.50954e-06	6.31704
REACTOME_CYCLIN_E_ASSOCIATED_EVENTS_DURING_G1_S_TRANSITION_	4.1036	2.03383e-05	0.000156628	4.69169	5.39123	3.49878e-08	7.10358e-07	7.45608	4.36211	6.44056e-06	2.53834e-05	5.19108
REACTOME_CYTOCHROME_P450_ARRANGED_BY_SUBSTRATE_TYPE	3.69043	0.000111939	0.000576915	3.95102	1.14783	0.12552	0.153464	0.901288	3.0454	0.00116187	0.00235895	2.93484
REACTOME_CYTOKINE_SIGNALING_IN_IMMUNE_SYSTEM	5.56174	1.33552e-08	1.36344e-06	7.87435	2.04081	0.0206347	0.0347368	1.6854	-5.48794	2.03328e-08	3.68188e-07	-7.6918
REACTOME_CYTOSOLIC_SULFONATION_OF_SMALL_MOLECULES	-1.75736	0.0394282	0.0603125	-1.40419	-3.694	0.000110376	0.000425011	-3.95713	1.00798	0.156732	0.160321	0.804843
REACTOME_CYTOSOLIC_TRNA_AMINOACYLATION	2.22284	0.0131132	0.0267862	1.88229	3.42104	0.000311908	0.00102522	3.50597	4.98214	3.14429e-07	2.50794e-06	6.50248
REACTOME_DAG_AND_IP3_SIGNALING	-2.7137	0.00332681	0.00891586	-2.47797	-3.83967	6.15987e-05	0.000257945	-4.21043	-4.70176	1.28966e-06	7.32262e-06	-5.88953
REACTOME_DARPP_32_EVENTS	-2.45159	0.00711126	0.0163169	-2.14805	-2.10301	0.0177322	0.0307787	-1.75124	-2.97618	0.00145932	0.00281422	-2.83585
REACTOME_DCC_MEDIATED_ATTRACTIVE_SIGNALING	-3.14468	0.000831351	0.00284999	-3.08022	-3.8618	5.62771e-05	0.000241703	-4.24967	-4.09591	2.10258e-05	6.90552e-05	-4.67725
REACTOME_DEADENYLATION_DEPENDENT_MRNA_DECAY	1.43278	0.0759609	0.10118	1.11941	4.59072	2.20855e-06	1.6084e-05	5.65589	5.04883	2.22264e-07	2.06829e-06	6.65313
REACTOME_DEADENYLATION_OF_MRNA	0.998863	0.158931	0.178664	0.798792	2.73639	0.00310585	0.0072506	2.50782	2.86196	0.00210516	0.00379156	2.67671
REACTOME_DEFENSINS	3.52026	0.000215565	0.000943978	3.66642	2.4596	0.00695466	0.013951	2.15772	-1.44467	0.0742751	0.0850672	-1.12916
REACTOME_DEGRADATION_OF_THE_EXTRACELLULAR_MATRIX	0.824262	0.204895	0.218598	0.688468	-2.34	0.00964194	0.0185103	-2.01584	-2.7137	0.00332681	0.00558638	-2.47797
REACTOME_DEPOSITION_OF_NEW_CENPA_CONTAINING_NUCLEOSOMES_AT_THE_CENTROMERE	-2.17534	0.0148023	0.0296045	-1.82967	5.34977	4.40322e-08	7.5645e-07	7.35623	5.52616	1.63657e-08	3.22501e-07	7.78607
REACTOME_DESTABILIZATION_OF_MRNA_BY_AUF1_HNRNP_D0	4.63034	1.82533e-06	2.93589e-05	5.73866	5.55636	1.37731e-08	3.37946e-07	7.86097	4.08478	2.20589e-05	7.13982e-05	4.65642
REACTOME_DESTABILIZATION_OF_MRNA_BY_BRF1	3.39438	0.000343917	0.00137158	3.46355	3.5219	0.000214231	0.000755448	3.66912	4.03136	2.77273e-05	8.6006e-05	4.55709
REACTOME_DESTABILIZATION_OF_MRNA_BY_KSRP	1.88313	0.0298413	0.0494893	1.52518	3.8574	5.73007e-05	0.000244532	4.24184	4.06882	2.36259e-05	7.53779e-05	4.62661
REACTOME_DESTABILIZATION_OF_MRNA_BY_TRISTETRAPROLIN_TTP	3.23924	0.000599244	0.00214702	3.2224	3.10851	0.000940164	0.0026017	3.0268	4.20973	1.27838e-05	4.41503e-05	4.89334
REACTOME_DEVELOPMENTAL_BIOLOGY	-4.65351	1.63168e-06	2.87691e-05	-5.78737	-4.65351	1.63168e-06	1.21469e-05	-5.78737	-6.22178	2.45766e-10	3.29327e-08	-9.60948
REACTOME_DIABETES_PATHWAYS	4.73305	1.10587e-06	2.46978e-05	5.9563	1.42687	0.0768092	0.0995399	1.11459	-1.10643	0.13427	0.140889	-0.872021
REACTOME_DNA_REPAIR	-3.59592	0.000161624	0.000762593	-3.79149	5.09703	1.72515e-07	2.0814e-06	6.76317	5.67406	6.97261e-09	1.94652e-07	8.1566
REACTOME_DNA_REPLICATION	2.29918	0.0107475	0.0228597	1.96869	6.04475	7.48198e-10	5.56992e-08	9.12598	6.7472	7.53653e-12	4.01444e-09	11.1228
REACTOME_DNA_STRAND_ELONGATION	-1.28914	0.0986744	0.123805	-1.0058	5.54584	1.46275e-08	3.37946e-07	7.83483	5.75626	4.29984e-09	1.75097e-07	8.36655
REACTOME_DOPAMINE_NEUROTRANSMITTER_RELEASE_CYCLE	-4.56057	2.55073e-06	3.88407e-05	-5.59334	-4.74425	1.04638e-06	8.76341e-06	-5.98031	-4.53724	2.84981e-06	1.32596e-05	-5.54518
REACTOME_DOUBLE_STRAND_BREAK_REPAIR	-3.12756	0.000881324	0.00298226	-3.05486	3.61644	0.000149342	0.000548451	3.82582	4.69176	1.35431e-06	7.42336e-06	5.86828
REACTOME_DOWNREGULATION_OF_ERBB2_ERBB3_SIGNALING	1.46271	0.0717735	0.0965628	1.14404	2.4596	0.00695466	0.013951	2.15772	1.5665	0.0586162	0.0691424	1.23198
REACTOME_DOWNREGULATION_OF_SMAD2_3_SMAD4_TRANSCRIPTIONAL_ACTIVITY	1.11851	0.131675	0.155595	0.880496	1.06832	0.142689	0.169206	0.845611	1.32445	0.0926761	0.102295	1.03303
REACTOME_DOWNREGULATION_OF_TGF_BETA_RECEPTOR_SIGNALING	2.85708	0.00213781	0.00622754	2.67003	3.64576	0.000133301	0.000498947	3.87517	-1.06361	0.143753	0.148863	-0.842383
REACTOME_DOWNSTREAM_SIGNAL_TRANSDUCTION	-2.29918	0.0107475	0.0228597	-1.96869	-2.83501	0.00229122	0.00570675	-2.63993	-4.73798	1.07932e-06	6.69578e-06	-5.96685
REACTOME_DOWNSTREAM_SIGNALING_EVENTS_OF_B_CELL_RECEPTOR_BCR	3.53239	0.000205912	0.00091365	3.68632	4.6932	1.34481e-06	1.09881e-05	5.87134	1.00798	0.156732	0.160321	0.804843
REACTOME_DOWNSTREAM_SIGNALING_OF_ACTIVATED_FGFR	-2.69169	0.00355457	0.00926678	-2.44921	-2.52665	0.00575776	0.0121311	-2.23975	-4.13427	1.78042e-05	5.96442e-05	-4.74948
REACTOME_DOWNSTREAM_TCR_SIGNALING	2.94192	0.00163092	0.00501247	2.78757	2.05599	0.0198916	0.0338258	1.70133	-4.38248	5.86683e-06	2.36794e-05	-5.2316
REACTOME_DSCAM_INTERACTIONS	-2.59992	0.00466222	0.0114842	-2.33141	-2.57163	0.00506099	0.0109031	-2.29576	-1.21568	0.112053	0.120506	-0.950577
REACTOME_E2F_ENABLED_INHIBITION_OF_PRE_REPLICATION_COMPLEX_FORMATION	-1.40347	0.080238	0.106034	-1.09562	4.93873	3.93163e-07	4.0526e-06	6.40543	4.463	4.04095e-06	1.75808e-05	5.39352
REACTOME_E2F_MEDIATED_REGULATION_OF_DNA_REPLICATION	-1.49022	0.0680833	0.0936669	-1.16696	5.65251	7.90614e-09	2.64856e-07	8.10204	5.60732	1.02744e-08	2.54958e-07	7.98824
REACTOME_EARLY_PHASE_OF_HIV_LIFE_CYCLE	2.62929	0.00427812	0.0106555	2.36875	3.48366	0.000247305	0.000858518	3.60677	2.90008	0.00186532	0.00342401	2.72925
REACTOME_EFFECTS_OF_PIP2_HYDROLYSIS	-1.94514	0.0258789	0.0458699	-1.58705	-3.84916	5.92629e-05	0.000251305	-4.22722	-4.51119	3.22319e-06	1.45915e-05	-5.49171
REACTOME_EGFR_DOWNREGULATION	1.77281	0.0381302	0.0592743	1.41873	0.73552	0.231011	0.249239	0.636367	-2.34699	0.0094628	0.0140267	-2.02398
REACTOME_EICOSANOID_LIGAND_BINDING_RECEPTORS	3.88508	5.11476e-05	0.000314434	4.29117	1.82048	0.0343433	0.0524146	1.46416	-1.42687	0.0768092	0.0873721	-1.11459
REACTOME_ELEVATION_OF_CYTOSOLIC_CA2_LEVELS	2.42804	0.00759026	0.0171228	2.11974	-2.51796	0.00590189	0.0123186	-2.22901	-2.59038	0.00479353	0.00783332	-2.31934
REACTOME_ELONGATION_ARREST_AND_RECOVERY	0.772296	0.219969	0.230641	0.657638	3.31639	0.000455945	0.00142749	3.34109	3.3109	0.000464986	0.00107428	3.33256
REACTOME_ENDOGENOUS_STEROLS	2.61938	0.00440452	0.0108894	2.3561	-2.67031	0.00378908	0.00857663	-2.42147	-1.63028	0.0515212	0.0620849	-1.28801
REACTOME_ENDOSOMAL_SORTING_COMPLEX_REQUIRED_FOR_TRANSPORT_ESCRT	2.41271	0.00791721	0.0178004	2.10143	3.80801	7.00435e-05	0.000284419	4.15463	-1.13311	0.128585	0.135886	-0.890811
REACTOME_ENERGY_DEPENDENT_REGULATION_OF_MTOR_BY_LKB1_AMPK	-3.26398	0.000549289	0.00201106	-3.2602	-2.13018	0.0165786	0.0291539	-1.78045	-3.01522	0.00128396	0.00255268	-2.89145
REACTOME_ENOS_ACTIVATION_AND_REGULATION	0.768185	0.221189	0.230836	0.655237	-2.31257	0.0103731	0.0195775	-1.98409	-2.59992	0.00466222	0.0076561	-2.33141
REACTOME_ER_PHAGOSOME_PATHWAY	5.36022	4.15596e-08	3.09388e-06	7.38133	4.60555	2.05684e-06	1.51438e-05	5.6868	2.37557	0.00876097	0.0131023	2.05745
REACTOME_ERK_MAPK_TARGETS	1.96822	0.0245212	0.0440461	1.61046	0.647616	0.258617	0.270739	0.587344	-1.96357	0.0247903	0.0330208	-1.60572
REACTOME_ERKS_ARE_INACTIVATED	0.883821	0.188396	0.206251	0.724927	-1.85344	0.0319097	0.0494897	-1.49608	-1.61999	0.0526173	0.0629529	-1.27887
REACTOME_ETHANOL_OXIDATION	2.69169	0.00355457	0.00926678	2.44921	-2.59992	0.00466222	0.0100764	-2.33141	-2.01602	0.0218987	0.029581	-1.65958
REACTOME_EXTENSION_OF_TELOMERES	0.89462	0.185495	0.204747	0.731668	5.35281	4.32992e-08	7.5645e-07	7.36352	5.72478	5.17839e-09	1.77162e-07	8.28581
REACTOME_EXTRACELLULAR_MATRIX_ORGANIZATION	4.42832	4.74851e-06	5.3025e-05	5.32344	-3.81391	6.83916e-05	0.000279405	-4.165	-2.99823	0.00135774	0.00267556	-2.86718
REACTOME_EXTRINSIC_PATHWAY_FOR_APOPTOSIS	5.10552	1.64939e-07	7.89353e-06	6.78268	1.28111	0.100078	0.125098	0.999661	-2.24132	0.0125027	0.0180925	-1.903
REACTOME_FACILITATIVE_NA_INDEPENDENT_GLUCOSE_TRANSPORTERS	1.89611	0.0289725	0.0487728	1.53801	-2.02586	0.0213893	0.0359169	-1.6698	-2.09236	0.018203	0.0254083	-1.73986
REACTOME_FACTORS_INVOLVED_IN_MEGAKARYOCYTE_DEVELOPMENT_AND_PLATELET_PRODUCTION	-2.07661	0.0189189	0.0361129	-1.7231	3.96934	3.60363e-05	0.000164247	4.44326	2.16957	0.0150196	0.0213654	1.82334
REACTOME_FANCONI_ANEMIA_PATHWAY	0.715303	0.237211	0.24376	0.624865	5.85138	2.43763e-09	1.25631e-07	8.61303	5.06322	2.06121e-07	1.97287e-06	6.68588
REACTOME_FATTY_ACID_TRIACYLGLYCEROL_AND_KETONE_BODY_METABOLISM	-2.05599	0.0198916	0.0372273	-1.70133	-4.65351	1.63168e-06	1.21469e-05	-5.78737	-3.76604	8.29285e-05	0.000230548	-4.0813
REACTOME_FATTY_ACYL_COA_BIOSYNTHESIS	-1.3466	0.0890543	0.115409	-1.05035	0.693232	0.244082	0.259168	0.612464	-1.6064	0.054093	0.0644881	-1.26686
REACTOME_FGFR_LIGAND_BINDING_AND_ACTIVATION	3.51406	0.000220658	0.000960006	3.65628	2.86196	0.00210516	0.00540406	2.67671	2.99823	0.00135774	0.00267556	2.86718
REACTOME_FGFR1_LIGAND_BINDING_AND_ACTIVATION	2.55333	0.00533491	0.0127657	2.27287	2.02093	0.0216434	0.0362527	1.66467	2.60959	0.00453255	0.00746145	2.34366
REACTOME_FGFR2C_LIGAND_BINDING_AND_ACTIVATION	2.05599	0.0198916	0.0372273	1.70133	1.52463	0.0636758	0.0846484	1.19603	2.41271	0.00791721	0.0120284	2.10143
REACTOME_FGFR4_LIGAND_BINDING_AND_ACTIVATION	2.18699	0.0143717	0.0290908	1.84249	1.73082	0.0417421	0.0614664	1.37943	2.34	0.00964194	0.0142607	2.01584
REACTOME_FORMATION_OF_ATP_BY_CHEMIOSMOTIC_COUPLING	2.99823	0.00135774	0.00429099	2.86718	3.29164	0.000498032	0.00155201	3.30274	4.65609	1.61137e-06	8.24137e-06	5.7928
REACTOME_FORMATION_OF_FIBRIN_CLOT_CLOTTING_CASCADE	4.45598	4.17563e-06	5.08668e-05	5.37928	0.790881	0.214507	0.234836	0.668559	1.2678	0.102434	0.111776	0.989557
REACTOME_FORMATION_OF_INCISION_COMPLEX_IN_GG_NER	0.824262	0.204895	0.218598	0.688468	2.61938	0.00440452	0.00964387	2.3561	2.53545	0.00561522	0.00902206	2.25063
REACTOME_FORMATION_OF_RNA_POL_II_ELONGATION_COMPLEX_	0.843242	0.199546	0.214946	0.699956	3.61564	0.000149801	0.000548451	3.82449	3.77337	8.05283e-05	0.000224808	4.09405
REACTOME_FORMATION_OF_THE_HIV1_EARLY_ELONGATION_COMPLEX	0.71329	0.237833	0.244025	0.623727	2.78401	0.00268458	0.00642381	2.57112	3.66396	0.000124173	0.000328838	3.90597
REACTOME_FORMATION_OF_THE_TERNARY_COMPLEX_AND_SUBSEQUENTLY_THE_43S_COMPLEX	2.56243	0.00519715	0.0125707	2.28423	3.06037	0.00110532	0.00299824	2.95651	4.86212	5.80674e-07	4.05262e-06	6.23607
REACTOME_FORMATION_OF_TRANSCRIPTION_COUPLED_NER_TC_NER_REPAIR_COMPLEX	0.873073	0.191312	0.20876	0.718259	2.06625	0.0194026	0.0332475	1.71214	2.87583	0.00201482	0.00365835	2.69576
REACTOME_FORMATION_OF_TUBULIN_FOLDING_INTERMEDIATES_BY_CCT_TRIC	0.815874	0.207286	0.219749	0.68343	2.26019	0.0119048	0.0219731	1.92428	2.92727	0.00170974	0.00316444	2.76707
REACTOME_FRS2_MEDIATED_CASCADE	2.36116	0.00910892	0.0200756	2.04053	3.41879	0.000314501	0.00102788	3.50238	2.15248	0.0156796	0.02221	1.80466
REACTOME_G_ALPHA_I_SIGNALLING_EVENTS	3.63784	0.000137466	0.000681542	3.8618	0.512612	0.304112	0.309188	0.516967	-4.62903	1.83693e-06	9.20118e-06	-5.73591
REACTOME_G_ALPHA_Q_SIGNALLING_EVENTS	1.58297	0.0567142	0.0817172	1.24631	-4.19702	1.35228e-05	7.42645e-05	-4.86893	-4.90814	4.59709e-07	3.38467e-06	-6.33752
REACTOME_G_ALPHA_S_SIGNALLING_EVENTS	1.10643	0.13427	0.15755	0.872021	-3.96975	3.59748e-05	0.000164247	-4.444	-3.91802	4.46404e-05	0.000132634	-4.35027
REACTOME_G_ALPHA_Z_SIGNALLING_EVENTS	-1.8451	0.0325112	0.0526148	-1.48797	-3.4399	0.000290961	0.000974719	-3.53617	-4.94164	3.87345e-07	2.983e-06	-6.4119
REACTOME_G_ALPHA1213_SIGNALLING_EVENTS	-1.55997	0.059384	0.0841168	-1.22633	-3.89811	4.84728e-05	0.000219438	-4.3145	-5.18196	1.09781e-07	1.25716e-06	-6.95947
REACTOME_G_BETA_GAMMA_SIGNALLING_THROUGH_PI3KGAMMA	1.91368	0.0278307	0.0481824	1.55548	1.14537	0.126029	0.153806	0.89953	-2.9319	0.00168447	0.0031263	-2.77354
REACTOME_G_BETA_GAMMA_SIGNALLING_THROUGH_PLC_BETA	1.23114	0.109135	0.134023	0.962037	-2.14686	0.0159023	0.0281867	-1.79854	-3.74261	9.10595e-05	0.00024902	-4.04067
REACTOME_G_PROTEIN_ACTIVATION	0.727416	0.233486	0.2403	0.63174	0.836899	0.201325	0.224439	0.696103	-2.9378	0.00165274	0.00309311	-2.7818
REACTOME_G_PROTEIN_BETA_GAMMA_SIGNALLING	2.18115	0.0145863	0.02926	1.83605	0.70525	0.240327	0.2564	0.619197	-3.56181	0.000184155	0.000462112	-3.73482
REACTOME_G0_AND_EARLY_G1	0.815874	0.207286	0.219749	0.68343	5.1406	1.36928e-07	1.76426e-06	6.86351	5.32232	5.12258e-08	7.00434e-07	7.29051
REACTOME_G1_PHASE	1.3135	0.094507	0.119924	1.02454	4.09072	2.1502e-05	0.000111677	4.66752	4.45064	4.2807e-06	1.85037e-05	5.36849
REACTOME_G1_S_SPECIFIC_TRANSCRIPTION	0.671329	0.251006	0.255583	0.600317	5.7414	4.69493e-09	2.09707e-07	8.32837	5.44615	2.57362e-08	4.20567e-07	7.58946
REACTOME_G1_S_TRANSITION	3.35284	0.000399934	0.0015517	3.39801	5.97207	1.17129e-09	7.13425e-08	8.93133	5.7301	5.01859e-09	1.77162e-07	8.29942
REACTOME_G2_M_CHECKPOINTS	-2.09767	0.0179669	0.0345915	-1.74553	5.94826	1.35506e-09	7.56577e-08	8.86804	5.51658	1.72834e-08	3.30853e-07	7.76237
REACTOME_G2_M_DNA_DAMAGE_CHECKPOINT	1.10162	0.135313	0.157943	0.868662	4.25477	1.0463e-05	6.23757e-05	4.98034	4.60003	2.1122e-06	1.03297e-05	5.67526
REACTOME_GAB1_SIGNALOSOME	-2.53545	0.00561522	0.013294	-2.25063	0.627994	0.265004	0.275275	0.576748	-3.60688	0.000154952	0.000396251	-3.8098
REACTOME_GABA_A_RECEPTOR_ACTIVATION	1.31078	0.0949667	0.120052	1.02243	0.985261	0.162248	0.188726	0.789821	2.94972	0.00159033	0.00301848	2.79851
REACTOME_GABA_B_RECEPTOR_ACTIVATION	-1.89611	0.0289725	0.0487728	-1.53801	-2.42804	0.00759026	0.0150014	-2.11974	-3.65447	0.000128856	0.000338934	-3.8899
REACTOME_GABA_RECEPTOR_ACTIVATION	-1.53737	0.0621016	0.0870462	-1.2069	-2.50084	0.00619487	0.0127318	-2.20797	-2.60959	0.00453255	0.00746145	-2.34366
REACTOME_GABA_SYNTHESIS_RELEASE_REUPTAKE_AND_DEGRADATION	-2.26019	0.0119048	0.0247709	-1.92428	-3.14834	0.000821006	0.00234074	-3.08565	-1.29722	0.0972779	0.107022	-1.01199
REACTOME_GAMMA_CARBOXYLATION_TRANSPORT_AND_AMINO_TERMINAL_CLEAVAGE_OF_PROTEINS	1.88313	0.0298413	0.0494893	1.52518	0.725393	0.234105	0.251363	0.630588	1.48099	0.069305	0.0803363	1.15924
REACTOME_GAP_JUNCTION_ASSEMBLY	1.98707	0.0234573	0.0427075	1.62972	1.45969	0.0721882	0.094465	1.14153	2.07141	0.0191601	0.0263599	1.7176
REACTOME_GAP_JUNCTION_DEGRADATION	0.753844	0.225471	0.233848	0.646909	-1.55997	0.059384	0.0810331	-1.22633	-3.72837	9.63608e-05	0.000260329	-4.0161
REACTOME_GAP_JUNCTION_TRAFFICKING	1.2678	0.102434	0.126625	0.989557	0.93394	0.175167	0.200277	0.756547	-2.29256	0.0109368	0.0160342	-1.96111
REACTOME_GASTRIN_CREB_SIGNALLING_PATHWAY_VIA_PKC_AND_MAPK	1.20801	0.113522	0.13779	0.944918	-3.96975	3.59748e-05	0.000164247	-4.444	-4.71446	1.21176e-06	7.2272e-06	-5.91658
REACTOME_GENERATION_OF_SECOND_MESSENGER_MOLECULES	3.59862	0.000159956	0.000762593	3.796	2.68092	0.00367098	0.00833749	2.43522	-3.8954	4.90186e-05	0.000142793	-4.30964
REACTOME_GENERIC_TRANSCRIPTION_PATHWAY	0.298195	0.382777	0.382777	0.417054	4.92293	4.26288e-07	4.31084e-06	6.3703	5.03692	2.36537e-07	2.17096e-06	6.6261
REACTOME_GLOBAL_GENOMIC_NER_GG_NER	0.635828	0.262444	0.265215	0.580963	4.78237	8.66206e-07	7.73811e-06	6.06238	4.54395	2.76046e-06	1.29336e-05	5.55902
REACTOME_GLUCAGON_SIGNALING_IN_METABOLIC_REGULATION	-2.53545	0.00561522	0.013294	-2.25063	-3.88595	5.09653e-05	0.000220302	-4.29273	-4.60385	2.07379e-06	1.02165e-05	-5.68324
REACTOME_GLUCAGON_TYPE_LIGAND_RECEPTORS	1.16019	0.122985	0.146881	0.910146	-1.74591	0.0404133	0.0599047	-1.39348	-2.98167	0.00143341	0.00279181	-2.84363
REACTOME_GLUCONEOGENESIS	-1.83272	0.0334221	0.0536998	-1.47597	1.33826	0.0904062	0.113644	1.0438	1.28914	0.0986744	0.10838	1.0058
REACTOME_GLUCOSE_METABOLISM	1.19023	0.116978	0.140962	0.931897	0.653527	0.256708	0.269584	0.59056	1.28378	0.0996095	0.109228	1.0017
REACTOME_GLUCOSE_TRANSPORT	-1.48406	0.0688968	0.094014	-1.1618	3.06779	0.00107823	0.00293664	2.96729	4.04726	2.59108e-05	8.15035e-05	4.58652
REACTOME_GLUCURONIDATION	0.976244	0.164472	0.183967	0.783909	0.99205	0.160586	0.187118	0.794291	1.70121	0.0444516	0.0550509	1.35211
REACTOME_GLUTAMATE_NEUROTRANSMITTER_RELEASE_CYCLE	-3.94492	3.9913e-05	0.000270118	-4.39889	-3.11283	0.000926505	0.00258649	-3.03315	-3.434	0.00029737	0.000719269	-3.5267
REACTOME_GLUTATHIONE_CONJUGATION	1.46877	0.070947	0.0958357	1.14907	-2.51796	0.00590189	0.0123186	-2.22901	-0.978495	0.163915	0.165396	-0.785382
REACTOME_GLYCEROPHOSPHOLIPID_BIOSYNTHESIS	1.81239	0.0349632	0.0556421	1.45639	-4.07034	2.34728e-05	0.000114794	-4.62944	-3.46846	0.000261723	0.000642323	-3.58216
REACTOME_GLYCOGEN_BREAKDOWN_GLYCOGENOLYSIS	1.10643	0.13427	0.15755	0.872021	-1.9729	0.0242534	0.0397304	-1.61523	-1.92257	0.027267	0.0358917	-1.56436
REACTOME_GLYCOLYSIS	1.90486	0.0283992	0.0486636	1.54669	0.612383	0.270142	0.279314	0.568408	2.10301	0.0177322	0.0248029	1.75124
REACTOME_GLYCOPROTEIN_HORMONES	1.95893	0.0250606	0.0448946	1.60101	0.97175	0.165587	0.191944	0.780973	1.72708	0.042077	0.0524983	1.37596
REACTOME_GLYCOSAMINOGLYCAN_METABOLISM	3.88634	5.08829e-05	0.000314434	4.29343	-2.9655	0.00151094	0.00398555	-2.82075	-4.17775	1.47204e-05	5.03198e-05	-4.83208
REACTOME_GLYCOSPHINGOLIPID_METABOLISM	2.09236	0.018203	0.0349455	1.73986	-2.31257	0.0103731	0.0195775	-1.98409	-2.08708	0.0184403	0.0255797	-1.73423
REACTOME_GOLGI_ASSOCIATED_VESICLE_BIOGENESIS	3.02633	0.00123772	0.00400614	2.90738	0.391332	0.347776	0.349865	0.458701	-1.94972	0.0256049	0.0339708	-1.59168
REACTOME_GPCR_DOWNSTREAM_SIGNALING	3.38382	0.000357419	0.00141699	3.44682	-3.88595	5.09653e-05	0.000220302	-4.29273	-5.13409	1.41755e-07	1.48399e-06	-6.84846
REACTOME_GPCR_LIGAND_BINDING	5.26428	7.0369e-08	4.35149e-06	7.15262	1.8703	0.0307208	0.0478672	1.51257	-2.77181	0.0027873	0.00478844	-2.55482
REACTOME_GPVI_MEDIATED_ACTIVATION_CASCADE	2.68092	0.00367098	0.00953318	2.43522	-1.98233	0.0237214	0.0389542	-1.62486	-4.71155	1.22922e-06	7.2272e-06	-5.91037
REACTOME_GRB2_EVENTS_IN_ERBB2_SIGNALING	1.66168	0.0482883	0.072056	1.31616	1.70121	0.0444516	0.0647447	1.35211	-1.44467	0.0742751	0.0850672	-1.12916
REACTOME_GRB2_SOS_PROVIDES_LINKAGE_TO_MAPK_SIGNALING_FOR_INTERGRINS_	3.12522	0.000888371	0.002991	3.05141	0.539203	0.294873	0.301167	0.530364	-1.88313	0.0298413	0.0385235	-1.52518
REACTOME_GROWTH_HORMONE_RECEPTOR_SIGNALING	3.70246	0.00010676	0.000558823	3.97159	1.11851	0.131675	0.158673	0.880496	-3.77469	8.01021e-05	0.000224554	-4.09636
REACTOME_HDL_MEDIATED_LIPID_TRANSPORT	2.87184	0.00204046	0.00604914	2.69027	-1.78454	0.0371683	0.0560873	-1.42983	-2.46768	0.0067996	0.0107194	-2.16752
REACTOME_HEMOSTASIS	4.69654	1.323e-06	2.77003e-05	5.87844	0.325436	0.372426	0.372982	0.428961	-5.14324	1.35019e-07	1.43592e-06	-6.86961
REACTOME_HEPARAN_SULFATE_HEPARIN_HS_GAG_METABOLISM	2.06111	0.0196465	0.037184	1.70672	-2.61938	0.00440452	0.00964387	-2.3561	-2.78401	0.00268458	0.00465976	-2.57112
REACTOME_HIGHLY_CALCIUM_PERMEABLE_POSTSYNAPTIC_NICOTINIC_ACETYLCHOLINE_RECEPTORS	-2.43582	0.00742907	0.0168728	-2.12907	-1.59296	0.0555849	0.0767873	-1.25504	1.15771	0.123491	0.130916	0.908365
REACTOME_HIV_INFECTION	3.9694	3.60276e-05	0.000253493	4.44336	5.29165	6.06103e-08	9.4041e-07	7.21745	5.19263	1.03675e-07	1.25716e-06	6.98433
REACTOME_HIV_LIFE_CYCLE	0.600724	0.274012	0.276488	0.562231	5.00489	2.79469e-07	3.02007e-06	6.55367	5.17277	1.15323e-07	1.25716e-06	6.93809
REACTOME_HOMOLOGOUS_RECOMBINATION_REPAIR_OF_REPLICATION_INDEPENDENT_DOUBLE_STRAND_BREAKS	-2.86207	0.00210444	0.00615921	-2.67686	2.75981	0.00289176	0.00679817	2.53884	3.84427	6.04562e-05	0.000173101	4.21856
REACTOME_HORMONE_LIGAND_BINDING_RECEPTORS	1.56977	0.0582339	0.0830142	1.23482	0.786739	0.215717	0.235776	0.666115	1.26516	0.102907	0.11211	0.987554
REACTOME_HORMONE_SENSITIVE_LIPASE_HSL_MEDIATED_TRIACYLGLYCEROL_HYDROLYSIS	1.80436	0.0355876	0.0561027	1.4487	1.61999	0.0526173	0.0737523	1.27887	-1.63373	0.0511579	0.0617582	-1.29109
REACTOME_HOST_INTERACTIONS_OF_HIV_FACTORS	4.82429	7.02524e-07	1.68104e-05	6.15334	5.28704	6.21541e-08	9.4041e-07	7.20653	3.16001	0.000788815	0.00170486	3.10303
REACTOME_HS_GAG_BIOSYNTHESIS	1.04722	0.1475	0.170094	0.831209	-3.694	0.000110376	0.000425011	-3.95713	-3.10703	0.000944876	0.00197217	-3.02463
REACTOME_HS_GAG_DEGRADATION	3.68444	0.000114601	0.000586129	3.94081	-1.59966	0.0548369	0.0760678	-1.26093	-2.9655	0.00151094	0.00289237	-2.82075
REACTOME_HYALURONAN_METABOLISM	2.89633	0.00188775	0.00574906	2.72406	1.33826	0.0904062	0.113644	1.0438	-1.76893	0.038453	0.0482463	-1.41507
REACTOME_HYALURONAN_UPTAKE_AND_DEGRADATION	3.08834	0.00100641	0.00335468	2.99723	1.63719	0.0507956	0.071498	1.29417	-2.25385	0.0121027	0.0175516	-1.91712
REACTOME_IKK_COMPLEX_RECRUITMENT_MEDIATED_BY_RIP1	4.14353	1.71003e-05	0.00013479	4.767	0.832679	0.202513	0.224929	0.693548	-2.83501	0.00229122	0.00407192	-2.63993
REACTOME_IL_2_SIGNALING	1.50888	0.065665	0.0912771	1.18267	1.10403	0.134791	0.161556	0.870339	-4.0236	2.86579e-05	8.8077e-05	-4.54276
REACTOME_IL_3_5_AND_GM_CSF_SIGNALING	1.31623	0.094048	0.119795	1.02665	-2.05091	0.020138	0.0340719	-1.69598	-4.69994	1.30118e-06	7.32597e-06	-5.88566
REACTOME_IL_6_SIGNALING	2.64952	0.00403028	0.0102672	2.39466	-2.34699	0.0094628	0.0182186	-2.02398	-4.62066	1.91263e-06	9.49231e-06	-5.71837
REACTOME_IL_7_SIGNALING	-1.32171	0.0931326	0.119082	-1.0309	-1.58297	0.0567142	0.0781862	-1.24631	-4.0277	2.81624e-05	8.6953e-05	-4.55033
REACTOME_IL_RECEPTOR_SHC_SIGNALING	0.862375	0.194241	0.210584	0.71166	0.647616	0.258617	0.270739	0.587344	-4.51336	3.1905e-06	1.45417e-05	-5.49614
REACTOME_IL1_SIGNALING	2.43582	0.00742907	0.0168728	2.12907	0.707258	0.239703	0.256142	0.620326	-4.04092	2.66204e-05	8.33444e-05	-4.57478
REACTOME_IMMUNE_SYSTEM	7.16545	3.8769e-13	2.59752e-10	12.4115	5.09174	1.77399e-07	2.08521e-06	6.75105	-5.61937	9.58247e-09	2.46933e-07	-8.01852
REACTOME_IMMUNOREGULATORY_INTERACTIONS_BETWEEN_A_LYMPHOID_AND_A_NON_LYMPHOID_CELL	5.05852	2.11265e-07	8.32632e-06	6.67517	4.01221	3.00759e-05	0.000142914	4.52178	-4.83172	6.76777e-07	4.6056e-06	-6.16955
REACTOME_INCRETIN_SYNTHESIS_SECRETION_AND_INACTIVATION	1.90486	0.0283992	0.0486636	1.54669	1.78061	0.0374878	0.0561898	1.42611	1.60303	0.0544645	0.0648156	1.26389
REACTOME_INFLAMMASOMES	3.74256	9.10759e-05	0.000504305	4.0406	-1.43278	0.0759609	0.0986314	-1.11941	-3.47413	0.000256253	0.000631211	-3.59133
REACTOME_INFLUENZA_LIFE_CYCLE	3.08198	0.00102813	0.00341015	2.98795	5.03257	2.41979e-07	2.7021e-06	6.61622	5.45379	2.46537e-08	4.1295e-07	7.60812
REACTOME_INFLUENZA_VIRAL_RNA_TRANSCRIPTION_AND_REPLICATION	2.95712	0.00155262	0.00483841	2.80893	4.21658	1.2402e-05	7.10199e-05	4.90651	4.98835	3.0449e-07	2.46149e-06	6.51643
REACTOME_INHIBITION_OF_INSULIN_SECRETION_BY_ADRENALINE_NORADRENALINE	-1.86184	0.0313129	0.0511699	-1.50428	-2.65984	0.00390884	0.00875895	-2.40795	-4.13109	1.80522e-05	5.9876e-05	-4.74347
REACTOME_INHIBITION_OF_REPLICATION_INITIATION_OF_DAMAGED_DNA_BY_RB1_E2F1	-1.79242	0.0365326	0.0570556	-1.43732	3.36199	0.000386911	0.00122858	3.41239	4.52742	2.98536e-06	1.37944e-05	5.525
REACTOME_INHIBITION_OF_THE_PROTEOLYTIC_ACTIVITY_OF_APC_C_REQUIRED_FOR_THE_ONSET_OF_ANAPHASE_BY_MITOTIC_SPINDLE_CHECKPOINT_COMPONENTS	0.929536	0.176306	0.195895	0.753734	4.76907	9.25392e-07	8.06754e-06	6.03367	4.70979	1.23986e-06	7.2272e-06	5.90663
REACTOME_INHIBITION_OF_VOLTAGE_GATED_CA2_CHANNELS_VIA_GBETA_GAMMA_SUBUNITS	0.998863	0.158931	0.178664	0.798792	0.801264	0.211489	0.231911	0.674711	-2.75981	0.00289176	0.00495518	-2.53884
REACTOME_INITIAL_TRIGGERING_OF_COMPLEMENT	5.0773	1.91416e-07	8.01555e-06	6.71802	1.82048	0.0343433	0.0524146	1.46416	-1.86606	0.0310163	0.0399633	-1.50841
REACTOME_INNATE_IMMUNE_SYSTEM	5.8704	2.17377e-09	6.29362e-07	8.66279	3.391	0.000348188	0.0011162	3.45819	-4.68342	1.4106e-06	7.59083e-06	-5.85059
REACTOME_INSULIN_RECEPTOR_RECYCLING	2.10839	0.0174988	0.0340821	1.75699	1.10643	0.13427	0.16151	0.872021	-1.99184	0.0231944	0.0310805	-1.63462
REACTOME_INSULIN_RECEPTOR_SIGNALLING_CASCADE	0.851727	0.197183	0.212742	0.705131	1.02174	0.153452	0.180373	0.814027	-0.996589	0.159482	0.16239	-0.797289
REACTOME_INSULIN_SYNTHESIS_AND_PROCESSING	-3.26398	0.000549289	0.00201106	-3.2602	-2.41271	0.00791721	0.0154651	-2.10143	-4.30241	8.44751e-06	3.19764e-05	-5.07327
REACTOME_INTEGRATION_OF_ENERGY_METABOLISM	-2.38287	0.00858922	0.0190556	-2.06605	-3.96975	3.59748e-05	0.000164247	-4.444	-4.84456	6.34447e-07	4.38226e-06	-6.1976
REACTOME_INTEGRATION_OF_PROVIRUS	2.10839	0.0174988	0.0340821	1.75699	2.82226	0.00238432	0.00583661	2.62263	3.03315	0.00121008	0.00243869	2.91719
REACTOME_INTEGRIN_ALPHAIIB_BETA3_SIGNALING	1.8703	0.0307208	0.0505723	1.51257	0.52019	0.301466	0.307431	0.520762	-3.09013	0.00100034	0.00206861	-2.99985
REACTOME_INTEGRIN_CELL_SURFACE_INTERACTIONS	4.32077	7.77421e-06	7.50701e-05	5.10934	-4.65351	1.63168e-06	1.21469e-05	-5.78737	-5.02935	2.46077e-07	2.21184e-06	-6.60893
REACTOME_INTERACTION_BETWEEN_L1_AND_ANKYRINS	-5.25475	7.41121e-08	4.35149e-06	-7.13011	-5.35991	4.16327e-08	7.55915e-07	-7.38057	-5.08717	1.81723e-07	1.83385e-06	-6.74059
REACTOME_INTERACTIONS_OF_VPR_WITH_HOST_CELLULAR_PROTEINS	-1.61318	0.0533532	0.0778794	-1.27284	4.0763	2.28788e-05	0.000114794	4.64057	4.24261	1.10466e-05	3.91599e-05	4.95677
REACTOME_INTERFERON_ALPHA_BETA_SIGNALING	5.66726	7.25497e-09	1.21521e-06	8.13936	1.91811	0.0275482	0.0438416	1.55991	-4.2728	9.65151e-06	3.59251e-05	-5.0154
REACTOME_INTERFERON_GAMMA_SIGNALING	4.87013	5.5763e-07	1.49445e-05	6.25365	0.48432	0.314079	0.317875	0.502961	-5.3137	5.37118e-08	7.19738e-07	-7.26993
REACTOME_INTERFERON_SIGNALING	5.55047	1.42449e-08	1.36344e-06	7.84634	2.60959	0.00453255	0.00985977	2.34366	-3.44774	0.000282648	0.000688634	-3.54875
REACTOME_INTRINSIC_PATHWAY	3.85841	5.70644e-05	0.000341368	4.24363	0.866648	0.193067	0.217404	0.714291	1.01485	0.155089	0.159371	0.809419
REACTOME_INTRINSIC_PATHWAY_FOR_APOPTOSIS	0.745685	0.227929	0.236031	0.642201	0.591039	0.277247	0.284901	0.557133	1.18016	0.118968	0.126723	0.924568
REACTOME_INWARDLY_RECTIFYING_K_CHANNELS	1.16516	0.121977	0.145937	0.913723	0.830572	0.203108	0.224929	0.692274	-2.45159	0.00711126	0.0110546	-2.14805
REACTOME_ION_CHANNEL_TRANSPORT	1.27577	0.101018	0.125337	0.995601	-2.70261	0.00343984	0.00786586	-2.46346	1.4122	0.0789455	0.0894983	1.10267
REACTOME_ION_TRANSPORT_BY_P_TYPE_ATPASES	1.49331	0.0676779	0.0933008	1.16955	-1.93606	0.0264305	0.0425683	-1.57789	-1.62341	0.0522509	0.0627386	-1.28191
REACTOME_IONOTROPIC_ACTIVITY_OF_KAINATE_RECEPTORS	-2.82878	0.00233632	0.00663278	-2.63147	-2.50935	0.00604759	0.0125835	-2.21842	-2.54434	0.00547427	0.00881673	-2.26167
REACTOME_IRAK1_RECRUITS_IKK_COMPLEX	1.30534	0.0958888	0.12099	1.01823	1.25461	0.104809	0.129801	0.9796	1.06832	0.142689	0.148219	0.845611
REACTOME_IRAK2_MEDIATED_ACTIVATION_OF_TAK1_COMPLEX_UPON_TLR7_8_OR_9_STIMULATION	1.74591	0.0404133	0.0611217	1.39348	2.50084	0.00619487	0.0127318	2.20797	1.66522	0.0479342	0.0588204	1.31935
REACTOME_IRON_UPTAKE_AND_TRANSPORT	3.88883	5.03649e-05	0.000314434	4.29787	0.824262	0.204895	0.226534	0.688468	-2.74801	0.00299794	0.00508512	-2.52318
REACTOME_JNK_C_JUN_KINASES_PHOSPHORYLATION_AND_ACTIVATION_MEDIATED_BY_ACTIVATED_HUMAN_TAK1	1.14537	0.126029	0.14945	0.89953	1.34939	0.0886053	0.112435	1.05254	-1.91368	0.0278307	0.0364904	-1.55548
REACTOME_KERATAN_SULFATE_BIOSYNTHESIS	1.9776	0.0239867	0.0434355	1.62003	-2.41271	0.00791721	0.0154651	-2.10143	-3.23196	0.000614727	0.00137748	-3.21132
REACTOME_KERATAN_SULFATE_DEGRADATION	3.96746	3.63214e-05	0.000253493	4.43984	-1.37476	0.084603	0.107764	-1.07261	-2.52665	0.00575776	0.009185	-2.23975
REACTOME_KERATAN_SULFATE_KERATIN_METABOLISM	2.42804	0.00759026	0.0171228	2.11974	-2.29918	0.0107475	0.020227	-1.96869	-3.73248	9.48021e-05	0.000257156	-4.02318
REACTOME_KINESINS	-3.6672	0.000122609	0.000622331	-3.91148	4.28967	8.94714e-06	5.44962e-05	5.04832	3.09933	0.000969806	0.00201167	3.01332
REACTOME_L1CAM_INTERACTIONS	-2.78036	0.00271495	0.00751661	-2.56624	-3.46952	0.000260699	0.000895735	-3.58386	-4.72752	1.13641e-06	6.93749e-06	-5.94447
REACTOME_LAGGING_STRAND_SYNTHESIS	1.09683	0.136358	0.158887	0.865319	5.23618	8.1969e-08	1.16849e-06	7.08635	5.18976	1.05283e-07	1.25716e-06	6.97764
REACTOME_LATE_PHASE_OF_HIV_LIFE_CYCLE	-2.02586	0.0213893	0.0394789	-1.6698	4.73268	1.10788e-06	9.16393e-06	5.95551	4.99628	2.92238e-07	2.41728e-06	6.53426
REACTOME_LATENT_INFECTION_OF_HOMO_SAPIENS_WITH_MYCOBACTERIUM_TUBERCULOSIS	4.17575	1.48501e-05	0.000121336	4.82827	1.68308	0.0461797	0.0666819	1.33555	-1.90486	0.0283992	0.0369465	-1.54669
REACTOME_LIGAND_GATED_ION_CHANNEL_TRANSPORT	0.801264	0.211489	0.223498	0.674711	-2.7137	0.00332681	0.00768608	-2.47797	2.58095	0.00492645	0.00803095	2.30747
REACTOME_LIPID_DIGESTION_MOBILIZATION_AND_TRANSPORT	3.63616	0.000138365	0.000681542	3.85897	0.721353	0.235346	0.252291	0.628293	-2.45159	0.00711126	0.0110546	-2.14805
REACTOME_LIPOPROTEIN_METABOLISM	3.62825	0.000142674	0.000692691	3.84566	-2.42034	0.00775298	0.0152779	-2.11053	-2.07661	0.0189189	0.0261353	-1.7231
REACTOME_LOSS_OF_NLP_FROM_MITOTIC_CENTROSOMES	-4.85398	6.05027e-07	1.51704e-05	-6.21822	1.53417	0.0624937	0.0837416	1.20416	1.67591	0.0468784	0.0576303	1.32903
REACTOME_LYSOSOME_VESICLE_BIOGENESIS	2.51796	0.00590189	0.0139235	2.22901	0.958328	0.168949	0.195502	0.772245	-2.83501	0.00229122	0.00407192	-2.63993
REACTOME_M_G1_TRANSITION	4.38997	5.66823e-06	5.83461e-05	5.24655	6.05809	6.88721e-10	5.56992e-08	9.16196	5.53948	1.51689e-08	3.17598e-07	7.81905
REACTOME_MAP_KINASE_ACTIVATION_IN_TLR_CASCADE	1.7612	0.039102	0.0599505	1.4078	1.5278	0.0632808	0.0842906	1.19873	-1.73834	0.0410755	0.0513444	-1.38642
REACTOME_MAPK_TARGETS_NUCLEAR_EVENTS_MEDIATED_BY_MAP_KINASES	1.0754	0.141097	0.163839	0.850483	0.645648	0.259254	0.270983	0.586275	-2.45159	0.00711126	0.0110546	-2.14805
REACTOME_MEIOSIS	-1.7612	0.039102	0.0599505	-1.4078	5.09544	1.73967e-07	2.0814e-06	6.75953	5.75074	4.44277e-09	1.75097e-07	8.35235
REACTOME_MEIOTIC_RECOMBINATION	0.647616	0.258617	0.262138	0.587344	5.59928	1.0762e-08	3.00438e-07	7.96811	5.90135	1.8027e-09	1.00651e-07	8.74408
REACTOME_MEIOTIC_SYNAPSIS	0.739581	0.229777	0.237578	0.638693	4.89432	4.93238e-07	4.721e-06	6.30694	4.68143	1.42442e-06	7.59083e-06	5.84636
REACTOME_MEMBRANE_BINDING_AND_TARGETTING_OF_GAG_PROTEINS	1.11367	0.132711	0.156268	0.877093	1.03097	0.151278	0.178759	0.820223	1.80436	0.0355876	0.0450731	1.4487
REACTOME_MEMBRANE_TRAFFICKING	4.08208	2.23168e-05	0.000168003	4.65137	1.57635	0.0574721	0.0787449	1.24054	-2.86658	0.00207464	0.00375678	-2.68306
REACTOME_METABOLISM_OF_AMINO_ACIDS_AND_DERIVATIVES	4.21419	1.25337e-05	0.000110494	4.90192	3.20857	0.00066699	0.00199501	3.17588	4.88274	5.2311e-07	3.72855e-06	6.28141
REACTOME_METABOLISM_OF_CARBOHYDRATES	3.55168	0.00019139	0.00087232	3.71808	1.07777	0.140568	0.167283	0.852115	0.998863	0.158931	0.162075	0.798792
REACTOME_METABOLISM_OF_LIPIDS_AND_LIPOPROTEINS	2.63934	0.00415337	0.0104615	2.3816	-4.65351	1.63168e-06	1.21469e-05	-5.78737	-5.17114	1.16334e-07	1.25716e-06	-6.93429
REACTOME_METABOLISM_OF_MRNA	4.41213	5.11793e-06	5.53067e-05	5.29091	5.46555	2.30737e-08	4.83105e-07	7.63688	5.33971	4.65488e-08	6.49744e-07	7.33209
REACTOME_METABOLISM_OF_NON_CODING_RNA	-1.46271	0.0717735	0.0965628	-1.14404	4.52649	2.99852e-06	2.07114e-05	5.52309	5.10427	1.66039e-07	1.71148e-06	6.77979
REACTOME_METABOLISM_OF_NUCLEOTIDES	1.89177	0.0292609	0.0488898	1.53371	3.07461	0.00105391	0.00289392	2.9772	4.05877	2.4666e-05	7.83234e-05	4.6079
REACTOME_METABOLISM_OF_POLYAMINES	3.35074	0.000402979	0.0015517	3.39472	2.47584	0.00664608	0.0135758	2.17743	2.16957	0.0150196	0.0213654	1.82334
REACTOME_METABOLISM_OF_PORPHYRINS	1.80037	0.0359015	0.0563325	1.44489	-1.79639	0.0362165	0.0548983	-1.44109	-1.33826	0.0904062	0.100119	-1.0438
REACTOME_METABOLISM_OF_PROTEINS	4.43793	4.54146e-06	5.24338e-05	5.3428	4.58645	2.25421e-06	1.624e-05	5.64701	6.16177	3.59677e-10	3.44262e-08	9.44409
REACTOME_METABOLISM_OF_RNA	4.58326	2.28895e-06	3.56651e-05	5.64036	5.68351	6.59773e-09	2.60028e-07	8.18061	5.702	5.92032e-09	1.84624e-07	8.22765
REACTOME_METABOLISM_OF_STEROID_HORMONES_AND_VITAMINS_A_AND_D	1.12579	0.130127	0.154037	0.885633	-1.94972	0.0256049	0.0414378	-1.59168	-1.27577	0.101018	0.110592	-0.995601
REACTOME_METABOLISM_OF_VITAMINS_AND_COFACTORS	2.74801	0.00299794	0.00826594	2.52318	1.79242	0.0365326	0.0552525	1.43732	2.01602	0.0218987	0.029581	1.65958
REACTOME_METAL_ION_SLC_TRANSPORTERS	4.05511	2.50557e-05	0.000184476	4.60109	1.47792	0.0697141	0.0917652	1.15668	1.42392	0.0772347	0.0877071	1.11219
REACTOME_MHC_CLASS_II_ANTIGEN_PRESENTATION	2.78401	0.00268458	0.00746335	2.57112	3.1884	0.000715311	0.00212036	3.14551	-1.98233	0.0237214	0.03166	-1.62486
REACTOME_MICRORNA_MIRNA_BIOGENESIS	-2.86196	0.00210516	0.00615921	-2.67671	1.82454	0.0340351	0.0523016	1.46807	1.25724	0.104333	0.113295	0.98158
REACTOME_MITOCHONDRIAL_FATTY_ACID_BETA_OXIDATION	-2.7137	0.00332681	0.00891586	-2.47797	-3.55271	0.000190643	0.00067942	-3.71978	-1.25724	0.104333	0.113295	-0.98158
REACTOME_MITOCHONDRIAL_PROTEIN_IMPORT	1.40058	0.0806706	0.106396	1.09328	3.43002	0.000301765	0.00100588	3.52033	4.96257	3.47825e-07	2.74168e-06	6.45864
REACTOME_MITOCHONDRIAL_TRNA_AMINOACYLATION	-1.45667	0.0726037	0.097484	-1.13904	1.09683	0.136358	0.163143	0.865319	4.76527	9.43015e-07	6.13418e-06	6.02548
REACTOME_MITOTIC_G1_G1_S_PHASES	3.48402	0.000246976	0.00106073	3.60735	6.35022	1.07501e-10	1.80064e-08	9.96859	6.47861	4.6287e-11	7.75307e-09	10.3345
REACTOME_MITOTIC_G2_G2_M_PHASES	-3.90111	4.78767e-05	0.000308436	-4.31988	4.20905	1.28225e-05	7.28056e-05	4.89203	4.32417	7.65519e-06	2.96473e-05	5.11604
REACTOME_MITOTIC_M_M_G1_PHASES	2.33306	0.00982255	0.0212294	2.00778	6.0463	7.41054e-10	5.56992e-08	9.13015	6.52727	3.34892e-11	7.47926e-09	10.4751
REACTOME_MITOTIC_PROMETAPHASE	-3.37531	0.000368657	0.00144445	-3.43338	5.36865	3.96641e-08	7.55915e-07	7.4016	6.07788	6.08909e-10	4.53299e-08	9.21545
REACTOME_MRNA_3_END_PROCESSING	-2.11922	0.017036	0.0333747	-1.76863	4.36901	6.24056e-06	3.98207e-05	5.20478	3.82617	6.50763e-05	0.000185537	4.18658
REACTOME_MRNA_CAPPING	-1.31078	0.0949667	0.120052	-1.02243	1.84926	0.0322099	0.0498398	1.49201	3.22705	0.000625377	0.00139479	3.20386
REACTOME_MRNA_DECAY_BY_3_TO_5_EXORIBONUCLEASE	1.80837	0.0352748	0.0558726	1.45254	3.89616	4.88657e-05	0.000219731	4.311	4.71361	1.21685e-06	7.2272e-06	5.91476
REACTOME_MRNA_DECAY_BY_5_TO_3_EXORIBONUCLEASE	0.828467	0.203703	0.218021	0.691003	2.90583	0.00183142	0.00477451	2.73721	3.38177	0.000360104	0.000849541	3.44357
REACTOME_MRNA_PROCESSING	-3.75059	8.82084e-05	0.000492497	-4.05449	4.84929	6.19517e-07	5.68598e-06	6.20795	6.12649	4.49188e-10	3.76195e-08	9.34757
REACTOME_MRNA_SPLICING	-3.26398	0.000549289	0.00201106	-3.2602	5.22775	8.57915e-08	1.19751e-06	7.06656	5.46352	2.33395e-08	4.11513e-07	7.63191
REACTOME_MRNA_SPLICING_MINOR_PATHWAY	-2.70261	0.00343984	0.00907361	-2.46346	3.76807	8.22586e-05	0.000329232	4.08482	4.74282	1.05381e-06	6.59859e-06	5.97724
REACTOME_MTORC1_MEDIATED_SIGNALLING	1.02865	0.151821	0.17388	0.818668	2.26657	0.0117084	0.0216702	1.9315	2.56243	0.00519715	0.00843121	2.28423
REACTOME_MUSCLE_CONTRACTION	3.55518	0.000188861	0.000866692	3.72386	-3.12756	0.000881324	0.00247066	-3.05486	-3.3158	0.000456914	0.00105928	-3.34017
REACTOME_MYD88_MAL_CASCADE_INITIATED_ON_PLASMA_MEMBRANE	3.57878	0.000172603	0.000803085	3.76295	1.73834	0.0410755	0.0607519	1.38642	-2.42034	0.00775298	0.0118867	-2.11053
REACTOME_MYOGENESIS	-2.58095	0.00492645	0.0120026	-2.30747	-1.54378	0.0613203	0.0831672	-1.2124	-1.6903	0.0454853	0.0561236	-1.34213
REACTOME_N_GLYCAN_ANTENNAE_ELONGATION	-3.05056	0.00114207	0.00373262	-2.94231	-3.4751	0.000255336	0.000881831	-3.59289	-2.79642	0.0025836	0.00449614	-2.58777
REACTOME_N_GLYCAN_ANTENNAE_ELONGATION_IN_THE_MEDIAL_TRANS_GOLGI	-2.04585	0.0203857	0.0379401	-1.69067	-2.4596	0.00695466	0.013951	-2.15772	-2.27946	0.0113197	0.0165233	-1.94616
REACTOME_N_GLYCAN_TRIMMING_IN_THE_ER_AND_CALNEXIN_CALRETICULIN_CYCLE	2.06625	0.0194026	0.0369312	1.71214	2.22284	0.0131132	0.0236816	1.88229	1.23893	0.107686	0.11637	0.967841
REACTOME_NA_CL_DEPENDENT_NEUROTRANSMITTER_TRANSPORTERS	-1.74971	0.0400838	0.0608984	-1.39703	-1.67591	0.0468784	0.0675452	-1.32903	-1.43574	0.0755381	0.0862189	-1.12183
REACTOME_NCAM_SIGNALING_FOR_NEURITE_OUT_GROWTH	-2.82191	0.00238691	0.00674781	-2.62216	-3.88595	5.09653e-05	0.000220302	-4.29273	-3.23798	0.000601894	0.00135325	-3.22048
REACTOME_NCAM1_INTERACTIONS	-1.55671	0.0597693	0.084484	-1.22352	-3.21512	0.000651945	0.00195876	-3.18579	-2.77181	0.0027873	0.00478844	-2.55482
REACTOME_NEF_MEDIATED_DOWNREGULATION_OF_MHC_CLASS_I_COMPLEX_CELL_SURFACE_EXPRESSION	2.78401	0.00268458	0.00746335	2.57112	1.66877	0.0475812	0.0676845	1.32256	-2.03082	0.0211365	0.0287835	-1.67497
REACTOME_NEF_MEDIATES_DOWN_MODULATION_OF_CELL_SURFACE_RECEPTORS_BY_RECRUITING_THEM_TO_CLATHRIN_ADAPTERS	3.25572	0.000565522	0.00204811	3.24755	2.55333	0.00533491	0.0113473	2.27287	-3.05056	0.00114207	0.0023258	-2.94231
REACTOME_NEGATIVE_REGULATION_OF_FGFR_SIGNALING	3.02026	0.00126279	0.00406765	2.89867	2.53545	0.00561522	0.0118681	2.25063	1.94059	0.0261541	0.0344945	1.58246
REACTOME_NEGATIVE_REGULATION_OF_THE_PI3K_AKT_NETWORK	0.782604	0.21693	0.228168	0.663681	1.59966	0.0548369	0.0760678	1.26093	-1.10403	0.134791	0.140889	-0.870339
REACTOME_NEGATIVE_REGULATORS_OF_RIG_I_MDA5_SIGNALING	3.92362	4.36146e-05	0.000289325	4.36037	1.78061	0.0374878	0.0561898	1.42611	-2.55333	0.00533491	0.00861298	-2.27287
REACTOME_NEP_NS2_INTERACTS_WITH_THE_CELLULAR_EXPORT_MACHINERY	-2.20474	0.0137363	0.0278888	-1.86213	4.18036	1.45522e-05	7.88601e-05	4.83707	4.29841	8.60132e-06	3.23758e-05	5.06543
REACTOME_NEPHRIN_INTERACTIONS	-1.81239	0.0349632	0.0556421	-1.45639	-3.15941	0.000790436	0.00226321	-3.10213	-4.52478	3.02298e-06	1.38726e-05	-5.51956
REACTOME_NETRIN1_SIGNALING	-3.25305	0.000570862	0.00205633	-3.24347	-4.33579	7.26181e-06	4.50501e-05	-5.13896	-4.27062	9.74647e-06	3.60781e-05	-5.01115
REACTOME_NEURONAL_SYSTEM	-4.43436	4.6173e-06	5.24338e-05	-5.33561	-3.88715	5.07139e-05	0.000220302	-4.29487	-5.39921	3.3467e-08	4.98919e-07	-7.47538
REACTOME_NEUROTRANSMITTER_RECEPTOR_BINDING_AND_DOWNSTREAM_TRANSMISSION_IN_THE_POSTSYNAPTIC_CELL	-4.65351	1.63168e-06	2.87691e-05	-5.78737	-4.37025	6.20526e-06	3.98207e-05	-5.20724	-5.02586	2.50585e-07	2.21184e-06	-6.60105
REACTOME_NEUROTRANSMITTER_RELEASE_CYCLE	-3.34549	0.000410688	0.00157235	-3.38649	-4.07034	2.34728e-05	0.000114794	-4.62944	-2.50935	0.00604759	0.00960163	-2.21842
REACTOME_NFKB_ACTIVATION_THROUGH_FADD_RIP1_PATHWAY_MEDIATED_BY_CASPASE_8_AND10	3.07249	0.0010614	0.00350314	2.97412	0.657474	0.255438	0.269517	0.592714	-2.94442	0.00161778	0.00305327	-2.79108
REACTOME_NFKB_AND_MAP_KINASES_ACTIVATION_MEDIATED_BY_TLR4_SIGNALING_REPERTOIRE	3.7586	8.54342e-05	0.000485092	4.06837	1.39768	0.081104	0.104099	1.09096	-2.32617	0.0100046	0.0147645	-1.9998
REACTOME_NFKB_IS_ACTIVATED_AND_SIGNALS_SURVIVAL	4.0204	2.90502e-05	0.000209287	4.53685	1.83272	0.0334221	0.0515963	1.47597	0.905472	0.182608	0.182881	0.738481
REACTOME_NGF_SIGNALLING_VIA_TRKA_FROM_THE_PLASMA_MEMBRANE	-2.29918	0.0107475	0.0228597	-1.96869	-3.40672	0.000328741	0.00105893	-3.48315	-4.69048	1.3628e-06	7.42336e-06	-5.86557
REACTOME_NITRIC_OXIDE_STIMULATES_GUANYLATE_CYCLASE	0.936146	0.174599	0.194321	0.757958	-4.1369	1.76018e-05	9.28599e-05	-4.75444	-2.41271	0.00791721	0.0120284	-2.10143
REACTOME_NOD1_2_SIGNALING_PATHWAY	1.89611	0.0289725	0.0487728	1.53801	0.602664	0.273366	0.281777	0.563255	-3.66722	0.000122599	0.000325957	-3.91151
REACTOME_NONSENSE_MEDIATED_DECAY_ENHANCED_BY_THE_EXON_JUNCTION_COMPLEX	2.69169	0.00355457	0.00926678	2.44921	3.60651	0.000155172	0.000565028	3.80919	5.17471	1.14131e-07	1.25716e-06	6.9426
REACTOME_NOREPINEPHRINE_NEUROTRANSMITTER_RELEASE_CYCLE	-4.34742	6.88729e-06	6.78601e-05	-5.16195	-3.49048	0.000241076	0.000841256	-3.61785	-4.14389	1.7073e-05	5.74821e-05	-4.76769
REACTOME_NOTCH_HLH_TRANSCRIPTION_PATHWAY	0.978495	0.163915	0.18365	0.785382	-2.43582	0.00742907	0.0147263	-2.12907	-3.28995	0.000501021	0.00114568	-3.30014
REACTOME_NOTCH1_INTRACELLULAR_DOMAIN_REGULATES_TRANSCRIPTION	-2.7137	0.00332681	0.00891586	-2.47797	-1.91368	0.0278307	0.0441862	-1.55548	-2.84835	0.0021973	0.00394689	-2.65811
REACTOME_NRAGE_SIGNALS_DEATH_THROUGH_JNK	-1.62684	0.0518856	0.0762354	-1.28495	-3.89433	4.92344e-05	0.000219914	-4.30773	-3.58623	0.000167748	0.000424118	-3.77534
REACTOME_NRIF_SIGNALS_CELL_DEATH_FROM_THE_NUCLEUS	2.54434	0.00547427	0.0130525	2.26167	2.05091	0.020138	0.0340719	1.69598	-1.37192	0.0850443	0.0954434	-1.07035
REACTOME_NUCLEAR_EVENTS_KINASE_AND_TRANSCRIPTION_FACTOR_ACTIVATION	2.02586	0.0213893	0.0394789	1.6698	0.922947	0.178017	0.202843	0.749537	-1.83272	0.0334221	0.0425719	-1.47597
REACTOME_NUCLEAR_RECEPTOR_TRANSCRIPTION_PATHWAY	3.93979	4.07759e-05	0.000273198	4.3896	1.12823	0.129612	0.157035	0.887355	-1.83272	0.0334221	0.0425719	-1.47597
REACTOME_NUCLEAR_SIGNALING_BY_ERBB4	2.62929	0.00427812	0.0106555	2.36875	-1.82862	0.033728	0.0519489	-1.47201	-3.12756	0.000881324	0.00188053	-3.05486
REACTOME_NUCLEOTIDE_BINDING_DOMAIN_LEUCINE_RICH_REPEAT_CONTAINING_RECEPTOR_NLR_SIGNALING_PATHWAYS	2.81494	0.0024393	0.00686695	2.61273	0.432015	0.332865	0.335873	0.477732	-4.25212	1.05877e-05	3.79346e-05	-4.9752
REACTOME_NUCLEOTIDE_EXCISION_REPAIR	0.673313	0.250374	0.255328	0.601411	4.49357	3.5019e-06	2.39416e-05	5.4557	4.42751	4.76633e-06	1.9959e-05	5.32182
REACTOME_NUCLEOTIDE_LIKE_PURINERGIC_RECEPTORS	4.17795	1.47077e-05	0.000121336	4.83245	1.138	0.12756	0.155392	0.894285	-2.11922	0.017036	0.0239793	-1.76863
REACTOME_O_LINKED_GLYCOSYLATION_OF_MUCINS	3.52342	0.000213008	0.000938916	3.6716	0.843242	0.199546	0.222827	0.699956	1.16765	0.121474	0.129186	0.915518
REACTOME_OLFACTORY_SIGNALING_PATHWAY	1.02635	0.152364	0.174205	0.817118	3.81721	6.74834e-05	0.000279098	4.1708	4.68098	1.42753e-06	7.59083e-06	5.84542
REACTOME_OPIOID_SIGNALLING	-1.92257	0.027267	0.0474517	-1.56436	-3.96975	3.59748e-05	0.000164247	-4.444	-4.66772	1.52279e-06	7.97087e-06	-5.81736
REACTOME_OPSINS	1.55023	0.0605428	0.0853973	1.21794	1.25461	0.104809	0.129801	0.9796	1.70854	0.0437677	0.0543044	1.35885
REACTOME_ORC1_REMOVAL_FROM_CHROMATIN	4.48636	3.62252e-06	4.75899e-05	5.44099	5.57527	1.23574e-08	3.31177e-07	7.90807	5.07887	1.89839e-07	1.87047e-06	6.72162
REACTOME_ORGANIC_CATION_ANION_ZWITTERION_TRANSPORT	0.815874	0.207286	0.219749	0.68343	-2.21677	0.0133195	0.0239894	-1.87551	-1.42687	0.0768092	0.0873721	-1.11459
REACTOME_OTHER_SEMAPHORIN_INTERACTIONS	1.3135	0.094507	0.119924	1.02454	-1.89611	0.0289725	0.045782	-1.53801	-4.3112	8.11871e-06	3.09064e-05	-5.09051
REACTOME_OXYGEN_DEPENDENT_PROLINE_HYDROXYLATION_OF_HYPOXIA_INDUCIBLE_FACTOR_ALPHA	2.06111	0.0196465	0.037184	1.70672	2.25385	0.0121027	0.022277	1.91712	2.52665	0.00575776	0.009185	2.23975
REACTOME_P130CAS_LINKAGE_TO_MAPK_SIGNALING_FOR_INTEGRINS	3.04231	0.00117385	0.00381786	2.93039	-1.73082	0.0417421	0.0614664	-1.37943	-1.84926	0.0322099	0.0412632	-1.49201
REACTOME_P2Y_RECEPTORS	3.39563	0.00034236	0.00137158	3.46552	0.585241	0.279193	0.286023	0.554096	-2.79642	0.0025836	0.00449614	-2.58777
REACTOME_P38MAPK_EVENTS	1.01485	0.155089	0.176417	0.809419	0.815874	0.207286	0.2288	0.68343	-1.66168	0.0482883	0.0591465	-1.31616
REACTOME_P53_DEPENDENT_G1_DNA_DAMAGE_RESPONSE	4.31882	7.84315e-06	7.50701e-05	5.10551	4.66842	1.51766e-06	1.19627e-05	5.81883	3.90397	4.73135e-05	0.000139648	4.32502
REACTOME_P53_INDEPENDENT_G1_S_DNA_DAMAGE_CHECKPOINT	4.91144	4.52052e-07	1.32257e-05	6.34481	4.83828	6.54851e-07	5.92906e-06	6.18386	4.74471	1.04404e-06	6.59859e-06	5.98128
REACTOME_P75_NTR_RECEPTOR_MEDIATED_SIGNALLING	0.687242	0.245965	0.251214	0.609127	-4.37025	6.20526e-06	3.98207e-05	-5.20724	-3.75856	8.54476e-05	0.000235596	-4.0683
REACTOME_P75NTR_RECRUITS_SIGNALLING_COMPLEXES	4.08374	2.21579e-05	0.000168003	4.65447	1.47182	0.0705351	0.0924825	1.15159	1.21568	0.112053	0.120506	0.950577
REACTOME_P75NTR_SIGNALS_VIA_NFKB	4.47804	3.76658e-06	4.82899e-05	5.42405	1.44467	0.0742751	0.0966297	1.12916	0.940564	0.173464	0.174506	0.76079
REACTOME_PACKAGING_OF_TELOMERE_ENDS	-1.38331	0.0832844	0.109199	-1.07944	5.06147	2.08021e-07	2.403e-06	6.68189	5.49486	1.95513e-08	3.63871e-07	7.70882
REACTOME_PASSIVE_TRANSPORT_BY_AQUAPORINS	1.7612	0.039102	0.0599505	1.4078	1.13067	0.129098	0.156695	0.88908	0.980748	0.163359	0.165333	0.786858
REACTOME_PD1_SIGNALING	4.11284	1.9541e-05	0.000152238	4.70905	2.65984	0.00390884	0.00875895	2.40795	-4.07562	2.29458e-05	7.35583e-05	-4.6393
REACTOME_PECAM1_INTERACTIONS	1.24675	0.106244	0.130852	0.973695	0.653527	0.256708	0.269584	0.59056	-2.39765	0.00825021	0.0123661	-2.08353
REACTOME_PEPTIDE_CHAIN_ELONGATION	3.45417	0.000275999	0.00116301	3.55909	4.03787	2.69691e-05	0.000129995	4.56913	5.41499	3.06454e-08	4.77498e-07	7.51364
REACTOME_PEPTIDE_HORMONE_BIOSYNTHESIS	1.74212	0.0407439	0.0614829	1.38994	0.677286	0.249112	0.263673	0.603605	1.16267	0.122481	0.130051	0.911932
REACTOME_PEPTIDE_LIGAND_BINDING_RECEPTORS	5.24548	7.79371e-08	4.35149e-06	7.10826	2.70261	0.00343984	0.00786586	2.46346	-2.08708	0.0184403	0.0255797	-1.73423
REACTOME_PERK_REGULATED_GENE_EXPRESSION	4.19342	1.37387e-05	0.000117717	4.86205	3.37197	0.000373165	0.00119058	3.4281	4.44195	4.45746e-06	1.91442e-05	5.35091
REACTOME_PEROXISOMAL_LIPID_METABOLISM	-2.50935	0.00604759	0.0142172	-2.21842	-2.63934	0.00415337	0.00921443	-2.3816	-2.35405	0.00928512	0.0137939	-2.03221
REACTOME_PHASE_II_CONJUGATION	1.94059	0.0261541	0.0459927	1.58246	-2.78401	0.00268458	0.00642381	-2.57112	1.76506	0.038777	0.0485618	1.41143
REACTOME_PHASE1_FUNCTIONALIZATION_OF_COMPOUNDS	4.14962	1.66514e-05	0.000132815	4.77855	0.681265	0.247852	0.262755	0.605808	2.39765	0.00825021	0.0123661	2.08353
REACTOME_PHOSPHOLIPASE_C_MEDIATED_CASCADE	0.639753	0.261167	0.264323	0.583082	-3.16982	0.000762661	0.00219306	-3.11767	-3.5841	0.000169118	0.000425974	-3.77181
REACTOME_PHOSPHOLIPID_METABOLISM	3.31686	0.000455178	0.00172299	3.34182	-4.07034	2.34728e-05	0.000114794	-4.62944	-4.89139	5.00626e-07	3.60666e-06	-6.30049
REACTOME_PHOSPHORYLATION_OF_CD3_AND_TCR_ZETA_CHAINS	3.00954	0.00130822	0.00417384	2.88332	2.50084	0.00619487	0.0127318	2.20797	-4.32486	7.6315e-06	2.96473e-05	-5.11739
REACTOME_PHOSPHORYLATION_OF_THE_APC_C	0.936146	0.174599	0.194321	0.757958	4.44024	4.49293e-06	3.04067e-05	5.34747	4.80269	7.82724e-07	5.19233e-06	6.10639
REACTOME_PI_3K_CASCADE	0.862375	0.194241	0.210584	0.71166	1.24675	0.106244	0.131335	0.973695	-1.51831	0.0644686	0.0753822	-1.19065
REACTOME_PI_METABOLISM	0.651555	0.257344	0.261243	0.589486	-2.47584	0.00664608	0.0135758	-2.17743	-4.70429	1.27377e-06	7.29424e-06	-5.89491
REACTOME_PI3K_AKT_ACTIVATION	-2.37557	0.00876097	0.0193724	-2.05745	-1.67233	0.0472293	0.0676145	-1.32579	-3.02014	0.00126328	0.00252656	-2.8985
REACTOME_PI3K_CASCADE	1.40928	0.0793755	0.10531	1.10031	0.97175	0.165587	0.191944	0.780973	1.10884	0.13375	0.140889	0.873708
REACTOME_PI3K_EVENTS_IN_ERBB2_SIGNALING	-1.89611	0.0289725	0.0487728	-1.53801	0.587173	0.278544	0.285795	0.555106	-2.93821	0.00165055	0.00309311	-2.78237
REACTOME_PI3K_EVENTS_IN_ERBB4_SIGNALING	-2.16957	0.0150196	0.0299497	-1.82334	0.747722	0.227314	0.24684	0.643374	-2.9908	0.00139126	0.00272556	-2.85659
REACTOME_PIP3_ACTIVATES_AKT_SIGNALING	-2.24756	0.012302	0.0254393	-1.91002	1.27577	0.101018	0.126037	0.995601	-2.40515	0.00808296	0.0121973	-2.09243
REACTOME_PKA_MEDIATED_PHOSPHORYLATION_OF_CREB	-3.42925	0.000302621	0.00125158	-3.5191	-3.694	0.000110376	0.000425011	-3.95713	-3.95321	3.85556e-05	0.000116361	-4.41391
REACTOME_PKB_MEDIATED_EVENTS	-2.4596	0.00695466	0.0160124	-2.15772	1.02174	0.153452	0.180373	0.814027	1.19529	0.115987	0.124139	0.935592
REACTOME_PLATELET_ACTIVATION_SIGNALING_AND_AGGREGATION	4.98471	3.10272e-07	1.03941e-05	6.50826	-2.70261	0.00343984	0.00786586	-2.46346	-5.34317	4.56665e-08	6.49744e-07	-7.3404
REACTOME_PLATELET_ADHESION_TO_EXPOSED_COLLAGEN	1.78847	0.0368499	0.0574173	1.43356	-1.36061	0.086818	0.110376	-1.06139	-2.79642	0.0025836	0.00449614	-2.58777
REACTOME_PLATELET_AGGREGATION_PLUG_FORMATION	2.7137	0.00332681	0.00891586	2.47797	0.727416	0.233486	0.2511	0.63174	-2.74801	0.00299794	0.00508512	-2.52318
REACTOME_PLATELET_CALCIUM_HOMEOSTASIS	0.695232	0.243455	0.249411	0.613581	-1.70487	0.0441091	0.0643859	-1.35547	-2.04585	0.0203857	0.0278744	-1.69067
REACTOME_PLATELET_HOMEOSTASIS	1.85344	0.0319097	0.0520183	1.49608	-2.99653	0.00136538	0.00361582	-2.86475	-4.47655	3.79299e-06	1.66098e-05	-5.42102
REACTOME_PLATELET_SENSITIZATION_BY_LDL	3.83143	6.37003e-05	0.000374379	4.19586	0.936146	0.174599	0.199968	0.757958	-2.57163	0.00506099	0.00823026	-2.29576
REACTOME_PLC_BETA_MEDIATED_EVENTS	-1.80037	0.0359015	0.0563325	-1.44489	-3.4399	0.000290961	0.000974719	-3.53617	-4.80373	7.78695e-07	5.19233e-06	-6.10863
REACTOME_POL_SWITCHING	1.05422	0.14589	0.168819	0.835975	4.94785	3.75189e-07	3.92776e-06	6.42575	4.95602	3.59751e-07	2.80271e-06	6.444
REACTOME_POST_CHAPERONIN_TUBULIN_FOLDING_PATHWAY	-1.52463	0.0636758	0.0888808	-1.19603	0.635828	0.262444	0.273464	0.580963	-2.14686	0.0159023	0.0224307	-1.79854
REACTOME_POST_NMDA_RECEPTOR_ACTIVATION_EVENTS	-2.27299	0.0115133	0.024031	-1.9388	-2.84835	0.0021973	0.00553454	-2.65811	-4.24906	1.07337e-05	3.82531e-05	-4.96925
REACTOME_POST_TRANSLATIONAL_MODIFICATION_SYNTHESIS_OF_GPI_ANCHORED_PROTEINS	-2.23512	0.0127048	0.0261111	-1.89603	0.901125	0.183761	0.207622	0.735747	0.994319	0.160034	0.162705	0.795788
REACTOME_POST_TRANSLATIONAL_PROTEIN_MODIFICATION	2.87769	0.00200302	0.00599969	2.69831	1.12093	0.131158	0.158335	0.882204	1.98707	0.0234573	0.03137	1.62972
REACTOME_POTASSIUM_CHANNELS	-2.44367	0.0072694	0.0166229	-2.1385	-2.82191	0.00238691	0.00583661	-2.62216	-2.89148	0.00191713	0.00349994	-2.71735
REACTOME_PPARA_ACTIVATES_GENE_EXPRESSION	1.57635	0.0574721	0.0824546	1.24054	0.372948	0.354593	0.355655	0.450269	-2.74801	0.00299794	0.00508512	-2.52318
REACTOME_PRE_NOTCH_EXPRESSION_AND_PROCESSING	-2.35405	0.00928512	0.0203968	-2.03221	0.508828	0.305436	0.310064	0.515079	-2.22284	0.0131132	0.0188943	-1.88229
REACTOME_PRE_NOTCH_PROCESSING_IN_GOLGI	0.885977	0.187815	0.205951	0.72627	-2.04585	0.0203857	0.0344041	-1.69067	-3.19206	0.000706303	0.00154648	-3.15101
REACTOME_PRE_NOTCH_TRANSCRIPTION_AND_TRANSLATION	-2.59038	0.00479353	0.0117643	-2.31934	-1.72335	0.042413	0.062181	-1.3725	-1.90926	0.0281144	0.0367186	-1.55107
REACTOME_PREFOLDIN_MEDIATED_TRANSFER_OF_SUBSTRATE_TO_CCT_TRIC	1.22856	0.109619	0.134023	0.960114	2.83501	0.00229122	0.00570675	2.63993	4.09452	2.11525e-05	6.91326e-05	4.67464
REACTOME_PRESYNAPTIC_NICOTINIC_ACETYLCHOLINE_RECEPTORS	-2.49242	0.00634371	0.0147579	-2.19766	-1.56977	0.0582339	0.0796259	-1.23482	-1.45366	0.0730202	0.0840611	-1.13656
REACTOME_PROCESSING_OF_CAPPED_INTRON_CONTAINING_PRE_MRNA	-4.19702	1.35228e-05	0.000117666	-4.86893	5.16704	1.18915e-07	1.62599e-06	6.92476	5.53282	1.57558e-08	3.19891e-07	7.80256
REACTOME_PROCESSING_OF_CAPPED_INTRONLESS_PRE_MRNA	1.40347	0.080238	0.106034	1.09562	4.56422	2.50678e-06	1.784e-05	5.60088	4.99749	2.90405e-07	2.41728e-06	6.537
REACTOME_PROCESSING_OF_INTRONLESS_PRE_MRNAS	0.989785	0.16114	0.180843	0.792798	4.31704	7.90667e-06	4.86006e-05	5.10201	4.58842	2.23302e-06	1.07635e-05	5.65111
REACTOME_PROCESSIVE_SYNTHESIS_ON_THE_LAGGING_STRAND	1.48406	0.0688968	0.094014	1.1618	4.97858	3.20255e-07	3.40589e-06	6.4945	5.02254	2.54958e-07	2.21847e-06	6.59353
REACTOME_PROLACTIN_RECEPTOR_SIGNALING	1.83683	0.0331173	0.0534665	1.47994	-1.53737	0.0621016	0.0833829	-1.2069	-2.36116	0.00910892	0.0135622	-2.04053
REACTOME_PROLONGED_ERK_ACTIVATION_EVENTS	-2.00144	0.0226724	0.0416177	-1.6445	-1.99184	0.0231944	0.0382764	-1.63462	-2.10301	0.0177322	0.0248029	-1.75124
REACTOME_PROSTACYCLIN_SIGNALLING_THROUGH_PROSTACYCLIN_RECEPTOR	1.27311	0.101489	0.125689	0.99358	-1.547	0.0609311	0.0828069	-1.21516	-3.17292	0.000754566	0.00164677	-3.1223
REACTOME_PROSTANOID_LIGAND_RECEPTORS	3.14733	0.000823832	0.00284519	3.08416	1.41805	0.0780883	0.100808	1.10741	-1.51831	0.0644686	0.0753822	-1.19065
REACTOME_PROTEIN_FOLDING	1.25724	0.104333	0.128735	0.98158	2.51796	0.00590189	0.0123186	2.22901	3.03265	0.00121206	0.00243869	2.91647
REACTOME_PROTEOLYTIC_CLEAVAGE_OF_SNARE_COMPLEX_PROTEINS	-2.55333	0.00533491	0.0127657	-2.27287	-2.77181	0.0027873	0.0066223	-2.55482	-4.23999	1.11763e-05	3.94112e-05	-4.9517
REACTOME_PTM_GAMMA_CARBOXYLATION_HYPUSINE_FORMATION_AND_ARYLSULFATASE_ACTIVATION	1.37761	0.0841626	0.10992	1.07488	-2.38287	0.00858922	0.0166323	-2.06605	1.64414	0.050074	0.0609993	1.30039
REACTOME_PURINE_CATABOLISM	1.36061	0.086818	0.112729	1.06139	1.01485	0.155089	0.181978	0.809419	-1.11851	0.131675	0.138933	-0.880496
REACTOME_PURINE_METABOLISM	2.89486	0.00189666	0.00575005	2.72201	3.05148	0.00113858	0.00307601	2.94364	3.6462	0.000133075	0.000346928	3.8759
REACTOME_PURINE_RIBONUCLEOSIDE_MONOPHOSPHATE_BIOSYNTHESIS	1.56977	0.0582339	0.0830142	1.23482	3.76717	8.25536e-05	0.000329232	4.08326	4.55141	2.66442e-06	1.25715e-05	5.5744
REACTOME_PURINE_SALVAGE	3.70823	0.000104356	0.00055054	3.98148	2.4596	0.00695466	0.013951	2.15772	1.99184	0.0231944	0.0310805	1.63462
REACTOME_PYRIMIDINE_CATABOLISM	-2.87583	0.00201482	0.00599969	-2.69576	-3.66241	0.000124926	0.000470226	-3.90335	-3.67456	0.000119128	0.000317991	-3.92399
REACTOME_PYRIMIDINE_METABOLISM	-2.65984	0.00390884	0.0100342	-2.40795	0.918565	0.179162	0.20311	0.746755	1.61999	0.0526173	0.0629529	1.27887
REACTOME_PYRUVATE_METABOLISM	2.67031	0.00378908	0.00976416	2.42147	2.31935	0.0101882	0.0193373	1.9919	2.4596	0.00695466	0.010887	2.15772
REACTOME_PYRUVATE_METABOLISM_AND_CITRIC_ACID_TCA_CYCLE	1.93606	0.0264305	0.0463571	1.57789	2.44367	0.0072694	0.0144525	2.1385	2.79642	0.0025836	0.00449614	2.58777
REACTOME_RAF_MAP_KINASE_CASCADE	-1.27577	0.101018	0.125337	-0.995601	2.10839	0.0174988	0.0306116	1.75699	1.09444	0.136882	0.142408	0.863654
REACTOME_RAP1_SIGNALLING	0.892456	0.186074	0.205049	0.730314	-1.85763	0.0316108	0.0491397	-1.50017	-2.97896	0.00144616	0.00280037	-2.83978
REACTOME_RAS_ACTIVATION_UOPN_CA2_INFUX_THROUGH_NMDA_RECEPTOR	0.998863	0.158931	0.178664	0.798792	0.59491	0.275952	0.284006	0.559167	-3.08792	0.00100783	0.00207767	-2.99661
REACTOME_RECEPTOR_LIGAND_BINDING_INITIATES_THE_SECOND_PROTEOLYTIC_CLEAVAGE_OF_NOTCH_RECEPTOR	2.10301	0.0177322	0.034337	1.75124	-1.89177	0.0292609	0.0460207	-1.53371	-1.38046	0.0837231	0.0942764	-1.07715
REACTOME_RECRUITMENT_OF_MITOTIC_CENTROSOME_PROTEINS_AND_COMPLEXES	-4.63465	1.78774e-06	2.93589e-05	-5.7477	1.25988	0.103857	0.129098	0.983565	1.60978	0.0537226	0.0641607	1.26984
REACTOME_RECRUITMENT_OF_NUMA_TO_MITOTIC_CENTROSOMES	-3.16982	0.000762661	0.00266137	-3.11767	1.45667	0.0726037	0.0948236	1.13904	1.59296	0.0555849	0.0660316	1.25504
REACTOME_RECYCLING_OF_BILE_ACIDS_AND_SALTS	0.864511	0.193654	0.210584	0.712974	1.49331	0.0676779	0.0892602	1.16955	2.07141	0.0191601	0.0263599	1.7176
REACTOME_RECYCLING_PATHWAY_OF_L1	1.04256	0.148576	0.171041	0.828051	1.45366	0.0730202	0.095182	1.13656	-2.44367	0.0072694	0.0112483	-2.1385
REACTOME_REGULATED_PROTEOLYSIS_OF_P75NTR	1.32721	0.0922204	0.118367	1.03517	0.947208	0.171766	0.197399	0.765062	-2.98167	0.00143341	0.00279181	-2.84363
REACTOME_REGULATION_OF_AMPK_ACTIVITY_VIA_LKB1	-2.99823	0.00135774	0.00429099	-2.86718	-2.41271	0.00791721	0.0154651	-2.10143	-3.12756	0.000881324	0.00188053	-3.05486
REACTOME_REGULATION_OF_APOPTOSIS	3.61341	0.000151101	0.000728328	3.82073	3.64356	0.000134446	0.000500438	3.87145	2.27946	0.0113197	0.0165233	1.94616
REACTOME_REGULATION_OF_BETA_CELL_DEVELOPMENT	2.63934	0.00415337	0.0104615	2.3816	2.72496	0.00321548	0.00745457	2.49275	3.424	0.000308529	0.000743577	3.5107
REACTOME_REGULATION_OF_COMPLEMENT_CASCADE	3.85017	5.90174e-05	0.000349926	4.22902	1.30534	0.0958888	0.120085	1.01823	-1.83683	0.0331173	0.0423447	-1.47994
REACTOME_REGULATION_OF_GENE_EXPRESSION_IN_BETA_CELLS	2.24132	0.0125027	0.0257748	1.903	2.65984	0.00390884	0.00875895	2.40795	3.20496	0.000675396	0.00149345	3.17044
REACTOME_REGULATION_OF_GLUCOKINASE_BY_GLUCOKINASE_REGULATORY_PROTEIN	-2.28599	0.0111275	0.0233713	-1.9536	3.42082	0.000312158	0.00102522	3.50563	4.32067	7.77783e-06	2.99491e-05	5.10914
REACTOME_REGULATION_OF_HYPOXIA_INDUCIBLE_FACTOR_HIF_BY_OXYGEN	0.916377	0.179734	0.199045	0.745369	1.5278	0.0632808	0.0842906	1.19873	1.64066	0.0504343	0.0611048	1.29727
REACTOME_REGULATION_OF_IFNA_SIGNALING	3.88505	5.11542e-05	0.000314434	4.29112	1.34103	0.0899547	0.113502	1.04598	-3.15556	0.000800954	0.00172553	-3.09639
REACTOME_REGULATION_OF_IFNG_SIGNALING	3.96	3.74742e-05	0.000258842	4.42627	1.15276	0.124504	0.1525	0.904817	-3.07958	0.00103646	0.00213015	-2.98445
REACTOME_REGULATION_OF_INSULIN_LIKE_GROWTH_FACTOR_IGF_ACTIVITY_BY_INSULIN_LIKE_GROWTH_FACTOR_BINDING_PROTEINS_IGFBPS	3.66365	0.000124323	0.000626291	3.90545	0.717318	0.236589	0.253218	0.626006	1.36343	0.0863733	0.0966112	1.06362
REACTOME_REGULATION_OF_INSULIN_SECRETION	0.583311	0.279842	0.281946	0.553087	-3.26398	0.000549289	0.00168818	-3.2602	-4.72706	1.13899e-06	6.93749e-06	-5.94348
REACTOME_REGULATION_OF_INSULIN_SECRETION_BY_ACETYLCHOLINE	0.782604	0.21693	0.228168	0.663681	-2.84835	0.0021973	0.00553454	-2.65811	-3.22598	0.000627711	0.00139479	-3.20224
REACTOME_REGULATION_OF_INSULIN_SECRETION_BY_GLUCAGON_LIKE_PEPTIDE1	1.01027	0.156183	0.177061	0.806365	-2.59992	0.00466222	0.0100764	-2.33141	-3.91748	4.47391e-05	0.000132634	-4.34931
REACTOME_REGULATION_OF_KIT_SIGNALING	1.15771	0.123491	0.147222	0.908365	0.701238	0.241577	0.256915	0.616944	-2.30585	0.0105596	0.0155493	-1.97635
REACTOME_REGULATION_OF_MITOTIC_CELL_CYCLE	4.1911	1.38801e-05	0.000117717	4.85761	6.35767	1.02416e-10	1.80064e-08	9.98963	5.54918	1.43508e-08	3.10162e-07	7.84312
REACTOME_REGULATION_OF_MRNA_STABILITY_BY_PROTEINS_THAT_BIND_AU_RICH_ELEMENTS	4.67664	1.45808e-06	2.87328e-05	5.83622	5.14469	1.3398e-07	1.76013e-06	6.87296	4.26629	9.93752e-06	3.61855e-05	5.00272
REACTOME_REGULATION_OF_ORNITHINE_DECARBOXYLASE_ODC	4.63584	1.77749e-06	2.93589e-05	5.75019	4.92074	4.31084e-07	4.31084e-06	6.36544	3.53822	0.000201415	0.000501666	3.69591
REACTOME_REGULATION_OF_PYRUVATE_DEHYDROGENASE_PDH_COMPLEX	1.53737	0.0621016	0.0870462	1.2069	1.5963	0.0552104	0.0764276	1.25798	1.10403	0.134791	0.140889	0.870339
REACTOME_REGULATION_OF_RHEB_GTPASE_ACTIVITY_BY_AMPK	-3.40672	0.000328741	0.00134303	-3.48315	-1.39768	0.081104	0.104099	-1.09096	-2.74801	0.00299794	0.00508512	-2.52318
REACTOME_REGULATION_OF_SIGNALING_BY_CBL	0.759981	0.223633	0.233024	0.650464	-2.24756	0.012302	0.0224587	-1.91002	-4.25605	1.04034e-05	3.74747e-05	-4.98282
REACTOME_REGULATION_OF_THE_FANCONI_ANEMIA_PATHWAY	2.8381	0.00226916	0.00649718	2.64413	2.72496	0.00321548	0.00745457	2.49275	3.27612	0.000526224	0.00119515	3.27883
REACTOME_REGULATION_OF_WATER_BALANCE_BY_RENAL_AQUAPORINS	-1.88313	0.0298413	0.0494893	-1.52518	-3.23907	0.000599602	0.00180961	-3.22214	-4.70969	1.24049e-06	7.2272e-06	-5.90641
REACTOME_REGULATORY_RNA_PATHWAYS	-3.59592	0.000161624	0.000762593	-3.79149	1.16765	0.121474	0.149061	0.915518	0.927338	0.176876	0.177671	0.752332
REACTOME_REMOVAL_OF_THE_FLAP_INTERMEDIATE_FROM_THE_C_STRAND	1.82862	0.033728	0.0540617	1.47201	4.23508	1.14236e-05	6.65549e-05	4.9422	4.49817	3.4271e-06	1.52063e-05	5.46507
REACTOME_REPAIR_SYNTHESIS_FOR_GAP_FILLING_BY_DNA_POL_IN_TC_NER	-1.60303	0.0544645	0.0791566	-1.26389	4.5577	2.58589e-06	1.80474e-05	5.58739	4.40314	5.33478e-06	2.19282e-05	5.27288
REACTOME_RESOLUTION_OF_AP_SITES_VIA_THE_MULTIPLE_NUCLEOTIDE_PATCH_REPLACEMENT_PATHWAY	-1.29452	0.0977426	0.122866	-1.00992	4.23127	1.16189e-05	6.7109e-05	4.93484	4.43355	4.63463e-06	1.95296e-05	5.33399
REACTOME_RESOLUTION_OF_AP_SITES_VIA_THE_SINGLE_NUCLEOTIDE_REPLACEMENT_PATHWAY	-2.29256	0.0109368	0.0230429	-1.96111	2.45159	0.00711126	0.0142225	2.14805	2.89638	0.0018875	0.00345525	2.72411
REACTOME_RESPIRATORY_ELECTRON_TRANSPORT	3.35183	0.000401395	0.0015517	3.39643	3.63295	0.000140101	0.000518605	3.85356	4.39182	5.62023e-06	2.28215e-05	5.25025
REACTOME_RESPIRATORY_ELECTRON_TRANSPORT_ATP_SYNTHESIS_BY_CHEMIOSMOTIC_COUPLING_AND_HEAT_PRODUCTION_BY_UNCOUPLING_PROTEINS_	3.40437	0.000331581	0.00134642	3.47941	4.04513	2.61472e-05	0.000126947	4.58257	4.58658	2.25284e-06	1.07814e-05	5.64727
REACTOME_RESPONSE_TO_ELEVATED_PLATELET_CYTOSOLIC_CA2_	5.82721	2.81804e-09	6.29362e-07	8.55005	1.98707	0.0234573	0.0386151	1.62972	-3.79884	7.26869e-05	0.000204623	-4.13854
REACTOME_RETROGRADE_NEUROTROPHIN_SIGNALLING	0.864511	0.193654	0.210584	0.712974	0.853852	0.196593	0.220263	0.706431	-2.97568	0.00146171	0.00281422	-2.83514
REACTOME_REVERSIBLE_HYDRATION_OF_CARBON_DIOXIDE	0.998863	0.158931	0.178664	0.798792	-2.22896	0.0129083	0.0233745	-1.88913	-1.32171	0.0931326	0.10263	-1.0309
REACTOME_RIG_I_MDA5_MEDIATED_INDUCTION_OF_IFN_ALPHA_BETA_PATHWAYS	4.04075	2.66408e-05	0.000194014	4.57445	1.75353	0.0397555	0.0591915	1.4006	-3.41793	0.000315495	0.000752247	-3.50101
REACTOME_RIP_MEDIATED_NFKB_ACTIVATION_VIA_DAI	3.86571	5.53827e-05	0.000334292	4.25663	1.38904	0.0824096	0.105573	1.08402	-2.83501	0.00229122	0.00407192	-2.63993
REACTOME_RNA_POL_I_PROMOTER_OPENING	1.15524	0.123997	0.147563	0.906589	5.56705	1.29543e-08	3.33823e-07	7.88759	5.18577	1.0756e-07	1.25716e-06	6.96835
REACTOME_RNA_POL_I_RNA_POL_III_AND_MITOCHONDRIAL_TRANSCRIPTION	-1.58962	0.0559603	0.0809793	-1.25212	5.60367	1.04931e-08	3.00438e-07	7.9791	5.59354	1.11241e-08	2.57005e-07	7.95374
REACTOME_RNA_POL_I_TRANSCRIPTION	1.15276	0.124504	0.147904	0.904817	5.35942	4.17446e-08	7.55915e-07	7.3794	5.75915	4.22694e-09	1.75097e-07	8.37397
REACTOME_RNA_POL_I_TRANSCRIPTION_INITIATION	0.85811	0.195416	0.211516	0.70904	1.67233	0.0472293	0.0676145	1.32579	3.16667	0.000770966	0.00167167	3.11296
REACTOME_RNA_POL_I_TRANSCRIPTION_TERMINATION	1.44169	0.0746952	0.0998917	1.12671	1.63373	0.0511579	0.071857	1.29109	3.37304	0.00037172	0.000870814	3.42978
REACTOME_RNA_POL_II_PRE_TRANSCRIPTION_EVENTS	0.768185	0.221189	0.230836	0.655237	3.99627	3.2174e-05	0.000151807	4.4925	3.86111	5.64368e-05	0.000162286	4.24844
REACTOME_RNA_POL_II_TRANSCRIPTION	0.567907	0.285049	0.286761	0.54508	4.67401	1.47689e-06	1.178e-05	5.83065	4.69494	1.33342e-06	7.42336e-06	5.87503
REACTOME_RNA_POL_II_TRANSCRIPTION_PRE_INITIATION_AND_PROMOTER_OPENING	0.782604	0.21693	0.228168	0.663681	2.64952	0.00403028	0.00900095	2.39466	2.77935	0.00272337	0.00471487	2.56489
REACTOME_RNA_POL_III_CHAIN_ELONGATION	0.885977	0.187815	0.205951	0.72627	3.18716	0.000718389	0.00212036	3.14364	3.95139	3.88491e-05	0.000116721	4.41062
REACTOME_RNA_POL_III_TRANSCRIPTION	-1.63373	0.0511579	0.0753314	-1.29109	4.15844	1.60212e-05	8.58736e-05	4.7953	4.69117	1.35825e-06	7.42336e-06	5.86702
REACTOME_RNA_POL_III_TRANSCRIPTION_INITIATION_FROM_TYPE_2_PROMOTER	-1.7612	0.039102	0.0599505	-1.4078	4.14129	1.72679e-05	9.18216e-05	4.76276	4.21003	1.2767e-05	4.41503e-05	4.89391
REACTOME_RNA_POL_III_TRANSCRIPTION_INITIATION_FROM_TYPE_3_PROMOTER	-1.20037	0.114999	0.139078	-0.939307	3.24011	0.000597409	0.00180961	3.22373	3.95718	3.79205e-05	0.000114963	4.42113
REACTOME_RNA_POL_III_TRANSCRIPTION_TERMINATION	0.905472	0.182608	0.201893	0.738481	3.03689	0.00119517	0.00321593	2.92257	3.8205	6.65918e-05	0.000189053	4.17658
REACTOME_ROLE_OF_DCC_IN_REGULATING_APOPTOSIS	-2.94972	0.00159033	0.00491024	-2.79851	-3.66798	0.000122236	0.000465329	-3.9128	-3.70049	0.000107592	0.000288347	-3.96822
REACTOME_ROLE_OF_SECOND_MESSENGERS_IN_NETRIN1_SIGNALING	-2.94972	0.00159033	0.00491024	-2.79851	-2.24756	0.012302	0.0224587	-1.91002	-2.42034	0.00775298	0.0118867	-2.11053
REACTOME_RORA_ACTIVATES_CIRCADIAN_EXPRESSION	-1.65112	0.0493566	0.0733236	-1.30665	-2.28599	0.0111275	0.0208253	-1.9536	-2.80003	0.00255491	0.00449614	-2.59262
REACTOME_S_PHASE	3.48468	0.000246359	0.00106073	3.60843	5.54892	1.43724e-08	3.37946e-07	7.84247	6.17684	3.26979e-10	3.44262e-08	9.48548
REACTOME_SCF_BETA_TRCP_MEDIATED_DEGRADATION_OF_EMI1	4.17576	1.48497e-05	0.000121336	4.82828	5.14952	1.30575e-07	1.74971e-06	6.88414	4.12389	1.8626e-05	6.1475e-05	4.72988
REACTOME_SCFSKP2_MEDIATED_DEGRADATION_OF_P27_P21	4.35806	6.56094e-06	6.56094e-05	5.18303	5.1081	1.6271e-07	2.03509e-06	6.78859	4.13111	1.80507e-05	5.9876e-05	4.74351
REACTOME_SEMA3A_PAK_DEPENDENT_AXON_REPULSION	-2.88999	0.00192628	0.00581356	-2.71528	-1.53098	0.0628868	0.0841001	-1.20144	-3.37724	0.000366087	0.000860626	-3.43642
REACTOME_SEMA3A_PLEXIN_REPULSION_SIGNALING_BY_INHIBITING_INTEGRIN_ADHESION	-1.28378	0.0996095	0.12428	-1.0017	-3.59592	0.000161624	0.000585341	-3.79149	-3.8743	5.34651e-05	0.000155072	-4.27193
REACTOME_SEMA4D_IN_SEMAPHORIN_SIGNALING	1.49331	0.0676779	0.0933008	1.16955	-2.99823	0.00135774	0.00360988	-2.86718	-4.15346	1.63742e-05	5.54078e-05	-4.78584
REACTOME_SEMA4D_INDUCED_CELL_MIGRATION_AND_GROWTH_CONE_COLLAPSE	0.774355	0.219361	0.230363	0.658841	-3.42744	0.000304651	0.00101048	-3.5162	-4.50349	3.34231e-06	1.50292e-05	-5.47595
REACTOME_SEMAPHORIN_INTERACTIONS	-1.87456	0.0304264	0.0503351	-1.51675	-4.07034	2.34728e-05	0.000114794	-4.62944	-5.58523	1.16693e-08	2.60614e-07	-7.93296
REACTOME_SEROTONIN_RECEPTORS	0.820065	0.20609	0.219523	0.685944	-1.40928	0.0793755	0.102272	-1.10031	-1.19783	0.115492	0.123808	-0.937447
REACTOME_SHC_MEDIATED_CASCADE	2.73639	0.00310585	0.00849356	2.50782	2.68092	0.00367098	0.00833749	2.43522	1.99184	0.0231944	0.0310805	1.63462
REACTOME_SHC_MEDIATED_SIGNALLING	-1.90926	0.0281144	0.048548	-1.55107	1.53737	0.0621016	0.0833829	1.2069	-0.985261	0.162248	0.164457	-0.789821
REACTOME_SHC_RELATED_EVENTS	-1.9729	0.0242534	0.0436821	-1.61523	1.59966	0.0548369	0.0760678	1.26093	-1.138	0.12756	0.135016	-0.894285
REACTOME_SHC1_EVENTS_IN_EGFR_SIGNALING	-1.32445	0.0926761	0.118725	-1.03303	1.53737	0.0621016	0.0833829	1.2069	-1.5278	0.0632808	0.0743827	-1.19873
REACTOME_SHC1_EVENTS_IN_ERBB4_SIGNALING	0.659449	0.254804	0.259057	0.593794	1.38046	0.0837231	0.106847	1.07715	-1.52146	0.0640717	0.0751805	-1.19333
REACTOME_SIGNAL_AMPLIFICATION	1.81642	0.0346527	0.0554112	1.46026	0.663404	0.253536	0.267932	0.59596	-3.23965	0.000598389	0.0013499	-3.22302
REACTOME_SIGNAL_ATTENUATION	-2.05599	0.0198916	0.0372273	-1.70133	-2.44367	0.0072694	0.0144525	-2.1385	-2.91179	0.00179684	0.00331648	-2.74549
REACTOME_SIGNAL_REGULATORY_PROTEIN_SIRP_FAMILY_INTERACTIONS	3.01309	0.001293	0.00414502	2.8884	1.547	0.0609311	0.0828069	1.21516	-4.03884	2.68575e-05	8.36956e-05	-4.57093
REACTOME_SIGNAL_TRANSDUCTION_BY_L1	1.22339	0.11059	0.134965	0.956283	-1.95893	0.0250606	0.0407539	-1.60101	-3.10743	0.000943601	0.00197217	-3.02521
REACTOME_SIGNALING_BY_ACTIVATED_POINT_MUTANTS_OF_FGFR1	1.90486	0.0283992	0.0486636	1.54669	0.851727	0.197183	0.220555	0.705131	2.02586	0.0213893	0.0290687	1.6698
REACTOME_SIGNALING_BY_BMP	-2.29256	0.0109368	0.0230429	-1.96111	-1.91811	0.0275482	0.0438416	-1.55991	-2.79642	0.0025836	0.00449614	-2.58777
REACTOME_SIGNALING_BY_CONSTITUTIVELY_ACTIVE_EGFR	-2.16384	0.0152382	0.0302956	-1.81707	-1.81239	0.0349632	0.0532394	-1.45639	-1.88744	0.0295505	0.0382217	-1.52943
REACTOME_SIGNALING_BY_EGFR_IN_CANCER	-2.84835	0.0021973	0.00631942	-2.65811	-3.16982	0.000762661	0.00219306	-3.11767	-4.90979	4.55863e-07	3.38467e-06	-6.34117
REACTOME_SIGNALING_BY_ERBB2	-3.19206	0.000706303	0.00249065	-3.15101	-3.12756	0.000881324	0.00247066	-3.05486	-4.2585	1.02903e-05	3.72676e-05	-4.98757
REACTOME_SIGNALING_BY_ERBB4	0.956099	0.169511	0.189287	0.770802	0.73552	0.231011	0.249239	0.636367	-3.43961	0.000291282	0.000707097	-3.53569
REACTOME_SIGNALING_BY_FGFR	-2.80905	0.00248438	0.00696457	-2.60478	-2.46768	0.0067996	0.0138472	-2.16752	-3.86444	5.56714e-05	0.000160775	-4.25437
REACTOME_SIGNALING_BY_FGFR_IN_DISEASE	-3.16982	0.000762661	0.00266137	-3.11767	-3.06897	0.00107399	0.00293664	-2.969	-4.66092	1.57402e-06	8.17514e-06	-5.80299
REACTOME_SIGNALING_BY_FGFR_MUTANTS	-1.36061	0.086818	0.112729	-1.06139	-1.90926	0.0281144	0.044531	-1.55107	-2.82191	0.00238691	0.00423077	-2.62216
REACTOME_SIGNALING_BY_FGFR1_FUSION_MUTANTS	-2.83501	0.00229122	0.0065324	-2.63993	-3.81391	6.83916e-05	0.000279405	-4.165	-4.20405	1.31093e-05	4.50423e-05	-4.88242
REACTOME_SIGNALING_BY_FGFR1_MUTANTS	-2.27299	0.0115133	0.024031	-1.9388	-2.82191	0.00238691	0.00583661	-2.62216	-3.29455	0.000492889	0.00113483	-3.30725
REACTOME_SIGNALING_BY_FGFR3_MUTANTS	1.94514	0.0258789	0.0458699	1.58705	1.26516	0.102907	0.128156	0.987554	2.41271	0.00791721	0.0120284	2.10143
REACTOME_SIGNALING_BY_GPCR	3.47339	0.000256963	0.00109659	3.59013	0.0248156	0.490101	0.490101	0.309714	-5.26383	7.05422e-08	8.9176e-07	-7.15155
REACTOME_SIGNALING_BY_HIPPO	1.02174	0.153452	0.174852	0.814027	-2.16957	0.0150196	0.0266926	-1.82334	-1.90048	0.0286853	0.0372464	-1.54234
REACTOME_SIGNALING_BY_ILS	2.58095	0.00492645	0.0120026	2.30747	0.701238	0.241577	0.256915	0.616944	-5.2946	5.96396e-08	7.83501e-07	-7.22447
REACTOME_SIGNALING_BY_INSULIN_RECEPTOR	1.33272	0.0913116	0.117426	1.03947	1.02404	0.152908	0.180366	0.815571	-1.48099	0.069305	0.0803363	-1.15924
REACTOME_SIGNALING_BY_NODAL	-2.86196	0.00210516	0.00615921	-2.67671	-1.66877	0.0475812	0.0676845	-1.32256	-2.05091	0.020138	0.0276485	-1.69598
REACTOME_SIGNALING_BY_NOTCH	-3.64277	0.000134858	0.000674292	-3.87012	-2.77181	0.0027873	0.0066223	-2.55482	-3.60781	0.000154394	0.000396251	-3.81137
REACTOME_SIGNALING_BY_NOTCH1	-3.694	0.000110376	0.00057327	-3.95713	-2.93429	0.00167157	0.00437481	-2.77688	-3.90186	4.77283e-05	0.000140254	-4.32122
REACTOME_SIGNALING_BY_NOTCH2	1.29722	0.0972779	0.122512	1.01199	-2.93429	0.00167157	0.00437481	-2.77688	-3.05056	0.00114207	0.0023258	-2.94231
REACTOME_SIGNALING_BY_NOTCH3	-1.62341	0.0522509	0.0766042	-1.28191	-3.23907	0.000599602	0.00180961	-3.22214	-3.14834	0.000821006	0.00176306	-3.08565
REACTOME_SIGNALING_BY_NOTCH4	-1.86184	0.0313129	0.0511699	-1.50428	-3.40672	0.000328741	0.00105893	-3.48315	-3.28995	0.000501021	0.00114568	-3.30014
REACTOME_SIGNALING_BY_PDGF	0.927338	0.176876	0.196203	0.752332	-3.40672	0.000328741	0.00105893	-3.48315	-5.05926	2.10447e-07	1.98591e-06	-6.67686
REACTOME_SIGNALING_BY_RHO_GTPASES	1.08966	0.137932	0.160441	0.860336	-3.14524	0.000829748	0.00235564	-3.08105	-4.40786	5.2199e-06	2.15885e-05	-5.28234
REACTOME_SIGNALING_BY_ROBO_RECEPTOR	-3.4399	0.000290961	0.00121083	-3.53617	-3.4399	0.000290961	0.000974719	-3.53617	-3.92891	4.26658e-05	0.000127617	-4.36992
REACTOME_SIGNALING_BY_SCF_KIT	0.533489	0.296848	0.298183	0.527466	0.73755	0.230394	0.249239	0.637529	-3.70239	0.000106791	0.000287348	-3.97147
REACTOME_SIGNALING_BY_TGF_BETA_RECEPTOR_COMPLEX	2.34	0.00964194	0.0210427	2.01584	2.4596	0.00695466	0.013951	2.15772	-1.33826	0.0904062	0.100119	-1.0438
REACTOME_SIGNALING_BY_THE_B_CELL_RECEPTOR_BCR	3.42584	0.000306455	0.00125966	3.51363	4.10238	2.04462e-05	0.000107023	4.68939	-3.10743	0.000943601	0.00197217	-3.02521
REACTOME_SIGNALING_BY_WNT	4.50904	3.25613e-06	4.61412e-05	5.4873	4.43057	4.69919e-06	3.14846e-05	5.32798	3.10115	0.000963854	0.00200553	3.01599
REACTOME_SIGNALLING_BY_NGF	-2.22284	0.0131132	0.0267862	-1.88229	-4.65351	1.63168e-06	1.21469e-05	-5.78737	-5.02563	2.50896e-07	2.21184e-06	-6.60051
REACTOME_SIGNALLING_TO_ERKS	-1.79639	0.0362165	0.056694	-1.44109	-2.32617	0.0100046	0.0190429	-1.9998	-2.49242	0.00634371	0.010048	-2.19766
REACTOME_SIGNALLING_TO_P38_VIA_RIT_AND_RIN	-1.74971	0.0400838	0.0608984	-1.39703	0.757934	0.224245	0.2443	0.649277	-1.94059	0.0261541	0.0344945	-1.58246
REACTOME_SIGNALLING_TO_RAS	-1.38046	0.0837231	0.109559	-1.07715	0.61433	0.269498	0.279079	0.569444	-1.71963	0.0427501	0.0532389	-1.36906
REACTOME_SLBP_DEPENDENT_PROCESSING_OF_REPLICATION_DEPENDENT_HISTONE_PRE_MRNAS	1.54057	0.0617105	0.0868614	1.20964	2.87636	0.00201147	0.00520341	2.69649	3.58707	0.00016721	0.000424118	3.77674
REACTOME_SLC_MEDIATED_TRANSMEMBRANE_TRANSPORT	1.40928	0.0793755	0.10531	1.10031	0.562148	0.287008	0.29358	0.542106	-1.18519	0.117972	0.125861	-0.928223
REACTOME_SMAD2_SMAD3_SMAD4_HETEROTRIMER_REGULATES_TRANSCRIPTION	2.8483	0.00219765	0.00631942	2.65804	3.28966	0.000501544	0.00155571	3.29969	1.88744	0.0295505	0.0382217	1.52943
REACTOME_SMOOTH_MUSCLE_CONTRACTION	3.75565	8.64451e-05	0.000486708	4.06326	-3.74792	8.91539e-05	0.00035345	-4.04986	-4.26888	9.82301e-06	3.61373e-05	-5.00776
REACTOME_SOS_MEDIATED_SIGNALLING	-1.59966	0.0548369	0.0795254	-1.26093	1.52146	0.0640717	0.0850061	1.19333	-1.23893	0.107686	0.11637	-0.967841
REACTOME_SPHINGOLIPID_DE_NOVO_BIOSYNTHESIS	3.72461	9.78091e-05	0.000522126	4.00962	1.10403	0.134791	0.161556	0.870339	-2.42034	0.00775298	0.0118867	-2.11053
REACTOME_SPHINGOLIPID_METABOLISM	3.73725	9.30205e-05	0.000508529	4.03142	0.406087	0.342339	0.344913	0.465543	-3.10743	0.000943601	0.00197217	-3.02521
REACTOME_SPRY_REGULATION_OF_FGF_SIGNALING	0.888135	0.187234	0.205951	0.727615	1.54057	0.0617105	0.0833589	1.20964	-1.36626	0.0859294	0.0962755	-1.06586
REACTOME_SRP_DEPENDENT_COTRANSLATIONAL_PROTEIN_TARGETING_TO_MEMBRANE	4.47503	3.81995e-06	4.82899e-05	5.41794	4.76868	9.27165e-07	8.06754e-06	6.03284	5.45653	2.4276e-08	4.1295e-07	7.61482
REACTOME_STEROID_HORMONES	0.839011	0.200731	0.215184	0.697385	-2.16957	0.0150196	0.0266926	-1.82334	-1.547	0.0609311	0.0717466	-1.21516
REACTOME_STRIATED_MUSCLE_CONTRACTION	1.34103	0.0899547	0.116351	1.04598	0.622131	0.266928	0.276845	0.573606	-1.95893	0.0250606	0.0333147	-1.60101
REACTOME_SULFUR_AMINO_ACID_METABOLISM	2.61938	0.00440452	0.0108894	2.3561	1.12093	0.131158	0.158335	0.882204	2.99823	0.00135774	0.00267556	2.86718
REACTOME_SYNTHESIS_AND_INTERCONVERSION_OF_NUCLEOTIDE_DI_AND_TRIPHOSPHATES	1.5665	0.0586162	0.0832053	1.23198	2.55333	0.00533491	0.0113473	2.27287	2.9463	0.001608	0.00304339	2.79371
REACTOME_SYNTHESIS_OF_BILE_ACIDS_AND_BILE_SALTS	1.95431	0.0253321	0.04526	1.59633	-2.19878	0.0139467	0.0249848	-1.85553	1.65815	0.0486433	0.0593644	1.31298
REACTOME_SYNTHESIS_OF_BILE_ACIDS_AND_BILE_SALTS_VIA_24_HYDROXYCHOLESTEROL	-1.33826	0.0904062	0.116709	-1.0438	-2.86196	0.00210516	0.00540406	-2.67671	1.40058	0.0806706	0.0911455	1.09328
REACTOME_SYNTHESIS_OF_BILE_ACIDS_AND_BILE_SALTS_VIA_7ALPHA_HYDROXYCHOLESTEROL	1.28111	0.100078	0.124633	0.999661	-2.27299	0.0115133	0.0213682	-1.9388	1.65815	0.0486433	0.0593644	1.31298
REACTOME_SYNTHESIS_OF_DNA	3.89143	4.9828e-05	0.000314434	4.30253	6.09125	5.60173e-10	5.56992e-08	9.25168	5.69093	6.31732e-09	1.84624e-07	8.19947
REACTOME_SYNTHESIS_OF_GLYCOSYLPHOSPHATIDYLINOSITOL_GPI	-2.18115	0.0145863	0.02926	-1.83605	0.922947	0.178017	0.202843	0.749537	1.10403	0.134791	0.140889	0.870339
REACTOME_SYNTHESIS_OF_PA	-1.89611	0.0289725	0.0487728	-1.53801	-3.02034	0.00126245	0.00336989	-2.89879	-3.60033	0.000158908	0.000404823	-3.79885
REACTOME_SYNTHESIS_OF_PC	1.90048	0.0286853	0.0487728	1.54234	-2.60959	0.00453255	0.00985977	-2.34366	-2.0358	0.020885	0.0284988	-1.68017
REACTOME_SYNTHESIS_OF_PE	1.02174	0.153452	0.174852	0.814027	0.834788	0.201918	0.224727	0.694824	1.04955	0.146962	0.151952	0.832794
REACTOME_SYNTHESIS_OF_PIPS_AT_THE_EARLY_ENDOSOME_MEMBRANE	2.29918	0.0107475	0.0228597	1.96869	1.65815	0.0486433	0.0686127	1.31298	-2.10301	0.0177322	0.0248029	-1.75124
REACTOME_SYNTHESIS_OF_PIPS_AT_THE_GOLGI_MEMBRANE	1.43871	0.0751162	0.100255	1.12427	1.6064	0.054093	0.0755049	1.26686	-1.81642	0.0346527	0.0439721	-1.46026
REACTOME_SYNTHESIS_OF_PIPS_AT_THE_LATE_ENDOSOME_MEMBRANE	1.37192	0.0850443	0.110855	1.07035	2.14126	0.0161264	0.0284334	1.79246	-1.86184	0.0313129	0.0401909	-1.50428
REACTOME_SYNTHESIS_OF_PIPS_AT_THE_PLASMA_MEMBRANE	1.20291	0.114506	0.138732	0.941172	-3.23907	0.000599602	0.00180961	-3.22214	-4.49943	3.40687e-06	1.52063e-05	-5.46764
REACTOME_SYNTHESIS_OF_SUBSTRATES_IN_N_GLYCAN_BIOSYTHESIS	2.33306	0.00982255	0.0212294	2.00778	2.79642	0.0025836	0.00624914	2.58777	2.51796	0.00590189	0.00939256	2.22901
REACTOME_SYNTHESIS_OF_VERY_LONG_CHAIN_FATTY_ACYL_COAS	1.47182	0.0705351	0.0954718	1.15159	1.00798	0.156732	0.183264	0.804843	-1.58297	0.0567142	0.067254	-1.24631
REACTOME_SYNTHESIS_SECRETION_AND_DEACYLATION_OF_GHRELIN	3.72363	9.81908e-05	0.000522126	4.00793	1.93154	0.0267081	0.0428096	1.57336	-1.27311	0.101489	0.110926	-0.99358
REACTOME_SYNTHESIS_SECRETION_AND_INACTIVATION_OF_GIP	2.10301	0.0177322	0.034337	1.75124	1.68669	0.045832	0.0663227	1.33883	0.892456	0.186074	0.186074	0.730314
REACTOME_SYNTHESIS_SECRETION_AND_INACTIVATION_OF_GLP1	2.03082	0.0211365	0.0392284	1.67497	1.93154	0.0267081	0.0428096	1.57336	1.21312	0.112542	0.120838	0.948685
REACTOME_TAK1_ACTIVATES_NFKB_BY_PHOSPHORYLATION_AND_ACTIVATION_OF_IKKS_COMPLEX	3.59346	0.000163159	0.000764452	3.78739	0.953873	0.170074	0.196127	0.769362	-2.27299	0.0115133	0.0167694	-1.9388
REACTOME_TANDEM_PORE_DOMAIN_POTASSIUM_CHANNELS	-1.28378	0.0996095	0.12428	-1.0017	-2.33306	0.00982255	0.0187496	-2.00778	-1.32721	0.0922204	0.10196	-1.03517
REACTOME_TCA_CYCLE_AND_RESPIRATORY_ELECTRON_TRANSPORT	4.06974	2.3533e-05	0.00017519	4.62832	4.26325	1.0074e-05	6.08068e-05	4.9968	4.98807	3.04931e-07	2.46149e-06	6.5158
REACTOME_TCR_SIGNALING	3.53371	0.000204888	0.00091365	3.68848	2.54434	0.00547427	0.0116068	2.26167	-4.65789	1.59736e-06	8.23255e-06	-5.7966
REACTOME_TELOMERE_MAINTENANCE	0.803346	0.210887	0.223214	0.675949	5.62586	9.22948e-09	2.94404e-07	8.03482	5.65688	7.70754e-09	2.06562e-07	8.11308
REACTOME_TERMINATION_OF_O_GLYCAN_BIOSYNTHESIS	1.17015	0.120971	0.144992	0.917318	0.998863	0.158931	0.185511	0.798792	-1.44766	0.0738559	0.0848772	-1.13162
REACTOME_TETRAHYDROBIOPTERIN_BH4_SYNTHESIS_RECYCLING_SALVAGE_AND_REGULATION	-1.58297	0.0567142	0.0817172	-1.24631	-2.24756	0.012302	0.0224587	-1.91002	-2.40515	0.00808296	0.0121973	-2.09243
REACTOME_TGF_BETA_RECEPTOR_SIGNALING_ACTIVATES_SMADS	3.14384	0.000833728	0.00284999	3.07898	3.44415	0.000286434	0.000974719	3.54298	-0.960559	0.168387	0.169653	-0.773691
REACTOME_TGF_BETA_RECEPTOR_SIGNALING_IN_EMT_EPITHELIAL_TO_MESENCHYMAL_TRANSITION	1.80436	0.0355876	0.0561027	1.4487	1.18267	0.11847	0.145642	0.926393	-2.08708	0.0184403	0.0255797	-1.73423
REACTOME_THE_ACTIVATION_OF_ARYLSULFATASES	-1.18519	0.117972	0.141905	-0.928223	-3.58683	0.000167361	0.000602859	-3.77635	-1.10643	0.13427	0.140889	-0.872021
REACTOME_THE_NLRP3_INFLAMMASOME	2.93604	0.00166215	0.00508513	2.77933	-2.09767	0.0179669	0.0311056	-1.74553	-3.19206	0.000706303	0.00154648	-3.15101
REACTOME_THE_ROLE_OF_NEF_IN_HIV1_REPLICATION_AND_DISEASE_PATHOGENESIS	2.87643	0.00201099	0.00599969	2.69659	1.72335	0.042413	0.062181	1.3725	-4.27848	9.4085e-06	3.52162e-05	-5.02648
REACTOME_THROMBIN_SIGNALLING_THROUGH_PROTEINASE_ACTIVATED_RECEPTORS_PARS	0.733492	0.231629	0.238756	0.635206	-2.79642	0.0025836	0.00624914	-2.58777	-3.80913	6.97279e-05	0.000197121	-4.15659
REACTOME_THROMBOXANE_SIGNALLING_THROUGH_TP_RECEPTOR	1.57966	0.0570926	0.082086	1.24342	0.780539	0.217537	0.237377	0.662467	-2.94312	0.00162462	0.00305757	-2.78925
REACTOME_TIE2_SIGNALING	-1.47792	0.0697141	0.0949359	-1.15668	-3.16982	0.000762661	0.00219306	-3.11767	-3.19206	0.000706303	0.00154648	-3.15101
REACTOME_TIGHT_JUNCTION_INTERACTIONS	1.22856	0.109619	0.134023	0.960114	2.78401	0.00268458	0.00642381	2.57112	2.68092	0.00367098	0.0061489	2.43522
REACTOME_TOLL_RECEPTOR_CASCADES	4.85192	6.11346e-07	1.51704e-05	6.21371	2.62929	0.00427812	0.00945987	2.36875	-3.64664	0.000132845	0.000346928	-3.87666
REACTOME_TRAF3_DEPENDENT_IRF_ACTIVATION_PATHWAY	1.99663	0.0229327	0.0419807	1.63954	-1.66522	0.0479342	0.0678984	-1.31935	-2.72496	0.00321548	0.00542663	-2.49275
REACTOME_TRAF6_MEDIATED_INDUCTION_OF_NFKB_AND_MAP_KINASES_UPON_TLR7_8_OR_9_ACTIVATION	2.63934	0.00415337	0.0104615	2.3816	1.82048	0.0343433	0.0524146	1.46416	-1.79639	0.0362165	0.0457831	-1.44109
REACTOME_TRAF6_MEDIATED_INDUCTION_OF_TAK1_COMPLEX	4.53414	2.89198e-06	4.22643e-05	5.5388	2.08708	0.0184403	0.0318428	1.73423	-1.01714	0.154543	0.159053	-0.810952
REACTOME_TRAF6_MEDIATED_IRF7_ACTIVATION	2.64952	0.00403028	0.0102672	2.39466	0.731465	0.232248	0.25017	0.634049	-2.18115	0.0145863	0.0208821	-1.83605
REACTOME_TRAF6_MEDIATED_IRF7_ACTIVATION_IN_TLR7_8_OR_9_SIGNALING	2.38287	0.00858922	0.0190556	2.06605	1.57635	0.0574721	0.0787449	1.24054	-1.22339	0.11059	0.119316	-0.956283
REACTOME_TRAF6_MEDIATED_NFKB_ACTIVATION	3.26404	0.00054918	0.00201106	3.26029	0.641717	0.260529	0.271891	0.584145	-2.44367	0.0072694	0.0112483	-2.1385
REACTOME_TRAFFICKING_AND_PROCESSING_OF_ENDOSOMAL_TLR	4.53343	2.90173e-06	4.22643e-05	5.53734	1.7767	0.0378084	0.0565438	1.42241	-2.79642	0.0025836	0.00449614	-2.58777
REACTOME_TRAFFICKING_OF_AMPA_RECEPTORS	-3.90703	4.67195e-05	0.000303903	-4.3305	-3.51258	0.000221889	0.000778354	-3.65386	-4.79144	8.27959e-07	5.43856e-06	-6.08199
REACTOME_TRAFFICKING_OF_GLUR2_CONTAINING_AMPA_RECEPTORS	-3.21512	0.000651945	0.00231113	-3.18579	-1.99663	0.0229327	0.0379381	-1.63954	-3.73655	9.32804e-05	0.000254056	-4.03021
REACTOME_TRANS_GOLGI_NETWORK_VESICLE_BUDDING	3.40173	0.000334801	0.0013513	3.47521	0.37662	0.353228	0.354817	0.451945	-3.26398	0.000549289	0.00124332	-3.2602
REACTOME_TRANSCRIPTION	0.38765	0.349137	0.349659	0.457004	6.10073	5.27931e-10	5.56992e-08	9.27742	5.90627	1.74971e-09	1.00651e-07	8.75704
REACTOME_TRANSCRIPTION_COUPLED_NER_TC_NER	-1.45066	0.0734376	0.0984064	-1.13408	4.38825	5.71323e-06	3.78996e-05	5.24312	4.31284	8.05855e-06	3.08528e-05	5.09374
REACTOME_TRANSCRIPTIONAL_ACTIVITY_OF_SMAD2_SMAD3_SMAD4_HETEROTRIMER	1.71963	0.0427501	0.0643653	1.36906	2.33306	0.00982255	0.0187496	2.00778	1.37761	0.0841626	0.0946124	1.07488
REACTOME_TRANSCRIPTIONAL_REGULATION_OF_WHITE_ADIPOCYTE_DIFFERENTIATION	0.753844	0.225471	0.233848	0.646909	0.480563	0.315413	0.318744	0.50112	-3.31708	0.000454815	0.00105808	-3.34217
REACTOME_TRANSFERRIN_ENDOCYTOSIS_AND_RECYCLING	2.33306	0.00982255	0.0212294	2.00778	1.13555	0.128072	0.155732	0.892545	-1.68308	0.0461797	0.0568757	-1.33555
REACTOME_TRANSLATION	4.90356	4.70581e-07	1.32257e-05	6.32737	5.25459	7.41786e-08	1.08043e-06	7.12972	5.39899	3.35095e-08	4.98919e-07	7.47483
REACTOME_TRANSLOCATION_OF_ZAP_70_TO_IMMUNOLOGICAL_SYNAPSE	3.54335	0.00019754	0.000894271	3.70434	2.61938	0.00440452	0.00964387	2.3561	-3.62349	0.000145326	0.000374493	-3.83766
REACTOME_TRANSMEMBRANE_TRANSPORT_OF_SMALL_MOLECULES	1.53417	0.0624937	0.0874129	1.20416	-4.07034	2.34728e-05	0.000114794	-4.62944	-2.93429	0.00167157	0.00311098	-2.77688
REACTOME_TRANSMISSION_ACROSS_CHEMICAL_SYNAPSES	-3.87228	5.39111e-05	0.000328368	-4.26832	-3.34925	0.000405158	0.00127444	-3.39238	-5.59521	1.10178e-08	2.57005e-07	-7.9579
REACTOME_TRANSPORT_OF_GLUCOSE_AND_OTHER_SUGARS_BILE_SALTS_AND_ORGANIC_ACIDS_METAL_IONS_AND_AMINE_COMPOUNDS	2.72496	0.00321548	0.00875761	2.49275	-2.01114	0.0221554	0.0370177	-1.65452	-1.19023	0.116978	0.125	-0.931897
REACTOME_TRANSPORT_OF_INORGANIC_CATIONS_ANIONS_AND_AMINO_ACIDS_OLIGOPEPTIDES	1.18267	0.11847	0.142248	0.926393	0.493729	0.310749	0.31498	0.50759	-2.23512	0.0127048	0.0183453	-1.89603
REACTOME_TRANSPORT_OF_MATURE_MRNA_DERIVED_FROM_AN_INTRONLESS_TRANSCRIPT	-2.14686	0.0159023	0.0314294	-1.79854	4.01911	2.92089e-05	0.000139786	4.53448	4.37111	6.1807e-06	2.46492e-05	5.20896
REACTOME_TRANSPORT_OF_MATURE_TRANSCRIPT_TO_CYTOPLASM	-2.70261	0.00343984	0.00907361	-2.46346	4.08273	2.22553e-05	0.0001147	4.65257	4.38088	5.91003e-06	2.37109e-05	5.22841
REACTOME_TRANSPORT_OF_ORGANIC_ANIONS	-1.22856	0.109619	0.134023	-0.960114	-1.65815	0.0486433	0.0686127	-1.31298	-1.69393	0.0451396	0.0557999	-1.34544
REACTOME_TRANSPORT_OF_RIBONUCLEOPROTEINS_INTO_THE_HOST_NUCLEUS	-1.9776	0.0239867	0.0434355	-1.62003	4.35933	6.52294e-06	4.0969e-05	5.18556	4.63881	1.75214e-06	8.89341e-06	5.75643
REACTOME_TRANSPORT_OF_VITAMINS_NUCLEOSIDES_AND_RELATED_MOLECULES	-1.6064	0.054093	0.0787877	-1.26686	0.809602	0.209084	0.230405	0.679678	-1.71223	0.0434274	0.0539822	-1.36224
REACTOME_TRANSPORT_TO_THE_GOLGI_AND_SUBSEQUENT_MODIFICATION	2.05599	0.0198916	0.0372273	1.70133	0.6555	0.256073	0.269584	0.591636	-1.50888	0.065665	0.076514	-1.18267
REACTOME_TRIF_MEDIATED_TLR3_SIGNALING	3.55654	0.000187887	0.000866692	3.7261	1.67233	0.0472293	0.0676145	1.32579	-2.00628	0.0224132	0.030215	-1.6495
REACTOME_TRIGLYCERIDE_BIOSYNTHESIS	-2.29256	0.0109368	0.0230429	-1.96111	-4.19702	1.35228e-05	7.42645e-05	-4.86893	-2.36116	0.00910892	0.0135622	-2.04053
REACTOME_TRNA_AMINOACYLATION	1.06596	0.14322	0.166017	0.843995	1.95893	0.0250606	0.0407539	1.60101	5.01265	2.68432e-07	2.29456e-06	6.57117
REACTOME_TRYPTOPHAN_CATABOLISM	1.67233	0.0472293	0.070633	1.32579	1.23633	0.108168	0.133222	0.965901	1.09683	0.136358	0.142084	0.865319
REACTOME_UNBLOCKING_OF_NMDA_RECEPTOR_GLUTAMATE_BINDING_AND_ACTIVATION	-2.70261	0.00343984	0.00907361	-2.46346	-1.88313	0.0298413	0.0468236	-1.52518	-2.65984	0.00390884	0.00649858	-2.40795
REACTOME_UNFOLDED_PROTEIN_RESPONSE	4.7244	1.15397e-06	2.49406e-05	5.93781	2.56243	0.00519715	0.0111605	2.28423	2.14686	0.0159023	0.0224307	1.79854
REACTOME_UNWINDING_OF_DNA	-2.12468	0.0168066	0.0330218	-1.77452	5.2841	6.31618e-08	9.4041e-07	7.19955	5.08544	1.83385e-07	1.83385e-06	6.73664
REACTOME_VEGF_LIGAND_RECEPTOR_INTERACTIONS	1.63719	0.0507956	0.0749626	1.29417	-2.37557	0.00876097	0.016916	-2.05745	-3.76256	8.40919e-05	0.000232817	-4.07525
REACTOME_VIF_MEDIATED_DEGRADATION_OF_APOBEC3G	4.95708	3.57796e-07	1.14154e-05	6.44636	4.91559	4.42577e-07	4.32095e-06	6.35401	3.44845	0.000281912	0.000688634	3.54989
REACTOME_VIRAL_MESSENGER_RNA_SYNTHESIS	0.73552	0.231011	0.238486	0.636367	1.78061	0.0374878	0.0561898	1.42611	2.52665	0.00575776	0.009185	2.23975
REACTOME_VITAMIN_B5_PANTOTHENATE_METABOLISM	-1.86606	0.0310163	0.0509336	-1.50841	1.0754	0.141097	0.167615	0.850483	1.56977	0.0582339	0.0688125	1.23482
REACTOME_VOLTAGE_GATED_POTASSIUM_CHANNELS	-3.06897	0.00107399	0.00352731	-2.969	-2.21073	0.0135272	0.0242982	-1.86879	-2.16957	0.0150196	0.0213654	-1.82334
REACTOME_XENOBIOTICS	1.21056	0.113032	0.137443	0.946799	0.918565	0.179162	0.20311	0.746755	2.47584	0.00664608	0.0105021	2.17743
REACTOME_YAP1_AND_WWTR1_TAZ_STIMULATED_GENE_EXPRESSION	2.08183	0.0186789	0.0357568	1.72865	0.953873	0.170074	0.196127	0.769362	-1.47487	0.0701242	0.0810055	-1.15413
REACTOME_ZINC_TRANSPORTERS	3.15362	0.000806302	0.00279908	3.0935	1.87456	0.0304264	0.0476302	1.51675	3.0227	0.00125266	0.00251283	2.90217

## Sheet: KEGG comb.
	MESENCHYMAL vs. STAGE 1				11q-LOH vs STAGE 1				MYCNA vs STAGE 1
KEGG pathway name	NES	p-value	FDR	logP(+-)	NES	p-value	FDR	logP(+-)	NES	p-value	FDR	logP(+-)
KEGG_CELL_CYCLE	1.01256	0.155636	0.182705	0.80789	6.04972	7.25474e-10	1.34938e-07	9.13938	6.05882	6.8561e-10	7.32265e-08	9.16392
KEGG_SPLICEOSOME	-2.08183	0.0186789	0.0399876	-1.72865	4.95325	3.64928e-07	1.69691e-05	6.43779	5.58715	1.15411e-08	3.06663e-07	7.93775
KEGG_RIBOSOME	3.86583	5.53555e-05	0.000332133	4.25684	4.20319	1.31591e-05	0.000104802	4.88077	5.55976	1.3507e-08	3.14039e-07	7.86944
KEGG_HOMOLOGOUS_RECOMBINATION	-1.90486	0.0283992	0.051284	-1.54669	4.34017	7.11859e-06	6.96873e-05	5.14761	5.4914	1.99384e-08	3.87878e-07	7.70031
KEGG_RNA_DEGRADATION	0.909828	0.181457	0.202101	0.741227	4.24262	1.10462e-05	0.00010273	4.95679	5.48347	2.08536e-08	3.87878e-07	7.68082
KEGG_DNA_REPLICATION	0.780539	0.217537	0.229897	0.662467	5.86626	2.22863e-09	1.49823e-07	8.65196	5.26203	7.12369e-08	9.16866e-07	7.14729
KEGG_SYSTEMIC_LUPUS_ERYTHEMATOSUS	5.19161	1.0424e-07	1.79085e-06	6.98197	5.85282	2.4165e-09	1.49823e-07	8.61681	5.0721	1.96722e-07	1.95575e-06	6.70615
KEGG_PYRIMIDINE_METABOLISM	0.689238	0.245337	0.253515	0.610237	4.20068	1.33058e-05	0.000104802	4.87596	5.01046	2.71506e-07	2.19566e-06	6.56622
KEGG_NUCLEOTIDE_EXCISION_REPAIR	1.46574	0.0713598	0.100552	1.14655	4.67648	1.45923e-06	2.2832e-05	5.83588	4.99754	2.90331e-07	2.25007e-06	6.53711
KEGG_MISMATCH_REPAIR	-2.09236	0.018203	0.0398324	-1.73986	4.64281	1.71854e-06	2.2832e-05	5.76484	4.85921	5.89288e-07	3.91455e-06	6.22967
KEGG_BASE_EXCISION_REPAIR	0.6555	0.256073	0.263147	0.591636	4.75441	9.95116e-07	2.2832e-05	6.00213	4.81284	7.43999e-07	4.32449e-06	6.12843
KEGG_OXIDATIVE_PHOSPHORYLATION	4.34726	6.8923e-06	5.34153e-05	5.16164	4.12711	1.83677e-05	0.000136656	4.73595	4.62149	1.90493e-06	9.08505e-06	5.72012
KEGG_AMINOACYL_TRNA_BIOSYNTHESIS	-1.55997	0.059384	0.0883633	-1.22633	1.58629	0.0563368	0.0787867	1.24921	4.58378	2.28321e-06	1.06169e-05	5.64145
KEGG_NON_HOMOLOGOUS_END_JOINING	0.888135	0.187234	0.207295	0.727615	2.24756	0.012302	0.0220017	1.91002	4.35641	6.61054e-06	2.50931e-05	5.17976
KEGG_ONE_CARBON_POOL_BY_FOLATE	1.02865	0.151821	0.179864	0.818668	2.58095	0.00492645	0.0105324	2.30747	4.24352	1.1002e-05	3.93532e-05	4.95853
KEGG_GLYCINE_SERINE_AND_THREONINE_METABOLISM	0.931737	0.175736	0.199311	0.755139	0.764079	0.22241	0.24192	0.652846	4.21895	1.22722e-05	4.22709e-05	4.91108
KEGG_PURINE_METABOLISM	1.06596	0.14322	0.174111	0.843995	1.39768	0.081104	0.104759	1.09096	4.17951	1.46071e-05	4.76653e-05	4.83544
KEGG_CYSTEINE_AND_METHIONINE_METABOLISM	1.35499	0.08771	0.119081	1.05695	2.81609	0.00243063	0.00636756	2.61428	4.12777	1.83147e-05	5.58448e-05	4.7372
KEGG_P53_SIGNALING_PATHWAY	3.51133	0.000222936	0.00103665	3.65182	3.1215	0.000899665	0.00298817	3.04592	3.83647	6.24075e-05	0.00016349	4.20476
KEGG_VALINE_LEUCINE_AND_ISOLEUCINE_BIOSYNTHESIS	1.11609	0.132193	0.162833	0.878792	1.31897	0.0935899	0.11762	1.02877	3.78002	7.84078e-05	0.000191893	4.10564
KEGG_OLFACTORY_TRANSDUCTION	0.591039	0.277247	0.280261	0.557133	2.95158	0.00158078	0.0046219	2.80113	3.71354	0.000102189	0.000246845	3.9906
KEGG_GLYOXYLATE_AND_DICARBOXYLATE_METABOLISM	1.70487	0.0441091	0.0695279	1.35547	1.25988	0.103857	0.12793	0.983565	3.58917	0.000165864	0.000385633	3.78025
KEGG_LYSINE_DEGRADATION	-3.37531	0.000368657	0.00149066	-3.43338	-1.77281	0.0381302	0.0576602	-1.41873	3.58312	0.000169756	0.000389811	3.77017
KEGG_RNA_POLYMERASE	-1.8451	0.0325112	0.0565148	-1.48797	2.19287	0.0141585	0.0243842	1.84898	3.56913	0.000179086	0.000406219	3.74694
KEGG_HUNTINGTONS_DISEASE	1.42982	0.0763846	0.106026	1.11699	2.83175	0.00231467	0.0061504	2.63551	3.46146	0.000268629	0.000580988	3.57085
KEGG_ALANINE_ASPARTATE_AND_GLUTAMATE_METABOLISM	1.71223	0.0434274	0.0690385	1.36224	-1.54057	0.0617105	0.0843981	-1.20964	3.45328	0.000276911	0.000592016	3.55766
KEGG_MATURITY_ONSET_DIABETES_OF_THE_YOUNG	3.03775	0.00119177	0.00418243	2.92381	2.34	0.00964194	0.0181152	2.01584	3.42706	0.000305081	0.00064483	3.51558
KEGG_PROTEASOME	4.53469	2.88437e-06	2.55473e-05	5.53995	4.86135	5.82937e-07	2.16852e-05	6.23438	3.12717	0.000882475	0.00176495	3.0543
KEGG_PENTOSE_AND_GLUCURONATE_INTERCONVERSIONS	1.32445	0.0926761	0.124013	1.03303	1.10643	0.13427	0.159071	0.872021	2.98167	0.00143341	0.00272055	2.84363
KEGG_PROTEIN_EXPORT	3.94582	3.9763e-05	0.000254008	4.40052	3.33642	0.000424324	0.00170484	3.3723	2.86196	0.00210516	0.003765	2.67671
KEGG_BASAL_TRANSCRIPTION_FACTORS	-1.53098	0.0628868	0.0921019	-1.20144	3.71154	0.000102999	0.000491228	3.98717	2.79642	0.0025836	0.00444953	2.58777
KEGG_GLYCOLYSIS_GLUCONEOGENESIS	2.01114	0.0221554	0.0433779	1.65452	0.77024	0.220579	0.24192	0.656436	2.79642	0.0025836	0.00444953	2.58777
KEGG_PORPHYRIN_AND_CHLOROPHYLL_METABOLISM	1.98707	0.0234573	0.0445209	1.62972	1.17264	0.120469	0.146453	0.919124	2.78401	0.00268458	0.00458102	2.57112
KEGG_PENTOSE_PHOSPHATE_PATHWAY	1.50263	0.0664673	0.0950994	1.17739	1.21568	0.112053	0.137117	0.950577	2.70261	0.00343984	0.00561238	2.46346
KEGG_BUTANOATE_METABOLISM	-1.59966	0.0548369	0.0822554	-1.26093	-2.64952	0.00403028	0.00903171	-2.39466	2.60959	0.00453255	0.00714453	2.34366
KEGG_OOCYTE_MEIOSIS	0.508828	0.305436	0.305436	0.515079	3.37137	0.000373977	0.00154577	3.42716	2.60959	0.00453255	0.00714453	2.34366
KEGG_BIOSYNTHESIS_OF_UNSATURATED_FATTY_ACIDS	0.843242	0.199546	0.218327	0.699956	2.53545	0.00561522	0.0114773	2.25063	2.59992	0.00466222	0.00722645	2.33141
KEGG_RETINOL_METABOLISM	3.12425	0.000891296	0.00331562	3.04998	1.36061	0.086818	0.111367	1.06139	2.59038	0.00479353	0.00736856	2.31934
KEGG_N_GLYCAN_BIOSYNTHESIS	2.1357	0.0163518	0.0370907	1.78643	1.61999	0.0526173	0.0741426	1.27887	2.57163	0.00506099	0.00759149	2.29576
KEGG_ARGININE_AND_PROLINE_METABOLISM	2.68092	0.00367098	0.0111935	2.43522	1.67949	0.0465285	0.0670876	1.33228	2.49242	0.00634371	0.00943945	2.19766
KEGG_DRUG_METABOLISM_OTHER_ENZYMES	0.768185	0.221189	0.232436	0.655237	1.34382	0.0895041	0.114026	1.04816	2.42034	0.00775298	0.011266	2.11053
KEGG_PARKINSONS_DISEASE	0.938354	0.174031	0.198588	0.759372	3.14779	0.000822539	0.00278168	3.08484	2.28599	0.0111275	0.0157994	1.9536
KEGG_FRUCTOSE_AND_MANNOSE_METABOLISM	2.07661	0.0189189	0.0399876	1.7231	0.892456	0.186074	0.214968	0.730314	2.27299	0.0115133	0.0162233	1.9388
KEGG_STEROID_BIOSYNTHESIS	1.6064	0.054093	0.0822554	1.26686	1.40058	0.0806706	0.104759	1.09328	2.16384	0.0152382	0.0205385	1.81707
KEGG_PROGESTERONE_MEDIATED_OOCYTE_MATURATION	-1.62684	0.0518856	0.0804226	-1.28495	3.29643	0.000489608	0.00178563	3.31015	2.14686	0.0159023	0.0212794	1.79854
KEGG_GLUTATHIONE_METABOLISM	2.63934	0.00415337	0.0124601	2.3816	1.50888	0.065665	0.0884045	1.18267	2.1357	0.0163518	0.0217245	1.78643
KEGG_CITRATE_CYCLE_TCA_CYCLE	0.998863	0.158931	0.184757	0.798792	0.996589	0.159482	0.186564	0.797289	1.93606	0.0264305	0.0343781	1.57789
KEGG_SELENOAMINO_ACID_METABOLISM	-2.27946	0.0113197	0.0277035	-1.94616	1.43278	0.0759609	0.100204	1.11941	1.89611	0.0289725	0.0371647	1.53801
KEGG_ASCORBATE_AND_ALDARATE_METABOLISM	-2.07661	0.0189189	0.0399876	-1.7231	-1.46877	0.070947	0.0942582	-1.14907	1.8451	0.0325112	0.0411366	1.48797
KEGG_RIBOFLAVIN_METABOLISM	1.94059	0.0261541	0.0476927	1.58246	1.32171	0.0931326	0.11762	1.0309	1.7767	0.0378084	0.0468824	1.42241
KEGG_MELANOMA	3.74438	9.04185e-05	0.000467162	4.04374	3.61944	0.000147618	0.000669682	3.83086	1.71963	0.0427501	0.052659	1.36906
KEGG_PYRUVATE_METABOLISM	-1.65815	0.0486433	0.0760308	-1.31298	-2.42804	0.00759026	0.0148609	-2.11974	1.66522	0.0479342	0.0586563	1.31935
KEGG_GALACTOSE_METABOLISM	1.45667	0.0726037	0.101536	1.13904	0.764079	0.22241	0.24192	0.652846	1.57966	0.0570926	0.068956	1.24342
KEGG_TERPENOID_BACKBONE_BIOSYNTHESIS	0.830572	0.203108	0.220924	0.692274	0.883821	0.188396	0.216307	0.724927	1.53098	0.0628868	0.0749696	1.20144
KEGG_HEDGEHOG_SIGNALING_PATHWAY	2.27299	0.0115133	0.0278114	1.9388	1.10884	0.13375	0.159071	0.873708	1.5278	0.0632808	0.0749696	1.19873
KEGG_BLADDER_CANCER	2.29918	0.0107475	0.0266537	1.96869	2.62929	0.00427812	0.00947298	2.36875	1.45066	0.0734376	0.0864518	1.13408
KEGG_TYROSINE_METABOLISM	1.31078	0.0949667	0.124122	1.02243	2.55333	0.00533491	0.0110255	2.27287	1.42982	0.0763846	0.0893555	1.11699
KEGG_UBIQUITIN_MEDIATED_PROTEOLYSIS	-2.30585	0.0105596	0.0265416	-1.97635	2.31935	0.0101882	0.0187624	1.9919	1.3948	0.0815383	0.0941996	1.08864
KEGG_LINOLEIC_ACID_METABOLISM	1.51201	0.0652653	0.0941034	1.18532	0.792954	0.213902	0.23816	0.669784	1.33826	0.0904062	0.103163	1.0438
KEGG_BASAL_CELL_CARCINOMA	1.31623	0.094048	0.124063	1.02665	0.409782	0.340983	0.342826	0.467267	1.30534	0.0958888	0.108752	1.01823
KEGG_ALZHEIMERS_DISEASE	3.16516	0.000774987	0.00300307	3.11071	1.88313	0.0298413	0.04744	1.52518	1.25461	0.104809	0.117437	0.9796
KEGG_VALINE_LEUCINE_AND_ISOLEUCINE_DEGRADATION	-2.83017	0.00232615	0.00745971	-2.63336	-2.86028	0.00211635	0.00578884	-2.67441	1.22597	0.110104	0.121901	0.958196
KEGG_PROPANOATE_METABOLISM	-1.7612	0.039102	0.0648995	-1.4078	-2.93429	0.00167157	0.00471079	-2.77688	1.16516	0.121977	0.134247	0.913723
KEGG_SULFUR_METABOLISM	1.138	0.12756	0.160312	0.894285	0.687242	0.245965	0.261426	0.609127	1.12579	0.130127	0.142374	0.885633
KEGG_STEROID_HORMONE_BIOSYNTHESIS	0.799184	0.212092	0.226719	0.673476	-2.67031	0.00378908	0.00892112	-2.42147	1.12093	0.131158	0.142663	0.882204
KEGG_RENIN_ANGIOTENSIN_SYSTEM	1.78061	0.0374878	0.0633885	1.42611	-2.23512	0.0127048	0.0225057	-1.89603	1.11367	0.132711	0.143513	0.877093
KEGG_GLYCOSYLPHOSPHATIDYLINOSITOL_GPI_ANCHOR_BIOSYNTHESIS	-2.56243	0.00519715	0.0148718	-2.28423	-1.73082	0.0417421	0.0621122	-1.37943	1.10884	0.13375	0.1438	0.873708
KEGG_ARACHIDONIC_ACID_METABOLISM	4.15224	1.64621e-05	0.000109355	4.78352	1.55997	0.059384	0.0824285	1.22633	1.0849	0.138984	0.148569	0.857035
KEGG_HISTIDINE_METABOLISM	0.942776	0.172898	0.198512	0.762211	0.618228	0.268212	0.280939	0.571521	1.07068	0.142157	0.151093	0.847231
KEGG_METABOLISM_OF_XENOBIOTICS_BY_CYTOCHROME_P450	1.60978	0.0537226	0.0822554	1.26984	-3.26398	0.000549289	0.00196476	-3.2602	1.04489	0.148038	0.156449	0.829628
KEGG_DRUG_METABOLISM_CYTOCHROME_P450	1.78061	0.0374878	0.0633885	1.42611	-2.67031	0.00378908	0.00892112	-2.42147	1.02865	0.151821	0.159453	0.818668
KEGG_NITROGEN_METABOLISM	1.22856	0.109619	0.139652	0.960114	-2.60959	0.00453255	0.00980296	-2.34366	0.998863	0.158931	0.164228	0.798792
KEGG_AMINO_SUGAR_AND_NUCLEOTIDE_SUGAR_METABOLISM	2.80343	0.00252811	0.00796996	2.5972	0.947208	0.171766	0.199679	0.765062	0.989785	0.16114	0.165591	0.792798
KEGG_TRYPTOPHAN_METABOLISM	1.21825	0.111565	0.141163	0.952473	-1.79639	0.0362165	0.0552153	-1.44109	0.976244	0.164472	0.167168	0.783909
KEGG_PHENYLALANINE_METABOLISM	1.89177	0.0292609	0.0518336	1.53371	1.42098	0.077661	0.101725	1.1098	0.967266	0.166705	0.168517	0.77805
KEGG_GLYCOSPHINGOLIPID_BIOSYNTHESIS_LACTO_AND_NEOLACTO_SERIES	-2.45159	0.00711126	0.0186295	-2.14805	-3.51258	0.000221889	0.000959799	-3.65386	0.907649	0.182032	0.183016	0.739853
KEGG_LIMONENE_AND_PINENE_DEGRADATION	-2.88999	0.00192628	0.00639801	-2.71528	-2.50084	0.00619487	0.0123897	-2.20797	0.875219	0.190727	0.190727	0.719587
KEGG_PRIMARY_BILE_ACID_BIOSYNTHESIS	2.02586	0.0213893	0.0427786	1.6698	-2.93429	0.00167157	0.00471079	-2.77688	-0.980748	0.163359	0.166949	-0.786858
KEGG_CYTOSOLIC_DNA_SENSING_PATHWAY	4.72724	1.13793e-06	1.32285e-05	5.94388	2.75981	0.00289176	0.00736804	2.53884	-1.02174	0.153452	0.159453	-0.814027
KEGG_O_GLYCAN_BIOSYNTHESIS	3.77207	8.09481e-05	0.000442834	4.09179	0.866648	0.193067	0.22031	0.714291	-1.02404	0.152908	0.159453	-0.815571
KEGG_TAURINE_AND_HYPOTAURINE_METABOLISM	-2.00628	0.0224132	0.0434256	-1.6495	-1.84096	0.0328137	0.0512886	-1.48394	-1.22856	0.109619	0.121901	-0.960114
KEGG_FOLATE_BIOSYNTHESIS	-1.41805	0.0780883	0.107588	-1.10741	-1.51831	0.0644686	0.0875268	-1.19065	-1.27844	0.100548	0.113345	-0.997628
KEGG_STARCH_AND_SUCROSE_METABOLISM	1.02865	0.151821	0.179864	0.818668	-2.98167	0.00143341	0.00437072	-2.84363	-1.37192	0.0850443	0.0976435	-1.07035
KEGG_FATTY_ACID_METABOLISM	-1.74591	0.0404133	0.0653641	-1.39348	-2.94972	0.00159033	0.0046219	-2.79851	-1.39768	0.081104	0.0941996	-1.09096
KEGG_SPHINGOLIPID_METABOLISM	3.81757	6.73858e-05	0.00039168	4.17143	1.27577	0.101018	0.125847	0.995601	-1.54378	0.0613203	0.0735844	-1.2124
KEGG_ALPHA_LINOLENIC_ACID_METABOLISM	1.30805	0.0954274	0.124122	1.02033	2.00144	0.0226724	0.0369917	1.6445	-1.59966	0.0548369	0.0666645	-1.26093
KEGG_CHRONIC_MYELOID_LEUKEMIA	1.39192	0.0819736	0.112111	1.08633	2.16957	0.0150196	0.0256297	1.82334	-1.81239	0.0349632	0.0436453	-1.45639
KEGG_BETA_ALANINE_METABOLISM	-3.21512	0.000651945	0.00258004	-3.18579	-3.75059	8.82084e-05	0.000443426	-4.05449	-1.83683	0.0331173	0.0416204	-1.47994
KEGG_NON_SMALL_CELL_LUNG_CANCER	1.12093	0.131158	0.162833	0.882204	2.77388	0.00276959	0.00715477	2.55758	-1.87456	0.0304264	0.0387624	-1.51675
KEGG_SMALL_CELL_LUNG_CANCER	2.56243	0.00519715	0.0148718	2.28423	-1.94972	0.0256049	0.0410561	-1.59168	-1.90486	0.0283992	0.0366823	-1.54669
KEGG_PROXIMAL_TUBULE_BICARBONATE_RECLAMATION	1.74591	0.0404133	0.0653641	1.39348	1.14537	0.126029	0.152217	0.89953	-1.93606	0.0264305	0.0343781	-1.57789
KEGG_PANCREATIC_CANCER	2.05599	0.0198916	0.0411093	1.70133	2.22284	0.0131132	0.02301	1.88229	-2.04081	0.0206347	0.0272203	-1.6854
KEGG_NEUROACTIVE_LIGAND_RECEPTOR_INTERACTION	1.75736	0.0394282	0.0648995	1.40419	-4.19702	1.35228e-05	0.000104802	-4.86893	-2.20474	0.0137363	0.0186492	-1.86213
KEGG_VIBRIO_CHOLERAE_INFECTION	1.53098	0.0628868	0.0921019	1.20144	1.50575	0.0660657	0.0884045	1.18002	-2.21073	0.0135272	0.0185004	-1.86879
KEGG_COMPLEMENT_AND_COAGULATION_CASCADES	5.18865	1.05911e-07	1.79085e-06	6.97506	0.824262	0.204895	0.229581	0.688468	-2.23512	0.0127048	0.0175044	-1.89603
KEGG_PPAR_SIGNALING_PATHWAY	2.93603	0.00166219	0.00562124	2.77932	-2.46768	0.0067996	0.0134545	-2.16752	-2.23512	0.0127048	0.0175044	-1.89603
KEGG_GLYCOSAMINOGLYCAN_BIOSYNTHESIS_CHONDROITIN_SULFATE	1.87884	0.0301333	0.0528754	1.52095	0.85811	0.195416	0.221614	0.70904	-2.26019	0.0119048	0.0166489	-1.92428
KEGG_REGULATION_OF_AUTOPHAGY	-1.89611	0.0289725	0.0518162	-1.53801	-1.98707	0.0234573	0.0379396	-1.62972	-2.35405	0.00928512	0.0132849	-2.03221
KEGG_GLIOMA	0.784671	0.216323	0.229897	0.664897	1.27311	0.101489	0.125847	0.99358	-2.36116	0.00910892	0.0131338	-2.04053
KEGG_PRION_DISEASES	2.49242	0.00634371	0.0173519	2.19766	-1.64414	0.050074	0.0716444	-1.30039	-2.45159	0.00711126	0.0104149	-2.14805
KEGG_RIG_I_LIKE_RECEPTOR_SIGNALING_PATHWAY	4.57267	2.4077e-06	2.29689e-05	5.6184	2.03082	0.0211365	0.0347911	1.67497	-2.4596	0.00695466	0.0102664	-2.15772
KEGG_GLYCEROLIPID_METABOLISM	-1.95893	0.0250606	0.0461512	-1.60101	-4.65351	1.63168e-06	2.2832e-05	-5.78737	-2.57163	0.00506099	0.00759149	-2.29576
KEGG_TGF_BETA_SIGNALING_PATHWAY	3.46427	0.00026584	0.00116222	3.57538	0.567907	0.285049	0.296196	0.54508	-2.58095	0.00492645	0.00751082	-2.30747
KEGG_GLYCOSPHINGOLIPID_BIOSYNTHESIS_GLOBO_SERIES	1.33272	0.0913116	0.123072	1.03947	-1.75736	0.0394282	0.0591423	-1.40419	-2.59992	0.00466222	0.00722645	-2.33141
KEGG_OTHER_GLYCAN_DEGRADATION	2.86196	0.00210516	0.00686948	2.67671	-1.82862	0.033728	0.0522784	-1.47201	-2.64952	0.00403028	0.00646234	-2.39466
KEGG_PEROXISOME	-2.1357	0.0163518	0.0370907	-1.78643	-2.08183	0.0186789	0.0312998	-1.72865	-2.69169	0.00355457	0.00574913	-2.44921
KEGG_CIRCADIAN_RHYTHM_MAMMAL	3.4614	0.000268686	0.00116222	3.57076	-1.71592	0.0430882	0.0636064	-1.36564	-2.70261	0.00343984	0.00561238	-2.46346
KEGG_PRIMARY_IMMUNODEFICIENCY	4.56734	2.46978e-06	2.29689e-05	5.60734	4.59892	2.12345e-06	2.63307e-05	5.67296	-2.70261	0.00343984	0.00561238	-2.46346
KEGG_PROSTATE_CANCER	0.922947	0.178017	0.199465	0.749537	0.73755	0.230394	0.247707	0.637529	-2.7137	0.00332681	0.00557466	-2.47797
KEGG_NICOTINATE_AND_NICOTINAMIDE_METABOLISM	2.18115	0.0145863	0.0343425	1.83605	0.616279	0.268855	0.280939	0.570482	-2.72496	0.00321548	0.00543708	-2.49275
KEGG_GLYCOSAMINOGLYCAN_DEGRADATION	1.78454	0.0371683	0.0633885	1.42983	-1.80837	0.0352748	0.0542241	-1.45254	-2.82191	0.00238691	0.00418835	-2.62216
KEGG_THYROID_CANCER	-1.51516	0.0648665	0.0941034	-1.18798	-2.64952	0.00403028	0.00903171	-2.39466	-2.84835	0.0021973	0.00389235	-2.65811
KEGG_COLORECTAL_CANCER	-1.98707	0.0234573	0.0445209	-1.62972	0.675299	0.249743	0.263933	0.602507	-2.87572	0.00201555	0.00363974	-2.69561
KEGG_PANTOTHENATE_AND_COA_BIOSYNTHESIS	-2.46768	0.0067996	0.0180675	-2.16752	-3.51258	0.000221889	0.000959799	-3.65386	-2.88999	0.00192628	0.00351263	-2.71528
KEGG_GLYCOSPHINGOLIPID_BIOSYNTHESIS_GANGLIO_SERIES	0.824262	0.204895	0.221573	0.688468	-2.55333	0.00533491	0.0110255	-2.27287	-2.90444	0.00183956	0.0033877	-2.73529
KEGG_TYPE_II_DIABETES_MELLITUS	-2.12468	0.0168066	0.0376631	-1.77452	-3.81391	6.83916e-05	0.000374142	-4.165	-2.93644	0.00166002	0.00308764	-2.77989
KEGG_MTOR_SIGNALING_PATHWAY	0.585241	0.279193	0.280702	0.554096	0.522087	0.300805	0.307416	0.521715	-2.9655	0.00151094	0.00283874	-2.82075
KEGG_GLYCOSAMINOGLYCAN_BIOSYNTHESIS_HEPARAN_SULFATE	-2.01114	0.0221554	0.0433779	-1.65452	-3.75059	8.82084e-05	0.000443426	-4.05449	-3.00015	0.00134923	0.00258718	-2.86992
KEGG_ASTHMA	4.61778	1.93929e-06	2.00394e-05	5.71236	2.05599	0.0198916	0.0330343	1.70133	-3.05056	0.00114207	0.00221276	-2.94231
KEGG_INSULIN_SIGNALING_PATHWAY	-2.35405	0.00928512	0.0239866	-2.03221	-2.33306	0.00982255	0.0182699	-2.00778	-3.06753	0.00107918	0.00211292	-2.96691
KEGG_GLYCOSAMINOGLYCAN_BIOSYNTHESIS_KERATAN_SULFATE	0.875219	0.190727	0.209913	0.719587	-1.69393	0.0451396	0.0655935	-1.34544	-3.08792	0.00100783	0.00199421	-2.99661
KEGG_NOTCH_SIGNALING_PATHWAY	-1.71963	0.0427501	0.0685475	-1.36906	-3.21512	0.000651945	0.00228796	-3.18579	-3.16637	0.000771779	0.00156034	-3.11251
KEGG_ABC_TRANSPORTERS	0.727416	0.233486	0.243979	0.63174	-3.84529	6.02052e-05	0.000339338	-4.22037	-3.16982	0.000762661	0.00155885	-3.11767
KEGG_AMYOTROPHIC_LATERAL_SCLEROSIS_ALS	-1.96822	0.0245212	0.0456094	-1.61046	-2.67031	0.00378908	0.00892112	-2.42147	-3.16982	0.000762661	0.00155885	-3.11767
KEGG_TASTE_TRANSDUCTION	-3.4751	0.000255336	0.00115835	-3.59289	-3.96975	3.59748e-05	0.000230735	-4.444	-3.34832	0.000406512	0.000849564	-3.39093
KEGG_ENDOMETRIAL_CANCER	-1.77281	0.0381302	0.0638938	-1.41873	0.853852	0.196593	0.221614	0.706431	-3.46952	0.000260699	0.000570471	-3.58386
KEGG_AUTOIMMUNE_THYROID_DISEASE	5.33399	4.80392e-08	1.46685e-06	7.3184	3.43282	0.000298669	0.00126256	3.52481	-3.48592	0.00024522	0.000542987	-3.61044
KEGG_CARDIAC_MUSCLE_CONTRACTION	-3.75059	8.82084e-05	0.000467162	-4.05449	-2.69169	0.00355457	0.00869935	-2.44921	-3.55149	0.000191529	0.000429209	-3.71777
KEGG_ETHER_LIPID_METABOLISM	0.947208	0.171766	0.198438	0.765062	-2.14686	0.0159023	0.0268894	-1.79854	-3.59982	0.000159219	0.000374869	-3.79801
KEGG_APOPTOSIS	3.73568	9.36041e-05	0.00047055	4.02871	0.323616	0.373114	0.373114	0.428158	-3.69873	0.000108342	0.000258354	-3.9652
KEGG_NOD_LIKE_RECEPTOR_SIGNALING_PATHWAY	5.30695	5.57359e-08	1.46685e-06	7.25387	1.86184	0.0313129	0.0493577	1.50428	-3.81461	6.81977e-05	0.00016913	-4.16623
KEGG_ADIPOCYTOKINE_SIGNALING_PATHWAY	2.11922	0.017036	0.0377227	1.76863	0.554483	0.289624	0.297625	0.538165	-3.82205	6.61745e-05	0.00016633	-4.17931
KEGG_INTESTINAL_IMMUNE_NETWORK_FOR_IGA_PRODUCTION	5.40014	3.32948e-08	1.46685e-06	7.47762	3.7385	9.25622e-05	0.000453068	4.03357	-3.82961	6.41742e-05	0.000163512	-4.19264
KEGG_PATHOGENIC_ESCHERICHIA_COLI_INFECTION	2.77609	0.00275085	0.00852765	2.56053	0.753844	0.225471	0.243824	0.646909	-3.82985	6.41119e-05	0.000163512	-4.19306
KEGG_ERBB_SIGNALING_PATHWAY	-2.26019	0.0119048	0.0283885	-1.92428	-2.27299	0.0115133	0.0209949	-1.9388	-3.87696	5.28851e-05	0.000140523	-4.27667
KEGG_PATHWAYS_IN_CANCER	3.14707	0.000824569	0.00313	3.08377	0.56023	0.287661	0.29725	0.541119	-3.88768	5.06037e-05	0.00013641	-4.29582
KEGG_TYPE_I_DIABETES_MELLITUS	5.28431	6.30905e-08	1.46685e-06	7.20004	2.65984	0.00390884	0.00897587	2.40795	-3.90968	4.62096e-05	0.000126397	-4.33527
KEGG_VASOPRESSIN_REGULATED_WATER_REABSORPTION	-3.39148	0.000347575	0.00143664	-3.45895	-3.32147	0.000447718	0.00170484	-3.349	-3.95177	3.8787e-05	0.000107677	-4.41131
KEGG_MELANOGENESIS	-2.31257	0.0103731	0.0264302	-1.98409	-4.65351	1.63168e-06	2.2832e-05	-5.78737	-4.0017	3.14439e-05	8.86145e-05	-4.50246
KEGG_GRAFT_VERSUS_HOST_DISEASE	5.15305	1.28142e-07	1.9862e-06	6.89231	3.02643	0.00123731	0.00390066	2.90752	-4.06527	2.39887e-05	6.86445e-05	-4.61999
KEGG_LONG_TERM_DEPRESSION	0.799184	0.212092	0.226719	0.673476	-2.61938	0.00440452	0.00963812	-2.3561	-4.08177	2.23472e-05	6.49465e-05	-4.65078
KEGG_ALLOGRAFT_REJECTION	5.4939	1.96575e-08	1.21877e-06	7.70647	3.06744	0.00107951	0.00346187	2.96677	-4.09478	2.11288e-05	6.23802e-05	-4.67513
KEGG_VEGF_SIGNALING_PATHWAY	2.04081	0.0206347	0.041718	1.6854	-2.19878	0.0139467	0.0242438	-1.85553	-4.11791	1.91163e-05	5.73488e-05	-4.7186
KEGG_NEUROTROPHIN_SIGNALING_PATHWAY	1.01027	0.156183	0.182705	0.806365	-2.98167	0.00143341	0.00437072	-2.84363	-4.13863	1.74694e-05	5.4155e-05	-4.75772
KEGG_WNT_SIGNALING_PATHWAY	-2.06111	0.0196465	0.0410589	-1.70672	-2.65984	0.00390884	0.00897587	-2.40795	-4.15618	1.61803e-05	5.10091e-05	-4.79101
KEGG_SNARE_INTERACTIONS_IN_VESICULAR_TRANSPORT	1.31897	0.0935899	0.124063	1.02877	0.731465	0.232248	0.248265	0.634049	-4.1697	1.52503e-05	4.8906e-05	-4.81672
KEGG_RENAL_CELL_CARCINOMA	1.04955	0.146962	0.176355	0.832794	-2.57163	0.00506099	0.0106971	-2.29576	-4.19398	1.37051e-05	4.55204e-05	-4.86312
KEGG_ANTIGEN_PROCESSING_AND_PRESENTATION	4.97493	3.26359e-07	4.33591e-06	6.4863	4.45562	4.18252e-06	4.57616e-05	5.37856	-4.2082	1.28704e-05	4.35255e-05	-4.89041
KEGG_TIGHT_JUNCTION	-2.48409	0.00649412	0.0175059	-2.18748	-4.07034	2.34728e-05	0.00016792	-4.62944	-4.23663	1.13449e-05	3.98144e-05	-4.9452
KEGG_ALDOSTERONE_REGULATED_SODIUM_REABSORPTION	1.46877	0.070947	0.100552	1.14907	-2.41271	0.00791721	0.0150265	-2.10143	-4.27943	9.36843e-06	3.41672e-05	-5.02833
KEGG_LONG_TERM_POTENTIATION	-2.56243	0.00519715	0.0148718	-2.28423	-2.94972	0.00159033	0.0046219	-2.79851	-4.34559	6.945e-06	2.58354e-05	-5.15833
KEGG_LEISHMANIA_INFECTION	6.04958	7.2612e-10	1.35058e-07	9.13899	2.7137	0.00332681	0.00836199	2.47797	-4.37371	6.10773e-06	2.36674e-05	-5.21412
KEGG_DORSO_VENTRAL_AXIS_FORMATION	1.11851	0.131675	0.162833	0.880496	-3.88595	5.09653e-05	0.000296236	-4.29273	-4.40372	5.32044e-06	2.10554e-05	-5.27405
KEGG_EPITHELIAL_CELL_SIGNALING_IN_HELICOBACTER_PYLORI_INFECTION	1.27577	0.101018	0.130482	0.995601	-3.19206	0.000706303	0.00243282	-3.15101	-4.41762	4.98965e-06	2.01755e-05	-5.30193
KEGG_GAP_JUNCTION	0.631909	0.263723	0.269519	0.578852	-4.65351	1.63168e-06	2.2832e-05	-5.78737	-4.41955	4.94527e-06	2.01755e-05	-5.30581
KEGG_GLYCEROPHOSPHOLIPID_METABOLISM	-1.98233	0.0237214	0.0445674	-1.62486	-4.65351	1.63168e-06	2.2832e-05	-5.78737	-4.43898	4.51933e-06	1.91044e-05	-5.34493
KEGG_ACUTE_MYELOID_LEUKEMIA	0.925141	0.177446	0.199465	0.750933	0.788809	0.215112	0.23816	0.667336	-4.43947	4.50912e-06	1.91044e-05	-5.34591
KEGG_FC_EPSILON_RI_SIGNALING_PATHWAY	1.05657	0.145355	0.175558	0.837571	0.435731	0.331516	0.335119	0.479495	-4.48394	3.66386e-06	1.62256e-05	-5.43606
KEGG_TOLL_LIKE_RECEPTOR_SIGNALING_PATHWAY	5.2036	9.7731e-08	1.79085e-06	7.00997	1.63028	0.0515212	0.0731523	1.28801	-4.56662	2.47827e-06	1.12429e-05	-5.60585
KEGG_CYTOKINE_CYTOKINE_RECEPTOR_INTERACTION	5.61995	9.55076e-09	8.88221e-07	8.01996	3.76822	8.22074e-05	0.000436874	4.08509	-4.66342	1.55499e-06	7.61126e-06	-5.80827
KEGG_CALCIUM_SIGNALING_PATHWAY	1.59966	0.0548369	0.0822554	1.26093	-3.3264	0.00043988	0.00170484	-3.35667	-4.70517	1.26827e-06	6.37562e-06	-5.89679
KEGG_T_CELL_RECEPTOR_SIGNALING_PATHWAY	3.67344	0.000119652	0.000585663	3.92208	2.26657	0.0117084	0.0211433	1.9315	-4.72362	1.15843e-06	5.98524e-06	-5.93613
KEGG_NATURAL_KILLER_CELL_MEDIATED_CYTOTOXICITY	4.48541	3.63865e-06	3.02653e-05	5.43906	1.547	0.0609311	0.0839495	1.21516	-4.74161	1.06011e-06	5.63371e-06	-5.97465
KEGG_JAK_STAT_SIGNALING_PATHWAY	4.92575	4.2018e-07	5.21023e-06	6.37656	1.69756	0.0447951	0.0655935	1.34877	-4.74242	1.05592e-06	5.63371e-06	-5.97637
KEGG_HEMATOPOIETIC_CELL_LINEAGE	5.07381	1.94965e-07	2.7895e-06	6.71004	2.42034	0.00775298	0.0148665	2.11053	-4.75738	9.80613e-07	5.52709e-06	-6.0085
KEGG_B_CELL_RECEPTOR_SIGNALING_PATHWAY	4.47941	3.74249e-06	3.02653e-05	5.42684	2.42034	0.00775298	0.0148665	2.11053	-4.81848	7.23281e-07	4.32449e-06	-6.14069
KEGG_VIRAL_MYOCARDITIS	3.40402	0.000332007	0.00140349	3.47885	0.44876	0.326802	0.33216	0.485715	-4.82023	7.16961e-07	4.32449e-06	-6.1445
KEGG_MAPK_SIGNALING_PATHWAY	1.24675	0.106244	0.136286	0.973695	-4.65351	1.63168e-06	2.2832e-05	-5.78737	-4.84285	6.39936e-07	4.10442e-06	-6.19386
KEGG_VASCULAR_SMOOTH_MUSCLE_CONTRACTION	1.09922	0.135835	0.166219	0.866988	-3.31495	0.00045829	0.00170484	-3.33886	-4.90952	4.56495e-07	3.14474e-06	-6.34056
KEGG_ADHERENS_JUNCTION	0.691234	0.244709	0.253515	0.61135	-2.84835	0.0021973	0.00592315	-2.65811	-4.91497	4.43988e-07	3.14474e-06	-6.35263
KEGG_INOSITOL_PHOSPHATE_METABOLISM	0.602664	0.273366	0.277847	0.563255	-4.19702	1.35228e-05	0.000104802	-4.86893	-4.93982	3.90983e-07	2.90891e-06	-6.40784
KEGG_AXON_GUIDANCE	-4.19702	1.35228e-05	9.3157e-05	-4.86893	-3.07625	0.0010481	0.00342011	-2.9796	-5.04119	2.31325e-07	1.95575e-06	-6.63578
KEGG_LEUKOCYTE_TRANSENDOTHELIAL_MIGRATION	4.28135	9.28803e-06	6.64451e-05	5.03208	1.03559	0.150196	0.176813	0.823343	-5.04628	2.25253e-07	1.95575e-06	-6.64733
KEGG_ARRHYTHMOGENIC_RIGHT_VENTRICULAR_CARDIOMYOPATHY_ARVC	-3.05056	0.00114207	0.0040851	-2.94231	-3.99391	3.24957e-05	0.000223859	-4.48817	-5.05139	2.19303e-07	1.95575e-06	-6.65895
KEGG_PHOSPHATIDYLINOSITOL_SIGNALING_SYSTEM	-2.15815	0.0154582	0.0359404	-1.81084	-3.92612	4.31632e-05	0.000267612	-4.36489	-5.06265	2.06737e-07	1.95575e-06	-6.68458
KEGG_LYSOSOME	5.32515	5.04347e-08	1.46685e-06	7.29727	1.12336	0.130642	0.156771	0.883916	-5.07852	1.90197e-07	1.95575e-06	-6.7208
KEGG_GNRH_SIGNALING_PATHWAY	-3.10743	0.000943601	0.00344137	-3.02521	-3.63772	0.000137529	0.000639512	-3.8616	-5.11737	1.54913e-07	1.80087e-06	-6.80991
KEGG_ECM_RECEPTOR_INTERACTION	4.30484	8.3552e-06	6.21627e-05	5.07804	-3.89225	4.96598e-05	0.000296236	-4.30399	-5.25518	7.39408e-08	9.16866e-07	-7.13112
KEGG_REGULATION_OF_ACTIN_CYTOSKELETON	3.93866	4.09691e-05	0.000254008	4.38754	-2.69169	0.00355457	0.00869935	-2.44921	-5.35308	4.32355e-08	6.186e-07	-7.36416
KEGG_CHEMOKINE_SIGNALING_PATHWAY	3.80534	7.08048e-05	0.000399081	4.14994	-2.52665	0.00575776	0.0116407	-2.23975	-5.35798	4.20788e-08	6.186e-07	-7.37594
KEGG_HYPERTROPHIC_CARDIOMYOPATHY_HCM	-2.04585	0.0203857	0.0416675	-1.69067	-4.50208	3.36461e-06	3.91136e-05	-5.47306	-5.43572	2.72872e-08	4.61401e-07	-7.56404
KEGG_ENDOCYTOSIS	-2.54434	0.00547427	0.0154275	-2.26167	-3.96975	3.59748e-05	0.000230735	-4.444	-5.60297	1.05352e-08	3.06663e-07	-7.97736
KEGG_FOCAL_ADHESION	4.63039	1.82486e-06	1.99661e-05	5.73877	-4.37025	6.20526e-06	6.4121e-05	-5.20724	-5.61616	9.76247e-09	3.06663e-07	-8.01044
KEGG_FC_GAMMA_R_MEDIATED_PHAGOCYTOSIS	2.97041	0.001487	0.0051219	2.82769	-3.31708	0.000454815	0.00170484	-3.34217	-5.66296	7.43914e-09	3.06663e-07	-8.12848
KEGG_DILATED_CARDIOMYOPATHY	-2.50935	0.00604759	0.0167888	-2.21842	-4.65721	1.60261e-06	2.2832e-05	-5.79517	-5.79491	3.4179e-09	2.1191e-07	-8.46624
KEGG_CELL_ADHESION_MOLECULES_CAMS	3.58884	0.000166074	0.000792043	3.7797	-2.87583	0.00201482	0.00559339	-2.69576	-6.03652	7.87382e-10	7.32265e-08	-9.10381

## Sheet: GOBP comb.
	MESENCHYMAL vs. STAGE 1				11q-LOH vs STAGE 1				MYCNA vs STAGE 1
GOBP pathway name	NES	p-value	FDR	logP(+-)	NES	p-value	FDR	logP(+-)	NES	p-value	FDR	logP(+-)
CELL_CYCLE_PHASE	0.39686	0.345735	0.349121	0.461256	6.44106	5.93219e-11	4.89406e-08	10.2268	6.95913	1.71196e-12	1.41237e-09	11.7665
DNA_METABOLIC_PROCESS	0.641717	0.260529	0.26634	0.584145	6.08738	5.73867e-10	1.57814e-07	9.24119	6.24656	2.09789e-10	5.7692e-08	9.67822
NUCLEOBASENUCLEOSIDENUCLEOTIDE_AND_NUCLEIC_ACID_METABOLIC_PROCESS	0.319979	0.374492	0.376317	0.426557	5.85309	2.41258e-09	3.31729e-07	8.61752	6.11667	4.77767e-10	9.85395e-08	9.32078
CELL_CYCLE_GO_0007049	0.780539	0.217537	0.228913	0.662467	5.89101	1.91923e-09	3.16673e-07	8.71687	5.91208	1.68907e-09	2.18239e-07	8.77235
DNA_REPLICATION	-2.19878	0.0139467	0.0328744	-1.85553	5.21499	9.19137e-08	5.41635e-06	7.03662	5.88234	2.0225e-09	2.18239e-07	8.69411
RESPONSE_TO_DNA_DAMAGE_STIMULUS	-2.79642	0.0025836	0.00867494	-2.58777	5.39234	3.47734e-08	2.86881e-06	7.45875	5.87484	2.11626e-09	2.18239e-07	8.67443
MITOTIC_CELL_CYCLE	0.832679	0.202513	0.216697	0.693548	5.94486	1.38347e-09	2.8534e-07	8.85903	5.84501	2.53265e-09	2.20259e-07	8.59642
M_PHASE_OF_MITOTIC_CELL_CYCLE	0.828467	0.203703	0.217688	0.691003	6.32102	1.29921e-10	5.35925e-08	9.88632	5.83623	2.66981e-09	2.20259e-07	8.57352
CELL_CYCLE_PROCESS	-2.68092	0.00367098	0.0112586	-2.43522	5.59888	1.0787e-08	1.11241e-06	7.9671	5.81512	3.02958e-09	2.27218e-07	8.51862
REGULATION_OF_MITOSIS	1.71963	0.0427501	0.0699778	1.36906	5.06117	2.08341e-07	9.0464e-06	6.68122	5.76843	4.00075e-09	2.75051e-07	8.39786
DNA_REPAIR	-3.21512	0.000651945	0.00292312	-3.18579	5.14741	1.3205e-07	7.26277e-06	6.87926	5.73638	4.83611e-09	3.00944e-07	8.3155
RNA_PROCESSING	-3.66555	0.000123406	0.000808013	-3.90867	4.30396	8.38855e-06	0.000113452	5.07631	5.61459	9.85132e-09	5.35362e-07	8.00651
INTERPHASE_OF_MITOTIC_CELL_CYCLE	1.06361	0.143753	0.167746	0.842383	4.95231	3.66697e-07	1.33621e-05	6.43569	5.53387	1.56624e-08	6.9518e-07	7.80514
MITOSIS	0.883821	0.188396	0.20641	0.724927	5.69858	6.04043e-09	7.11908e-07	8.21893	5.47801	2.1507e-08	8.87165e-07	7.66742
RESPONSE_TO_ENDOGENOUS_STIMULUS	-2.27299	0.0115133	0.0280192	-1.9388	5.09008	1.78955e-07	8.20212e-06	6.74726	5.43076	2.80575e-08	9.78678e-07	7.55195
MRNA_PROCESSING_GO_0006397	-3.28995	0.000501021	0.00238926	-3.30014	5.03458	2.39452e-07	9.40703e-06	6.62078	5.4071	3.20262e-08	1.03699e-06	7.49449
M_PHASE	-1.94059	0.0261541	0.0516199	-1.58246	5.56444	1.315e-08	1.20542e-06	7.88107	5.37723	3.78195e-08	1.11432e-06	7.42228
CELL_CYCLE_CHECKPOINT_GO_0000075	-1.51516	0.0648665	0.0932314	-1.18798	4.94924	3.72519e-07	1.33621e-05	6.42885	5.33176	4.86328e-08	1.3374e-06	7.31307
DNA_DEPENDENT_DNA_REPLICATION	-2.29256	0.0109368	0.0268537	-1.96111	5.03999	2.32778e-07	9.40703e-06	6.63306	5.31528	5.3246e-08	1.41703e-06	7.27371
TRANSLATION	5.01762	2.61578e-07	8.30006e-06	6.5824	3.85418	5.80591e-05	0.000478988	4.23613	5.25192	7.52612e-08	1.88153e-06	7.12343
RNA_METABOLIC_PROCESS	0.166998	0.433686	0.433686	0.362825	5.11366	1.57987e-07	8.14618e-06	6.80138	5.24443	7.83833e-08	1.90195e-06	7.10578
RIBONUCLEOPROTEIN_COMPLEX_BIOGENESIS_AND_ASSEMBLY	0.843242	0.199546	0.214357	0.699956	5.09708	1.72465e-07	8.20212e-06	6.7633	5.22026	8.93383e-08	2.10583e-06	7.04896
BIOSYNTHETIC_PROCESS	5.47205	2.22427e-08	1.96517e-06	7.65281	3.80037	7.2241e-05	0.000567608	4.14122	5.09833	1.71328e-07	3.62086e-06	6.76617
BIOPOLYMER_METABOLIC_PROCESS	0.253032	0.400122	0.401094	0.397808	5.26024	7.1935e-08	4.56511e-06	7.14306	5.07969	1.8903e-07	3.66504e-06	6.72347
RNA_SPLICING	-3.09099	0.000997455	0.00417716	-3.00111	4.29641	8.67922e-06	0.000113656	5.06152	5.07769	1.91026e-07	3.66504e-06	6.71891
RIBOSOME_BIOGENESIS_AND_ASSEMBLY	1.89611	0.0289725	0.053713	1.53801	3.87976	5.22803e-05	0.000449283	4.28166	5.05313	2.17317e-07	4.01269e-06	6.66291
CHROMOSOME_SEGREGATION	-1.69393	0.0451396	0.0727348	-1.34544	4.86136	5.82898e-07	2.00371e-05	6.23441	5.05176	2.18874e-07	4.01269e-06	6.65981
REGULATION_OF_CELL_CYCLE	2.82062	0.00239655	0.00827262	2.62041	5.33473	4.78438e-08	3.58828e-06	7.32017	5.04062	2.32016e-07	4.16115e-06	6.63448
CELLULAR_BIOSYNTHETIC_PROCESS	5.62384	9.3379e-09	1.28396e-06	8.02975	3.89872	4.83509e-05	0.000433581	4.3156	5.03345	2.40866e-07	4.22797e-06	6.61822
MRNA_METABOLIC_PROCESS	-3.51258	0.000221889	0.00128938	-3.65386	4.70163	1.29045e-06	2.74721e-05	5.88926	5.00767	2.75465e-07	4.63793e-06	6.55993
INTERPHASE	0.987522	0.161693	0.183238	0.791308	5.31187	5.42528e-08	3.72988e-06	7.26558	4.9525	3.66339e-07	5.92607e-06	6.43612
RRNA_METABOLIC_PROCESS	1.44467	0.0742751	0.10162	1.12916	3.05546	0.00112359	0.00478877	2.94939	4.91415	4.45833e-07	6.84052e-06	6.35083
MACROMOLECULE_BIOSYNTHETIC_PROCESS	4.8777	5.36657e-07	1.38357e-05	6.2703	3.62796	0.000142836	0.000958048	3.84516	4.83644	6.60935e-07	9.56617e-06	6.17984
SISTER_CHROMATID_SEGREGATION	-2.07661	0.0189189	0.040227	-1.7231	4.49612	3.4603e-06	5.09776e-05	5.46089	4.79287	8.22044e-07	1.14947e-05	6.08511
DNA_INTEGRITY_CHECKPOINT	-1.3135	0.094507	0.1194	-1.02454	3.64052	0.000136046	0.000931928	3.86631	4.78794	8.42496e-07	1.15843e-05	6.07443
MITOTIC_SISTER_CHROMATID_SEGREGATION	-1.90486	0.0283992	0.0534917	-1.54669	4.74174	1.05947e-06	2.74721e-05	5.97491	4.75468	9.93802e-07	1.28107e-05	6.0027
S_PHASE	1.89611	0.0289725	0.053713	1.53801	3.64046	0.000136077	0.000931928	3.86622	4.71232	1.22454e-06	1.51636e-05	5.91203
NEGATIVE_REGULATION_OF_DNA_METABOLIC_PROCESS	1.88744	0.0295505	0.0542966	1.52943	4.29652	8.67501e-06	0.000113656	5.06173	4.69565	1.32881e-06	1.57053e-05	5.87654
CHROMOSOME_ORGANIZATION_AND_BIOGENESIS	-4.3202	7.79444e-06	8.93113e-05	-5.10822	4.68497	1.4e-06	2.74721e-05	5.85387	4.62523	1.87094e-06	2.14379e-05	5.72794
NUCLEOTIDE_EXCISION_REPAIR	1.11851	0.131675	0.155857	0.880496	3.27451	0.000529221	0.00261441	3.27636	4.6214	1.90583e-06	2.15105e-05	5.71992
DNA_DAMAGE_RESPONSESIGNAL_TRANSDUCTION	1.26252	0.103382	0.128063	0.985556	2.4596	0.00695466	0.0201319	2.15772	4.61884	1.92942e-06	2.15105e-05	5.71457
REGULATION_OF_DNA_METABOLIC_PROCESS	1.83272	0.0334221	0.0582944	1.47597	4.10287	2.04026e-05	0.000224429	4.69031	4.60447	2.06763e-06	2.21532e-05	5.68453
BASE_EXCISION_REPAIR	-2.94972	0.00159033	0.00603253	-2.79851	3.03938	0.00118533	0.00496393	2.92616	4.58325	2.28905e-06	2.39046e-05	5.64035
RNA_3END_PROCESSING	1.19276	0.116482	0.140905	0.933742	3.72224	9.87335e-05	0.00073383	4.00554	4.57147	2.42155e-06	2.4664e-05	5.61591
DNA_PACKAGING	-1.84096	0.0328137	0.0577213	-1.48394	3.67871	0.000117211	0.000852517	3.93103	4.54298	2.7732e-06	2.72368e-05	5.55702
RRNA_PROCESSING	1.37761	0.0841626	0.110388	1.07488	3.05399	0.00112909	0.00478877	2.94727	4.53441	2.88821e-06	2.80089e-05	5.53937
DOUBLE_STRAND_BREAK_REPAIR	1.09922	0.135835	0.159635	0.866988	3.26812	0.000541331	0.00265832	3.26654	4.52723	2.9881e-06	2.83354e-05	5.52461
MITOTIC_CELL_CYCLE_CHECKPOINT	-1.80837	0.0352748	0.0606286	-1.45254	4.61746	1.94236e-06	3.2049e-05	5.71167	4.50796	3.27269e-06	3.03368e-05	5.48509
NEGATIVE_REGULATION_OF_DNA_REPLICATION	1.94059	0.0261541	0.0516199	1.58246	4.01694	2.94794e-05	0.000296591	4.53048	4.47153	3.88313e-06	3.55953e-05	5.41082
DNA_RECOMBINATION	-3.05056	0.00114207	0.00466439	-2.94231	4.22909	1.17319e-05	0.000140862	4.93063	4.44483	4.39801e-06	3.98721e-05	5.35674
G1_PHASE_OF_MITOTIC_CELL_CYCLE	1.36908	0.0854865	0.111592	1.0681	4.04152	2.65531e-05	0.000271501	4.57588	4.40549	5.27732e-06	4.63169e-05	5.27759
PROTEIN_RNA_COMPLEX_ASSEMBLY	0.618228	0.268212	0.273517	0.571521	4.53126	2.93159e-06	4.47882e-05	5.5329	4.36744	6.28553e-06	5.34594e-05	5.20166
DNA_REPLICATION_INITIATION	1.37476	0.084603	0.11079	1.07261	4.54139	2.79422e-06	4.3495e-05	5.55374	4.3647	6.36476e-06	5.35809e-05	5.19622
TRNA_METABOLIC_PROCESS	2.65984	0.00390884	0.0118996	2.40795	3.55451	0.000189344	0.00120062	3.72275	4.30411	8.38285e-06	6.84738e-05	5.07661
RNA_SPLICINGVIA_TRANSESTERIFICATION_REACTIONS	-2.60959	0.00453255	0.0134509	-2.34366	3.76979	8.16941e-05	0.000635827	4.08781	4.26174	1.01422e-05	8.20321e-05	4.99387
CENTROSOME_ORGANIZATION_AND_BIOGENESIS	-1.88744	0.0295505	0.0542966	-1.52943	1.6903	0.0454853	0.078341	1.34213	4.20271	1.3187e-05	0.000103612	4.87985
MITOCHONDRION_ORGANIZATION_AND_BIOGENESIS	3.8482	5.94955e-05	0.000446216	4.22552	4.50051	3.38956e-06	5.08434e-05	5.46986	4.19999	1.33461e-05	0.000103873	4.87465
MICROTUBULE_ORGANIZING_CENTER_ORGANIZATION_AND_BIOGENESIS	-1.84926	0.0322099	0.0577213	-1.49201	2.21677	0.0133195	0.0334	1.87551	4.16466	1.55911e-05	0.00011588	4.80712
MEIOTIC_CELL_CYCLE	-1.90926	0.0281144	0.0534432	-1.55107	3.43957	0.000291323	0.00169255	3.53562	4.1346	1.77784e-05	0.000128659	4.75011
REGULATION_OF_DNA_REPLICATION	1.40058	0.0806706	0.107866	1.09328	2.75981	0.00289176	0.0100239	2.53884	4.12987	1.81486e-05	0.000130197	4.74116
NUCLEOSOME_ASSEMBLY	-2.46768	0.0067996	0.0182132	-2.16752	2.30585	0.0105596	0.0277441	1.97635	4.12148	1.88225e-05	0.000133867	4.72532
S_PHASE_OF_MITOTIC_CELL_CYCLE	1.42098	0.077661	0.104519	1.1098	2.19287	0.0141585	0.0347643	1.84898	4.06139	2.4391e-05	0.000167688	4.61277
CELLULAR_COMPONENT_DISASSEMBLY	2.89413	0.00190103	0.00690903	2.72101	2.98106	0.00143626	0.00578006	2.84277	4.01615	2.95789e-05	0.000196795	4.52902
DNA_DAMAGE_CHECKPOINT	-1.48099	0.069305	0.0972392	-1.15924	1.99663	0.0229327	0.0482641	1.63954	4.01033	3.03172e-05	0.000198505	4.51831
PROTEIN_FOLDING	1.87884	0.0301333	0.0551219	1.52095	2.97066	0.00148581	0.00595044	2.82804	4.00068	3.15805e-05	0.000205149	4.50058
CHROMATIN_ASSEMBLY_OR_DISASSEMBLY	-2.93429	0.00167157	0.00624003	-2.77688	3.73903	9.23667e-05	0.00069275	4.03448	3.98324	3.39911e-05	0.000217385	4.46863
ESTABLISHMENT_OF_ORGANELLE_LOCALIZATION	1.29183	0.0982081	0.123133	1.00785	3.85701	5.73908e-05	0.000478256	4.24116	3.96659	3.64536e-05	0.000227835	4.43826
RESPONSE_TO_ABIOTIC_STIMULUS	0.907649	0.182032	0.202122	0.739853	2.94642	0.00160739	0.00622581	2.79388	3.90762	4.66039e-05	0.000270762	4.33158
CHROMOSOME_CONDENSATION	1.20291	0.114506	0.138923	0.941172	3.34907	0.000405415	0.00207863	3.3921	3.86361	5.58622e-05	0.000307242	4.25288
CENTROSOME_CYCLE	-2.10301	0.0177322	0.0383966	-1.75124	1.18771	0.117474	0.156316	0.930058	3.86168	5.63057e-05	0.00030763	4.24945
CELLULAR_PROTEIN_COMPLEX_DISASSEMBLY	1.30805	0.0954274	0.120379	1.02033	4.45856	4.12553e-06	5.97116e-05	5.38452	3.82512	6.53531e-05	0.000352394	4.18473
RNA_BIOSYNTHETIC_PROCESS	0.879516	0.189561	0.207411	0.722251	4.22815	1.17812e-05	0.000140862	4.92881	3.8189	6.70245e-05	0.00035906	4.17377
G1_S_TRANSITION_OF_MITOTIC_CELL_CYCLE	-1.38331	0.0832844	0.109935	-1.07944	3.12456	0.000890343	0.00403589	3.05044	3.8088	6.98206e-05	0.000371626	4.15602
PROTEIN_COMPLEX_DISASSEMBLY	1.58962	0.0559603	0.0842468	1.25212	4.113	1.95275e-05	0.000217705	4.70935	3.7196	9.97706e-05	0.000514442	4.001
MACROMOLECULAR_COMPLEX_DISASSEMBLY	1.55023	0.0605428	0.0880914	1.21794	3.86846	5.47623e-05	0.000461009	4.26152	3.70624	0.000105179	0.00053896	3.97807
CHROMATIN_ASSEMBLY	-2.99823	0.00135774	0.0054113	-2.86718	2.10301	0.0177322	0.0403005	1.75124	3.67821	0.000117436	0.000587182	3.9302
DNA_DAMAGE_RESPONSESIGNAL_TRANSDUCTION_RESULTING_IN_INDUCTION_OF_APOPTOSIS	1.83683	0.0331173	0.0581315	1.47994	2.69169	0.00355457	0.0118726	2.44921	3.65357	0.000129308	0.000638798	3.88837
DNA_CATABOLIC_PROCESS	2.18699	0.0143717	0.0334935	1.84249	2.75981	0.00289176	0.0100239	2.53884	3.59737	0.000160726	0.000770922	3.79392
INDUCTION_OF_APOPTOSIS_BY_INTRACELLULAR_SIGNALS	2.19287	0.0141585	0.0331841	1.84898	2.04081	0.0206347	0.0452756	1.6854	3.59376	0.000162969	0.000777164	3.7879
SPLICEOSOME_ASSEMBLY	-2.78401	0.00268458	0.00889468	-2.57112	3.24606	0.000585061	0.00283927	3.2328	3.53543	0.000203557	0.000939274	3.69132
GAMETE_GENERATION	1.33826	0.0904062	0.115636	1.0438	4.0015	3.14716e-05	0.000305459	4.50208	3.52939	0.000208262	0.00094926	3.68139
HETEROCYCLE_METABOLIC_PROCESS	3.03155	0.0012165	0.00491967	2.91489	3.53346	0.000205081	0.00127212	3.68807	3.49841	0.000234022	0.00105424	3.63074
AROMATIC_COMPOUND_METABOLIC_PROCESS	1.71223	0.0434274	0.0705269	1.36224	1.14045	0.127049	0.164804	0.896029	3.4845	0.000246525	0.00109937	3.60814
RESPONSE_TO_RADIATION	-2.00628	0.0224132	0.0456566	-1.6495	1.93154	0.0267081	0.0533515	1.57336	3.45016	0.000280125	0.00121633	3.55265
G2_M_TRANSITION_OF_MITOTIC_CELL_CYCLE	1.84096	0.0328137	0.0577213	1.48394	4.0127	3.00145e-05	0.000298337	4.52267	3.43898	0.000291953	0.00126102	3.53469
TRANSCRIPTION_DNA_DEPENDENT	0.866648	0.193067	0.20903	0.714291	3.97624	3.50066e-05	0.000335819	4.45585	3.43459	0.000296722	0.00126837	3.52765
REGULATION_OF_MITOTIC_CELL_CYCLE	2.86196	0.00210516	0.0074539	2.67671	3.68613	0.000113847	0.000838603	3.94368	3.34709	0.000408323	0.00170998	3.389
PROTEIN_DNA_COMPLEX_ASSEMBLY	-3.34549	0.000410688	0.00204107	-3.38649	3.82288	6.59499e-05	0.000533418	4.18079	3.3232	0.000444954	0.00183543	3.35169
ONE_CARBON_COMPOUND_METABOLIC_PROCESS	-3.31708	0.000454815	0.00220719	-3.34217	2.78516	0.00267506	0.00946485	2.57267	3.29142	0.000498423	0.00200421	3.3024
RESPONSE_TO_IONIZING_RADIATION	-1.5963	0.0552104	0.0835754	-1.25798	1.42392	0.0772347	0.113783	1.11219	3.28995	0.000501021	0.00200421	3.30014
SEXUAL_REPRODUCTION	1.52146	0.0640717	0.092573	1.19333	4.04061	2.66565e-05	0.000271501	4.5742	3.23907	0.000599602	0.00231155	3.22214
MEIOTIC_RECOMBINATION	-2.92682	0.00171223	0.00633448	-2.76644	1.29722	0.0972779	0.135336	1.01199	3.21447	0.00065342	0.00246151	3.18481
DETECTION_OF_ABIOTIC_STIMULUS	2.53545	0.00561522	0.0156505	2.25063	2.64952	0.00403028	0.0129882	2.39466	3.1979	0.000692152	0.00257652	3.1598
MEIOSIS_I	-3.59592	0.000161624	0.000981017	-3.79149	1.31623	0.094048	0.132859	1.02665	3.15176	0.000811444	0.00294908	3.09074
NUCLEOBASENUCLEOSIDE_AND_NUCLEOTIDE_METABOLIC_PROCESS	2.40515	0.00808296	0.0210361	2.09243	2.77181	0.0027873	0.0097852	2.55482	3.14577	0.000828258	0.0029839	3.08183
ESTABLISHMENT_AND_OR_MAINTENANCE_OF_CHROMATIN_ARCHITECTURE	-4.87047	5.56675e-07	1.39169e-05	-6.2544	3.57877	0.000172607	0.00113233	3.76294	3.12756	0.000881324	0.00312057	3.05486
MORPHOGENESIS_OF_AN_EPITHELIUM	2.16384	0.0152382	0.0349209	1.81707	2.56243	0.00519715	0.0159392	2.28423	3.11545	0.000918326	0.00322391	3.037
AMINO_ACID_AND_DERIVATIVE_METABOLIC_PROCESS	2.68092	0.00367098	0.0112586	2.43522	0.303634	0.380703	0.384902	0.419413	3.10743	0.000943601	0.0032572	3.02521
TRANSCRIPTION_FROM_RNA_POLYMERASE_II_PROMOTER	1.23893	0.107686	0.132204	0.967841	3.89213	4.96841e-05	0.000436057	4.30378	3.06897	0.00107399	0.00351603	2.969
TRANSCRIPTION_FROM_RNA_POLYMERASE_III_PROMOTER	-1.76506	0.038777	0.0652878	-1.41143	2.15815	0.0154582	0.0372896	1.81084	3.06011	0.00110629	0.00359327	2.95613
TRANSLATIONAL_INITIATION	1.86606	0.0310163	0.0562383	1.50841	3.49461	0.000237376	0.00143246	3.62456	3.04126	0.00117795	0.00375214	2.92887
AMINO_ACID_METABOLIC_PROCESS	2.90483	0.00183727	0.00670684	2.73583	0.564066	0.286355	0.300946	0.543096	3.03265	0.00121206	0.0038021	2.91647
NUCLEOTIDE_SUGAR_METABOLIC_PROCESS	3.43175	0.000299847	0.00161682	3.5231	1.76506	0.038777	0.0695457	1.41143	2.99823	0.00135774	0.00417962	2.86718
CYTOKINESIS	-3.21512	0.000651945	0.00292312	-3.18579	3.63931	0.000136683	0.000931928	3.86429	2.98167	0.00143341	0.00435794	2.84363
SPINDLE_ORGANIZATION_AND_BIOGENESIS	-3.34549	0.000410688	0.00204107	-3.38649	2.93068	0.00169113	0.00642797	2.77182	2.9655	0.00151094	0.00453282	2.82075
N_TERMINAL_PROTEIN_AMINO_ACID_MODIFICATION	1.46574	0.0713598	0.0984479	1.14655	1.79639	0.0362165	0.0661031	1.44109	2.94972	0.00159033	0.0046858	2.79851
CELL_PROLIFERATION_GO_0008283	5.3061	5.59968e-08	3.3169e-06	7.25184	4.44186	4.45924e-06	6.34288e-05	5.35074	2.93429	0.00167157	0.0048558	2.77688
NEGATIVE_REGULATION_OF_CELLULAR_BIOSYNTHETIC_PROCESS	3.61497	0.000150191	0.000931639	3.82335	3.01585	0.00128128	0.005259	2.89235	2.9192	0.00175465	0.00504385	2.75581
NITROGEN_COMPOUND_CATABOLIC_PROCESS	1.55671	0.0597693	0.0875838	1.22352	1.42687	0.0768092	0.113359	1.11459	2.91746	0.00176446	0.00505445	2.75339
MITOCHONDRIAL_TRANSPORT	2.77905	0.00272588	0.00899542	2.56449	3.37369	0.000370839	0.00202611	3.43081	2.88999	0.00192628	0.00536886	2.71528
CELL_DIVISION	-3.26398	0.000549289	0.00256024	-3.2602	3.49596	0.000236184	0.00143246	3.62675	2.87583	0.00201482	0.00550407	2.69576
STEROID_BIOSYNTHETIC_PROCESS	4.05584	2.49769e-05	0.000223978	4.60246	2.12468	0.0168066	0.0388389	1.77452	2.87583	0.00201482	0.00550407	2.69576
PIGMENT_METABOLIC_PROCESS	2.06111	0.0196465	0.0410338	1.70672	2.21073	0.0135272	0.0336143	1.86879	2.86196	0.00210516	0.00571302	2.67671
SMOOTH_MUSCLE_CONTRACTION_GO_0006939	2.50084	0.00619487	0.0170359	2.20797	1.36626	0.0859294	0.12372	1.06586	2.85161	0.00217491	0.00584764	2.66256
TRNA_PROCESSING	1.33549	0.0908585	0.116034	1.04163	1.90926	0.0281144	0.0552246	1.55107	2.8496	0.00218869	0.00584764	2.65982
SENSORY_PERCEPTION	3.19589	0.000697005	0.00305867	3.15676	0.548746	0.29159	0.305281	0.535227	2.82706	0.00234884	0.00619103	2.62915
PIGMENT_BIOSYNTHETIC_PROCESS	1.93154	0.0267081	0.0522137	1.57336	2.10301	0.0177322	0.0403005	1.75124	2.82191	0.00238691	0.00619246	2.62216
RESPONSE_TO_STRESS	4.98442	3.10742e-07	9.1216e-06	6.5076	4.21186	1.26638e-05	0.000149252	4.89744	2.81913	0.0024077	0.0062268	2.6184
CELLULAR_RESPONSE_TO_STIMULUS	0.811691	0.208484	0.220795	0.680926	2.06111	0.0196465	0.0436883	1.70672	2.80293	0.00253204	0.00643949	2.59653
DNA_DAMAGE_RESPONSESIGNAL_TRANSDUCTION_BY_P53_CLASS_MEDIATOR	1.49641	0.0672734	0.0953618	1.17216	1.4122	0.0789455	0.115684	1.10267	2.79642	0.0025836	0.00643949	2.58777
G1_PHASE	1.04256	0.148576	0.171194	0.828051	4.05322	2.5259e-05	0.000263781	4.59758	2.79642	0.0025836	0.00643949	2.58777
REGULATION_OF_CYCLIN_DEPENDENT_PROTEIN_KINASE_ACTIVITY	1.19276	0.116482	0.140905	0.933742	3.84776	5.96021e-05	0.000486849	4.22474	2.79642	0.0025836	0.00643949	2.58777
TRANSCRIPTION_INITIATION	-2.79642	0.0025836	0.00867494	-2.58777	3.57546	0.000174803	0.00113553	3.75745	2.79642	0.0025836	0.00643949	2.58777
DNA_MODIFICATION	-1.61318	0.0533532	0.0821201	-1.27284	2.55333	0.00533491	0.0160631	2.27287	2.78401	0.00268458	0.0065916	2.57112
REGULATION_OF_CHROMOSOME_ORGANIZATION_AND_BIOGENESIS	-1.3948	0.0815383	0.108499	-1.08864	2.36833	0.0089342	0.0241663	2.04894	2.78401	0.00268458	0.0065916	2.57112
POSITIVE_REGULATION_OF_CELL_CYCLE	2.84835	0.0021973	0.00771391	2.65811	2.17534	0.0148023	0.0361298	1.82967	2.77513	0.00275901	0.00671441	2.55925
ACUTE_INFLAMMATORY_RESPONSE	2.64952	0.00403028	0.0122242	2.39466	1.13067	0.129098	0.166156	0.88908	2.72496	0.00321548	0.00768919	2.49275
AMINE_METABOLIC_PROCESS	2.97451	0.0014673	0.0057644	2.83348	-2.59992	0.00466222	0.0145695	-2.33141	2.7137	0.00332681	0.00790957	2.47797
GLUCOSE_METABOLIC_PROCESS	2.53545	0.00561522	0.0156505	2.25063	1.50888	0.065665	0.100508	1.18267	2.69169	0.00355457	0.00837863	2.44921
AMINE_CATABOLIC_PROCESS	1.30263	0.096351	0.121173	1.01614	0.953873	0.170074	0.204535	0.769362	2.68092	0.00367098	0.0085795	2.43522
MITOTIC_SPINDLE_ORGANIZATION_AND_BIOGENESIS	-3.37531	0.000368657	0.00190933	-3.43338	2.86196	0.00210516	0.00778816	2.67671	2.65984	0.00390884	0.00895777	2.40795
REGULATION_OF_PROTEIN_STABILITY	1.42982	0.0763846	0.103307	1.11699	1.40058	0.0806706	0.117585	1.09328	2.65984	0.00390884	0.00895777	2.40795
APOPTOTIC_NUCLEAR_CHANGES	1.94972	0.0256049	0.0507789	1.59168	3.01979	0.00126476	0.00521713	2.89799	2.63934	0.00415337	0.00943948	2.3816
DNA_FRAGMENTATION_DURING_APOPTOSIS	2.79642	0.0025836	0.00867494	2.58777	3.05325	0.00113189	0.00478877	2.94619	2.60959	0.00453255	0.0100791	2.34366
EPITHELIAL_CELL_DIFFERENTIATION	0.909828	0.181457	0.201754	0.741227	1.30805	0.0954274	0.133437	1.02033	2.60959	0.00453255	0.0100791	2.34366
EPITHELIAL_TO_MESENCHYMAL_TRANSITION	2.93429	0.00167157	0.00624003	2.77688	3.35899	0.000391146	0.00207863	3.40766	2.60959	0.00453255	0.0100791	2.34366
TRANSCRIPTION	0.890294	0.186654	0.205046	0.728963	3.57228	0.000176943	0.00114045	3.75217	2.60959	0.00453255	0.0100791	2.34366
POSITIVE_REGULATION_OF_DNA_METABOLIC_PROCESS	2.74801	0.00299794	0.00977591	2.52318	2.63934	0.00415337	0.0132299	2.3816	2.59992	0.00466222	0.0103396	2.33141
NITROGEN_COMPOUND_METABOLIC_PROCESS	3.92334	4.36642e-05	0.000343076	4.35987	0.253032	0.400122	0.403546	0.397808	2.59038	0.00479353	0.010574	2.31934
POSITIVE_REGULATION_OF_EPITHELIAL_CELL_PROLIFERATION	2.31257	0.0103731	0.0261708	1.98409	0.663404	0.253536	0.275946	0.59596	2.58095	0.00492645	0.0107522	2.30747
PROTEIN_TARGETING_TO_MITOCHONDRION	2.9655	0.00151094	0.00585224	2.82075	2.95175	0.00157989	0.00618879	2.80137	2.55333	0.00533491	0.0115824	2.27287
CELLULAR_RESPONSE_TO_NUTRIENT_LEVELS	0.873073	0.191312	0.207947	0.718259	1.49331	0.0676779	0.102261	1.16955	2.50935	0.00604759	0.0128922	2.21842
ORGANELLE_LOCALIZATION	0.753844	0.225471	0.235461	0.646909	3.90403	4.73027e-05	0.000428843	4.32511	2.46768	0.0067996	0.014347	2.16752
NEGATIVE_REGULATION_OF_BIOSYNTHETIC_PROCESS	3.82693	6.48766e-05	0.000477885	4.18791	3.05348	0.00113102	0.00478877	2.94653	2.43582	0.00742907	0.0153994	2.12907
GLUTAMINE_FAMILY_AMINO_ACID_METABOLIC_PROCESS	0.93394	0.175167	0.195817	0.756547	-1.43574	0.0755381	0.112286	-1.12183	2.42034	0.00775298	0.0159905	2.11053
REGULATION_OF_TRANSLATIONAL_INITIATION	1.91811	0.0275482	0.0526095	1.55991	2.9438	0.00162107	0.00624945	2.7902	2.38287	0.00858922	0.0174966	2.06605
REGULATION_OF_RNA_METABOLIC_PROCESS	0.383971	0.3505	0.353499	0.455312	2.21073	0.0135272	0.0336143	1.86879	2.35405	0.00928512	0.0187292	2.03221
CALCIUM_INDEPENDENT_CELL_CELL_ADHESION	1.5665	0.0586162	0.0865088	1.23198	2.55333	0.00533491	0.0160631	2.27287	2.31935	0.0101882	0.0202536	1.9919
CHROMATIN_REMODELING	-3.1073	0.000944038	0.00399401	-3.02501	3.03403	0.00120657	0.00502737	2.91845	2.31935	0.0101882	0.0202536	1.9919
AMINE_BIOSYNTHETIC_PROCESS	1.15029	0.125011	0.149254	0.90305	-2.41271	0.00791721	0.0221414	-2.10143	2.31257	0.0103731	0.0205717	1.98409
APOPTOTIC_MITOCHONDRIAL_CHANGES	2.55333	0.00533491	0.0151769	2.27287	1.13555	0.128072	0.165611	0.892545	2.30585	0.0105596	0.0206437	1.97635
EMBRYONIC_MORPHOGENESIS	2.47584	0.00664608	0.0179184	2.17743	1.25988	0.103857	0.142565	0.983565	2.30585	0.0105596	0.0206437	1.97635
ANION_TRANSPORT	3.73035	9.56059e-05	0.000662814	4.01952	2.37557	0.00876097	0.0240126	2.05745	2.27946	0.0113197	0.0215676	1.94616
AMINO_ACID_CATABOLIC_PROCESS	1.31623	0.094048	0.119002	1.02665	0.832679	0.202513	0.234683	0.693548	2.27299	0.0115133	0.0217856	1.9388
AGING	1.75353	0.0397555	0.0662591	1.4006	1.19783	0.115492	0.154929	0.937447	2.26657	0.0117084	0.0220535	1.9315
TRANSCRIPTION_INITIATION_FROM_RNA_POLYMERASE_II_PROMOTER	-2.87583	0.00201482	0.00719579	-2.69576	3.51528	0.000219642	0.00135227	3.65828	2.26657	0.0117084	0.0220535	1.9315
XENOBIOTIC_METABOLIC_PROCESS	0.749762	0.226699	0.236145	0.64455	0.89462	0.185495	0.218932	0.731668	2.23512	0.0127048	0.0235011	1.89603
CARBOHYDRATE_BIOSYNTHETIC_PROCESS	1.36061	0.086818	0.112441	1.06139	1.19783	0.115492	0.154929	0.937447	2.21677	0.0133195	0.0245281	1.87551
LIPOPROTEIN_METABOLIC_PROCESS	1.61999	0.0526173	0.0815964	1.27887	2.65984	0.00390884	0.0127462	2.40795	2.20474	0.0137363	0.0252392	1.86213
REGULATION_OF_NUCLEOBASENUCLEOSIDENUCLEOTIDE_AND_NUCLEIC_ACID_METABOLIC_PROCESS	0.289139	0.386237	0.387647	0.413146	2.50935	0.00604759	0.0178188	2.21842	2.16957	0.0150196	0.0269373	1.82334
RESPONSE_TO_LIGHT_STIMULUS	-2.60959	0.00453255	0.0134509	-2.34366	0.776414	0.218752	0.246544	0.660048	2.16957	0.0150196	0.0269373	1.82334
PROTEIN_AMINO_ACID_ADP_RIBOSYLATION	0.851727	0.197183	0.212371	0.705131	2.14126	0.0161264	0.0379039	1.79246	2.14126	0.0161264	0.02855	1.79246
AMINO_ACID_DERIVATIVE_METABOLIC_PROCESS	2.54434	0.00547427	0.0154667	2.26167	0.643682	0.259891	0.279909	0.585209	2.11379	0.0172668	0.0300529	1.76279
LIPID_BIOSYNTHETIC_PROCESS	3.41863	0.000314689	0.00168583	3.50212	2.36833	0.0089342	0.0241663	2.04894	2.10839	0.0174988	0.0303927	1.75699
CELLULAR_CATABOLIC_PROCESS	1.61658	0.0529847	0.082012	1.27585	1.07304	0.141627	0.178113	0.848855	2.09236	0.018203	0.0312863	1.73986
CELLULAR_RESPONSE_TO_STRESS	-1.48099	0.069305	0.0972392	-1.15924	0.903298	0.183184	0.216825	0.737112	2.09236	0.018203	0.0312863	1.73986
BRAIN_DEVELOPMENT	-2.10301	0.0177322	0.0383966	-1.75124	0.766131	0.221799	0.248283	0.65404	2.08708	0.0184403	0.0316283	1.73423
COENZYME_METABOLIC_PROCESS	1.14537	0.126029	0.150251	0.89953	0.512612	0.304112	0.316383	0.516967	2.05599	0.0198916	0.0336973	1.70133
SECONDARY_METABOLIC_PROCESS	1.72708	0.042077	0.0691504	1.37596	0.598785	0.274658	0.292312	0.561207	2.0358	0.020885	0.0350919	1.68017
RESPONSE_TO_HEAT	1.59296	0.0555849	0.0839881	1.25504	2.15248	0.0156796	0.0374947	1.80466	2.03082	0.0211365	0.0354423	1.67497
REGULATION_OF_TRANSCRIPTION_FROM_RNA_POLYMERASE_II_PROMOTER	0.85811	0.195416	0.211018	0.70904	2.64952	0.00403028	0.0129882	2.39466	2.01602	0.0218987	0.0364243	1.65958
RESPONSE_TO_UV	-2.28599	0.0111275	0.027241	-1.9536	1.03559	0.150196	0.184392	0.823343	2.01114	0.0221554	0.0367032	1.65452
VIRAL_GENOME_REPLICATION	1.47487	0.0701242	0.0975589	1.15413	1.58962	0.0559603	0.0896451	1.25212	2.01114	0.0221554	0.0367032	1.65452
NEGATIVE_REGULATION_OF_BINDING	3.4505	0.000279777	0.00155394	3.55319	1.17515	0.119968	0.157853	0.920934	2.00628	0.0224132	0.0370559	1.6495
MRNA_SPLICE_SITE_SELECTION	-3.40672	0.000328741	0.00174975	-3.48315	2.26019	0.0119048	0.0307884	1.92428	1.99663	0.0229327	0.0374644	1.63954
NITROGEN_COMPOUND_BIOSYNTHETIC_PROCESS	2.02586	0.0213893	0.043896	1.6698	-1.64414	0.050074	0.082954	-1.30039	1.99663	0.0229327	0.0374644	1.63954
OVULATION_CYCLE	1.60303	0.0544645	0.0832096	1.26389	2.62929	0.00427812	0.0135228	2.36875	1.99663	0.0229327	0.0374644	1.63954
REPRODUCTION	2.06111	0.0196465	0.0410338	1.70672	2.55333	0.00533491	0.0160631	2.27287	1.99184	0.0231944	0.0377423	1.63462
CELLULAR_RESPONSE_TO_EXTRACELLULAR_STIMULUS	0.965028	0.167265	0.188516	0.776594	1.58297	0.0567142	0.0905014	1.24631	1.98233	0.0237214	0.0385239	1.62486
REGULATION_OF_TRANSCRIPTIONDNA_DEPENDENT	0.424593	0.335567	0.339684	0.474221	2.07141	0.0191601	0.0428376	1.7176	1.9729	0.0242534	0.0392334	1.61523
REGULATION_OF_MUSCLE_CONTRACTION	2.80523	0.00251402	0.00864195	2.59963	1.5963	0.0552104	0.0887886	1.25798	1.94514	0.0258789	0.0411369	1.58705
[truncated: 644 more rows]
