# Supplementary material for: Cross-Cohort Analysis Identifies a TEAD4–MYCN Positive Feedback Loop as the Core Regulatory Element of High-Risk Neuroblastoma
Source: Oxford University Press journal article supplement (doi:10.1158/2159-8290.cd-16-0861), 2018-03-06
Supplement: 21598290cd160861-sup-169577_3_supp_4574642_p49g29.xlsx [file 21598290cd160861-sup-169577_3_supp_4574642_p49g29.xlsx]

## Sheet: MES-Mesenchymal-marina
	TARGET-nes	TARGET-p.val	NRC-nes	NRC-p.val	stoufer-nes	fishers-p.val	logP*sign(nes)
ZDHHC23	5.42361	5.84084e-08	2.93499	0.00333562	5.91042	4.55097e-09	8.3419
CEBPB	2.87513	0.00403862	3.31461	0.000917711	4.37681	5.00552e-05	4.30055
SMAD3	2.45778	0.01398	3.60299	0.000314579	4.28561	5.86423e-05	4.23179
RUNX1	1.74767	0.0805216	4.03226	5.52442e-05	4.08702	5.92653e-05	4.2272
BNC2	1.61971	0.105294	4.07791	4.54422e-05	4.02883	6.33988e-05	4.19792
CEBPD	3.01685	0.00255413	3.01619	0.00255972	4.26601	8.45861e-05	4.0727
IFI16	2.72957	0.00634179	3.27134	0.00107039	4.24328	8.757e-05	4.05764
SATB2	1.78068	0.074965	3.90912	9.26339e-05	4.02329	8.94259e-05	4.04854
NR2F1	2.59003	0.00959676	3.34163	0.000832878	4.19432	0.000101806	3.99223
TEAD4	2.36974	0.0178008	3.31645	0.000911699	4.02074	0.000195214	3.70949
PPARG	1.9067	0.0565591	3.50475	0.000457036	3.82648	0.000298904	3.52447
XBP1	3.20127	0.00136822	2.33557	0.0195135	3.91514	0.00030786	3.51165
MITF	2.57662	0.00997727	2.96746	0.0030027	3.92025	0.000342	3.46597
MAF	2.46118	0.0138482	3.05524	0.00224878	3.9007	0.000354296	3.45063
REST	2.28703	0.0221938	3.18505	0.00144731	3.86935	0.000364448	3.43836
LMO4	2.69125	0.00711838	2.7327	0.00628174	3.83532	0.000492553	3.30755
RUNX2	2.72414	0.00644692	2.68858	0.00717567	3.82737	0.000508002	3.29414
NR6A1	2.31577	0.0205708	3.04865	0.00229874	3.79322	0.000518229	3.28548
RARB	2.48206	0.0130624	2.90415	0.0036825	3.80863	0.000526346	3.27873
CREB3L1	2.04113	0.0412379	3.23664	0.00120944	3.73195	0.000543935	3.26445
CSDA	1.89574	0.0579939	3.31264	0.000924207	3.68288	0.000580684	3.23606
ZNFX1	2.84636	0.00442217	2.41663	0.015665	3.7215	0.000732736	3.13505
RARG	2.87019	0.0041023	2.3837	0.0171398	3.71506	0.000742679	3.1292
TGIF2	1.81602	0.0693675	3.27678	0.00104999	3.60115	0.000766759	3.11534
STAT1	2.84513	0.00443934	2.37867	0.0173751	3.69379	0.000807592	3.09281
PRRX1	1.93942	0.0524499	3.11116	0.00186352	3.5713	0.00100021	2.99991
MMP14	1.66794	0.095328	3.22662	0.0012526	3.46098	0.00119801	2.92154
NOTCH2	2.07385	0.0380932	2.94097	0.00327191	3.54601	0.00124514	2.90478
NPAS2	1.33659	0.181355	3.38058	0.000723318	3.33555	0.00130377	2.8848
PRDM8	2.13152	0.0330461	2.86418	0.00418085	3.5325	0.00136601	2.86455
TSC22D2	2.24653	0.0246699	2.76955	0.00561344	3.5469	0.00136887	2.86364
ATF5	2.02669	0.0426937	2.93373	0.0033492	3.50755	0.00140884	2.85114
LITAF	2.59158	0.00955369	2.363	0.0181276	3.50342	0.00167317	2.77646
ZBTB47	1.97002	0.0488366	2.89087	0.00384179	3.43716	0.0017976	2.74531
AEBP1	1.78078	0.0749489	3.02117	0.002518	3.39549	0.00180705	2.74303
ELF4	2.61773	0.0088516	2.28699	0.0221966	3.46816	0.00187338	2.72737
ELK3	1.95654	0.0504012	2.88281	0.0039415	3.42194	0.00189199	2.72308
NFIX	1.73126	0.0834055	3.02979	0.00244727	3.36657	0.00193845	2.71254
FOSL2	1.78734	0.0738825	2.98307	0.00285369	3.37319	0.00199546	2.69996
NR1H2	2.31889	0.0204009	2.55907	0.0104954	3.44924	0.00202317	2.69397
RNF4	2.40093	0.0163536	2.46659	0.0136407	3.44185	0.00209868	2.67805
NFATC4	1.82888	0.0674172	2.91398	0.0035685	3.35371	0.00224519	2.64875
SNAI2	1.45885	0.144607	3.13509	0.00171804	3.2484	0.00231057	2.63628
ZFP36L1	1.94639	0.0516082	2.79835	0.00513643	3.35504	0.00244816	2.61116
SP100	2.45234	0.0141929	2.34869	0.0188398	3.39484	0.00246717	2.6078
HMG20B	2.05864	0.039529	2.70281	0.00687559	3.36685	0.00250328	2.60149
HIF1A	2.26846	0.0233011	2.51502	0.0119024	3.38244	0.00254882	2.59366
ZNF217	2.06743	0.0386934	2.68354	0.00728477	3.35944	0.00258591	2.58739
HOXD10	1.7478	0.0804982	2.9085	0.00363163	3.29251	0.00267128	2.57328
IRF9	2.6052	0.00918209	2.14386	0.032044	3.35809	0.00268667	2.57079
SCML1	1.76948	0.0768144	2.88914	0.00386294	3.29414	0.00270697	2.56752
EGR2	2.21781	0.0265678	2.53071	0.0113831	3.35771	0.00275318	2.56016
ZCCHC24	2.24238	0.0249367	2.50781	0.0121482	3.35889	0.00275732	2.55951
PRDM1	2.04814	0.0405459	2.66975	0.00759084	3.33605	0.00279651	2.55338
NFIC	2.0058	0.0448772	2.65351	0.00796591	3.29463	0.00319466	2.49558
CNBP	2.65905	0.00783604	1.99491	0.0460527	3.29085	0.00322149	2.49194
ZNF503	2.15932	0.0308254	2.519	0.011769	3.30807	0.00323666	2.4899
VDR	1.88968	0.0588004	2.69526	0.00703343	3.24204	0.00363555	2.43943
GLIS3	1.97793	0.0479367	2.60318	0.00923642	3.23933	0.003862	2.41319
ERG	1.38469	0.166147	2.98606	0.00282597	3.09059	0.00406787	2.39063
SMAD7	1.59066	0.111685	2.83859	0.00453129	3.13196	0.00434662	2.36185
SPI1	2.44174	0.0146165	2.10887	0.0349562	3.21777	0.00438348	2.35818
TRIM25	1.87901	0.0602429	2.63027	0.00853159	3.18855	0.00440642	2.35591
IRF5	2.54735	0.0108545	1.93248	0.0532997	3.16772	0.00489159	2.31055
IRF1	2.40913	0.0159907	2.08358	0.0371987	3.17682	0.00501279	2.29992
SNAI1	2.00706	0.0447433	2.46087	0.01386	3.1593	0.00520025	2.28398
GATA6	2.14187	0.032204	2.32385	0.0201336	3.15774	0.00540818	2.26695
ZMAT3	2.13806	0.0325117	2.32088	0.0202936	3.15294	0.00549174	2.26029
NFKB1	1.32525	0.185088	2.90791	0.00363856	2.9933	0.00559174	2.25245
ZNF385A	2.48937	0.0127971	1.93419	0.0530892	3.12793	0.00563506	2.2491
RREB1	1.61842	0.105572	2.72452	0.00643956	3.07092	0.00563835	2.24885
MYCN	0.934872	0.349854	3.09171	0.00199005	2.84723	0.00575768	2.23975
TGIF1	2.31974	0.020355	2.10109	0.0356328	3.126	0.00596848	2.22414
MEF2C	1.80325	0.0713496	2.56834	0.0102188	3.09118	0.00599592	2.22214
MORC4	1.81204	0.0699807	2.55705	0.0105563	3.08941	0.00606544	2.21714
NR2F2	1.34728	0.177891	2.86421	0.00418053	2.97797	0.00610105	2.2146
ETV4	1.57318	0.115678	2.70877	0.00675322	3.0278	0.00637043	2.19583
ZNF57	1.36561	0.172062	2.83241	0.00461991	2.96844	0.00646842	2.1892
PRDM5	1.14347	0.252843	2.92917	0.00339867	2.87979	0.00692564	2.15954
NOTCH1	1.40093	0.161235	2.77531	0.00551498	2.95305	0.00713604	2.14654
TEAD2	1.51239	0.130434	2.69433	0.0070531	2.9746	0.00735157	2.13362
HHEX	2.21697	0.026625	2.09864	0.0358485	3.0516	0.00759216	2.11963
STAT6	1.97236	0.048569	2.33187	0.0197075	3.04355	0.007611	2.11856
MSC	1.9969	0.0458361	2.29465	0.021753	3.03459	0.00788753	2.10306
TEAD3	1.01329	0.310922	2.92171	0.00348115	2.78247	0.00847341	2.07194
THRB	1.39329	0.163531	2.71061	0.00671591	2.9019	0.00858183	2.06642
AHR	2.09002	0.0366158	2.12571	0.0335275	2.98097	0.00945607	2.02429
NR3C2	2.13415	0.0328305	2.05245	0.0401256	2.96038	0.0100541	1.99765
TAF10	2.50606	0.0122086	1.60702	0.10805	2.90839	0.010066	1.99714
HOXA4	1.67012	0.0948965	2.45188	0.0142111	2.91469	0.010261	1.98881
NR1D1	1.78889	0.0736325	2.3552	0.0185127	2.93032	0.010357	1.98476
TRIM22	2.1575	0.0309668	2.01126	0.0442982	2.94776	0.010414	1.98238
RXRA	1.63727	0.101573	2.44149	0.0146268	2.88412	0.0111603	1.95232
TBL1X	0.917971	0.358634	2.84727	0.00440962	2.66243	0.0117808	1.92883
TSC22D3	2.4364	0.0148343	1.59988	0.109624	2.85408	0.0120689	1.91833
EBF2	1.07439	0.282646	2.74345	0.00607977	2.69962	0.0126585	1.89762
CREB3L2	1.47915	0.139101	2.48902	0.0128096	2.80592	0.0130611	1.88402
FLI1	2.06638	0.0387928	1.99511	0.0460304	2.87191	0.0130852	1.88322
ETV6	1.34558	0.178438	2.54943	0.01079	2.75419	0.0139639	1.85499
HEYL	1.60136	0.109298	2.37289	0.0176497	2.81021	0.0139872	1.85427
PML	1.6461	0.0997422	2.33426	0.019582	2.81454	0.0141375	1.84963
HES1	1.36292	0.172909	2.52456	0.0115844	2.74886	0.0144481	1.84019
GATAD2A	1.41783	0.15624	2.47823	0.0132034	2.75493	0.0148192	1.82918
CCRN4L	1.52434	0.127423	2.39803	0.0164837	2.77354	0.0150506	1.82245
TP53	0.891079	0.372887	2.76327	0.00572247	2.58402	0.0152566	1.81654
NR5A2	1.26721	0.205079	2.55662	0.0105695	2.70386	0.0154638	1.81068
ZBTB7A	1.97075	0.048752	1.99345	0.0462122	2.80312	0.0159858	1.79627
NFIB	0.612813	0.54	2.85484	0.00430581	2.452	0.0164247	1.7845
MAFB	2.08808	0.0367905	1.85687	0.0633294	2.7895	0.0164537	1.78374
ELF1	1.88493	0.0594389	2.05896	0.0394976	2.78876	0.0165614	1.7809
HOXA5	1.86704	0.0618967	2.07507	0.0379797	2.78749	0.0165803	1.78041
NFIA	1.11012	0.266946	2.58018	0.00987497	2.60944	0.0182904	1.73778
BHLHE40	1.60344	0.108837	2.24572	0.0247218	2.72177	0.0186138	1.73016
HEY2	1.23511	0.216788	2.49656	0.0125404	2.63869	0.0187792	1.72632
STAT5A	1.96221	0.0497375	1.9112	0.0559787	2.73892	0.0191661	1.71747
ZNF267	2.22595	0.0260172	1.58323	0.11337	2.6935	0.020134	1.69607
CREM	1.83007	0.0672393	1.99708	0.045817	2.7062	0.0208952	1.67995
RELB	2.24249	0.0249297	1.52727	0.126693	2.66562	0.0213436	1.67073
NHLH2	1.96324	0.0496186	1.85327	0.0638437	2.69868	0.0213978	1.66963
USF2	1.9618	0.0497859	1.82579	0.0678817	2.67823	0.0226092	1.64571
NME2	1.20458	0.228367	2.42555	0.0152853	2.56689	0.0232397	1.63377
GLI3	1.35918	0.174091	2.3171	0.0204984	2.59952	0.0236797	1.62562
TCFL5	2.33586	0.0194984	1.32537	0.185049	2.58888	0.0239024	1.62156
NR1H3	2.30702	0.0210539	1.35712	0.174743	2.59093	0.0243004	1.61439
KLF9	1.72303	0.084884	2.00821	0.0446215	2.63838	0.0249076	1.60367
TCF7L1	1.17764	0.238941	2.41195	0.0158674	2.53822	0.0249285	1.6033
BCL6B	1.33576	0.181627	2.26377	0.0235884	2.54525	0.0276457	1.55837
NRK	1.30879	0.190607	2.28062	0.0225711	2.53809	0.0277433	1.55684
FOXC1	1.62417	0.104339	2.03086	0.0422695	2.5845	0.0283313	1.54773
DLX6	1.29585	0.195026	2.273	0.0230264	2.52356	0.0287666	1.54111
NFATC2	1.71387	0.0865533	1.92885	0.0537489	2.57579	0.0296361	1.52818
TCF21	1.81253	0.0699043	1.83391	0.066667	2.57842	0.02968	1.52754
MECOM	1.01324	0.310946	2.42098	0.0154788	2.42836	0.0304976	1.51573
HOXA2	1.47219	0.14097	2.10908	0.0349374	2.53234	0.0310944	1.50732
MAFK	1.43846	0.150305	2.13328	0.032902	2.5256	0.0312015	1.50582
ZBTB7B	2.36134	0.0182091	1.07276	0.28338	2.42827	0.0323373	1.4903
ELK1	1.86524	0.0621473	1.72358	0.0847834	2.53768	0.03291	1.48267
BAZ1A	1.13147	0.257856	2.3177	0.0204654	2.43894	0.0329524	1.48211
CEBPA	2.29652	0.0216464	1.16363	0.244575	2.44669	0.0330418	1.48094
ETV1	1.16602	0.243608	2.28706	0.0221924	2.44169	0.033628	1.4733
TWIST1	1.00616	0.314339	2.37854	0.0173815	2.39334	0.0339275	1.46945
DLX5	1.13335	0.257068	2.29766	0.0215814	2.42609	0.0343654	1.46388
CEBPG	2.34398	0.0190792	0.979708	0.32723	2.3502	0.0379358	1.42095
C14orf43	1.10903	0.267416	2.25812	0.0239379	2.38094	0.0387362	1.41188
NFE2L2	1.94218	0.0521157	1.52822	0.126457	2.45394	0.0396883	1.40134
TFEC	1.92988	0.0536219	1.49786	0.134169	2.42378	0.0426949	1.36962
ZNF114	1.35102	0.17669	2.03515	0.0418362	2.39438	0.0436673	1.35984
NOTCH3	0.899553	0.368358	2.318	0.0204496	2.27515	0.0443567	1.35304
KLF2	1.98865	0.0467401	1.37998	0.167592	2.38198	0.0458197	1.33895
ZNF276	2.11126	0.0347501	1.19255	0.233047	2.33614	0.047101	1.32697
FOXO1	1.75936	0.0785159	1.62698	0.10374	2.39451	0.0473266	1.32489
ZNF581	1.30507	0.191867	2.00808	0.0446343	2.34276	0.0493296	1.30689
IRF3	2.10786	0.0350429	1.16359	0.244588	2.31327	0.049364	1.30659
YY1	1.97997	0.0477069	1.32163	0.186293	2.33458	0.0508639	1.29359
ZC3H12A	1.82602	0.067848	1.50015	0.133574	2.35196	0.0516901	1.28659
BACH1	2.1508	0.0314917	1.03828	0.299141	2.25502	0.0533657	1.27274
JUNB	1.82331	0.0682568	1.47732	0.139589	2.3339	0.0538663	1.26868
HOXA7	1.07176	0.283828	2.11065	0.0348021	2.25031	0.0554882	1.2558
MYC	2.14547	0.0319152	0.972997	0.330555	2.20509	0.0585684	1.23234
ZNF467	2.15996	0.0307757	0.920583	0.357268	2.17827	0.0605867	1.21762
BCL3	1.59747	0.110161	1.63616	0.101807	2.28652	0.0615766	1.21058
ZNF227	1.54877	0.121438	1.67701	0.0935409	2.28097	0.0622235	1.20605
HLX	1.62154	0.104902	1.57946	0.114231	2.26345	0.064999	1.18709
ZNF169	1.19698	0.231313	1.94212	0.0521222	2.21968	0.0653241	1.18493
KLF6	1.48924	0.136423	1.70218	0.0887213	2.25668	0.0655322	1.18355
ZNF366	1.32516	0.185118	1.83822	0.0660306	2.23685	0.0660604	1.18006
CITED1	1.3253	0.185071	1.82911	0.0673824	2.23051	0.0671462	1.17298
JDP2	1.63473	0.102106	1.52948	0.126145	2.23744	0.0689353	1.16156
ESR1	1.84525	0.0650011	1.27221	0.2033	2.20438	0.0703871	1.15251
RFXANK	1.41082	0.158296	1.7284	0.0839168	2.21977	0.0706856	1.15067
HIC1	1.66621	0.0956709	1.46718	0.142327	2.21564	0.0721197	1.14195
MAFF	1.58172	0.113713	1.55181	0.120708	2.21574	0.0725897	1.13912
ZNF844	2.42861	0.0151568	0.0539186	0.957	1.75541	0.0759088	1.11971
SOX18	1.78346	0.0745108	1.28017	0.200487	2.16631	0.0777369	1.10937
SIX4	1.15509	0.248055	1.87284	0.0610899	2.14107	0.0786401	1.10436
MEOX2	1.2047	0.228318	1.8284	0.06749	2.14473	0.0797084	1.0985
SOX13	1.05055	0.293466	1.93759	0.0526732	2.11293	0.0799114	1.09739
ZNF219	1.44857	0.147458	1.59928	0.109758	2.15516	0.0829253	1.08131
KLF4	1.4092	0.158776	1.63479	0.102093	2.15243	0.0830291	1.08077
PGR	2.20606	0.0273795	0.520091	0.603	1.92768	0.0842629	1.07436
ELK4	1.43563	0.151107	1.60132	0.109305	2.14745	0.0842917	1.07422
FOXS1	1.5454	0.12225	1.49169	0.135781	2.14754	0.0846293	1.07248
JUND	1.80555	0.0709881	1.18335	0.236671	2.11347	0.0854544	1.06827
ESRRA	1.91267	0.0557909	1.03292	0.301642	2.08284	0.0855691	1.06768
ETV5	1.2503	0.21119	1.74067	0.0817418	2.11493	0.0873369	1.0588
NFATC3	1.6394	0.101129	1.3549	0.175449	2.11729	0.0892787	1.04925
ZFYVE21	1.75867	0.0786333	1.19659	0.231468	2.08968	0.0911196	1.04039
SRF	-0.126925	0.899	2.31402	0.0206667	1.54651	0.0926311	1.03324
FOXP2	1.64803	0.0993467	1.31152	0.189682	2.09272	0.0936852	1.02833
NFATC1	1.49995	0.133627	1.4644	0.143084	2.09611	0.0947778	1.02329
CSRNP1	1.37277	0.169824	1.58529	0.112901	2.09166	0.0949892	1.02233
IRX3	2.13987	0.0323652	0.531604	0.595	1.88902	0.0953209	1.02081
TFE3	1.43752	0.15057	1.51433	0.129942	2.08728	0.0965351	1.01531
KLF8	1.10856	0.267622	1.76825	0.0770194	2.03421	0.100626	0.997291
HCLS1	1.4546	0.145781	1.46637	0.142549	2.06543	0.10128	0.994475
SOX9	1.73971	0.0819097	1.14039	0.254123	2.03654	0.101413	0.993906
VAV1	1.62466	0.104234	1.2819	0.199878	2.05525	0.101486	0.993593
SOX7	1.39193	0.163944	1.50544	0.132212	2.04875	0.104726	0.979945
ZFP36	1.43967	0.149962	1.45202	0.146496	2.04473	0.105849	0.975315
ZNF536	0.407011	0.684	2.14265	0.032141	1.80288	0.105908	0.97507
HOXB3	1.39815	0.162069	1.4843	0.13773	2.0382	0.107193	0.969833
TCF3	1.026	0.304891	1.78976	0.0734924	1.99104	0.107518	0.968519
ERF	1.12155	0.262052	1.71728	0.0859279	2.00736	0.107937	0.96683
PKNOX2	-0.40293	0.687	2.11861	0.0341237	1.21317	0.111429	0.953003
KLF16	1.19585	0.231756	1.59882	0.109862	1.97613	0.118919	0.924751
ZDHHC1	1.01491	0.31015	1.73643	0.0824873	1.94549	0.119367	0.923114
HOXB7	1.91714	0.0552207	0.730341	0.465182	1.87205	0.119749	0.921727
SOX17	1.03688	0.299793	1.69821	0.0894673	1.934	0.123877	0.907009
ZBTB25	1.88221	0.0598069	0.749698	0.453436	1.86104	0.12495	0.903263
TAL1	1.43435	0.151473	1.33292	0.182557	1.95676	0.126871	0.896639
ZDHHC7	1.42979	0.152777	1.325	0.185172	1.94793	0.129151	0.888902
GAS7	1.13204	0.257617	1.59657	0.110361	1.92942	0.129653	0.887219
RCAN1	1.42622	0.153805	1.32596	0.184851	1.94609	0.129654	0.887215
DRAP1	1.82148	0.0685337	0.805829	0.420342	1.85779	0.130991	0.882757
AFF1	0.734413	0.462697	1.86127	0.0627058	1.83543	0.131722	0.880341
ZNF330	0.121872	0.903	2.13861	0.0324674	1.5984	0.132798	0.876809
MEOX1	1.4225	0.15488	1.30985	0.190247	1.93207	0.133317	0.875113
ETS1	1.27633	0.20184	1.44731	0.147809	1.9259	0.134613	0.870912
ZNF274	1.79317	0.0729459	0.813157	0.416128	1.84295	0.136439	0.865062
ZNF185	1.141	0.253868	1.54854	0.121493	1.90179	0.138142	0.859674
NFKB2	1.29719	0.194566	1.39909	0.161786	1.90656	0.140344	0.852806
YY2	0.921006	0.357048	1.70387	0.0884051	1.85607	0.140644	0.85188
TBX3	-0.515792	0.606	1.92798	0.053858	0.998566	0.144334	0.840631
NPAS4	0.434397	0.664	1.96621	0.0492747	1.69748	0.144609	0.839803
SMAD6	1.37264	0.169865	1.27235	0.203249	1.87029	0.150739	0.821776
RELA	1.11397	0.265292	1.50948	0.131175	1.85506	0.151663	0.819122
SIX2	0.605269	0.545	1.84267	0.0653773	1.73095	0.154443	0.811233
NR1D2	1.43921	0.150092	1.15903	0.246445	1.83723	0.158948	0.798744
MEF2B	1.90449	0.0568468	0.426148	0.67	1.64801	0.162552	0.789008
IRF2	1.25185	0.210623	1.32781	0.184242	1.8241	0.164892	0.7828
TAF1D	0.394787	0.693	1.91029	0.0560963	1.62993	0.165117	0.782209
HSF1	2.03813	0.0415369	0.0526635	0.958	1.47841	0.168086	0.774468
ZFYVE28	1.12515	0.260526	1.40938	0.158721	1.79219	0.173082	0.761749
ZNF239	0.490189	0.624	1.83377	0.0666883	1.64329	0.173917	0.759659
ZFAT	0.898506	0.368916	1.5624	0.118195	1.74012	0.180198	0.744251
SCRT2	0.801985	0.422562	1.62212	0.104777	1.7141	0.182294	0.739227
IRF7	1.41241	0.15783	1.07212	0.283665	1.75683	0.183838	0.735565
ETS2	1.60125	0.109322	0.822615	0.410727	1.71393	0.184244	0.734608
NR3C1	1.49727	0.134323	0.961202	0.336451	1.7384	0.185148	0.732481
SPIC	1.38909	0.164806	1.09284	0.274465	1.75499	0.185272	0.732189
AR	1.39899	0.161816	1.07668	0.281625	1.75056	0.186317	0.729747
MRRF	0.285841	0.775	1.88652	0.0592245	1.53609	0.187328	0.727397
ZFP36L2	1.09613	0.27302	1.37573	0.168905	1.74787	0.187991	0.725862
NAT14	1.91292	0.0557587	0.199336	0.842	1.49359	0.190551	0.719989
ENO1	0.940494	0.346964	1.48798	0.136755	1.71719	0.192079	0.71652
MEF2A	1.38823	0.165068	1.06134	0.288533	1.73211	0.192623	0.715293
HOXD9	0.219835	0.826	1.89269	0.0583995	1.49378	0.194477	0.711133
HOXD8	1.32077	0.186579	1.12327	0.261322	1.7282	0.196048	0.707638
ZNF295	1.11303	0.265697	1.32289	0.18587	1.72246	0.197941	0.703464
LHX6	1.60633	0.108201	0.743012	0.457474	1.66124	0.198283	0.702714
E2F4	1.42317	0.154687	0.979774	0.327198	1.69914	0.20162	0.695466
ZC3HAV1	0.609791	0.542	1.66899	0.0951201	1.61134	0.204421	0.689474
ATF4	1.68711	0.0915831	0.57691	0.564	1.6009	0.204711	0.688859
ZBTB1	1.54465	0.12243	0.793011	0.427771	1.65298	0.206838	0.68437
IRF8	1.23667	0.216209	1.16471	0.244138	1.69803	0.208053	0.681826
FOXC2	1.59572	0.110551	0.700907	0.483361	1.62396	0.209965	0.677853
BHLHE41	1.0631	0.287739	1.31853	0.187327	1.68406	0.211326	0.675048
ZDHHC22	0.711896	0.476529	1.57386	0.11552	1.61627	0.214664	0.668241
ZNF556	0.422034	0.673	1.74005	0.0818499	1.52883	0.21477	0.668027
PCGF6	1.5833	0.113353	0.686364	0.492483	1.6049	0.216908	0.663725
ATF1	1.69447	0.0901768	0.478914	0.632	1.53681	0.220264	0.657056
ETV3	1.21245	0.225342	1.12975	0.258583	1.65618	0.223911	0.649924
E2F3	0.455152	0.649	1.67797	0.0933531	1.50834	0.230451	0.637422
HOPX	1.28174	0.199934	1.01228	0.311402	1.62212	0.235121	0.628709
ZNF121	0.469097	0.639	1.64151	0.100691	1.49243	0.240866	0.618225
NOTCH4	0.285841	0.775	1.73117	0.0834211	1.42624	0.241715	0.616696
DDIT3	1.60644	0.108178	-0.522963	0.601	0.766131	0.24271	0.614912
TAF5L	0.75715	0.44896	1.45084	0.146825	1.56128	0.245173	0.610528
ZNF333	1.26579	0.20559	0.980639	0.326771	1.58846	0.248594	0.60451
TFAP4	-0.471897	0.637	1.59878	0.109868	0.79683	0.256112	0.591571
BATF	1.6344	0.102174	0.40565	0.685	1.44254	0.25612	0.591557
ZFP106	0.932678	0.350986	1.274	0.202665	1.56035	0.259151	0.586447
HMGA1	0.897247	0.369587	1.30095	0.193277	1.55436	0.259944	0.585121
ATF6	1.32925	0.183766	0.856556	0.39169	1.5456	0.261384	0.58272
ZNF703	1.45888	0.144598	0.676959	0.498432	1.51027	0.261628	0.582315
ZNF576	1.41957	0.155734	0.700236	0.48378	1.49893	0.270153	0.568391
DBP	1.3991	0.161783	0.69974	0.484089	1.4841	0.277791	0.556281
MSL3	0.483135	0.629	1.52881	0.126311	1.42266	0.280666	0.55181
IRX5	1.19213	0.233212	0.949407	0.342414	1.51429	0.281692	0.550226
ZNF460	1.0603	0.28901	1.08416	0.278295	1.51636	0.283143	0.547994
KLF10	0.928606	0.353094	1.16081	0.245717	1.47744	0.298857	0.524536
EOMES	1.41365	0.157465	0.596262	0.551	1.42122	0.298862	0.524529
ZDHHC5	1.20012	0.230092	0.87106	0.383721	1.46455	0.302584	0.519154
TSC22D4	1.09958	0.271513	0.981866	0.326166	1.47181	0.303232	0.518225
LZTFL1	0.620392	0.535	1.38558	0.165876	1.41843	0.303681	0.517582
MRPL28	1.31718	0.187779	0.716151	0.473898	1.43778	0.304273	0.516736
ZNF410	1.29582	0.195039	0.715344	0.474397	1.4221	0.312762	0.504786
ZNF597	1.33236	0.182742	0.649524	0.516	1.4014	0.316956	0.499001
TAF7	0.846772	0.397122	1.17895	0.238417	1.4324	0.317866	0.497756
RNF6	1.28261	0.199629	0.693264	0.488144	1.39715	0.324349	0.488988
AKNA	1.09826	0.272091	0.911065	0.362261	1.42081	0.326951	0.485517
ZNF667	-0.463508	0.643	1.42656	0.153707	0.68098	0.327566	0.484701
MLX	1.37101	0.170371	-0.540286	0.589	0.587413	0.33106	0.480093
ZNF700	0.981343	0.326424	1.0119	0.311588	1.40943	0.33418	0.476019
VENTX	1.33072	0.183282	0.587303	0.557	1.35625	0.335044	0.474898
PFDN1	1.46059	0.144127	0.361133	0.718	1.28816	0.338219	0.470802
SOHLH2	1.17875	0.238497	0.781383	0.434577	1.38602	0.338587	0.47033
HOXB4	0.832033	0.40539	1.13402	0.256787	1.39021	0.339614	0.469014
TEF	1.6115	0.107071	0.0238152	0.981	1.15634	0.34173	0.466317
ATOH8	1.24475	0.213224	0.663516	0.507	1.34935	0.3486	0.457673
ATF3	0.774162	0.438835	1.14893	0.250585	1.35983	0.352724	0.452564
RUNX3	1.27113	0.203683	0.611301	0.541	1.33108	0.353226	0.451948
ZNF593	1.38099	0.167281	-0.427521	0.669	0.674207	0.357002	0.44733
HOXA3	1.10795	0.267885	0.801676	0.422741	1.35031	0.359917	0.443797
IRF4	1.20944	0.226494	0.665079	0.506	1.32548	0.362872	0.440246
ZNF639	0.807752	0.419233	1.0894	0.275978	1.34149	0.365235	0.437428
ZNF621	0.248174	0.804	1.44402	0.148734	1.19656	0.373544	0.427658
CREB3L4	-0.723974	0.469082	1.12082	0.262366	0.280611	0.380904	0.419185
ZNF434	1.4183	0.156104	0.253347	0.8	1.18203	0.384688	0.414891
ZNF496	-0.192948	0.847	1.44615	0.148135	0.886147	0.385908	0.413516
VAX2	0.899604	0.368331	0.944408	0.344961	1.30391	0.389197	0.409831
ZNF101	1.08517	0.277846	0.741712	0.458262	1.2918	0.389746	0.409219
PLAG1	1.17703	0.239185	0.623433	0.533	1.27312	0.390075	0.408852
PA2G4	-0.547551	0.584	1.22869	0.219187	0.48164	0.391143	0.407664
ZNF430	1.51801	0.129013	0.00125331	0.999	1.07428	0.392947	0.405666
PPARA	0.079041	0.937	1.48144	0.138488	1.10343	0.394746	0.403683
ZNF41	0.979359	0.327402	0.846785	0.397115	1.29128	0.395262	0.403115
GLI2	1.15151	0.249521	0.638728	0.523	1.26589	0.396246	0.402035
SP140	1.19041	0.233886	0.581357	0.561	1.25283	0.397692	0.400453
UBP1	-0.140835	0.888	1.43563	0.151108	0.915557	0.403698	0.393943
NFXL1	-0.811382	0.417146	0.978253	0.327949	0.117996	0.408933	0.388348
MKX	1.33823	0.180821	0.306794	0.759	1.16321	0.409808	0.387419
MEF2D	0.75196	0.452075	1.01703	0.309141	1.25086	0.414774	0.382189
SCAND1	1.20724	0.227338	0.478914	0.632	1.19229	0.422439	0.374236
ZCCHC2	1.07389	0.282871	0.652622	0.514	1.22083	0.425762	0.370833
ZNF649	-0.0250689	0.98	1.43955	0.149994	1.00019	0.428835	0.36771
ZDHHC20	1.27206	0.203351	0.351784	0.725	1.14823	0.429669	0.366866
ZDHHC9	-0.350451	0.726	1.2717	0.20348	0.651421	0.430237	0.366292
MAEL	1.16828	0.242692	0.511501	0.609	1.18779	0.430377	0.366151
ZDHHC24	1.03607	0.300168	0.68232	0.495037	1.21509	0.431894	0.364623
FOXO4	1.09604	0.273062	0.602262	0.547	1.20088	0.433362	0.363149
ZDHHC12	1.14351	0.252826	0.537387	0.591	1.18858	0.433467	0.363044
KLF3	-0.534494	0.593	1.13984	0.254352	0.428045	0.436142	0.360372
ZBTB3	0.95574	0.339204	-0.761347	0.44645	0.137457	0.437288	0.359232
ECSIT	0.584327	0.559	1.09888	0.27182	1.19021	0.43825	0.358278
TAF9B	0.911551	0.362005	0.802621	0.422194	1.2121	0.439922	0.356624
TRPS1	0.533049	0.594	1.12833	0.259179	1.17478	0.442014	0.354564
MTA2	0.925752	0.354575	0.779365	0.435765	1.2057	0.443059	0.353538
FOXF1	1.21888	0.22289	0.38532	0.7	1.13434	0.445875	0.350787
ZNF259	-0.150969	0.88	1.34824	0.17758	0.8466	0.446335	0.350339
RRN3	0.897032	0.369702	0.79267	0.42797	1.1948	0.449944	0.346842
HIF3A	1.17052	0.241793	0.435775	0.663	1.13582	0.453779	0.343156
ZNF584	1.17673	0.239302	0.389373	0.697	1.1074	0.46552	0.332061
ZNF747	1.32457	0.185314	-0.113039	0.91	0.856681	0.46881	0.329003
ZBTB11	1.01267	0.311218	0.609791	0.542	1.14725	0.468889	0.32893
ZBTB33	0.683143	0.494516	0.940896	0.346758	1.14837	0.473844	0.324364
IFT57	0.842495	0.399511	0.784475	0.432762	1.15044	0.476334	0.322088
ZNF689	1.19785	0.230977	-0.287147	0.774	0.643961	0.486561	0.312862
SOX10	0.680218	0.496366	0.913583	0.360936	1.12699	0.487215	0.312279
ZNF619	-0.084071	0.933	1.301	0.193259	0.860497	0.489197	0.310516
ZNF385B	0.944339	0.344996	0.624956	0.532	1.10966	0.494696	0.305661
ZGLP1	1.22034	0.222335	0.214702	0.83	1.01473	0.496388	0.304178
GABPB2	0.493018	0.622	1.03623	0.300094	1.08134	0.49996	0.301065
ZNF511	0.969393	0.332349	0.578391	0.563	1.09445	0.500722	0.300404
BNC1	1.23274	0.217674	0.16747	0.867	0.990096	0.503414	0.298074
ZNF22	1.05898	0.289607	0.448212	0.654	1.06575	0.504546	0.297099
THAP11	0.883671	0.376874	0.663516	0.507	1.09403	0.507321	0.294717
HOXD4	0.525839	0.599	0.984202	0.325016	1.06776	0.513262	0.289661
ZNF497	1.20348	0.22879	-0.184017	0.854	0.72087	0.514409	0.288691
ALX4	1.16422	0.244335	-0.246881	0.805	0.648656	0.516532	0.286903
CBFA2T3	1.20898	0.22667	0.157311	0.875	0.966114	0.519204	0.284662
SOLH	0.878847	0.379484	0.637192	0.524	1.072	0.520033	0.283969
ZNF28	0.973022	0.330542	0.517224	0.605	1.05376	0.521852	0.282452
LYL1	1.17044	0.241826	0.215984	0.829	0.980347	0.522649	0.28179
FOXD3	0.867557	0.385637	0.643345	0.52	1.06837	0.522742	0.281713
LEF1	0.825902	0.40886	0.686223	0.492572	1.06923	0.524124	0.280566
PBX4	0.862373	0.388482	-0.638728	0.523	0.158141	0.526974	0.27821
IKZF1	0.925685	0.35461	0.559237	0.576	1.05	0.528691	0.276798
ZNF92	0.879601	0.379076	-0.611301	0.541	0.189716	0.53	0.275725
ZDHHC3	0.612813	0.54	0.872332	0.383027	1.05016	0.532772	0.273458
ZFX	0.338482	0.735	1.06531	0.286733	0.992634	0.538904	0.268489
UBN1	0.302855	0.762	1.0862	0.277391	0.98221	0.539872	0.267709
RFX2	0.661955	0.508	0.807325	0.419479	1.03894	0.542544	0.265565
TCEAL1	1.04725	0.294983	0.354452	0.723	0.991155	0.542818	0.265346
PPARD	0.252053	0.801	1.10858	0.267611	0.962114	0.544489	0.264011
YBX2	1.1862	0.235544	0.109255	0.913	0.916024	0.54556	0.263158
ARNTL	0.728741	0.46616	0.729812	0.465505	1.03135	0.548545	0.260788
FOSL1	1.10799	0.267866	0.232693	0.816	0.948006	0.550952	0.258887
ST18	0.500107	0.617	0.918566	0.358322	1.00315	0.554748	0.255904
RCOR2	0.240426	0.81	1.09575	0.273188	0.94482	0.555046	0.255671
ZMAT1	0.713717	0.475402	0.72272	0.469852	1.01571	0.558183	0.253224
NOLC1	0.401571	0.688	0.983814	0.325207	0.979615	0.558743	0.252788
WT1	1.01752	0.308908	0.350451	0.726	0.9673	0.559528	0.252178
BCL6	0.635657	0.525	0.791231	0.428809	1.00896	0.560808	0.251185
BATF2	1.13882	0.254778	-0.1459	0.884	0.702101	0.560955	0.251072
SOX8	1.17601	0.23959	0.0714998	0.943	0.882124	0.562013	0.250254
ADNP2	0.811792	0.416911	0.609791	0.542	1.00521	0.562061	0.250217
FOXE3	1.18755	0.23501	0.0451346	0.964	0.871641	0.562929	0.249547
CGGBP1	0.944155	0.34509	0.426148	0.67	0.968951	0.569801	0.244276
FOXI2	1.19073	0.233761	-0.0125335	0.99	0.833108	0.570114	0.244039
HNRNPAB	-0.331853	0.74	1.00061	0.317014	0.472885	0.574726	0.240539
ZNF521	0.417928	0.676	0.937206	0.348652	0.958224	0.576317	0.239339
HKR1	-0.125661	0.9	1.11933	0.263	0.702628	0.577776	0.23824
ZNHIT6	-0.69423	0.487538	0.696812	0.48592	0.0018259	0.57807	0.238019
IKZF3	0.855931	0.392036	0.51436	0.607	0.968942	0.579596	0.236874
RXRG	0.658838	0.51	0.727539	0.466896	0.980316	0.579813	0.236712
ZNF768	0.992379	0.321013	0.322598	0.747	0.929829	0.582217	0.234915
KDM5C	0.302855	0.762	0.99884	0.317872	0.920437	0.585664	0.232351
PAX5	0.90552	0.36519	0.43302	0.665	0.946491	0.58656	0.231687
ZNF77	-0.293683	0.769	1.00283	0.315944	0.501441	0.586716	0.231572
PRDM16	0.97767	0.328238	0.329206	0.742	0.924101	0.587551	0.230954
RBPJ	0.156042	0.876	1.07899	0.280591	0.873301	0.590713	0.228624
ZNF561	0.870002	0.384299	0.467699	0.64	0.945897	0.590928	0.228465
ZBED3	0.971485	0.331307	0.314686	0.753	0.90946	0.595844	0.224867
HOXD1	1.11787	0.263624	0.061451	0.951	0.833903	0.597552	0.223624
EMX2	1.0509	0.293303	0.180194	0.857	0.870517	0.598456	0.222968
ZNF598	0.599259	0.549	0.739623	0.459529	0.946733	0.599726	0.222047
FOXA1	1.13516	0.256309	-0.0162938	0.987	0.791157	0.600683	0.221355
CEBPZ	0.293683	0.769	0.973511	0.3303	0.896041	0.602088	0.22034
TADA3	0.232693	0.816	1.01232	0.311384	0.880359	0.602209	0.220253
ZNF124	0.383971	0.701	0.897299	0.36956	0.905994	0.608973	0.215402
SOX30	1.11752	0.263772	0.021308	0.983	0.805272	0.609279	0.215183
ZNF654	0.961955	0.336072	0.287147	0.774	0.883249	0.6104	0.214385
CTBP1	-0.52872	0.597	0.778279	0.436404	0.176465	0.610957	0.213989
TP63	0.688144	0.491362	0.620392	0.535	0.925274	0.614101	0.21176
ARNTL2	0.287147	0.774	0.953733	0.340219	0.877435	0.614703	0.211335
ZNF554	1.07471	0.282502	-0.0828133	0.934	0.70138	0.615407	0.210838
SUPT4H1	1.0361	0.300155	0.150969	0.88	0.839385	0.615779	0.210575
ZNF567	0.786365	0.431654	0.49585	0.62	0.906663	0.6204	0.207328
T	0.818553	0.413041	-0.446827	0.655	0.26285	0.624229	0.204656
ASCL1	-0.138304	0.89	1.02467	0.30552	0.626753	0.626018	0.203413
NFYA	-0.262417	0.793	0.943805	0.345269	0.481814	0.628467	0.201718
HEY1	-0.150969	0.88	1.00696	0.313953	0.605279	0.631668	0.199511
GLI1	0.982175	0.326014	-0.190395	0.849	0.559873	0.63232	0.199063
ZCCHC4	0.345126	0.73	0.879035	0.379382	0.865612	0.63253	0.198919
HOXB6	0.759117	0.447782	0.497268	0.619	0.888399	0.632823	0.198718
MAX	0.411099	0.681	0.824861	0.40945	0.873956	0.634946	0.197263
MNX1	0.859701	0.389954	0.361133	0.718	0.86326	0.636414	0.19626
PAX2	0.7702	0.441181	-0.470497	0.638	0.211922	0.638303	0.194973
ZNF562	0.455152	0.649	0.782739	0.43378	0.875321	0.638366	0.194931
SPIB	0.813945	0.415677	0.413828	0.679	0.868167	0.639278	0.19431
BARHL1	1.06771	0.285653	0.00751996	0.994	0.7603	0.641417	0.192859
SP6	0.894551	0.371027	-0.294992	0.768	0.423952	0.642687	0.192001
SNAPC5	0.960203	0.336953	0.194225	0.846	0.816303	0.642829	0.191904
ZNF395	-0.588793	0.556	0.654174	0.513	0.0462309	0.643037	0.191764
ZNF506	0.688247	0.491298	0.551925	0.581	0.876933	0.643308	0.191581
DMRTC2	0.709755	0.477856	-0.521527	0.602	0.133098	0.646089	0.189708
SIX5	0.949667	0.342281	0.200615	0.841	0.813372	0.646325	0.189549
ZMYND15	1.00827	0.313323	-0.0966555	0.923	0.644611	0.647989	0.188432
TLX3	0.593271	0.553	0.623433	0.533	0.860339	0.654824	0.183876
GATA5	0.746755	0.455211	-0.453762	0.65	0.207177	0.656212	0.182956
STAT2	0.441294	0.659	0.756501	0.449349	0.846969	0.656496	0.182768
AATF	-0.0815557	0.935	0.992886	0.320766	0.644408	0.66109	0.179739
POU2F3	0.867701	0.385558	-0.279319	0.78	0.416049	0.662076	0.179092
ZNF697	1.00418	0.315294	0.0539186	0.957	0.748186	0.663277	0.178305
ZNHIT2	0.995555	0.319467	-0.0627068	0.95	0.659623	0.665377	0.176932
ZFPM1	1.0043	0.315232	-0.0463893	0.963	0.677348	0.665467	0.176874
RAX	0.880725	0.378467	-0.249466	0.803	0.446367	0.665873	0.176609
ETV7	-0.0225616	0.982	1.01536	0.309932	0.702017	0.666402	0.176264
ALX3	0.885285	0.376003	-0.237847	0.812	0.457808	0.667543	0.17552
MIXL1	0.957728	0.3382	0.121872	0.903	0.763393	0.667639	0.175459
BRPF1	-0.531604	0.595	0.649524	0.516	0.0833814	0.669562	0.174209
LHX2	0.928361	0.35322	0.162388	0.871	0.771276	0.670311	0.173724
ZNF480	0.658838	0.51	0.507221	0.612	0.824528	0.675542	0.170347
HOXA11	0.77682	0.437265	-0.366489	0.714	0.290148	0.675644	0.170282
FOXP3	0.786795	0.431402	-0.351784	0.725	0.307599	0.676295	0.169864
TRIM28	0.137039	0.891	0.9315	0.351595	0.755571	0.676881	0.169488
SREBF1	-0.170013	0.865	0.910757	0.362423	0.523785	0.677142	0.16932
PRKDC	-0.119348	0.905	0.941109	0.346649	0.581073	0.677398	0.169156
ZBBX	0.504372	0.614	0.654174	0.513	0.819215	0.678862	0.168219
PRDM15	0.768017	0.442477	0.365149	0.715	0.801269	0.680464	0.167195
ZNF524	0.995236	0.319622	0.0112801	0.991	0.711714	0.680893	0.166921
ZNF575	0.978252	0.32795	-0.0401168	0.968	0.663362	0.681709	0.166401
NFIL3	0.786177	0.431764	0.330529	0.741	0.789631	0.684547	0.164597
ZNF146	-0.0413712	0.967	0.972196	0.330953	0.658192	0.684655	0.164528
TFAP2A	0.266311	0.79	0.827953	0.407697	0.773761	0.686983	0.163054
HES6	0.722813	0.469795	0.398855	0.69	0.793139	0.68933	0.161573
TAF13	0.748895	0.453921	0.365149	0.715	0.787748	0.689775	0.161293
MYOD1	0.908741	0.363487	-0.134509	0.893	0.547464	0.689821	0.161264
ZNF296	0.59776	0.55	-0.53594	0.592	0.0437134	0.690951	0.160553
TLX2	0.579873	0.562	0.543189	0.587	0.794125	0.695741	0.157552
SOX3	0.846913	0.397043	0.213419	0.831	0.749768	0.695796	0.157518
IRX1	0.817824	0.413458	-0.25076	0.802	0.400975	0.697621	0.15638
EMX1	0.881462	0.378068	0.150969	0.88	0.730039	0.698841	0.155622
BARX1	0.941484	0.346457	0.0463893	0.963	0.698532	0.699872	0.154981
ZNF695	-0.358459	0.72	0.732728	0.463724	0.264648	0.700139	0.154816
ZNF263	0.287147	0.774	0.786647	0.431489	0.759287	0.700239	0.154754
HNF1A	0.708652	0.478541	-0.383971	0.701	0.229584	0.701864	0.153747
ZNF787	0.663516	0.507	0.437154	0.662	0.778291	0.702057	0.153628
ZFP91	0.375888	0.707	0.710616	0.477322	0.768275	0.704053	0.152395
ZNF317	0.191671	0.848	0.840487	0.400635	0.729846	0.706513	0.15088
ZNF350	-0.0639626	0.949	0.918549	0.358332	0.604284	0.706856	0.150669
ZNF616	-0.524401	0.6	0.568051	0.57	0.0308659	0.708947	0.149386
BARX2	0.911169	0.362206	-0.0664746	0.947	0.597289	0.710028	0.148724
STAT4	0.697995	0.48518	0.375888	0.707	0.75935	0.710043	0.148716
SP8	0.811623	0.417008	-0.217267	0.828	0.420273	0.712454	0.147243
ASCL2	0.919167	0.358008	-0.0401168	0.968	0.621582	0.713801	0.146423
ZCCHC7	0.079041	0.937	0.889711	0.373621	0.685011	0.717525	0.144163
ZNF45	0.740928	0.458737	0.300232	0.764	0.736211	0.717936	0.143914
DLX4	0.566579	0.571	-0.501527	0.616	0.0459987	0.719256	0.143117
ZNF8	-0.0300841	0.976	0.913973	0.360731	0.625004	0.719608	0.142904
TFAP2C	0.70053	0.483596	0.343796	0.731	0.73845	0.721104	0.142002
FOXL1	0.785564	0.432123	-0.221119	0.825	0.399123	0.724203	0.14014
PURA	0.685689	0.492909	-0.353118	0.724	0.235163	0.724579	0.139914
ZMYND19	-0.252053	0.801	0.758072	0.448408	0.357809	0.72695	0.138495
SP5	0.898398	0.368973	-0.0250689	0.98	0.617537	0.729419	0.137023
ZNF35	-0.456542	0.648	0.582842	0.56	0.089307	0.730725	0.136246
ZNF7	0.487365	0.626	0.544642	0.586	0.729739	0.734714	0.133882
ZNF280C	-0.123135	0.902	0.829025	0.40709	0.499139	0.735074	0.133669
CNOT8	0.772892	0.439586	-0.204452	0.838	0.401947	0.736252	0.132973
BBX	0.654174	0.513	0.350451	0.726	0.710377	0.740289	0.130599
OVOL2	0.594766	0.552	-0.415194	0.678	0.126977	0.74208	0.129549
CDKN2A	0.741182	0.458583	0.215984	0.829	0.676819	0.747842	0.12619
GCFC1	0.777705	0.436743	-0.15858	0.874	0.437788	0.749336	0.125323
FOXI1	0.687736	0.491619	-0.280622	0.779	0.287873	0.750545	0.124623
E2F5	-0.203173	0.839	0.744512	0.456567	0.382784	0.75063	0.124574
ZNF200	-0.0627068	0.95	0.831859	0.405488	0.543873	0.752691	0.123383
PITX2	0.696622	0.486039	0.26112	0.794	0.677226	0.753359	0.122998
JUN	0.695765	0.486576	-0.259823	0.795	0.308257	0.754227	0.122498
ZNF557	0.725822	0.467948	0.218551	0.827	0.667772	0.754384	0.122407
STRN3	0.602262	0.547	0.366489	0.714	0.68501	0.757752	0.120473
OTX1	0.707449	0.479287	-0.233981	0.815	0.334793	0.75781	0.12044
NKX3-1	0.825253	0.409228	-0.0551738	0.956	0.544529	0.758376	0.120116
SOX1	0.765678	0.443868	-0.1459	0.884	0.438249	0.759461	0.119495
ZNF473	0.618873	0.536	0.334503	0.738	0.674139	0.762431	0.1178
FERD3L	-0.297611	0.766	0.643345	0.52	0.244471	0.764973	0.116354
TFAP2D	0.602262	0.547	0.345126	0.73	0.669904	0.765883	0.115837
TFAP2E	0.73675	0.461274	-0.164929	0.869	0.404339	0.767292	0.115039
ZIC3	0.67449	0.5	-0.249466	0.803	0.300537	0.767888	0.114702
ZNF174	0.738633	0.46013	0.15858	0.874	0.634425	0.768484	0.114365
ZNF408	0.788023	0.430683	0.0828133	0.934	0.615774	0.768579	0.114311
ZNF560	-0.450985	0.652	0.500107	0.617	0.0347339	0.768603	0.114298
ZNF24	0.531604	0.595	-0.415194	0.678	0.0823147	0.769626	0.11372
KLF5	0.661955	0.508	0.257232	0.797	0.649963	0.770955	0.112971
FOXD2	0.779951	0.43542	0.0878448	0.93	0.613625	0.771013	0.112939
SCYL1	0.540286	0.589	-0.401571	0.688	0.0980863	0.771276	0.11279
ZNF526	0.224973	0.822	0.684855	0.493436	0.643346	0.771612	0.112601
MESP1	0.817128	0.413855	0.0225616	0.982	0.59375	0.772335	0.112194
NKX6-2	0.691232	0.48942	0.213419	0.831	0.639685	0.772607	0.112041
ZNF141	0.262417	0.793	0.652622	0.514	0.64703	0.77341	0.11159
NKX2-3	0.728864	0.466085	-0.154773	0.877	0.405943	0.774445	0.11101
KLF14	0.815653	0.414699	0.0137869	0.989	0.586502	0.775678	0.110319
NR2F6	0.75144	0.452388	-0.116823	0.907	0.448742	0.775837	0.11023
NPAS1	0.584327	0.559	-0.333178	0.739	0.17759	0.778308	0.108848
PAX1	0.623433	0.533	-0.283231	0.777	0.240559	0.779226	0.108336
FEV	0.205732	0.837	0.680419	0.496239	0.626604	0.780292	0.107743
ZNF256	-0.217267	0.828	0.668209	0.504	0.318864	0.78201	0.106788
ZNF75D	0.00501328	0.996	0.807919	0.419137	0.57483	0.78214	0.106716
ZCRB1	0.725374	0.468223	0.133245	0.894	0.607135	0.783126	0.106169
ZNF775	0.658838	0.51	-0.226259	0.821	0.305879	0.783229	0.106111
PURB	0.00125331	0.999	0.806218	0.420117	0.570969	0.784087	0.105636
EDF1	0.452373	0.651	0.460719	0.645	0.645654	0.784259	0.10554
UHRF1	0.0200544	0.984	0.79396	0.427219	0.575595	0.784683	0.105306
GATA1	0.483135	0.629	-0.427521	0.669	0.039325	0.785044	0.105106
TBX5	0.581357	0.561	-0.310738	0.756	0.191357	0.787901	0.103528
ZBTB32	0.485954	0.627	-0.41656	0.677	0.0490685	0.788212	0.103357
ZNF26	-0.190395	0.849	0.67449	0.5	0.342307	0.78823	0.103347
NEUROD6	0.617356	0.537	-0.263714	0.792	0.250062	0.788918	0.102968
ZNF281	0.455152	0.649	0.444059	0.657	0.635838	0.789848	0.102457
ZCCHC3	0.744765	0.456414	0.079041	0.937	0.582519	0.790925	0.101864
TCF7	0.682338	0.495025	0.16747	0.867	0.600905	0.79222	0.101154
FOXF2	0.641805	0.521	0.221119	0.825	0.610179	0.792759	0.100859
IRF6	0.382622	0.702	0.502949	0.615	0.626193	0.794364	0.0999806
ZNF573	-0.233981	0.815	0.628006	0.53	0.278618	0.794548	0.0998796
GABPA	0.373199	0.709	0.502949	0.615	0.619531	0.797958	0.0980198
HOXA9	0.694447	0.487402	0.129452	0.897	0.582584	0.798924	0.0974948
SCML2	-0.271508	0.786	0.587303	0.557	0.223301	0.799421	0.0972242
NR1I3	0.575431	0.565	-0.285841	0.775	0.204771	0.799482	0.0971915
GSC	0.620392	0.535	0.224973	0.822	0.597763	0.801043	0.0963444
PITX3	0.591777	0.554	-0.26112	0.794	0.23381	0.80113	0.0962972
E2F1	0.41656	0.677	0.448212	0.654	0.611487	0.803487	0.0950211
ZC3H11A	-0.325239	0.745	0.531604	0.595	0.145922	0.803908	0.0947937
HOXA10	0.608283	0.543	-0.230118	0.818	0.267403	0.804638	0.0943992
FOXA2	0.694645	0.487278	-0.109255	0.913	0.413933	0.805215	0.0940883
ZNF721	-0.143367	0.886	0.669777	0.503	0.372228	0.80584	0.093751
ZNF804B	0.742222	0.457953	0.0325919	0.974	0.547876	0.806154	0.0935822
PDX1	0.51436	0.607	-0.334503	0.738	0.127178	0.8077	0.0927501
FOXL2	0.750489	0.45296	0.0137869	0.989	0.540424	0.807709	0.0927449
SIX3	-0.154773	0.877	0.655727	0.512	0.354227	0.808548	0.0922942
TLX1	0.505796	0.613	-0.341138	0.733	0.116431	0.808792	0.0921631
SNAPC2	0.591777	0.554	-0.237847	0.812	0.250266	0.809207	0.0919403
SLC30A9	0.534494	0.593	0.306794	0.759	0.59488	0.809398	0.0918379
ZFAND5	0.638728	0.523	-0.175101	0.861	0.327833	0.80957	0.0917454
ZNF673	0.148434	0.882	0.655727	0.512	0.568628	0.810591	0.0911985
SIM2	0.550466	0.582	-0.284536	0.776	0.188041	0.810629	0.091178
ZC3H14	-0.157311	0.875	0.647977	0.517	0.346953	0.811219	0.0908621
HNF4A	0.428895	0.668	-0.415194	0.678	0.00968782	0.811638	0.0906376
RFX5	0.0765268	0.939	0.698238	0.485028	0.547842	0.813641	0.0895674
GRHL3	0.520091	0.603	-0.308108	0.758	0.149895	0.814922	0.0888841
BCL11B	0.720675	0.47111	-0.0351	0.972	0.484774	0.815582	0.0885322
TFCP2L1	0.684472	0.493677	0.0891031	0.929	0.547	0.816134	0.0882383
ZNF570	0.717494	0.473069	-0.0351	0.972	0.482525	0.817066	0.0877428
PREB	0.428895	0.668	0.400213	0.689	0.586267	0.817399	0.087566
NKX2-1	0.474701	0.635	-0.349119	0.727	0.0888	0.818478	0.0869932
FOXH1	0.445443	0.656	-0.37858	0.705	0.0472791	0.819122	0.0866512
UTF1	0.628006	0.53	-0.15858	0.874	0.331935	0.819692	0.0863491
NFYB	0.191671	0.848	0.599259	0.549	0.559272	0.821481	0.0854024
MORC3	0.59776	0.55	-0.190395	0.849	0.288051	0.822548	0.0848388
LBX1	0.692348	0.488719	-0.0501536	0.96	0.4541	0.824233	0.0839499
REL	0.254642	0.799	0.541737	0.588	0.563124	0.824719	0.0836942
NKX2-8	0.665079	0.506	-0.0878448	0.93	0.408166	0.825298	0.0833891
NFX1	0.0853288	0.932	0.666494	0.505095	0.531619	0.825425	0.0833221
TBX6	0.477509	0.633	-0.325239	0.745	0.107671	0.826055	0.0829912
ZCCHC10	0.500107	0.617	-0.298921	0.765	0.142259	0.82637	0.0828254
FIZ1	0.412463	0.68	0.388022	0.698	0.566028	0.828341	0.0817908
ZNF683	0.459326	0.646	-0.334503	0.738	0.0882632	0.829907	0.0809704
ZNF707	0.508647	0.611	0.275412	0.783	0.554413	0.831138	0.080327
GSC2	0.578391	0.563	-0.186567	0.852	0.277061	0.832067	0.0798416
PAX7	0.665079	0.506	-0.0652185	0.948	0.424165	0.832076	0.0798369
E4F1	-0.38532	0.7	0.404289	0.686	0.013413	0.832452	0.0796408
DLX2	0.661955	0.508	-0.0664746	0.947	0.421068	0.833094	0.0793061
ZNF224	0.37858	0.705	0.408373	0.683	0.556459	0.833415	0.0791388
HOXC12	0.655727	0.512	-0.0727564	0.942	0.412222	0.833991	0.0788388
PITX1	0.511501	0.609	0.259823	0.795	0.545409	0.835337	0.0781383
FOXE1	0.669777	0.503	-0.0401168	0.968	0.445237	0.837323	0.0771069
ZNF443	-0.321278	0.748	0.450985	0.652	0.0917173	0.837892	0.0768117
GFI1	0.677421	0.498139	0.0250689	0.98	0.496736	0.838237	0.0766333
GSX2	0.439913	0.66	-0.331853	0.74	0.0764098	0.838397	0.07655
OLIG3	0.533049	0.594	-0.223688	0.823	0.218751	0.838728	0.0763787
ZNF32	0.411099	0.681	0.361133	0.718	0.54605	0.838797	0.0763431
ZNF449	0.271508	0.786	0.490189	0.624	0.538602	0.839872	0.0757868
EPAS1	-0.263714	0.792	0.49585	0.62	0.164145	0.840282	0.0755748
TCF15	0.672917	0.501	0.0225616	0.982	0.491778	0.840951	0.0752292
NR2E1	0.412463	0.68	-0.353118	0.724	0.0419634	0.841191	0.0751054
ZNF776	-0.37858	0.705	0.383971	0.701	0.00381217	0.842523	0.0744182
TP73	0.649524	0.516	-0.0514085	0.959	0.422931	0.842973	0.0741863
MAFA	0.628006	0.53	-0.0777838	0.938	0.389066	0.844583	0.0733577
ZNF347	-0.237847	0.812	0.498687	0.618	0.184442	0.847829	0.0716917
ZNF574	0.382622	0.702	0.365149	0.715	0.528754	0.847908	0.0716514
ARX	0.617356	0.537	-0.0777838	0.938	0.381535	0.849129	0.0710265
GCM1	0.505796	0.613	-0.222403	0.824	0.200389	0.850091	0.0705346
ZIC2	0.624956	0.532	-0.0589399	0.953	0.400234	0.851374	0.0698796
FOXG1	0.493018	0.622	-0.231405	0.817	0.184988	0.852173	0.0694723
MLXIPL	0.588793	0.556	-0.105474	0.916	0.341759	0.852931	0.069086
ZMYM6	0.448212	0.654	-0.280622	0.779	0.118504	0.853046	0.0690276
PRDM13	0.525839	0.599	-0.185292	0.853	0.240803	0.854043	0.0685205
MBD1	0.413828	0.679	-0.310738	0.756	0.0728959	0.855633	0.0677124
ZNF414	0.632592	0.527	-0.031338	0.975	0.425151	0.855967	0.067543
ZNF517	0.510073	0.61	-0.198058	0.843	0.220629	0.856236	0.0674063
ISL2	0.563639	0.573	-0.125661	0.9	0.309697	0.857212	0.0669117
TBX4	0.559237	0.576	0.128188	0.898	0.486083	0.858235	0.0663938
ZNF530	-0.0677307	0.946	0.60076	0.548	0.376908	0.858998	0.0660077
NR1I2	0.553385	0.58	-0.13198	0.895	0.297978	0.859452	0.0657781
CREB3L3	0.417928	0.676	-0.294992	0.768	0.0869287	0.859497	0.0657556
MYNN	0.469097	0.639	0.236558	0.813	0.498973	0.859719	0.0656434
ZNF682	-0.199336	0.842	0.498687	0.618	0.211673	0.860274	0.065363
FOXQ1	0.565108	0.572	0.113039	0.91	0.479522	0.860382	0.0653089
POU6F2	0.568051	0.57	-0.107995	0.914	0.325309	0.860682	0.0651574
ZCCHC9	0.214702	0.83	0.48032	0.631	0.491454	0.862468	0.0642572
GCM2	0.375888	0.707	-0.327883	0.743	0.0339447	0.863481	0.0637471
ZNF14	0.235269	0.814	0.459326	0.646	0.491153	0.863831	0.0635714
DMRTB1	0.446827	0.655	-0.248174	0.804	0.140469	0.864329	0.063321
MIER2	-0.258527	0.796	0.437154	0.662	0.126308	0.864542	0.0632141
ZNF529	0.0664746	0.947	0.587303	0.557	0.462291	0.864879	0.0630447
SIM1	0.527279	0.598	-0.147167	0.883	0.268779	0.865234	0.0628666
ZNF761	0.37858	0.705	0.319958	0.749	0.493941	0.865241	0.0628631
MYB	-0.152237	0.879	0.517224	0.605	0.258085	0.867622	0.0616694
POU4F1	0.457934	0.647	-0.219835	0.826	0.168362	0.869275	0.0608431
ZNF595	0.00375995	0.997	0.617356	0.537	0.439195	0.86988	0.0605409
HMGB2	-0.189118	0.85	0.477509	0.633	0.203923	0.871535	0.059715
GBX2	0.441294	0.659	0.226259	0.821	0.472031	0.87338	0.0587969
ZNF841	0.515792	0.606	0.134509	0.893	0.459832	0.873453	0.0587605
AIRE	0.342466	0.732	-0.331853	0.74	0.00750449	0.873773	0.0586013
VSX1	0.350451	0.726	-0.319958	0.749	0.0215619	0.875053	0.0579657
ZNF862	0.547551	0.584	-0.0853288	0.932	0.326841	0.875366	0.0578105
ZNF696	0.467699	0.64	-0.182743	0.855	0.201494	0.877129	0.0569364
POU3F1	0.420665	0.674	0.235269	0.814	0.463815	0.877993	0.0565088
EHF	0.59776	0.55	0.00125331	0.999	0.423566	0.878481	0.0562675
ONECUT1	0.575431	0.565	0.0338459	0.973	0.430824	0.878658	0.0561802
PRDM14	0.541737	0.588	-0.0765268	0.939	0.328953	0.880081	0.0554774
ZNF160	0.0601954	0.952	0.551925	0.581	0.432834	0.880662	0.0551907
PTF1A	0.464904	0.642	-0.16747	0.867	0.210318	0.882725	0.0541747
MAZ	-0.215984	0.829	0.423405	0.672	0.146668	0.883002	0.0540381
SPDEF	0.412463	0.68	-0.221119	0.825	0.135301	0.885277	0.0529207
NKX2-2	0.359796	0.719	-0.27411	0.784	0.0605888	0.886829	0.05216
NKX2-5	0.442676	0.658	-0.173829	0.862	0.190104	0.888825	0.0511839
GLIS2	0.0677307	0.946	0.521527	0.602	0.416668	0.890122	0.0505505
SPZ1	0.343796	0.731	0.271508	0.786	0.435086	0.892956	0.0491699
HOXA1	0.388022	0.698	0.212137	0.832	0.424376	0.896342	0.0475261
RB1	0.455152	0.649	-0.130716	0.896	0.229411	0.896759	0.0473242
HR	0.485954	0.627	-0.0853288	0.932	0.283285	0.898303	0.0465774
ZNF148	0.473299	0.636	0.0953964	0.924	0.402128	0.900066	0.0457256
IRX6	0.377234	0.706	-0.210856	0.833	0.117647	0.900297	0.0456143
ZNF107	0.182743	0.855	0.400213	0.689	0.412212	0.900825	0.0453595
PTTG1	-0.130716	0.896	0.442676	0.658	0.220589	0.901075	0.045239
OLIG1	0.434397	0.664	-0.140835	0.888	0.20758	0.901109	0.0452227
HDGF	-0.0639626	0.949	0.481727	0.63	0.295404	0.905404	0.0431578
HOXA13	0.51293	0.608	-0.0150403	0.988	0.352061	0.906855	0.0424623
ZNF585B	0.318639	0.75	0.25076	0.802	0.402626	0.90726	0.0422684
FOXN2	-0.100434	0.92	0.448212	0.654	0.245917	0.907351	0.0422246
ZNF502	-0.0891031	0.929	0.453762	0.65	0.257853	0.90845	0.0416991
SLC26A3	0.287147	0.774	-0.275412	0.783	0.00829793	0.909551	0.0411727
GRHL2	0.37858	0.705	-0.16747	0.867	0.149277	0.91213	0.0399433
DLX1	0.473299	0.636	-0.0388625	0.969	0.307193	0.914595	0.0387713
ZBTB45	0.337155	0.736	-0.204452	0.838	0.093835	0.914829	0.0386602
ZNF81	0.488776	0.625	-0.0162938	0.987	0.334096	0.91488	0.0386357
ATAD2	-0.215984	0.829	0.316003	0.752	0.0707241	0.918002	0.0371564
SOX21	0.302855	0.762	-0.228831	0.819	0.052343	0.918318	0.0370068
FOXA3	0.296301	0.767	-0.233981	0.815	0.0440673	0.918802	0.0367783
LHX4	0.361133	0.718	-0.162388	0.871	0.140534	0.91893	0.0367177
ZNF420	0.373199	0.709	-0.137039	0.891	0.166991	0.921874	0.0353283
ZNF569	-0.194225	0.846	0.314686	0.753	0.0851791	0.924295	0.0341894
ZNF668	0.0652185	0.948	0.423405	0.672	0.345509	0.924303	0.0341856
ZNF235	-0.0413712	0.967	0.431644	0.666	0.275965	0.927406	0.0327301
VSX2	0.427521	0.669	0.0463893	0.963	0.335105	0.927505	0.0326837
EGR4	0.184017	0.854	0.312053	0.755	0.350775	0.927735	0.0325762
ZNF507	0.201893	0.84	0.293683	0.769	0.350426	0.928256	0.0323323
LHX8	0.450985	0.652	-0.00626661	0.995	0.314464	0.929465	0.031767
TRIM27	0.317321	0.751	0.170013	0.865	0.344597	0.929843	0.0315904
RBPJL	0.252053	0.801	-0.237847	0.812	0.0100455	0.930186	0.0314301
MORC1	0.254642	0.799	-0.232693	0.816	0.0155201	0.930861	0.0311154
ZNF500	0.254642	0.799	-0.228831	0.819	0.0182505	0.931881	0.0306393
NKX3-2	0.426148	0.67	-0.0250689	0.98	0.283606	0.932819	0.0302028
GZF1	0.105474	0.916	0.362471	0.717	0.330887	0.932891	0.0301691
FBXW7	-0.0539186	0.957	0.40293	0.687	0.246788	0.933179	0.0300348
TBX21	0.296301	0.767	0.177647	0.859	0.335132	0.933763	0.0297635
ZC3H15	0.349119	0.727	0.105474	0.916	0.321446	0.936678	0.0284095
ZFPL1	0.319958	0.749	-0.138304	0.89	0.128449	0.936954	0.0282818
ILF2	0.268909	0.788	0.187843	0.851	0.322972	0.938555	0.0275402
ZNF615	0.386671	0.699	-0.0501536	0.96	0.237954	0.938736	0.0274567
ZNF710	0.389373	0.697	-0.0426256	0.966	0.245188	0.939634	0.0270412
ETV3L	0.228831	0.819	-0.223688	0.823	0.00363682	0.939925	0.026907
ZNF492	-0.207013	0.836	0.241716	0.809	0.0245392	0.940823	0.0264921
ZNF93	-0.170013	0.865	0.275412	0.783	0.0745282	0.941202	0.0263172
ZNF491	-0.204452	0.838	0.241716	0.809	0.0263496	0.941454	0.026201
ZNF302	0.38532	0.7	-0.0388625	0.969	0.244983	0.941593	0.0261369
ZFP82	-0.138304	0.89	0.297611	0.766	0.112647	0.942919	0.0255255
RCHY1	-0.16747	0.867	0.263714	0.792	0.0680548	0.944788	0.0246656
MYBL2	-0.100434	0.92	0.304168	0.761	0.144062	0.949715	0.0224066
ZNF580	0.19678	0.844	0.213419	0.831	0.290054	0.950158	0.0222043
ZNF234	0.12061	0.904	0.280622	0.779	0.283714	0.951164	0.0217448
TFAM	-0.0288302	0.977	0.353118	0.724	0.229306	0.952255	0.0212468
ZNF771	-0.0150403	0.988	0.36381	0.716	0.246617	0.952276	0.0212373
ZNF324B	0.248174	0.804	0.148434	0.882	0.280444	0.952869	0.0209668
LASS2	0.276714	0.782	-0.106734	0.915	0.120194	0.955041	0.0199782
RBL2	0.362471	0.717	0.00125331	0.999	0.257192	0.955292	0.0198637
HOXD11	0.0903614	0.928	0.287147	0.774	0.266939	0.955953	0.0195634
ZFR	0.235269	0.814	-0.143367	0.886	0.0649842	0.956917	0.0191255
LBX2	0.337155	0.736	0.0250689	0.98	0.256131	0.956942	0.0191143
ZNF579	0.16747	0.867	0.209574	0.834	0.266611	0.957527	0.0188487
RFX6	0.272809	0.785	-0.0953964	0.924	0.12545	0.958257	0.0185178
ZSWIM2	0.134509	0.893	0.236558	0.813	0.262384	0.958472	0.0184206
ZFYVE26	0.190395	0.849	-0.178921	0.858	0.00811324	0.959247	0.0180696
MSX1	0.121872	0.903	0.228831	0.819	0.247985	0.962684	0.0165161
ZBTB2	0.231405	0.817	-0.118085	0.906	0.0801292	0.962879	0.0164285
ZNF426	0	1	0.326561	0.744	0.230913	0.964011	0.0159178
IRX2	0.317321	0.751	-0.0112801	0.991	0.216404	0.964083	0.0158857
E2F8	0.0702433	0.944	0.267609	0.789	0.238898	0.964252	0.0158093
RORC	0.184017	0.854	-0.157311	0.875	0.0188843	0.964965	0.0154883
ZNF468	0.252053	0.801	-0.084071	0.933	0.118781	0.96499	0.0154774
ZNF358	0.278016	0.781	-0.0401168	0.968	0.16822	0.967466	0.0143643
ZNF134	-0.113039	0.91	0.210856	0.833	0.0691671	0.968029	0.0141117
PROP1	0.175101	0.861	-0.149702	0.881	0.0179603	0.96817	0.0140483
ARID3A	0.170013	0.865	0.153505	0.878	0.228762	0.968426	0.0139334
ZNF354B	-0.138304	0.89	0.163658	0.87	0.0179282	0.972363	0.0121717
ZFP42	0.0325919	0.974	0.258527	0.796	0.205852	0.972619	0.0120573
HOXB9	0.254642	0.799	-0.0325919	0.974	0.157013	0.973357	0.0117278
CREBL2	0.152237	0.879	-0.13957	0.889	0.00895716	0.974154	0.0113723
ZDHHC4	-0.13957	0.889	0.144634	0.885	0.00358088	0.975451	0.0107943
THAP7	0.157311	0.875	-0.121872	0.903	0.0250586	0.97625	0.0104389
HNF4G	0.156042	0.876	0.111777	0.911	0.189377	0.978074	0.00962821
POU3F3	0.133245	0.894	0.133245	0.894	0.188436	0.978344	0.00950842
TBR1	0.235269	0.814	0.0225616	0.982	0.182314	0.978369	0.00949728
ZNF653	0.209574	0.834	-0.0388625	0.969	0.120711	0.980291	0.00864488
NEUROG2	0.204452	0.838	-0.0413712	0.967	0.115316	0.980757	0.00843864
GSX1	0.0777838	0.938	0.157311	0.875	0.166237	0.982878	0.00750027
GATA4	0.130716	0.896	0.0941374	0.925	0.158995	0.984429	0.00681556
POU1F1	0.115562	0.908	-0.109255	0.913	0.00445923	0.984467	0.00679867
TBX2	-0.00877331	0.993	0.189118	0.85	0.127523	0.987153	0.00561543
APP	0.109255	0.913	-0.061451	0.951	0.0338027	0.990914	0.00396388
ZNF230	0.13198	0.895	0.00250663	0.998	0.0950965	0.994083	0.00257718
CDX1	0.107995	0.914	-0.0275764	0.978	0.0568642	0.99416	0.00254365
ZSCAN22	0.0740131	0.941	0.0388625	0.969	0.0798151	0.995993	0.00174355
TBL1XR1	0.0891031	0.929	-0.0100267	0.992	0.0559154	0.99684	0.00137433
ZNF672	0.0112801	0.991	0.0601954	0.952	0.0505408	0.998369	0.000708922
ZNF444	0	1	0.0526635	0.958	0.0372387	0.999105	0.0003887
TAF9	0.00375995	0.997	-0.0351	0.972	-0.0221608	0.999517	-0.000209772
ZNF383	0.0150403	0.988	-0.0426256	0.966	-0.0195057	0.998945	-0.000458631
DMRT2	-0.0376083	0.97	-0.0325919	0.974	-0.0496391	0.998447	-0.000675196
SIX6	-0.00626661	0.995	-0.105474	0.916	-0.0790123	0.995956	-0.00176005
ZNF792	0.061451	0.951	-0.068987	0.945	-0.00532869	0.994686	-0.00231398
CTCF	-0.121872	0.903	0.0162938	0.987	-0.0746554	0.993861	-0.00267428
HLTF	-0.13198	0.895	0.0175473	0.986	-0.0809162	0.992806	-0.00313576
BLZF1	-0.0200544	0.984	-0.138304	0.89	-0.111976	0.991941	-0.00351411
ZCCHC6	-0.135774	0.892	0.0338459	0.973	-0.072074	0.990865	-0.00398539
NR1H4	0.0438801	0.965	-0.128188	0.898	-0.0596149	0.990674	-0.00406943
ZBTB26	-0.106734	0.915	0.0714998	0.943	-0.0249144	0.990132	-0.00430687
ZNF75A	-0.0991741	0.921	-0.101693	0.919	-0.142035	0.987548	-0.00544169
TCF12	-0.0878448	0.93	-0.118085	0.906	-0.145615	0.986903	-0.00572565
MXD4	0.0853288	0.932	-0.12061	0.904	-0.0249475	0.986894	-0.00572957
BTAF1	-0.204452	0.838	-0.00125331	0.999	-0.145456	0.985957	-0.00614192
ZNF701	0.0853288	0.932	-0.134509	0.893	-0.0347757	0.985075	-0.00653092
ZBED2	0.0438801	0.965	-0.173829	0.862	-0.0918876	0.984993	-0.00656707
ZDHHC19	0.0639626	0.949	-0.156042	0.876	-0.0651099	0.984899	-0.00660822
ZNF565	-0.185292	0.853	0.0413712	0.967	-0.101767	0.983678	-0.00714698
CLOCK	-0.161119	0.872	-0.0777838	0.938	-0.16893	0.982318	-0.00774809
SALL1	0.061451	0.951	-0.189118	0.85	-0.0902745	0.980335	-0.00862564
NEUROD2	0.0802983	0.936	-0.177647	0.859	-0.0688361	0.979403	-0.00903872
ZNF646	-0.0702433	0.944	-0.191671	0.848	-0.185201	0.978629	-0.00938195
CBX2	-0.237847	0.812	0.0351	0.972	-0.143364	0.976047	-0.0105294
ZNF189	-0.268909	0.788	0	1	-0.190147	0.975747	-0.0106629
MECP2	-0.209574	0.834	-0.0714998	0.943	-0.198749	0.975379	-0.0108267
TCF19	-0.278016	0.781	0	1	-0.196587	0.974048	-0.0114198
ZNF79	0.119348	0.905	-0.173829	0.862	-0.0385241	0.973827	-0.0115181
ZNF566	-0.208293	0.835	0.0853288	0.932	-0.086949	0.973356	-0.0117285
LHX3	0.106734	0.915	-0.191671	0.848	-0.0600595	0.972775	-0.0119874
IRX4	0.0891031	0.929	-0.214702	0.83	-0.0888116	0.97153	-0.0125439
ZNF479	0.101693	0.919	-0.203173	0.839	-0.0717567	0.971522	-0.0125473
MYF5	-0.00626661	0.995	-0.28976	0.772	-0.209322	0.970762	-0.012887
ZNF280A	0.00375995	0.997	-0.292375	0.77	-0.204082	0.970644	-0.0129402
ZNF131	-0.258527	0.796	0.0501536	0.96	-0.147342	0.969702	-0.0133616
NHLH1	0.079041	0.937	-0.248174	0.804	-0.119595	0.966717	-0.0147005
ZNF614	-0.24559	0.806	-0.0865867	0.931	-0.234884	0.965873	-0.0150802
ARID4A	-0.118085	0.906	-0.217267	0.828	-0.23713	0.96581	-0.0151084
PHF20	-0.325239	0.745	0.00375995	0.997	-0.22732	0.963645	-0.0160829
CXXC1	0.0677307	0.946	-0.280622	0.779	-0.150537	0.961888	-0.0168754
ZNF587	-0.148434	0.882	-0.212137	0.832	-0.254963	0.960932	-0.0173072
ZNF431	-0.285841	0.775	-0.0740131	0.941	-0.254455	0.95951	-0.0179504
ZNHIT1	-0.00125331	0.999	-0.345126	0.73	-0.244927	0.959509	-0.0179511
PAX3	0.161119	0.872	-0.207013	0.836	-0.032452	0.959421	-0.0179908
ZNF100	-0.244298	0.807	0.121872	0.903	-0.0865679	0.959335	-0.0180296
CDX2	0.123135	0.902	-0.249466	0.803	-0.0893296	0.957925	-0.0186687
KLF17	0.0966555	0.923	-0.275412	0.783	-0.1264	0.957408	-0.0189031
CTBP2	0.186567	0.852	-0.194225	0.846	-0.00541463	0.956783	-0.0191867
ZNF253	-0.212137	0.832	-0.168741	0.866	-0.269322	0.956691	-0.0192283
VAX1	0.0941374	0.925	-0.281926	0.778	-0.132787	0.956408	-0.0193569
ZDHHC13	0.159849	0.873	-0.222403	0.824	-0.0442325	0.95631	-0.0194014
DMRTA1	0.186567	0.852	-0.200615	0.841	-0.00993297	0.955375	-0.019826
MAFG	-0.258527	0.796	-0.129452	0.897	-0.274343	0.954531	-0.02021
SOX12	-0.331853	0.74	-0.047644	0.962	-0.268345	0.95381	-0.0205383
ZNF175	-0.358459	0.72	-0.0175473	0.986	-0.265876	0.953141	-0.020843
ZSCAN29	-0.262417	0.793	-0.134509	0.893	-0.280669	0.952532	-0.0211205
BUD31	-0.219835	0.826	0.185292	0.853	-0.0244253	0.95129	-0.0216869
ZFAND6	-0.213419	0.831	0.194225	0.846	-0.0135726	0.950745	-0.0219358
HES7	0.154773	0.877	-0.252053	0.801	-0.0687872	0.950552	-0.0220243
C11orf9	-0.259823	0.795	-0.154773	0.877	-0.293164	0.948674	-0.0228832
ZSCAN10	-0.021308	0.983	-0.383971	0.701	-0.286575	0.945693	-0.0242498
ZNF43	-0.379926	0.704	0.0338459	0.973	-0.244716	0.944157	-0.0249556
OLIG2	0.217267	0.828	-0.219835	0.826	-0.00181529	0.943754	-0.0251412
EN2	0.19678	0.844	-0.241716	0.809	-0.031775	0.943323	-0.0253395
ZNF720	-0.401571	0.688	0.0275764	0.978	-0.264454	0.939461	-0.0271213
YEATS4	-0.305481	0.76	-0.1459	0.884	-0.319175	0.939054	-0.0273093
ZNF417	-0.397498	0.691	0.0376083	0.97	-0.254481	0.938428	-0.027599
ZNF85	-0.382622	0.702	0.0576844	0.954	-0.229766	0.938203	-0.0277032
MXD3	-0.346456	0.729	-0.106734	0.915	-0.320454	0.937126	-0.028202
ZNF782	-0.263714	0.792	-0.209574	0.834	-0.334666	0.934459	-0.0294396
PAX9	0.187843	0.851	-0.284536	0.776	-0.0683722	0.934396	-0.0294689
CNOT7	-0.335829	0.737	-0.130716	0.896	-0.329897	0.934386	-0.0294735
ZNF367	-0.244298	0.807	0.243007	0.808	-0.000912927	0.930891	-0.031101
ZBTB6	0.0451346	0.964	-0.424776	0.671	-0.268447	0.928642	-0.0321518
ZNF541	0.00125331	0.999	-0.460719	0.645	-0.324892	0.927553	-0.0326615
NR2E3	0.0112801	0.991	-0.453762	0.65	-0.312882	0.927462	-0.0327037
ZBTB43	-0.237847	0.812	-0.270208	0.787	-0.359249	0.925196	-0.0337661
ZNF675	-0.214702	0.83	-0.308108	0.758	-0.369682	0.920684	-0.0358892
ZNF324	-0.420665	0.674	-0.09162	0.927	-0.36224	0.918657	-0.0368465
ZNF23	-0.228831	0.819	-0.305481	0.76	-0.377816	0.917544	-0.0373732
TOP2A	-0.388022	0.698	0.143367	0.886	-0.172997	0.915629	-0.0382806
E2F7	-0.396142	0.692	0.137039	0.891	-0.183214	0.914734	-0.0387052
ZNF236	-0.446827	0.655	-0.0752699	0.94	-0.369178	0.914312	-0.0389057
FOXJ1	-0.00626661	0.995	-0.498687	0.618	-0.357056	0.913928	-0.039088
RBL1	-0.478914	0.632	-0.0376083	0.97	-0.365236	0.913016	-0.0395217
POU3F4	0.123135	0.902	-0.415194	0.678	-0.206517	0.912288	-0.0398681
FOXK2	0.0351	0.972	-0.504372	0.614	-0.331825	0.904856	-0.0434204
CITED2	-0.439913	0.66	-0.124398	0.901	-0.399028	0.903744	-0.0439547
ZNF48	-0.0714998	0.943	-0.481727	0.63	-0.39119	0.903447	-0.0440972
SMAD5	-0.460719	0.645	-0.105474	0.916	-0.400359	0.901735	-0.0449209
ELF5	0.267609	0.789	-0.323918	0.746	-0.0398163	0.90056	-0.0454874
ZNF770	-0.150969	0.88	-0.428895	0.668	-0.410026	0.90016	-0.0456804
ZNF304	-0.428895	0.668	0.15858	0.874	-0.191141	0.898017	-0.0467157
E2F2	-0.493018	0.622	-0.0865867	0.931	-0.409842	0.895441	-0.047963
STAT3	-0.0413712	0.967	-0.531604	0.595	-0.405155	0.893398	-0.0489548
ZSCAN18	0.0413712	0.967	-0.533049	0.594	-0.347668	0.892863	-0.0492151
GFI1B	0.222403	0.824	-0.390726	0.696	-0.119022	0.892367	-0.0494566
GPBP1	-0.396142	0.692	-0.219835	0.826	-0.435561	0.8913	-0.0499759
VPS72	-0.339809	0.734	-0.296301	0.767	-0.449798	0.886417	-0.0523618
ZFP64	-0.0991741	0.921	-0.508647	0.611	-0.429794	0.886275	-0.0524314
MYOG	0.0300841	0.976	-0.559237	0.576	-0.374168	0.885956	-0.0525879
TFDP2	-0.392079	0.695	0.244298	0.807	-0.104497	0.885199	-0.052959
ZNF611	0.09162	0.927	-0.517224	0.605	-0.300947	0.885182	-0.0529675
CIZ1	-0.301544	0.763	-0.338482	0.735	-0.452566	0.885165	-0.052976
TFDP3	0.1459	0.884	-0.476104	0.634	-0.233489	0.884963	-0.0530751
ZNF519	-0.420665	0.674	0.213419	0.831	-0.146545	0.884753	-0.053178
AEBP2	-0.26112	0.794	-0.37858	0.705	-0.452336	0.884565	-0.0532703
ZDHHC6	0.253347	0.8	-0.389373	0.697	-0.0961851	0.883302	-0.053891
SLC2A4RG	-0.0225616	0.982	-0.572475	0.567	-0.420755	0.88283	-0.0541228
NR5A1	0.194225	0.846	-0.442676	0.658	-0.175682	0.882756	-0.0541591
C2orf3	-0.41656	0.677	0.227545	0.82	-0.133654	0.881859	-0.0546007
ZNF830	-0.252053	0.801	-0.40565	0.685	-0.465066	0.878023	-0.0564943
SARNP	-0.334503	0.738	-0.329206	0.742	-0.469313	0.877368	-0.0568183
OVOL1	0.159849	0.873	-0.488776	0.625	-0.232587	0.876177	-0.057408
ZNF680	-0.413828	0.679	-0.25076	0.802	-0.469934	0.87553	-0.057729
GON4L	-0.420665	0.674	0.25076	0.802	-0.120141	0.873078	-0.058947
GABPB1	0.15858	0.874	-0.498687	0.618	-0.240492	0.872822	-0.0590744
ELF3	0.262417	0.793	-0.412463	0.68	-0.106099	0.872272	-0.0593482
FOXM1	-0.423405	0.672	0.275412	0.783	-0.104647	0.864044	-0.0634642
ZNF334	-0.568051	0.57	-0.101693	0.919	-0.473581	0.862532	-0.0642247
ZFYVE16	-0.369171	0.712	-0.339809	0.734	-0.501325	0.861741	-0.0646234
KDM5A	-0.640266	0.522	-0.00125331	0.999	-0.453622	0.861006	-0.0649937
CIR1	-0.522963	0.601	-0.171285	0.864	-0.490907	0.85956	-0.0657238
BARHL2	0.294992	0.768	-0.419296	0.675	-0.087896	0.858993	-0.0660104
RC3H2	-0.346456	0.729	-0.373199	0.709	-0.508873	0.85798	-0.066523
FOXN1	0.343796	0.731	-0.375888	0.707	-0.0226929	0.857951	-0.0665377
GTF2H3	-0.483135	0.629	0.236558	0.813	-0.174356	0.854331	-0.0683738
ELF2	-0.287147	0.774	-0.445443	0.656	-0.518019	0.851882	-0.0696207
ZNF620	-0.623433	0.533	0.0639626	0.949	-0.395605	0.850572	-0.070289
NFE2L1	0.297611	0.766	-0.439913	0.66	-0.100623	0.850397	-0.0703784
KLF1	0.36381	0.716	-0.379926	0.704	-0.0113962	0.849374	-0.070901
ERV3	-0.56217	0.574	-0.154773	0.877	-0.506956	0.848917	-0.0711346
FOXN4	-0.221119	0.825	-0.510073	0.61	-0.517031	0.848816	-0.0711866
PHF5A	-0.466301	0.641	0.272809	0.785	-0.13682	0.848771	-0.0712094
ZNF416	-0.62648	0.531	0.079041	0.937	-0.387098	0.844867	-0.0732115
USF1	-0.563639	0.573	0.16747	0.867	-0.280133	0.844339	-0.0734832
ZNF214	0.19678	0.844	-0.543189	0.587	-0.244948	0.843384	-0.0739749
HMGA2	0.236558	0.813	-0.51293	0.608	-0.195425	0.842593	-0.0743822
LMX1A	0.284536	0.776	-0.481727	0.63	-0.139435	0.838741	-0.076372
TAF1B	-0.573952	0.566	0.194225	0.846	-0.268508	0.831449	-0.0801641
ZFC3H1	-0.43302	0.665	-0.361133	0.718	-0.561551	0.830442	-0.0806909
ZNF428	0.0639626	0.949	-0.671346	0.502	-0.429485	0.829648	-0.0811062
HSF4	-0.575431	0.565	0.205732	0.837	-0.261416	0.827045	-0.0824709
THOC1	-0.714654	0.474823	-0.0125335	0.99	-0.514199	0.824917	-0.0835897
ZNF572	-0.244298	0.807	-0.554846	0.579	-0.56508	0.822779	-0.0847171
ZNF394	-0.36783	0.713	-0.449598	0.653	-0.578009	0.821509	-0.0853874
ZRSR2	-0.617356	0.537	-0.168741	0.866	-0.555855	0.821091	-0.0856087
CREB3	0.392079	0.695	-0.427521	0.669	-0.0250613	0.821024	-0.085644
BCL11A	-0.544642	0.586	0.263714	0.792	-0.198646	0.820378	-0.085986
PRDM4	-0.490189	0.624	-0.331853	0.74	-0.581272	0.818567	-0.086946
NKX6-3	0.173829	0.862	-0.620392	0.535	-0.315768	0.81811	-0.0871881
DMBX1	0.411099	0.681	-0.41656	0.677	-0.00386183	0.818007	-0.0872428
ZNF180	-0.381274	0.703	-0.470497	0.638	-0.602293	0.808139	-0.0925137
ZNF223	0.278016	0.781	-0.566579	0.571	-0.204045	0.806077	-0.0936235
ZNF493	-0.49585	0.62	-0.361133	0.718	-0.605979	0.805438	-0.0939681
IKZF2	0.1143	0.909	-0.695126	0.486977	-0.410706	0.803409	-0.0950635
HNF1B	0.400213	0.689	-0.467699	0.64	-0.04772	0.802019	-0.0958156
ZNF577	-0.679329	0.49693	0.144634	0.885	-0.378087	0.801053	-0.0963388
C5orf41	0.222403	0.824	-0.632592	0.527	-0.290047	0.796471	-0.0988298
TAF5	-0.614326	0.539	-0.248174	0.804	-0.609879	0.795726	-0.0992362
DMRT1	0.398855	0.69	-0.490189	0.624	-0.064583	0.793379	-0.100519
ZNF664	0.138304	0.89	-0.700519	0.483603	-0.397546	0.79325	-0.10059
MYF6	0.358459	0.72	-0.52872	0.597	-0.120393	0.792772	-0.100852
ZGPAT	-0.351784	0.725	-0.541737	0.588	-0.631815	0.789768	-0.1025
RAX2	0.319958	0.749	-0.570999	0.568	-0.177513	0.789028	-0.102908
ZFYVE19	-0.154773	0.877	-0.699984	0.483938	-0.604404	0.788156	-0.103388
TFIP11	-0.153505	0.878	-0.713674	0.475429	-0.613188	0.78211	-0.106732
SP3	-0.585815	0.558	-0.339809	0.734	-0.654515	0.775173	-0.110601
ZFP1	-0.0112801	0.991	-0.822138	0.410998	-0.589316	0.773138	-0.111743
ZNF670	-0.777821	0.436675	-0.0878448	0.93	-0.612118	0.772066	-0.112345
ZNF264	-0.441294	0.659	-0.505796	0.613	-0.669694	0.770132	-0.113435
TRIM29	-0.474701	0.635	0.473299	0.636	-0.000991591	0.770035	-0.11349
SNAPC4	-0.544642	0.586	0.411099	0.681	-0.094429	0.765659	-0.115964
ZBTB41	-0.213419	0.831	-0.707004	0.479564	-0.650838	0.765155	-0.11625
ZNF177	-0.786105	0.431806	-0.100434	0.92	-0.626877	0.763998	-0.116908
ZNF558	-0.460719	0.645	-0.508647	0.611	-0.685445	0.761062	-0.11858
PBX2	-0.540286	0.589	-0.430269	0.667	-0.686286	0.759913	-0.119236
RBCK1	-0.81548	0.414798	-0.0752699	0.94	-0.629855	0.757142	-0.120822
ZNF135	-0.786922	0.431328	-0.126925	0.899	-0.646187	0.755115	-0.121987
CRX	0.371856	0.71	-0.609791	0.542	-0.168246	0.752315	-0.1236
ZNF12	-0.497268	0.619	-0.498687	0.618	-0.704247	0.750133	-0.124862
PLAGL2	-0.729571	0.465652	0.240426	0.81	-0.345878	0.744941	-0.127878
PHTF2	-0.774295	0.438756	-0.177647	0.859	-0.673125	0.744661	-0.128041
TBX10	0.134509	0.893	-0.806072	0.420201	-0.474867	0.743046	-0.128984
ZNF195	-0.67776	0.497924	0.319958	0.749	-0.253004	0.74079	-0.130305
PAX6	0.382622	0.702	-0.635657	0.525	-0.178923	0.736429	-0.132869
DLX3	0.491603	0.623	-0.541737	0.588	-0.0354498	0.7342	-0.134186
ZC3HC1	-0.791005	0.428941	-0.184017	0.854	-0.689445	0.734192	-0.134191
ZNF488	0.276714	0.782	-0.725809	0.467956	-0.317559	0.733816	-0.134413
ZNF277	-0.366489	0.714	-0.657281	0.511	-0.723915	0.732721	-0.135061
TBPL2	0.424776	0.671	-0.614326	0.539	-0.134032	0.729496	-0.136977
ZNF140	-0.719537	0.47181	-0.298921	0.765	-0.720159	0.728748	-0.137423
ZNF205	0.381274	0.703	-0.654174	0.513	-0.192969	0.728447	-0.137602
ZMAT2	-0.742114	0.458018	0.281926	0.778	-0.325402	0.724034	-0.140241
ZNF655	-0.253347	0.8	-0.768019	0.442476	-0.722215	0.721594	-0.141707
ZNF446	0.408373	0.683	-0.649524	0.516	-0.170519	0.719978	-0.142681
ESRRB	0.329206	0.742	-0.722458	0.470013	-0.278071	0.716123	-0.145012
ZNF764	-0.109255	0.913	-0.874592	0.381796	-0.695685	0.715944	-0.145121
ZSCAN1	0.412463	0.68	-0.660396	0.509	-0.175315	0.713343	-0.146702
ZNF687	-0.797626	0.425087	-0.237847	0.812	-0.73219	0.712335	-0.147316
ZNF585A	-0.824759	0.409508	0.201893	0.84	-0.440433	0.711073	-0.148086
WHSC1	-0.877114	0.380425	0.124398	0.901	-0.53225	0.709765	-0.148886
ZNF677	-0.739561	0.459566	-0.327883	0.743	-0.754797	0.708365	-0.149743
MLL4	-0.761698	0.44624	0.302855	0.762	-0.324451	0.706833	-0.150683
ZC3H3	-0.898709	0.368807	-0.101693	0.919	-0.707392	0.705644	-0.151415
MIER3	-0.543189	0.587	-0.582842	0.56	-0.796223	0.694437	-0.158367
ZNF660	-0.681381	0.49563	0.437154	0.662	-0.172695	0.693755	-0.158794
E2F6	-0.911095	0.362245	-0.121872	0.903	-0.730419	0.692639	-0.159493
ZNF451	-0.775877	0.437822	-0.325239	0.745	-0.778607	0.691598	-0.160146
DUXA	0.200615	0.841	-0.870688	0.383925	-0.473813	0.687888	-0.162482
INSM1	-0.565108	0.572	-0.590284	0.555	-0.816986	0.681715	-0.166397
ZNF513	-0.255936	0.798	-0.84638	0.397341	-0.779455	0.681276	-0.166677
ZNF627	-0.419296	0.675	-0.722914	0.469733	-0.807664	0.681267	-0.166683
ZHX1	-0.666643	0.505	-0.485954	0.627	-0.815009	0.680767	-0.167001
FOXR1	0.493018	0.622	-0.663516	0.507	-0.120561	0.679291	-0.167944
RFX4	0.527279	0.598	-0.632592	0.527	-0.0744678	0.679051	-0.168098
ZFP161	-0.553385	0.58	-0.608283	0.543	-0.821423	0.678813	-0.16825
ZUFSP	-0.679513	0.496813	-0.477509	0.633	-0.818138	0.678284	-0.168588
ZNF341	0.397498	0.691	-0.749086	0.453805	-0.24861	0.677238	-0.169259
ZNF138	-0.797094	0.425397	-0.335829	0.737	-0.801097	0.677166	-0.169305
HCFC1	-0.923372	0.355813	0.162388	0.871	-0.538097	0.672965	-0.172007
LASS3	-0.296301	0.767	-0.840558	0.400596	-0.803881	0.669842	-0.174028
ZNF326	-1.00586	0.314481	-0.0664746	0.947	-0.758258	0.658552	-0.18141
ZNF514	-0.96759	0.333249	-0.137039	0.891	-0.781091	0.657474	-0.182122
TOP2B	-1.04088	0.297934	0.00751996	0.994	-0.730692	0.656527	-0.182748
RNF141	0.278016	0.781	-0.882306	0.377611	-0.427298	0.655025	-0.183742
MTA3	-0.863465	0.387882	0.308108	0.758	-0.392697	0.653925	-0.184472
ZMYM3	-0.834361	0.404077	0.349119	0.727	-0.343118	0.653619	-0.184675
MIER1	0.209574	0.834	-0.935848	0.349352	-0.513553	0.650663	-0.186644
HIVEP1	-0.487365	0.626	-0.736007	0.461726	-0.865054	0.647794	-0.188563
ZXDC	-1.01103	0.312001	-0.0941374	0.925	-0.781473	0.647248	-0.188929
ZFAND2A	-0.191671	0.848	-0.954812	0.339673	-0.810686	0.646554	-0.189395
BCLAF1	-0.984808	0.324719	-0.191671	0.848	-0.831896	0.630487	-0.200324
ZNF273	-0.666643	0.505	-0.614326	0.539	-0.905782	0.626385	-0.203159
ZNF329	-0.338482	0.735	-0.89623	0.37013	-0.873073	0.62619	-0.203294
ZC3H7A	-1.0318	0.302167	-0.138304	0.89	-0.827387	0.622115	-0.206129
NFAT5	0.0765268	0.939	-1.07087	0.284229	-0.703105	0.619432	-0.208007
NKRF	-0.824708	0.409538	0.453762	0.65	-0.262298	0.618517	-0.208648
SMARCA4	-1.10124	0.27079	0.0250689	0.98	-0.760971	0.617424	-0.209416
ZFP112	-0.836622	0.402805	0.445443	0.656	-0.276605	0.615917	-0.210478
HES4	0.275412	0.783	-0.962354	0.335872	-0.485742	0.614247	-0.211657
ZNF335	-0.813516	0.415922	-0.478914	0.632	-0.913886	0.61408	-0.211775
TAF12	0.651072	0.515	-0.661955	0.508	-0.0076955	0.612416	-0.212953
GTF2H4	-0.908337	0.3637	-0.359796	0.719	-0.896705	0.612256	-0.213067
KLF13	0.28976	0.772	-0.971958	0.331072	-0.482387	0.604257	-0.218778
MTA1	-0.945756	0.344273	0.342466	0.732	-0.42659	0.599349	-0.22232
ZNF652	-0.569525	0.569	-0.771836	0.440212	-0.948485	0.597239	-0.223852
ZNF709	-0.629533	0.529	-0.71814	0.472671	-0.952949	0.596633	-0.224293
ZNF607	-0.966975	0.333557	0.325239	0.745	-0.453776	0.594489	-0.225856
ZNF91	-0.119348	0.905	-1.09357	0.274142	-0.857666	0.59393	-0.226265
ADNP	-1.00378	0.315483	-0.28976	0.772	-0.914673	0.587553	-0.230953
DENND4A	-0.464904	0.642	-0.880006	0.378856	-0.950995	0.58709	-0.231295
ZNF233	-0.917673	0.35879	-0.419296	0.675	-0.94538	0.585614	-0.232389
ZSCAN21	-0.882831	0.377328	-0.466301	0.641	-0.95398	0.585165	-0.232721
ZBTB49	-0.858096	0.39084	0.510073	0.61	-0.246089	0.580237	-0.236395
ZNF280B	-0.621912	0.534	-0.761725	0.446224	-0.978379	0.580052	-0.236533
ZNF528	-1.07815	0.280966	0.194225	0.846	-0.62503	0.579211	-0.237163
ZNF323	-0.0740131	0.941	-1.151	0.249731	-0.866218	0.575315	-0.240095
ZNF777	-0.930258	0.352237	-0.437154	0.662	-0.966906	0.572679	-0.242089
ZNF510	-0.457934	0.647	-0.918291	0.358466	-0.973138	0.570851	-0.243478
ZSWIM1	0.133245	0.894	-1.12833	0.25918	-0.703633	0.570527	-0.243724
HBP1	0.222403	0.824	-1.08199	0.279258	-0.607818	0.568185	-0.24551
ZNF568	-0.737045	0.461095	-0.676365	0.498809	-0.999432	0.568023	-0.245634
ASH1L	-1.20073	0.229855	-0.00501328	0.996	-0.852591	0.566459	-0.246832
PHF21A	-1.16054	0.245827	-0.0865867	0.931	-0.881854	0.566355	-0.246911
SP1	-1.14124	0.253768	0.126925	0.899	-0.717232	0.565281	-0.247736
ZNF610	-1.04343	0.29675	0.296301	0.767	-0.528298	0.564497	-0.248338
ZNF192	-0.906206	0.364827	-0.510073	0.61	-1.00146	0.556946	-0.254187
ZDHHC2	0.605269	0.545	-0.841318	0.40017	-0.166912	0.550212	-0.25947
ZNF692	-1.0924	0.274659	-0.265012	0.791	-0.959833	0.548935	-0.260479
ZEB2	-0.862199	0.388578	0.587303	0.557	-0.194381	0.547686	-0.261469
ZC4H2	-0.838214	0.401911	0.618873	0.536	-0.155097	0.546132	-0.262703
ZFAND1	-1.14121	0.253784	-0.194225	0.846	-0.944292	0.545021	-0.263587
ILF3	-0.907292	0.364252	0.541737	0.588	-0.258487	0.544219	-0.264227
THAP1	0.444059	0.657	-0.987061	0.323613	-0.38396	0.541799	-0.266162
ZFP30	-0.887419	0.374853	-0.575431	0.565	-1.03439	0.540525	-0.267184
RBAK	-0.959292	0.337411	-0.494434	0.621	-1.02794	0.537006	-0.270021
ZNF354C	-0.782989	0.433634	-0.70819	0.478827	-1.05442	0.534033	-0.272432
MYST2	-0.190395	0.849	-1.16689	0.243256	-0.959744	0.532282	-0.273858
HELZ	-0.793648	0.427401	-0.708175	0.478836	-1.06195	0.529326	-0.276277
ZNF2	-1.25474	0.209574	-0.0300841	0.976	-0.908507	0.52915	-0.276422
ZNF746	0.515792	0.606	-0.963311	0.335391	-0.316444	0.527087	-0.278117
ZFP41	-0.842143	0.399708	-0.666643	0.505	-1.06687	0.52486	-0.279956
ZNF501	-1.00616	0.314339	-0.464904	0.642	-1.0402	0.524785	-0.280018
ZNF669	-1.258	0.208392	-0.0438801	0.965	-0.920567	0.523653	-0.280957
ZC3H10	-0.541737	0.588	-0.961676	0.336213	-1.06307	0.518161	-0.285535
ZNF622	-0.768826	0.441997	0.760811	0.44677	-0.00566729	0.517801	-0.285837
SIN3A	-0.940444	0.34699	-0.569525	0.569	-1.06771	0.517746	-0.285883
PEG3	-0.0225616	0.982	-1.28483	0.198853	-0.924463	0.514225	-0.288847
EWSR1	-1.1467	0.251507	-0.287147	0.774	-1.01388	0.513231	-0.289687
ZBTB5	-0.620392	0.535	-0.910246	0.362693	-1.08232	0.512207	-0.290555
HLF	-1.13692	0.255571	-0.316003	0.752	-1.02737	0.509163	-0.293143
ZFY	-0.494434	0.621	-1.0262	0.304799	-1.07525	0.504342	-0.297275
ZNF490	-0.634124	0.526	-0.915885	0.359727	-1.09602	0.504236	-0.297366
CREBZF	-1.06142	0.288499	-0.449598	0.653	-1.06845	0.502858	-0.298555
HOXD3	-1.23692	0.216118	0.171285	0.864	-0.753515	0.500074	-0.300966
FLYWCH1	-0.599259	0.549	-0.95833	0.337896	-1.10138	0.49802	-0.302753
ZCCHC8	-0.950353	0.341933	-0.614326	0.539	-1.1064	0.495989	-0.304528
PBX3	-1.32583	0.184895	-0.0300841	0.976	-0.958779	0.489447	-0.310294
TBX19	-1.11073	0.266686	0.431644	0.666	-0.480183	0.484555	-0.314657
ZRANB3	-1.30045	0.193446	-0.105474	0.916	-0.99414	0.483834	-0.315304
ZRANB2	-0.825585	0.40904	-0.792821	0.427882	-1.14439	0.480056	-0.318708
TAF2	-0.73478	0.462474	-0.888396	0.374328	-1.14776	0.476727	-0.32173
ZNF331	-1.12641	0.259993	0.435775	0.663	-0.488352	0.475425	-0.322918
ZNF571	-0.304168	0.761	-1.21435	0.224614	-1.07375	0.47288	-0.325249
ZBED4	-1.0268	0.304516	-0.582842	0.56	-1.13819	0.472169	-0.325902
ZMYND12	0.177647	0.859	-1.29269	0.196118	-0.788456	0.468506	-0.329285
ZNF781	-1.03575	0.300319	-0.590284	0.555	-1.14978	0.465312	-0.332256
ZRANB1	-0.643345	0.52	-0.996268	0.31912	-1.15938	0.463994	-0.333488
ZNF197	-1.09281	0.274478	-0.518657	0.604	-1.13948	0.463711	-0.333753
TRAFD1	-1.12266	0.261581	-0.52872	0.597	-1.1677	0.446137	-0.350532
ZC3H18	-1.02366	0.305997	0.660396	0.509	-0.256866	0.445372	-0.351277
ZSCAN12	-1.1767	0.239316	-0.453762	0.65	-1.15291	0.445005	-0.351635
PSMC3IP	-1.13122	0.257961	-0.522963	0.601	-1.16969	0.444035	-0.352582
MSRB2	0.736452	0.461455	-0.967345	0.333372	-0.163266	0.441797	-0.354777
ZMYND11	-0.401571	0.688	-1.21918	0.222774	-1.14605	0.440733	-0.355824
HDAC1	-1.08949	0.275936	-0.59776	0.55	-1.19307	0.437906	-0.35862
ZNF461	-1.16845	0.242625	-0.488776	0.625	-1.17184	0.437672	-0.358851
HMG20A	-1.06426	0.287213	-0.632592	0.527	-1.19985	0.437144	-0.359375
PHTF1	-0.484544	0.628	-1.17299	0.2408	-1.17205	0.436882	-0.359636
ZNF785	-1.0478	0.294732	-0.654174	0.513	-1.20348	0.436835	-0.359683
ZNF212	-0.925007	0.354962	-0.813327	0.416031	-1.22919	0.430139	-0.366391
GATAD1	-0.685673	0.492919	-1.04378	0.296586	-1.22291	0.427297	-0.36927
ZNF638	-1.25912	0.207985	-0.388022	0.698	-1.16471	0.425334	-0.37127
ZNF71	-0.797722	0.425032	-0.977133	0.328504	-1.25501	0.414517	-0.382458
ZFYVE20	-1.34212	0.179557	-0.28976	0.772	-1.15391	0.412532	-0.384542
STAT5B	-1.08184	0.279325	-0.68525	0.493186	-1.24952	0.410832	-0.386336
TEAD1	-1.03238	0.301892	-0.749026	0.453841	-1.25965	0.409348	-0.387908
NR2C1	-1.04461	0.296206	-0.734958	0.462365	-1.25834	0.409236	-0.388027
ZNF167	-1.14087	0.253924	0.621912	0.534	-0.366958	0.406526	-0.390911
ZNF74	-1.33708	0.181196	-0.342466	0.732	-1.18762	0.400579	-0.397312
ZNF280D	-0.575431	0.565	-1.18992	0.234079	-1.24829	0.39981	-0.398147
ZNF226	-1.25728	0.208651	-0.477509	0.633	-1.22668	0.399448	-0.39854
FOXJ2	-0.329206	0.742	-1.34891	0.177366	-1.18661	0.398495	-0.399577
ZFYVE1	-0.875256	0.381435	-0.946227	0.344033	-1.28798	0.397724	-0.400418
ZNF415	-0.603765	0.546	-1.18553	0.235808	-1.26522	0.392675	-0.405967
AFF4	-0.620392	0.535	-1.1774	0.239035	-1.27123	0.390894	-0.407941
SP2	-1.12346	0.261242	-0.714678	0.474808	-1.29976	0.38293	-0.416881
ZNF644	-0.900525	0.367841	-0.963706	0.335193	-1.31821	0.381379	-0.418643
ZNF18	-0.758318	0.44826	-1.09346	0.274191	-1.30941	0.380564	-0.419572
HDX	-1.1256	0.260335	-0.719256	0.471983	-1.30451	0.38049	-0.419656
TAF4	-1.40753	0.15927	-0.293683	0.769	-1.20294	0.379662	-0.420603
IKZF5	-0.704842	0.480908	-1.13988	0.254337	-1.30441	0.379313	-0.421002
ZNF843	0.334503	0.738	-1.39735	0.162309	-0.751545	0.373974	-0.427159
MEIS2	-0.649524	0.516	-1.19801	0.230913	-1.3064	0.372629	-0.428724
ZNF684	-0.559237	0.576	-1.26521	0.205798	-1.29008	0.371326	-0.430245
ZCCHC16	0.823247	0.410367	-1.06369	0.287469	-0.170019	0.370105	-0.431675
MEIS3	-0.602262	0.547	-1.24076	0.214693	-1.30322	0.36897	-0.433009
FOXP4	-1.10251	0.27024	-0.786751	0.431428	-1.33591	0.367151	-0.435156
MZF1	-0.980777	0.326703	0.924024	0.355474	-0.0401298	0.366172	-0.436314
SMAD4	-1.13327	0.257103	-0.755594	0.449892	-1.33563	0.365169	-0.437506
ZNF839	-1.53008	0.125997	-0.111777	0.911	-1.16097	0.363256	-0.439787
DNMT3B	-1.29746	0.194474	-0.549008	0.583	-1.30565	0.360206	-0.443449
FUBP3	-1.12731	0.259611	0.786255	0.431718	-0.241163	0.357369	-0.446883
ZNF397	-0.90355	0.366234	-1.0266	0.304609	-1.36482	0.356229	-0.448271
FUBP1	-1.41115	0.158199	-0.37858	0.705	-1.26553	0.356168	-0.448345
ZMAT5	0.778566	0.436235	-1.13715	0.255474	-0.25356	0.355984	-0.44857
ZNF83	-0.964885	0.334602	-0.970893	0.331601	-1.3688	0.354903	-0.44989
ZBTB34	-1.29789	0.194325	-0.581357	0.561	-1.32883	0.350625	-0.455158
ZNF213	-0.990997	0.321687	-0.957649	0.33824	-1.3779	0.350161	-0.455732
TCF7L2	-1.45386	0.145986	-0.349119	0.727	-1.2749	0.344194	-0.463197
CUX1	-1.26471	0.205976	-0.668209	0.504	-1.36678	0.338964	-0.469847
ZMYM5	-0.757502	0.448749	-1.20874	0.226765	-1.39034	0.334297	-0.475868
ZNF407	-1.45239	0.146393	-0.401571	0.688	-1.31095	0.33191	-0.478979
ZNF512	-1.41098	0.158249	-0.500107	0.617	-1.35134	0.324796	-0.488389
ZNHIT3	-1.41186	0.157992	-0.500107	0.617	-1.35196	0.324426	-0.488884
PAX4	-0.161119	0.872	-1.59981	0.109641	-1.24516	0.320046	-0.494788
ZSCAN30	-1.65167	0.0986014	-0.0551738	0.956	-1.20692	0.316881	-0.499104
ALS2CR8	-0.844851	0.398194	-1.18641	0.235461	-1.43632	0.31569	-0.50074
RFXAP	-0.752945	0.451483	-1.26879	0.204516	-1.42958	0.312309	-0.505416
ZMYM2	-0.926957	0.353949	-1.12581	0.260244	-1.45153	0.311779	-0.506153
ZNF498	-0.897659	0.369368	-1.16894	0.242426	-1.46131	0.305617	-0.514823
ZNF248	-1.04206	0.297383	-1.03647	0.299985	-1.46974	0.30481	-0.515971
ZNF337	-1.67892	0.0931683	-0.0601954	0.952	-1.22974	0.303566	-0.517747
NPAT	-1.36524	0.172178	-0.657281	0.511	-1.43014	0.301835	-0.52023
ZNF202	-1.71386	0.0865551	-0.0125335	0.99	-1.22074	0.296231	-0.52837
ZSCAN16	-1.06091	0.288731	-1.04819	0.294551	-1.49136	0.294647	-0.530697
DZIP3	-0.762662	0.445665	-1.31337	0.189059	-1.46797	0.292699	-0.533579
ZFP90	0.279319	0.78	-1.61042	0.107307	-0.941229	0.291317	-0.535634
ZNF789	-1.41182	0.158002	-0.634124	0.526	-1.4467	0.289851	-0.537825
ZBTB44	-1.20045	0.229965	-0.921046	0.357026	-1.50012	0.287344	-0.541597
SREBF2	-0.966001	0.334043	-1.16419	0.244349	-1.50627	0.286141	-0.543419
ZBTB46	-0.231405	0.817	-1.64563	0.0998395	-1.32727	0.286006	-0.543626
TFCP2	-1.37998	0.167594	-0.696807	0.485923	-1.46851	0.285677	-0.544125
ZC3H8	-1.63911	0.101189	-0.253347	0.8	-1.33817	0.284456	-0.545985
ZC3HAV1L	-1.52339	0.127662	-0.476104	0.634	-1.41385	0.284421	-0.546039
ZNF589	-1.58198	0.113654	-0.379926	0.704	-1.38728	0.28209	-0.549612
ZNF828	-1.27435	0.202539	-0.852987	0.393666	-1.50425	0.281383	-0.550702
TCF25	-0.116823	0.907	-1.70743	0.0877419	-1.28994	0.281001	-0.551292
BPTF	-1.35135	0.176584	-0.770441	0.441038	-1.50033	0.276677	-0.558027
ZDHHC8	-1.27094	0.203751	-0.878897	0.379457	-1.52016	0.27523	-0.560304
ZDHHC16	-1.11214	0.26608	-1.06055	0.288894	-1.53632	0.274087	-0.562111
GRLF1	-1.29985	0.193651	-0.861615	0.388899	-1.52839	0.270075	-0.568516
BACH2	-1.5649	0.117607	-0.471897	0.637	-1.44023	0.269052	-0.570164
ZBTB39	-1.4077	0.159219	-0.730442	0.46512	-1.5119	0.266819	-0.573784
ZNF384	-1.39474	0.163095	-0.776258	0.437596	-1.53512	0.259778	-0.585398
ZFP28	-0.806281	0.420081	-1.37859	0.168022	-1.54494	0.257695	-0.588894
ZNF592	-1.35414	0.175692	-0.859455	0.390089	-1.56525	0.252238	-0.598189
SALL2	-1.27789	0.201289	-0.999598	0.317505	-1.61043	0.239681	-0.620366
ZNF471	-1.50548	0.132202	-0.706793	0.479695	-1.56431	0.238321	-0.622838
PHF1	-0.814794	0.415191	-1.43027	0.152639	-1.5875	0.238205	-0.62305
CREBBP	-1.2166	0.223757	-1.07801	0.281027	-1.62254	0.236844	-0.625537
ZNF438	-1.0835	0.278586	-1.23954	0.215147	-1.64264	0.228627	-0.640873
HIRA	-1.46717	0.14233	-0.809823	0.418042	-1.61008	0.227396	-0.643217
HOXC10	-0.897283	0.369568	-1.41304	0.157644	-1.63364	0.223885	-0.649976
RFX1	-1.64877	0.0991939	-0.551925	0.581	-1.55613	0.222094	-0.653463
TFDP1	-1.79637	0.0724364	-0.345126	0.73	-1.51426	0.208329	-0.681251
BAZ1B	-1.71505	0.0863352	-0.522963	0.601	-1.58252	0.205406	-0.687387
PATZ1	-1.35489	0.175451	-1.05496	0.291444	-1.70402	0.203172	-0.692137
ZNF618	-1.75066	0.0800039	-0.487365	0.626	-1.58252	0.200033	-0.698897
DBX2	0.068987	0.945	-1.93668	0.0527843	-1.32066	0.19943	-0.700209
ZSWIM3	-1.06372	0.287456	-1.37703	0.168503	-1.72587	0.195081	-0.709786
ZNF207	-1.21017	0.226214	-1.2498	0.211371	-1.73946	0.193193	-0.714009
ZKSCAN4	-1.57597	0.115033	-0.815062	0.415037	-1.69071	0.192974	-0.714502
ZFP2	-0.86411	0.387528	-1.54517	0.122304	-1.70362	0.191917	-0.716886
ZNF516	-1.39617	0.162662	1.07778	0.281132	-0.225138	0.186805	-0.728611
LZTR1	-1.30913	0.190491	-1.18186	0.237261	-1.7614	0.185157	-0.732461
ARNT	-1.21325	0.225034	-1.28495	0.198811	-1.76649	0.18374	-0.735797
ZNF3	-1.47609	0.13992	-0.999407	0.317597	-1.75044	0.182803	-0.738016
ZKSCAN5	-1.45414	0.145907	-1.03632	0.300051	-1.76102	0.180748	-0.742926
ZNF740	-1.31425	0.188761	-1.20632	0.227692	-1.78232	0.178237	-0.749001
ISL1	-1.38596	0.16576	-1.13602	0.255947	-1.78331	0.176491	-0.753276
ZNF642	-1.06376	0.287438	-1.45111	0.14675	-1.77828	0.175719	-0.755181
ZFP37	-0.649524	0.516	-1.74778	0.080502	-1.69515	0.17368	-0.760251
SMAD9	-1.60738	0.107971	-0.871863	0.383283	-1.75309	0.173185	-0.76149
TAF6	-1.63367	0.102328	-0.833788	0.4044	-1.74476	0.173179	-0.761506
ZNF33A	-1.17678	0.239285	-1.36283	0.172936	-1.79577	0.173177	-0.76151
ARNT2	-1.44978	0.14712	-1.09866	0.271917	-1.80202	0.168769	-0.772708
ASH2L	-1.36788	0.17135	-1.19316	0.232807	-1.81093	0.168405	-0.773645
ZNF691	-0.962314	0.335892	-1.56086	0.118558	-1.78415	0.168184	-0.774216
ZNF193	-1.4177	0.15628	-1.13972	0.254404	-1.80836	0.167976	-0.774752
KLF11	-1.03811	0.299219	-1.51048	0.13092	-1.80213	0.166087	-0.779664
CIC	-1.63076	0.102941	-0.91307	0.361206	-1.79876	0.159585	-0.797008
LZTS1	-1.96998	0.0488402	-0.322598	0.747	-1.6211	0.157277	-0.803335
CC2D1A	-1.30261	0.192707	-1.32408	0.185477	-1.85735	0.154816	-0.810183
SOX11	-1.59814	0.110012	1.00064	0.317001	-0.422497	0.151911	-0.818411
SMAD2	-1.33104	0.183177	-1.32241	0.186032	-1.87627	0.149227	-0.826153
ZDHHC14	-2.00774	0.0446705	0.308108	0.758	-1.20182	0.148495	-0.828289
EP300	-1.61452	0.106414	-1.02403	0.305822	-1.86574	0.144011	-0.841603
DMAP1	-0.795601	0.426264	-1.77901	0.0752384	-1.82052	0.14239	-0.84652
ZNF346	-1.00799	0.313459	-1.64801	0.0993509	-1.87808	0.139181	-0.856419
ESRRG	-1.9576	0.0502767	-0.504372	0.614	-1.74088	0.138235	-0.859383
MLLT10	-1.53457	0.124889	-1.1711	0.241557	-1.9132	0.135785	-0.867149
ZMYM1	-0.764596	0.444512	-1.83631	0.0663113	-1.83912	0.133355	-0.87499
ZDHHC15	-1.96081	0.0499017	-0.540286	0.589	-1.76854	0.133059	-0.875956
ZCCHC11	-0.932536	0.35106	-1.73574	0.0826098	-1.88676	0.131677	-0.880491
RLF	-0.660396	0.509	-1.90514	0.0567615	-1.81411	0.131289	-0.88177
HMBOX1	-1.78793	0.0737877	-0.868726	0.384997	-1.87854	0.129572	-0.88749
MTF2	-1.49319	0.135387	-1.25438	0.209705	-1.94282	0.129512	-0.88769
NR2C2	-1.64565	0.0998363	-1.07064	0.28433	-1.92071	0.129495	-0.887748
ONECUT2	-1.04503	0.296009	-1.66679	0.0955554	-1.91755	0.129134	-0.88896
LASS4	-1.54738	0.121771	-1.2036	0.228742	-1.94524	0.127594	-0.894171
ZZZ3	-1.02761	0.304133	-1.69193	0.0906586	-1.92301	0.126583	-0.897625
CREB1	-1.58916	0.112025	-1.16564	0.243759	-1.94794	0.125629	-0.90091
ZNF84	-1.76311	0.0778811	-0.938243	0.34812	-1.91015	0.124926	-0.903347
ZNF133	-1.95067	0.0510967	-0.638728	0.523	-1.83098	0.123522	-0.908256
ZNF678	-1.85011	0.0642977	-0.821608	0.4113	-1.88919	0.122514	-0.911815
PHF2	-1.43197	0.152154	-1.36321	0.172817	-1.97649	0.121965	-0.913765
ZNF232	-1.47425	0.140415	-1.3239	0.185536	-1.97859	0.121081	-0.916925
TFEB	-0.493018	0.622	-2.04962	0.040402	-1.79791	0.117701	-0.929218
TBP	-1.75769	0.0788004	-1.00254	0.316083	-1.95178	0.11688	-0.932258
ZBTB10	-1.42292	0.154761	-1.41823	0.156124	-2.00899	0.114116	-0.942654
ZNF425	-0.89772	0.369335	-1.84561	0.0649488	-1.93983	0.113468	-0.945128
ZHX3	-1.58409	0.113173	-1.26494	0.205894	-2.01457	0.110898	-0.955077
ZNF398	-1.28183	0.199903	-1.57118	0.116142	-2.01738	0.11058	-0.956324
HSF2	-1.78667	0.0739915	-1.01636	0.309459	-1.98204	0.109375	-0.961083
ZNF454	-1.26696	0.20517	-1.60432	0.108643	-2.0303	0.107074	-0.970316
ZMAT4	-2.13817	0.0325032	-0.408373	0.683	-1.80068	0.106729	-0.971718
VEZF1	-1.35706	0.174762	-1.57605	0.115015	-2.07402	0.0986324	-1.00598
DMTF1	-1.63667	0.1017	-1.28877	0.197479	-2.06859	0.0985675	-1.00627
ZHX2	-0.799224	0.424161	-1.98837	0.0467711	-1.97112	0.0976079	-1.01052
ZNF142	-2.07401	0.0380786	-0.674914	0.499731	-1.94378	0.094418	-1.02495
MAPK8IP1	-1.01099	0.31202	-1.87762	0.0604332	-2.04256	0.0937331	-1.02811
ZSCAN2	-1.80426	0.0711905	-1.11909	0.263102	-2.06712	0.0932326	-1.03043
ZNF10	-1.64779	0.0993955	-1.31605	0.188158	-2.09575	0.0931198	-1.03096
KDM1A	-1.44892	0.14736	-1.52956	0.126126	-2.1061	0.0926576	-1.03312
ZNF793	-2.08629	0.0369521	-0.698586	0.484811	-1.96921	0.0899703	-1.0459
CBFB	-0.609791	0.542	-2.13293	0.0329303	-1.9394	0.0897026	-1.04719
ZNF688	1.44961	0.147167	-1.55003	0.121135	-0.0710071	0.0896172	-1.04761
MNT	-1.97846	0.0478773	-0.895843	0.370337	-2.03244	0.0892291	-1.04949
MXD1	-1.85203	0.0640221	-1.09827	0.272085	-2.08618	0.0879711	-1.05566
ZEB1	-0.7151	0.474547	-2.0918	0.0364567	-1.98478	0.0874887	-1.05805
ZNF238	-2.0148	0.0439253	-0.868096	0.385342	-2.03852	0.0859665	-1.06567
RXRB	-1.60844	0.107738	-1.44333	0.148928	-2.15793	0.0823495	-1.08434
ZNF343	-1.22777	0.219535	-1.79401	0.072811	-2.13672	0.0820988	-1.08566
ZFYVE9	-1.53139	0.125673	-1.53849	0.123929	-2.17073	0.0803978	-1.09476
GPBP1L1	-1.63584	0.101873	-1.47338	0.140649	-2.19855	0.0751599	-1.12401
ZNF282	-1.88106	0.0599639	-1.19163	0.233407	-2.17272	0.0737447	-1.13227
NFRKB	-2.13638	0.0326484	-0.79644	0.425776	-2.07382	0.0733384	-1.13467
ZNF532	-2.36497	0.0180317	-0.294992	0.768	-1.88088	0.0731135	-1.136
PROX1	-1.28962	0.197181	-1.82875	0.0674374	-2.20502	0.0707446	-1.15031
FOXJ3	-1.4272	0.153521	-1.71533	0.0862855	-2.2221	0.0705252	-1.15166
ZSCAN20	-1.55869	0.119069	-1.62617	0.103914	-2.25204	0.066718	-1.17576
LASS6	-1.72957	0.083707	-1.4478	0.147673	-2.24674	0.0666667	-1.17609
SCAND3	-1.52786	0.126548	-1.67056	0.0948093	-2.26162	0.0650652	-1.18665
DNMT3A	-2.34245	0.0191574	-0.49585	0.62	-2.00698	0.0645322	-1.19022
TSHZ3	-1.20798	0.227057	-1.96049	0.0499385	-2.24044	0.0621316	-1.20669
ZNF250	-1.52965	0.126103	-1.72416	0.0846782	-2.3008	0.0591523	-1.22803
ZBTB22	-0.747657	0.454667	-2.27781	0.0227377	-2.13933	0.057603	-1.23955
GATAD2B	-1.53338	0.125182	-1.74431	0.0811054	-2.31768	0.0567548	-1.246
ZFP3	-1.54527	0.122281	-1.7399	0.0818761	-2.32297	0.0561065	-1.25099
GMEB1	-1.07837	0.280868	-2.1045	0.035335	-2.25063	0.0557035	-1.25412
KDM5B	-1.93856	0.0525555	-1.31675	0.187923	-2.30185	0.0554817	-1.25585
POU2F1	-1.93865	0.0525445	-1.32606	0.184821	-2.30849	0.0547181	-1.26187
SATB1	-2.02206	0.0431705	-1.21504	0.22435	-2.28897	0.0545975	-1.26283
SHOX2	-1.76203	0.0780636	-1.54643	0.122001	-2.33943	0.0538476	-1.26883
SOX15	-0.989906	0.32222	-2.1888	0.0286115	-2.24768	0.0524247	-1.28046
CARHSP1	-2.03898	0.0414516	-1.22302	0.221321	-2.30659	0.0522132	-1.28222
ZNF711	-2.34256	0.019152	-0.723074	0.469634	-2.16773	0.0513686	-1.2893
HIC2	-1.9664	0.0492529	-1.33919	0.180509	-2.3374	0.0508786	-1.29346
RORA	-1.40806	0.159114	-1.91416	0.0555996	-2.34916	0.0506712	-1.29524
ZNF623	-2.26299	0.0236363	-0.890053	0.373437	-2.22954	0.0505767	-1.29605
ZMIZ2	-1.97667	0.0480795	-1.38071	0.167367	-2.37403	0.0468529	-1.32926
TCF20	-2.01113	0.0443114	-1.34091	0.17995	-2.37025	0.0465002	-1.33255
ZDHHC18	-1.2183	0.223108	-2.11222	0.0346673	-2.35504	0.0453405	-1.34351
ZBTB48	-1.3321	0.182827	-2.03388	0.0419636	-2.38011	0.0450364	-1.34644
RFX7	-1.74065	0.0817458	-1.67798	0.0933508	-2.41733	0.0448364	-1.34837
RARA	-1.49688	0.134424	-1.92808	0.0538457	-2.42181	0.0429106	-1.36744
ZNF786	-2.15407	0.0312345	-1.21	0.226278	-2.37876	0.0420685	-1.37604
SCAND2	-1.51066	0.130874	-1.93146	0.0534264	-2.43395	0.0416938	-1.37993
ZNF827	-2.16541	0.0303564	-1.20026	0.23004	-2.37988	0.0416495	-1.38039
TADA2A	-2.0473	0.0406289	-1.37061	0.170496	-2.41683	0.0413707	-1.38331
ZCCHC12	-0.991324	0.321527	-2.32257	0.0202024	-2.34328	0.0392116	-1.40659
SOX5	-1.82805	0.0675417	-1.66427	0.0960585	-2.46945	0.039173	-1.40701
ZMYM4	-1.34778	0.177728	-2.09576	0.0361036	-2.43495	0.0388132	-1.41102
ZC3H13	-1.99491	0.0460523	-1.49124	0.1359	-2.46508	0.0380129	-1.42007
ZNF382	-2.12191	0.0338456	-1.33026	0.183433	-2.44105	0.0377585	-1.42299
NFYC	1.46031	0.144205	-2.02748	0.0426129	-0.401053	0.037436	-1.42671
ZBTB4	-1.6458	0.0998059	-1.87619	0.0606291	-2.49042	0.0369574	-1.4323
ZFHX4	-1.66356	0.0962006	-1.91038	0.0560846	-2.52715	0.0335712	-1.47403
GTF2I	-2.25275	0.0242751	-1.22096	0.222101	-2.45628	0.033551	-1.47429
RFX3	-1.89989	0.0574474	-1.67688	0.0935661	-2.52916	0.0334654	-1.4754
ZNF483	-1.09043	0.275525	-2.34119	0.0192223	-2.42652	0.0330524	-1.4808
ZCCHC17	-1.02151	0.307015	-2.38422	0.0171156	-2.40821	0.0328349	-1.48366
ZNF462	-2.23644	0.0253232	-1.27796	0.201264	-2.48505	0.0320027	-1.49481
ZNF70	-1.56088	0.118552	-2.03433	0.0419186	-2.5422	0.03133	-1.50404
CBL	-1.96038	0.0499513	-1.6502	0.0989017	-2.55307	0.0311747	-1.5062
ZBTB16	-0.612813	0.54	-2.60726	0.00912708	-2.27693	0.0311129	-1.50706
ZKSCAN1	-2.13	0.0331716	-1.45037	0.146954	-2.53171	0.0308262	-1.51108
BRD8	-2.62522	0.0086592	-0.62648	0.531	-2.2993	0.0293453	-1.53246
ZNF25	-1.65658	0.0976048	-2.01906	0.0434814	-2.59907	0.0274257	-1.56184
SMAD1	-2.41077	0.0159189	-1.12732	0.259608	-2.50181	0.0268162	-1.5716
ZDHHC17	-1.94465	0.0518165	-1.75293	0.0796143	-2.61459	0.0267759	-1.57226
PHOX2B	-2.02966	0.0423908	-1.68175	0.0926179	-2.62436	0.0256774	-1.59045
POU2F2	-1.76923	0.0768563	-1.95128	0.0510233	-2.6308	0.0256514	-1.59089
ZBTB17	-1.50337	0.132743	-2.18871	0.0286182	-2.61069	0.0249701	-1.60258
TCF4	-1.82964	0.0673031	-1.91289	0.0557622	-2.64637	0.0247141	-1.60706
CRTC2	-1.14524	0.25211	-2.45087	0.0142511	-2.54283	0.0238163	-1.62313
TSHZ1	-2.68132	0.00733332	-0.706563	0.479838	-2.39559	0.0233988	-1.63081
FOXP1	-0.839143	0.401389	-2.65777	0.00786592	-2.47269	0.0213371	-1.67086
TSC22D1	-1.64351	0.100278	-2.16608	0.0303053	-2.69378	0.0206535	-1.68501
ZNF706	-1.83521	0.0664749	-2.01352	0.0440603	-2.72146	0.0200136	-1.69868
ATF2	-1.71787	0.0858202	-2.13693	0.0326037	-2.72576	0.0192474	-1.71563
ZNF778	-1.277	0.201602	-2.46688	0.0136295	-2.64733	0.0189511	-1.72237
ZNF774	-1.55384	0.120224	-2.27717	0.0227763	-2.70893	0.0188951	-1.72365
ZC3H7B	-2.17394	0.0297095	-1.71385	0.0865565	-2.74908	0.0179063	-1.74699
LMO1	-1.34492	0.17865	-2.50014	0.0124143	-2.71887	0.0157714	-1.80213
PCGF2	-2.47272	0.0134088	-1.38871	0.164922	-2.73044	0.0157322	-1.80321
SPEN	-1.93476	0.0530192	-2.04016	0.0413342	-2.8107	0.0156105	-1.80658
ZC3H6	-2.28109	0.0225429	-1.6654	0.0958322	-2.7906	0.0154194	-1.81193
ZNF365	-1.18497	0.236028	-2.60978	0.00906003	-2.6833	0.0152848	-1.81574
ZNF318	-1.87111	0.0613304	-2.13916	0.032423	-2.83568	0.0143578	-1.84291
ZMYND8	-2.44991	0.0142891	-1.49504	0.134904	-2.7895	0.0139783	-1.85454
ZNF436	-1.70111	0.088922	-2.31978	0.0203528	-2.8432	0.013238	-1.87818
MLXIP	-2.08909	0.0366998	-1.98439	0.0472126	-2.88038	0.0127493	-1.89451
ZMYND17	-2.48598	0.0129197	-1.51604	0.129508	-2.82986	0.01237	-1.90763
ZDHHC21	-1.22313	0.221281	-2.67279	0.00752244	-2.75483	0.0123148	-1.90957
HIVEP2	-1.90897	0.0562655	-2.21019	0.0270917	-2.91269	0.0114114	-1.94266
ZNF512B	-2.07657	0.0378417	-2.11843	0.0341385	-2.96631	0.00988488	-2.00503
BAZ2A	-2.38037	0.0172953	-1.78333	0.0745333	-2.94418	0.00986635	-2.00584
ZBTB40	-2.23199	0.0256157	-1.96873	0.0489836	-2.97036	0.0096375	-2.01604
ZNF821	-1.33889	0.180607	-2.72688	0.0063937	-2.87493	0.0089653	-2.04744
JARID2	-1.99224	0.046345	-2.27433	0.0229464	-3.01692	0.00834408	-2.07862
L3MBTL4	-2.92857	0.0034052	-1.03619	0.300114	-2.80351	0.00805911	-2.09371
TRIM16	-2.61035	0.00904509	-1.59706	0.110252	-2.97509	0.00788865	-2.103
ZNF540	-1.87681	0.0605436	-2.43845	0.0147503	-3.05135	0.00716292	-2.14491
HAND2	-1.92471	0.0542657	-2.42795	0.0151846	-3.07779	0.00667551	-2.17552
TARDBP	-1.95441	0.0506523	-2.40374	0.0162284	-3.08168	0.00666134	-2.17644
MLL	-2.977	0.0029108	-1.14985	0.250208	-2.91812	0.00599014	-2.22256
ZNF800	-0.950969	0.34162	-3.09788	0.0019491	-2.86297	0.00553619	-2.25679
LCOR	-1.68009	0.0929394	-2.69907	0.00695339	-3.09653	0.00539247	-2.26821
ZNF287	-1.67089	0.0947431	-2.72152	0.00649831	-3.1059	0.0051672	-2.28674
INSM2	-1.13283	0.257285	-3.05653	0.00223918	-2.96232	0.00487342	-2.31217
ZNF76	-2.07579	0.0379136	-2.44949	0.0143057	-3.19986	0.00462084	-2.33528
HOXC8	-2.49598	0.0125608	-2.03193	0.0421607	-3.20172	0.00452438	-2.34444
ZNF596	-2.06039	0.0393615	-2.50308	0.0123119	-3.22686	0.00418328	-2.37848
PRDM2	-2.06749	0.038688	-2.49716	0.0125193	-3.22769	0.00418123	-2.3787
HINFP	-2.78475	0.00535689	-1.76298	0.0779038	-3.21573	0.00366478	-2.43595
PLAGL1	-2.84673	0.00441706	-1.68949	0.0911262	-3.20759	0.00354925	-2.44986
ZFHX3	-2.29123	0.02195	-2.3634	0.0181081	-3.29132	0.00350983	-2.45471
ZNF187	-1.94345	0.051962	-2.68987	0.00714801	-3.27625	0.003305	-2.48083
SALL4	-1.85856	0.0630889	-2.76447	0.00570146	-3.26898	0.0032122	-2.4932
PHOX2A	-1.9206	0.0547827	-2.73772	0.00618669	-3.29393	0.00304683	-2.51615
RORB	-1.33588	0.181588	-3.11911	0.00181395	-3.15016	0.00297054	-2.52716
GATA3	-2.03335	0.0420176	-2.65973	0.00782044	-3.3185	0.00296416	-2.5281
EBF4	-2.71145	0.00669895	-2.0015	0.0453387	-3.33256	0.00276368	-2.55851
ZBTB20	-1.83607	0.0663477	-2.89695	0.00376814	-3.34675	0.00232358	-2.63384
PRDM10	-2.84034	0.00450662	-1.99945	0.0455598	-3.42224	0.00194868	-2.71026
ZNF445	-2.9633	0.00304356	-1.82969	0.0672964	-3.38916	0.00194444	-2.71121
THRA	-1.57109	0.116161	-3.13158	0.00173868	-3.32529	0.00192018	-2.71666
PGBD1	-2.67672	0.00743467	-2.25041	0.0244231	-3.48401	0.00174566	-2.75804
SP4	-2.02655	0.0427087	-2.86085	0.00422508	-3.45591	0.00173592	-2.76047
SOX6	-2.27766	0.022747	-2.83005	0.0046541	-3.61169	0.0010749	-2.96863
SUPT6H	-2.72929	0.00634702	-2.41376	0.0157887	-3.63669	0.00102298	-2.99013
GATA2	-2.14929	0.0316117	-2.97598	0.00292057	-3.62411	0.000950036	-3.02226
ZNF804A	-2.05964	0.0394333	-3.05528	0.00224853	-3.61679	0.000915983	-3.03811
MORC2	-3.2145	0.00130671	-1.83476	0.0665419	-3.57036	0.000899959	-3.04578
ZNF641	-2.39515	0.0166137	-2.83032	0.00465012	-3.69497	0.00080874	-3.09219
ZZEF1	-3.14341	0.00166993	-2.04573	0.0407831	-3.66927	0.000721535	-3.14174
ZNF643	-2.22887	0.0258226	-3.0146	0.00257321	-3.70769	0.000705608	-3.15144
ZFPM2	-2.22424	0.0261325	-3.08348	0.00204594	-3.75312	0.000579378	-3.23704
MEIS1	-2.47083	0.01348	-2.89349	0.00380988	-3.79315	0.000558597	-3.2529
ZNF713	-2.71144	0.00669918	-2.68577	0.00723627	-3.8164	0.000530069	-3.27567
CSRNP2	-2.44048	0.0146678	-2.94889	0.00318914	-3.81086	0.000513157	-3.28975
ZKSCAN3	-3.13982	0.00169052	-2.21982	0.0264309	-3.78984	0.000492214	-3.30785
HAND1	-2.16781	0.0301733	-3.18871	0.00142911	-3.78763	0.000476553	-3.32189
CBFA2T2	-3.05468	0.00225297	-2.3799	0.0173172	-3.84283	0.000435081	-3.36143
CASZ1	-2.24799	0.0245767	-3.17301	0.00150868	-3.83323	0.000415371	-3.38156
ZFHX2	-2.90297	0.00369645	-2.60877	0.00908681	-3.89739	0.000379599	-3.42067
ATF7	-2.68481	0.00725714	-2.83701	0.00455383	-3.90451	0.00037402	-3.42711
ZMIZ1	-3.08235	0.00205376	-2.41381	0.0157868	-3.88637	0.000367562	-3.43467
KLF12	-2.70747	0.00677989	-2.87372	0.00405671	-3.94649	0.000316329	-3.49986
GRHL1	-1.84201	0.0654739	-3.56319	0.00036637	-3.82206	0.000279168	-3.55413
TULP4	-2.94491	0.0032305	-2.70669	0.00679569	-3.99629	0.000257439	-3.58933
TOX2	-2.23442	0.0254555	-3.33859	0.000842033	-3.94072	0.000251865	-3.59883
ZCCHC14	-2.79093	0.00525566	-2.89943	0.00373845	-4.02369	0.000232584	-3.63342
CSRNP3	-2.46954	0.0135285	-3.19086	0.0014185	-4.00251	0.000227617	-3.6428
ZNF624	-2.50358	0.0122942	-3.21784	0.00129159	-4.04566	0.000191351	-3.71817
MYT1L	-3.26878	0.00108014	-2.47507	0.0133209	-4.06151	0.000174806	-3.75744
TRERF1	-3.31141	0.000928283	-2.43344	0.014956	-4.06222	0.000169166	-3.77169
ZFAND3	-2.08527	0.0370452	-3.59681	0.000322149	-4.01783	0.00014722	-3.83203
EBF1	-2.36601	0.0179811	-3.42231	0.000620921	-4.09296	0.000138475	-3.85863
CREB5	-3.88211	0.000103554	-1.64379	0.100221	-3.9074	0.000129476	-3.88781
POU4F2	-3.80624	0.000141098	-1.80896	0.0704579	-3.97054	0.000124455	-3.90499
MYT1	-2.85712	0.00427501	-3.06836	0.00215238	-4.18995	0.000115903	-3.93591
IKZF4	-3.70676	0.000209925	-2.02268	0.0431062	-4.05133	0.000114135	-3.94258
CHD5	-2.78217	0.00539971	-3.14724	0.00164817	-4.19273	0.000112398	-3.94924
HOXC6	-2.60915	0.0090768	-3.30315	0.000956041	-4.18063	0.000109815	-3.95934
PBX1	-3.05332	0.00226325	-2.95984	0.00307801	-4.25194	8.96871e-05	-4.04727
KCNH8	-3.6897	0.000224514	-2.16035	0.0307453	-4.13662	8.89323e-05	-4.05094
CAMTA1	-2.93118	0.00337676	-3.08595	0.002029	-4.25476	8.83224e-05	-4.05393
ZFYVE27	-2.16571	0.0303333	-3.69313	0.000221512	-4.14283	8.67482e-05	-4.06174
JAZF1	-3.07446	0.00210887	-2.95823	0.00309411	-4.26575	8.44335e-05	-4.07349
SCMH1	-2.74433	0.00606339	-3.27611	0.00105247	-4.2571	8.27185e-05	-4.0824
L3MBTL1	-2.03862	0.0414877	-3.7886	0.000151498	-4.12047	8.15664e-05	-4.08849
ANKZF1	-3.74159	0.000182857	-2.15881	0.0308652	-4.17221	7.38503e-05	-4.13165
BAZ2B	-3.33377	0.00085676	-2.72087	0.00651102	-4.28128	7.30578e-05	-4.13633
AFF3	-2.95471	0.00312965	-3.13819	0.00169996	-4.30833	6.99298e-05	-4.15534
RUNX1T1	-3.01703	0.00255266	-3.0837	0.00204446	-4.31386	6.86963e-05	-4.16307
ZBTB8A	-2.50716	0.0121706	-3.53115	0.000413764	-4.26973	6.64666e-05	-4.1774
ZNF362	-3.07369	0.0021143	-3.06199	0.0021987	-4.33858	6.17301e-05	-4.2095
TSHZ2	-3.17684	0.00148889	-2.9755	0.00292512	-4.35036	5.81162e-05	-4.2357
ZFAND2B	-2.70715	0.0067863	-3.41593	0.00063564	-4.32968	5.76032e-05	-4.23955
TBX20	-2.34387	0.0190848	-3.72213	0.00019755	-4.28931	5.08539e-05	-4.29368
TAL2	-2.53553	0.0112277	-3.59587	0.000323303	-4.33556	4.90997e-05	-4.30892
ZNF34	-1.84564	0.0649446	-4.09262	4.26517e-05	-4.19899	3.82168e-05	-4.41775
RERE	-3.39282	0.000691783	-2.88143	0.00395879	-4.43656	3.78151e-05	-4.42234
HIVEP3	-3.13858	0.00169767	-3.1636	0.00155832	-4.45632	3.66208e-05	-4.43627
NCOR1	-3.54598	0.000391162	-2.71827	0.00656242	-4.42949	3.5611e-05	-4.44842
ZNF423	-2.85605	0.00428944	-3.52752	0.000419478	-4.51386	2.5601e-05	-4.59174
LASS5	-3.51276	0.000443484	-2.99348	0.00275818	-4.6006	1.7876e-05	-4.74773
SCML4	-3.14103	0.00168357	-3.61296	0.000302726	-4.77579	7.89439e-06	-5.10268
TFAP2B	-3.27039	0.001074	-3.49548	0.000473208	-4.78419	7.87357e-06	-5.10383
HOXC9	-3.46236	0.000535456	-3.49195	0.00047951	-4.91744	4.15307e-06	-5.38163
HMX1	-2.65291	0.00798004	-4.23714	2.26388e-05	-4.872	2.98569e-06	-5.52496
SOX4	-3.99847	6.37531e-05	-3.14249	0.00167518	-5.04942	1.82115e-06	-5.73965
KLF7	-3.42888	0.000606079	-3.99658	6.42634e-05	-5.25059	7.03453e-07	-6.15276

## Sheet: 11qLOH-marina
	TARGET-nes	TARGET-p.val	NRC-nes	NRC-p.val	stoufer-nes	fishers-p.val	logP*sign(nes)
ZNF530	4.42759	9.52924e-06	3.29221	0.000994028	5.45872	1.84473e-07	6.73407
E2F8	4.04136	5.31425e-05	3.0046	0.00265928	4.98225	2.37027e-06	5.6252
ZNF367	3.8407	0.000122685	3.06226	0.00219676	4.88113	4.34629e-06	5.36188
ZNF492	3.77394	0.000160689	3.09167	0.00199037	4.85472	5.10305e-06	5.29217
TOP2A	3.96356	7.38393e-05	2.84779	0.00440239	4.81635	5.18136e-06	5.28556
ZNF467	3.03285	0.00242257	3.72634	0.000194282	4.77947	7.32781e-06	5.13503
UHRF1	3.60051	0.000317594	3.14832	0.00164211	4.77214	8.06614e-06	5.09333
RCOR2	3.0914	0.00199215	3.55109	0.000383632	4.69695	1.15283e-05	4.93824
SCML2	3.58863	0.000332417	3.02586	0.00247927	4.67715	1.23696e-05	4.90764
PTTG1	3.74878	0.000177696	2.79963	0.00511613	4.63043	1.35556e-05	4.86788
ATAD2	3.67057	0.000242012	2.8334	0.00460556	4.599	1.63925e-05	4.78536
E2F1	3.30132	0.000962295	3.20676	0.0013424	4.60191	1.88077e-05	4.72566
ZDHHC23	2.94793	0.0031991	3.51062	0.000447065	4.56688	2.06775e-05	4.6845
HMGB2	3.51569	0.000438617	2.92078	0.00349158	4.55127	2.20367e-05	4.65685
MYBL2	3.33682	0.000847426	2.93279	0.00335932	4.43328	3.91982e-05	4.40673
ZNF43	3.76149	0.000168905	2.3564	0.0184532	4.326	4.26344e-05	4.37024
E2F3	3.2386	0.0012012	2.95713	0.0031052	4.38104	5.03512e-05	4.29799
CBX2	2.96328	0.00304384	3.1904	0.00142074	4.35131	5.77373e-05	4.23854
TCF19	3.47341	0.000513893	2.53776	0.0111565	4.25054	7.49291e-05	4.12535
FEV	3.39175	0.00069447	2.56641	0.0102756	4.21306	9.17016e-05	4.03762
FOXM1	3.10296	0.00191594	2.89702	0.00376723	4.24263	9.26689e-05	4.03307
E2F7	3.17892	0.00147824	2.77063	0.00559481	4.20697	0.000105058	3.97857
FOXN4	2.83143	0.00463406	3.11852	0.00181763	4.20725	0.000106842	3.97126
ZNF695	2.99485	0.00274582	2.93164	0.00337178	4.19066	0.000116562	3.93344
ZNF682	2.95321	0.00314491	2.96133	0.00306312	4.18221	0.0001209	3.91757
FOXK2	2.54065	0.0110646	3.27264	0.00106548	4.11062	0.000145576	3.83691
E2F2	3.17353	0.00150595	2.63825	0.00833343	4.10955	0.000154184	3.81196
CTCF	3.69321	0.000221437	1.85787	0.0631874	3.92521	0.000170381	3.76858
TBX2	2.36738	0.0179144	3.14726	0.00164808	3.89944	0.000337472	3.47176
MTA2	3.04007	0.00236522	2.46919	0.0135419	3.89564	0.000363498	3.4395
PSMC3IP	2.79106	0.00525355	2.74179	0.00611048	3.91232	0.000364246	3.43861
MYB	2.93355	0.00335113	2.56523	0.0103108	3.88822	0.000389514	3.40948
TRIM28	3.27084	0.0010723	2.04887	0.0404751	3.7616	0.00047937	3.31933
ZNF93	3.28789	0.00100941	1.95441	0.0506528	3.70687	0.000556347	3.25465
TAF5	3.26231	0.00110509	1.8966	0.0578812	3.6479	0.000681676	3.16642
ZNF519	2.74447	0.00606085	2.53856	0.0111311	3.73566	0.000715381	3.14546
MAZ	2.1837	0.0289843	2.99794	0.00271813	3.66397	0.000823191	3.0845
HNRNPAB	2.67988	0.00736475	2.52548	0.011554	3.68075	0.000882557	3.05426
NR6A1	1.73093	0.0834636	3.27363	0.00106176	3.53876	0.000915529	3.03833
ZNF85	2.87406	0.0040523	2.27616	0.0228362	3.64176	0.00095203	3.02135
ILF2	3.05897	0.002221	2.0363	0.0417203	3.6029	0.000953161	3.02083
PCGF6	3.05825	0.00222632	1.90063	0.0573502	3.50646	0.00127246	2.89536
TCF3	2.36037	0.0182568	2.63247	0.00847665	3.53047	0.00151254	2.82029
ZNF473	3.17104	0.00151895	1.50971	0.131118	3.30979	0.0018963	2.72209
ZNF443	2.54962	0.0107841	2.3431	0.0191242	3.45968	0.00195646	2.70853
ELK1	1.95369	0.0507382	2.85995	0.00423707	3.40376	0.00203049	2.6924
ZNF92	3.24844	0.00116041	1.30715	0.191162	3.22129	0.00208818	2.68023
TAF10	2.46399	0.0137401	2.37715	0.0174469	3.4232	0.00223805	2.65013
WHSC1	2.11974	0.0340279	2.69455	0.00704833	3.40422	0.00223903	2.64994
ZNF331	0.958776	0.337672	3.32687	0.00087826	3.03041	0.00270562	2.56773
ZNF8	2.78772	0.00530802	1.91001	0.0561321	3.3218	0.00271688	2.56593
YY1	2.78895	0.00528799	1.90389	0.0569251	3.31833	0.00274179	2.56197
ZNF497	2.82091	0.00478876	1.82661	0.0677584	3.28629	0.00293111	2.53297
ASCL1	2.48944	0.0127946	2.22273	0.0262342	3.332	0.00302072	2.51989
GABPB1	3.37334	0.000742631	0.687639	0.49168	2.87154	0.00325528	2.48741
ZNF408	2.12045	0.0339679	2.49696	0.0125262	3.26501	0.00372826	2.42849
ARNTL2	2.43963	0.0147022	2.17522	0.0296134	3.2632	0.00380493	2.41965
ZNF556	0.988448	0.322933	3.20501	0.00135059	2.96522	0.00381087	2.41898
PRKDC	2.76832	0.00563465	1.679	0.093152	3.14473	0.00448894	2.34786
SUPT4H1	2.81998	0.00480263	1.52751	0.126633	3.07414	0.00511173	2.29143
CEBPG	2.4597	0.0139051	2.00472	0.0449932	3.15682	0.0052408	2.2806
HOXD4	1.53548	0.124667	2.79851	0.00513398	3.06459	0.00534687	2.2719
HDGF	2.13271	0.0329488	2.33571	0.0195061	3.15965	0.00536647	2.27031
HOXD8	2.35795	0.0183763	2.09224	0.0364171	3.14676	0.00556075	2.25487
ZNF491	3.23378	0.00122163	0.575431	0.565	2.69352	0.00571398	2.24306
ZNF689	2.50385	0.0122851	1.8974	0.0577751	3.11215	0.00585601	2.2324
ZNF503	2.25901	0.0238825	2.10099	0.035642	3.08299	0.00686836	2.16315
NFATC3	2.92127	0.0034861	1.13179	0.257724	2.86594	0.00720093	2.14261
PLAGL2	1.96157	0.049812	2.36467	0.0180463	3.05911	0.00720424	2.14241
BCL11A	2.24067	0.0250477	2.07395	0.0380842	3.05089	0.00758838	2.11985
MXD3	1.61451	0.106417	2.57508	0.0100217	2.96249	0.00836478	2.07755
MLX	2.69296	0.00708199	1.43244	0.152017	2.9171	0.0084339	2.07397
ZNF584	2.12883	0.0332681	2.13529	0.0327376	3.01519	0.00851951	2.06959
E2F4	2.01391	0.0440186	2.23283	0.0255603	3.0029	0.00876459	2.05727
ZNF79	2.84622	0.0044241	1.1011	0.270852	2.79118	0.00925891	2.03344
ZNF652	2.15989	0.0307814	2.03827	0.0415228	2.96855	0.00979349	2.00906
ZNF768	2.21769	0.0265761	1.92965	0.0536508	2.93261	0.0107693	1.96781
ZNF664	2.73554	0.00622789	1.18812	0.234784	2.77445	0.0110072	1.95832
ZNF48	2.43385	0.0149393	1.64355	0.100269	2.88316	0.0112401	1.94923
ZNF560	1.48293	0.138094	2.54496	0.0109291	2.84815	0.0113134	1.94641
ZNF200	1.57884	0.114374	2.46238	0.0138019	2.85757	0.0117623	1.92951
MYCN	1.70436	0.0883142	2.35093	0.0187265	2.86752	0.012246	1.91201
HOXD9	0.392079	0.695	3.02172	0.00251343	2.41392	0.0128391	1.89146
ZNF239	1.85488	0.0636135	2.19752	0.0279831	2.86548	0.0130501	1.88439
ZNF107	2.12069	0.0339476	1.9237	0.054392	2.85982	0.0134691	1.87066
KDM5C	2.0067	0.0447816	2.03884	0.0414663	2.86063	0.0135348	1.86855
SOX30	1.74982	0.0801486	2.2701	0.0232015	2.84252	0.0135514	1.86802
NME2	1.71716	0.0859504	2.27695	0.0227894	2.82426	0.0141725	1.84855
INSM2	2.1554	0.0311308	1.84258	0.0653901	2.827	0.0146504	1.83415
PBX4	2.32722	0.0199535	1.62336	0.104513	2.79348	0.0149581	1.82512
ZNF434	2.28638	0.022232	1.669	0.0951183	2.79687	0.0151386	1.81991
ZDHHC12	1.4305	0.152572	2.44252	0.0145852	2.73864	0.0158171	1.80087
ADNP2	2.40027	0.0163829	1.49099	0.135963	2.75154	0.0158304	1.80051
CDKN2A	1.51227	0.130466	2.36516	0.0180222	2.74176	0.0165832	1.78033
PRDM15	2.12243	0.0338019	1.79197	0.0731377	2.7679	0.0173119	1.76166
ZMYND19	1.51556	0.129632	2.3181	0.0204438	2.7108	0.018374	1.7358
HOXD3	1.11224	0.266033	2.57217	0.0101064	2.60527	0.0186019	1.73044
ZNF646	1.77343	0.0761569	2.08395	0.0371645	2.72758	0.0194369	1.71137
ZNF256	2.13943	0.032401	1.69727	0.0896455	2.71296	0.0198717	1.70176
ZFP91	2.08171	0.0373686	1.75569	0.0791407	2.71346	0.0201795	1.69509
NAT14	2.11944	0.0340536	1.67839	0.0932718	2.68547	0.0214461	1.66865
ZNF219	1.74057	0.0817588	2.05577	0.0398047	2.68442	0.0218947	1.65966
TBL1X	0.802185	0.422446	2.63972	0.00829753	2.43379	0.0233222	1.63223
SCRT2	1.35893	0.17417	2.3217	0.0202489	2.6026	0.0234437	1.62997
MYST2	2.2223	0.0262632	1.48597	0.137288	2.62214	0.0238882	1.62182
BAZ1A	2.12979	0.0331886	1.59052	0.111718	2.63066	0.0244614	1.61152
ZNF280C	2.11389	0.034525	1.57788	0.114594	2.61047	0.0258445	1.58763
PA2G4	2.02393	0.0429773	1.66552	0.0958083	2.60884	0.0267333	1.57295
HOXD10	1.17643	0.239423	2.37387	0.0176029	2.51044	0.0272648	1.5644
UBN1	1.42684	0.153625	2.19922	0.0278621	2.56402	0.0276239	1.55871
DNMT3B	1.87741	0.0604617	1.7954	0.0725903	2.59707	0.028215	1.54952
ZNF581	2.04601	0.040755	1.60751	0.107943	2.58343	0.0282709	1.54866
C11orf9	1.20347	0.228793	2.30167	0.0213536	2.47851	0.0308838	1.51027
DRAP1	2.12815	0.033325	1.43913	0.150112	2.52245	0.0315048	1.50162
ZNF195	1.44368	0.148829	2.12323	0.0337343	2.52219	0.031601	1.5003
SOX11	0.665079	0.506	2.57136	0.0101301	2.28851	0.0321567	1.49273
ZDHHC13	2.35687	0.0184295	1.07945	0.280387	2.42985	0.0323756	1.48978
RBL1	2.10403	0.0353761	1.40603	0.159715	2.48199	0.0348954	1.45723
VEZF1	2.14109	0.0322671	1.35312	0.176018	2.47078	0.035048	1.45534
ZNF227	2.16066	0.0307216	1.29921	0.193872	2.4465	0.0364709	1.43805
MRPL28	1.97222	0.0485851	1.54323	0.122775	2.4858	0.0365169	1.43751
ZNF410	2.3972	0.0165207	0.908443	0.363644	2.33745	0.0367352	1.43492
ZNF135	1.12545	0.260399	2.26345	0.023608	2.39631	0.0374488	1.42656
ZNF511	2.1575	0.0309667	1.28157	0.199995	2.43179	0.0376812	1.42387
ZNF280B	1.59679	0.110314	1.89599	0.0579618	2.46976	0.0386989	1.4123
ZBTB26	2.27277	0.0230402	1.06626	0.286307	2.36105	0.0397193	1.401
ZNF420	2.55887	0.0105013	0.407011	0.684	2.09719	0.0426381	1.3702
ZNF526	1.80081	0.0717334	1.59454	0.110814	2.40088	0.0463805	1.33366
GATAD2A	1.45316	0.14618	1.91299	0.0557499	2.38022	0.047347	1.32471
ZNF574	1.85774	0.0632065	1.51177	0.130593	2.3826	0.0478506	1.32011
MBD1	2.06296	0.0391167	1.2474	0.21225	2.34078	0.0480816	1.31802
E4F1	1.3163	0.188073	2.0109	0.0443359	2.35269	0.0482534	1.31647
USF2	1.72778	0.0840269	1.64841	0.0992687	2.38733	0.0482669	1.31635
ZNF263	2.03899	0.0414509	1.27076	0.203813	2.34035	0.0487784	1.31177
ZNF280A	0.353118	0.724	2.51315	0.0119657	2.02676	0.0498019	1.30275
ZBTB3	2.13741	0.0325645	1.08236	0.279092	2.27672	0.0518113	1.28558
ZC3H14	1.89917	0.0575426	1.41013	0.158502	2.34002	0.0519622	1.28431
ZNF174	2.20875	0.0271923	0.938705	0.347882	2.22558	0.0535488	1.27125
CGGBP1	2.4567	0.0140219	0.419296	0.675	2.03364	0.0535724	1.27106
ZNF276	1.7785	0.0753219	1.52383	0.127552	2.3351	0.0542362	1.26571
THAP11	1.62286	0.10462	1.67973	0.0930091	2.33528	0.0548074	1.26116
SP2	1.58852	0.112169	1.70187	0.088779	2.32666	0.0558594	1.2529
DLX6	1.5157	0.129595	1.76926	0.0768511	2.32281	0.0558654	1.25286
DLX5	0.538836	0.59	2.35971	0.018289	2.04958	0.0596617	1.2243
SCML1	1.10982	0.267077	2.02104	0.0432761	2.21385	0.0631112	1.19989
YEATS4	2.39677	0.0165405	0.366489	0.714	1.95392	0.0642319	1.19225
TBX4	0.945169	0.344573	2.10752	0.0350723	2.15858	0.0654496	1.18409
LMO4	2.19684	0.0280319	0.779557	0.435651	2.10463	0.0660106	1.18039
ATF5	0.825227	0.409243	2.17025	0.0299876	2.11812	0.0662751	1.17865
ZNF576	1.27061	0.203869	1.87131	0.0613023	2.22167	0.067265	1.17221
ZDHHC5	1.64288	0.100408	1.53404	0.125019	2.24642	0.0675072	1.17065
CNBP	2.28184	0.022499	0.569525	0.569	2.01622	0.0685947	1.16371
ZSCAN29	2.03409	0.0419428	1.00818	0.313366	2.15121	0.0700786	1.15441
ZNF22	2.34007	0.0192802	0.401571	0.688	1.93863	0.0706037	1.15117
ZNF146	2.11442	0.0344796	0.865819	0.386589	2.10735	0.0708831	1.14946
RFXANK	1.51014	0.131008	1.6338	0.102301	2.2231	0.0711969	1.14754
ZNF430	2.46983	0.0135177	-0.00501328	0.996	1.74289	0.0714616	1.14593
CCRN4L	0.954874	0.339641	2.03443	0.041908	2.11376	0.0747573	1.12635
ZNF281	1.98588	0.0470469	1.02866	0.30364	2.1316	0.0749768	1.12507
ZNF124	2.04023	0.0413271	0.942142	0.34612	2.10886	0.0750567	1.12461
ZBTB33	1.95485	0.0506013	1.06902	0.28506	2.1382	0.0755671	1.12167
TAF9B	1.89515	0.0580728	1.14506	0.252184	2.14975	0.0765007	1.11633
ZNF839	-0.419296	0.675	2.28987	0.0220287	1.3227	0.0774464	1.111
ZNF764	1.70694	0.0878333	1.36933	0.170896	2.17525	0.078039	1.10769
ZNF81	1.59423	0.110884	1.49218	0.135653	2.18242	0.0781705	1.10696
RRN3	1.99549	0.045989	0.959544	0.337285	2.08953	0.0801347	1.09618
ENO1	1.44741	0.147782	1.61855	0.105544	2.16796	0.0804932	1.09424
ZFAT	1.74279	0.0813698	1.29004	0.197035	2.14454	0.082298	1.08461
ZNF101	1.44384	0.148784	1.60438	0.108631	2.15541	0.0828341	1.08179
ILF3	1.2584	0.208249	1.74551	0.0808965	2.12408	0.0856414	1.06732
ZNF620	1.7417	0.0815607	1.26028	0.207569	2.12272	0.0859796	1.0656
ZNF185	-1.17052	0.241793	1.80992	0.0703077	0.452129	0.086267	1.06416
ZNF324B	1.42564	0.153971	1.59397	0.110944	2.13519	0.0866017	1.06247
YY2	1.52976	0.126077	1.47369	0.140565	2.12376	0.0891941	1.04966
ZNF567	2.14841	0.0316808	0.579873	0.562	1.92919	0.0895269	1.04805
SOX12	1.14952	0.25034	1.78483	0.074289	2.0749	0.0927036	1.0329
ZDHHC24	0.798486	0.424589	2.00893	0.0445451	1.98514	0.0939593	1.02706
ZSCAN22	1.93951	0.0524388	0.912548	0.36148	2.01671	0.0941269	1.02629
TWIST1	0.68616	0.492612	2.06949	0.0384997	1.94854	0.094166	1.02611
ZNF747	1.70795	0.0876451	1.23462	0.216973	2.08071	0.0943689	1.02517
ZFP90	2.19088	0.0284601	-0.423405	0.672	1.2498	0.0947989	1.0232
ATF1	2.12051	0.0339634	0.556308	0.578	1.89279	0.0967929	1.01416
TFAP4	0.735337	0.462134	2.02422	0.0429474	1.9513	0.0976432	1.01036
DBP	1.32305	0.185818	1.61192	0.106979	2.07534	0.0977649	1.00982
ZFPL1	1.63939	0.101132	1.28544	0.19864	2.06816	0.0985881	1.00618
BATF	1.69859	0.0893958	1.21032	0.226154	2.05692	0.0990891	1.00397
ZNF334	1.51012	0.131014	1.42178	0.155091	2.07316	0.099486	1.00224
TFAM	1.91014	0.0561146	0.907326	0.364234	1.99225	0.0999525	1.00021
ZBTB6	2.2935	0.0218191	0.0501536	0.96	1.65722	0.10192	0.991739
NFYB	2.16389	0.030473	0.369171	0.712	1.79114	0.104808	0.979604
THAP7	1.74076	0.0817263	1.11205	0.266116	2.01724	0.105007	0.978782
NFYA	1.6841	0.0921624	1.17864	0.238542	2.02426	0.105909	0.975067
GCFC1	2.28049	0.0225786	-0.0300841	0.976	1.59128	0.106108	0.974253
YBX2	1.92265	0.0545244	0.831011	0.405967	1.94713	0.106483	0.97272
ZNF680	2.05749	0.039639	0.573952	0.566	1.86071	0.107626	0.968082
AATF	1.10411	0.269548	1.72841	0.0839149	2.00289	0.108322	0.965284
RNF4	1.92192	0.054616	0.815246	0.414932	1.93547	0.108484	0.964633
ZNF688	2.07395	0.0380842	0.520091	0.603	1.83426	0.109629	0.960075
ESRRA	1.43234	0.152045	1.41993	0.155628	2.01686	0.112252	0.949807
ZNF557	2.12	0.0340059	0.38532	0.7	1.77153	0.112781	0.947762
ZNF273	1.97355	0.0484335	0.684966	0.493365	1.87985	0.113122	0.946451
ZNF607	1.39249	0.163775	1.44363	0.148844	2.00543	0.114916	0.93962
ZNF214	1.45636	0.145292	1.34596	0.178317	1.98154	0.120555	0.918813
RELA	1.17419	0.24032	1.59848	0.109937	1.96057	0.12242	0.912146
ZC3HC1	1.48525	0.137476	1.2924	0.196219	1.9641	0.124433	0.905063
SOLH	1.26476	0.205957	1.50511	0.132296	1.95859	0.125414	0.901654
ZSWIM1	2.15628	0.0310617	-0.152237	0.879	1.41707	0.125615	0.900957
ZCCHC3	1.45039	0.146949	1.30904	0.190521	1.95121	0.128104	0.892436
ZNF598	1.02157	0.306982	1.68181	0.0926049	1.91158	0.129643	0.887252
TCFL5	1.87626	0.0606198	0.718095	0.472698	1.83449	0.130449	0.884558
HELZ	1.55383	0.120224	1.15345	0.248725	1.91434	0.134856	0.870131
ZNF572	2.11254	0.0346402	-0.1143	0.909	1.41297	0.140378	0.852701
PRDM8	1.39268	0.163717	1.29911	0.193906	1.90338	0.141269	0.849954
NOLC1	1.57693	0.114812	1.08729	0.276907	1.88389	0.141428	0.849463
ZNF302	2.07198	0.0382673	0.201893	0.84	1.60787	0.142642	0.845753
ZC3H18	0.262417	0.793	2.04625	0.040732	1.63247	0.143178	0.844125
ZNF114	1.10509	0.269121	1.5544	0.120088	1.88055	0.143238	0.843941
ZNF507	1.97534	0.0482299	0.424776	0.671	1.69714	0.14339	0.843482
ZNF639	1.72674	0.0842138	0.863527	0.387848	1.8316	0.144417	0.840382
ZNF253	1.94262	0.0520622	0.483135	0.629	1.71527	0.144708	0.839509
ZMYM3	1.02309	0.306264	1.60323	0.108883	1.85709	0.146753	0.833413
KLF16	1.16123	0.245549	1.47574	0.140014	1.86462	0.150251	0.823182
ZNF274	2.00098	0.0453941	-0.305481	0.76	1.1989	0.150653	0.822023
ZNF844	1.80209	0.0715307	-0.694737	0.48722	0.783019	0.151835	0.818628
SIX4	1.10227	0.270343	1.51666	0.129351	1.85187	0.152231	0.817497
ZNF121	1.13217	0.257561	1.48448	0.137681	1.85025	0.153878	0.812824
CIZ1	1.6502	0.0989017	0.91316	0.361158	1.81257	0.154738	0.810403
ZNF673	1.3911	0.164196	1.23144	0.218158	1.85442	0.155076	0.809456
PAX5	1.30338	0.192444	1.31487	0.188554	1.85138	0.156623	0.805146
ZNF562	1.83023	0.0672149	0.608283	0.543	1.72429	0.157323	0.803206
ZNF460	1.73086	0.0834765	0.769878	0.441372	1.76829	0.158469	0.800055
ZNF561	1.86063	0.0627967	0.521527	0.602	1.68444	0.161624	0.791495
ZBED4	1.71113	0.0870566	0.778633	0.436196	1.76053	0.162181	0.790001
SOX5	1.81455	0.0695927	0.59776	0.55	1.70576	0.163168	0.787365
ZNF180	1.92923	0.053702	-0.341138	0.733	1.12295	0.166701	0.778061
STAT5B	-1.14557	0.251973	1.40984	0.158586	0.186868	0.168625	0.773079
ZNF480	2.04352	0.0410005	0.0263226	0.979	1.4636	0.169204	0.77159
ZCCHC16	1.50495	0.132336	1.02254	0.306524	1.78721	0.170568	0.768104
CITED1	1.21463	0.224508	1.33691	0.181253	1.80421	0.170979	0.767057
HMGA1	0.727153	0.467132	1.7086	0.0875251	1.72234	0.171597	0.765491
ECSIT	1.5633	0.117982	0.932002	0.351336	1.76444	0.173401	0.760949
MEF2B	1.15635	0.247537	1.36776	0.171388	1.78482	0.176488	0.753284
ZBTB5	1.91847	0.0550512	-0.28976	0.772	1.15167	0.176724	0.752704
HES6	1.40093	0.161236	1.09237	0.274671	1.76303	0.182332	0.739138
ZBTB25	1.43932	0.150059	1.04284	0.297024	1.75515	0.183217	0.737035
BCL11B	1.54687	0.121895	0.892855	0.371935	1.72515	0.185593	0.731439
NR1D1	-0.556308	0.578	1.72963	0.0836964	0.829663	0.194897	0.710196
ZNF570	1.93089	0.0534972	-0.113039	0.91	1.28541	0.195822	0.708138
ZDHHC9	0.929341	0.352712	1.47877	0.139203	1.70279	0.197078	0.705362
MAFG	-0.375888	0.707	1.80626	0.0708777	1.01143	0.200118	0.698715
TAF7	1.68674	0.091653	0.599259	0.549	1.61645	0.200737	0.697373
ZMAT5	1.24063	0.214741	-1.18868	0.234567	0.0367399	0.200897	0.697026
CNOT8	1.38744	0.165307	-1.00645	0.314197	0.269398	0.205558	0.687065
ZNF230	1.77582	0.0757628	0.392079	0.695	1.53294	0.207671	0.682623
ALX3	1.24582	0.21283	1.14796	0.250987	1.69266	0.20991	0.677966
ZNHIT2	1.314	0.188848	1.07369	0.282961	1.68835	0.209966	0.677851
LHX2	1.28206	0.199821	1.10531	0.269024	1.68813	0.210902	0.675919
NR2F6	1.36631	0.171843	1.00536	0.314722	1.67702	0.211855	0.673962
ZDHHC22	-0.61584	0.538	1.63821	0.101377	0.722927	0.21319	0.671233
SCAND1	1.22178	0.221792	1.15205	0.249302	1.67855	0.215373	0.666808
ZFP82	1.62817	0.103489	0.581357	0.561	1.56237	0.223308	0.651096
SPIB	1.15967	0.246182	1.18313	0.236757	1.65661	0.223955	0.649839
BACH1	1.82029	0.068715	0.171285	0.864	1.40826	0.227028	0.64392
ETV4	0.808003	0.419089	1.45756	0.144962	1.602	0.230915	0.636548
ZNF398	1.49538	0.134815	0.738159	0.460418	1.57935	0.234596	0.629679
ZBTB7B	1.22106	0.222062	1.07322	0.283172	1.6223	0.236844	0.625538
ZNF496	1.01721	0.309054	1.27123	0.203646	1.61817	0.236999	0.625254
ZNF428	1.57456	0.115358	0.603765	0.546	1.54031	0.237131	0.625012
HSF1	1.65419	0.0980896	0.444059	0.657	1.48368	0.241149	0.617714
GLIS2	1.01796	0.308695	1.24787	0.212078	1.60219	0.243945	0.612707
PREB	1.08554	0.277683	1.17525	0.239894	1.59862	0.247062	0.607194
BNC1	1.29332	0.195901	0.949209	0.342514	1.58571	0.248372	0.604897
ZNF169	0.926971	0.353942	1.30559	0.19169	1.57866	0.25039	0.601383
THAP1	1.45689	0.145147	-0.725466	0.468166	0.517194	0.250675	0.60089
ZNF785	0.83266	0.405037	1.37486	0.169176	1.56095	0.252204	0.598249
TAF5L	1.22484	0.220636	1.00198	0.316355	1.57459	0.255615	0.592414
CXXC1	1.45851	0.144701	0.7009	0.483366	1.52693	0.255997	0.591765
IRF4	1.15738	0.247116	1.0726	0.283451	1.57684	0.256269	0.591305
IRX3	1.47977	0.138934	0.665079	0.506	1.51664	0.256947	0.590156
ZCCHC10	1.33436	0.182086	-0.863767	0.387716	0.332759	0.257735	0.588827
ZNF554	1.1842	0.236336	1.03467	0.300824	1.56897	0.259053	0.586611
MTA1	1.03345	0.301393	1.18495	0.236036	1.56865	0.25917	0.586415
ZNF566	1.73904	0.082027	0.166199	0.868	1.34721	0.259328	0.586151
ZNF7	1.5461	0.122082	0.546096	0.585	1.4794	0.259904	0.585187
ZNF571	1.32929	0.183751	-0.841882	0.399854	0.344652	0.2653	0.576262
FIZ1	1.10774	0.267973	1.0804	0.279965	1.54725	0.269329	0.569717
TLX2	0.693719	0.487858	1.42191	0.155051	1.49598	0.270933	0.567139
ZNF317	1.24041	0.214822	0.926582	0.354143	1.5323	0.272054	0.565344
ZNF668	0.267609	0.789	1.66095	0.0967237	1.3637	0.272665	0.564371
ZNF45	1.69164	0.090715	0.19678	0.844	1.33531	0.273304	0.563354
ZDHHC4	0.856951	0.391472	1.29374	0.195754	1.52077	0.27348	0.563075
ZNF569	1.33472	0.181969	0.80409	0.421345	1.51236	0.273582	0.562912
ZNF675	1.69399	0.0902671	-0.166199	0.868	1.08031	0.277878	0.556145
ZNF14	1.61722	0.105831	0.325239	0.745	1.37353	0.27913	0.554194
NFATC1	0.841327	0.400165	1.28862	0.197531	1.5061	0.279641	0.5534
ZFP64	1.72675	0.0842122	-0.0376083	0.97	1.1944	0.286299	0.543181
ZC3H10	1.5196	0.128612	0.467699	0.64	1.40523	0.287864	0.540813
ZFP1	1.53745	0.124183	-0.434397	0.664	0.779977	0.288228	0.540264
HCFC1	0.836665	0.402781	1.2661	0.205479	1.48688	0.288989	0.539118
ZNF627	1.57835	0.114486	-0.333178	0.739	0.880466	0.29356	0.532303
SMARCA4	0.891703	0.372552	1.19706	0.231285	1.47698	0.297399	0.52666
ZNF414	1.04454	0.296234	1.05582	0.291049	1.48518	0.297529	0.52647
ZNF354C	1.46483	0.142966	-0.51436	0.607	0.672087	0.298904	0.524468
FOXP3	1	0.317308	1.09204	0.274814	1.4793	0.299931	0.522979
ZNF223	1.32873	0.183938	-0.708631	0.478554	0.438474	0.301936	0.520085
FOSL1	1.01851	0.308435	1.05037	0.293549	1.46292	0.308016	0.511427
SCYL1	1.22324	0.221237	0.815603	0.414727	1.44168	0.31092	0.507352
ZNF771	0.164929	0.869	1.61722	0.105832	1.26017	0.311432	0.506637
NHLH2	0.813352	0.416016	1.2196	0.222618	1.43751	0.312969	0.504499
ZNF488	0.940906	0.346753	1.10745	0.268101	1.4484	0.313806	0.503339
ZNF205	1.19125	0.233555	0.844512	0.398383	1.4395	0.313994	0.503078
MIXL1	0.982809	0.325701	1.06387	0.287389	1.44722	0.31532	0.501249
ZNF100	0.826182	0.408701	1.20018	0.230069	1.43286	0.316329	0.499862
ZFYVE21	1.48525	0.137478	0.40565	0.685	1.33707	0.316668	0.499396
ZFP30	1.62819	0.103484	0.111777	0.911	1.23034	0.316907	0.499068
ZNF77	0.379926	0.704	1.48984	0.136266	1.32213	0.320806	0.493757
NFX1	1.15372	0.248616	0.866554	0.386186	1.42855	0.320995	0.493501
RELB	1.38097	0.167288	0.53594	0.592	1.35546	0.32803	0.484086
ZNF510	1.47402	0.140477	-0.369171	0.712	0.781243	0.330304	0.481086
ZNF653	1.29718	0.19457	0.637192	0.524	1.3678	0.334741	0.475291
LYL1	0.879307	0.379235	1.09776	0.272309	1.398	0.337733	0.471426
BATF2	0.895803	0.370358	1.07983	0.280218	1.39698	0.338894	0.469937
ZNF385A	1.2471	0.212362	0.689009	0.490818	1.36903	0.339912	0.468633
ZBTB39	0.921636	0.356719	1.048	0.294639	1.39274	0.341881	0.466125
ZNF830	1.57022	0.116364	-0.1143	0.909	1.02949	0.343392	0.46421
BUD31	0.605269	0.545	1.28698	0.198101	1.33802	0.348289	0.45806
RUNX3	1.04181	0.297499	0.905842	0.365019	1.3772	0.349685	0.456323
EOMES	1.03485	0.300741	0.906493	0.364675	1.37273	0.352077	0.453362
ZNF141	1.47769	0.139491	0.265012	0.791	1.23228	0.353545	0.451555
ZNF75A	1.39605	0.162701	0.412463	0.68	1.27881	0.354203	0.450747
HIF1A	1.07555	0.282129	0.85323	0.393532	1.36385	0.355061	0.449697
BPTF	0.709788	0.477836	1.18515	0.23596	1.33992	0.358836	0.445104
ZC4H2	-0.702734	0.482221	1.18151	0.237401	0.338545	0.362598	0.440574
ZNF324	0.905397	0.365255	1.00742	0.313731	1.35257	0.362841	0.440284
NKX3-1	0.657281	0.511	1.19488	0.232136	1.30967	0.371501	0.43004
PFDN1	1.40422	0.160253	-0.321278	0.748	0.765757	0.374154	0.42695
SIX2	0.608283	0.543	1.22151	0.221894	1.29386	0.375466	0.425429
ATF4	1.44318	0.148971	-0.241716	0.809	0.84956	0.375528	0.425358
HOXD1	0.94716	0.343557	0.924492	0.35523	1.32346	0.378744	0.421655
ZFPM1	0.848216	0.396318	1.01228	0.311406	1.31557	0.381626	0.418363
ZNF32	1.44033	0.149775	0.219835	0.826	1.17391	0.38225	0.417652
ZNF296	0.944215	0.34506	0.913431	0.361016	1.31355	0.38404	0.415624
SLC2A4RG	0.553385	0.58	1.23344	0.217411	1.26348	0.38721	0.412054
IRF7	0.672917	0.501	1.14041	0.254116	1.28221	0.389717	0.40925
ZNF862	0.782371	0.433996	1.04746	0.294886	1.29389	0.391091	0.407722
NR1H3	1.45864	0.144665	0.142101	0.887	1.13189	0.391787	0.40695
ZNF776	1.27745	0.201443	0.469097	0.639	1.235	0.392615	0.406033
MSRB2	0.991571	0.321407	-0.828852	0.407188	0.11506	0.397007	0.401202
ZNF614	1.24177	0.214321	-0.504372	0.614	0.521421	0.398469	0.399606
STRN3	1.48779	0.136807	0.0451346	0.964	1.08394	0.399056	0.398967
VAX2	0.70452	0.481109	1.09299	0.274398	1.27103	0.399324	0.398674
ZFX	0.909059	0.363319	0.902899	0.36658	1.28125	0.401689	0.39611
BAZ1B	0.554846	0.579	1.19292	0.232902	1.23585	0.405035	0.392507
ZNF3	1.22653	0.22	0.49585	0.62	1.2179	0.408132	0.3892
ZSCAN1	0.684622	0.493583	1.08566	0.27763	1.25178	0.409391	0.387861
ZRSR2	-0.199336	0.842	1.39412	0.16328	0.844843	0.410282	0.386917
ONECUT1	0.717025	0.473359	1.05529	0.291293	1.25321	0.411084	0.38607
SNAPC4	0.128188	0.898	1.42707	0.15356	1.09973	0.411105	0.386047
ZNF329	1.41209	0.157924	0.150969	0.88	1.10525	0.413232	0.383806
HIF3A	0.641805	0.521	1.11056	0.266759	1.23911	0.413249	0.383788
ZNF595	1.05361	0.292059	0.711167	0.476981	1.24789	0.413891	0.383114
C14orf43	-0.582842	0.56	1.15259	0.249079	0.402873	0.414241	0.382747
TBX6	0.728377	0.466383	1.03196	0.302092	1.24475	0.417003	0.37986
ZNF333	1.2046	0.228359	0.49585	0.62	1.2024	0.418359	0.378451
ZNF649	1.32684	0.184561	0.293683	0.769	1.14588	0.419033	0.377752
ZNF687	0.676062	0.499001	1.06958	0.284808	1.23436	0.419408	0.377364
TCF15	0.681321	0.495669	1.06199	0.288239	1.23271	0.420871	0.375851
ZNF217	0.982706	0.325752	0.772409	0.439872	1.24105	0.421685	0.375012
ZNF787	0.859061	0.390307	0.895559	0.370489	1.2407	0.424233	0.372395
TSC22D2	1.02563	0.305065	0.712124	0.476388	1.22878	0.425634	0.370964
ZNF524	1.0186	0.308395	0.71431	0.475036	1.22535	0.427884	0.368674
ZNF267	1.40623	0.159657	-0.102953	0.918	0.921554	0.428011	0.368545
SP5	1.02606	0.304864	0.698084	0.485124	1.21915	0.430564	0.365962
TP53	0.59776	0.55	1.10539	0.26899	1.20431	0.430655	0.365871
CTBP1	0.350451	0.726	1.26611	0.205473	1.14308	0.432998	0.363515
ZMAT3	1.31197	0.189529	0.266311	0.79	1.11602	0.434051	0.362459
IRF3	0.947769	0.343247	0.778498	0.436276	1.22066	0.434094	0.362416
AKNA	0.753463	0.451172	0.968025	0.333032	1.21728	0.435051	0.36146
ALX4	0.917046	0.359119	0.806311	0.420063	1.2186	0.436183	0.360331
IKZF3	0.840712	0.400509	0.878109	0.379884	1.21539	0.438626	0.357905
TCF7	0.810404	0.417708	0.903796	0.366104	1.21212	0.440087	0.356461
ZGLP1	1.16459	0.244184	0.481727	0.63	1.16412	0.441796	0.354778
SARNP	1.26356	0.206389	0.321278	0.748	1.12065	0.442812	0.353781
CEBPZ	1.12165	0.262013	0.537387	0.591	1.17311	0.443691	0.35292
HNF1A	0.844642	0.398311	0.852225	0.394089	1.19987	0.447632	0.349079
ZNF660	0.771079	0.44066	0.922216	0.356416	1.19734	0.447795	0.348921
ISL1	1.08259	0.278991	-0.57691	0.564	0.357569	0.448336	0.348396
HOXA11	1.01525	0.309985	0.660396	0.509	1.18486	0.449134	0.347624
ZNF26	0.975149	0.329486	0.704074	0.481387	1.18739	0.45066	0.346151
LBX1	1.02386	0.305899	0.644888	0.519	1.17999	0.450939	0.345882
ZNF775	0.850969	0.394786	0.821992	0.411082	1.18296	0.457392	0.339711
CNOT7	1.33003	0.183509	-0.13198	0.895	0.847147	0.460929	0.336366
ZFR	1.05304	0.292324	-0.569525	0.569	0.341894	0.464694	0.332833
T	1.03213	0.302012	0.593271	0.553	1.14933	0.465913	0.331695
ZNF446	0.965885	0.334102	0.671346	0.502	1.1577	0.467176	0.33052
ZNF700	1.37041	0.17056	0.0175473	0.986	0.981432	0.467984	0.329769
SP140	0.658838	0.51	0.969446	0.332323	1.15137	0.470319	0.327608
TSC22D4	0.603765	0.546	1.01182	0.311626	1.14239	0.471495	0.326523
ZNF697	1.28206	0.19982	0.182743	0.855	1.03577	0.47273	0.325387
TRIM25	0.0601954	0.952	1.33568	0.181653	0.987034	0.476407	0.322022
ZNF498	0.922551	0.356241	0.690952	0.489595	1.14092	0.478997	0.319667
ZBTB45	1.15495	0.248111	0.377234	0.706	1.08342	0.480309	0.318479
ZNF148	1.32043	0.186691	0.0752699	0.94	0.98691	0.480872	0.31797
ZNF24	1.08735	0.27688	0.467699	0.64	1.09959	0.483846	0.315293
IRF5	1.03657	0.299938	0.53594	0.592	1.11193	0.484468	0.314734
RAX	0.857594	0.391117	0.746423	0.455412	1.13421	0.485429	0.313875
TLX3	-0.510073	0.61	1.05322	0.292238	0.384065	0.485681	0.313649
ZNF236	0.665079	0.506	0.919889	0.357631	1.12074	0.490309	0.30953
ASCL2	0.810354	0.417737	0.78274	0.43378	1.12649	0.490728	0.30916
BARX1	0.85858	0.390572	0.725881	0.467912	1.12038	0.493364	0.306832
KLF13	1.28321	0.199418	0.0966555	0.923	0.975714	0.495585	0.304882
PAX1	0.796455	0.425768	0.783476	0.433348	1.11718	0.496334	0.304226
ZNF304	1.01455	0.31032	0.527279	0.598	1.09024	0.498132	0.302655
MYNN	1.15517	0.248022	-0.308108	0.758	0.598962	0.502208	0.299117
ELF2	0.828107	0.40761	-0.736058	0.461696	0.0650888	0.502527	0.29884
ZNF295	1.18797	0.234844	0.25076	0.802	1.01734	0.502782	0.29862
POU2F2	0.864721	0.387192	0.695752	0.486584	1.10342	0.502878	0.298538
GFI1	0.500107	0.617	1.02362	0.306017	1.07743	0.503563	0.297946
OLIG3	0.930943	0.351883	0.617356	0.537	1.09481	0.503811	0.297732
IKZF1	0.778315	0.436383	0.781499	0.434509	1.10295	0.504895	0.296799
GBX2	0.459326	0.646	1.04584	0.295637	1.06431	0.507166	0.29485
NKX2-3	0.806208	0.420123	0.738486	0.460219	1.09226	0.511071	0.291519
ZNF431	1.29321	0.195938	-0.0150403	0.988	0.903804	0.511462	0.291187
FOXI1	0.924008	0.355482	0.605269	0.545	1.08136	0.51171	0.290976
POU6F2	0.864422	0.387356	0.671346	0.502	1.08595	0.512882	0.289982
KDM1A	1.02372	0.305967	-0.473299	0.636	0.389208	0.513115	0.289786
ZNF843	0.698312	0.484982	0.838932	0.401508	1.08699	0.513326	0.289607
SP6	0.814052	0.415615	0.723595	0.469315	1.08728	0.513866	0.28915
POU2F3	0.827999	0.407671	0.706048	0.480158	1.08474	0.514996	0.288196
RB1	0.920397	0.357365	-0.599259	0.549	0.227079	0.515725	0.287582
TEAD4	0.782381	0.433991	0.750111	0.453188	1.08364	0.516516	0.286917
ZDHHC20	1.18267	0.236942	-0.212137	0.832	0.686267	0.517257	0.286294
MYOD1	0.776358	0.437538	0.752645	0.451664	1.08117	0.518043	0.285635
SOX8	0.775279	0.438175	0.753627	0.451073	1.0811	0.51809	0.285595
ZNF426	1.2155	0.224176	0.148434	0.882	0.964446	0.518211	0.285494
ZNF358	1.06408	0.287292	0.397498	0.691	1.03349	0.519499	0.284416
ZNF71	1.13661	0.255703	0.283231	0.777	1.00398	0.51976	0.284197
TBX5	0.782004	0.434212	0.740616	0.458926	1.07665	0.520714	0.283401
MZF1	-0.533049	0.594	0.959592	0.337261	0.301612	0.522423	0.281978
FOXI2	0.853975	0.393119	0.658838	0.51	1.06972	0.522677	0.281767
MRRF	0.684456	0.493687	0.829476	0.406835	1.07051	0.523253	0.281289
ZNF91	0.861975	0.388701	-0.635657	0.525	0.160031	0.528394	0.277042
RBPJ	0.983264	0.325478	0.474701	0.635	1.03094	0.532526	0.273659
SIN3A	0.97812	0.328015	0.48032	0.631	1.03127	0.532997	0.273275
CBFA2T3	0.67449	0.5	0.802719	0.422137	1.04454	0.539401	0.268088
JUND	1.19592	0.23173	-0.111777	0.911	0.766601	0.539459	0.268042
ZNF23	0.830293	0.406373	0.643345	0.52	1.04202	0.539783	0.267781
MECP2	0.646431	0.518	0.826831	0.408333	1.04175	0.540097	0.267528
MAFA	0.836361	0.402952	0.632592	0.527	1.03871	0.541399	0.266482
DMRTC2	0.732837	0.463658	0.740135	0.459218	1.04155	0.542273	0.265782
NEUROD6	1.00688	0.313991	0.412463	0.68	1.00363	0.543191	0.265047
BARX2	0.665079	0.506	0.800603	0.423362	1.03639	0.544281	0.264177
IRX1	0.755632	0.44987	0.711434	0.476816	1.03737	0.544719	0.263828
HOXC12	0.723809	0.469183	0.741576	0.458344	1.03618	0.545553	0.263163
ZNF672	1.04801	0.294635	0.339809	0.734	0.981335	0.547417	0.261682
ZFYVE26	0.832972	0.40486	0.620392	0.535	1.02768	0.547934	0.261272
GABPA	1.22199	0.221711	0.0275764	0.978	0.883578	0.54829	0.26099
ZNF341	0.780018	0.43538	0.67449	0.5	1.02849	0.549598	0.259955
ZNF654	1.1559	0.247724	-0.150969	0.88	0.71059	0.550066	0.259585
NR1I3	0.790865	0.429023	0.655727	0.512	1.02289	0.552593	0.257595
CREB3L3	0.621912	0.534	0.816175	0.4144	1.01688	0.555057	0.255663
NPAS1	0.672917	0.501	0.768858	0.441978	1.01949	0.55527	0.255496
GCM2	0.663516	0.507	0.773124	0.439449	1.01586	0.557331	0.253887
ZIC3	0.739624	0.459528	0.694836	0.487158	1.01432	0.558923	0.252648
ZBED3	1.12031	0.262583	-0.181468	0.856	0.66386	0.56028	0.251595
LMO1	1.17641	0.239432	0.0714998	0.943	0.882403	0.561791	0.250425
TAF4	0.192948	0.847	1.10997	0.267014	0.921298	0.562351	0.249992
ZIC2	0.731727	0.464335	0.691964	0.48896	1.0067	0.563658	0.248984
ZNF416	1.03828	0.299138	0.302855	0.762	0.948329	0.564993	0.247957
PAX2	0.61584	0.538	0.799316	0.424107	1.00067	0.565328	0.247699
ZKSCAN5	0.581357	0.561	0.828142	0.40759	0.996666	0.566049	0.247146
TGIF2	0.178921	0.858	1.11082	0.266648	0.911981	0.566235	0.247003
CREB3L4	0.644888	0.519	0.769366	0.441676	1.00003	0.566892	0.246499
NKRF	-0.144634	0.885	1.12825	0.259213	0.695524	0.567148	0.246303
SALL1	0.449598	0.653	0.931382	0.351656	0.976501	0.567483	0.246047
HNF4A	0.474701	0.635	0.911802	0.361873	0.980406	0.567716	0.245869
BARHL1	0.76033	0.447057	0.651072	0.515	0.998012	0.56837	0.245369
TLX1	0.587303	0.557	0.814114	0.41558	0.990951	0.570193	0.243978
GATA1	0.498687	0.618	0.887334	0.374899	0.980064	0.5705	0.243744
PHF5A	0.666643	0.505	0.740771	0.458832	0.995192	0.570533	0.24372
FOXF1	0.755223	0.450115	0.644888	0.519	0.990028	0.573302	0.241616
ZSCAN16	1.14068	0.254001	0.0953964	0.924	0.874041	0.574881	0.240422
ZBTB32	0.53594	0.592	0.846776	0.39712	0.977728	0.575457	0.239987
MEIS3	0.868959	0.384869	0.508647	0.611	0.974114	0.575545	0.239921
ZNF597	1.14037	0.254131	0.0928786	0.926	0.87204	0.575791	0.239735
TCEAL1	0.965253	0.334418	0.379926	0.704	0.951185	0.575943	0.239621
SIM2	0.521527	0.602	0.856274	0.391846	0.974252	0.576609	0.239118
ZNF703	0.614326	0.539	0.773049	0.439493	0.981022	0.578045	0.238039
FOXA2	0.605269	0.545	0.780828	0.434903	0.980119	0.57824	0.237892
ZNF513	0.873217	0.382545	0.493018	0.622	0.966074	0.579564	0.236899
HNF1B	0.569525	0.569	0.809287	0.41835	0.974967	0.579704	0.236793
ZBTB2	0.925528	0.354691	-0.420665	0.674	0.356992	0.581167	0.235699
KLF1	0.497268	0.619	0.863577	0.38782	0.962263	0.582594	0.234634
ZBTB11	1.15173	0.249434	0.0376083	0.97	0.840986	0.585284	0.232633
ZNF177	0.75932	0.447661	0.611301	0.541	0.969176	0.585616	0.232387
FOXE1	0.618873	0.536	0.750322	0.453061	0.968167	0.586545	0.231699
NR1I2	0.593271	0.553	0.772527	0.439802	0.965765	0.587068	0.231311
TRAFD1	0.628006	0.53	0.738515	0.460202	0.966276	0.588052	0.230584
ZNF778	1.07253	0.283483	-0.168741	0.866	0.639074	0.590289	0.228935
SNAPC5	1.0364	0.300015	0.228831	0.819	0.894655	0.590592	0.228712
ZBTB1	1.14352	0.252823	-0.0338459	0.973	0.784658	0.590991	0.228419
PAX7	0.484544	0.628	0.854905	0.392604	0.947133	0.591774	0.227844
TFCP2L1	0.614326	0.539	0.737287	0.460948	0.955735	0.594421	0.225906
NKX2-2	0.533049	0.594	0.808028	0.419074	0.948285	0.595088	0.225419
ZNF709	1.10182	0.270539	-0.0903614	0.928	0.71521	0.598041	0.223269
VSX1	0.570999	0.568	0.768421	0.442237	0.947113	0.598221	0.223138
ZNF134	1.04907	0.294146	-0.184017	0.854	0.611684	0.598235	0.223128
OVOL2	0.634124	0.526	0.709959	0.47773	0.95041	0.598353	0.223043
NKX6-2	0.530161	0.596	0.801976	0.422567	0.941964	0.599131	0.222478
EMX2	0.806972	0.419682	0.522963	0.601	0.940406	0.599654	0.222099
MESP1	0.599259	0.549	0.739059	0.459871	0.946334	0.599985	0.22186
ZNF580	0.476104	0.634	0.839541	0.401166	0.930302	0.602551	0.220006
PDX1	0.53594	0.592	0.789715	0.429694	0.93738	0.602606	0.219967
ZC3H15	0.782845	0.433718	-0.541737	0.588	0.17049	0.603491	0.219329
FOXG1	0.575431	0.565	0.752391	0.451816	0.938912	0.603832	0.219084
ISL2	0.559237	0.576	0.766449	0.443409	0.937402	0.604007	0.218958
DLX2	0.617356	0.537	0.710005	0.477701	0.938586	0.605535	0.21786
HOXA10	0.649524	0.516	0.678539	0.49743	0.939082	0.605737	0.217716
MAEL	0.764894	0.444335	0.551925	0.581	0.931131	0.607752	0.216274
GATA5	0.537387	0.591	0.776716	0.437327	0.929211	0.60816	0.215982
ZCCHC8	1.05545	0.291219	0.133245	0.894	0.840535	0.61071	0.214165
MLXIPL	0.501527	0.616	0.800125	0.423638	0.920408	0.611532	0.213581
GSX2	0.575431	0.565	0.729976	0.465405	0.923062	0.614201	0.211689
ZNF696	0.734675	0.462538	0.569525	0.569	0.922208	0.614509	0.211472
ZBTB7A	0.192948	0.847	1.01309	0.311016	0.852799	0.614838	0.21124
SMAD3	0.48032	0.631	0.809145	0.418432	0.911789	0.615637	0.210675
SOX1	0.590284	0.555	0.707478	0.479269	0.917657	0.618246	0.208839
ZNF678	0.72599	0.467845	0.569525	0.569	0.916067	0.618523	0.208644
ZNF575	0.706048	0.480158	0.590284	0.555	0.916645	0.618899	0.208381
TFIP11	1.10844	0.267673	-0.00501328	0.996	0.780238	0.61905	0.208274
SPZ1	0.952429	0.34088	0.272809	0.785	0.866374	0.620354	0.20736
FOXA1	0.581357	0.561	0.708016	0.478935	0.911724	0.621792	0.206355
ADNP	0.994404	0.320026	0.201893	0.84	0.84591	0.621975	0.206227
ZNF683	0.602262	0.547	0.687925	0.4915	0.912299	0.622013	0.206201
PITX3	0.587303	0.557	0.699159	0.484452	0.909666	0.62331	0.205296
SOX9	0.554846	0.579	0.727806	0.466732	0.906972	0.623831	0.204933
BARHL2	0.547551	0.584	0.732892	0.463624	0.90541	0.62451	0.204461
TP73	0.547551	0.584	0.731163	0.464679	0.904188	0.625314	0.203902
ZFP161	0.926049	0.354421	-0.297611	0.766	0.444373	0.625462	0.203799
GRHL3	0.591777	0.554	0.689749	0.490352	0.906176	0.625682	0.203646
TEAD1	1.09267	0.274538	0.00501328	0.996	0.77618	0.628002	0.202039
FOXL2	0.537387	0.591	0.723054	0.469647	0.891267	0.633315	0.19838
VPS72	0.986173	0.324048	-0.180194	0.857	0.569913	0.633505	0.19825
VAV1	0.766518	0.443368	0.483135	0.629	0.883638	0.635	0.197226
TBX10	0.53594	0.592	0.717108	0.473307	0.886039	0.636682	0.196077
ESRRB	0.725908	0.467895	0.525839	0.599	0.885119	0.636773	0.196016
VENTX	0.498687	0.618	0.748768	0.453997	0.882084	0.637156	0.195754
ZMAT1	0.408373	0.683	0.819577	0.412457	0.868292	0.6386	0.194771
TRIM27	1.05126	0.293139	-0.047644	0.962	0.709663	0.638969	0.19452
GFI1B	0.291067	0.771	0.904021	0.365984	0.845055	0.639189	0.194371
DLX4	0.497268	0.619	0.745628	0.455892	0.87886	0.639219	0.19435
UTF1	0.647977	0.517	0.603765	0.546	0.885115	0.639326	0.194278
PRDM13	0.556308	0.578	0.692815	0.488426	0.883264	0.639362	0.194254
ZC3H12A	0.599259	0.549	0.647977	0.517	0.881929	0.641284	0.19295
NFYC	0.754169	0.450748	0.478914	0.632	0.871921	0.642591	0.192065
ELF4	0.821972	0.411093	0.392079	0.695	0.858464	0.643641	0.191357
FUBP3	-0.412463	0.68	0.793182	0.427672	0.269209	0.649993	0.187091
ZNF579	0.0426256	0.966	1.03147	0.302319	0.759502	0.651502	0.186084
ZNF585B	0.987629	0.323334	0.12061	0.904	0.783643	0.651815	0.185876
FOXL1	0.537387	0.591	0.681884	0.495312	0.862155	0.65235	0.18552
ZNF541	-0.28976	0.772	0.878906	0.379452	0.416589	0.652605	0.18535
MORC4	0.884136	0.376623	-0.281926	0.778	0.425827	0.652697	0.185288
ZNF28	1.04084	0.29795	-0.0137869	0.989	0.726236	0.65473	0.183938
NKX2-1	0.611301	0.541	0.605269	0.545	0.860246	0.654941	0.183798
AIRE	0.345126	0.73	0.834674	0.403901	0.834244	0.654944	0.183796
HIC1	0.646431	0.518	0.568051	0.57	0.858769	0.655447	0.183462
PAX9	0.333178	0.739	0.839597	0.401135	0.829277	0.656883	0.182512
DLX1	0.593271	0.553	0.617356	0.537	0.856042	0.657518	0.182093
OTX1	0.515792	0.606	0.687595	0.491708	0.850923	0.658747	0.181281
TFAP2E	0.40293	0.687	0.782182	0.434108	0.838001	0.659058	0.181076
FOXD2	0.549008	0.583	0.652622	0.514	0.849681	0.660785	0.17994
FOXN1	0.455152	0.649	0.734849	0.462432	0.841457	0.661334	0.179579
FERD3L	0.321278	0.748	0.839237	0.401336	0.820608	0.661432	0.179515
XBP1	1.02651	0.304653	0.0175473	0.986	0.738258	0.661658	0.179366
ZNF670	0.767462	0.442807	-0.413828	0.679	0.250057	0.661993	0.179147
IRX6	0.606775	0.544	0.593271	0.553	0.848561	0.662192	0.179016
SP8	0.793551	0.427457	0.377234	0.706	0.82787	0.663335	0.178267
GSC2	0.438533	0.661	0.742657	0.457689	0.835227	0.664231	0.177681
DLX3	0.563639	0.573	0.629533	0.529	0.8437	0.664928	0.177225
ARX	0.466301	0.641	0.717196	0.473253	0.836859	0.665213	0.177039
GRHL2	0.570999	0.568	0.618873	0.536	0.841367	0.666514	0.176191
ZNF425	0.162388	0.871	0.934915	0.349832	0.775911	0.666818	0.175992
ZNF558	0.972122	0.33099	-0.0903614	0.928	0.623499	0.669726	0.174103
LASS6	0.606775	0.544	-0.573952	0.566	0.0232093	0.670605	0.173533
ELF5	0.59776	0.55	0.582842	0.56	0.834811	0.670718	0.17346
TCF12	0.74136	0.458475	-0.423405	0.672	0.224828	0.67083	0.173387
ZNF746	0.582842	0.56	0.596262	0.551	0.833752	0.671377	0.173034
ZNF74	0.702555	0.482333	0.467699	0.64	0.827494	0.671534	0.172932
SMAD5	0.736109	0.461664	-0.427521	0.669	0.218205	0.671722	0.172811
ZC3H3	-0.0564291	0.955	0.986356	0.323958	0.657558	0.67234	0.172411
SMAD4	1.01088	0.312074	0.00751996	0.994	0.720118	0.673302	0.17179
SRF	-0.296301	0.767	0.83289	0.404907	0.379425	0.673726	0.171517
RFX4	0.729064	0.465962	0.430269	0.667	0.819773	0.673999	0.171341
SIM1	0.591777	0.554	0.579873	0.562	0.828482	0.674643	0.170926
SIX5	0.488776	0.625	0.673746	0.500473	0.822028	0.676328	0.169843
RC3H2	0.802155	0.422464	-0.330529	0.741	0.333489	0.676619	0.169656
FOXO4	0.769214	0.441766	0.36783	0.713	0.804011	0.678859	0.168221
MNX1	0.504372	0.614	0.654174	0.513	0.819215	0.678862	0.168219
ZSCAN21	0.760376	0.44703	0.375888	0.707	0.80346	0.680094	0.167431
SLC30A9	0.817563	0.413607	-0.298921	0.765	0.366735	0.680507	0.167167
CRX	0.510073	0.61	0.644888	0.519	0.816681	0.680715	0.167035
ZNF777	0.675326	0.499468	0.476104	0.634	0.814184	0.680799	0.166981
FOXH1	0.43302	0.665	0.706617	0.479805	0.805845	0.683558	0.165225
HMGA2	0.441294	0.659	0.69462	0.487293	0.803213	0.6859	0.163739
HLTF	0.942767	0.3458	0.0891031	0.929	0.729642	0.686039	0.163651
SPDEF	0.437154	0.662	0.697842	0.485276	0.802563	0.686044	0.163648
DMRT1	0.305481	0.76	0.801697	0.422728	0.782893	0.686067	0.163633
ZNF500	0.129452	0.897	0.91622	0.359552	0.739402	0.687478	0.162741
ZNF821	0.805477	0.420545	-0.288453	0.773	0.365591	0.690368	0.160919
IRX5	0.572475	0.567	0.551925	0.581	0.795071	0.695223	0.157876
FOXA3	0.357123	0.721	0.743724	0.457043	0.778416	0.695335	0.157806
OLIG1	0.435775	0.663	0.67449	0.5	0.785076	0.697518	0.156444
DMBX1	0.431644	0.666	0.673339	0.500731	0.781341	0.699706	0.155084
ZDHHC6	0.594766	0.552	-0.511501	0.609	0.0588768	0.70264	0.153267
DMRTB1	0.434397	0.664	0.663516	0.507	0.776342	0.703163	0.152944
TFDP3	0.346456	0.729	0.734675	0.462537	0.764475	0.703752	0.15258
NR2E3	0.149702	0.881	0.872665	0.382846	0.722922	0.703858	0.152515
MLL4	-0.253347	0.8	0.801415	0.422891	0.387543	0.704971	0.151829
EMX1	0.521527	0.602	0.579873	0.562	0.778807	0.704983	0.151821
EHF	0.661955	0.508	0.426148	0.67	0.769405	0.707183	0.150468
VSX2	0.477509	0.633	0.61584	0.538	0.773114	0.707392	0.15034
FOXE3	0.623433	0.533	0.466301	0.641	0.770558	0.708575	0.149614
LMX1A	0.442676	0.658	0.641805	0.521	0.766844	0.709824	0.148849
NKX6-3	0.349119	0.727	0.718644	0.47236	0.755023	0.710452	0.148465
MTF2	0.628006	0.53	-0.456542	0.648	0.121243	0.710489	0.148443
SPIC	0.669777	0.503	-0.408373	0.683	0.184841	0.710606	0.148371
TBPL2	0.459326	0.646	0.623433	0.533	0.765626	0.711426	0.14787
GLI1	0.434397	0.664	0.643345	0.52	0.762079	0.712451	0.147245
ELF3	0.441294	0.659	0.635657	0.525	0.76152	0.713189	0.146795
CREB3	0.658838	0.51	-0.413828	0.679	0.173248	0.713523	0.146592
EN2	0.217267	0.828	0.808945	0.418547	0.725642	0.713806	0.14642
ZNF585A	0.524401	0.6	0.554846	0.579	0.763143	0.714699	0.145877
ZGPAT	0.407011	0.684	0.660396	0.509	0.75477	0.715497	0.145392
ZNF417	0.755011	0.450243	0.284536	0.776	0.73507	0.716795	0.144605
NKX2-5	0.329206	0.742	0.71952	0.471821	0.741561	0.717533	0.144158
LHX6	0.820256	0.41207	0.189118	0.85	0.713735	0.71771	0.144051
FOXJ1	0.331853	0.74	0.715622	0.474225	0.740677	0.718409	0.143628
RBPJL	0.291067	0.771	0.745251	0.45612	0.732788	0.719185	0.143159
GATA4	-0.0928786	0.926	0.875133	0.381502	0.553137	0.720856	0.142152
RAX2	0.459326	0.646	0.60076	0.548	0.749594	0.721623	0.14169
ZNF395	0.476104	0.634	0.584327	0.559	0.749839	0.722036	0.141441
ZNF35	0.789859	0.42961	0.217267	0.828	0.712146	0.723393	0.140626
DMRTA1	0.272809	0.785	0.74826	0.454303	0.722005	0.724334	0.140061
CDX2	0.191671	0.848	0.80411	0.421334	0.704123	0.725016	0.139652
ZCRB1	0.723016	0.46967	-0.304168	0.761	0.29617	0.725148	0.139573
FOXR1	0.579873	0.562	0.470497	0.638	0.742724	0.726316	0.138874
KLF14	0.487365	0.626	0.56217	0.574	0.742133	0.727103	0.138404
ZNF138	0.823077	0.410464	-0.154773	0.877	0.472562	0.727771	0.138005
NFATC4	0.318639	0.75	0.699449	0.484272	0.719897	0.731053	0.136051
PLAG1	0.501527	0.616	0.538836	0.59	0.735648	0.731293	0.135909
ZDHHC19	0.0953964	0.924	0.850203	0.395212	0.668639	0.733046	0.134869
GLI2	0.431644	0.666	0.599259	0.549	0.728959	0.733507	0.134596
HIRA	0.623433	0.533	0.401571	0.688	0.724787	0.734582	0.13396
OVOL1	0.471897	0.637	0.559237	0.576	0.729122	0.73479	0.133837
ZNF383	0.669777	0.503	-0.342466	0.732	0.231444	0.736075	0.133078
TBR1	-0.0501536	0.96	0.870221	0.38418	0.579875	0.736691	0.132715
NKX3-2	0.298921	0.765	0.700079	0.483878	0.7064	0.738039	0.131921
SATB2	0.652622	0.514	0.353118	0.724	0.711166	0.739991	0.130774
ZNF593	0.856483	0.39173	-0.0627068	0.95	0.561285	0.739999	0.130769
GCM1	0.744801	0.456392	0.230118	0.818	0.689372	0.741168	0.130083
VAX1	0.153505	0.878	0.791086	0.428894	0.667927	0.744346	0.128225
MYF6	0.575431	0.565	0.427521	0.669	0.709194	0.745727	0.12742
PAX6	0.533049	0.594	0.471897	0.637	0.710604	0.746109	0.127198
ZSCAN18	0.547551	0.584	0.456542	0.648	0.710001	0.746162	0.127167
PHF21A	-0.0438801	0.965	0.855421	0.392318	0.573846	0.746312	0.127079
SNAPC2	0.412463	0.68	0.587303	0.557	0.706942	0.74648	0.126982
SP1	0.599259	0.549	-0.398855	0.69	0.141707	0.746529	0.126954
NHLH1	0.249466	0.803	0.718426	0.472494	0.684404	0.747114	0.126613
NR2E1	0.557772	0.577	0.442676	0.658	0.707424	0.747359	0.126471
HKR1	0.118085	0.906	0.80616	0.42015	0.65354	0.748316	0.125915
PATZ1	0.712977	0.47586	-0.253347	0.8	0.325007	0.748347	0.125897
HDX	0.624956	0.532	-0.362471	0.717	0.185605	0.749076	0.125474
ONECUT2	0.697151	0.485709	-0.268909	0.788	0.302813	0.750322	0.124753
PRDM14	0.365149	0.715	0.618873	0.536	0.695809	0.750803	0.124474
POU4F1	0.316003	0.752	0.658838	0.51	0.689317	0.751072	0.124319
MAX	0.287147	0.774	0.675517	0.499348	0.680706	0.753911	0.12268
ZNF691	0.794621	0.426834	-0.118085	0.906	0.478383	0.754117	0.122561
NKX2-8	0.40293	0.687	0.57691	0.564	0.692852	0.754835	0.122148
WT1	0.393433	0.694	0.584327	0.559	0.691381	0.755288	0.121888
ZNF264	0.807329	0.419477	-0.0941374	0.925	0.504303	0.755354	0.121849
ZNF212	0.292375	0.77	0.668209	0.504	0.679236	0.755415	0.121815
PROP1	0.226259	0.821	0.718003	0.472755	0.667694	0.755464	0.121786
NR1H2	0.634124	0.526	-0.330529	0.741	0.214674	0.757007	0.1209
HR	0.271508	0.786	0.680706	0.496058	0.673317	0.757134	0.120827
PTF1A	0.0162938	0.987	0.848068	0.3964	0.611196	0.758399	0.120102
ZNF490	0.614326	0.539	-0.346456	0.729	0.189413	0.759976	0.1192
ZFP42	0.142101	0.887	0.765302	0.444092	0.641631	0.760889	0.118679
TBX21	-0.0263226	0.979	0.837304	0.402422	0.57345	0.760946	0.118646
PITX1	0.459326	0.646	0.507221	0.612	0.683452	0.76223	0.117914
NPAS4	0.0576844	0.954	0.814714	0.415236	0.616879	0.762956	0.1175
CDX1	-0.0639626	0.949	0.807596	0.419323	0.525828	0.764621	0.116554
ZNF669	0.223688	0.823	0.700296	0.483743	0.653355	0.764789	0.116458
LHX3	0.143367	0.886	0.750801	0.452772	0.632273	0.767574	0.11488
PURB	-0.09162	0.927	0.783652	0.433245	0.48934	0.767995	0.114641
ZNF140	0.748082	0.454411	-0.142101	0.887	0.428493	0.769311	0.113898
MIER2	0.393433	0.694	0.544642	0.586	0.663319	0.772585	0.112054
ZMYND15	0.267609	0.789	0.649524	0.516	0.648511	0.772981	0.111831
HOXA1	0.235269	0.814	0.671346	0.502	0.641074	0.77433	0.111074
ZNF330	0.37858	0.705	0.553385	0.58	0.658998	0.774573	0.110938
NR2F1	0.800641	0.423339	-0.0388625	0.969	0.538659	0.775748	0.11028
TFAP2D	0.773835	0.439028	0.0815557	0.935	0.604853	0.775993	0.110142
POU3F3	-0.125661	0.9	0.74488	0.456344	0.437854	0.776187	0.110033
DUXA	0.541737	0.588	0.383971	0.701	0.654574	0.7775	0.109299
CEBPA	0.569525	0.569	0.351784	0.725	0.651464	0.777799	0.109133
POU3F1	0.284536	0.776	0.621912	0.534	0.640955	0.779441	0.108217
ZNF468	0.510073	0.61	-0.409735	0.682	0.0709497	0.780879	0.107416
SOX21	0.212137	0.832	0.672917	0.501	0.625828	0.78159	0.107021
ZNF41	0.129452	0.897	0.726108	0.467773	0.604972	0.783996	0.105686
POU2F1	0.12061	0.904	0.731748	0.464323	0.602708	0.784131	0.105611
E2F5	0.794799	0.42673	0.0150403	0.988	0.572643	0.785744	0.104719
ETV7	-0.280622	0.779	0.608283	0.543	0.231691	0.786939	0.104059
ZSCAN30	-0.133245	0.894	0.710824	0.477193	0.40841	0.790033	0.102355
ZNF213	-0.345126	0.73	0.546096	0.585	0.142108	0.790407	0.102149
GTF2H3	0.720036	0.471503	0.115562	0.908	0.590857	0.79132	0.101648
CUX1	0.397498	0.691	0.49585	0.62	0.631693	0.791571	0.10151
GSX1	-0.388022	0.698	0.502949	0.615	0.081266	0.79229	0.101116
TEF	0.654174	0.513	0.205732	0.837	0.608045	0.792384	0.101064
HOXA13	0.191671	0.848	0.663516	0.507	0.604709	0.792853	0.100807
LHX4	0.407011	0.684	0.483135	0.629	0.629428	0.793106	0.100669
FOXF2	0.326561	0.744	0.554846	0.579	0.623249	0.793561	0.100419
BCL3	0.423405	0.672	0.464904	0.642	0.628129	0.794107	0.100121
ZDHHC15	-0.339809	0.734	0.534494	0.593	0.137663	0.797316	0.0983695
STAT4	0.359796	0.719	0.51436	0.607	0.618122	0.798289	0.0978401
ZNF224	0.661955	0.508	-0.172557	0.863	0.346057	0.799918	0.0969544
OLIG2	0.163658	0.87	0.666643	0.505	0.587112	0.800697	0.0965316
ZBBX	0.502949	0.615	0.361133	0.718	0.610998	0.802518	0.0955454
RORC	0.235269	0.814	0.602262	0.547	0.592224	0.805517	0.0939254
LASS2	0.491603	0.623	-0.36381	0.716	0.0903634	0.806172	0.0935726
SOX3	0.337155	0.736	0.508647	0.611	0.598072	0.809086	0.0920055
IRX4	0.26112	0.794	0.572475	0.567	0.589441	0.809487	0.0917904
MKX	0.345126	0.73	0.500107	0.617	0.597669	0.809656	0.0916996
ZBTB34	0.695318	0.486856	-0.0891031	0.929	0.428659	0.81115	0.0908986
ZFYVE28	0.0225616	0.982	0.737294	0.460944	0.537299	0.811434	0.0907467
FOXQ1	0.209574	0.834	0.605269	0.545	0.576181	0.812923	0.0899506
LASS3	0.450985	0.652	0.388022	0.698	0.593268	0.813369	0.0897124
HOXD11	-0.0740131	0.941	0.699919	0.483978	0.442582	0.813626	0.0895749
HES7	0.210856	0.833	0.59776	0.55	0.571778	0.815763	0.088436
ZCCHC4	0.652622	0.514	0.126925	0.899	0.551223	0.818818	0.0868124
STAT1	0.51436	0.607	0.301544	0.763	0.576931	0.819632	0.0863813
PITX2	0.354452	0.723	0.464904	0.642	0.579373	0.820419	0.0859641
LHX8	0.581357	0.561	0.217267	0.828	0.564713	0.820682	0.0858252
IRF8	0.494434	0.621	0.319958	0.749	0.575862	0.821158	0.0855735
SMAD6	-0.280622	0.779	0.524401	0.6	0.172377	0.82289	0.084658
TAF6	-0.237847	0.812	0.559237	0.576	0.227257	0.823128	0.0845329
GSC	-0.047644	0.962	0.695668	0.486637	0.458222	0.823456	0.0843595
EGR4	-0.0891031	0.929	0.666643	0.505	0.408383	0.824214	0.0839599
RFX2	-0.0125335	0.99	0.709179	0.478213	0.492603	0.827439	0.0822641
ZNF770	0.493018	0.622	-0.300232	0.764	0.13632	0.828764	0.0815691
SOHLH2	0.534494	0.593	0.248174	0.804	0.553429	0.829925	0.0809611
LEF1	0.287147	0.774	0.501527	0.616	0.557677	0.829934	0.0809565
PEG3	0.599259	0.549	0.163658	0.87	0.539464	0.83056	0.0806291
IFT57	0.569525	0.569	0.201893	0.84	0.545475	0.830804	0.0805016
SALL2	0.455152	0.649	0.334503	0.738	0.55837	0.831542	0.0801157
ZNF189	0.585815	0.558	-0.173829	0.862	0.291318	0.833035	0.0793366
GRLF1	0.673955	0.50034	-0.0451346	0.964	0.444643	0.834008	0.0788298
ZNF782	0.581357	0.561	-0.173829	0.862	0.288166	0.834921	0.0783546
ZNF282	0.284536	0.776	0.490189	0.624	0.547813	0.835387	0.0781123
ZSCAN10	-0.00501328	0.996	0.683533	0.49427	0.479786	0.841172	0.0751153
IRF1	0.379926	0.704	0.38532	0.7	0.541111	0.841531	0.07493
ZNF610	0.0941374	0.925	0.623433	0.533	0.507399	0.84169	0.0748478
KDM5A	0.476104	0.634	-0.281926	0.778	0.137305	0.84185	0.074765
NEUROG2	0.163658	0.87	0.572475	0.567	0.520525	0.841877	0.0747512
STAT5A	0.0325919	0.974	0.663516	0.507	0.492223	0.84225	0.0745589
BRPF1	0.144634	0.885	0.585815	0.558	0.516505	0.842259	0.0745545
ZNF517	0.316003	0.752	0.439913	0.66	0.534514	0.844009	0.0736528
NFXL1	0.392079	0.695	0.361133	0.718	0.532601	0.845886	0.072688
ZNF761	0.518657	0.604	0.215984	0.829	0.51947	0.847069	0.072081
ZBTB43	0.563639	0.573	-0.157311	0.875	0.287317	0.847525	0.0718476
ZNF57	0.669777	0.503	0.00375995	0.997	0.476262	0.847605	0.0718066
ZNF394	0.569525	0.569	-0.148434	0.882	0.297756	0.847858	0.0716769
TFE3	-0.13957	0.889	0.575431	0.565	0.3082	0.848152	0.0715262
ZNF720	0.544642	0.586	0.177647	0.859	0.510735	0.848901	0.071143
ATF6	0.553385	0.58	-0.164929	0.869	0.27468	0.849344	0.0709164
SPI1	0.59776	0.55	0.104213	0.917	0.49637	0.84957	0.0708009
MXD4	0.375888	0.707	-0.362471	0.717	0.00948732	0.851322	0.0699062
POU3F4	0.300232	0.764	0.424776	0.671	0.512658	0.855179	0.0679429
MSX1	0.0777838	0.938	0.599259	0.549	0.478742	0.856723	0.0671597
LBX2	0.0966555	0.923	0.584327	0.559	0.481528	0.857382	0.0668255
ZSCAN2	0.49585	0.62	0.204452	0.838	0.495189	0.859754	0.0656259
ZCCHC2	-0.25076	0.802	0.456542	0.648	0.14551	0.859843	0.0655809
MEOX2	0.485954	0.627	-0.214702	0.83	0.191804	0.86031	0.0653452
ZNF235	0.501527	0.616	-0.191671	0.848	0.219102	0.861585	0.0647019
SIX3	-0.0953964	0.924	0.570999	0.568	0.336302	0.863179	0.0638991
SLC26A3	0.510073	0.61	0.172557	0.863	0.482692	0.864207	0.0633823
PRDM16	0.150969	0.88	0.525839	0.599	0.478576	0.864649	0.0631601
ZNF828	0.460719	0.645	-0.227545	0.82	0.164879	0.865786	0.0625895
MYOG	0.200615	0.841	0.481727	0.63	0.482488	0.866378	0.0622928
ZSWIM3	0.407011	0.684	-0.284536	0.776	0.0866031	0.866983	0.0619896
PHTF2	0.521527	0.602	-0.144634	0.885	0.266503	0.868237	0.0613618
IRX2	-0.0488987	0.961	0.587303	0.557	0.38071	0.86981	0.0605758
TRIM29	-0.201893	0.84	0.467699	0.64	0.187953	0.871256	0.0598541
PAX3	0.156042	0.876	0.501527	0.616	0.464972	0.872504	0.0592327
ETV3L	0.161119	0.872	0.490189	0.624	0.460544	0.875268	0.0578588
ZNF616	0.533049	0.594	-0.102953	0.918	0.304123	0.875976	0.057508
LITAF	0.588793	0.556	-0.021308	0.983	0.401273	0.876736	0.0571313
SREBF2	0.362471	0.717	-0.298921	0.765	0.0449364	0.877915	0.0565478
ZDHHC7	0.413828	0.679	0.243007	0.808	0.464453	0.877991	0.05651
NR5A1	0.0263226	0.979	0.581357	0.561	0.429694	0.878343	0.0563359
ZNF234	0.540286	0.589	-0.0828133	0.934	0.323482	0.878886	0.0560676
RBAK	0.51436	0.607	-0.110516	0.912	0.285561	0.880941	0.055053
EDF1	0.505796	0.613	0.119348	0.905	0.442043	0.881638	0.0547095
ZNF619	-0.316003	0.752	0.333178	0.739	0.0121443	0.882205	0.0544305
HOXB9	-0.213419	0.831	0.419296	0.675	0.145577	0.885234	0.052942
KLF17	0.134509	0.893	0.478914	0.632	0.433755	0.887219	0.0519694
MSL3	-0.00626661	0.995	0.570999	0.568	0.399326	0.887667	0.0517502
ZDHHC1	-0.119348	0.905	0.488776	0.625	0.261226	0.887932	0.0516204
NFE2L1	-0.144634	0.885	0.463508	0.643	0.225478	0.889876	0.0506706
FOXP2	0.568051	0.57	0.00125331	0.999	0.402559	0.890087	0.0505675
ZNF75D	-0.0903614	0.928	0.498687	0.618	0.28873	0.892367	0.0494566
FOXC2	0.321278	0.748	0.294992	0.768	0.435768	0.8929	0.0491973
CTBP2	0.301544	0.763	0.312053	0.755	0.433879	0.893785	0.048767
VDR	0.522963	0.601	0.0514085	0.959	0.406142	0.893947	0.0486882
HCLS1	0.271508	0.786	0.335829	0.737	0.429452	0.89555	0.0479101
HIC2	0.435775	0.663	-0.1459	0.884	0.204972	0.899228	0.04613
ETV3	0.388022	0.698	0.198058	0.843	0.414421	0.900464	0.0455335
PHOX2B	0.445443	0.656	0.116823	0.907	0.397582	0.903916	0.0438718
DMRT2	0.0815557	0.935	0.459326	0.646	0.382461	0.90853	0.0416605
NEUROD2	0.138304	0.89	0.411099	0.681	0.388487	0.909575	0.0411612
HNF4G	0.302855	0.762	0.258527	0.796	0.396958	0.909807	0.0410509
ZBED2	0.100434	0.92	0.439913	0.66	0.382083	0.91013	0.0408964
NFKB2	0.0627068	0.95	0.464904	0.642	0.373077	0.911471	0.040257
ZNF397	0.419296	0.675	0.1143	0.909	0.377309	0.913277	0.0393973
ATOH8	0.210856	0.833	0.326561	0.744	0.380011	0.916264	0.0379796
ZNF786	-0.00375995	0.997	0.490189	0.624	0.343957	0.917396	0.0374432
RFX6	0.460719	0.645	0.0438801	0.965	0.356806	0.917537	0.0373766
GZF1	0.354452	0.723	0.173829	0.862	0.373551	0.917916	0.0371971
ZNF804B	0.446827	0.655	0.0589399	0.953	0.357631	0.918383	0.0369762
ERF	0.314686	0.753	0.215984	0.829	0.375241	0.918393	0.0369713
HOPX	-0.157311	0.875	0.365149	0.715	0.146964	0.919046	0.0366629
ZNF167	-0.215984	0.829	0.308108	0.758	0.0651414	0.920333	0.0360552
FLI1	0.374543	0.708	-0.138304	0.89	0.167046	0.921138	0.0356754
ZNF793	0.172557	0.863	0.343796	0.731	0.365116	0.921476	0.035516
ZNF2	-0.218551	0.827	0.300232	0.764	0.0577575	0.921924	0.0353047
SIX6	0.00250663	0.998	0.476104	0.634	0.338429	0.922339	0.0351096
AR	-0.0865867	0.931	0.411099	0.681	0.229465	0.922923	0.0348346
ZNF506	0.0878448	0.93	0.408373	0.683	0.350879	0.923459	0.0345824
HAND2	0.223688	0.823	0.287147	0.774	0.361215	0.924279	0.034197
LZTFL1	0.263714	0.792	0.235269	0.814	0.352835	0.927699	0.032593
MORC1	0.415194	0.678	0.0564291	0.955	0.333488	0.928923	0.0320204
HHEX	0.205732	0.837	0.284536	0.776	0.346672	0.929798	0.0316112
ZNHIT1	0.244298	0.807	-0.243007	0.808	0.000912927	0.930891	0.031101
THOC1	0.134509	0.893	0.343796	0.731	0.338213	0.931202	0.0309562
ZNF493	0.444059	0.657	-0.00626661	0.995	0.309566	0.931599	0.0307711
PHF20	0.292375	0.77	-0.189118	0.85	0.0730134	0.931932	0.0306158
ZNF479	0.381274	0.703	0.0664746	0.947	0.316606	0.936601	0.0284455
ZSWIM2	0.353118	0.724	0.100434	0.92	0.320709	0.936739	0.0283816
TRIM22	0.355787	0.722	0.0941374	0.925	0.318145	0.937455	0.0280493
SOX18	-0.0815557	0.935	0.365149	0.715	0.200531	0.937728	0.0279233
ARID3A	-0.154773	0.877	0.298921	0.765	0.101928	0.938682	0.0274816
ZNF461	0.278016	0.781	-0.176374	0.86	0.0718717	0.938983	0.0273424
PML	-0.061451	0.951	0.366489	0.714	0.215695	0.94187	0.0260093
ST18	0.300232	0.764	-0.138304	0.89	0.1145	0.942235	0.0258407
MYF5	0.26112	0.794	0.178921	0.858	0.311156	0.942732	0.0256117
ZNF385B	0.104213	0.917	0.327883	0.743	0.305538	0.942763	0.0255977
FBXW7	0.323918	0.746	0.107995	0.914	0.305408	0.942959	0.0255071
KLF2	0.0802983	0.936	0.342466	0.732	0.29894	0.944218	0.0249277
ZFP41	-0.135774	0.892	0.287147	0.774	0.107037	0.946185	0.0240238
ZNF444	-0.0288302	0.977	0.369171	0.712	0.240658	0.948098	0.0231468
RCAN1	0.355787	0.722	-0.0426256	0.966	0.221439	0.948759	0.0228441
E2F6	0.317321	0.751	0.0853288	0.932	0.284716	0.949648	0.0224372
RNF6	0.272809	0.785	-0.135774	0.892	0.0968985	0.949751	0.0223903
ETS1	0.186567	0.852	0.219835	0.826	0.287369	0.951001	0.0218192
FOXC1	0.0991741	0.921	0.288453	0.773	0.274094	0.953828	0.0205301
ZNF655	0.350451	0.726	-0.021308	0.983	0.23274	0.954412	0.0202643
TAL1	0.0250689	0.98	0.345126	0.73	0.261767	0.954997	0.019998
ZNF449	0.0853288	0.932	0.278016	0.781	0.256924	0.959072	0.0181486
POU1F1	0.321278	0.748	0.0162938	0.987	0.238699	0.962297	0.016691
ZNF707	-0.116823	0.907	0.226259	0.821	0.0773826	0.964202	0.0158318
HOXA3	-0.0225616	0.982	0.304168	0.761	0.199126	0.964981	0.0154814
SOX7	0.279319	0.78	0.0413712	0.967	0.226762	0.966975	0.0145848
ESR1	0.0263226	0.979	0.263714	0.792	0.205087	0.972635	0.01205
PRDM4	0.187843	0.851	0.101693	0.919	0.204733	0.974311	0.0113023
ZNF573	0.231405	0.817	-0.047644	0.962	0.129939	0.975257	0.0108811
RARG	0.195502	0.845	0.0853288	0.932	0.198577	0.975637	0.0107118
ZDHHC3	0.25076	0.802	-0.00751996	0.994	0.171996	0.977882	0.00971336
ZMAT2	0.079041	0.937	0.185292	0.853	0.186912	0.97835	0.00950593
ZDHHC16	0.166199	0.868	0.0991741	0.921	0.187647	0.978387	0.00948933
RUNX2	0.168741	0.866	-0.0815557	0.935	0.0616496	0.980623	0.00849798
TADA3	0.217267	0.828	0.0275764	0.978	0.173131	0.980638	0.00849106
ZNFX1	0.0627068	0.95	0.140835	0.888	0.143926	0.987077	0.00564905
GTF2H4	0.159849	0.873	-0.0200544	0.984	0.0988498	0.989561	0.00455737
ELK4	0.106734	0.915	0.0576844	0.954	0.116261	0.991558	0.00368171
HOXA9	-0.0714998	0.943	0.0802983	0.936	0.0062215	0.992828	0.00312603
ZNHIT3	0.079041	0.937	-0.0664746	0.947	0.00888582	0.993401	0.0028754
ZNF710	0.068987	0.945	0.0727564	0.942	0.100228	0.993737	0.00272844
PAX4	0.0639626	0.949	-0.0601954	0.952	0.00266381	0.995181	0.00209786
MEOX1	0.101693	0.919	-0.00501328	0.996	0.0683632	0.996309	0.00160582
SP100	0.0438801	0.965	-0.0150403	0.988	0.0203928	0.998898	0.000478898
HOXB7	-0.0325919	0.974	-0.0288302	0.977	-0.043432	0.998809	-0.000517443
SNAI1	-0.0777838	0.938	-0.00125331	0.999	-0.0558877	0.997976	-0.000879688
TAF1B	0.0100267	0.992	-0.0928786	0.926	-0.0585852	0.996593	-0.00148234
FOXD3	-0.128188	0.898	0.00877331	0.993	-0.0844391	0.993913	-0.00265155
ZNF721	0.061451	0.951	-0.0828133	0.934	-0.0151054	0.993508	-0.00282883
MAFF	-0.13198	0.895	-0.0150403	0.988	-0.103959	0.993028	-0.00303866
PGR	-0.0351	0.972	-0.124398	0.901	-0.112782	0.991943	-0.00351341
FOXO1	-0.084071	0.933	-0.0865867	0.931	-0.120673	0.990965	-0.00394162
TCF21	0.0501536	0.96	-0.1459	0.884	-0.0677032	0.987919	-0.00527867
ZC3HAV1L	0.0903614	0.928	-0.128188	0.898	-0.0267476	0.98527	-0.00644478
NR5A2	-0.194225	0.846	-0.0300841	0.976	-0.15861	0.98384	-0.00707534
NR1H4	-0.130716	0.896	0.121872	0.903	-0.00625328	0.980491	-0.00855624
TGIF1	-0.0601954	0.952	-0.194225	0.846	-0.179902	0.9797	-0.00890694
ZNF366	-0.0853288	0.932	-0.198058	0.843	-0.200384	0.97519	-0.010911
GATAD1	-0.223688	0.823	-0.0601954	0.952	-0.200736	0.974661	-0.0111466
ZNF160	-0.217267	0.828	-0.068987	0.945	-0.202412	0.974407	-0.0112595
ZNF226	-0.0413712	0.967	-0.246881	0.805	-0.203825	0.973409	-0.0117044
ZNF587	-0.209574	0.834	-0.0991741	0.921	-0.218318	0.970756	-0.0128901
ZNF326	-0.138304	0.89	-0.172557	0.863	-0.219812	0.970744	-0.0128953
ZFP112	-0.187843	0.851	-0.142101	0.887	-0.233306	0.967138	-0.0145118
SCAND3	-0.0438801	0.965	-0.297611	0.766	-0.241471	0.962573	-0.0165661
ZNF354B	0.0627068	0.95	-0.291067	0.771	-0.161475	0.960506	-0.0175
FOXS1	-0.27411	0.784	-0.0878448	0.93	-0.255941	0.959461	-0.0179725
ZFP36L2	-0.312053	0.755	-0.0539186	0.957	-0.258781	0.957351	-0.0189287
ZNF512	-0.0740131	0.941	-0.309423	0.757	-0.27113	0.953965	-0.0204677
ELF1	-0.101693	0.919	-0.287147	0.774	-0.274952	0.953614	-0.0206273
ZC3H11A	-0.244298	0.807	-0.149702	0.881	-0.2786	0.953499	-0.0206799
ZNF384	-0.337155	0.736	0.0463893	0.963	-0.205602	0.952745	-0.0210233
MYC	0.119348	0.905	-0.283231	0.777	-0.115883	0.950801	-0.0219103
BTAF1	0.0338459	0.973	-0.373199	0.709	-0.239959	0.945981	-0.0241176
ARNT2	-0.243007	0.808	0.187843	0.851	-0.0390071	0.945142	-0.0245028
TAF13	-0.124398	0.901	-0.301544	0.763	-0.301186	0.945088	-0.0245278
HOXA5	-0.0714998	0.943	-0.357123	0.721	-0.303082	0.942213	-0.0258509
STAT6	-0.276714	0.782	0.164929	0.869	-0.0790438	0.94208	-0.0259123
ZNF774	-0.0740131	0.941	-0.365149	0.715	-0.310535	0.939441	-0.0271303
SOX17	-0.259823	0.795	-0.203173	0.839	-0.327388	0.937114	-0.0282077
KLF8	-0.397498	0.691	0.0488987	0.961	-0.246497	0.935911	-0.0287654
CREBBP	-0.386671	0.699	0.0652185	0.948	-0.227301	0.935337	-0.029032
TFCP2	0.0551738	0.956	-0.404289	0.686	-0.246862	0.932488	-0.0303566
IRF9	-0.369171	0.712	-0.106734	0.915	-0.336516	0.930645	-0.0312161
THRB	-0.00751996	0.994	-0.463508	0.643	-0.333067	0.92524	-0.0337455
HMG20A	-0.204452	0.838	-0.313369	0.754	-0.366155	0.921935	-0.0352996
ZNF642	0.0601954	0.952	-0.438533	0.661	-0.267525	0.920746	-0.0358604
ZFYVE1	-0.215984	0.829	-0.309423	0.757	-0.371519	0.919947	-0.0362372
MEF2A	-0.0137869	0.989	-0.485954	0.627	-0.35337	0.916431	-0.0379
CEBPB	0.0878448	0.93	-0.431644	0.666	-0.243103	0.916086	-0.038064
ZFAND6	-0.180194	0.857	-0.362471	0.717	-0.383722	0.913713	-0.03919
ZKSCAN1	-0.365149	0.715	-0.190395	0.849	-0.392829	0.910048	-0.0409357
MITF	-0.0413712	0.967	-0.487365	0.626	-0.373873	0.9092	-0.0413403
NR3C2	-0.442676	0.658	-0.104213	0.917	-0.386709	0.908215	-0.0418111
NFATC2	-0.404289	0.686	0.154773	0.877	-0.176434	0.907322	-0.0422387
IFI16	-0.276714	0.782	-0.293683	0.769	-0.403331	0.907188	-0.0423029
MAFB	-0.292375	0.77	-0.279319	0.78	-0.404249	0.906802	-0.0424877
GON4L	-0.318639	0.75	-0.254642	0.799	-0.405371	0.906112	-0.0428182
ZNF740	-0.0601954	0.952	-0.488776	0.625	-0.388182	0.90392	-0.0438698
ZNF622	-0.48032	0.631	-0.0727564	0.942	-0.391084	0.90361	-0.0440192
CLOCK	-0.0514085	0.959	-0.501527	0.616	-0.390985	0.901695	-0.0449401
FUBP1	0.00125331	0.999	-0.537387	0.591	-0.379104	0.901519	-0.0450251
ZNF407	-0.413828	0.679	-0.166199	0.868	-0.410141	0.900972	-0.0452889
HOXA4	-0.119348	0.905	-0.455152	0.649	-0.406232	0.899896	-0.0458075
ZNF827	-0.563639	0.573	-0.0125335	0.99	-0.407415	0.888867	-0.0511634
TSC22D3	0.0250689	0.98	-0.565108	0.572	-0.381866	0.885023	-0.0530456
ARID4A	0.279319	0.78	-0.366489	0.714	-0.0616387	0.882904	-0.0540865
ETV5	-0.478914	0.632	-0.154773	0.877	-0.448084	0.881343	-0.054855
TFDP1	-0.37858	0.705	-0.280622	0.779	-0.466126	0.878329	-0.056343
ZNF175	-0.0426256	0.966	-0.593271	0.553	-0.449647	0.869134	-0.0609132
REST	-0.430269	0.667	-0.259823	0.795	-0.487969	0.866654	-0.0621544
RBL2	0.199336	0.842	-0.484544	0.628	-0.201672	0.865707	-0.0626291
DZIP3	0.0564291	0.955	-0.599259	0.549	-0.383839	0.862833	-0.0640734
RREB1	-0.438533	0.661	-0.276714	0.782	-0.505756	0.858007	-0.0665093
GATA3	0.306794	0.759	-0.41656	0.677	-0.0776164	0.855979	-0.0675369
ZSCAN12	0.25076	0.802	-0.476104	0.634	-0.159343	0.852372	-0.0693709
ZNF248	-0.0752699	0.94	-0.612813	0.54	-0.486548	0.851784	-0.0696705
ZNF502	-0.121872	0.903	-0.581357	0.561	-0.497258	0.851093	-0.0700228
MSC	0.331853	0.74	-0.415194	0.678	-0.0589306	0.847763	-0.0717256
TAF1D	-0.0451346	0.964	-0.647977	0.517	-0.490104	0.845454	-0.0729102
TP63	-0.0878448	0.93	-0.620392	0.535	-0.500799	0.844869	-0.0732104
HOXA7	0.298921	0.765	-0.453762	0.65	-0.109489	0.84466	-0.0733181
ZBTB17	-0.104213	0.917	-0.612813	0.54	-0.507014	0.843209	-0.0740646
HLX	-0.442676	0.658	0.317321	0.751	-0.0886394	0.84249	-0.0744353
ZNF350	0.0125335	0.99	-0.678234	0.497623	-0.470722	0.841422	-0.0749859
MAPK8IP1	-0.339809	0.734	-0.430269	0.667	-0.544528	0.83924	-0.0761137
ZCCHC7	0.209574	0.834	-0.543189	0.587	-0.235901	0.839226	-0.0761211
NFKB1	-0.497268	0.619	-0.267609	0.789	-0.54085	0.838391	-0.0765534
ZNF12	0.244298	0.807	-0.517224	0.605	-0.192988	0.838279	-0.0766113
ZNF781	0.200615	0.841	-0.554846	0.579	-0.250479	0.837348	-0.0770939
CREB3L1	-0.298921	0.765	-0.474701	0.635	-0.547034	0.836509	-0.0775292
ZNF462	-0.631062	0.528	-0.123135	0.902	-0.533298	0.829543	-0.0811613
INSM1	0.0501536	0.96	-0.68549	0.493035	-0.449251	0.827351	-0.0823103
ZFYVE19	-0.560703	0.575	-0.223688	0.823	-0.554648	0.827285	-0.0823451
ZNF347	-0.40565	0.685	-0.398855	0.69	-0.568871	0.826854	-0.0825712
RXRA	-0.699599	0.484178	0.0426256	0.966	-0.46455	0.82313	-0.0845314
PHF2	-0.0878448	0.93	-0.671346	0.502	-0.536829	0.822479	-0.084875
CEBPD	-0.0125335	0.99	-0.729632	0.465615	-0.52479	0.817947	-0.0872748
ZHX1	0.101693	0.919	-0.672917	0.501	-0.403916	0.817528	-0.0874971
NR1D2	0.138304	0.89	-0.647977	0.517	-0.360393	0.817304	-0.0876163
MAF	-0.427521	0.669	-0.41656	0.677	-0.596856	0.811645	-0.0906338
GATA6	-0.177647	0.859	-0.635657	0.525	-0.575093	0.810106	-0.0914582
PCGF2	-0.684247	0.493819	-0.118085	0.906	-0.567334	0.807245	-0.0929945
HMG20B	-0.341138	0.733	-0.520091	0.603	-0.608981	0.802868	-0.0953558
HDAC1	-0.317321	0.751	-0.546096	0.585	-0.610528	0.800685	-0.0965383
ZBTB49	-0.628006	0.53	0.218551	0.827	-0.289529	0.799841	-0.0969965
SOX15	-0.578391	0.563	-0.281926	0.778	-0.608336	0.799596	-0.0971291
RCHY1	0.194225	0.846	-0.672917	0.501	-0.338487	0.787669	-0.103656
TFEC	0.411099	0.681	-0.494434	0.621	-0.0589265	0.786857	-0.104104
ZBTB46	-0.407011	0.684	-0.51293	0.608	-0.650497	0.780749	-0.107489
RNF141	0.310738	0.756	-0.603765	0.546	-0.207201	0.778021	-0.109009
HOXB4	-0.553385	0.58	0.377234	0.706	-0.124558	0.775091	-0.110647
GTF2I	-0.637192	0.524	-0.287147	0.774	-0.653606	0.771587	-0.112615
ZNF621	-0.638728	0.523	-0.28976	0.772	-0.65654	0.76994	-0.113543
ZFHX3	-0.257232	0.797	-0.666643	0.505	-0.653278	0.768786	-0.114195
DBX2	0.16747	0.867	-0.733605	0.46319	-0.400318	0.767966	-0.114658
ZNF528	-0.699384	0.484312	-0.224973	0.822	-0.65362	0.764775	-0.116466
PHOX2A	-0.0501536	0.96	-0.817577	0.413599	-0.613578	0.763807	-0.117017
PBX3	-0.121872	0.903	-0.774979	0.438352	-0.634169	0.762676	-0.11766
ZNF529	0.365149	0.715	-0.60076	0.548	-0.166602	0.758937	-0.119794
MTA3	-0.802889	0.422039	-0.0928786	0.926	-0.633403	0.757987	-0.120338
ERV3	-0.219835	0.826	-0.725206	0.468326	-0.668245	0.754236	-0.122493
UBP1	-0.661955	0.508	0.308108	0.758	-0.250208	0.752548	-0.123466
USF1	-0.554846	0.579	-0.437154	0.662	-0.70145	0.750859	-0.124442
EWSR1	-0.686043	0.492686	-0.302855	0.762	-0.699257	0.743229	-0.128877
ZNF568	0.0451346	0.964	-0.875085	0.381528	-0.586864	0.735672	-0.133316
ZNF789	-0.573952	0.566	0.455152	0.649	-0.0840047	0.735213	-0.133587
CIC	-0.742019	0.458076	-0.268909	0.788	-0.714834	0.728778	-0.137405
TAF9	-0.239136	0.811	-0.767928	0.44253	-0.712102	0.726661	-0.138668
ZNF335	-0.702543	0.48234	-0.333178	0.739	-0.732365	0.72415	-0.140172
PPARG	-0.36783	0.713	-0.676691	0.498602	-0.738588	0.723172	-0.140758
NFIB	-0.270208	0.787	-0.763285	0.445294	-0.73079	0.717906	-0.143933
ZNF131	0.275412	0.783	-0.762917	0.445513	-0.344719	0.716214	-0.144957
SALL4	-0.731717	0.464342	-0.326561	0.744	-0.748315	0.712653	-0.147122
ZKSCAN4	-0.420665	0.674	-0.660396	0.509	-0.764425	0.710089	-0.148687
ZRANB1	-0.0463893	0.963	-0.924465	0.355244	-0.686498	0.709055	-0.14932
ZCCHC9	-0.123135	0.902	-0.888668	0.374181	-0.715453	0.704102	-0.152365
ZNF611	0.441294	0.659	-0.657281	0.511	-0.152726	0.703272	-0.152876
ESRRG	-0.870071	0.384261	0.162388	0.871	-0.500407	0.701027	-0.154265
RBCK1	-0.946002	0.344148	0.0351	0.972	-0.644105	0.70083	-0.154387
IKZF2	-0.485954	0.627	-0.624956	0.532	-0.785532	0.699791	-0.155032
NR2C1	-0.258527	0.796	-0.812097	0.416736	-0.757046	0.697763	-0.156292
TAF12	0.524401	0.6	-0.599259	0.549	-0.0529331	0.695193	-0.157895
ZNF277	0.484544	0.628	-0.641805	0.521	-0.1112	0.692729	-0.159437
CARHSP1	-0.366489	0.714	-0.741801	0.458208	-0.78368	0.692698	-0.159456
ZFC3H1	-0.164929	0.869	-0.888365	0.374345	-0.744791	0.69062	-0.160761
ZNF501	-0.031338	0.975	-0.967653	0.333218	-0.706393	0.690151	-0.161056
ZNF792	-0.791712	0.428529	-0.316003	0.752	-0.783273	0.687179	-0.16293
RFX7	-0.137039	0.891	-0.915704	0.359822	-0.744402	0.685304	-0.164117
ZNF701	0.350451	0.726	-0.772078	0.440068	-0.298135	0.684037	-0.164921
HOXB3	-0.617356	0.537	0.53594	0.592	-0.0575697	0.682224	-0.166073
ZNF192	-0.147167	0.883	-0.918643	0.358282	-0.753642	0.680455	-0.167201
ZNF532	-0.983339	0.325441	0.0426256	0.966	-0.665185	0.678161	-0.168667
ZNF677	0.100434	0.92	-0.955474	0.339338	-0.604605	0.675625	-0.170294
BCL6B	-0.431644	0.666	-0.72975	0.465543	-0.82123	0.673127	-0.171903
TCF20	-0.487365	0.626	-0.704175	0.481324	-0.842546	0.662765	-0.178641
ZXDC	-1.0054	0.314705	0.0702433	0.944	-0.661254	0.657664	-0.181996
ZNF592	-0.709648	0.477923	-0.504372	0.614	-0.858442	0.653227	-0.184936
TFAP2C	-0.689692	0.490388	-0.530161	0.596	-0.862566	0.651786	-0.185895
EGR2	-0.494434	0.621	-0.722044	0.470268	-0.860179	0.651497	-0.186088
ZC3H7A	-0.711633	0.476692	-0.508647	0.611	-0.862868	0.650539	-0.186727
TBL1XR1	0.585815	0.558	-0.661955	0.508	-0.0538393	0.640819	-0.193265
ZSCAN20	-0.848446	0.39619	0.371856	0.71	-0.337	0.638075	-0.195128
GPBP1	-0.111777	0.911	-1.01874	0.308328	-0.799395	0.637557	-0.195481
RFX5	-0.641805	0.521	-0.614326	0.539	-0.888218	0.637472	-0.195539
ZFAND2A	-0.754239	0.450706	-0.497268	0.619	-0.884949	0.635139	-0.197131
IRF2	-0.300232	0.764	-0.916309	0.359505	-0.860224	0.629584	-0.200946
TAF2	0.281926	0.778	-0.932045	0.351313	-0.459703	0.627849	-0.202145
ZCCHC24	-0.485954	0.627	-0.780418	0.435145	-0.89546	0.627218	-0.202581
TEAD2	-0.746364	0.455448	-0.537387	0.591	-0.907749	0.622431	-0.205909
ZFP36L1	-0.582842	0.56	-0.715084	0.474557	-0.917772	0.617924	-0.209065
NOTCH2	-0.544642	0.586	-0.751216	0.452523	-0.91631	0.617164	-0.2096
RFX3	0.109255	0.913	-1.06281	0.287869	-0.674264	0.614028	-0.211812
GATAD2B	-0.599259	0.549	-0.712698	0.476033	-0.927694	0.612043	-0.213218
SP4	-0.021308	0.983	-1.11559	0.264598	-0.803908	0.610373	-0.214405
KLF10	0.253347	0.8	-0.988845	0.322739	-0.520076	0.607796	-0.216242
SP3	0.491603	0.623	-0.830633	0.406181	-0.23973	0.600784	-0.221281
ZRANB3	-0.442676	0.658	-0.873918	0.382163	-0.930972	0.598598	-0.222865
PRRX1	-0.504372	0.614	-0.826054	0.408773	-0.940753	0.59794	-0.223343
ZNF343	0.524401	0.6	-0.82069	0.411823	-0.209508	0.592528	-0.227291
ZC3H8	-0.703584	0.481692	-0.661955	0.508	-0.965582	0.589169	-0.22976
ZNF512B	-0.865652	0.386681	-0.478914	0.632	-0.950751	0.588723	-0.230089
MORC3	0.51293	0.608	-0.845305	0.39794	-0.235025	0.58528	-0.232637
ZNF804A	0.171285	0.864	-1.08495	0.277946	-0.646056	0.582715	-0.234544
PRDM1	-0.747172	0.45496	-0.632592	0.527	-0.97564	0.582171	-0.23495
ZBTB41	0.176374	0.86	-1.08514	0.277858	-0.642597	0.581019	-0.23581
JARID2	-0.452373	0.651	-0.906064	0.364902	-0.96056	0.579001	-0.237321
RFXAP	0.587303	0.557	-0.800906	0.423186	-0.15104	0.576354	-0.239311
RFX1	-0.835388	0.403499	0.547551	0.584	-0.203531	0.576251	-0.239388
PURA	-0.632592	0.527	-0.764505	0.444567	-0.987897	0.574286	-0.240872
NFIC	-0.634124	0.526	-0.765518	0.443963	-0.989697	0.573178	-0.24171
FOXN2	-0.214702	0.83	-1.08154	0.279457	-0.916582	0.570882	-0.243454
ARNTL	-0.669777	0.503	-0.738181	0.460404	-0.995577	0.570347	-0.243861
NFAT5	-0.863818	0.387688	-0.531604	0.595	-0.986712	0.569016	-0.244876
SMAD7	-0.816094	0.414446	-0.588793	0.556	-0.993405	0.56866	-0.245147
CREB1	-0.321278	0.748	-1.02013	0.307667	-0.948519	0.568223	-0.245481
ZNF250	0.0363541	0.971	-1.18747	0.235042	-0.813963	0.56541	-0.247636
RARA	-0.582842	0.56	-0.830783	0.406096	-0.999583	0.56421	-0.248559
ZFP28	0.218551	0.827	-1.10019	0.271249	-0.623413	0.559612	-0.252113
ZBTB47	-0.660396	0.509	-0.776966	0.437179	-1.01637	0.556915	-0.254211
RUNX1	-0.828299	0.407501	-0.61584	0.538	-1.02116	0.55195	-0.258101
ETV1	-0.424776	0.671	-0.986908	0.323688	-0.998212	0.548842	-0.260553
NOTCH1	-0.954435	0.339863	-0.48032	0.631	-1.01452	0.54464	-0.26389
ZNF618	-0.771716	0.440283	-0.696043	0.486402	-1.03786	0.544179	-0.264259
TOP2B	-0.481727	0.63	-0.965412	0.334339	-1.02328	0.538724	-0.268634
ZNF33A	-0.0765268	0.939	-1.21518	0.224297	-0.913376	0.538694	-0.268658
HOXB6	-1.25189	0.210611	-0.0150403	0.988	-0.895853	0.534736	-0.27186
ZMYM2	0.177647	0.859	-1.16955	0.242181	-0.701383	0.534658	-0.271924
ZNF577	-0.638728	0.523	-0.854945	0.392581	-1.05619	0.53038	-0.275413
ZNF10	-0.170013	0.865	-1.1951	0.23205	-0.965277	0.52305	-0.281457
CREM	-0.189118	0.85	-1.18825	0.234736	-0.973944	0.521124	-0.283059
BBX	-0.316003	0.752	-1.11719	0.263915	-1.01342	0.519409	-0.28449
JUNB	-0.309423	0.757	-1.12223	0.261763	-1.01233	0.518909	-0.284909
NPAS2	-0.689705	0.49038	-0.841556	0.400036	-1.08277	0.515686	-0.287615
HOXA2	-0.265012	0.791	-1.15762	0.247018	-1.00595	0.514417	-0.288685
CSDA	-0.640266	0.522	-0.889704	0.373625	-1.08185	0.51383	-0.289181
BLZF1	-0.0338459	0.973	-1.28294	0.199513	-0.931109	0.512346	-0.290436
PRDM5	-1.22998	0.218706	-0.1459	0.884	-0.972893	0.51105	-0.291537
ZFHX2	-1.08807	0.276563	-0.392079	0.695	-1.04662	0.509199	-0.293113
ASH1L	-1.17449	0.2402	-0.259823	0.795	-1.01421	0.507129	-0.294882
ZNF454	-0.222403	0.824	-1.19649	0.231504	-1.00331	0.506799	-0.295164
AEBP2	0.0928786	0.926	-1.26513	0.205824	-0.828909	0.506522	-0.295402
ZNF259	-0.930081	0.352329	-0.624956	0.532	-1.09958	0.501269	-0.29993
ZUFSP	-0.00877331	0.993	-1.31563	0.188299	-0.936494	0.5005	-0.300596
DMAP1	-0.575431	0.565	-0.973335	0.330387	-1.09514	0.499977	-0.30105
GABPB2	-0.524401	0.6	-1.0149	0.310152	-1.08845	0.499007	-0.301894
ZNF337	-1.02506	0.305334	0.524401	0.6	-0.354021	0.494124	-0.306164
ZNF232	0.52872	0.597	-1.02394	0.305863	-0.350175	0.493104	-0.307062
IRF6	-1.29607	0.194952	-0.0953964	0.924	-0.983915	0.488896	-0.310784
ZNF84	-0.470497	0.638	-1.08093	0.279729	-1.09702	0.486029	-0.313338
ZFP106	-0.643345	0.52	-0.948173	0.343041	-1.12537	0.485881	-0.31347
ZNF644	-0.130716	0.896	-1.30393	0.192256	-1.01445	0.475225	-0.323101
ZNF514	-0.737043	0.461096	-0.906408	0.36472	-1.1621	0.467982	-0.329771
ZNF711	-0.827076	0.408194	-0.824075	0.409897	-1.16754	0.466458	-0.331188
ZNF451	-0.400213	0.689	-1.17672	0.239308	-1.11506	0.462088	-0.335275
ZNF346	-0.0463893	0.963	-1.38083	0.167332	-1.00919	0.4553	-0.341702
CASZ1	-0.618873	0.536	-1.04323	0.296843	-1.17528	0.451576	-0.345269
CC2D1A	-1.39551	0.162861	-0.031338	0.975	-1.00894	0.45099	-0.345833
SMAD2	-0.501527	0.616	-1.13936	0.254555	-1.16028	0.447327	-0.349375
HES4	-0.851873	0.394285	-0.850515	0.395039	-1.20377	0.445382	-0.351267
CSRNP1	-0.703555	0.48171	-0.989201	0.322565	-1.19696	0.444684	-0.351948
PBX2	-0.605269	0.545	-1.07305	0.283248	-1.18675	0.442796	-0.353797
FOXJ3	-0.43302	0.665	-1.19734	0.231175	-1.15284	0.441601	-0.35497
ELK3	-0.646431	0.518	-1.05091	0.2933	-1.2002	0.438216	-0.358312
C2orf3	-0.739451	0.459633	-0.986856	0.323713	-1.22068	0.432266	-0.364249
ZNF382	-0.841985	0.399796	-0.901964	0.367076	-1.23316	0.428378	-0.368173
ZMYM4	-0.0263226	0.979	-1.44842	0.147501	-1.0428	0.423845	-0.372793
LCOR	0.730165	0.465289	-1.01876	0.308319	-0.204065	0.422011	-0.374676
ZNF667	-1.31126	0.18977	0.313369	0.754	-0.705616	0.42129	-0.375419
ZNHIT6	-1.16478	0.244109	-0.546096	0.585	-1.20977	0.42074	-0.375986
ZNF70	-0.258527	0.796	-1.35392	0.175761	-1.14017	0.415071	-0.381878
ZNF193	-0.068987	0.945	-1.44971	0.147139	-1.07388	0.413378	-0.383652
ZNF841	-0.266311	0.79	-1.35942	0.174014	-1.14956	0.41026	-0.38694
TADA2A	-0.889217	0.373887	-0.901443	0.367353	-1.26619	0.410017	-0.387198
ZNF615	0.666643	0.505	-1.10942	0.267248	-0.313092	0.405255	-0.392271
ZNF142	-1.30973	0.190288	-0.373199	0.709	-1.19001	0.405162	-0.392371
ZMYM1	0.287147	0.774	-1.35953	0.17398	-0.758286	0.404655	-0.392915
TCF7L1	-1.09596	0.273098	-0.69276	0.48846	-1.26481	0.402117	-0.395648
MIER3	0.705429	0.480543	-1.0905	0.275494	-0.272284	0.400077	-0.397857
ZNF638	-0.820997	0.411648	-0.993065	0.320678	-1.28274	0.399307	-0.398693
AHR	-0.73931	0.459719	-1.06829	0.28539	-1.27817	0.39767	-0.400477
FOSL2	-0.812713	0.416383	-1.00607	0.314382	-1.28607	0.397069	-0.401135
DNMT3A	-0.951164	0.341521	0.875813	0.381132	-0.0532811	0.395565	-0.402783
ZMYND12	-1.19311	0.232825	-0.588793	0.556	-1.26	0.394106	-0.404386
PHTF1	-0.771818	0.440222	-1.06344	0.28758	-1.29773	0.388246	-0.410893
ZMIZ2	-1.46306	0.143451	-0.149702	0.881	-1.1404	0.387793	-0.411401
MEF2C	-0.911656	0.36195	-0.954647	0.339756	-1.31968	0.380702	-0.419415
ZDHHC8	-1.32744	0.184365	-0.450985	0.652	-1.25753	0.374868	-0.426122
EP300	-1.16265	0.244972	-0.697045	0.485775	-1.315	0.37231	-0.429095
GATA2	-0.357123	0.721	-1.38982	0.164583	-1.23528	0.371592	-0.429934
ZFP3	-0.00877331	0.993	-1.55934	0.118917	-1.10882	0.370355	-0.431382
AEBP1	-0.861091	0.389188	-1.03401	0.30113	-1.34004	0.368454	-0.433617
ZBTB48	-0.792097	0.428304	-1.09744	0.272449	-1.3361	0.36737	-0.434897
MAFK	-1.38011	0.167551	0.397498	0.691	-0.694815	0.365405	-0.437226
ZNF623	-1.22492	0.220607	-0.692916	0.488362	-1.35611	0.34778	-0.458696
IKZF5	-0.547551	0.584	-1.33324	0.182452	-1.32992	0.345136	-0.46201
ZRANB2	-0.253347	0.8	-1.50647	0.131946	-1.24438	0.342902	-0.46483
TARDBP	-0.82204	0.411054	-1.13575	0.25606	-1.38437	0.342222	-0.465692
CREBL2	-0.386671	0.699	-1.43795	0.150447	-1.29021	0.342014	-0.465956
BCLAF1	-0.559237	0.576	-1.35063	0.176813	-1.35048	0.334488	-0.475619
BAZ2A	-1.19145	0.233476	-0.78651	0.431569	-1.39863	0.332008	-0.478852
HSF2	-0.795087	0.426563	-1.18453	0.236204	-1.3998	0.331996	-0.478867
AFF1	-1.00595	0.314441	-0.998396	0.318087	-1.41728	0.330304	-0.481086
ZCCHC11	-0.338482	0.735	-1.49068	0.136046	-1.29341	0.330244	-0.481164
MEIS1	-0.236558	0.813	-1.54277	0.122886	-1.25818	0.330043	-0.48143
ZNF133	-1.13994	0.254313	-0.864005	0.387585	-1.417	0.32695	-0.485518
DMTF1	-0.969767	0.332162	-1.04389	0.296536	-1.42387	0.326789	-0.485733
RARB	-0.470497	0.638	-1.42817	0.153243	-1.34256	0.325096	-0.487988
ERG	-0.988149	0.32308	-1.04347	0.296731	-1.43657	0.320657	-0.493959
ZNF197	-0.854113	0.393042	-1.16709	0.243173	-1.42921	0.319975	-0.494884
KDM5B	-0.785277	0.432291	-1.22551	0.220381	-1.42184	0.319251	-0.495868
ZFY	-0.931385	0.351655	-1.10485	0.269224	-1.43984	0.31785	-0.497777
ZCCHC6	-0.683382	0.494365	-1.31743	0.187695	-1.41479	0.313391	-0.503914
NFIX	-0.855121	0.392484	-1.18546	0.235837	-1.44291	0.312848	-0.504666
RLF	-0.09162	0.927	-1.65939	0.0970374	-1.23815	0.306604	-0.513423
ZFP36	-0.746117	0.455597	-1.29716	0.194578	-1.44481	0.303452	-0.517911
MMP14	-0.799466	0.42402	-1.25616	0.209057	-1.45355	0.30344	-0.517927
TCF4	-0.53594	0.592	-1.44686	0.147936	-1.40205	0.300851	-0.521649
DENND4A	-0.444059	0.657	-1.50193	0.133114	-1.37602	0.300553	-0.522079
KLF4	-0.715986	0.474	-1.3385	0.180732	-1.45274	0.296175	-0.528451
DDIT3	0.976564	0.328785	-1.15439	0.248342	-0.12574	0.286211	-0.543313
NOTCH4	-1.45593	0.145412	-0.581357	0.561	-1.44058	0.286023	-0.543599
ZNF207	-0.640266	0.522	-1.44701	0.147895	-1.47592	0.27494	-0.560762
SNAI2	-0.876453	0.380784	-1.27681	0.201671	-1.52258	0.273893	-0.562419
ZNF280D	-0.343796	0.731	-1.62454	0.10426	-1.39182	0.272406	-0.564784
TEAD3	-1.34265	0.179384	-0.838781	0.401592	-1.54251	0.261542	-0.582458
EBF4	-1.37361	0.169563	-0.815874	0.414572	-1.5482	0.256935	-0.590177
MLLT10	-0.724593	0.468702	-1.45327	0.14615	-1.53998	0.252145	-0.59835
REL	-0.881795	0.377888	-1.34186	0.179642	-1.57236	0.25049	-0.60121
SOX13	-1.18994	0.234071	-1.07128	0.284045	-1.59892	0.246716	-0.607803
ZFAND5	-0.792758	0.427919	-1.42359	0.154566	-1.56719	0.24578	-0.609454
ZFAND1	-0.972607	0.330749	-1.28197	0.199854	-1.59422	0.24567	-0.609647
ZMYM6	-0.666643	0.505	-1.51371	0.130099	-1.54174	0.244578	-0.611582
SOX10	-1.01769	0.308825	-1.24643	0.212607	-1.60097	0.244465	-0.611783
ZNF536	-1.25879	0.208106	-1.00591	0.31446	-1.60138	0.243873	-0.612836
MXD1	-0.718826	0.472248	-1.49654	0.134512	-1.5665	0.238615	-0.622302
ZDHHC2	-0.415194	0.678	-1.68613	0.0917702	-1.48586	0.23501	-0.628913
ASH2L	-0.666643	0.505	-1.57255	0.115824	-1.58335	0.22454	-0.648706
BHLHE40	-0.814688	0.415251	-1.47388	0.140514	-1.61826	0.224135	-0.64949
ZNF318	-0.889415	0.37378	-1.42607	0.153847	-1.6373	0.221733	-0.65417
LASS4	-1.48664	0.137111	-0.812828	0.416317	-1.62597	0.220522	-0.656548
ALS2CR8	-0.735223	0.462203	-1.54673	0.121929	-1.61358	0.21844	-0.660668
NR2F2	-1.12079	0.262379	-1.24295	0.213887	-1.67141	0.217759	-0.662024
TFDP2	-1.02527	0.305236	-1.33447	0.18205	-1.66859	0.216168	-0.665209
GLIS3	-0.846536	0.397254	-1.50466	0.132412	-1.66254	0.207513	-0.682955
ZFP2	-0.525839	0.599	-1.72485	0.0845542	-1.59148	0.201724	-0.695243
SREBF1	-1.57112	0.116155	-0.782665	0.433824	-1.66438	0.200956	-0.6969
MECOM	-1.0715	0.283945	-1.34944	0.177196	-1.71186	0.200726	-0.697397
ZNF692	-1.01013	0.312432	-1.41167	0.158047	-1.71247	0.197922	-0.703507
RXRB	-0.844128	0.398598	-1.55578	0.119762	-1.69699	0.192954	-0.714545
BNC2	-1.23298	0.217582	-1.23303	0.217565	-1.74373	0.19174	-0.717287
MEF2D	-1.60206	0.109142	-0.821936	0.411114	-1.71403	0.184145	-0.73484
NOTCH3	-1.26505	0.205854	-1.24654	0.212566	-1.77596	0.180679	-0.743092
GAS7	-1.04816	0.294566	-1.45202	0.146497	-1.76789	0.178783	-0.747675
FOXP4	-1.15905	0.246435	-1.35752	0.174616	-1.77948	0.178401	-0.748602
EBF2	-1.07075	0.28428	-1.43563	0.151108	-1.77228	0.178166	-0.749175
ZMYM5	-0.661955	0.508	-1.73268	0.083152	-1.69327	0.175908	-0.754716
NFE2L2	-0.375888	0.707	-1.8846	0.0594841	-1.59841	0.175319	-0.756172
TBX20	-0.96621	0.333939	-1.53637	0.124447	-1.76959	0.173739	-0.760102
ZFYVE20	-1.3858	0.165808	-1.1523	0.249197	-1.79471	0.172979	-0.762008
SPEN	-1.55802	0.119227	-0.969557	0.332267	-1.78727	0.167515	-0.775946
ZNF800	0.62648	0.531	-1.81132	0.0700914	-0.837808	0.159703	-0.796688
ZNF565	-0.846297	0.397387	-1.6779	0.0933667	-1.78488	0.159322	-0.797726
NRK	-0.898597	0.368868	-1.64295	0.100394	-1.79714	0.159089	-0.798359
HEYL	-1.11218	0.26606	-1.48174	0.138409	-1.83418	0.158406	-0.800229
ZMYND11	-0.981379	0.326406	-1.58577	0.112792	-1.81525	0.158376	-0.80031
ZC3H7B	-1.3349	0.181911	-1.27753	0.201415	-1.84726	0.157793	-0.801913
HES1	-1.19861	0.23068	-1.41268	0.157751	-1.84646	0.156967	-0.804191
ATF3	-1.06074	0.288808	-1.5317	0.125596	-1.83313	0.156579	-0.805266
BRD8	-1.75724	0.0788761	-0.753618	0.451078	-1.77545	0.154272	-0.811714
ZNF540	-1.05838	0.289881	-1.54881	0.121426	-1.84357	0.153001	-0.815305
JDP2	-1.02576	0.305002	-1.58274	0.113481	-1.84449	0.151032	-0.820932
ZBTB10	0.1143	0.909	-2.07624	0.0378717	-1.3873	0.150403	-0.822743
GLI3	-1.23266	0.217702	-1.42557	0.153994	-1.87965	0.147357	-0.83163
ETV6	-1.07585	0.281993	-1.56015	0.118724	-1.86394	0.147203	-0.832085
ZDHHC21	-0.646431	0.518	-1.84995	0.0643208	-1.76521	0.146655	-0.833703
GRHL1	-0.993171	0.320627	-1.63496	0.102057	-1.85837	0.144622	-0.839765
MLXIP	-1.6936	0.0903415	-0.911819	0.361864	-1.84231	0.144517	-0.840082
ZNF233	-1.11459	0.265028	-1.55433	0.120105	-1.88721	0.141563	-0.84905
RXRG	-1.10039	0.271164	-1.57047	0.116306	-1.88858	0.140551	-0.852167
ZFYVE16	-0.92737	0.353734	-1.71479	0.0863829	-1.86829	0.137143	-0.862825
KLF6	-0.761314	0.44647	-1.82728	0.0676581	-1.83041	0.135923	-0.866708
ZBTB22	0.172557	0.863	-2.11799	0.0341757	-1.37563	0.133417	-0.874789
KLF11	-0.794113	0.42713	-1.83214	0.0669307	-1.85704	0.130212	-0.885349
ZDHHC17	-0.73741	0.460873	-1.87642	0.0605976	-1.84826	0.127857	-0.893275
ZFP37	1.08559	0.277658	-1.66888	0.0951409	-0.412446	0.122408	-0.912188
TAL2	-0.878877	0.379468	-1.8203	0.0687139	-1.9086	0.121164	-0.916627
AFF4	-0.771167	0.440608	-1.88922	0.0588625	-1.88118	0.120655	-0.918455
ZNF238	-2.00879	0.044559	-0.568051	0.57	-1.8221	0.118689	-0.925588
TBP	-1.28704	0.198082	-1.52235	0.12792	-1.98654	0.118469	-0.926395
ZDHHC18	-1.45889	0.144596	-1.36395	0.172585	-1.99604	0.117056	-0.931606
HSF4	-1.85168	0.0640712	-0.91732	0.358975	-1.95798	0.109762	-0.959549
ZEB1	-0.452373	0.651	-2.12893	0.0332597	-1.82526	0.104637	-0.980315
CIR1	-0.880343	0.378674	-1.90326	0.0570062	-1.96831	0.104387	-0.981355
MIER1	-0.345126	0.73	-2.17871	0.029353	-1.78462	0.103776	-0.983903
SCAND2	-1.58242	0.113555	-1.31794	0.187524	-2.05086	0.103262	-0.986058
MNT	-1.94645	0.0516008	-0.822653	0.410705	-1.95805	0.102872	-0.987705
MORC2	-1.77513	0.075876	-1.08812	0.276544	-2.02462	0.102063	-0.991134
ZNF287	-0.223688	0.823	-2.2427	0.0249164	-1.744	0.100214	-0.99907
ZNF415	-0.907371	0.364211	-1.92338	0.0544321	-2.00164	0.0975541	-1.01075
ZBTB8A	-0.92169	0.35669	-1.93176	0.0533891	-2.01769	0.0944749	-1.02468
LZTR1	-1.53237	0.125431	-1.43575	0.151072	-2.09878	0.0941015	-1.0264
ZBTB40	-1.72378	0.0847469	-1.24069	0.214721	-2.0962	0.0911029	-1.04047
ZCCHC14	-1.46066	0.144107	-1.56214	0.118256	-2.13744	0.0864363	-1.0633
LZTS1	-1.65399	0.0981291	-1.36186	0.173243	-2.13253	0.0862678	-1.06415
ZMIZ1	-1.70126	0.088895	-1.30859	0.190673	-2.12828	0.086063	-1.06518
PPARA	-1.89974	0.0574679	-1.06835	0.285362	-2.09875	0.0838084	-1.07671
ZMAT4	-1.87099	0.0613465	-1.1219	0.261905	-2.11629	0.0824395	-1.08386
FLYWCH1	-2.06593	0.0388349	-0.827459	0.407977	-2.04594	0.0815158	-1.08876
CREB3L2	-1.29581	0.195043	-1.74791	0.0804792	-2.15223	0.0809063	-1.09202
NFIA	-1.42478	0.154221	-1.63702	0.101626	-2.16502	0.0808064	-1.09255
ZCCHC12	-1.41976	0.155677	-1.6424	0.100508	-2.16527	0.080698	-1.09314
ZC3HAV1	-1.63809	0.101403	-1.4296	0.152831	-2.16919	0.0800764	-1.0965
JUN	-0.737151	0.461031	-2.13171	0.0330307	-2.02859	0.0789521	-1.10264
NR3C1	-0.638728	0.523	-2.19983	0.0278189	-2.00716	0.0760959	-1.11864
HEY2	-1.31976	0.186916	-1.77657	0.0756396	-2.18943	0.0743511	-1.12871
RUNX1T1	-1.17637	0.239446	-1.90022	0.0574041	-2.17548	0.0726717	-1.13863
IKZF4	-1.92769	0.0538936	-1.16976	0.242099	-2.19023	0.0696631	-1.157
TFAP2A	-1.39256	0.163754	-1.76696	0.0772351	-2.23411	0.0679211	-1.168
ZHX3	-2.17161	0.0298854	-0.810379	0.417722	-2.10858	0.0672044	-1.1726
FOXJ2	-1.43312	0.151823	-1.76139	0.0781724	-2.25886	0.0644912	-1.1905
KLF5	-1.05902	0.28959	-2.04947	0.040416	-2.19804	0.0637616	-1.19544
GMEB1	-0.453762	0.65	-2.36829	0.0178704	-1.99549	0.0633684	-1.19813
TSC22D1	-1.3576	0.174589	-1.8508	0.0641978	-2.26869	0.0615456	-1.2108
ZNF684	-0.635657	0.525	-2.30643	0.0210868	-2.08037	0.0609264	-1.21519
ZNF643	-0.960193	0.336958	-2.14975	0.031575	-2.19906	0.0589765	-1.22932
EBF1	-1.2911	0.19667	-1.93734	0.0527039	-2.28285	0.0577271	-1.23862
NR2C2	-1.69809	0.08949	-1.5775	0.114681	-2.31619	0.0572586	-1.24216
ZFAND3	-0.971243	0.331427	-2.16863	0.0301106	-2.22023	0.0559572	-1.25214
HOXC6	-1.23393	0.217228	-2.01558	0.0438441	-2.29775	0.0538489	-1.26882
ZNF202	-1.93043	0.0535536	-1.34904	0.177324	-2.31894	0.0537193	-1.26987
SCMH1	-1.64611	0.0997409	-1.67494	0.0939467	-2.34834	0.0531317	-1.27465
TCF25	-0.841852	0.399871	-2.27854	0.0226941	-2.20645	0.0517464	-1.28612
ZNF362	-1.49897	0.133881	-1.84709	0.0647335	-2.36603	0.0498179	-1.30261
HOXC10	-1.54586	0.122138	-1.81633	0.0693191	-2.37743	0.0488655	-1.311
ZNF596	-1.09543	0.27333	-2.17133	0.0299064	-2.30994	0.0474663	-1.32361
L3MBTL1	-1.9209	0.0547443	-1.45585	0.145435	-2.38772	0.0464417	-1.33309
HMX1	-1.72953	0.0837141	-1.68491	0.0920061	-2.41437	0.045183	-1.34502
CSRNP2	-1.08929	0.276028	-2.21574	0.0267094	-2.33701	0.0435716	-1.3608
NFIL3	-0.864718	0.387193	-2.34809	0.0188698	-2.2718	0.0432459	-1.36405
TOX2	-1.8181	0.0690482	-1.62314	0.104559	-2.43333	0.0428192	-1.36836
KLF9	-1.19634	0.231563	-2.16638	0.0302822	-2.3778	0.0417936	-1.37889
GPBP1L1	-1.80758	0.0706716	-1.65674	0.0975713	-2.44965	0.0412137	-1.38496
STAT2	-1.58299	0.113424	-1.89974	0.0574669	-2.46266	0.0393249	-1.40533
BCL6	-2.12996	0.0331752	-1.29333	0.195896	-2.42063	0.0392281	-1.4064
ZNF471	-2.21368	0.0268511	-1.21075	0.225991	-2.42144	0.037044	-1.43128
PGBD1	-1.66432	0.0960485	-1.85974	0.062923	-2.49188	0.0369192	-1.43275
MYT1	-1.49664	0.134488	-2.00971	0.0444622	-2.47936	0.0365917	-1.43662
MEIS2	-0.720066	0.471484	-2.49285	0.0126723	-2.27187	0.0365669	-1.43691
TBX3	-2.474	0.0133609	-0.796534	0.425721	-2.31262	0.0350916	-1.4548
HEY1	-2.31143	0.020809	-1.10733	0.26815	-2.41743	0.0345319	-1.46178
TRPS1	-1.94251	0.0520759	-1.63463	0.102127	-2.52941	0.0331685	-1.47927
ZZZ3	-0.754522	0.450536	-2.54207	0.0110199	-2.33104	0.0313052	-1.50438
ZFPM2	-1.20174	0.229463	-2.33045	0.0197822	-2.49764	0.0290286	-1.53717
THRA	-1.57979	0.114156	-2.06119	0.039285	-2.57456	0.0287334	-1.54161
ZNF83	-1.81574	0.0694103	-1.90337	0.0569926	-2.62981	0.0258419	-1.58767
ZNF589	-1.72054	0.0853348	-2.0312	0.042235	-2.65288	0.0238797	-1.62197
ZNF436	-1.48112	0.138576	-2.22768	0.0259017	-2.62252	0.0237966	-1.62348
HAND1	-1.20914	0.22661	-2.43584	0.0148572	-2.57739	0.0225366	-1.64711
ZNF641	-1.51002	0.131038	-2.24179	0.0249751	-2.65293	0.0219995	-1.65759
ZNF323	0.129452	0.897	-2.91797	0.00352315	-1.97178	0.0213542	-1.67052
KLF12	-1.48516	0.137503	-2.29043	0.0219966	-2.66974	0.0205702	-1.68676
SHOX2	-1.27888	0.200938	-2.43559	0.0148677	-2.62653	0.0203547	-1.69134
ATF2	-0.880243	0.378728	-2.66246	0.00775727	-2.50507	0.020066	-1.69754
ZNF34	-1.49785	0.134173	-2.29272	0.0218639	-2.68034	0.0200407	-1.69809
STAT3	-1.92327	0.0544464	-1.93748	0.0526872	-2.72996	0.0196614	-1.70639
ZFHX4	-1.07337	0.283104	-2.57218	0.0101059	-2.5778	0.0196168	-1.70737
ETS2	-1.32309	0.185807	-2.42922	0.0151312	-2.65328	0.0193263	-1.71385
ZNF516	-2.41118	0.0159011	-1.35169	0.176475	-2.66075	0.0192949	-1.71456
ZMYND17	-2.0637	0.0390462	-1.83993	0.0657787	-2.76028	0.0178876	-1.74745
ZC3H13	-1.97468	0.0483048	-1.95432	0.0506637	-2.77822	0.0171623	-1.76542
ZCCHC17	-1.29881	0.194008	-2.49761	0.0125032	-2.68448	0.0170325	-1.76872
PHF1	-1.91328	0.0557119	-2.02516	0.0428506	-2.7849	0.0168008	-1.77467
ZFYVE9	-1.90142	0.0572476	-2.04104	0.0412467	-2.78774	0.0166436	-1.77875
ZKSCAN3	-2.09891	0.0358249	-1.84229	0.0654333	-2.78685	0.0165399	-1.78147
ZNF76	-2.1826	0.0290654	-1.81931	0.068864	-2.82978	0.0144389	-1.84047
ZNF187	-1.10647	0.268523	-2.67783	0.00741008	-2.6759	0.0143657	-1.84267
NPAT	-1.57855	0.11444	-2.38296	0.0171739	-2.80121	0.0142138	-1.84729
TSHZ3	-1.16786	0.242862	-2.65366	0.00796242	-2.70222	0.0140165	-1.85336
HLF	-2.33951	0.0193092	-1.68895	0.0912291	-2.84855	0.0129326	-1.88831
KLF3	-2.24846	0.0245471	-1.80242	0.0714801	-2.8644	0.0128886	-1.88979
CRTC2	-1.46746	0.14225	-2.5314	0.011361	-2.82762	0.0120039	-1.92068
TRERF1	-2.12877	0.0332729	-1.98297	0.0473709	-2.90744	0.0117468	-1.93008
APP	-2.43206	0.0150134	-1.62156	0.104897	-2.86634	0.0117384	-1.93039
ZNF713	-1.85899	0.0630285	-2.24978	0.0244629	-2.90534	0.0115251	-1.93836
ZNF438	-1.82835	0.0674978	-2.31643	0.0205347	-2.9308	0.010508	-1.97848
ZNF445	-2.22599	0.0260148	-1.93503	0.0529867	-2.94229	0.0104579	-1.98055
HIVEP1	-1.95648	0.0504092	-2.20741	0.0272854	-2.94431	0.0104381	-1.98138
C5orf41	-1.08616	0.277407	-2.82168	0.00477729	-2.76326	0.0101066	-1.9954
CREBZF	-1.3534	0.175929	-2.6797	0.00736879	-2.85183	0.00991496	-2.00371
FOXP1	-0.804852	0.420905	-2.96846	0.00299293	-2.66814	0.00967082	-2.01454
PROX1	-1.85525	0.0635599	-2.34831	0.018859	-2.97237	0.0092616	-2.03331
HBP1	-0.300232	0.764	-3.18804	0.00143243	-2.46658	0.00855534	-2.06776
ZFYVE27	-2.29632	0.0216575	-1.96759	0.0491151	-3.01504	0.00834586	-2.07853
ZC3H6	-2.09162	0.0364726	-2.20735	0.0272898	-3.03983	0.0078755	-2.10372
JAZF1	-2.07809	0.0377009	-2.31565	0.0205774	-3.10684	0.00633168	-2.19848
TULP4	-2.30665	0.0210743	-2.12076	0.0339417	-3.13065	0.00589606	-2.22944
RORA	-1.77973	0.0751208	-2.60704	0.00913294	-3.10191	0.0056838	-2.24536
NFRKB	-2.43035	0.0150841	-2.00294	0.0451836	-3.13481	0.00565085	-2.24789
ZNF706	-2.10419	0.0353622	-2.36	0.0182749	-3.15666	0.00539247	-2.26821
ZNF423	-1.721	0.0852502	-2.68605	0.00723032	-3.11625	0.00517249	-2.2863
PLAGL1	-2.62725	0.00860774	-1.89621	0.0579317	-3.19857	0.00429028	-2.36751
CBFB	-0.61584	0.538	-3.36134	0.000775641	-2.81229	0.00366456	-2.43598
PPARD	-2.55587	0.0105921	-2.08936	0.0366754	-3.28468	0.00343925	-2.46354
CBL	-2.45886	0.013938	-2.22994	0.0257518	-3.31548	0.00320609	-2.49402
MYT1L	-2.49917	0.0124483	-2.20975	0.0271226	-3.32971	0.0030365	-2.51763
SATB1	-2.3487	0.0188391	-2.39426	0.0166541	-3.35378	0.00284473	-2.54596
TSHZ1	-3.36141	0.000775455	-0.845712	0.397713	-2.97488	0.00280161	-2.55259
ZNF18	-2.44381	0.014533	-2.32902	0.0198579	-3.3749	0.00264078	-2.57827
HIVEP3	-2.87061	0.00409675	-1.82515	0.0679787	-3.32041	0.00255826	-2.59206
ZNF365	-2.43167	0.0150294	-2.39886	0.0164461	-3.4157	0.00230007	-2.63826
PRDM10	-2.4687	0.0135604	-2.36783	0.0178925	-3.41995	0.00226227	-2.64546
ZMYND8	-2.72626	0.00640573	-2.1167	0.0342849	-3.42449	0.00206961	-2.68411
CBFA2T2	-2.22143	0.0263221	-2.64117	0.00826195	-3.43838	0.00205151	-2.68793
ZNF483	-1.89618	0.0579358	-2.96515	0.00302539	-3.43748	0.00169128	-2.77178
EPAS1	-2.16021	0.0307566	-2.77439	0.00553051	-3.48929	0.00164642	-2.78346
BACH2	-2.32326	0.0201653	-2.64625	0.00813907	-3.51397	0.00159447	-2.79738
ZBTB44	-1.8519	0.0640402	-3.04787	0.00230473	-3.46466	0.00144954	-2.83877
MLL	-2.72705	0.00639037	-2.29994	0.0214518	-3.55462	0.00135644	-2.8676
ARNT	-2.22005	0.0264156	-2.8384	0.00453396	-3.57687	0.00120126	-2.92036
ZNF521	-0.386671	0.699	-3.79099	0.000150048	-2.95405	0.00106589	-2.97229
SUPT6H	-2.7633	0.00572193	-2.36815	0.0178775	-3.62848	0.00104214	-2.98208
PRDM2	-2.40688	0.0160894	-2.72989	0.0063355	-3.63225	0.00103883	-2.98345
HOXC8	-2.45279	0.0141751	-2.70255	0.00688094	-3.64538	0.000998328	-3.00073
PKNOX2	-3.28138	0.00103302	-1.70151	0.0888482	-3.52343	0.000944996	-3.02457
KLF7	-2.59076	0.00957638	-2.63682	0.00836876	-3.69646	0.000836022	-3.07778
ZNF25	-2.64451	0.00818081	-2.62401	0.00869008	-3.72541	0.000750129	-3.12486
ANKZF1	-3.17374	0.00150486	-1.99081	0.0465014	-3.65189	0.000739483	-3.13107
PBX1	-2.93404	0.00334583	-2.38947	0.0168725	-3.76429	0.000608678	-3.21561
SOX4	-2.69228	0.00709644	-2.65776	0.00786623	-3.78305	0.000602508	-3.22004
HINFP	-2.65124	0.00801972	-2.7683	0.005635	-3.83219	0.000497311	-3.30337
BHLHE41	-2.51446	0.0119214	-2.9444	0.00323587	-3.86	0.000430619	-3.36591
CSRNP3	-2.51906	0.0117669	-2.94513	0.0032282	-3.86376	0.00042462	-3.372
TFEB	-1.78239	0.0746852	-3.47881	0.000503648	-3.72023	0.000420841	-3.37588
ZNF624	-2.20746	0.027282	-3.21502	0.00130434	-3.83427	0.000400103	-3.39783
LASS5	-2.84311	0.00446758	-2.69782	0.00697956	-3.91803	0.000354714	-3.45012
ZZEF1	-3.14616	0.00165429	-2.41253	0.0158421	-3.93059	0.000302682	-3.51901
ATF7	-2.79794	0.00514296	-2.8064	0.00500986	-3.96287	0.000298016	-3.52576
POU4F2	-2.77214	0.00556895	-2.9154	0.00355236	-4.02169	0.000234045	-3.6307
ZHX2	-2.01261	0.0441555	-3.53729	0.000404248	-3.92438	0.000213011	-3.6716
CITED2	-2.86006	0.00423558	-3.02107	0.00251886	-4.15859	0.000132807	-3.87678
SMAD1	-3.1001	0.00193458	-2.84663	0.00441844	-4.20497	0.0001083	-3.96537
SMAD9	-3.14298	0.00167238	-2.91516	0.00355508	-4.28375	7.74862e-05	-4.11078
RERE	-3.48739	0.000487753	-2.56522	0.010311	-4.27984	6.6387e-05	-4.17792
SOX6	-2.77139	0.00558172	-3.32427	0.000886516	-4.31028	6.53989e-05	-4.18443
TCF7L2	-3.16397	0.00155631	-2.96137	0.00306271	-4.33127	6.31749e-05	-4.19946
NCOR1	-3.00728	0.00263593	-3.14401	0.00166652	-4.34962	5.85807e-05	-4.23225
TSHZ2	-2.74457	0.00605911	-3.43081	0.000601774	-4.36665	4.93035e-05	-4.30712
ZDHHC14	-4.21812	2.46343e-05	-1.52025	0.128449	-4.05764	4.32349e-05	-4.36417
ZFAND2B	-2.8035	0.00505506	-3.50577	0.000455284	-4.46133	3.21793e-05	-4.49242
HMBOX1	-3.63132	0.000281973	-2.70416	0.00684769	-4.47986	2.73363e-05	-4.56326
TFAP2B	-2.72965	0.00634025	-3.6558	0.000256378	-4.51519	2.32929e-05	-4.63278
CAMTA1	-3.11799	0.00182089	-3.32353	0.000888867	-4.55484	2.32e-05	-4.63451
TBX19	-3.9264	8.62258e-05	-2.55752	0.0105422	-4.58482	1.35541e-05	-4.86793
ZBTB20	-3.14445	0.00166399	-3.48245	0.000496855	-4.68592	1.24062e-05	-4.90636
L3MBTL4	-3.40762	0.000655328	-3.27227	0.00106689	-4.72339	1.06087e-05	-4.97434
TRIM16	-2.38498	0.0170799	-4.12469	3.7123e-05	-4.60304	9.68276e-06	-5.014
CHD5	-3.00937	0.00261791	-3.79136	0.000149825	-4.80884	6.17814e-06	-5.20914
CREB5	-3.22827	0.00124541	-3.62686	0.00028689	-4.84731	5.66125e-06	-5.24709
HIVEP2	-2.92355	0.0034607	-3.88625	0.000101806	-4.81525	5.58733e-06	-5.2528
SCML4	-2.9058	0.00366317	-3.98834	6.65375e-05	-4.87489	3.95518e-06	-5.40283
ZBTB4	-3.53955	0.000400808	-3.50029	0.000464759	-4.97792	3.07286e-06	-5.51246
ZBTB16	-3.31041	0.000931578	-3.7218	0.000197806	-4.97253	3.04174e-06	-5.51688
KCNH8	-3.34321	0.000828144	-3.94702	7.91311e-05	-5.15497	1.14948e-06	-5.9395
AFF3	-3.24424	0.00117763	-4.18774	2.81741e-05	-5.25521	6.04562e-07	-6.21856
BAZ2B	-3.83769	0.000124199	-3.6693	0.000243216	-5.30824	5.53249e-07	-6.25708
RORB	-2.73533	0.00623174	-4.6396	3.49079e-06	-5.21487	4.05564e-07	-6.39194
HOXC9	-3.81831	0.000134369	-3.83684	0.000124629	-5.41301	3.16592e-07	-6.4995
ZEB2	-3.49891	0.000467163	-4.30847	1.64385e-05	-5.52065	1.51168e-07	-6.82054

## Sheet: MYCNA-marina
	TAR-nes	TAR-p.val	NRC-nes	NRC-p.val	stoufer-nes	fishers-p.val	logP*sign(nes)
E2F3	3.98623	6.71327e-05	3.918	8.9288e-05	5.58913	1.19478e-07	6.92271
TCF3	3.05701	0.00223556	4.65912	3.17565e-06	5.45613	1.40306e-07	6.85292
PRDM8	3.6967	0.000218422	3.98887	6.63879e-05	5.43452	2.76223e-07	6.55874
TRIM28	3.47304	0.000514596	4.14138	3.4522e-05	5.38421	3.34798e-07	6.47522
ZNF581	3.67041	0.000242158	3.94362	8.02624e-05	5.38393	3.64547e-07	6.43825
MYCN	3.37848	0.000728877	4.17634	2.96239e-05	5.34206	4.02715e-07	6.395
TP53	3.40918	0.000651582	4.12736	3.66957e-05	5.32914	4.43511e-07	6.3531
UHRF1	3.53709	0.000404567	3.98888	6.63862e-05	5.32166	4.9506e-07	6.30534
TFAP4	3.70698	0.00020975	3.74649	0.000179325	5.2704	6.80649e-07	6.16708
ECSIT	3.64294	0.000269542	3.80137	0.000143898	5.26392	7.00686e-07	6.15448
ZNF695	3.51479	0.000440105	3.8725	0.000107725	5.2236	8.46958e-07	6.07214
ZNF239	3.25342	0.00114025	4.04766	5.17328e-05	5.16264	1.04091e-06	5.98259
ZNF8	3.98138	6.85151e-05	3.30413	0.0009527	5.15164	1.14522e-06	5.94111
E2F1	3.89581	9.78715e-05	3.25342	0.00114024	5.05527	1.89808e-06	5.72169
HNRNPAB	3.29665	0.000978461	3.85069	0.000117785	5.05393	1.95647e-06	5.70853
RCOR2	2.79306	0.00522114	4.22855	2.35206e-05	4.96503	2.07695e-06	5.68257
NME2	2.91894	0.00351228	4.1309	3.61341e-05	4.98499	2.14227e-06	5.66913
MYB	2.32157	0.020256	4.37661	1.20537e-05	4.73633	3.96161e-06	5.40213
TAF1D	3.23794	0.00120397	3.69848	0.000216896	4.90479	4.2195e-06	5.37474
ZNF219	2.64729	0.00811387	4.13617	3.53151e-05	4.79663	4.60341e-06	5.33692
HMGB2	3.44597	0.000569018	3.44402	0.000573134	4.87196	5.19711e-06	5.28424
MYBL2	3.13366	0.00172639	3.71047	0.000206876	4.83953	5.65906e-06	5.24726
PTTG1	2.91185	0.00359291	3.86411	0.000111494	4.79133	6.30137e-06	5.20056
ELK1	3.58221	0.000340698	3.22133	0.00127596	4.81083	6.80272e-06	5.16732
TEAD4	3.83148	0.000127374	2.90666	0.00365309	4.76459	7.24976e-06	5.13968
TWIST1	3.43271	0.000597584	3.33638	0.000848758	4.78647	7.8588e-06	5.10464
ZNF114	3.35924	0.000781563	3.39453	0.000687458	4.77564	8.29402e-06	5.08123
CREB3L4	3.35278	0.000800032	3.38383	0.000714833	4.7635	8.79241e-06	5.05589
CITED1	3.28802	0.00100896	3.40449	0.000662883	4.73231	1.0178e-05	4.99234
DLX6	2.05285	0.0400869	4.2922	1.76908e-05	4.48663	1.07504e-05	4.96858
ZNF530	3.44971	0.000561192	3.19113	0.00141717	4.69578	1.1965e-05	4.92209
DLX5	3.18409	0.0014521	3.391	0.000696391	4.64929	1.49706e-05	4.82476
HOXD10	3.18182	0.00146351	3.31002	0.000932898	4.59043	1.98025e-05	4.70328
ZNF556	2.5148	0.0119101	3.77376	0.000160803	4.44668	2.71299e-05	4.56655
NFIB	3.01619	0.00255975	3.35512	0.000793311	4.50519	2.8647e-05	4.54292
ZNF169	2.27175	0.0231016	3.90458	9.439e-05	4.36732	3.06061e-05	4.51419
ZNF560	3.57385	0.000351775	2.73085	0.00631721	4.45809	3.1149e-05	4.50656
HOXD9	3.04209	0.00234941	3.29105	0.000998143	4.47821	3.27443e-05	4.48486
BAZ1A	3.44416	0.000572847	2.80023	0.00510664	4.41545	4.02001e-05	4.39577
TBL1X	2.83325	0.00460773	3.41616	0.00063511	4.419	4.02141e-05	4.39562
SCRT2	2.90563	0.00366515	3.34415	0.000825337	4.41926	4.14683e-05	4.38228
ZNF496	2.85187	0.00434626	3.36087	0.000776968	4.39307	4.5921e-05	4.33799
ZNF124	3.26027	0.00111305	2.9306	0.00338309	4.37761	5.0796e-05	4.29417
ZNF667	2.91223	0.00358857	3.27098	0.00107177	4.37219	5.18011e-05	4.28566
ZNF121	3.63573	0.000277194	2.459	0.0139325	4.30962	5.19993e-05	4.284
ZNF77	2.68154	0.00732836	3.41299	0.000642539	4.30949	6.24668e-05	4.20435
ASCL1	2.45087	0.0142512	3.56704	0.000361042	4.2553	6.78017e-05	4.16876
ZNF536	3.33192	0.000862493	2.74845	0.00598769	4.29947	6.80337e-05	4.16728
NFYA	2.96007	0.00307574	3.08712	0.00202104	4.27601	8.07379e-05	4.09292
ILF3	3.14154	0.00168063	2.86801	0.00413057	4.24939	8.93983e-05	4.04867
PCGF6	3.51939	0.000432542	2.38806	0.0169376	4.1772	9.39517e-05	4.0271
HOXD8	3.2983	0.000972726	2.67066	0.00757025	4.22069	9.43959e-05	4.02505
CCRN4L	2.41984	0.0155272	3.49029	0.000482492	4.1791	9.59075e-05	4.01815
HDGF	3.29631	0.00097963	2.65255	0.00798857	4.20648	9.98428e-05	4.00068
SCML2	2.22314	0.0262067	3.61113	0.000304871	4.12545	0.000101767	3.99239
ZNF491	3.28422	0.00102265	2.65587	0.0079105	4.20027	0.000102941	3.98741
TGIF2	3.07456	0.00210812	2.88684	0.00389133	4.21535	0.000104273	3.98183
ZNF135	3.38798	0.000704083	2.46157	0.013833	4.13626	0.000122128	3.91319
GATAD2A	2.44631	0.0144327	3.36568	0.000763547	4.1097	0.000136822	3.86384
ZNF616	2.91449	0.00356274	2.92441	0.00345108	4.12872	0.00015131	3.82013
IRX5	2.54327	0.0109819	3.22335	0.00126702	4.07762	0.000169512	3.7708
NHLH2	2.89418	0.00380155	2.85639	0.00428495	4.06626	0.00019588	3.70801
ZNF227	2.80705	0.00499969	2.90018	0.0037295	4.03562	0.000221702	3.65423
PA2G4	2.72438	0.00644216	2.96112	0.00306523	4.02026	0.000233653	3.63143
MAZ	2.95712	0.00310527	2.71398	0.00664802	4.01007	0.000243352	3.61376
NR2F1	3.35395	0.00079666	2.22056	0.0263811	3.94177	0.000247371	3.60665
E2F8	2.8371	0.00455253	2.81446	0.00488599	3.99625	0.00026055	3.58411
ZNF57	2.9214	0.00348462	2.6281	0.00858626	3.92409	0.000341595	3.46649
PRKDC	2.76851	0.00563139	2.76637	0.00566842	3.91375	0.000362376	3.44084
ZNF649	2.51864	0.0117808	2.9674	0.00300334	3.87922	0.00039802	3.40009
SOX11	1.72115	0.0852237	3.52552	0.000422651	3.70996	0.000404555	3.39302
ZNF256	3.05567	0.00224562	2.37289	0.0176494	3.83857	0.000441355	3.35521
ZNF492	3.23633	0.00121078	2.11435	0.034485	3.7835	0.000462788	3.33462
ZNF682	2.83421	0.00459385	2.55096	0.0107425	3.8079	0.000538728	3.26863
ETV4	2.58225	0.00981571	2.78774	0.00530774	3.79716	0.000565921	3.24724
ATAD2	3.03523	0.00240353	2.28628	0.0222378	3.76288	0.000579216	3.23716
NFXL1	2.7393	0.00615701	2.6038	0.00921967	3.77814	0.000611739	3.21343
ZNF473	3.26538	0.00109315	1.94068	0.0522972	3.68124	0.000615681	3.21064
FOXM1	2.8172	0.00484442	2.50833	0.0121302	3.76572	0.000631242	3.1998
ZNF639	3.18512	0.00144693	2.04095	0.0412553	3.69539	0.000640292	3.19362
ZMYND19	2.75522	0.00586521	2.50358	0.0122946	3.71853	0.000759848	3.11927
MRRF	1.99408	0.0461438	3.15571	0.00160109	3.64145	0.00077671	3.10974
HMGA1	2.35232	0.0186565	2.86782	0.00413314	3.6912	0.000807362	3.09293
ZNF331	2.14854	0.0316711	3.02408	0.00249389	3.65759	0.000825089	3.0835
NR6A1	1.9979	0.0457279	3.13074	0.00174367	3.62649	0.000832171	3.07979
E2F7	2.97788	0.00290254	2.15667	0.0310312	3.63067	0.000929058	3.03196
MTA1	2.69094	0.00712516	2.4657	0.0136747	3.64629	0.000997369	3.00114
CBX2	2.62387	0.00869367	2.52176	0.011677	3.63851	0.00103499	2.98506
ILF2	3.01983	0.00252914	2.04522	0.040833	3.58153	0.00105112	2.97835
ZNF511	3.00953	0.00261648	2.03704	0.0416458	3.56847	0.00110322	2.95734
ZNF620	2.64781	0.0081014	2.46461	0.0137164	3.61503	0.00112288	2.94967
ZNF443	2.63383	0.00844272	2.47353	0.0133784	3.61145	0.00113951	2.94328
ZNF367	2.79321	0.00521885	2.28074	0.0225636	3.58782	0.00118308	2.92699
ZNF259	1.91954	0.0549166	3.05678	0.00223726	3.51879	0.00122917	2.91039
HOXD4	1.6398	0.101047	3.22964	0.00123947	3.44321	0.0012506	2.90288
ZDHHC9	2.2133	0.0268768	2.81383	0.00489544	3.55472	0.00130731	2.88362
WHSC1	2.62639	0.00862968	2.42387	0.015356	3.57107	0.00131574	2.88083
ZDHHC22	1.99195	0.0463761	2.97959	0.00288636	3.51541	0.0013277	2.8769
NOLC1	2.84742	0.00440757	2.1652	0.0303727	3.54445	0.00132781	2.87686
ZDHHC23	2.95963	0.00308007	1.98176	0.0475056	3.4941	0.00143829	2.84215
TOP2A	2.81879	0.00482055	2.1586	0.0308812	3.51954	0.00146073	2.83543
TBX2	2.36084	0.0182335	2.61517	0.0089182	3.51857	0.00158125	2.801
ZNF93	2.96939	0.00298395	1.89151	0.0585565	3.43717	0.00168653	2.773
ZNF167	1.98473	0.0471741	2.86563	0.00416175	3.42973	0.00187212	2.72767
ZNF333	2.67154	0.00755037	2.19078	0.0284676	3.43818	0.00203015	2.69247
ETV1	2.12414	0.0336582	2.71345	0.00665857	3.4207	0.00210743	2.67625
ZNF263	3.01579	0.00256308	1.67998	0.0929608	3.32041	0.00222591	2.65249
SCML1	2.04943	0.0404206	2.74315	0.00608521	3.38887	0.00229004	2.64016
ATF5	2.17545	0.0295966	2.5793	0.0099002	3.36211	0.00267676	2.57239
RFXANK	2.06085	0.0393178	2.65912	0.00783446	3.33752	0.00279858	2.55306
HES6	2.3681	0.0178797	2.36875	0.0178483	3.34946	0.00288804	2.5394
ZFP112	2.0962	0.0360645	2.60169	0.00927654	3.32191	0.00301189	2.52116
ZNF146	2.362	0.0181768	2.35669	0.0184388	3.33661	0.00301674	2.52046
ZNF43	2.79549	0.00518208	1.83344	0.0667375	3.27315	0.00310202	2.50836
ZFP82	2.94789	0.00319948	1.56018	0.118717	3.18769	0.00337131	2.4722
HOXD3	1.48768	0.136835	2.99049	0.00278527	3.16655	0.00338147	2.47089
FEV	2.1418	0.0322095	2.48648	0.0129015	3.27269	0.003651	2.43759
ZNF85	2.68583	0.007235	1.89073	0.0586598	3.23612	0.00371983	2.42948
ZNF330	1.82049	0.0686844	2.6905	0.00713453	3.18975	0.00422458	2.37422
CEBPZ	2.64767	0.00810495	1.82532	0.0679533	3.16288	0.00468377	2.3294
ZNF74	2.2529	0.0242655	2.24263	0.0249209	3.17882	0.00508613	2.29361
SIX4	1.52592	0.12703	2.82141	0.00478125	3.07403	0.00510572	2.29194
ZNF776	2.32947	0.0198344	2.08351	0.0372048	3.12045	0.00605966	2.21755
BCL11A	2.75836	0.00580924	1.5041	0.132557	3.01401	0.00629061	2.20131
YY1	2.39671	0.0165431	1.98607	0.047026	3.09909	0.00634723	2.19742
MZF1	1.21381	0.224821	2.92057	0.00349387	2.92345	0.00640115	2.19374
TCF19	2.55585	0.010593	1.76783	0.0770893	3.0573	0.00662298	2.17895
ZNF519	2.49023	0.012766	1.83389	0.0666706	3.05761	0.00686765	2.16319
ZNF480	2.76063	0.00576894	1.41795	0.156205	2.95471	0.00721977	2.14148
SIX2	1.41735	0.156381	2.74012	0.00614173	2.93977	0.00763377	2.11726
ZNF516	1.39432	0.163221	2.74768	0.00600189	2.92883	0.00776688	2.10975
TFAM	2.58007	0.00987812	1.60276	0.108988	2.9577	0.00843402	2.07397
ZCCHC4	2.57324	0.010075	1.58473	0.113028	2.94013	0.00885703	2.05271
ZNF280C	2.4496	0.0143016	1.7493	0.0802386	2.96907	0.00891654	2.0498
SOHLH2	2.6186	0.00882922	1.49651	0.134521	2.90982	0.00918784	2.03679
ZNF562	2.67334	0.00751007	1.37107	0.170352	2.85983	0.00980165	2.0087
ZNF460	2.01637	0.0437609	2.17669	0.0295038	2.96494	0.0098799	2.00525
TAF5	2.52849	0.0114555	1.56249	0.118172	2.89276	0.0102949	1.98738
ZC4H2	1.66176	0.0965617	2.41189	0.0158701	2.8805	0.011464	1.94066
ZNF502	2.32833	0.0198944	1.76411	0.0777128	2.8938	0.0115522	1.93734
ZNF660	1.84849	0.0645314	2.20083	0.0277478	2.86331	0.0131165	1.88218
PRDM5	1.83156	0.0670174	2.19868	0.027901	2.84981	0.0136161	1.86595
ZNF503	1.68919	0.0911823	2.30038	0.0214266	2.82106	0.0141411	1.84952
E2F2	2.10511	0.0352821	1.91105	0.0559976	2.83985	0.0142781	1.84533
TAF7	2.12122	0.0339035	1.88952	0.0588218	2.83602	0.0143936	1.84183
UBP1	1.43793	0.150454	2.46333	0.0137651	2.75861	0.0148693	1.82771
ZBED3	2.02732	0.0426294	1.94643	0.0516035	2.80987	0.0156614	1.80517
ZBED4	2.37133	0.017724	1.53176	0.125582	2.7599	0.0158203	1.80079
CEBPG	2.29516	0.0217238	1.62563	0.104028	2.77242	0.0160281	1.79512
PRDM15	2.42669	0.0152374	1.43243	0.152021	2.72881	0.0163717	1.78591
YY2	2.35306	0.0186199	1.53053	0.125885	2.74611	0.0165388	1.7815
ZRANB3	2.3609	0.0182306	1.49688	0.134424	2.72786	0.0171824	1.76492
ZNF202	1.37608	0.168796	2.43887	0.0147331	2.69758	0.0174001	1.75945
RBL1	2.33814	0.0193799	1.44784	0.147661	2.6771	0.0196205	1.70729
ZNF141	2.37227	0.0176791	1.36996	0.170699	2.64616	0.0205309	1.68759
TLX3	1.82829	0.0675056	1.99665	0.0458632	2.70464	0.0209837	1.67812
ZNF107	2.15102	0.0314745	1.64457	0.100058	2.68389	0.021291	1.6718
VAX2	1.66362	0.0961879	2.12863	0.0332848	2.68153	0.0215919	1.66571
SOX12	1.93354	0.0531695	1.86235	0.0625532	2.6841	0.0223037	1.65162
SMARCA4	1.81197	0.0699906	1.97801	0.0479279	2.67992	0.0224666	1.64846
CNBP	2.17773	0.0294259	1.54438	0.122497	2.63193	0.0238823	1.62192
IRX3	2.3244	0.0201043	1.32034	0.186722	2.57722	0.0247194	1.60696
ZNF497	2.52297	0.0116367	0.986322	0.323975	2.48145	0.0248091	1.60539
PHF5A	1.78633	0.0740454	1.95037	0.0511319	2.64225	0.0248989	1.60382
ZNF395	1.5675	0.116998	2.12231	0.0338114	2.60909	0.0258418	1.58768
GCFC1	2.1296	0.033205	1.54915	0.121346	2.60126	0.0262475	1.58091
ZNF598	1.78378	0.0744587	1.90517	0.0567584	2.60848	0.0273283	1.56339
NFATC4	1.89509	0.058081	1.73828	0.0821615	2.56918	0.0302784	1.51887
DNMT3B	2.00325	0.0451505	1.61123	0.107129	2.55582	0.030625	1.51392
ZNF276	1.92683	0.054001	1.69274	0.0905048	2.55942	0.0308934	1.51013
SNAPC4	1.69662	0.0897687	1.90716	0.0564994	2.54826	0.0318719	1.49659
ZNF274	2.59405	0.00948535	0.608283	0.543	2.26439	0.032287	1.49097
KLF16	1.71749	0.0858894	1.87639	0.0606019	2.54126	0.0325739	1.48713
UBN1	1.68037	0.0928862	1.90346	0.0569808	2.53415	0.0330341	1.48104
ZNF526	2.03222	0.0421312	1.52735	0.126673	2.517	0.0332655	1.47801
ENO1	1.51398	0.130031	2.03805	0.0415446	2.51167	0.0336063	1.47358
ZNF317	1.90576	0.0566812	1.65371	0.098187	2.51692	0.0344562	1.46273
CTCF	2.25401	0.0241957	1.18346	0.236626	2.43066	0.0352844	1.45242
ZSCAN22	2.21114	0.027026	1.24686	0.212448	2.44518	0.0353685	1.45138
ZNF573	1.76071	0.0782874	1.74698	0.0806412	2.48031	0.0382902	1.41691
ZNF619	1.48038	0.138771	1.9984	0.0456738	2.45987	0.0384169	1.41548
ZNF565	1.83377	0.0666885	1.65395	0.0981375	2.46619	0.0394583	1.40386
SOLH	2.00076	0.0454185	1.44318	0.14897	2.43523	0.0405678	1.39182
SATB2	1.61444	0.106432	1.83755	0.0661286	2.44093	0.0419224	1.37755
ZNF785	1.64892	0.0991644	1.75923	0.0785384	2.40992	0.0456011	1.34102
ZNF768	1.87684	0.0605395	1.51431	0.129948	2.39791	0.0459832	1.3374
ZNF32	2.18058	0.0292145	1.09324	0.274289	2.31494	0.0466903	1.33077
ZBTB33	2.01691	0.0437048	1.32733	0.184399	2.36474	0.0469116	1.32872
ZNF195	1.53648	0.124422	1.8415	0.0655478	2.38859	0.0473762	1.32444
ZNF324B	1.63285	0.1025	1.7427	0.0813863	2.38688	0.0482709	1.31631
ESRRA	1.59665	0.110343	1.77155	0.0764691	2.38168	0.0487286	1.31222
ZNF689	2.17427	0.0296851	1.06907	0.285039	2.29338	0.0488414	1.31121
RBPJ	1.39605	0.1627	1.92591	0.0541155	2.34898	0.0504723	1.29695
ZNF426	2.16014	0.0307615	1.04468	0.296173	2.26615	0.0519156	1.2847
RRN3	1.8051	0.071059	1.51515	0.129735	2.34777	0.052423	1.28048
MXD3	1.48205	0.138328	1.83293	0.0668136	2.34404	0.0525323	1.27957
ZNF7	1.64888	0.099173	1.67795	0.0933567	2.35242	0.0526086	1.27894
HKR1	0.852837	0.39375	2.26276	0.0236504	2.20306	0.0528607	1.27687
HLTF	1.83516	0.0664827	1.47541	0.140103	2.34092	0.0528704	1.27679
ZNF677	2.15143	0.0314425	1.00934	0.312814	2.235	0.0552934	1.25733
SIX3	1.10199	0.270467	2.04687	0.0406708	2.22658	0.0606089	1.21746
ZNF414	1.67152	0.0946183	1.56172	0.118353	2.28625	0.0615012	1.21112
ZNF566	1.96571	0.0493318	1.2058	0.227896	2.2426	0.0616995	1.20972
E2F5	2.11456	0.0344679	0.980029	0.327072	2.1882	0.0618384	1.20874
ZNF764	2.14164	0.0322222	0.932153	0.351258	2.1735	0.0620394	1.20733
ZNF295	1.64726	0.0995041	1.57059	0.116279	2.27536	0.0631655	1.19952
ZNF646	1.73395	0.0829268	1.47349	0.140618	2.26801	0.0635701	1.19675
FIZ1	1.79654	0.0724089	1.39111	0.164192	2.25401	0.0645825	1.18989
NFYC	1.3011	0.193225	1.86158	0.0626618	2.23635	0.0655506	1.18342
SMAD3	1.3139	0.188881	1.84203	0.0654704	2.23158	0.0666878	1.17595
ZNF561	2.01403	0.0440066	1.07054	0.284378	2.18112	0.0673389	1.17173
ADNP2	1.89519	0.0580667	1.23803	0.215704	2.21553	0.0673858	1.17143
PLAGL2	1.42154	0.155159	1.7394	0.0819648	2.23512	0.0682267	1.16605
ZNF22	2.19056	0.0284833	0.726815	0.467339	2.0629	0.070805	1.14994
ZNF595	1.74741	0.0805666	1.37963	0.1677	2.21115	0.0716657	1.14469
ZNF528	1.26096	0.207324	1.83315	0.0667804	2.18786	0.0731	1.13608
ZNF428	2.10609	0.0351968	0.852318	0.394038	2.09191	0.0732015	1.13548
BRPF1	1.34601	0.1783	1.74024	0.0818163	2.18231	0.076259	1.11771
HSF4	0.85247	0.393953	2.07637	0.0378594	2.07101	0.0776377	1.10993
MTA2	1.71676	0.0860239	1.3206	0.186634	2.14774	0.0823901	1.08412
NAT14	1.4535	0.146084	1.58204	0.11364	2.14646	0.0846366	1.07244
ZNF177	1.54277	0.122886	1.49093	0.13598	2.14515	0.0850835	1.07015
ZFP64	1.86293	0.0624721	1.10665	0.268444	2.09981	0.0853296	1.0689
ZMAT4	0.502949	0.615	2.20656	0.027345	1.91591	0.0855212	1.06793
ZGLP1	1.66246	0.0964213	1.34732	0.177877	2.12823	0.0868824	1.06107
TADA3	1.20948	0.226478	1.76371	0.0777802	2.10237	0.0887641	1.05176
ZNF610	1.22104	0.222072	1.74003	0.0818532	2.09379	0.0910243	1.04084
ZNF434	1.66975	0.0949681	1.30128	0.193163	2.10084	0.0916929	1.03766
TAF10	1.49574	0.134722	1.43063	0.152537	2.06925	0.100385	0.998332
ZNF557	1.90774	0.0564248	0.871407	0.383532	1.96515	0.104593	0.980496
FERD3L	1.99095	0.046486	0.707143	0.479478	1.90784	0.107069	0.970337
ZNF576	1.31706	0.187818	1.55743	0.119369	2.03257	0.107565	0.968328
TLX2	0.769706	0.441474	1.95165	0.0509798	1.92429	0.107894	0.967002
ZNF48	1.70742	0.0877449	1.13436	0.256643	2.00944	0.107943	0.966806
CTBP1	1.20039	0.229986	1.65482	0.097961	2.01894	0.107983	0.966644
ZNF358	1.73854	0.0821158	1.07502	0.282364	1.98949	0.110465	0.956776
ZNF35	1.50208	0.133076	1.35669	0.174879	2.02146	0.110787	0.95551
ZNF607	1.4111	0.158215	1.44647	0.148044	2.02061	0.111353	0.953297
ZNF253	1.83494	0.0665141	0.928987	0.352896	1.95439	0.11154	0.95257
ZNF574	1.48912	0.136457	1.36077	0.173586	2.01518	0.112343	0.949453
MRPL28	1.65894	0.0971277	1.1238	0.261099	1.96769	0.118547	0.926109
ZNF420	1.72679	0.0842053	1.03172	0.302205	1.95056	0.118868	0.924935
ZNF180	1.99741	0.0457804	0.566579	0.571	1.81302	0.121404	0.915768
ZNF577	1.08616	0.277408	1.67132	0.0946576	1.94984	0.121834	0.914231
SCAND1	1.33639	0.181422	1.42306	0.154719	1.95122	0.128364	0.891558
THAP7	1.676	0.0937389	1.0362	0.30011	1.91781	0.128587	0.890803
ZNF230	1.98361	0.047299	0.502949	0.615	1.75826	0.131988	0.879466
ZNF558	1.74467	0.0810425	0.915613	0.35987	1.8811	0.132256	0.878584
ZNF350	1.30541	0.191752	1.39987	0.161553	1.91292	0.138611	0.858202
ZNF174	1.94204	0.0521318	0.511501	0.609	1.73492	0.141277	0.849928
ZNF71	1.56177	0.118342	1.09845	0.27201	1.88106	0.142798	0.845277
ZNF584	1.61153	0.107065	1.03448	0.300911	1.87101	0.142891	0.844997
ZNF747	1.69117	0.0908042	0.918824	0.358188	1.84555	0.143947	0.841797
ZNF618	1.3665	0.171781	1.31216	0.189465	1.8941	0.144021	0.841574
ZNF100	1.50303	0.13283	1.15974	0.246157	1.88286	0.144536	0.840024
ZNF700	1.61718	0.10584	1.01099	0.312019	1.8584	0.145654	0.836678
ZNF200	1.34107	0.179899	1.32791	0.184206	1.88725	0.146043	0.835518
SRF	1.07223	0.283615	1.56582	0.11739	1.86539	0.146572	0.83395
ZBTB26	1.59661	0.110353	1.01613	0.309569	1.84748	0.149514	0.825318
ZNF664	1.84835	0.0645512	0.618873	0.536	1.74459	0.150989	0.821054
ZNF787	1.63005	0.103092	0.949275	0.342481	1.82386	0.153362	0.814282
ARNTL2	1.78386	0.0744466	0.691615	0.489179	1.75042	0.157059	0.803938
ZNF234	1.41809	0.156164	1.18722	0.23514	1.84223	0.15806	0.801178
ZC3H14	1.43772	0.150512	1.15032	0.250011	1.83003	0.161054	0.793029
ZNF569	1.63297	0.102475	0.888005	0.374538	1.7826	0.16351	0.786457
CREBZF	0.749752	0.453404	1.72363	0.0847752	1.74894	0.163694	0.785966
ZSCAN29	1.60429	0.108651	0.924698	0.355123	1.78826	0.164173	0.784697
NFYB	1.84074	0.06566	0.538836	0.59	1.68261	0.164677	0.783366
HSF1	1.48867	0.136575	1.05178	0.2929	1.79637	0.168764	0.77272
RNF4	1.46541	0.14281	1.07611	0.281876	1.79713	0.169574	0.770641
ZCCHC7	1.26689	0.205194	1.25198	0.210577	1.78111	0.178959	0.747246
YEATS4	1.74061	0.0817525	0.624956	0.532	1.67271	0.179848	0.745094
ZNF134	1.59802	0.110039	0.844619	0.398324	1.72721	0.180909	0.74254
ZNF792	1.55588	0.119737	0.900135	0.368048	1.73666	0.181652	0.740759
TAF5L	1.08454	0.278127	1.39692	0.162436	1.75466	0.1851	0.732593
ZNF205	1.4927	0.135517	0.963548	0.335273	1.73683	0.185896	0.73073
ZMAT3	0.553385	0.58	1.74659	0.0807087	1.62633	0.190129	0.720951
ZCCHC3	1.45325	0.146154	0.972263	0.33092	1.7151	0.194862	0.710273
THAP11	1.31427	0.188754	1.12363	0.261172	1.72386	0.197676	0.704046
PSMC3IP	1.3845	0.166206	1.04246	0.297198	1.71612	0.197974	0.703392
ATF4	1.62182	0.104841	0.713829	0.475333	1.65156	0.19929	0.700515
ZBTB39	1.16829	0.24269	1.25461	0.209622	1.71325	0.202394	0.693801
ZNF416	1.44712	0.147862	0.943476	0.345438	1.69041	0.203002	0.6925
ZNF408	1.22707	0.219797	1.1815	0.237403	1.70312	0.206272	0.68556
ZC3H18	0.515792	0.606	1.71264	0.0867783	1.57574	0.207473	0.683039
ZSCAN2	1.38117	0.167227	1.00086	0.316893	1.68435	0.208665	0.680551
ZBTB45	1.43249	0.152002	0.926729	0.354067	1.66822	0.211085	0.675542
PBX3	1.04768	0.294787	1.33167	0.182969	1.68245	0.21143	0.674834
E4F1	0.881646	0.377968	1.43978	0.14993	1.6415	0.219338	0.658886
C11orf9	1.07441	0.282638	1.26925	0.204351	1.65722	0.222452	0.652763
ZNF621	0.802146	0.422469	1.48809	0.136727	1.61944	0.222468	0.652733
LHX2	1.37656	0.168647	0.939789	0.347326	1.63791	0.22478	0.648242
ZNF430	1.83928	0.0658738	0.119348	0.905	1.38496	0.227722	0.642594
ZNF26	1.2995	0.193771	1.01812	0.30862	1.63881	0.228247	0.641596
ZNF670	1.28514	0.198744	1.02753	0.304172	1.6353	0.230076	0.63813
GABPB1	1.82928	0.0673579	0.12061	0.904	1.37878	0.231306	0.635812
AATF	0.786577	0.43153	1.4648	0.142975	1.59197	0.233558	0.631606
ZNF614	1.45133	0.146689	0.794126	0.427122	1.58777	0.236214	0.626695
LZTFL1	0.978794	0.327682	1.25381	0.209912	1.57869	0.252905	0.597043
HCFC1	0.974901	0.329609	1.25311	0.210167	1.57544	0.254211	0.594805
ZNF781	1.28689	0.198132	0.929967	0.352388	1.56756	0.255668	0.592324
EDF1	1.26108	0.207279	0.942237	0.346071	1.55798	0.260736	0.583798
E2F4	1.1009	0.270942	1.09844	0.272015	1.55516	0.265892	0.575295
ZSCAN12	1.3049	0.191925	0.867227	0.385818	1.53593	0.266799	0.573816
INSM1	0.867328	0.385762	1.30426	0.192143	1.53555	0.26699	0.573505
NFATC3	1.39371	0.163406	0.745846	0.45576	1.51289	0.267906	0.572017
ZBTB5	1.58287	0.113452	0.437154	0.662	1.42837	0.269542	0.569374
ZNF697	1.42299	0.15474	0.697512	0.485483	1.49942	0.26959	0.569296
ZMYM3	0.910146	0.362746	1.25983	0.207731	1.5344	0.270185	0.568338
CGGBP1	1.41342	0.157531	0.694475	0.487384	1.49051	0.273855	0.562479
ATF1	1.50236	0.133004	0.511501	0.609	1.42402	0.284576	0.545802
FOXN4	0.830373	0.406328	1.27825	0.201161	1.49102	0.286427	0.542986
ZNF14	1.27117	0.203668	0.83795	0.402059	1.49137	0.286801	0.542419
DNMT3A	0.553385	0.58	1.46274	0.143537	1.42562	0.290206	0.537294
ZNF567	1.43542	0.151167	0.585815	0.558	1.42923	0.292932	0.533233
ZNF281	1.14489	0.252253	0.949506	0.342363	1.48096	0.297881	0.525957
GTF2H4	0.40293	0.687	1.52674	0.126827	1.36448	0.299758	0.523229
TSC22D2	0.570999	0.568	1.42144	0.155188	1.40887	0.302234	0.519657
ZNF554	1.25337	0.210072	0.784387	0.432813	1.44091	0.30893	0.510139
ZNF45	1.2656	0.205655	0.75603	0.449631	1.42951	0.312626	0.504975
C14orf43	-0.0941374	0.925	1.64348	0.100284	1.09555	0.313324	0.504006
HOXD11	0.373199	0.709	1.50896	0.131309	1.33089	0.314123	0.5029
ZNF92	1.6779	0.093366	0.00125331	0.999	1.18734	0.314537	0.502329
ZFP30	1.34414	0.178902	0.621912	0.534	1.39021	0.319874	0.495022
HIF3A	0.969907	0.332093	1.05127	0.293136	1.42919	0.324118	0.489297
ZNF233	1.06385	0.287396	0.93967	0.347387	1.4167	0.329885	0.481638
PITX1	0.796069	0.425992	1.17638	0.239443	1.39473	0.334845	0.475156
ZNF653	0.937155	0.348679	1.04948	0.293959	1.40476	0.335978	0.47369
ZNF692	0.739529	0.459586	1.21782	0.223292	1.38405	0.336262	0.473322
VPS72	1.42763	0.153399	0.427521	0.669	1.31179	0.336266	0.473317
TAF4	0.693567	0.487954	1.25153	0.210742	1.37539	0.336741	0.472705
TOP2B	1.08063	0.27986	0.899818	0.368217	1.40039	0.337233	0.472069
ADNP	1.16791	0.242842	0.782205	0.434094	1.37894	0.342586	0.465231
SOX9	0.833711	0.404444	1.12007	0.262686	1.38153	0.34444	0.462887
ZNF669	0.794906	0.426668	1.1443	0.2525	1.37122	0.347775	0.458702
CIZ1	1.11812	0.263514	0.812209	0.416672	1.36495	0.352356	0.453018
ZNF703	0.903714	0.366147	1.03115	0.302473	1.36815	0.354452	0.450443
FOXC1	0.768717	0.442061	1.14427	0.25251	1.35269	0.356375	0.448093
ZNF580	0.801072	0.42309	1.11194	0.266163	1.3527	0.358533	0.445471
ZNF337	0.280622	0.779	1.45666	0.145212	1.22844	0.359643	0.444129
SMAD7	-0.0928786	0.926	1.53853	0.123919	1.02223	0.363181	0.439876
ZNF668	0.62648	0.531	1.236	0.21646	1.31697	0.363595	0.439382
ZNF75A	1.30674	0.191303	0.508647	0.611	1.28367	0.367788	0.434402
ZNF529	1.32571	0.184936	0.476104	0.634	1.27408	0.368567	0.433483
PATZ1	1.12423	0.260915	0.756152	0.449558	1.32963	0.368669	0.433364
NPAS4	-0.170013	0.865	1.49201	0.135696	0.934795	0.368841	0.433161
ZNF302	1.34454	0.178772	0.442676	0.658	1.26376	0.369388	0.432518
ZNF410	1.3887	0.164924	0.355787	0.722	1.23354	0.372467	0.428913
ZNF444	0.992971	0.320724	0.892922	0.371899	1.33353	0.372896	0.428412
ZNF572	1.16867	0.242536	0.684574	0.493613	1.31044	0.373835	0.42732
MIER2	0.905052	0.365438	0.974619	0.329749	1.32913	0.375497	0.425394
ZNF490	1.33418	0.182145	0.428895	0.668	1.24668	0.377967	0.422546
ZNF462	0.557772	0.577	1.23458	0.216988	1.26738	0.385351	0.414144
ONECUT1	0.912791	0.361352	0.93257	0.351042	1.30487	0.388763	0.410315
MIXL1	1.106	0.268726	0.713459	0.475562	1.28655	0.390713	0.408142
ZNF777	0.895088	0.37074	0.94167	0.346361	1.29878	0.391975	0.406742
ZNF793	0.467699	0.64	1.27245	0.203212	1.23047	0.395342	0.403027
MYNN	1.18647	0.235437	0.581357	0.561	1.25004	0.399456	0.398531
NKX6-2	0.865518	0.386755	0.950901	0.341655	1.2844	0.39957	0.398407
ZNF771	0.71648	0.473695	1.07889	0.280637	1.26952	0.401187	0.396653
GSC	0.830595	0.406203	0.966775	0.333657	1.27093	0.4064	0.391047
NFX1	1.01299	0.311065	0.771728	0.440276	1.26199	0.409234	0.388028
ZNF532	-0.565108	0.572	1.17133	0.241467	0.428662	0.411545	0.385583
KDM5C	1.12649	0.259957	0.620392	0.535	1.23523	0.413438	0.383589
ZNHIT2	0.873396	0.382447	0.90043	0.367892	1.25428	0.416629	0.380251
TAF9B	1.06829	0.285388	0.678316	0.497571	1.23504	0.419176	0.377604
ZNF622	0.474701	0.635	1.2118	0.22559	1.19253	0.421608	0.375092
MLX	1.21503	0.224355	-0.450985	0.652	0.540261	0.427463	0.369101
ZBTB49	0.579873	0.562	1.12535	0.260442	1.20577	0.427634	0.368928
ZNF28	0.915993	0.359671	0.826152	0.408718	1.23188	0.428854	0.367691
ZNF721	0.994428	0.320015	0.709621	0.477939	1.20494	0.440131	0.356418
LBX1	1.1166	0.264165	0.549008	0.583	1.17776	0.442119	0.354461
ZFPM1	0.836725	0.402747	0.869074	0.384807	1.20618	0.443933	0.352682
SARNP	1.22766	0.219573	0.361133	0.718	1.12345	0.448896	0.347854
ZNF354C	1.21113	0.225847	0.373199	0.709	1.12029	0.453443	0.343478
ZNF844	1.30199	0.19292	-0.209574	0.834	0.772454	0.454851	0.34213
NR1D1	-0.314686	0.753	1.24249	0.214056	0.656056	0.455379	0.341627
ZNF385B	0.85576	0.392131	0.821041	0.411623	1.18568	0.455791	0.341235
CNOT7	1.33943	0.18043	0.121872	0.903	1.0333	0.458553	0.338611
YBX2	1.17508	0.239961	0.412463	0.68	1.12257	0.458997	0.33819
TBX5	1.05466	0.291582	0.582842	0.56	1.15789	0.459201	0.337997
NR2F6	0.950431	0.341893	0.703533	0.481723	1.16953	0.461754	0.335589
TRIM27	1.01138	0.311833	0.611301	0.541	1.14741	0.468927	0.328895
ZNF501	1.19837	0.230772	0.334503	0.738	1.08391	0.471782	0.326259
HDX	1.02808	0.303911	0.579873	0.562	1.137	0.472645	0.325465
EMX2	0.976208	0.328962	0.640266	0.522	1.14302	0.474268	0.323976
ZNF131	1.27531	0.2022	0.184017	0.854	1.0319	0.475959	0.32243
NFRKB	0.40293	0.687	1.14492	0.252244	1.09449	0.477033	0.321451
ZNF417	0.847671	0.396621	0.767507	0.44278	1.1421	0.481092	0.317772
ZNF507	1.12074	0.262398	0.417928	0.676	1.088	0.484154	0.315017
ZNF675	1.33668	0.181328	0.0188008	0.985	0.958468	0.486272	0.313121
ZNF324	0.819895	0.412276	0.765684	0.443865	1.12117	0.493774	0.306471
ZC3H8	0.722144	0.470206	0.857004	0.391443	1.11663	0.495578	0.304888
ALX4	0.938769	0.34785	0.623433	0.533	1.10464	0.49785	0.302902
TFAP2D	0.993953	0.320246	0.554846	0.579	1.09517	0.497881	0.302874
BARHL1	0.909817	0.362919	0.655727	0.512	1.10701	0.498542	0.302299
GABPA	1.15792	0.246898	0.314686	0.753	1.04129	0.498709	0.302152
SPZ1	1.02026	0.307606	0.515792	0.606	1.08615	0.499542	0.301428
DBP	0.612813	0.54	0.940882	0.346766	1.09863	0.500958	0.300199
ZNF140	1.19865	0.230663	0.237847	0.812	1.01576	0.501033	0.300134
ZNF235	0.685235	0.493196	0.8731	0.382608	1.10191	0.503377	0.298107
ZSWIM1	1.19794	0.230941	-0.226259	0.821	0.687081	0.504879	0.296813
ZNF627	1.20223	0.229275	-0.217267	0.828	0.696473	0.505272	0.296474
BNC1	0.913545	0.360956	0.623433	0.533	1.08681	0.509492	0.292862
ZBTB11	0.925626	0.35464	0.603765	0.546	1.08144	0.511539	0.291121
ZMAT5	1.09411	0.273906	-0.371856	0.71	0.510712	0.512916	0.289954
TFDP1	0.67018	0.502743	0.856961	0.391466	1.07985	0.516723	0.286742
MYOD1	0.925732	0.354586	0.588793	0.556	1.07093	0.51728	0.286275
ZNF446	1.03721	0.299638	0.441294	0.659	1.04546	0.517786	0.28585
ZNF696	0.822419	0.410838	0.70186	0.482767	1.07783	0.519208	0.284659
ZNF232	1.14484	0.252276	0.266311	0.79	0.997833	0.520757	0.283365
TBX4	0.9129	0.361295	0.591777	0.554	1.06397	0.522141	0.282212
ZNF264	0.869978	0.384312	0.635657	0.525	1.06464	0.524719	0.280073
ONECUT2	1.17202	0.24119	0.189118	0.85	0.962469	0.529891	0.275814
POU6F2	0.762853	0.445551	0.738363	0.460294	1.06152	0.530006	0.275719
ST18	0.807952	0.419118	0.68656	0.49236	1.05678	0.532019	0.274073
ZFP42	0.353118	0.724	1.06484	0.286949	1.00265	0.534214	0.272285
ZNF488	1.08293	0.278839	0.322598	0.747	0.993859	0.535064	0.271594
ZNF273	1.11768	0.263706	-0.265012	0.791	0.602924	0.535532	0.271214
TCF15	0.76288	0.445535	0.724123	0.46899	1.05147	0.536097	0.270757
TCF12	0.939487	0.347481	0.521527	0.602	1.03309	0.53646	0.270463
SUPT4H1	1.09819	0.272121	0.291067	0.771	0.982354	0.537432	0.269676
ZNF341	1.09595	0.273101	0.293683	0.769	0.982619	0.537759	0.269413
HIF1A	0.61584	0.538	0.858715	0.390498	1.04267	0.537873	0.26932
IRX6	0.769729	0.441461	0.710229	0.477562	1.04649	0.539022	0.268394
SLC30A9	0.98412	0.325056	0.455152	0.649	1.01772	0.539235	0.268222
ASCL2	0.798842	0.424382	0.668209	0.504	1.03736	0.543769	0.264586
BARX1	0.828263	0.407522	0.632592	0.527	1.03298	0.545117	0.26351
DRAP1	0.875214	0.381457	0.573952	0.566	1.02472	0.546869	0.262117
ZNF41	0.911016	0.362287	0.530161	0.596	1.01907	0.546897	0.262095
ZNF304	0.855117	0.392487	0.596262	0.551	1.02628	0.547413	0.261685
ZIC2	0.82264	0.410713	0.631062	0.528	1.02792	0.548326	0.260961
TCFL5	1.13029	0.258354	-0.201893	0.84	0.656475	0.548572	0.260767
ALX3	0.733813	0.463063	0.724012	0.469058	1.03084	0.548856	0.260542
NKX2-3	0.885409	0.375936	0.554846	0.579	1.01841	0.549563	0.259982
VSX2	0.822609	0.41073	0.617356	0.537	1.01821	0.553958	0.256523
TBX6	0.823133	0.410432	0.612813	0.54	1.01537	0.555575	0.255257
ZNF680	1.16452	0.244212	0.113039	0.91	0.903373	0.556478	0.254552
ARX	0.749365	0.453637	0.679405	0.496881	1.01029	0.561224	0.250863
ISL1	0.670357	0.50263	0.755952	0.449678	1.00855	0.562144	0.250152
NEUROG2	0.845342	0.39792	0.565108	0.572	0.997339	0.564501	0.248335
TAF1B	0.83589	0.403217	0.575431	0.565	0.997954	0.564807	0.2481
VSX1	0.841867	0.399862	0.560703	0.575	0.991767	0.567909	0.245721
FOXK2	0.652622	0.514	0.759437	0.447591	0.998477	0.568116	0.245563
SP5	0.794081	0.427148	0.608283	0.543	0.991621	0.570871	0.243462
ZIC3	0.869779	0.384421	0.515792	0.606	0.979746	0.572356	0.242334
ZFP91	0.795061	0.426578	0.599259	0.549	0.985934	0.574147	0.240977
WT1	0.60076	0.548	0.793652	0.427398	0.985998	0.57418	0.240952
ZNF775	0.854314	0.392931	0.525839	0.599	0.975916	0.575849	0.239691
TFDP2	0.56217	0.574	0.820296	0.412048	0.977551	0.577509	0.238441
ISL2	0.761241	0.446513	0.628006	0.53	0.982346	0.577707	0.238293
MLL4	0.171285	0.864	1.0937	0.274088	0.894477	0.577937	0.238119
ZC3HC1	0.786363	0.431655	0.599259	0.549	0.979783	0.578177	0.237939
SOX3	0.757224	0.448916	0.631062	0.528	0.981666	0.578247	0.237886
CTBP2	0.53594	0.592	0.836504	0.402871	0.970465	0.580362	0.236301
TP73	0.694136	0.487597	0.691136	0.48948	0.979535	0.580605	0.236119
ZNF79	1.1621	0.245193	0.0275764	0.978	0.841231	0.582221	0.234912
FOXA2	0.763738	0.445023	0.611301	0.541	0.9723	0.583588	0.233894
OLIG3	0.859251	0.390202	0.487365	0.626	0.952201	0.588559	0.23021
MESP1	0.683654	0.494194	0.683472	0.494309	0.966704	0.588584	0.230191
ZNF431	1.01874	0.308327	0.26112	0.794	0.904998	0.589326	0.229644
POU4F1	0.705802	0.480311	0.657281	0.511	0.963845	0.590209	0.228994
ZNF589	0.620392	0.535	0.734744	0.462495	0.958226	0.593005	0.226942
CXXC1	0.623433	0.533	0.731441	0.46451	0.958041	0.593212	0.22679
RAX	0.795564	0.426285	0.549008	0.583	0.950756	0.594524	0.225831
CREB3L3	0.821749	0.41122	0.51436	0.607	0.944772	0.596033	0.224729
PITX2	0.534494	0.593	0.804177	0.421294	0.946583	0.596335	0.22451
SP6	0.867428	0.385708	0.456542	0.648	0.936188	0.596489	0.224398
FOXE1	0.717209	0.473245	0.628006	0.53	0.951211	0.597709	0.22351
HNF1A	0.75621	0.449523	0.584327	0.559	0.947903	0.59835	0.223045
SIM1	0.666643	0.505	0.67524	0.499523	0.948855	0.599696	0.222069
ZNF524	0.922291	0.356377	0.373199	0.709	0.91605	0.600262	0.221659
GATA4	0.390726	0.696	0.907871	0.363946	0.918247	0.601136	0.221028
USF2	0.914654	0.360373	0.381274	0.703	0.916359	0.601185	0.220992
PAX6	0.88932	0.373831	0.407011	0.684	0.916644	0.604412	0.218667
OLIG1	0.753082	0.4514	0.566579	0.571	0.933142	0.607198	0.21667
GLIS2	0.591777	0.554	0.72478	0.468587	0.930947	0.609696	0.214887
MAFA	0.831277	0.405817	0.467699	0.64	0.918515	0.609866	0.214766
ZNF334	0.624956	0.532	0.691554	0.489217	0.930913	0.610594	0.214247
MSRB2	0.682344	0.495022	-0.632592	0.527	0.0351796	0.611418	0.213662
POU2F3	0.824183	0.409836	0.470497	0.638	0.915477	0.612222	0.213091
CRX	0.85937	0.390136	0.422034	0.673	0.90609	0.613677	0.21206
PDX1	0.795567	0.426284	0.498687	0.618	0.915175	0.614855	0.211227
BARX2	0.614326	0.539	0.688818	0.490938	0.921462	0.616416	0.210126
IRX1	0.741723	0.458255	0.550466	0.582	0.913715	0.619185	0.20818
NKX2-1	0.805836	0.420337	0.474701	0.635	0.905477	0.619462	0.207985
NKX2-2	0.731748	0.464322	0.557772	0.577	0.911828	0.620781	0.207062
HNF1B	0.8703	0.384137	0.382622	0.702	0.885949	0.62308	0.205456
PITX3	0.690237	0.490045	0.596262	0.551	0.909692	0.62354	0.205136
GBX2	0.579873	0.562	0.704684	0.481007	0.908319	0.623947	0.204853
EMX1	0.646431	0.518	0.638728	0.523	0.908745	0.624715	0.204318
ZNF493	0.724744	0.468609	0.554846	0.579	0.904807	0.625251	0.203945
VAX1	0.547551	0.584	0.729515	0.465687	0.903022	0.626081	0.20337
DMRTC2	0.813114	0.416153	0.446827	0.655	0.890912	0.626886	0.202811
HOXD1	0.605269	0.545	0.668209	0.504	0.900485	0.629607	0.20093
PAX1	0.745822	0.455775	0.508647	0.611	0.887043	0.634489	0.197576
UTF1	0.729776	0.465527	0.517224	0.605	0.881762	0.638518	0.194827
TBR1	0.483135	0.629	0.757899	0.448511	0.877544	0.639113	0.194422
FOXD2	0.608283	0.543	0.640266	0.522	0.882857	0.640796	0.19328
GLI2	0.522963	0.601	0.710818	0.477197	0.872415	0.644999	0.190441
GATA5	0.691069	0.489522	0.543189	0.587	0.872752	0.645691	0.189976
NKX3-2	0.504372	0.614	0.717538	0.473042	0.864021	0.649538	0.187396
ZNF678	0.73548	0.462047	0.483135	0.629	0.861691	0.64976	0.187247
RFX4	0.870769	0.38388	0.308108	0.758	0.833592	0.650196	0.186955
DLX4	0.684481	0.493671	0.53594	0.592	0.862968	0.651764	0.185909
HOXC12	0.637192	0.524	0.585815	0.558	0.864796	0.651935	0.185796
CDKN2A	0.434397	0.664	0.770062	0.441263	0.851681	0.65268	0.1853
FOXA1	0.657281	0.511	0.56217	0.574	0.862283	0.653067	0.185042
MNX1	0.382622	0.702	0.809507	0.418224	0.842962	0.653409	0.184815
ZNF587	-0.25076	0.802	0.903193	0.366424	0.46134	0.65375	0.184588
ZBTB6	0.860813	0.389341	-0.312053	0.755	0.388032	0.653849	0.184522
TFCP2L1	0.582842	0.56	0.632592	0.527	0.859441	0.655277	0.183575
FOXA3	0.666643	0.505	0.544642	0.586	0.856508	0.656264	0.182921
TLX1	0.70276	0.482205	0.504372	0.614	0.853571	0.656439	0.182805
SOX1	0.646431	0.518	0.565108	0.572	0.856688	0.656709	0.182627
LHX8	0.721402	0.470662	0.477509	0.633	0.847758	0.658692	0.181318
ZNF711	0.362471	0.717	0.813667	0.415836	0.831655	0.658964	0.181138
LHX4	0.690884	0.489639	0.511501	0.609	0.850215	0.659007	0.18111
T	0.741135	0.458611	0.448212	0.654	0.840996	0.66111	0.179726
PHF20	0.897731	0.369329	0.233981	0.815	0.800241	0.662398	0.178881
ZNF133	-0.0463893	0.963	1.00934	0.312812	0.680909	0.66268	0.178696
ZNF828	0.982302	0.325951	0.0941374	0.925	0.761158	0.663	0.178487
MYF6	0.82256	0.410758	0.333178	0.739	0.81723	0.665446	0.176887
PRDM14	0.575431	0.565	0.61584	0.538	0.842356	0.665945	0.176561
MKX	0.547551	0.584	0.641805	0.521	0.841002	0.666295	0.176333
ZNF709	0.817538	0.413621	-0.337155	0.736	0.339682	0.666487	0.176208
ZBBX	0.721057	0.470874	0.457934	0.647	0.833672	0.666761	0.17603
ZNF471	-0.319958	0.749	0.824764	0.409506	0.356952	0.669207	0.174439
SOX8	0.709487	0.478022	0.463508	0.643	0.829433	0.669973	0.173942
PAX2	0.679546	0.496792	0.497268	0.619	0.832134	0.670145	0.173831
PAX7	0.543189	0.587	0.634124	0.526	0.832486	0.671614	0.17288
HLF	0.079041	0.937	0.974537	0.32979	0.744992	0.67191	0.172689
GRHL2	0.710135	0.47762	0.455152	0.649	0.823982	0.673038	0.17196
KLF1	0.678963	0.497161	0.490189	0.624	0.826716	0.673334	0.171769
CNOT8	0.938757	0.347855	-0.135774	0.892	0.567795	0.673403	0.171725
HNF4A	0.709959	0.47773	0.453762	0.65	0.822875	0.67368	0.171546
FOXN1	0.720504	0.471215	0.441294	0.659	0.821515	0.673688	0.171541
ZBTB47	0.0451346	0.964	0.989159	0.322586	0.731356	0.674204	0.171209
SIM2	0.685206	0.493214	0.48032	0.631	0.824151	0.674491	0.171024
GATA1	0.643345	0.52	0.521527	0.602	0.823689	0.676612	0.16966
PRDM13	0.632592	0.527	0.52872	0.597	0.821171	0.678442	0.168487
NKRF	0.113039	0.91	0.942312	0.346033	0.746246	0.678755	0.168287
FOXL1	0.669777	0.503	0.484544	0.628	0.816228	0.679902	0.167553
ZC3H10	0.905843	0.365019	0.166199	0.868	0.758049	0.680999	0.166854
DMRTA1	0.614326	0.539	0.541737	0.588	0.81746	0.681108	0.166784
FOXE3	0.591777	0.554	0.563639	0.573	0.817002	0.681694	0.16641
HOXA11	0.620392	0.535	0.533049	0.594	0.815605	0.682093	0.166156
DLX2	0.501527	0.616	0.647977	0.517	0.812822	0.682874	0.165659
NEUROD6	0.769475	0.441612	-0.354452	0.723	0.293465	0.683804	0.165069
GSC2	0.505796	0.613	0.641805	0.521	0.811476	0.683904	0.165005
MTA3	0.248174	0.804	0.84558	0.397787	0.773401	0.684415	0.164681
ZNF226	0.394787	0.693	0.736263	0.461571	0.799773	0.684469	0.164646
ZFYVE21	0.585815	0.558	-0.56217	0.574	0.0167192	0.684952	0.16434
OLIG2	0.621912	0.534	0.522963	0.601	0.809549	0.685682	0.163877
ZNF575	0.629533	0.529	0.51436	0.607	0.808855	0.685874	0.163756
ZBTB3	0.973889	0.330111	-0.031338	0.975	0.666485	0.686731	0.163213
MEF2B	0.507221	0.612	0.631062	0.528	0.804887	0.688177	0.1623
RFX6	0.909151	0.36327	0.138304	0.89	0.740663	0.688374	0.162176
HOXA10	0.617356	0.537	0.515792	0.606	0.801256	0.690751	0.160678
OVOL1	0.751691	0.452237	0.358459	0.72	0.784995	0.690963	0.160545
LMO4	0.953862	0.340153	0.0488987	0.961	0.709059	0.692393	0.159647
POU3F3	0.272809	0.785	0.812363	0.416583	0.767332	0.692539	0.159556
ZBTB32	0.560703	0.575	0.568051	0.57	0.79815	0.693356	0.159043
NKX2-5	0.422034	0.673	0.693362	0.488082	0.788705	0.694169	0.158535
ELF3	0.591777	0.554	0.534494	0.593	0.796394	0.694217	0.158505
FUBP3	-0.0966555	0.923	0.92146	0.35681	0.583225	0.695121	0.157939
FOXF2	0.494434	0.621	0.62648	0.531	0.792606	0.695583	0.157651
ZNF579	0.36381	0.716	0.737292	0.460945	0.778597	0.695899	0.157454
FOXH1	0.596262	0.551	0.517224	0.605	0.787354	0.699561	0.155174
FOXG1	0.628006	0.53	0.481727	0.63	0.7847	0.700159	0.154803
FOXF1	0.568051	0.57	0.538836	0.59	0.782688	0.702783	0.153178
ESRRB	0.765594	0.443918	0.306794	0.759	0.758293	0.703473	0.152752
NPAS1	0.647977	0.517	0.450985	0.652	0.777084	0.703637	0.152651
ZC3H15	0.816618	0.414147	0.235269	0.814	0.743796	0.703671	0.15263
FOXL2	0.566579	0.571	0.537387	0.591	0.780622	0.704047	0.152399
GCM2	0.618873	0.536	0.48032	0.631	0.777247	0.704866	0.151893
FOXQ1	0.424776	0.671	0.666643	0.505	0.77175	0.705558	0.151467
FOXI1	0.629533	0.529	0.464904	0.642	0.773884	0.706383	0.15096
BARHL2	0.553385	0.58	0.544642	0.586	0.776422	0.706666	0.150786
ZSCAN16	0.768	0.442487	-0.292375	0.77	0.336317	0.707566	0.150233
NR1I3	0.585815	0.558	0.507221	0.612	0.772893	0.708406	0.149718
DLX1	0.541737	0.588	0.551925	0.581	0.773335	0.708548	0.149631
ZDHHC24	0.254642	0.799	0.790367	0.429314	0.738932	0.710042	0.148716
ZBTB25	0.504372	0.614	0.584327	0.559	0.769827	0.71026	0.148582
DLX3	0.665079	0.506	0.413828	0.679	0.762902	0.710632	0.148355
MLXIPL	0.510073	0.61	0.57691	0.564	0.768614	0.71113	0.148051
EGR4	0.195502	0.845	0.824978	0.409384	0.721589	0.71314	0.146825
OTX1	0.563639	0.573	0.517224	0.605	0.764285	0.713921	0.14635
IRX4	0.56217	0.574	0.518657	0.604	0.76426	0.713953	0.14633
ZSCAN1	0.644888	0.519	0.423405	0.672	0.755397	0.716142	0.145001
ZNF2	0.252053	0.801	0.775999	0.437749	0.726943	0.718106	0.143811
KLF14	0.477509	0.633	0.591777	0.554	0.756099	0.718153	0.143783
CDX2	0.497268	0.619	0.569525	0.569	0.754337	0.719752	0.142817
ZFYVE28	0.130716	0.896	0.849758	0.39546	0.6933	0.721959	0.141488
AIRE	0.537387	0.591	0.522963	0.601	0.749781	0.722849	0.140952
DMRT1	0.53594	0.592	0.524401	0.6	0.749774	0.722858	0.140947
DMRT2	0.508647	0.611	0.544642	0.586	0.744787	0.725793	0.139187
FOXI2	0.549008	0.583	0.501527	0.616	0.742841	0.726903	0.138524
RBPJL	0.543189	0.587	0.507221	0.612	0.742751	0.727021	0.138453
SPDEF	0.494434	0.621	0.553385	0.58	0.740919	0.727978	0.137882
FOXR1	0.672917	0.501	0.359796	0.719	0.730238	0.728018	0.137858
SIX5	0.531604	0.595	0.51436	0.607	0.739609	0.728983	0.137283
ETV3L	0.568051	0.57	0.476104	0.634	0.73833	0.729202	0.137152
ZFX	0.807531	0.41936	0.173829	0.862	0.693926	0.729312	0.137086
ZFP1	0.792599	0.428011	-0.195502	0.845	0.422212	0.729496	0.136977
ZNF326	0.377234	0.706	0.651072	0.515	0.727122	0.731444	0.135819
ZNF223	0.569525	0.569	-0.466301	0.641	0.0729902	0.732595	0.135136
NKX2-8	0.481727	0.63	0.554846	0.579	0.732968	0.732636	0.135112
ZNF830	0.823122	0.410439	-0.134509	0.893	0.486923	0.734399	0.134068
KDM1A	0.732265	0.464007	-0.265012	0.791	0.330397	0.734908	0.133767
POU3F1	0.0765268	0.939	0.857338	0.391258	0.660342	0.735271	0.133553
FOXP3	0.76128	0.44649	0.221119	0.825	0.694661	0.736233	0.132985
GRHL3	0.522963	0.601	0.504372	0.614	0.726436	0.736892	0.132596
SOX21	0.444059	0.657	0.579873	0.562	0.724029	0.737111	0.132467
ZNF827	-0.449598	0.653	0.573952	0.566	0.0879315	0.737473	0.132254
PAX9	0.530161	0.596	0.493018	0.622	0.723497	0.738581	0.131602
ZNF250	0.819322	0.412603	-0.124398	0.901	0.491385	0.739614	0.130995
OVOL2	0.608283	0.543	0.40565	0.685	0.716958	0.739812	0.130879
GFI1B	0.473299	0.636	0.546096	0.585	0.720821	0.739916	0.130818
NEUROD2	0.547551	0.584	0.469097	0.639	0.718879	0.741017	0.130172
MEIS3	0.808091	0.419038	0.135774	0.892	0.667413	0.741614	0.129822
SOX30	0.849478	0.395615	0.068987	0.945	0.649453	0.741688	0.129779
SP8	0.593271	0.553	0.41656	0.677	0.714058	0.742203	0.129477
RAX2	0.637192	0.524	0.365149	0.715	0.708762	0.742477	0.129317
HOXA13	0.401571	0.688	0.603765	0.546	0.71088	0.743446	0.128751
HMG20B	0.481727	0.63	0.527279	0.598	0.713475	0.744514	0.128127
EN2	0.323918	0.746	0.665079	0.506	0.699327	0.745231	0.127709
FUBP1	0.448212	0.654	0.556308	0.578	0.710303	0.745753	0.127405
DMRTB1	0.500107	0.617	0.501527	0.616	0.708262	0.747752	0.126243
BATF2	0.508647	0.611	0.491603	0.623	0.707283	0.748313	0.125917
HIRA	0.570999	0.568	0.422034	0.673	0.702181	0.749866	0.125016
ZNF687	0.427521	0.669	0.563639	0.573	0.700856	0.750896	0.12442
HES7	0.543189	0.587	0.448212	0.654	0.701026	0.751434	0.124109
MSX1	0.388022	0.698	0.594766	0.552	0.694936	0.75277	0.123338
ZNF192	0.660396	0.509	0.297611	0.766	0.677413	0.757128	0.120831
ZNF841	0.420665	0.674	0.554846	0.579	0.68979	0.757459	0.120641
ZNF570	0.854678	0.392729	0.00751996	0.994	0.609666	0.757578	0.120572
RFXAP	0.596262	0.551	-0.370513	0.711	0.159629	0.758882	0.119826
GSX2	0.469097	0.639	0.504372	0.614	0.688347	0.759429	0.119513
ZNF296	0.632592	0.527	0.325239	0.745	0.677289	0.759681	0.119369
NHLH1	0.409735	0.682	0.557772	0.577	0.684131	0.76052	0.118889
ZNF862	0.430269	0.667	0.538836	0.59	0.685261	0.760535	0.118881
ZNF84	0.587303	0.557	0.374543	0.708	0.680128	0.761305	0.118441
ZSCAN10	0.508647	0.611	0.449598	0.653	0.677582	0.765583	0.116008
ZNF384	0.26112	0.794	0.669777	0.503	0.658244	0.76595	0.1158
FOSL1	0.594766	0.552	0.353118	0.724	0.670255	0.766194	0.115661
RELA	0.164929	0.869	0.730681	0.464974	0.633292	0.770218	0.113386
NKX3-1	0.504372	0.614	0.441294	0.659	0.668687	0.770728	0.113099
ZDHHC12	0.365149	0.715	0.569525	0.569	0.660914	0.772721	0.111977
ZNF513	0.609791	0.542	0.314686	0.753	0.653704	0.77388	0.111326
LHX3	0.413828	0.679	0.521527	0.602	0.661396	0.774446	0.111009
NR2E1	0.531604	0.595	0.40293	0.687	0.660815	0.774452	0.111005
GCM1	0.694001	0.487681	0.203173	0.839	0.634398	0.77481	0.110805
KLF17	0.484544	0.628	0.449598	0.653	0.660538	0.77563	0.110345
TBPL2	0.605269	0.545	0.314686	0.753	0.650507	0.775898	0.110195
ZNF23	0.491603	0.623	0.441294	0.659	0.659658	0.776051	0.110109
DUXA	0.679414	0.496875	0.217267	0.828	0.63405	0.776813	0.109684
LBX2	0.365149	0.715	0.554846	0.579	0.650535	0.779089	0.108413
ZNF197	0.484544	0.628	0.437154	0.662	0.651738	0.780629	0.107555
TFAP2E	0.400213	0.689	0.518657	0.604	0.649739	0.780998	0.10735
BACH1	0.623433	0.533	0.275412	0.783	0.635579	0.782033	0.106775
NR2E3	0.456542	0.648	0.457934	0.647	0.646632	0.783704	0.105848
NR1I2	0.448212	0.654	0.464904	0.642	0.645671	0.784236	0.105553
ELF5	0.739401	0.459664	-0.107995	0.914	0.446472	0.784465	0.105426
VENTX	0.417928	0.676	0.487365	0.626	0.640138	0.787093	0.103974
ZDHHC6	0.466301	0.641	-0.427521	0.669	0.0274218	0.791917	0.10132
ZNF673	0.323918	0.746	0.557772	0.577	0.623449	0.79328	0.100574
DMBX1	0.397498	0.691	0.487365	0.626	0.625693	0.795065	0.0995973
ZNF500	0.346456	0.729	0.533049	0.594	0.621904	0.79545	0.0993869
MYF5	0.587303	0.557	0.281926	0.778	0.614638	0.795718	0.0992408
ZNF383	0.736313	0.46154	-0.0752699	0.94	0.467428	0.796137	0.099012
ZFAND1	0.602262	0.547	0.259823	0.795	0.609586	0.796986	0.0985495
LMX1A	0.487365	0.626	0.381274	0.703	0.61422	0.801295	0.0962073
MYOG	0.409735	0.682	0.459326	0.646	0.614519	0.801701	0.0959878
SP1	0.634124	0.526	-0.203173	0.839	0.304728	0.802308	0.0956587
FOXP2	0.680597	0.496127	0.133245	0.894	0.575473	0.804121	0.0946785
SLC26A3	0.685989	0.49272	0.118085	0.906	0.568567	0.806443	0.0934264
PAX3	0.408373	0.683	0.448212	0.654	0.605697	0.806667	0.0933058
THOC1	0.428895	0.668	0.424776	0.671	0.603636	0.80791	0.092637
HOXA1	0.259823	0.795	0.573952	0.566	0.589569	0.809305	0.091888
SMAD5	0.588793	0.556	-0.236558	0.813	0.249068	0.810943	0.0910095
MAEL	0.427521	0.669	0.412463	0.68	0.593958	0.81323	0.0897864
GSX1	0.161119	0.872	0.638728	0.523	0.565577	0.814124	0.0893096
IRX2	0.24559	0.806	0.572475	0.567	0.578459	0.814865	0.0889141
LHX6	0.591777	0.554	0.218551	0.827	0.572988	0.815769	0.0884327
ZNF839	-0.240426	0.81	0.573952	0.566	0.235839	0.816005	0.0883073
ZNF611	0.515792	0.606	-0.305481	0.76	0.148712	0.817638	0.0874391
C2orf3	0.510073	0.61	0.310738	0.756	0.580401	0.818103	0.0871923
BUD31	0.343796	0.731	0.48032	0.631	0.582738	0.818181	0.0871508
TFDP3	0.466301	0.641	0.358459	0.72	0.583193	0.818381	0.0870444
HR	0.57691	0.564	0.226259	0.821	0.567926	0.819557	0.0864209
TBX10	0.565108	0.572	0.239136	0.811	0.568687	0.820209	0.0860754
NKX6-3	0.463508	0.643	0.353118	0.724	0.577442	0.821466	0.0854105
ZNF224	0.258527	0.796	0.546096	0.585	0.568955	0.821564	0.0853587
BNC2	-0.205732	0.837	0.585815	0.558	0.268759	0.822621	0.0848002
POU3F4	0.485954	0.627	0.321278	0.748	0.570799	0.824101	0.0840193
ZNF740	0.649524	0.516	0.110516	0.912	0.537429	0.825307	0.0833844
ZNF138	0.641805	0.521	-0.119348	0.905	0.369433	0.825995	0.0830228
HMGA2	0.511501	0.609	0.280622	0.779	0.560116	0.82817	0.0818803
CBFA2T3	0.438533	0.661	0.361133	0.718	0.565449	0.82831	0.0818072
ZNF282	0.172557	0.863	0.596262	0.551	0.543637	0.828991	0.0814503
HNF4G	0.550466	0.582	0.228831	0.819	0.551046	0.829841	0.0810053
ZDHHC19	0.16747	0.867	0.59776	0.55	0.5411	0.829983	0.0809309
PROP1	0.259823	0.795	0.524401	0.6	0.55453	0.830094	0.0808728
SIX6	0.366489	0.714	0.423405	0.672	0.558539	0.832164	0.0797909
TRIM29	-0.37858	0.705	0.407011	0.684	0.0201039	0.833929	0.0788707
CDX1	0.223688	0.823	0.544642	0.586	0.543291	0.833972	0.0788486
ZNF512	0.338482	0.735	0.438533	0.661	0.549433	0.836553	0.0775068
NR5A1	0.330529	0.741	0.445443	0.656	0.548695	0.836741	0.077409
ELF2	0.584327	0.559	-0.163658	0.87	0.297458	0.83691	0.0773214
SP3	0.483135	0.629	-0.287147	0.774	0.138585	0.837281	0.0771286
RFX2	0.175101	0.861	0.573952	0.566	0.529661	0.837627	0.0769495
ZDHHC4	0.339809	0.734	0.419296	0.675	0.536768	0.843399	0.0739669
PFDN1	0.608283	0.543	-0.105474	0.916	0.35554	0.844756	0.0732686
ZNF615	0.566579	0.571	-0.15858	0.874	0.288499	0.845917	0.0726723
SALL1	0.235269	0.814	0.501527	0.616	0.520994	0.847559	0.0718303
ZNF354B	0.407011	0.684	0.338482	0.735	0.527143	0.848465	0.0713659
ZNF804B	0.540286	0.589	0.181468	0.856	0.510357	0.849456	0.070859
ZNF541	0.111777	0.911	0.582842	0.56	0.49117	0.853513	0.0687896
ZNF148	0.584327	0.559	0.104213	0.917	0.486872	0.855152	0.0679568
ZC3H11A	-0.0238152	0.981	0.634124	0.526	0.431553	0.857415	0.0668091
ZNF683	0.40565	0.685	0.309423	0.757	0.505633	0.859088	0.0659622
ZFYVE20	0.133245	0.894	0.551925	0.581	0.484488	0.859658	0.0656742
ZNF517	0.159849	0.873	0.531604	0.595	0.488931	0.859672	0.0656672
PTF1A	0.267609	0.789	0.439913	0.66	0.500294	0.860525	0.0652364
LYL1	0.253347	0.8	0.444059	0.657	0.493141	0.863674	0.0636503
PHF21A	0.0175473	0.986	0.611301	0.541	0.444663	0.86865	0.0611554
JUND	0.566579	0.571	0.079041	0.937	0.456523	0.869653	0.0606539
ZNF761	0.140835	0.888	0.520091	0.603	0.467346	0.869926	0.0605175
ZSWIM2	0.469097	0.639	0.201893	0.84	0.474462	0.870734	0.0601143
GTF2H3	0.420665	0.674	0.246881	0.805	0.472026	0.874318	0.0583306
ZCRB1	0.500107	0.617	-0.148434	0.882	0.24867	0.875309	0.0578388
IRF6	0.459326	0.646	0.195502	0.845	0.463033	0.876326	0.0573344
ZDHHC15	0.0162938	0.987	0.587303	0.557	0.426808	0.878666	0.0561761
ZBTB44	0.343796	0.731	-0.313369	0.754	0.0215146	0.879511	0.0557587
FOXC2	0.353118	0.724	0.302855	0.762	0.463843	0.879817	0.0556077
ZNF479	0.573952	0.566	0.0225616	0.982	0.421799	0.882254	0.0544062
ZCCHC8	0.424776	0.671	-0.212137	0.832	0.150358	0.883694	0.0536982
ZBED2	0.305481	0.76	0.338482	0.735	0.45535	0.883885	0.0536043
ZBTB7B	0.0941374	0.925	0.517224	0.605	0.432298	0.884481	0.0533116
RFX7	0.493018	0.622	-0.124398	0.901	0.260653	0.884943	0.0530848
ZNF506	0.215984	0.829	0.412463	0.68	0.444379	0.886843	0.0521533
ZNF514	0.079041	0.937	0.515792	0.606	0.42061	0.889179	0.0510106
GLI1	0.305481	0.76	0.310738	0.756	0.435732	0.892953	0.0491715
ZFR	0.484544	0.628	-0.0966555	0.923	0.274278	0.895748	0.0478143
HOXA3	-0.0300841	0.976	0.530161	0.596	0.353608	0.896863	0.0472738
SMAD6	0.0953964	0.924	0.478914	0.632	0.406099	0.89809	0.0466803
POU1F1	0.488776	0.625	0.0815557	0.935	0.403286	0.898308	0.0465745
ZNF142	-0.278016	0.781	0.312053	0.755	0.024068	0.901121	0.0452168
STRN3	0.504372	0.614	-0.0401168	0.968	0.328278	0.903584	0.0440317
ESRRG	-0.105474	0.916	0.455152	0.649	0.24726	0.903652	0.0439987
ZUFSP	0.350451	0.726	-0.219835	0.826	0.09236	0.90633	0.0427138
MLL	0.00877331	0.993	0.517224	0.605	0.371936	0.906886	0.0424475
NR1D2	0.470497	0.638	0.0677307	0.946	0.380584	0.908297	0.041772
GPBP1	0.379926	0.704	-0.173829	0.862	0.145733	0.909955	0.0409803
ATOH8	0.124398	0.901	0.420665	0.674	0.385418	0.910167	0.0408788
PRDM16	0.25076	0.802	0.291067	0.771	0.383129	0.915587	0.0383002
HIC1	0.185292	0.853	0.349119	0.727	0.377886	0.916445	0.0378937
MXD4	0.323918	0.746	0.204452	0.838	0.373614	0.918822	0.0367687
ZNF280A	0.397498	0.691	0.119348	0.905	0.365465	0.918919	0.0367228
RORC	0.235269	0.814	0.281926	0.778	0.365712	0.922595	0.034989
PHOX2B	-0.121872	0.903	0.382622	0.702	0.184378	0.922875	0.0348571
ZNF160	-0.0100267	0.992	0.460719	0.645	0.318688	0.925552	0.033599
ZNF720	0.26112	0.794	-0.230118	0.818	0.0219216	0.92979	0.0316152
ZNF654	0.272809	0.785	-0.208293	0.835	0.0456196	0.932344	0.0304236
USF1	0.198058	0.843	0.281926	0.778	0.3394	0.932504	0.0303491
ZNF3	0.262417	0.793	-0.213419	0.831	0.0346466	0.933817	0.0297383
ZDHHC3	0.244298	0.807	0.217267	0.828	0.326376	0.937595	0.0279847
ZNF193	0.407011	0.684	0.0238152	0.981	0.30464	0.938721	0.0274633
ZNF782	0.313369	0.754	-0.130716	0.896	0.129156	0.940533	0.0266259
RCHY1	0.302855	0.762	-0.137039	0.891	0.11725	0.941842	0.0260221
MAFF	-0.148434	0.882	0.285841	0.775	0.0971611	0.94361	0.0252073
ZNF585A	0.195502	0.845	0.239136	0.811	0.307336	0.944272	0.0249029
SIN3A	0.278016	0.781	-0.152237	0.879	0.0889392	0.944726	0.0246942
MORC1	0.335829	0.737	-0.0828133	0.934	0.178909	0.945423	0.024374
BCLAF1	0.322598	0.747	0.0966555	0.923	0.296457	0.945841	0.0241818
ZFPL1	0.105474	0.916	0.312053	0.755	0.295236	0.946618	0.0238251
TCF21	-0.182743	0.855	0.240426	0.81	0.0407884	0.946975	0.0236613
BAZ1B	0.142101	0.887	0.266311	0.79	0.288791	0.949932	0.0223073
SALL2	-0.0100267	0.992	0.375888	0.707	0.258703	0.950151	0.0222076
ERF	0.184017	0.854	0.210856	0.833	0.279217	0.95364	0.0206155
TBL1XR1	0.323918	0.746	-0.0501536	0.96	0.193581	0.955251	0.0198824
FOXJ1	0.227545	0.82	0.15858	0.874	0.273031	0.955425	0.0198036
NPAT	0.333178	0.739	0.0376083	0.97	0.262185	0.955475	0.0197809
ZMYND15	0.13198	0.895	0.252053	0.801	0.271553	0.955496	0.019771
ZNF770	0.338482	0.735	-0.0300841	0.976	0.21807	0.955651	0.0197008
ZNF585B	0.237847	0.812	0.135774	0.892	0.26419	0.957924	0.018669
HOXB9	-0.00250663	0.998	0.347787	0.728	0.24415	0.958643	0.0183431
SNAPC2	0.126925	0.899	0.236558	0.813	0.257021	0.960017	0.0177209
ZSCAN30	-0.176374	0.86	0.189118	0.85	0.00901155	0.960053	0.0177048
ZGPAT	-0.0275764	0.978	0.318639	0.75	0.205813	0.960832	0.0173526
ZNF248	0.298921	0.765	0.047644	0.962	0.245059	0.961581	0.0170141
PREB	0.1459	0.884	0.208293	0.835	0.250453	0.962255	0.0167097
ZSCAN21	0.236558	0.813	0.115562	0.908	0.248986	0.962275	0.0167009
E2F6	0.279319	0.78	-0.061451	0.951	0.154056	0.963352	0.0162152
SOX7	0.194225	0.846	0.154773	0.877	0.246779	0.9634	0.0161934
AR	-0.121872	0.903	0.222403	0.824	0.071086	0.964033	0.0159082
ARNT2	0.194225	0.846	0.147167	0.883	0.241401	0.964898	0.0155187
ZNF75D	-0.0175473	0.986	0.308108	0.758	0.205458	0.965006	0.0154702
HIC2	-0.115562	0.908	0.218551	0.827	0.0728243	0.966025	0.0150119
GZF1	-0.105474	0.916	0.226259	0.821	0.0854081	0.966345	0.014868
MORC4	0.294992	0.768	-0.0250689	0.98	0.190864	0.966516	0.0147908
GFI1	0.157311	0.875	0.175101	0.861	0.235051	0.966725	0.0146971
ZNF175	0.182743	0.855	0.143367	0.886	0.230595	0.96789	0.0141739
BTAF1	0.266311	0.79	0.0338459	0.973	0.212243	0.970902	0.0128246
ZDHHC5	-0.134509	0.893	0.175101	0.861	0.028703	0.970955	0.0128007
ZDHHC16	0.168741	0.866	-0.13957	0.889	0.0206276	0.971218	0.0126833
SOX17	-0.0463893	0.963	0.239136	0.811	0.136293	0.974046	0.0114206
PURB	-0.137039	0.891	0.138304	0.89	0.000894665	0.97692	0.0101411
ZSWIM3	0.157311	0.875	-0.110516	0.912	0.0330887	0.978066	0.00963181
ZDHHC13	0.25076	0.802	0.00375995	0.997	0.179972	0.978424	0.00947284
HSF2	0.175101	0.861	0.0878448	0.93	0.185931	0.978677	0.00936044
PHTF2	0.0991741	0.921	0.135774	0.892	0.166133	0.983032	0.00743218
TSHZ3	0.130716	0.896	-0.0853288	0.932	0.0320936	0.985583	0.00630673
ARID3A	0.0463893	0.963	0.163658	0.87	0.148526	0.986072	0.00609131
TEF	0.159849	0.873	0.0388625	0.969	0.14051	0.987471	0.00547563
ZFAT	0.149702	0.881	0.0463893	0.963	0.138657	0.98788	0.00529579
HOXA9	-0.047644	0.962	0.144634	0.885	0.0685822	0.988363	0.00508368
ZNHIT3	0.00375995	0.997	0.184017	0.854	0.132778	0.988374	0.00507887
TGIF1	0.0112801	0.991	0.175101	0.861	0.131792	0.988663	0.00495162
NR1H4	0.13198	0.895	-0.0514085	0.959	0.0569727	0.98945	0.00460599
ZC3HAV1L	-0.00626661	0.995	0.1459	0.884	0.098736	0.99244	0.00329593
ZNF347	0.13198	0.895	-0.0162938	0.987	0.0818026	0.992917	0.00308701
IFT57	0.104213	0.917	0.021308	0.983	0.088757	0.994972	0.00218913
TBX21	0.0263226	0.979	0.0238152	0.981	0.0354528	0.999205	0.000345262
BPTF	0.0150403	0.988	0.00125331	0.999	0.0115214	0.999915	3.67913e-05
ATF6	0	1	-0.00626661	0.995	-0.00443116	0.999987	-5.43779e-06
FOXD3	-0.0891031	0.929	0.0376083	0.97	-0.0364123	0.994943	-0.00220188
ZNF467	-0.0828133	0.934	-0.0501536	0.96	-0.0940218	0.994464	-0.00241086
TEAD1	-0.100434	0.92	0.0413712	0.967	-0.0417635	0.993673	-0.00275648
HINFP	-0.0878448	0.93	0.0627068	0.95	-0.0177753	0.992934	-0.00307969
MBD1	0.0376083	0.97	-0.154773	0.877	-0.0828482	0.988253	-0.00513188
KDM5A	0.0652185	0.948	-0.140835	0.888	-0.0534692	0.986773	-0.00578279
ZNF236	0.0865867	0.931	-0.123135	0.902	-0.0258437	0.986415	-0.00594019
RFX5	0.0991741	0.921	-0.119348	0.905	-0.0142648	0.985299	-0.00643185
MEIS2	0.0752699	0.94	-0.163658	0.87	-0.0625002	0.98229	-0.00776018
BATF	0.0225616	0.982	-0.236558	0.813	-0.151318	0.978149	-0.00959518
EWSR1	-0.214702	0.83	0.0501536	0.96	-0.116353	0.977794	-0.00975247
ZNF707	-0.124398	0.901	-0.153505	0.878	-0.196507	0.976474	-0.0103393
FBXW7	-0.266311	0.79	0	1	-0.18831	0.976221	-0.010452
ZMAT1	-0.227545	0.82	-0.0514085	0.959	-0.19725	0.975359	-0.0108355
BCL3	-0.138304	0.89	-0.149702	0.881	-0.203651	0.974805	-0.0110821
CEBPA	0.0162938	0.987	-0.284536	0.776	-0.189676	0.970172	-0.0131515
ZMAT2	-0.243007	0.808	0.0828133	0.934	-0.113274	0.967091	-0.0145326
ETV7	-0.0652185	0.948	-0.266311	0.79	-0.234427	0.96545	-0.0152702
TAF9	-0.0125335	0.99	-0.312053	0.755	-0.229518	0.965024	-0.0154621
NFIC	-0.329206	0.742	-0.0100267	0.992	-0.239874	0.961622	-0.0169955
MTF2	0.0288302	0.977	-0.314686	0.753	-0.202131	0.961505	-0.0170486
ZNF81	0.0627068	0.95	-0.288453	0.773	-0.159627	0.961095	-0.0172337
SMAD4	0.15858	0.874	-0.212137	0.832	-0.0378708	0.958842	-0.0182529
SMAD9	-0.268909	0.788	-0.102953	0.918	-0.262946	0.957627	-0.0188038
ZNF843	0.182743	0.855	-0.195502	0.845	-0.00902224	0.957332	-0.0189375
FOXO4	-0.258527	0.796	-0.13198	0.895	-0.27613	0.953993	-0.0204549
IRF7	-0.0162938	0.987	-0.357123	0.721	-0.264045	0.953723	-0.0205775
ZNF746	-0.0627068	0.95	-0.329206	0.742	-0.277124	0.951403	-0.0216355
ZNF461	-0.0112801	0.991	-0.370513	0.711	-0.269969	0.951298	-0.0216832
ZNF451	-0.0526635	0.958	-0.359796	0.719	-0.291653	0.945588	-0.0242979
HOXA5	-0.407011	0.684	-0.0125335	0.99	-0.296663	0.941149	-0.0263415
HES4	-0.219835	0.826	-0.232693	0.816	-0.319985	0.939916	-0.0269108
SNAPC5	-0.109255	0.913	-0.335829	0.737	-0.314722	0.939468	-0.0271182
ZNF638	-0.232693	0.816	-0.228831	0.819	-0.326347	0.937639	-0.0279645
SLC2A4RG	-0.330529	0.741	-0.125661	0.9	-0.322576	0.937071	-0.0282274
ZSCAN18	-0.341138	0.733	-0.116823	0.907	-0.323827	0.93623	-0.0286175
NR2C1	0.0714998	0.943	-0.381274	0.703	-0.219043	0.935451	-0.0289791
FOXN2	-0.205732	0.837	-0.266311	0.79	-0.333785	0.93475	-0.0293045
TCEAL1	-0.00877331	0.993	-0.434397	0.664	-0.313369	0.933971	-0.0296668
ZHX1	0.207013	0.836	-0.270208	0.787	-0.0446861	0.933378	-0.0299426
KDM5B	-0.293683	0.769	-0.187843	0.851	-0.34049	0.931898	-0.0306318
TBP	-0.259823	0.795	-0.232693	0.816	-0.348262	0.929456	-0.0317711
HELZ	-0.190395	0.849	-0.301544	0.763	-0.347853	0.929052	-0.0319601
FOXS1	-0.434397	0.664	-0.0325919	0.974	-0.330211	0.928595	-0.0321738
ZBTB7A	-0.370513	0.711	0.124398	0.901	-0.17403	0.925896	-0.0334377
HOXB4	-0.394787	0.693	-0.101693	0.919	-0.351065	0.924218	-0.0342256
ZFY	-0.466301	0.641	0.0112801	0.991	-0.321748	0.923478	-0.0345736
CREB3L1	-0.272809	0.785	0.244298	0.807	-0.0201603	0.922687	-0.0349454
ZNF189	-0.0539186	0.957	-0.439913	0.66	-0.349192	0.921829	-0.0353497
SP2	-0.0752699	0.94	-0.426148	0.67	-0.354556	0.92099	-0.0357451
ZNF70	0.233981	0.815	-0.300232	0.764	-0.046847	0.917648	-0.0373238
AEBP2	0.1143	0.909	-0.413828	0.679	-0.211798	0.915043	-0.0385587
POU2F1	-0.456542	0.648	-0.079041	0.937	-0.378715	0.910118	-0.0409021
CITED2	-0.450985	0.652	-0.09162	0.927	-0.38368	0.908729	-0.0415656
TFCP2	-0.287147	0.774	-0.301544	0.763	-0.416267	0.9016	-0.0449863
NR1H2	0.181468	0.856	-0.40293	0.687	-0.156597	0.900283	-0.045621
HLX	-0.314686	0.753	0.283231	0.777	-0.0222423	0.898687	-0.0463914
ZNF397	0.240426	0.81	-0.357123	0.721	-0.082517	0.898112	-0.0466694
ZSCAN20	-0.347787	0.728	-0.258527	0.796	-0.428729	0.895663	-0.0478555
GON4L	-0.483135	0.629	-0.101693	0.919	-0.413536	0.894877	-0.0482367
HOPX	-0.369171	0.712	0.239136	0.811	-0.0919488	0.894537	-0.0484016
ZRSR2	-0.427521	0.669	0.176374	0.86	-0.177588	0.893385	-0.0489616
ZNF774	-0.0589399	0.953	-0.521527	0.602	-0.410452	0.892479	-0.049402
SNAI1	-0.350451	0.726	0.271508	0.786	-0.0558211	0.890765	-0.0502369
ZFP41	-0.415194	0.678	0.203173	0.839	-0.149922	0.889756	-0.0507292
SATB1	-0.142101	0.887	-0.470497	0.638	-0.433172	0.888092	-0.0515422
PBX4	-0.135774	0.892	-0.477509	0.633	-0.433656	0.887367	-0.0518966
SREBF2	-0.345126	0.73	-0.294992	0.768	-0.452631	0.885069	-0.0530228
ZNF407	-0.446827	0.655	-0.184017	0.854	-0.446074	0.884333	-0.0533843
MLLT10	0.0488987	0.961	-0.559237	0.576	-0.360864	0.880913	-0.055067
ZNF652	-0.150969	0.88	-0.488776	0.625	-0.452368	0.87881	-0.0561048
PCGF2	-0.453762	0.65	-0.194225	0.846	-0.458196	0.878751	-0.0561344
THRB	-0.236558	0.813	-0.423405	0.672	-0.466664	0.876608	-0.0571947
ZNF213	-0.521527	0.602	0.119348	0.905	-0.284384	0.875683	-0.0576531
SOX18	-0.361133	0.718	0.323918	0.746	-0.0263149	0.870029	-0.0604664
ZC3H7A	-0.424776	0.671	-0.262417	0.793	-0.485919	0.867816	-0.0615721
TEAD3	-0.572475	0.567	0.0777838	0.938	-0.3498	0.867654	-0.0616533
MECP2	-0.498687	0.618	-0.180194	0.857	-0.480042	0.866248	-0.0623578
ZNHIT6	-0.365149	0.715	0.341138	0.733	-0.0169788	0.862704	-0.0641384
ZNF91	0.0941374	0.925	-0.575431	0.565	-0.340326	0.861752	-0.0646178
ZNF454	0.210856	0.833	-0.488776	0.625	-0.19652	0.86045	-0.0652743
ZNF789	-0.502949	0.615	0.195502	0.845	-0.217398	0.859829	-0.0655878
ZDHHC20	0.178921	0.858	-0.521527	0.602	-0.242259	0.857752	-0.0666384
TAL1	-0.582842	0.56	-0.135774	0.892	-0.508138	0.846241	-0.0725061
HOXA7	0.36381	0.716	-0.398855	0.69	-0.0247807	0.842407	-0.0744782
HMG20A	-0.343796	0.731	-0.419296	0.675	-0.539587	0.841973	-0.074702
GATA3	-0.223688	0.823	-0.525839	0.599	-0.529996	0.841656	-0.0748653
RBAK	-0.214702	0.83	-0.534494	0.593	-0.529761	0.841099	-0.075153
TFIP11	0.275412	0.783	-0.485954	0.627	-0.148876	0.840212	-0.0756112
PGR	-0.599259	0.549	0.134509	0.893	-0.328628	0.839725	-0.0758631
PRDM10	-0.319958	0.749	-0.449598	0.653	-0.544159	0.838896	-0.0762916
VEZF1	0.0664746	0.947	-0.654174	0.513	-0.415566	0.836535	-0.0775157
ERV3	-0.222403	0.824	-0.540286	0.589	-0.539303	0.836192	-0.0776939
RC3H2	0.170013	0.865	-0.587303	0.557	-0.295069	0.833627	-0.0790284
ZNF267	0.0865867	0.931	-0.651072	0.515	-0.399151	0.831912	-0.0799225
ZBTB34	0.288453	0.773	-0.498687	0.618	-0.148658	0.830622	-0.0805966
ZBTB10	0.390726	0.696	-0.407011	0.684	-0.0115154	0.8294	-0.0812359
ZDHHC8	-0.585815	0.558	-0.185292	0.853	-0.545255	0.829333	-0.0812709
ZNF568	0.361133	0.718	-0.450985	0.652	-0.0635353	0.82345	-0.084363
GRLF1	-0.560703	0.575	-0.237847	0.812	-0.56466	0.82251	-0.0848589
TRAFD1	-0.390726	0.696	-0.441294	0.659	-0.588327	0.816164	-0.0882226
ETV3	-0.551925	0.581	-0.275412	0.783	-0.585015	0.813233	-0.0897852
ZNF597	-0.168741	0.866	-0.637192	0.524	-0.569881	0.812334	-0.0902653
PHF2	0.396142	0.692	-0.459326	0.646	-0.0446776	0.806949	-0.0931541
CLOCK	-0.308108	0.758	-0.543189	0.587	-0.601958	0.805264	-0.0940615
CIR1	-0.213419	0.831	-0.621912	0.534	-0.590668	0.804297	-0.0945833
ZBTB1	0.187843	0.851	-0.644888	0.519	-0.32318	0.802598	-0.0955017
ESR1	-0.570999	0.568	-0.296301	0.767	-0.613274	0.797644	-0.0981911
ZNF212	-0.502949	0.615	-0.374543	0.708	-0.620481	0.797447	-0.0982979
HOXB3	-0.770535	0.440983	0.0288302	0.977	-0.524464	0.793615	-0.10039
ZNF346	0.0828133	0.934	-0.740793	0.458819	-0.465262	0.79167	-0.101456
NR2C2	-0.505796	0.613	-0.411099	0.681	-0.648342	0.782133	-0.106719
KLF8	-0.412463	0.68	-0.505796	0.613	-0.649307	0.781597	-0.107017
ZNF277	-0.0125335	0.99	-0.820713	0.41181	-0.589194	0.773491	-0.111545
ZNF207	-0.407011	0.684	-0.530161	0.596	-0.662681	0.773466	-0.111559
MIER3	0.36381	0.716	-0.57691	0.564	-0.150685	0.770002	-0.113508
ZNF571	-0.0275764	0.978	-0.83106	0.40594	-0.607148	0.763764	-0.117041
ZBTB2	0.147167	0.883	-0.758232	0.448312	-0.432088	0.762701	-0.117646
RB1	0.0300841	0.976	-0.83641	0.402924	-0.570158	0.760278	-0.119028
ZFP161	0.13957	0.889	-0.769004	0.441891	-0.445077	0.759892	-0.119248
ZNF623	-0.740324	0.459103	-0.185292	0.853	-0.65451	0.758745	-0.119904
ZNF710	-0.439913	0.66	-0.550466	0.582	-0.700304	0.751646	-0.123987
ZRANB1	-0.255936	0.798	-0.712023	0.47645	-0.684451	0.747882	-0.126167
RELB	-0.398855	0.69	-0.603765	0.546	-0.708959	0.744514	-0.128127
FOSL2	-0.882917	0.377281	0.00375995	0.997	-0.621658	0.743937	-0.128464
ZNF33A	-0.0576844	0.954	-0.852203	0.394101	-0.643388	0.743764	-0.128565
PRDM4	-0.581357	0.561	-0.428895	0.668	-0.714356	0.742564	-0.129266
ZMYM2	0.142101	0.887	-0.809871	0.418014	-0.472185	0.738646	-0.131563
BCL6B	-0.693538	0.487972	-0.316003	0.752	-0.713854	0.734833	-0.133811
ZDHHC1	-0.721225	0.470771	-0.283231	0.777	-0.710257	0.733663	-0.134504
BBX	-0.382622	0.702	-0.641805	0.521	-0.724379	0.733615	-0.134532
SCAND3	-0.119348	0.905	-0.838685	0.401646	-0.677431	0.731343	-0.135879
HOXA4	-0.594766	0.552	-0.442676	0.658	-0.733582	0.731066	-0.136044
ZNF510	0.471897	0.637	-0.570999	0.568	-0.0700757	0.729645	-0.136888
ZNF468	0.390726	0.696	-0.644888	0.519	-0.17972	0.729043	-0.137247
ZNF335	-0.808322	0.418905	-0.178921	0.858	-0.698086	0.727202	-0.138345
BLZF1	-0.215984	0.829	-0.793517	0.427476	-0.713825	0.722007	-0.141459
ZNF382	-0.635657	0.525	-0.423405	0.672	-0.74887	0.720366	-0.142447
LASS6	-0.638728	0.523	-0.422034	0.673	-0.750072	0.71951	-0.142963
ZNF672	-0.0300841	0.976	-0.914877	0.360256	-0.668189	0.719124	-0.143196
RXRA	-0.791832	0.428458	-0.227545	0.82	-0.720809	0.718838	-0.143369
ZNF101	-0.396142	0.692	-0.663516	0.507	-0.749292	0.718323	-0.14368
ZCCHC9	-0.00751996	0.994	-0.930572	0.352075	-0.663331	0.717398	-0.14424
CREB3	0.0175473	0.986	-0.925921	0.354487	-0.642317	0.716938	-0.144518
MORC3	0.0100267	0.992	-0.935417	0.349574	-0.65435	0.714039	-0.146278
ZKSCAN4	-0.221119	0.825	-0.808877	0.418586	-0.728317	0.712507	-0.147211
BRD8	-0.932701	0.350974	0.0263226	0.979	-0.640907	0.710664	-0.148336
ZNF449	-0.551925	0.581	-0.543189	0.587	-0.774362	0.707923	-0.150014
ZNF821	0.209574	0.834	-0.827626	0.407882	-0.437029	0.706983	-0.150591
TAF2	0.0878448	0.93	-0.907838	0.363964	-0.579823	0.705159	-0.151713
LASS3	-0.456542	0.648	-0.646431	0.518	-0.77992	0.70209	-0.153607
ZCCHC10	0.268909	0.788	-0.800067	0.423672	-0.375586	0.700108	-0.154835
HOXB6	-0.931905	0.351385	-0.0627068	0.95	-0.703297	0.700068	-0.15486
RFX1	-0.895023	0.370775	0.125661	0.9	-0.544021	0.699937	-0.154941
PAX5	-0.276714	0.782	-0.794847	0.426703	-0.757708	0.69992	-0.154952
ZNF280B	-0.390726	0.696	-0.711393	0.47684	-0.779316	0.697939	-0.156183
ZNF415	0.0275764	0.978	-0.959689	0.337212	-0.659103	0.695629	-0.157622
ZFP28	-0.280622	0.779	-0.802089	0.422501	-0.765593	0.694891	-0.158083
CUX1	-0.940592	0.346914	-0.0941374	0.925	-0.731664	0.685638	-0.163905
ZNF644	-0.213419	0.831	-0.873363	0.382465	-0.768471	0.682137	-0.166128
RFX3	0.0325919	0.974	-0.983296	0.325462	-0.672249	0.681186	-0.166734
TSC22D4	-0.794156	0.427104	-0.361133	0.718	-0.816913	0.669138	-0.174484
IRF3	-0.643345	0.52	-0.544642	0.586	-0.840034	0.666838	-0.17598
PKNOX2	-0.700505	0.483612	0.487365	0.626	-0.150713	0.664479	-0.177518
ZFAND5	-0.524401	0.6	-0.679648	0.496727	-0.851391	0.658821	-0.181232
ZNF701	0.104213	0.917	-0.994455	0.320001	-0.629496	0.653223	-0.184938
ZNF445	-0.799911	0.423763	-0.404289	0.686	-0.851498	0.649851	-0.187186
BACH2	-1.04908	0.294144	-0.0576844	0.954	-0.782597	0.63721	-0.195717
CARHSP1	-0.812697	0.416392	-0.428895	0.668	-0.877938	0.634069	-0.197863
DZIP3	-0.476104	0.634	-0.776105	0.437687	-0.885446	0.633229	-0.198439
EOMES	-0.408373	0.683	-0.83455	0.403971	-0.878879	0.631197	-0.199835
ZNF24	-0.222403	0.824	-0.974085	0.330014	-0.846045	0.626043	-0.203396
TCF20	-0.800553	0.42339	-0.464904	0.642	-0.894814	0.625892	-0.2035
ZFAND6	-0.644888	0.519	-0.638728	0.523	-0.907653	0.625398	-0.203844
ZFC3H1	-0.501527	0.616	-0.775934	0.437788	-0.903301	0.623097	-0.205444
ZMYND17	-0.866474	0.38623	-0.393433	0.694	-0.890889	0.620951	-0.206942
ZNF10	-0.330529	0.741	-0.915604	0.359875	-0.88115	0.619135	-0.208214
VDR	-0.819763	0.412351	-0.48032	0.631	-0.919297	0.6105	-0.214314
CREB1	-0.437154	0.662	-0.862213	0.38857	-0.918791	0.606498	-0.217171
ZNF329	0.634124	0.526	-0.698431	0.484908	-0.0454718	0.60354	-0.219294
ZBTB43	-0.374543	0.708	-0.91539	0.359987	-0.91212	0.603279	-0.219482
PHOX2A	-0.557772	0.577	-0.769439	0.441633	-0.93848	0.603212	-0.21953
TSHZ1	-1.06917	0.284992	-0.135774	0.892	-0.852025	0.602379	-0.22013
PPARA	-0.979595	0.327286	-0.285841	0.775	-0.894798	0.601603	-0.22069
ARID4A	-0.439913	0.66	-0.877613	0.380154	-0.931631	0.597822	-0.223428
RARG	-0.808584	0.418754	-0.527279	0.598	-0.944598	0.597149	-0.223918
NOTCH4	-1.07797	0.281048	-0.152237	0.879	-0.869886	0.592454	-0.227345
ZNF398	-0.652622	0.514	-0.721037	0.470887	-0.971324	0.585405	-0.232544
ZRANB2	-0.417928	0.676	-0.919924	0.357613	-0.946004	0.584993	-0.232849
XBP1	-0.563639	0.573	-0.823722	0.410098	-0.981012	0.575299	-0.240106
GATA6	-0.888585	0.374226	-0.505796	0.613	-0.985976	0.567144	-0.246307
MXD1	-0.982611	0.325799	-0.383971	0.701	-0.966319	0.565647	-0.247455
TRIM16	-0.0865867	0.931	-1.16634	0.243477	-0.885953	0.563118	-0.249401
PML	-0.979033	0.327564	-0.400213	0.689	-0.975274	0.561653	-0.250532
TFAP2C	-0.910765	0.362419	-0.494434	0.621	-0.993625	0.560716	-0.251257
IRF5	-0.726338	0.467632	-0.704602	0.481058	-1.01183	0.56056	-0.251378
ZNF512B	-0.955711	0.339218	-0.437154	0.662	-0.984904	0.55997	-0.251836
ASH2L	-0.717784	0.472891	-0.715913	0.474045	-1.01378	0.559385	-0.252289
EHF	-0.0740131	0.941	-1.18441	0.23625	-0.88984	0.556596	-0.25446
HOXB7	-1.03319	0.301514	-0.346456	0.729	-0.975559	0.552811	-0.257424
MEF2A	-0.474701	0.635	-0.948421	0.342915	-1.0063	0.549692	-0.259881
LASS2	-0.490189	0.624	-0.948341	0.342956	-1.01719	0.543948	-0.264443
ZDHHC7	-0.621912	0.534	-0.840917	0.400394	-1.03438	0.543648	-0.264682
ZC3H7B	-0.827177	0.408136	-0.640266	0.522	-1.03764	0.54247	-0.265625
NPAS2	-1.06432	0.287186	-0.331853	0.74	-0.987241	0.54165	-0.266282
ZC3H3	-1.24815	0.211976	-0.0150403	0.988	-0.89321	0.53685	-0.270147
MYST2	-0.618873	0.536	-0.867001	0.385942	-1.05067	0.532819	-0.27342
RUNX1	-0.992018	0.321189	-0.462113	0.644	-1.02823	0.532789	-0.273445
GTF2I	-0.847632	0.396643	-0.644888	0.519	-1.05537	0.53123	-0.274717
BCL11B	-0.125661	0.9	-1.2069	0.227472	-0.94226	0.529437	-0.276186
ZNF385A	-0.641805	0.521	-0.854613	0.392766	-1.05813	0.529287	-0.276308
ZNF12	-0.373199	0.709	-1.07383	0.282899	-1.0232	0.522812	-0.281654
CEBPB	-0.982231	0.325986	-0.515792	0.606	-1.05926	0.517925	-0.285733
KLF3	-0.86304	0.388115	-0.663516	0.507	-1.07944	0.51667	-0.286787
KCNH8	-0.214702	0.83	-1.18507	0.235989	-0.98979	0.515199	-0.288025
IFI16	-0.370513	0.711	-1.0977	0.272336	-1.03818	0.511534	-0.291125
REST	-0.525839	0.599	-0.988485	0.322915	-1.07079	0.511198	-0.291411
RARB	-1.15086	0.24979	0.287147	0.774	-0.610738	0.511052	-0.291535
NOTCH3	-1.07777	0.281135	-0.412463	0.68	-1.05376	0.507481	-0.29458
ASH1L	-1.25204	0.210555	-0.118085	0.906	-0.968825	0.506805	-0.295159
CREBBP	-0.871215	0.383637	-0.679196	0.497014	-1.09631	0.506655	-0.295288
PAX4	0.031338	0.975	-1.29962	0.19373	-0.896814	0.503686	-0.29784
ZFHX3	-0.800382	0.42349	-0.771722	0.440279	-1.11165	0.499616	-0.301364
EBF4	-1.29347	0.195848	-0.0627068	0.95	-0.958963	0.498947	-0.301946
AEBP1	-1.20117	0.229683	-0.243007	0.808	-1.02119	0.498154	-0.302637
ZC3H12A	-0.773518	0.439216	-0.808656	0.418713	-1.11877	0.495319	-0.305115
ZFP90	0.498687	0.618	-1.04641	0.29537	-0.387302	0.492999	-0.307154
HOXA2	-0.603765	0.546	-0.966045	0.334022	-1.11002	0.492722	-0.307398
PBX2	-0.608283	0.543	-0.965114	0.334488	-1.11256	0.491446	-0.308524
ZFP3	-0.125661	0.9	-1.27715	0.201549	-0.991939	0.491048	-0.308876
THAP1	0.547551	0.584	-1.01996	0.307749	-0.334041	0.488193	-0.311409
NFKB1	-0.658838	0.51	-0.941213	0.346596	-1.13141	0.483085	-0.315976
ZNF655	-0.596262	0.551	-0.996161	0.319172	-1.12601	0.481523	-0.317383
ZFP2	-0.185292	0.853	-1.26951	0.204258	-1.0287	0.478679	-0.319955
MEOX2	-0.806487	0.419962	-0.821131	0.411572	-1.1509	0.47625	-0.322165
TEAD2	-0.960822	0.336641	-0.655727	0.512	-1.14307	0.475399	-0.322942
LASS4	-0.585815	0.558	-1.01776	0.308791	-1.1339	0.475302	-0.32303
TCF7L1	-0.993069	0.320676	-0.617356	0.537	-1.13874	0.475122	-0.323195
ZKSCAN5	-1.03591	0.300244	-0.573952	0.566	-1.13834	0.471123	-0.326865
HEY2	-0.876842	0.380572	-0.785257	0.432303	-1.17528	0.461438	-0.335887
TCF4	-0.265012	0.791	-1.26194	0.206971	-1.07972	0.459977	-0.337264
CSRNP1	-1.07492	0.28241	-0.570999	0.568	-1.16384	0.453962	-0.34298
SNAI2	-0.978063	0.328043	-0.692565	0.488583	-1.18131	0.453719	-0.343213
EBF2	-1.00953	0.312722	-0.657281	0.511	-1.17861	0.452849	-0.344047
GLIS3	-0.996974	0.318777	-0.674568	0.49995	-1.18196	0.452063	-0.344801
ZBTB41	-0.339809	0.734	-1.23538	0.21669	-1.11382	0.451471	-0.345371
HAND2	-1.13495	0.256397	-0.497268	0.619	-1.15415	0.450843	-0.345975
ZNF343	-0.618873	0.536	-1.05345	0.292134	-1.18251	0.446916	-0.349774
ZXDC	-1.09704	0.272623	0.569525	0.569	-0.373011	0.4442	-0.352422
SMAD1	-1.09081	0.275357	-0.591777	0.554	-1.18977	0.439379	-0.35716
MAX	-0.687135	0.491998	-1.02529	0.305226	-1.21087	0.434891	-0.361619
MORC2	-1.10114	0.270836	-0.606775	0.544	-1.20768	0.429488	-0.367049
SCYL1	-0.759992	0.447259	-0.984084	0.325074	-1.23325	0.425756	-0.37084
KLF2	-0.926236	0.354323	-0.824567	0.409617	-1.23801	0.425262	-0.371343
NFATC1	-0.955859	0.339143	-0.798175	0.424769	-1.24029	0.423175	-0.37348
PPARG	-0.858569	0.390578	-0.900934	0.367623	-1.24416	0.42226	-0.37442
MMP14	-1.02634	0.30473	-0.722532	0.469968	-1.23664	0.421537	-0.375164
NFIL3	-0.707081	0.479516	-1.05047	0.293501	-1.24278	0.416706	-0.38017
ZNF280D	-0.459326	0.646	-1.25515	0.209425	-1.21232	0.405912	-0.391568
JUNB	-1.05923	0.289494	-0.749859	0.45334	-1.27922	0.397751	-0.400389
ZCCHC2	-1.27415	0.202611	-0.473299	0.636	-1.23563	0.392899	-0.40572
ZFHX2	-1.37437	0.169327	-0.306794	0.759	-1.18876	0.392199	-0.406494
ZNF238	-0.882347	0.377589	-0.9536	0.340286	-1.29821	0.392136	-0.406564
EP300	-1.0922	0.274745	-0.740689	0.458882	-1.29605	0.387162	-0.412107
GABPB2	-0.518657	0.604	-1.26181	0.207018	-1.25898	0.385012	-0.414526
KLF4	-1.16042	0.245879	-0.683697	0.494166	-1.30399	0.377614	-0.422952
TFE3	-1.29415	0.195615	-0.49585	0.62	-1.26572	0.377141	-0.423496
NFIX	-1.18296	0.236824	-0.655727	0.512	-1.30015	0.377083	-0.423563
SREBF1	-1.24486	0.213182	-0.581357	0.561	-1.29133	0.373573	-0.427625
CREM	-0.992377	0.321014	-0.894383	0.371117	-1.33414	0.372591	-0.428767
DBX2	0.375888	0.707	-1.38438	0.166243	-0.71311	0.369177	-0.432766
MECOM	-1.07587	0.281986	-0.818283	0.413195	-1.33937	0.366992	-0.435343
SMAD2	-0.631062	0.528	-1.22674	0.219921	-1.31366	0.366138	-0.436356
ZFYVE19	-0.767422	0.442831	-1.12189	0.261909	-1.33595	0.365843	-0.436705
RBCK1	-1.42217	0.154978	-0.325239	0.745	-1.2356	0.364716	-0.438045
ATF3	-1.05066	0.293414	-0.855315	0.392377	-1.34773	0.364004	-0.438894
CIC	-1.49928	0.1338	-0.192948	0.847	-1.19659	0.360098	-0.443579
ZNF366	-1.04455	0.296231	-0.874812	0.381676	-1.35719	0.359521	-0.444275
SOX13	-1.22266	0.22146	-0.660396	0.509	-1.33152	0.358777	-0.445175
NOTCH1	-1.17388	0.240441	-0.72543	0.468188	-1.34302	0.358447	-0.445575
MNT	-1.31061	0.189989	-0.549008	0.583	-1.31495	0.354483	-0.450405
ZNF214	-0.204452	0.838	-1.51118	0.130744	-1.21313	0.351835	-0.453661
RBL2	-0.80983	0.418038	-1.12787	0.259377	-1.37016	0.349322	-0.456774
ZCCHC16	-1.03967	0.298492	-0.912678	0.361412	-1.38052	0.348097	-0.4583
LZTS1	-1.59332	0.111088	0.0463893	0.963	-1.09385	0.346087	-0.460815
TAF13	-0.806207	0.420124	-1.14214	0.253396	-1.37769	0.344924	-0.462276
ZFP37	0.445443	0.656	-1.40006	0.161496	-0.675014	0.343767	-0.463736
TADA2A	-0.73172	0.46434	-1.21356	0.224917	-1.37552	0.34038	-0.468036
EGR2	-1.16106	0.245617	-0.822732	0.41066	-1.40275	0.332247	-0.478539
MSL3	-0.657281	0.511	-1.29907	0.19392	-1.38335	0.328166	-0.483906
RXRB	-0.949907	0.342159	-1.06256	0.287982	-1.42303	0.326876	-0.485617
ZNF786	-1.08778	0.27669	-0.925978	0.354457	-1.42395	0.325807	-0.48704
SPIB	-1.00812	0.313398	-1.02203	0.306768	-1.43553	0.321296	-0.493094
ZFYVE16	-0.901537	0.367303	-1.13125	0.25795	-1.4374	0.31802	-0.497546
HOXC10	-0.669777	0.503	-1.3266	0.18464	-1.41165	0.31359	-0.503637
PLAG1	-0.00626661	0.995	-1.67922	0.0931092	-1.19182	0.313042	-0.504397
ZNF691	-0.383971	0.701	-1.51503	0.129765	-1.3428	0.309035	-0.509993
RNF6	-0.696695	0.485994	-1.3477	0.177755	-1.44561	0.297944	-0.525866
ZNF593	0.803888	0.421461	-1.268	0.204797	-0.328178	0.297763	-0.526129
ZNF394	-0.758212	0.448324	-1.30775	0.190958	-1.46086	0.296038	-0.528653
GATAD2B	-0.971566	0.331267	-1.14177	0.253549	-1.49436	0.292043	-0.534552
IRF4	-0.960472	0.336818	-1.15912	0.246407	-1.49878	0.289566	-0.538253
ZFYVE9	-1.02955	0.303219	-1.10455	0.269353	-1.50904	0.286266	-0.54323
KLF10	-0.890154	0.373383	-1.2336	0.21735	-1.50172	0.284967	-0.545205
ZFYVE26	-0.87664	0.380682	-1.24727	0.212298	-1.50183	0.284121	-0.546497
ZCCHC11	-0.550466	0.582	-1.48264	0.13817	-1.43762	0.283105	-0.548053
ZBTB22	-0.163658	0.87	-1.69543	0.089993	-1.31458	0.277731	-0.556376
DENND4A	-0.75466	0.450453	-1.36681	0.171685	-1.50011	0.275285	-0.560217
ZNHIT1	-0.170013	0.865	-1.70028	0.0890787	-1.3225	0.27456	-0.561362
PRRX1	-1.17931	0.238275	-0.993856	0.320293	-1.53666	0.272672	-0.56436
ZNF642	-0.477509	0.633	-1.55717	0.119429	-1.43874	0.270818	-0.567322
ZNF498	-1.0287	0.303619	-1.15694	0.247298	-1.54548	0.269489	-0.569459
ZNF688	1.01914	0.308135	-1.16735	0.243071	-0.104794	0.269007	-0.570236
HHEX	-0.957613	0.338258	-1.23111	0.21828	-1.54766	0.266243	-0.574721
NR2F2	-1.23123	0.218235	-0.966979	0.333554	-1.55437	0.263521	-0.579184
TRIM25	-1.18923	0.23435	-1.02355	0.306049	-1.56467	0.260708	-0.583846
NRK	-1.35645	0.174956	-0.840637	0.400551	-1.55358	0.256357	-0.591154
TAF6	-1.41824	0.15612	-0.772182	0.440007	-1.54886	0.252663	-0.597458
ETV5	-1.53303	0.125268	-0.603765	0.546	-1.51094	0.251865	-0.598832
BHLHE40	-1.23547	0.216656	-1.00914	0.312906	-1.58718	0.250244	-0.601637
IKZF5	-0.935805	0.349374	-1.30437	0.192108	-1.58404	0.248422	-0.604809
FOXP4	-1.21516	0.224304	-1.04857	0.294374	-1.6007	0.245474	-0.609994
NR5A2	-1.24681	0.212467	-1.02655	0.304632	-1.60751	0.241915	-0.616337
CBL	-0.980845	0.326669	-1.2899	0.197086	-1.60566	0.240976	-0.618025
MEOX1	-1.15622	0.247592	-1.13069	0.258187	-1.61708	0.239722	-0.620292
TCF25	-1.15532	0.24796	-1.15474	0.248195	-1.63346	0.233124	-0.632413
ZCCHC24	-1.33984	0.180298	-0.955844	0.339151	-1.62329	0.232024	-0.634467
CREB3L2	-1.39047	0.164386	-0.89835	0.368999	-1.61844	0.230653	-0.637041
MAF	-1.36187	0.173239	-0.952054	0.34107	-1.63619	0.226227	-0.645455
ZFHX4	-0.624956	0.532	-1.59803	0.110037	-1.57189	0.224678	-0.64844
TBX3	-1.78186	0.0747714	-0.281926	0.778	-1.45932	0.223634	-0.650462
CEBPD	-1.27657	0.201754	-1.06644	0.286227	-1.65675	0.222425	-0.652817
CSDA	-1.25991	0.2077	-1.08778	0.276694	-1.66007	0.221631	-0.65437
ERG	-1.35548	0.175264	-0.990262	0.322046	-1.65869	0.218691	-0.66017
ZFP36	-1.3924	0.163802	-0.945954	0.344172	-1.65346	0.218497	-0.660554
ELF4	-1.14212	0.253402	-1.23006	0.218674	-1.67739	0.215718	-0.666114
DDIT3	-0.53594	0.592	-1.69439	0.0901904	-1.57708	0.209838	-0.678116
ZDHHC2	-1.21904	0.222831	-1.17774	0.238902	-1.69477	0.209374	-0.679077
ETV6	-1.16318	0.244756	-1.2445	0.213316	-1.70249	0.20636	-0.685373
ALS2CR8	-0.934266	0.350167	-1.45274	0.146296	-1.68787	0.20345	-0.691542
ZNF217	-1.35616	0.175047	-1.08423	0.278262	-1.72562	0.195902	-0.707961
HES1	-1.426	0.153868	-1.02116	0.30718	-1.7304	0.191517	-0.717792
FOXO1	-1.06471	0.287009	-1.39327	0.163537	-1.73805	0.190514	-0.720074
RXRG	-1.29811	0.194248	-1.17591	0.239629	-1.7494	0.189322	-0.7228
SP4	-0.551925	0.581	-1.7505	0.0800314	-1.62806	0.189171	-0.723146
PGBD1	-1.154	0.248501	-1.32932	0.183744	-1.75597	0.186593	-0.729105
KLF9	-1.27038	0.203948	-1.22546	0.220402	-1.76483	0.184396	-0.73425
AFF1	-1.62675	0.103789	-0.788734	0.430268	-1.70801	0.183485	-0.7364
ZNF323	1.12126	0.262176	-1.37977	0.167659	-0.182789	0.1813	-0.741603
ELK3	-1.36372	0.172657	-1.14463	0.252361	-1.77367	0.180098	-0.744492
ZNF778	-0.830947	0.406004	-1.61243	0.106869	-1.72773	0.179525	-0.745876
SOX10	-1.54208	0.123055	-0.935398	0.349583	-1.75184	0.178358	-0.748706
RUNX3	-1.18589	0.235664	-1.33545	0.181728	-1.78286	0.177756	-0.750175
HEYL	-1.57102	0.116178	-0.906609	0.364614	-1.75195	0.176284	-0.753787
RUNX2	-1.34729	0.177887	-1.1921	0.233222	-1.79562	0.173514	-0.760664
ZC3H6	-1.19647	0.231513	-1.35804	0.174451	-1.80631	0.170001	-0.769549
MITF	-1.36114	0.17347	-1.19513	0.232035	-1.80756	0.169562	-0.770671
ZKSCAN1	-1.46131	0.143931	-1.1216	0.262034	-1.82639	0.161332	-0.792279
RREB1	-1.39894	0.161832	-1.19619	0.231622	-1.83503	0.160575	-0.794322
LZTR1	-1.57771	0.114633	-0.981226	0.326481	-1.80944	0.160384	-0.79484
ZNF521	-0.565108	0.572	-1.8432	0.0653	-1.70293	0.160141	-0.795499
MAFK	-1.87491	0.0608045	-0.507221	0.612	-1.68442	0.159683	-0.796743
ZMYM5	-0.774028	0.438914	-1.73199	0.0832756	-1.77202	0.157499	-0.802721
STAT5B	-1.84237	0.0654206	-0.634124	0.526	-1.75115	0.150355	-0.822881
CREB5	-1.56147	0.118412	-1.07185	0.283789	-1.86204	0.147626	-0.830837
ZNF706	-1.25386	0.209892	-1.41438	0.15725	-1.88673	0.14559	-0.836869
REL	-1.22869	0.219188	-1.44397	0.148747	-1.88986	0.144216	-0.840985
AFF4	-1.16211	0.245191	-1.50383	0.132624	-1.88511	0.143924	-0.841866
ZNF425	-1.20762	0.227194	-1.46647	0.142521	-1.89086	0.14345	-0.843299
LMO1	-1.30452	0.192057	-1.38077	0.167348	-1.89879	0.142628	-0.845796
AKNA	-1.34924	0.17726	-1.33725	0.181142	-1.89963	0.14252	-0.846123
CC2D1A	-1.82415	0.0681301	-0.720456	0.471244	-1.79931	0.142509	-0.846158
ZNF83	-1.49558	0.134763	-1.23831	0.215601	-1.93315	0.131868	-0.87986
ZMIZ1	-1.61288	0.10677	-1.09824	0.272101	-1.91705	0.131858	-0.879894
PROX1	-1.41465	0.157171	-1.32869	0.18395	-1.93983	0.13136	-0.881535
ZCCHC14	-1.31409	0.188814	-1.44663	0.148001	-1.95213	0.127917	-0.89307
ZDHHC17	-0.887367	0.374882	-1.79558	0.0725618	-1.89713	0.125251	-0.902219
NOTCH2	-1.47494	0.140229	-1.3163	0.188074	-1.9737	0.122252	-0.912745
STAT6	-1.43989	0.149899	-1.36184	0.173247	-1.98112	0.12078	-0.918005
ZNFX1	-1.36759	0.171442	-1.43568	0.151095	-1.98221	0.12054	-0.918868
ZMIZ2	-1.72025	0.0853864	-1.03343	0.301403	-1.94715	0.119925	-0.92109
ZMYM1	-0.540286	0.589	-2.02042	0.0433403	-1.81069	0.119162	-0.923862
DMTF1	-1.42878	0.153068	-1.39863	0.161923	-1.99928	0.116429	-0.933938
SOX15	-0.885504	0.375885	-1.84184	0.0654983	-1.92852	0.115817	-0.936229
SHOX2	-1.60712	0.108027	-1.22272	0.221434	-2.001	0.113218	-0.946085
CBFA2T2	-1.39429	0.163229	-1.46104	0.144005	-2.01902	0.111665	-0.952084
ZZZ3	-0.945773	0.344264	-1.84004	0.0657619	-1.96987	0.108399	-0.964974
MYT1	-1.25089	0.210974	-1.61583	0.106131	-2.02708	0.107456	-0.968768
ZFP36L1	-1.48883	0.136532	-1.41074	0.15832	-2.05031	0.104498	-0.980893
KLF6	-1.32286	0.185882	-1.59303	0.111154	-2.06184	0.100817	-0.996465
RNF141	-0.847061	0.396961	-1.94338	0.0519706	-1.97314	0.100696	-0.996986
SCAND2	-1.85291	0.0638952	-0.991059	0.321657	-2.01099	0.100394	-0.998294
SPI1	-1.53664	0.124382	-1.4027	0.160705	-2.07843	0.0981967	-1.0079
LCOR	-0.681742	0.495402	-2.05781	0.0396083	-1.93716	0.0967583	-1.01431
MEF2C	-1.55218	0.120619	-1.39722	0.162348	-2.08554	0.0966023	-1.01501
MYT1L	-1.66591	0.0957319	-1.28036	0.200419	-2.08333	0.0950411	-1.02209
ZHX3	-1.86092	0.0627548	-1.03733	0.299581	-2.04938	0.0935099	-1.02914
ZNF185	-2.13231	0.0329811	-0.596262	0.551	-1.92939	0.0910054	-1.04093
NR1H3	-1.34529	0.178531	-1.65422	0.0980824	-2.12098	0.0883406	-1.05384
ZC3H13	-1.59426	0.110877	-1.41757	0.156316	-2.12969	0.0876161	-1.05742
KLF13	-1.22281	0.221403	-1.76403	0.0777264	-2.11201	0.0871169	-1.0599
NFIA	-1.74021	0.0818227	-1.25567	0.209235	-2.11841	0.0867565	-1.0617
NR3C2	-1.66427	0.096058	-1.34936	0.177223	-2.13096	0.0863637	-1.06367
GATAD1	-1.44975	0.147128	-1.57377	0.11554	-2.13795	0.0862639	-1.06417
EPAS1	-1.53564	0.124628	-1.49333	0.135352	-2.1418	0.0857312	-1.06686
ATF2	-1.01662	0.309333	-1.93704	0.0527402	-2.08856	0.0834592	-1.07853
ZMYM4	-0.504372	0.614	-2.21888	0.0264952	-1.92563	0.0832688	-1.07952
IKZF3	-1.5528	0.12047	-1.49519	0.134865	-2.15526	0.0831829	-1.07997
GLI3	-1.78344	0.074514	-1.24115	0.21455	-2.13871	0.0821089	-1.08561
ZFP106	-1.55468	0.120023	-1.51169	0.130614	-2.16824	0.0808225	-1.09247
ZNF318	-1.08299	0.278811	-1.91406	0.0556123	-2.11924	0.0801094	-1.09632
GATA2	-1.16443	0.244252	-1.86053	0.0628105	-2.13897	0.0794262	-1.10004
TCF7	-1.48158	0.138453	-1.59683	0.110304	-2.17676	0.0791351	-1.10163
ZCCHC6	-1.38576	0.16582	-1.68619	0.0917589	-2.1722	0.078899	-1.10293
PRDM1	-1.67565	0.0938059	-1.40702	0.159421	-2.17978	0.0778051	-1.10899
IKZF4	-2.05216	0.0401544	-0.906867	0.364477	-2.09235	0.0764598	-1.11657
ZNF18	-1.47274	0.14082	-1.63261	0.102552	-2.19581	0.0756388	-1.12126
ZNF187	-0.916317	0.359501	-2.05256	0.0401149	-2.09932	0.075554	-1.12174
ZNF596	-1.16046	0.245863	-1.90028	0.0573969	-2.16426	0.0742384	-1.12937
HMBOX1	-2.18764	0.0286957	-0.69472	0.487231	-2.03814	0.0736825	-1.13264
ETS2	-1.71443	0.086449	-1.4211	0.155287	-2.21716	0.0712927	-1.14695
MEIS1	-1.25314	0.210154	-1.85992	0.0628971	-2.20127	0.0704019	-1.15242
HBP1	-0.657281	0.511	-2.22882	0.0258262	-2.04078	0.0703112	-1.15298
ZNF592	-1.9884	0.0467671	-1.08182	0.279334	-2.17097	0.0697326	-1.15656
ZBTB17	-1.25217	0.210508	-1.86656	0.0619635	-2.20527	0.0696468	-1.1571
ZNF713	-1.35684	0.174833	-1.80472	0.0711186	-2.23556	0.0669854	-1.17402
ZMYND11	-1.23368	0.217323	-1.91515	0.0554732	-2.22656	0.0653199	-1.18495
SP140	-1.84214	0.0654541	-1.33816	0.180844	-2.24882	0.0643521	-1.19144
ZNF643	-0.988915	0.322705	-2.09121	0.0365088	-2.17798	0.0641062	-1.1931
MEF2D	-1.9703	0.0488037	-1.17291	0.240833	-2.22259	0.0639815	-1.19395
MAFG	-2.0482	0.04054	-1.09001	0.275709	-2.21905	0.0614063	-1.21179
MSC	-1.80552	0.0709926	-1.44644	0.148055	-2.29948	0.0583911	-1.23365
ZFAND2A	-1.54758	0.121723	-1.73382	0.0829498	-2.3203	0.0564974	-1.24797
ZEB1	-1.07175	0.283833	-2.12115	0.0339095	-2.25772	0.0543159	-1.26507
TAF12	-0.85131	0.394597	-2.25457	0.0241605	-2.19619	0.053893	-1.26847
JUN	-1.19015	0.233988	-2.05294	0.0400788	-2.29321	0.0531673	-1.27436
INSM2	-0.82573	0.408958	-2.30876	0.0209566	-2.21642	0.0493606	-1.30662
JDP2	-1.92122	0.0547042	-1.421	0.155316	-2.36331	0.0490084	-1.30973
LITAF	-1.81445	0.0696084	-1.54638	0.122013	-2.37647	0.0489926	-1.30987
IKZF1	-1.74139	0.0816153	-1.64698	0.0995628	-2.39594	0.0472332	-1.32575
HEY1	-2.33415	0.0195877	-0.823033	0.410489	-2.23247	0.0468222	-1.32955
CSRNP3	-1.43879	0.150209	-1.93278	0.0532634	-2.38406	0.0466296	-1.33134
RCAN1	-1.61473	0.10637	-1.78889	0.073633	-2.40672	0.0458152	-1.33899
ZKSCAN3	-1.73332	0.0830396	-1.69396	0.0902726	-2.42345	0.0441778	-1.3548
NFKB2	-1.86083	0.0627687	-1.57383	0.115527	-2.42867	0.0429762	-1.36677
CBFB	-0.80594	0.420278	-2.38224	0.0172078	-2.25438	0.0428805	-1.36774
FLYWCH1	-2.28334	0.0224106	-0.989703	0.322319	-2.31439	0.0428376	-1.36817
KLF5	-1.0382	0.299179	-2.27233	0.0230664	-2.3409	0.0412409	-1.38467
TFAP2A	-2.09045	0.036577	-1.34999	0.177019	-2.43276	0.0391069	-1.40775
TP63	-1.82166	0.0685062	-1.69876	0.0893639	-2.48932	0.0373188	-1.42807
SP100	-1.82172	0.0684979	-1.73039	0.0835609	-2.51172	0.0352762	-1.45252
STAT1	-1.91861	0.0550333	-1.62996	0.103109	-2.50922	0.0350214	-1.45567
SOX5	-2.21328	0.0268785	-1.26822	0.204718	-2.46179	0.0341296	-1.46687
ZMYND8	-1.99963	0.0455405	-1.5535	0.120304	-2.51244	0.0340056	-1.46845
MLXIP	-2.1693	0.0300601	-1.34201	0.179594	-2.48287	0.033588	-1.47382
FOXJ3	-1.49321	0.135383	-2.07768	0.0377385	-2.525	0.0320687	-1.49392
NFE2L2	-1.68268	0.0924369	-1.92296	0.0544853	-2.54957	0.0316846	-1.49915
ELK4	-1.56246	0.118179	-2.02976	0.042381	-2.54009	0.0315368	-1.50118
L3MBTL4	-2.07456	0.0380269	-1.51454	0.129889	-2.53788	0.0311694	-1.50627
ZNF287	-1.02824	0.303838	-2.41305	0.0158196	-2.43336	0.0304631	-1.51623
VAV1	-1.90339	0.0569898	-1.7304	0.0835582	-2.56948	0.0302247	-1.51964
SPEN	-1.94647	0.0515985	-1.70125	0.0888966	-2.57932	0.0292855	-1.53335
TULP4	-1.98377	0.0472811	-1.67447	0.0940383	-2.58677	0.0285257	-1.54476
BAZ2A	-2.17769	0.029429	-1.49159	0.135806	-2.59458	0.0260673	-1.5839
GAS7	-2.32037	0.0203211	-1.30924	0.190452	-2.56652	0.025367	-1.59573
FLI1	-1.84362	0.0652382	-1.88785	0.0590467	-2.63855	0.0252664	-1.59746
ZNF76	-1.6408	0.100839	-2.08477	0.0370902	-2.63437	0.0246425	-1.60832
TAL2	-0.858896	0.390398	-2.59239	0.00953128	-2.44042	0.0245353	-1.61021
STAT5A	-2.18411	0.0289538	-1.52051	0.128383	-2.61956	0.0245141	-1.61058
NFATC2	-1.98005	0.0476975	-1.76784	0.0770877	-2.65016	0.0242884	-1.6146
RUNX1T1	-1.30247	0.192755	-2.36587	0.0179877	-2.59391	0.023107	-1.63626
ZC3HAV1	-2.17539	0.029601	-1.57013	0.116385	-2.64848	0.0229817	-1.63862
PHTF1	-1.58773	0.112348	-2.17093	0.0299362	-2.65778	0.0225165	-1.6475
STAT4	-2.13007	0.0331656	-1.642	0.10059	-2.66726	0.0223619	-1.65049
ZFYVE1	-1.75881	0.0786096	-2.03358	0.0419944	-2.68162	0.0221623	-1.65439
KLF12	-1.8078	0.0706384	-2.00669	0.0447823	-2.69725	0.021372	-1.67016
TSC22D1	-1.93915	0.0524835	-1.89745	0.0577685	-2.71288	0.0206125	-1.68587
IRF1	-2.15126	0.0314556	-1.66729	0.0954572	-2.70012	0.0204429	-1.68946
CREBL2	-1.58213	0.11362	-2.23591	0.0253579	-2.69976	0.0197346	-1.70477
GMEB1	-0.963484	0.335305	-2.62874	0.00857017	-2.54009	0.0196906	-1.70574
ETS1	-2.07098	0.0383608	-1.80976	0.0703331	-2.7441	0.0186575	-1.72915
TSC22D3	-1.99351	0.0462055	-1.90137	0.0572537	-2.7541	0.0183459	-1.73646
RARA	-1.95945	0.05006	-1.93935	0.0524586	-2.75687	0.0182309	-1.73919
POU4F2	-2.20817	0.0272327	-1.67099	0.0947243	-2.74297	0.0179543	-1.74583
ZDHHC21	-1.30946	0.190378	-2.47092	0.0134766	-2.67313	0.0178712	-1.74785
JARID2	-1.87524	0.060759	-2.04981	0.040383	-2.77543	0.0172004	-1.76446
AHR	-2.11618	0.0343294	-1.84539	0.0649804	-2.80126	0.0158503	-1.79996
MAPK8IP1	-2.05428	0.0399485	-1.91393	0.0556285	-2.80595	0.0157986	-1.80138
ANKZF1	-2.41743	0.0156307	-1.48985	0.136264	-2.76286	0.0152324	-1.81723
TARDBP	-1.60452	0.108599	-2.33761	0.0194075	-2.78751	0.0150953	-1.82116
TRIM22	-2.15853	0.0308869	-1.82808	0.0675372	-2.81896	0.0149619	-1.82501
NCOR1	-1.96119	0.0498571	-2.05518	0.0398618	-2.84	0.0143508	-1.84312
LEF1	-2.09482	0.0361867	-1.92525	0.0541983	-2.84262	0.0141881	-1.84808
IRF9	-2.21577	0.0267072	-1.84804	0.0645967	-2.87355	0.0127016	-1.89614
ELF1	-2.08981	0.0366349	-1.99602	0.0459315	-2.88912	0.0124307	-1.90551
ZNF684	-1.04772	0.294766	-2.80158	0.00508536	-2.72187	0.0112469	-1.94897
APP	-2.56712	0.0102546	-1.45782	0.144891	-2.84606	0.0111611	-1.95229
MAFB	-2.48289	0.0130322	-1.58764	0.112369	-2.87829	0.0110216	-1.95775
MIER1	-1.58711	0.112487	-2.48498	0.0129559	-2.87941	0.0109756	-1.95957
ZBTB48	-1.75881	0.07861	-2.39294	0.0167138	-2.93573	0.0100311	-1.99865
ZNF624	-1.52213	0.127978	-2.56731	0.010249	-2.89167	0.0100164	-1.99929
ZNF540	-1.83129	0.0670575	-2.35391	0.0185773	-2.95938	0.00957732	-2.01876
RLF	-1.289	0.197398	-2.74346	0.00607953	-2.85138	0.00927109	-2.03287
ZNF25	-2.06834	0.0386084	-2.15823	0.03091	-2.98863	0.00922602	-2.03499
NFE2L1	-2.4118	0.0158741	-1.80019	0.0718303	-2.97833	0.0088671	-2.05222
ZNF804A	-1.35822	0.174393	-2.72665	0.00639811	-2.88844	0.00870113	-2.06042
TFEC	-2.08852	0.0367513	-2.17837	0.0293785	-3.01714	0.0084552	-2.07288
ZZEF1	-2.59991	0.00932478	-1.57303	0.115712	-2.95072	0.00845034	-2.07313
HAND1	-2.00566	0.0448923	-2.31988	0.0203474	-3.05862	0.00730596	-2.13632
IRF8	-2.40623	0.016118	-1.94201	0.0521354	-3.07468	0.00679121	-2.16805
HMX1	-2.18158	0.0291403	-2.2252	0.026068	-3.11606	0.00621582	-2.2065
POU2F2	-2.66268	0.00775205	-1.6794	0.0930732	-3.07032	0.00594101	-2.22614
PPARD	-2.71721	0.00658351	-1.62761	0.103608	-3.07225	0.00565489	-2.24758
HCLS1	-2.61055	0.00903958	-1.82417	0.0681259	-3.13583	0.00516838	-2.28665
PEG3	-2.16471	0.0304097	-2.33081	0.0197634	-3.17881	0.00505855	-2.29597
ZBTB8A	-1.62457	0.104255	-2.77602	0.00550291	-3.11168	0.00485548	-2.31377
CSRNP2	-1.84681	0.0647752	-2.64328	0.00821079	-3.17497	0.00454159	-2.34279
NFAT5	-2.72641	0.00640266	-1.73907	0.0820231	-3.15757	0.00449112	-2.34765
SUPT6H	-2.56087	0.010441	-1.95923	0.0500853	-3.1962	0.00447429	-2.34928
TFEB	-2.0934	0.0363134	-2.44756	0.0143829	-3.21094	0.00446939	-2.34975
TRERF1	-2.25038	0.0244249	-2.329	0.0198591	-3.23811	0.00418664	-2.37813
SCMH1	-2.12566	0.0335319	-2.45589	0.0140535	-3.23965	0.004081	-2.38923
HOXC8	-2.43219	0.015008	-2.16341	0.0305093	-3.24958	0.00397851	-2.40028
FOXJ2	-2.0268	0.0426829	-2.55328	0.0106713	-3.23861	0.00396003	-2.4023
ZBTB40	-2.45226	0.0141961	-2.17162	0.0298845	-3.26958	0.00371858	-2.42962
HDAC1	-2.03061	0.042295	-2.61752	0.00885708	-3.28672	0.00333015	-2.47754
SPIC	-1.86521	0.0621523	-2.74852	0.0059865	-3.2624	0.00331013	-2.48015
BHLHE41	-2.83038	0.00464925	-1.79254	0.0730473	-3.2689	0.00305236	-2.51536
C5orf41	-1.90446	0.0568499	-2.75069	0.00594693	-3.29169	0.00304011	-2.51711
LASS5	-2.32477	0.0200843	-2.4043	0.0162033	-3.34396	0.00293876	-2.53184
SALL4	-2.28936	0.0220583	-2.44285	0.0145718	-3.34618	0.0029066	-2.53662
ZNF438	-2.17653	0.0295154	-2.56253	0.0103912	-3.35103	0.00278779	-2.55474
ARNT	-2.14471	0.0319761	-2.62953	0.00855035	-3.3759	0.00251658	-2.59919
PBX1	-2.30864	0.0209634	-2.50304	0.0123132	-3.40237	0.00239079	-2.62146
IRF2	-2.06029	0.0393704	-2.72242	0.00648062	-3.38189	0.00236613	-2.62596
ZMYM6	-1.99145	0.0464312	-2.78826	0.00529924	-3.37977	0.00229072	-2.64003
CRTC2	-1.88629	0.0592562	-2.90763	0.00364183	-3.38981	0.00203741	-2.69092
RORB	-1.69882	0.0893538	-3.0401	0.00236497	-3.35092	0.00199953	-2.69907
L3MBTL1	-2.75412	0.00588497	-2.11308	0.0345942	-3.44163	0.00193395	-2.71356
ZFP36L2	-2.49089	0.0127425	-2.42227	0.015424	-3.47412	0.00187395	-2.72724
TBX19	-2.55253	0.0106944	-2.3675	0.0179088	-3.47898	0.00183106	-2.7373
DMAP1	-2.24922	0.0244984	-2.66755	0.00764068	-3.47668	0.00179386	-2.74621
SOX4	-2.54534	0.0109171	-2.41857	0.0155819	-3.51001	0.0016465	-2.78344
ZBTB46	-2.15894	0.0308545	-2.81171	0.00492791	-3.51478	0.00148875	-2.82718
ZFAND2B	-2.6774	0.00741952	-2.39516	0.0166132	-3.58684	0.00123277	-2.90912
ZDHHC14	-3.1217	0.00179808	-1.83699	0.0662117	-3.50632	0.00119481	-2.9227
NR3C1	-2.20181	0.0276784	-2.89097	0.00384059	-3.60114	0.00107888	-2.96703
TOX2	-2.33329	0.0196327	-2.78945	0.00527979	-3.62233	0.00105465	-2.97689
ZNF34	-2.10369	0.0354059	-2.9853	0.00283302	-3.59845	0.00102385	-2.98976
ZMYND12	-2.2947	0.0217506	-2.84278	0.0044722	-3.63274	0.000995879	-3.00179
GPBP1L1	-2.60416	0.00920994	-2.57689	0.00996942	-3.66356	0.000945329	-3.02442
KLF11	-1.95915	0.0500949	-3.17585	0.00149398	-3.631	0.000785839	-3.10467
PURA	-2.69583	0.00702142	-2.56011	0.010464	-3.71651	0.000772824	-3.11192
AFF3	-2.55786	0.0105319	-2.74495	0.00605203	-3.74965	0.000679507	-3.16781
ZEB2	-3.04832	0.00230126	-2.25915	0.0238742	-3.75295	0.000593868	-3.22631
TFAP2B	-2.42685	0.0152308	-2.94764	0.00320209	-3.80034	0.000532981	-3.27329
PHF1	-2.76361	0.0057166	-2.83731	0.00454947	-3.96045	0.000300572	-3.52205
ATF7	-2.71785	0.00657083	-2.97062	0.00297198	-4.02235	0.000231287	-3.63585
HIVEP3	-3.0328	0.00242295	-2.67142	0.00755312	-4.03349	0.000217937	-3.66167
ZNF800	-2.16222	0.0306012	-3.43796	0.000586122	-3.95992	0.000213954	-3.66968
ZCCHC12	-2.53193	0.0113438	-3.21105	0.00132251	-4.0609	0.000181637	-3.7408
BAZ2B	-2.94577	0.00322154	-2.83379	0.00459988	-4.08677	0.000179597	-3.7457
ZNF362	-2.65638	0.00789857	-3.12517	0.00177704	-4.08817	0.000170874	-3.76732
ZNF423	-2.19775	0.0279672	-3.49971	0.000465766	-4.02871	0.000159552	-3.7971
THRA	-2.47417	0.0133546	-3.30614	0.000945895	-4.0873	0.000155113	-3.80935
MYC	-2.0776	0.0377463	-3.59202	0.000328129	-4.00902	0.000152331	-3.81721
ZNF483	-2.72327	0.00646386	-3.13752	0.00170386	-4.1442	0.000136748	-3.86408
TBX20	-2.80061	0.00510068	-3.09101	0.00199479	-4.166	0.00012714	-3.89572
RERE	-3.03359	0.00241659	-2.89824	0.00375267	-4.19444	0.000114362	-3.94172
HOXC6	-2.82048	0.00479525	-3.12056	0.00180508	-4.20095	0.000109559	-3.96035
STAT2	-2.77588	0.00550521	-3.20463	0.00135235	-4.22886	9.53546e-05	-4.02066
HOXC9	-3.15646	0.00159697	-2.87374	0.00405642	-4.264	8.3871e-05	-4.07639
ZCCHC17	-2.67142	0.00755308	-3.38498	0.000711831	-4.28252	7.06124e-05	-4.15112
HIVEP1	-2.86887	0.00411939	-3.23019	0.00123707	-4.31269	6.72007e-05	-4.17263
SCML4	-2.60977	0.00906043	-3.46214	0.000535899	-4.29349	6.42642e-05	-4.19203
KLF7	-3.04188	0.00235109	-3.08461	0.00203823	-4.33208	6.34878e-05	-4.19731
ZFYVE27	-3.00563	0.00265029	-3.2207	0.0012788	-4.40268	4.60757e-05	-4.33653
GRHL1	-2.92239	0.00347357	-3.40966	0.000650446	-4.47743	3.16321e-05	-4.49987
BCL6	-3.22642	0.00125349	-3.13456	0.00172115	-4.49789	3.03048e-05	-4.51849
PLAGL1	-3.333	0.000859148	-3.03991	0.00236648	-4.50633	2.86796e-05	-4.54243
IKZF2	-3.09886	0.00194267	-3.3121	0.000925977	-4.53323	2.55949e-05	-4.59185
ZFAND3	-3.07244	0.0021232	-3.37559	0.00073658	-4.55944	2.24707e-05	-4.64838
ARNTL	-3.0503	0.00228614	-3.40545	0.000660547	-4.5649	2.17505e-05	-4.66253
TRPS1	-3.58183	0.000341193	-2.94075	0.00327423	-4.61216	1.64273e-05	-4.78443
RORA	-3.3732	0.000742995	-3.38335	0.00071608	-4.7776	8.21824e-06	-5.08522
ZNF436	-2.99651	0.00273094	-3.73226	0.000189773	-4.75795	8.01888e-06	-5.09589
JAZF1	-3.21359	0.00131087	-3.57497	0.000350274	-4.80023	7.16016e-06	-5.14508
PRDM2	-3.36247	0.000772471	-3.50042	0.000464526	-4.8528	5.68407e-06	-5.24534
ZFPM2	-3.39167	0.000694688	-3.51697	0.000436505	-4.88514	4.85441e-06	-5.31386
TCF7L2	-3.52307	0.000426582	-3.40912	0.000651729	-4.9018	4.47482e-06	-5.34922
ZBTB4	-3.49514	0.000473807	-3.44318	0.000574919	-4.90613	4.39001e-06	-5.35753
ZNF641	-3.13775	0.00170251	-3.81479	0.000136297	-4.91619	3.77688e-06	-5.42287
HIVEP2	-3.27181	0.0010686	-3.73922	0.00018459	-4.95755	3.2426e-06	-5.48911
ZDHHC18	-3.5884	0.000332716	-3.50312	0.000459841	-5.01446	2.55394e-06	-5.59279
FOXP1	-3.08953	0.00200471	-4.10318	4.0751e-05	-5.08602	1.41496e-06	-5.84926
CASZ1	-3.34665	0.000817943	-3.98813	6.65972e-05	-5.18647	9.6556e-07	-6.01522
CAMTA1	-3.24096	0.00119127	-4.22962	2.34084e-05	-5.2825	5.12964e-07	-6.28991
TSHZ2	-3.52064	0.00043051	-4.07151	4.671e-05	-5.36846	3.76485e-07	-6.42425
ZNF365	-3.73198	0.000189982	-3.90174	9.55045e-05	-5.39785	3.41562e-07	-6.46653
ZBTB20	-3.65497	0.000257212	-4.08018	4.50004e-05	-5.46958	2.23095e-07	-6.65151
EBF1	-3.85623	0.000115151	-4.10025	4.127e-05	-5.62608	9.58283e-08	-7.01851
CHD5	-3.58275	0.000339996	-4.44525	8.77886e-06	-5.67665	6.15753e-08	-7.21059
SOX6	-4.28401	1.83558e-05	-3.87492	0.00010666	-5.76923	4.1215e-08	-7.38494
ZBTB16	-4.78059	1.74778e-06	-3.30257	0.000958017	-5.71566	3.55104e-08	-7.44964
STAT3	-4.34571	1.38829e-05	-4.32587	1.5193e-05	-6.13173	4.91019e-09	-8.3089
ZHX2	-4.83318	1.34369e-06	-4.49046	7.10697e-06	-6.59281	2.51865e-10	-9.59883
