# Supplementary material for: Cross-Cohort Analysis Identifies a TEAD4–MYCN Positive Feedback Loop as the Core Regulatory Element of High-Risk Neuroblastoma
Source: Oxford University Press journal article supplement (doi:10.1158/2159-8290.cd-16-0861), 2018-03-06
Supplement: 21598290cd160861-sup-169577_3_supp_4574643_p49g29.xlsx [file 21598290cd160861-sup-169577_3_supp_4574643_p49g29.xlsx]

## Sheet: pooled shRNA
geneSymbol	n.shRNAs	z.MYCNAmp.inVitro	log2FC.Mesenchymal.inVitro	log2FC.MYCNAmp.inVitro	log2FC.MYCNAmpVsControl.inVitro	z.MYCNAmp.inVivo	log2FC.Control.inVivo	log2FC.MYCNAmp.inVivo	log2FC.MYCNAmpVsControl.inVivo
E2F1	4	-2.13249	-0.985864	-2.33411	-1.34824	-1.05522	-2.02881	-2.89092	-0.862114
E2F3	5	-1.98543	-0.40779	-2.20155	-1.79376	-2.40984	0.00912027	-2.44032	-2.44944
ECSIT	5	-4.1073	-1.56444	-4.46648	-2.90205	-3.20589	-3.61495	-5.60174	-1.9868
ELK1	5	-1.65225	-0.600487	-2.0396	-1.43911	-3.23725	-1.31193	-4.66885	-3.35693
HMGB2	5	-2.10147	-0.558134	-3.11497	-2.55684	-2.97805	-1.09359	-3.81142	-2.71783
HNRNPAB	5	-3.35096	-1.15511	-2.5543	-1.39919	-4.09928	-1.31302	-5.13207	-3.81905
MYB	3	-2.49211	-1.17803	-2.20066	-1.02263	-1.06731	-2.29261	-3.4992	-1.20659
MYBL2	5	-2.70664	-1.74229	-2.16511	-0.422816	-2.10277	-4.12178	-3.19101	0.930769
MYCN	5	-3.85156	-2.31525	-4.21638	-1.90113	-2.99394	-3.06091	-4.02322	-0.962311
NME2	5	-3.59996	-1.21434	-1.5825	-0.368166	-1.36688	-2.10413	-2.90883	-0.804701
PRDM8	3	-2.71104	-1.90578	-5.10093	-3.19515	-2.8547	-3.67367	-4.50133	-0.827661
PTTG1	4	-3.28064	-3.30405	-2.56548	0.738565	-2.51458	-5.25188	-4.27128	0.9806
RCOR2	5	-3.22376	-1.00172	-2.50962	-1.50791	-2.18138	-2.00692	-2.93658	-0.929659
TAF1D	5	-2.83123	-1.23631	-3.63858	-2.40228	-1.83026	-1.95089	-2.28555	-0.334667
TCF3	4	-1.48075	-0.70714	-1.53507	-0.827931	-0.701182	-0.912924	-2.72496	-1.81204
TEAD4	4	-2.89263	-1.55455	-3.95182	-2.39727	-2.53232	-1.44857	-2.9969	-1.54833
TFAP4	5	-4.30247	-1.66756	-4.51125	-2.84369	-4.22699	-4.26795	-5.36106	-1.09311
TP53	4	-2.89669	-1.64259	-2.49594	-0.853348	-3.56906	-2.48181	-6.77245	-4.29064
TRIM28	5	-1.05135	-1.68466	-1.21826	0.466407	-1.34982	-2.14206	-0.951899	1.19016
UHRF1	5	-3.02684	-0.77002	-2.4048	-1.63478	-0.802384	-1.65261	-2.68447	-1.03185
ZNF219	5	-1.58513	-2.09949	-1.5844	0.515084	-2.45364	-3.04696	-3.60651	-0.559556
ZNF239	5	-2.01238	-1.23033	-1.71759	-0.487254	-1.34636	-1.52509	-2.70248	-1.17739
ZNF581	5	-1.50052	-0.178434	-2.3234	-2.14496	-2.68293	-0.681642	-4.02953	-3.34788
ZNF695	5	-2.85968	-1.00915	-1.59423	-0.585072	-1.73916	-2.4135	-3.37982	-0.966319
ZNF8	5	-2.15864	-1.70442	-2.4542	-0.749783	-3.74683	-2.7228	-4.95206	-2.22926
NegControl	2	0.551888	0.712245	0.502972	-0.209273	-1.57017	-1.87235	-2.2818	-0.409449

## Sheet: pooled shRNA sequences
Symbol	TRC Number	Sequence
E2F1	TRCN0000000249	CCGGTAACTGCACTTTCGGCCCTTTCTCGAGAAAGGGCCGAAAGTGCAGTTATTTTT
E2F1	TRCN0000000251	CCGGCATCCAGCTCATTGCCAAGAACTCGAGTTCTTGGCAATGAGCTGGATGTTTTT
E2F1	TRCN0000000252	CCGGTAAGAGCAAACAAGGCCCGATCTCGAGATCGGGCCTTGTTTGCTCTTATTTTT
E2F1	TRCN0000010327	CCGGACATCACCAACGTCCTTGAGCTCGAGCTCAAGGACGTTGGTGATGTCTTTTTG
E2F3	TRCN0000013803	CCGGCCCGCTTTACTCTTCAGGAATCTCGAGATTCCTGAAGAGTAAAGCGGGTTTTT
E2F3	TRCN0000013804	CCGGCCTCATTAAGAAGAAGTCTAACTCGAGTTAGACTTCTTCTTAATGAGGTTTTT
E2F3	TRCN0000013805	CCGGCCAAACTGTTATAGTTGTGAACTCGAGTTCACAACTATAACAGTTTGGTTTTT
E2F3	TRCN0000013806	CCGGCCTGACTCAATAGAGAGCCTACTCGAGTAGGCTCTCTATTGAGTCAGGTTTTT
E2F3	TRCN0000013807	CCGGCCAACTCAGGACATAGCGATTCTCGAGAATCGCTATGTCCTGAGTTGGTTTTT
ECSIT	TRCN0000115852	CCGGGCCCTTTGAGTGTACAGCAAACTCGAGTTTGCTGTACACTCAAAGGGCTTTTTG
ECSIT	TRCN0000115853	CCGGCCCTCGATTCATGAACGTCAACTCGAGTTGACGTTCATGAATCGAGGGTTTTTG
ECSIT	TRCN0000115854	CCGGCCGCAACAAGTGTGTGTATTACTCGAGTAATACACACACTTGTTGCGGTTTTTG
ECSIT	TRCN0000115855	CCGGCACCATCTACCAGGTTCCTTTCTCGAGAAAGGAACCTGGTAGATGGTGTTTTTG
ECSIT	TRCN0000115856	CCGGTCCGCAACAAGTGTGTGTATTCTCGAGAATACACACACTTGTTGCGGATTTTTG
ELK1	TRCN0000007450	CCGGCCCAAGAGTAACTCTCATTATCTCGAGATAATGAGAGTTACTCTTGGGTTTTT
ELK1	TRCN0000007451	CCGGCCCAAGGAAGAGTTGGAAGTTCTCGAGAACTTCCAACTCTTCCTTGGGTTTTT
ELK1	TRCN0000007453	CCGGCCTGCTTCCTACGCATACATTCTCGAGAATGTATGCGTAGGAAGCAGGTTTTT
ELK1	TRCN0000237873	CCGGGAGAGGGTTTGTGCCAGAAACCTCGAGGTTTCTGGCACAAACCCTCTCTTTTTG
ELK1	TRCN0000237872	CCGGCCCTGCTTCCTACGCATACATCTCGAGATGTATGCGTAGGAAGCAGGGTTTTTG
HMGB2	TRCN0000019009	CCGGGCTCAATACTAGCTTCAGTATCTCGAGATACTGAAGCTAGTATTGAGCTTTTT
HMGB2	TRCN0000019010	CCGGGCAAAGGAGAAGTCGAAGTTTCTCGAGAAACTTCGACTTCTCCTTTGCTTTTT
HMGB2	TRCN0000019011	CCGGGCAGCTAAGCTAAAGGAGAAACTCGAGTTTCTCCTTTAGCTTAGCTGCTTTTT
HMGB2	TRCN0000019012	CCGGGCCAAAGATAAACAACCATATCTCGAGATATGGTTGTTTATCTTTGGCTTTTT
HMGB2	TRCN0000019013	CCGGCCATCTGCCTTCTTCCTGTTTCTCGAGAAACAGGAAGAAGGCAGATGGTTTTT
HNRNPAB	TRCN0000074521	CCGGTGAGGCCATTGAATTGCCAATCTCGAGATTGGCAATTCAATGGCCTCATTTTTG
HNRNPAB	TRCN0000074522	CCGGTGAATTGCCAATGGATCCAAACTCGAGTTTGGATCCATTGGCAATTCATTTTTG
HNRNPAB	TRCN0000331353	CCGGGGCCGTGTCATTGACCCTAAACTCGAGTTTAGGGTCAATGACACGGCCTTTTTG
HNRNPAB	TRCN0000304175	CCGGGGTCGTTGACTGTACAATAAACTCGAGTTTATTGTACAGTCAACGACCTTTTTG
HNRNPAB	TRCN0000300637	CCGGTGGAAGCAAGTGTGAGATCAACTCGAGTTGATCTCACACTTGCTTCCATTTTTG
MYB	TRCN0000040058	CCGGCCAGATTGTAAATGCTCATTTCTCGAGAAATGAGCATTTACAATCTGGTTTTTG
MYB	TRCN0000040060	CCGGGCTCCTAATGTCAACCGAGAACTCGAGTTCTCGGTTGACATTAGGAGCTTTTTG
MYB	TRCN0000288599	CCGGCCAGATTGTAAATGCTCATTTCTCGAGAAATGAGCATTTACAATCTGGTTTTTG
MYB	TRCN0000009853	CCGGAACAGAATGGAACAGATGACCTCGAGGTCATCTGTTCCATTCTGTTCTTTTTG
MYBL2	TRCN0000020519	CCGGGCTAACAACAAAGTTCCACTTCTCGAGAAGTGGAACTTTGTTGTTAGCTTTTT
MYBL2	TRCN0000020520	CCGGGCTTGGTGTGACCTGAGTAAACTCGAGTTTACTCAGGTCACACCAAGCTTTTT
MYBL2	TRCN0000020521	CCGGCCCAGATCAGAAGTACTCCATCTCGAGATGGAGTACTTCTGATCTGGGTTTTT
MYBL2	TRCN0000020522	CCGGGACAGTATCAACAACAGCCTACTCGAGTAGGCTGTTGTTGATACTGTCTTTTT
MYBL2	TRCN0000020523	CCGGCTGGCTCTTGACATTGTGGATCTCGAGATCCACAATGTCAAGAGCCAGTTTTT
MYCN	TRCN0000020695	CCGGCAGCAGCAGTTGCTAAAGAAACTCGAGTTTCTTTAGCAACTGCTGCTGTTTTT
MYCN	TRCN0000020697	CCGGGCGTCGCAGAAACCACAACATCTCGAGATGTTGTGGTTTCTGCGACGCTTTTT
MYCN	TRCN0000020698	CCGGCTGAGCGATTCAGATGATGAACTCGAGTTCATCATCTGAATCGCTCAGTTTTT
MYCN	TRCN0000358381	CCGGCACCTCCATGACAGCGCTAAACTCGAGTTTAGCGCTGTCATGGAGGTGTTTTTG
MYCN	TRCN0000358465	CCGGCTTCTACCCGGACGAAGATGACTCGAGTCATCTTCGTCCGGGTAGAAGTTTTTG
NME2	TRCN0000318404	CCGGGAAATCAGCCTATGGTTTAAGCTCGAGCTTAAACCATAGGCTGATTTCTTTTTG
NME2	TRCN0000349498	CCGGAGCACTACATTGACCTGAAAGCTCGAGCTTTCAGGTCAATGTAGTGCTTTTTTG
NME2	TRCN0000318433	CCGGGACTTCTGCATTCAGGTTGGCCTCGAGGCCAACCTGAATGCAGAAGTCTTTTTG
NME2	TRCN0000381107	GTACCGGACCAATCCAGCAGATTCAAAGCTCGAGCTTTGAATCTGCTGGATTGGTTTTTTTG
NME2	TRCN0000379743	GTACCGGATTCATGGCAGTGATTCAGTACTCGAGTACTGAATCACTGCCATGAATTTTTTTG
PRDM8	TRCN0000016761	CCGGCAGAACCTTGAAGCCTACATACTCGAGTATGTAGGCTTCAAGGTTCTGTTTTT
PRDM8	TRCN0000358530	CCGGGACTTCACAGCGCTGATATAACTCGAGTTATATCAGCGCTGTGAAGTCTTTTTG
PRDM8	TRCN0000358531	CCGGGGCACATGACCTCGCATAATTCTCGAGAATTATGCGAGGTCATGTGCCTTTTTG
PRDM8	TRCN0000367872	CCGGAGAACCTTGAAGCCTACATAACTCGAGTTATGTAGGCTTCAAGGTTCTTTTTTG
PTTG1	TRCN0000015105	CCGGCCAATCTGTTGCAGTCTCCTTCTCGAGAAGGAGACTGCAACAGATTGGTTTTT
PTTG1	TRCN0000319033	CCGGCCTTACCTAAAGCTACTAGAACTCGAGTTCTAGTAGCTTTAGGTAAGGTTTTTG
PTTG1	TRCN0000319032	CCGGCCTTCAATCAAAGCCTTAGATCTCGAGATCTAAGGCTTTGATTGAAGGTTTTTG
PTTG1	TRCN0000319034	CCGGCCCTTCAATCCTCTAGACTTTCTCGAGAAAGTCTAGAGGATTGAAGGGTTTTTG
PTTG1	TRCN0000319035	CCGGCCAATCTGTTGCAGTCTCCTTCTCGAGAAGGAGACTGCAACAGATTGGTTTTTG
RCOR2	TRCN0000122645	CCGGGCCAAGCTTGACAAGTACATTCTCGAGAATGTACTTGTCAAGCTTGGCTTTTTTG
RCOR2	TRCN0000143126	CCGGCAGCCTGGTGAAATACTACTACTCGAGTAGTAGTATTTCACCAGGCTGTTTTTTG
RCOR2	TRCN0000139665	CCGGCAAGGAGAAGCATGGCTACAACTCGAGTTGTAGCCATGCTTCTCCTTGTTTTTTG
RCOR2	TRCN0000139311	CCGGCTGGAAGAGAAGCTCTGTCTTCTCGAGAAGACAGAGCTTCTCTTCCAGTTTTTTG
RCOR2	TRCN0000140683	CCGGCCTTTGGGTTCTGCATGTGTTCTCGAGAACACATGCAGAACCCAAAGGTTTTTTG
TAF1D	TRCN0000134174	CCGGCGAAGTGATAACTCTTCTGATCTCGAGATCAGAAGAGTTATCACTTCGTTTTTTG
TAF1D	TRCN0000134377	CCGGGTGATTCATCAAGTGACTCATCTCGAGATGAGTCACTTGATGAATCACTTTTTTG
TAF1D	TRCN0000138857	CCGGGAGGATGAGGATGCAACACATCTCGAGATGTGTTGCATCCTCATCCTCTTTTTTG
TAF1D	TRCN0000137470	CCGGGAAAGTGTTCACGCAAGTGATCTCGAGATCACTTGCGTGAACACTTTCTTTTTTG
TAF1D	TRCN0000218656	GTACCGGCTTCTGATAGCAGCTTATTTACTCGAGTAAATAAGCTGCTATCAGAAGTTTTTTG
TCF3	TRCN0000017534	CCGGCCCGGATCACTCAAGCAATAACTCGAGTTATTGCTTGAGTGATCCGGGTTTTT
TCF3	TRCN0000017535	CCGGCAGCCTCTCTTCATCCACATTCTCGAGAATGTGGATGAAGAGAGGCTGTTTTT
TCF3	TRCN0000274216	CCGGACGGCCTGCAGAGTAAGATAGCTCGAGCTATCTTACTCTGCAGGCCGTTTTTTG
TCF3	TRCN0000274217	CCGGATTGTGCCTAAGCGAAATATTCTCGAGAATATTTCGCTTAGGCACAATTTTTTG
TCF3	TRCN0000274218	CCGGCCCGGATCACTCAAGCAATAACTCGAGTTATTGCTTGAGTGATCCGGGTTTTTG
TEAD4	TRCN0000015873	CCGGGAAGAGACGTGTGTGCAGGAACTCGAGTTCCTGCACACACGTCTCTTCTTTTT
TEAD4	TRCN0000015875	CCGGGAGACAGAGTATGCTCGCTATCTCGAGATAGCGAGCATACTCTGTCTCTTTTT
TEAD4	TRCN0000015876	CCGGCCTTTCTCTCAGCAAACCTATCTCGAGATAGGTTTGCTGAGAGAAAGGTTTTT
TEAD4	TRCN0000015877	CCGGGCTGTGCATTGCCTATGTCTTCTCGAGAAGACATAGGCAATGCACAGCTTTTT
TEAD4	TRCN0000274171	CCGGTGGACAAGCCCATCGACAATGCTCGAGCATTGTCGATGGGCTTGTCCATTTTTG
TFAP4	TRCN0000019784	CCGGCGATGTCATTTGGGTCTCTTTCTCGAGAAAGAGACCCAAATGACATCGTTTTT
TFAP4	TRCN0000019787	CCGGGCAGAGCATCAACGCGGGATTCTCGAGAATCCCGCGTTGATGCTCTGCTTTTT
TFAP4	TRCN0000432340	CCGGAGCAGACAGCCGAGTACATCTCTCGAGAGATGTACTCGGCTGTCTGCTTTTTTTG
TFAP4	TRCN0000420688	CCGGCACACAGCTCAAGCGCTTCATCTCGAGATGAAGCGCTTGAGCTGTGTGTTTTTTG
TFAP4	TRCN0000019785	CCGGCCTCGGTCATCAACTCTGTTTCTCGAGAAACAGAGTTGATGACCGAGGTTTTT
TP53	TRCN0000003753	CCGGCGGCGCACAGAGGAAGAGAATCTCGAGATTCTCTTCCTCTGTGCGCCGTTTTT
TP53	TRCN0000003754	CCGGTCAGACCTATGGAAACTACTTCTCGAGAAGTAGTTTCCATAGGTCTGATTTTT
TP53	TRCN0000003755	CCGGGTCCAGATGAAGCTCCCAGAACTCGAGTTCTGGGAGCTTCATCTGGACTTTTT
TP53	TRCN0000003756	CCGGCACCATCCACTACAACTACATCTCGAGATGTAGTTGTAGTGGATGGTGTTTTT
TP53	TRCN0000342259	CCGGGTCCAGATGAAGCTCCCAGAACTCGAGTTCTGGGAGCTTCATCTGGACTTTTTG
TRIM28	TRCN0000017998	CCGGCCTGGCTCTGTTCTCTGTCCTCTCGAGAGGACAGAGAACAGAGCCAGGTTTTT
TRIM28	TRCN0000017999	CCGGGAGAATTATTTCATGCGTGATCTCGAGATCACGCATGAAATAATTCTCTTTTT
TRIM28	TRCN0000018000	CCGGGAGGACTACAACCTTATTGTTCTCGAGAACAATAAGGTTGTAGTCCTCTTTTT
TRIM28	TRCN0000018001	CCGGCTGAGACCAAACCTGTGCTTACTCGAGTAAGCACAGGTTTGGTCTCAGTTTTT
TRIM28	TRCN0000018002	CCGGGACCACCAGTACCAGTTCTTACTCGAGTAAGAACTGGTACTGGTGGTCTTTTT
UHRF1	TRCN0000004352	CCGGCCGCACCAAGGAATGTACCATCTCGAGATGGTACATTCCTTGGTGCGGTTTTT
UHRF1	TRCN0000004355	CCGGTGTGAAATACTGGCCCGAGAACTCGAGTTCTCGGGCCAGTATTTCACATTTTT
UHRF1	TRCN0000273313	CCGGCGTCATTTACCACGTGAAATACTCGAGTATTTCACGTGGTAAATGACGTTTTTG
UHRF1	TRCN0000273315	CCGGATGTGGGATGAGACGGAATTGCTCGAGCAATTCCGTCTCATCCCACATTTTTTG
UHRF1	TRCN0000273256	CCGGGCCTTTGATTCGTTCCTTCTTCTCGAGAAGAAGGAACGAATCAAAGGCTTTTTG
ZNF219	TRCN0000353582	CCGGCGCTTCCGCTTCAACTCTATCCTCGAGGATAGAGTTGAAGCGGAAGCGTTTTTG
ZNF219	TRCN0000353583	CCGGCCATAGGCGTGAGAGTTTATTCTCGAGAATAAACTCTCACGCCTATGGTTTTTG
ZNF219	TRCN0000369361	CCGGCACAAGGCCTCCTTCGATCATCTCGAGATGATCGAAGGAGGCCTTGTGTTTTTG
ZNF219	TRCN0000377280	CCGGCGATTAGCTTAGTGAGCTTACCTCGAGGTAAGCTCACTAAGCTAATCGTTTTTG
ZNF219	TRCN0000329984	CCGGGCTCAGCACATCACCTCAAAGCTCGAGCTTTGAGGTGATGTGCTGAGCTTTTTG
ZNF239	TRCN0000013163	CCGGGCACTTTGTTATGCTGTACAACTCGAGTTGTACAGCATAACAAAGTGCTTTTT
ZNF239	TRCN0000423521	CCGGAGAGAGATGTAAGGGTTATTTCTCGAGAAATAACCCTTACATCTCTCTTTTTTTG
ZNF239	TRCN0000417338	CCGGAGGTCTTCACAGCGCTCATACCTCGAGGTATGAGCGCTGTGAAGACCTTTTTTTG
ZNF239	TRCN0000436413	CCGGATCCTCGCTAACTGACATTAGCTCGAGCTAATGTCAGTTAGCGAGGATTTTTTTG
ZNF239	TRCN0000426557	CCGGTAGTCAGCAGAGAGCTCATACCTCGAGGTATGAGCTCTCTGCTGACTATTTTTTG
ZNF581	TRCN0000108104	CCGGCTCAAGGGTCTTCGAGTACATCTCGAGATGTACTCGAAGACCCTTGAGTTTTTG
ZNF581	TRCN0000419005	CCGGCATCACCCACTCGGAGGTAAACTCGAGTTTACCTCCGAGTGGGTGATGTTTTTTG
ZNF581	TRCN0000425746	CCGGTAAAGTCTCTGGCCTCATAAACTCGAGTTTATGAGGCCAGAGACTTTATTTTTTG
ZNF581	TRCN0000436712	CCGGACACTGCCCTCGCCGCTTTATCTCGAGATAAAGCGGCGAGGGCAGTGTTTTTTTG
ZNF581	TRCN0000429103	CCGGACAGAGCAGCCGCATCTCAAACTCGAGTTTGAGATGCGGCTGCTCTGTTTTTTTG
ZNF695	TRCN0000107473	CCGGCCAAACACTCAGCTTTGTCTTCTCGAGAAGACAAAGCTGAGTGTTTGGTTTTTG
ZNF695	TRCN0000435421	CCGGGGTTCAACACCTCCACTTATACTCGAGTATAAGTGGAGGTGTTGAACCTTTTTTG
ZNF695	TRCN0000425057	CCGGTAACCTGTGCTCAGTTCTTACCTCGAGGTAAGAACTGAGCACAGGTTATTTTTTG
ZNF695	TRCN0000422099	CCGGTTGTTGTCATACCTTACTCAACTCGAGTTGAGTAAGGTATGACAACAATTTTTTG
ZNF695	TRCN0000430531	CCGGACAGCAGAGAATCCATATTGGCTCGAGCCAATATGGATTCTCTGCTGTTTTTTTG
ZNF8	TRCN0000108078	CCGGCCAGCTCTCACAAAGCATGAACTCGAGTTCATGCTTTGTGAGAGCTGGTTTTTG
ZNF8	TRCN0000108079	CCGGGTGCAGGACAAACCCTACAAACTCGAGTTTGTAGGGTTTGTCCTGCACTTTTTG
ZNF8	TRCN0000236571	CCGGGTGCCCTCTTTAGCGACATATCTCGAGATATGTCGCTAAAGAGGGCACTTTTTG
ZNF8	TRCN0000236569	CCGGGAAGCGACAGACCCTTCAAATCTCGAGATTTGAAGGGTCTGTCGCTTCTTTTTG
ZNF8	TRCN0000236570	CCGGGATTACAGACTCAGAACATAACTCGAGTTATGTTCTGAGTCTGTAATCTTTTTG
Control	TRC1.5 pLKO.1-puro Non-Mammalian shRNA	CCGGCAACAAGATGAAGAGCACCAACTCGAGTTGGTGCTCTTCATCTTGTTGTTTTT

## Sheet: shRNA-effect on cell viability
	Relative Cell viability
Cell lines	MYCN amplified					Control					MYCN amplified					Control
shRNA	BE2 T96	IMR5 T72	IMR32 T96	NB1 T96	LAN1 T96	SY5Y T72	SKNAS T96	SKNF1 T96	Average MYCN-amp	Average Control	BE2 error (s.d)	IMR5 error (s.d)	IMR32 error (s.d)	NB1 error (s.d)	LAN1 error (s.d)	SY5Y error (s.d)	SKNAS error (s.d)	SKNF1 error (s.d)
E2F1 sh1	0.88	0.62	0.62	0.72	0.88	0.4	0.6	0.81	0.75	0.6	0.05	0.17	0.08	0.05	0.02	0.07	0.27	0.07
E2F1 sh2	0.66	0.78	0.16	0.48	0.82	0.91	0.46	0.72	0.58	0.69	0.03	0.09	0.04	0.07	0.02	0.08	0.04	0.05
E2F3 sh1	0.88	0.77	0.41	1.19	0.97	0.9	0.83	0.93	0.84	0.89	0.03	0.17	0.18	0.02	0.04	0.09	0.06	0.05
E2F3 sh2	0.79	0.19	0.22	0.45	0.88	0.38	0.89	0.74	0.51	0.67	0.08	0.27	0.08	0.08	0.01	0.03	0.05	0.06
ECSIT sh1	0.88	0.3	0.4	0.96	1.1	1.38	0.89	0.85	0.73	1.04	0.06	0.17	0.27	0.03	0.01	0.07	0.07	0.08
ECSIT sh2	0.63	0.41	0.17	0.23	0.65	0.56	0.65	0.72	0.42	0.64	0.05	0.12	0.05	0.1	0.06	0.05	0.32	0.05
ELK1 sh1	1.11	0.41	0.9	1.27	1.2	1.14	1.07	0.85	0.98	1.02	0.14	0.23	0.11	0.13	0.02	0.09	0.26	0.06
ELK1 sh2	0.98	1.19	0.73	1.01	1.1	1.04	1.05	0.69	1	0.92	0.07	0.08	0.02	0.05	0.05	0.06	0.04	0.06
HMGB2 sh1	0.86	0.62	0.33	0.43	0.65	0.67	0.77	0.72	0.58	0.72	0.16	0.1	0.05	0.04	0.04	0.12	0.33	0.08
HMGB2 sh2	0.87	0.73	0.75	1.14	0.97	0.64	0.73	0.98	0.89	0.78	0.1	0.1	0.05	0.09	0.02	0.1	0.19	0.06
HNRNPAB sh1	0.73	0.38	0.9	0.85	0.82	0.83	0.85	0.89	0.74	0.86	0.16	0.14	0.02	0.01	0.02	0.04	0.1	0.04
HNRNPAB sh2	0.88	0.44	0.56	0.98	0.99	1.92	0.95	0.8	0.77	1.22	0.12	0.16	0.03	0.07	0.04	0.12	0.08	0.06
MYB sh1	1.12	0.9	1.24	1.5	1	1.39	1.11	0.95	1.15	1.15	0.07	0.08	0.23	0.12	0.02	0.08	0.15	0.07
MYB sh2	1.2	1.1	1.28	1.41	1.09	1.23	1.07	0.95	1.21	1.08	0.14	0.1	0.1	0.08	0.02	0.03	0.16	0.01
MYBL2 sh1	0.77	0.34	0.31	1.34	0.79	0.78	0.65	0.88	0.71	0.77	0.18	0.14	0.05	0.09	0.03	0.04	0.03	0.05
MYBL2 sh2	0.86	0.47	0.35	0.54	0.88	0.6	0.66	0.7	0.62	0.65	0.22	0.14	0.04	0.08	0.03	0.06	0.08	0.02
MYCN sh1	0.88	1.02	0.64	1.17	0.99	0.67	0.82	1.04	0.94	0.84	0.06	0.09	0.09	0.08	0.02	0.06	0.07	0.09
MYCN sh2	0.85	0.82	0.57	1.17	1.02	1.5	0.65	1.08	0.89	1.08	0.01	0.19	0.06	0.05	0.03	0.06	0.14	0.07
NME1 sh1	1.18	0.68	1.03	1.2	1.05	1.09	1.08	0.95	1.03	1.04	0.12	0.15	0.14	0.02	0.03	0.03	0.01	0.03
NME1 sh2	0.58	0.24	0.29	0.68	0.85	0.46	0.8	0.7	0.53	0.65	0.02	0.23	0	0.08	0.01	0.08	0.04	0.05
PRDM8 sh1	0.43	0.27	0.16	0.47	0.81	0.18	0.67	0.65	0.43	0.5	0	0.19	0.05	0.26	0.08	0.03	0.29	0.05
PRDM8 sh2	0.53	0.2	0.13	0.08	0.77	0.17	0.63	0.83	0.34	0.54	0.02	0.41	0.01	0.14	0.03	0.04	0.31	0.08
PTTG1 sh1	0.34	0.1	0.15	0.31	0.51	0.71	0.22	0.54	0.28	0.49	0.04	0.43	0.02	0.19	0.02	0.06	0.22	0.08
PTTG1 sh2	0.5	0.23	0.12	0.51	0.5	0.46	0.42	0.6	0.37	0.49	0.09	0.25	0.04	0.23	0.02	0.06	0.22	0.05
RCOR2 sh1	0.77	0.54	0.24	0.49	0.83	0.8	0.76	1.01	0.57	0.86	0.03	0.13	0.09	0.07	0.02	0	0.11	0.06
RCOR2 sh2	0.53	0.17	0.35	0.7	0.72	0.35	0.61	0.7	0.49	0.56	0.05	0.24	0.03	0.08	0.07	0.08	0.33	0.03
TAF1D sh1	0.75	0.26	0.15	1.28	0.79	0.87	0.93	0.93	0.65	0.91	0.06	0.24	0.05	0.1	0.01	0.03	0.03	0.12
TAF1D sh2	0.57	0.32	0.27	0.62	1.04	1.01	0.76	0.97	0.57	0.91	0.13	0.24	0.04	0.12	0.02	0.1	0.33	0.05
TCF3 sh1	0.73	0.48	0.29	0.1	0.86	0.37	0.59	0.73	0.49	0.56	0.02	0.15	0.15	0.07	0.01	0.1	0.18	0.05
TCF3 sh2	0.88	0.72	0.56	0.85	1	0.98	0.73	0.89	0.8	0.86	0.01	0.11	0.17	0.02	0.03	0.04	0.04	0.05
TEAD4 sh1	0.92	0.5	0.51	0.62	0.9	0.93	0.86	0.83	0.69	0.87	0.07	0.17	0.12	0.12	0.01	0.06	0.09	0.07
TEAD4 sh2	0.42	0.33	0.11	0.11	0.5	0.43	0.51	0.65	0.29	0.53	0.05	0.15	0.06	0.13	0.03	0.05	0.21	0.05
TFAP4 sh1	0.69	0.7	1.01	0.83	0.91	0.79	0.67	0.82	0.83	0.76	0.06	0.13	0.14	0.03	0.03	0.08	0.08	0.05
TFAP4 sh2	0.74	1.17	1.15	0.89	0.74	1.07	1.02	0.86	0.94	0.99	0.08	0.09	0.2	0.1	0.02	0.04	0.15	0.05
TP53 sh1	0.48	0.88	1.62	1.36	1.09	1.75	0.75	0.95	1.09	1.15	0.04	0.12	0.03	0.08	0.06	0.04	0.06	0.09
TP53 sh2	0.55	1.24	1.5	1.07	0.95	1.54	0.68	0.95	1.06	1.06	0.05	0.1	0.15	0.05	0.01	0.05	0.08	0.08
TRIM28 sh1	0.72	0.58	0.97	0.83	0.93	0.65	0.55	0.85	0.81	0.68	0.01	0.15	0.19	0.03	0.03	0.03	0.05	0.06
TRIM28 sh2	0.79	0.22	0.15	0.78	0.88	0.54	0.79	0.75	0.56	0.69	0.03	0.33	0.01	0.13	0.06	0.03	0.15	0.05
UHRF1 sh1	1.06	0.34	0.64	0.77	1.03	0.6	0.85	0.96	0.77	0.8	0.25	0.22	0.21	0.05	0.03	0.05	0.08	0.06
UHRF1 sh2	0.82	0.89	0.49	1	1.02	0.91	0.96	0.99	0.84	0.95	0.09	0.09	0.03	0.07	0.07	0.07	0.01	0.07
ZNF219 sh1	0.88	0.23	1.14	1.19	1.11	0.67	0.81	0.98	0.91	0.82	0.07	0.32	0.19	0.14	0.03	0.02	0.11	0.05
ZNF219 sh2	0.63	0.3	0.3	0.71	0.59	0.5	0.56	0.71	0.51	0.59	0.04	0.18	0.04	0.08	0.02	0.05	0.26	0.06
ZNF239 sh1	0.9	0.57	0.8	0.38	1.03	0.64	0.9	0.86	0.74	0.8	0.18	0.21	0.26	0.17	0.03	0.05	0.13	0.06
ZNF239 sh2	0.76	0.87	0.26	1.05	0.7	1.04	0.86	0.82	0.73	0.91	0.1	0.11	0.1	0.06	0.02	0.09	0.22	0.04
ZNF581 sh1	1.16	0.74	1.37	1.37	1.27	0.93	0.99	1.05	1.18	0.99	0.04	0.17	0.34	0.05	0.05	0.05	0.01	0.05
ZNF581 sh2	0.77	1.15	0.7	0.86	0.74	1.07	1.06	0.76	0.84	0.96	0.03	0.08	0.11	0.02	0.02	0.04	0.14	0.05
ZNF695 sh1	1.13	0.94	1.31	0.95	1.05	1.19	0.8	0.99	1.08	1	0.08	0.08	0.05	0.1	0.03	0.04	0.14	0.06
ZNF695 sh2	0.62	0.42	0.25	0.16	0.66	0.3	0.61	0.58	0.42	0.5	0.05	0.14	0.07	0.09	0.04	0.06	0.18	0.04
ZNF8 sh1	0.74	0.36	0.33	0.43	0.95	0.57	0.71	0.83	0.56	0.7	0.06	0.13	0.05	0.08	0.02	0.1	0.12	0.05
ZNF8 sh2	1.04	0.93	0.71	1.03	1.08	0.95	1.01	0.65	0.96	0.87	0.23	0.12	0.11	0.1	0.05	0.13	0.11	0.06
PLK1 sh	0.48	0.29	0.15	0.3	0.74	0.57	0.58	0.68	0.39	0.61	0.05	0.19	0.03	0.07	0.08	0.1	0.11	0.03

## Sheet: shRNA sequences
Symbol	TRC Number	Sequence
E2F1 sh1	TRCN0000010327	CCGGACATCACCAACGTCCTTGAGCTCGAGCTCAAGGACGTTGGTGATGTCTTTTTG
E2F1 sh2	TRCN0000010328	CCGGCTACTCAGCCTGGAGCAAGAACTCGAGTTCTTGCTCCAGGCTGAGTAGTTTTTG
E2F3 sh1	TRCN0000013806	CCGGCCTGACTCAATAGAGAGCCTACTCGAGTAGGCTCTCTATTGAGTCAGGTTTTT
E2F3 sh2	TRCN0000013807	CCGGCCAACTCAGGACATAGCGATTCTCGAGAATCGCTATGTCCTGAGTTGGTTTTT
ECSIT sh1	TRCN0000115852	CCGGGCCCTTTGAGTGTACAGCAAACTCGAGTTTGCTGTACACTCAAAGGGCTTTTTG
ECSIT sh2	TRCN0000115853	CCGGCCCTCGATTCATGAACGTCAACTCGAGTTGACGTTCATGAATCGAGGGTTTTTG
ELK1 sh1	TRCN0000237872	CCGGCCCTGCTTCCTACGCATACATCTCGAGATGTATGCGTAGGAAGCAGGGTTTTTG
ELK1 sh2	TRCN0000007453	CCGGCCTGCTTCCTACGCATACATTCTCGAGAATGTATGCGTAGGAAGCAGGTTTTT
HMGB2 sh1	TRCN0000019009	CCGGGCTCAATACTAGCTTCAGTATCTCGAGATACTGAAGCTAGTATTGAGCTTTTT
HMGB2 sh2	TRCN0000019013	CCGGCCATCTGCCTTCTTCCTGTTTCTCGAGAAACAGGAAGAAGGCAGATGGTTTTT
HNRNPAB sh1	TRCN0000331353	CCGGGGCCGTGTCATTGACCCTAAACTCGAGTTTAGGGTCAATGACACGGCCTTTTTG
HNRNPAB sh2	TRCN0000304175	CCGGGGTCGTTGACTGTACAATAAACTCGAGTTTATTGTACAGTCAACGACCTTTTTG
MYBL2 sh1	TRCN0000020519	CCGGGCTAACAACAAAGTTCCACTTCTCGAGAAGTGGAACTTTGTTGTTAGCTTTTT
MYBL2 sh2	TRCN0000020521	CCGGCCCAGATCAGAAGTACTCCATCTCGAGATGGAGTACTTCTGATCTGGGTTTTT
MYCN sh1	TRCN0000020698	CCGGCTGAGCGATTCAGATGATGAACTCGAGTTCATCATCTGAATCGCTCAGTTTTT
MYCN sh2	TRCN0000020696	CCGGCGGACGAAGATGACTTCTACTCTCGAGAGTAGAAGTCATCTTCGTCCGTTTTT
NME2 sh1	TRCN0000318404	CCGGGAAATCAGCCTATGGTTTAAGCTCGAGCTTAAACCATAGGCTGATTTCTTTTTG
NME2 sh2	TRCN0000349498	CCGGAGCACTACATTGACCTGAAAGCTCGAGCTTTCAGGTCAATGTAGTGCTTTTTTG
PRDM8 sh1	TRCN0000358530	CCGGGACTTCACAGCGCTGATATAACTCGAGTTATATCAGCGCTGTGAAGTCTTTTTG
PRDM8 sh2	TRCN0000016761	CCGGCAGAACCTTGAAGCCTACATACTCGAGTATGTAGGCTTCAAGGTTCTGTTTTT
PTTG1 sh1	TRCN0000015105	CCGGCCAATCTGTTGCAGTCTCCTTCTCGAGAAGGAGACTGCAACAGATTGGTTTTT
PTTG1 sh2	TRCN0000319033	CCGGCCTTACCTAAAGCTACTAGAACTCGAGTTCTAGTAGCTTTAGGTAAGGTTTTTG
RCOR2 sh1	TRCN0000122645	CCGGGCCAAGCTTGACAAGTACATTCTCGAGAATGTACTTGTCAAGCTTGGCTTTTTTG
RCOR2 sh2	TRCN0000143126	CCGGCAGCCTGGTGAAATACTACTACTCGAGTAGTAGTATTTCACCAGGCTGTTTTTTG
TAF1D sh1	TRCN0000134174	CCGGCGAAGTGATAACTCTTCTGATCTCGAGATCAGAAGAGTTATCACTTCGTTTTTTG
TAF1D sh2	TRCN0000218656	GTACCGGCTTCTGATAGCAGCTTATTTACTCGAGTAAATAAGCTGCTATCAGAAGTTTTTTG
TCF3 sh1	TRCN0000017534	CCGGCCCGGATCACTCAAGCAATAACTCGAGTTATTGCTTGAGTGATCCGGGTTTTT
TCF3 sh2	TRCN0000274217	CCGGATTGTGCCTAAGCGAAATATTCTCGAGAATATTTCGCTTAGGCACAATTTTTTG
TEAD4 sh1	TRCN0000015876	CCGGCCTTTCTCTCAGCAAACCTATCTCGAGATAGGTTTGCTGAGAGAAAGGTTTTT
TEAD4 sh2	TRCN0000015877	CCGGGCTGTGCATTGCCTATGTCTTCTCGAGAAGACATAGGCAATGCACAGCTTTTT
TFAP4 sh1	TRCN0000019784	CCGGCGATGTCATTTGGGTCTCTTTCTCGAGAAAGAGACCCAAATGACATCGTTTTT
TFAP4 sh2	TRCN0000420688	CCGGCACACAGCTCAAGCGCTTCATCTCGAGATGAAGCGCTTGAGCTGTGTGTTTTTTG
TP53 sh1	TRCN0000003754	CCGGTCAGACCTATGGAAACTACTTCTCGAGAAGTAGTTTCCATAGGTCTGATTTTT
TP53 sh2	TRCN0000342259	CCGGGTCCAGATGAAGCTCCCAGAACTCGAGTTCTGGGAGCTTCATCTGGACTTTTTG
TRIM28 sh1	TRCN0000017998	CCGGCCTGGCTCTGTTCTCTGTCCTCTCGAGAGGACAGAGAACAGAGCCAGGTTTTT
TRIM28 sh1	TRCN0000017998	CCGGCCTGGCTCTGTTCTCTGTCCTCTCGAGAGGACAGAGAACAGAGCCAGGTTTTT
TRIM28 sh2	TRCN0000018001	CCGGCTGAGACCAAACCTGTGCTTACTCGAGTAAGCACAGGTTTGGTCTCAGTTTTT
TRIM28 sh2	TRCN0000018001	CCGGCTGAGACCAAACCTGTGCTTACTCGAGTAAGCACAGGTTTGGTCTCAGTTTTT
UHRF1 sh1	TRCN0000004352	CCGGCCGCACCAAGGAATGTACCATCTCGAGATGGTACATTCCTTGGTGCGGTTTTT
UHRF1 sh2	TRCN0000273315	CCGGATGTGGGATGAGACGGAATTGCTCGAGCAATTCCGTCTCATCCCACATTTTTTG
ZNF219 sh1	TRCN0000369361	CCGGCACAAGGCCTCCTTCGATCATCTCGAGATGATCGAAGGAGGCCTTGTGTTTTTG
ZNF219 sh2	TRCN0000329984	CCGGGCTCAGCACATCACCTCAAAGCTCGAGCTTTGAGGTGATGTGCTGAGCTTTTTG
ZNF239 sh1	TRCN0000436413	CCGGATCCTCGCTAACTGACATTAGCTCGAGCTAATGTCAGTTAGCGAGGATTTTTTTG
ZNF239 sh2	TRCN0000423521	CCGGAGAGAGATGTAAGGGTTATTTCTCGAGAAATAACCCTTACATCTCTCTTTTTTTG
ZNF581 sh1	TRCN0000108104	CCGGCTCAAGGGTCTTCGAGTACATCTCGAGATGTACTCGAAGACCCTTGAGTTTTTG
ZNF581 sh2	TRCN0000419005	CCGGCATCACCCACTCGGAGGTAAACTCGAGTTTACCTCCGAGTGGGTGATGTTTTTTG
ZNF695 sh1	TRCN0000107473	CCGGCCAAACACTCAGCTTTGTCTTCTCGAGAAGACAAAGCTGAGTGTTTGGTTTTTG
ZNF695 sh2	TRCN0000107470	CCGGCCAGAAGCAGAAGCATGTAAACTCGAGTTTACATGCTTCTGCTTCTGGTTTTTG
ZNF8 sh1	TRCN0000108079	CCGGGTGCAGGACAAACCCTACAAACTCGAGTTTGTAGGGTTTGTCCTGCACTTTTTG
ZNF8 sh2	TRCN0000108078	CCGGCCAGCTCTCACAAAGCATGAACTCGAGTTCATGCTTTGTGAGAGCTGGTTTTTG

## Sheet: siRNA-effect on cell viability
	Relative Cell Viability
Cell lines	MYCN-amplified			Control				MYCN-amplified			Control
siRNA	IMR5 T96	SKNBE2 T96	SKNDZ T96	SY5Y T96	SKNAS T96	Average MYCN-amplified	Average Control	IMR5 error (s.d)	BE2 error (s.d)	SKNDZ error (s.d)	SY5Y error (s.d)	SKNAS error (s.d)
si E2F1	0.945075	0.80148	0.915111	1.10456	0.856498	0.887222	0.980529	0.102846	0.172694	0.0292316	0.0770627	0.187639
si E2F3	0.960399	1.05034	0.835491	1.07477	1.10038	0.948745	1.08757	0.112971	0.152844	0.0212864	0.0906861	0.120042
si ECSIT	0.961633	0.654013	0.896983	1.09671	0.833269	0.837543	0.964989	0.0482075	0.215588	0.0256606	0.0891112	0.0827268
si ELK1	0.779038	0.764051	0.832687	1.0095	0.691308	0.791925	0.850402	0.144503	0.188762	0.0412583	0.101559	0.111101
si HMGB2	0.938678	0.885753	0.908327	1.1623	1.26872	0.910919	1.21551	0.0939255	0.175285	0.0382026	0.0803936	0.0762968
si HNRNPAB	0.664796	0.467667	0.935657	1.04204	0.845357	0.689373	0.943697	0.106352	0.150868	0.074038	0.0929553	0.0812268
si MYB	0.957819	0.836361	0.945039	1.15763	1.10698	0.913073	1.1323	0.0544977	0.158698	0.0237694	0.0764237	0.077159
si MYBL2	0.546597	0.654207	0.982692	0.901778	0.979821	0.727832	0.9408	0.0217246	0.14846	0.0215629	0.0761447	0.072177
si MYCN	1.32295	0.698974	1.04379	1.12905	1.02932	1.02191	1.07918	0.0193223	0.173619	0.0356002	0.075557	0.141708
si NME2	1.25847	0.734985	0.812608	1.00303	1.01066	0.935354	1.00684	0.0270395	0.166391	0.0875755	0.0819981	0.123537
si PRDM8	0.847462	0.715612	0.926189	1.07464	1.17805	0.829754	1.12634	0.0630013	0.185119	0.0338244	0.108356	0.0840033
si PTTG1	1.15166	0.722347	0.975221	1.08321	0.886668	0.949741	0.984938	0.0581229	0.148678	0.0268615	0.0848035	0.113097
si RCOR2	1.44992	0.733346	1.01592	1.08292	0.904876	1.0664	0.9939	0.23456	0.175059	0.0323183	0.0758035	0.116544
si TAF1D	1.15374	0.775549	0.983547	1.20742	1.06729	0.970947	1.13736	0.0580033	0.17941	0.0274453	0.08479	0.0749703
si TCF3	1.12878	0.72567	0.915298	1.09179	0.776912	0.92325	0.934353	0.0787504	0.155346	0.0621436	0.0968761	0.0964945
si TEAD4	0.709338	0.748554	0.868223	1.08068	1.14827	0.775372	1.11448	0.0499039	0.189422	0.0314053	0.0908792	0.115431
si TFAP4	0.576921	0.535878	0.602013	0.895784	0.996591	0.571604	0.946188	0.0574039	0.241729	0.0449303	0.0849867	0.12638
si TP53	1.32825	0.803673	0.944886	1.13096	0.624338	1.0256	0.877647	0.027157	0.175274	0.0338476	0.0843317	0.119653
si TRIM28	0.86667	0.791655	0.886139	1.0459	1.11464	0.848154	1.08027	0.0310463	0.174143	0.0302231	0.094831	0.0687235
si UHRF1	0.984817	0.936651	0.889838	1.09591	1.12787	0.937102	1.11189	0.070572	0.148163	0.080141	0.0762243	0.0846011
si ZNF219	0.735694	0.58918	0.78465	0.916662	1.24302	0.703175	1.07984	0.112087	0.153281	0.108504	0.107788	0.132183
si ZNF239	1.03178	0.872915	0.939237	1.02867	1.18452	0.947976	1.10659	0.0887024	0.220997	0.0401864	0.0914085	0.112916
si ZNF581	0.891214	0.725935	0.977811	1.06827	1.04873	0.864987	1.0585	0.0786373	0.154297	0.040418	0.0921435	0.0793808
si ZNF695	0.781625	0.893396	0.894278	1.12123	0.785818	0.856433	0.953523	0.0508929	0.150937	0.0493612	0.0753091	0.0708015
si ZNF8	0.905763	0.884911	0.95179	1.02692	0.816391	0.914155	0.921657	0.0428327	0.176812	0.0222432	0.100718	0.14701
siDeathpool	0.213779	0.234852	0.382276	0.558556	0.0751746	0.276969	0.316865	0.141037	0.182139	0.15424	0.0916989	0.35
PLK1	0.132301	0.294147	0.462317	0.650683	0.140937	0.296255	0.39581	0.114907	0.228173	0.0875831	0.111718	0.21553

## Sheet: siRNA sequences
Gene Symbol	Sequence
E2F1	UCGGAGAACUUUCAGAUCU
E2F1	GAGAAGUCACGCUAUGAGA
E2F1	GAGCAGAUGGUUAUGGUGA
E2F1	GAACAGGGCCACUGACUCU
E2F3	CUUCAUGUGUAGUUGAUUA
E2F3	GAAACACACAGUCCAAUGA
E2F3	CCAUUGAGGUUUACUUAUG
E2F3	AAUCAAAGGUUAGCUUAUG
ECSIT	ACGACAACCUGCAGCGACA
ECSIT	CCGAGGACCACCAGGAAGA
ECSIT	CGACGAUGGCUAAGUGGAU
ECSIT	GUGCAUGGCGGGUGCUCAU
ELK1	GCAAGGCAAUGGCCACAUC
ELK1	CGGAAGAGCUUAAUGUGGA
ELK1	GCCAGAAGUUCGUCUACAA
ELK1	GCAGCAGCCGGAACGAGUA
HMGB2	GCAAAGAAAUUGGGUGAAA
HMGB2	GAACAUCGCCCAAAGAUCA
HMGB2	GAAUAAAUGGCUAUCCUUU
HMGB2	GAAGAAGAACGAACCAGAA
HNRNPAB	GGGAGUACUUUGGCGAGUU
HNRNPAB	UCCCAACACUGGACGGUCA
HNRNPAB	CUGAGAGGCCAUAGCGCCA
HNRNPAB	CCUGGGUGAGUGUGGGAUA
MYB	CCGAAACGUUGGUCUGUUA
MYB	CAGUCAAGCUCGUAAAUAC
MYB	CCAAUUAUCUCCCGAAUCG
MYB	UCCAUACCCUGUAGCGUUA
MYBL2	AAACGAGCCUGCCUUACAA
MYBL2	GAGCACACCUGUUAAGACC
MYBL2	GUAACAGCCUCACGCCCAA
MYBL2	GAACAGGAGCCCAUCGGUA
NME2	GCGAGAUCAUCAAGCGCUU
NME2	GAAAUCAGCCUAUGGUUUA
NME2	AAUAAGAGGUGGACACAAC
NME2	CUGAAGAACACCUGAAGCA
TAF1D	AAAGAAACCCCAUUCGAAA
TAF1D	CCUGUAAGACUGAGUGUAU
TAF1D	GAGAAAUCCUAUAUACUCA
TAF1D	CAUAGUAAGUUCUGAAUUC
TEAD4	GACAGAGUAUGCUCGCUAU
TEAD4	GGACACUACUCUUACCGCA
TEAD4	UCAAGCACCUCCCUGAGAA
TEAD4	CCCAUGAUGUGAAGCCUUU
TFAP4	GGACAAGGACGAAGGCAUA
TFAP4	ACACACAGCUCAAGCGCUU
TFAP4	GAGAGAAGCUCAGCAAGGC
TFAP4	CUCAGAAGGUGCCCUCUUU
TP53	GAAAUUUGCGUGUGGAGUA
TP53	GUGCAGCUGUGGGUUGAUU
TP53	GCAGUCAGAUCCUAGCGUC
TP53	GGAGAAUAUUUCACCCUUC
TRIM28	GAAAUGUGAGCGUGUACUG
TRIM28	GCGAUCUGGUUAUGUGCAA
TRIM28	AGACAGCACUGGCGUGGUG
TRIM28	GAACGAGGCCUUCGGUGAC
UHRF1	GCGGAACAGUCUUGUGAUC
UHRF1	GCCAUACCCUCUUCGACUA
UHRF1	GCAAGGGCAUGGCCUGUGU
UHRF1	GUAAAGUGGAGGAGACGUU
ZNF219	UCAAAGUGCAUCUGCGAGU
ZNF219	CAGGCAAGAUCGACCGCCA
ZNF219	GAUUGUCCUUUCUGCGGAA
ZNF219	CUGUAUGCGGGAAGCGCUU
ZNF239	CAAGAAAGAUCCUCGCUAA
ZNF239	UCAAAGUGGUUGUUUCGAA
ZNF239	GAGAUGUAAGGGUUAUUUA
ZNF239	GGGACAGUGUGAUGACUCU
ZNF581	AGGAGGAAUCCGUGAGUAA
ZNF581	GCUCAAGGGUCUUCGAGUA
ZNF581	GGUAAAGCCCUUCGAGUGU
ZNF581	GAUCAAACAAUAAACACGU
ZNF695	CUUGAGAAAUUACGCUUAA
ZNF695	UUAUAAUGGACUUGACCUA
ZNF695	CAAUACAAAUAGACCGGUU
ZNF695	UACAUUAAGUGAUGCGUAU
ZNF8	GGAGCAAGGGACCGAGCUA
ZNF8	CACUCAAGGAGCAGAAUAA
ZNF8	AAAGCCAGGUGCAGGACAA
ZNF8	AGUCAGGCCAUUCCAAUUA

## Sheet: TAZ shRNA sequence
Symbol	TRC Number	Sequence
TAZ (WWTR1)	TRCN0000019469	GCGATGAATCAGCCTCTGAAT
TAZ (WWTR1)	TRCN0000370007	GCGTTCTTGTGACAGATTATA
