# Supplementary material for: Cross-Cohort Analysis Identifies a TEAD4–MYCN Positive Feedback Loop as the Core Regulatory Element of High-Risk Neuroblastoma
Source: Oxford University Press journal article supplement (doi:10.1158/2159-8290.cd-16-0861), 2018-03-06
Supplement: 21598290cd160861-sup-169577_3_supp_4574645_p49g2y.xlsx [file 21598290cd160861-sup-169577_3_supp_4574645_p49g2y.xlsx]

## Sheet: TEAD4-MYCN KD DGE signature
	shTEAD4 vs control			shMYCN vs control
Gene Symbol	t	p.value	FDR	t	p.value	FDR
1/2-SBSRNA4	2.49055	0.040597	0.103402	2.08159	0.0747372	0.143486
61E3.4	-0.528659	0.612916	0.724319	1.76841	0.11906	0.206368
A1BG	0.409784	0.693863	0.787768	0.476691	0.647687	0.738711
A1BG-AS1	4.35291	0.00311486	0.0152628	5.38498	0.000928934	0.00457645
A1CF	-0.625825	0.550714	0.67508	0.787698	0.455977	0.570136
A2LD1	-0.424741	0.683411	0.779355	1.08381	0.313348	0.430661
A2M	1.29456	0.235378	0.370743	3.17941	0.0149008	0.0404785
A4GALT	-1.05819	0.324118	0.466483	0.344858	0.74004	0.813324
A4GNT	0.903553	0.395409	0.535949	-0.441738	0.671622	0.758596
AAAS	-2.90277	0.0221554	0.0660484	-2.96122	0.020359	0.0518139
AACS	-10.982	9.23654e-06	0.000244932	3.18288	0.0148279	0.0403225
AACSP1	1.39077	0.205698	0.33712	-4.28357	0.00339736	0.0125811
AADAT	6.29116	0.000361009	0.00308257	5.47066	0.000845764	0.00426495
AAGAB	6.61072	0.000264755	0.00247836	-12.6732	3.44087e-06	9.47751e-05
AAK1	-2.19928	0.0626808	0.140889	8.64423	4.65181e-05	0.000520058
AAMP	1.03209	0.335391	0.478277	2.04206	0.0792823	0.150211
AANAT	1.56626	0.160016	0.280189	-3.0635	0.0175756	0.0461248
AARS	-8.07479	7.29794e-05	0.000997647	-9.93007	1.83402e-05	0.000276463
AARS2	-2.28779	0.054915	0.12833	-2.91097	0.0218937	0.0548368
AARSD1	-0.939387	0.377921	0.519134	-2.74892	0.0277257	0.0659201
AASDH	-0.243115	0.814687	0.877693	-4.44594	0.00277548	0.0107673
AASDHPPT	-15.3712	8.94325e-07	5.21088e-05	-16.8074	4.76997e-07	3.01008e-05
AASS	-0.934879	0.380089	0.521139	-0.525757	0.614831	0.711565
AATF	3.25012	0.0134847	0.0454129	5.32806	0.000989197	0.0048151
AATK	3.68379	0.00741905	0.0289423	4.0261	0.00471947	0.0162276
AATK-AS1	2.94149	0.0209475	0.0633828	2.48142	0.041151	0.0895587
ABAT	15.2441	9.4804e-07	5.42198e-05	11.4378	6.98755e-06	0.00014584
ABCA1	-1.08334	0.313541	0.455734	-4.60629	0.00228183	0.00921547
ABCA11P	4.08299	0.0043851	0.0196011	3.22601	0.0139507	0.0383944
ABCA12	-0.53655	0.607725	0.720339	4.67978	0.00208859	0.00857849
ABCA17P	0.953297	0.371291	0.513441	1.68682	0.134237	0.226435
ABCA2	7.49368	0.000118811	0.00141075	3.08247	0.017105	0.0451308
ABCA3	3.78463	0.00648167	0.026257	-5.88871	0.000542484	0.0030588
ABCA4	0.434112	0.676899	0.773775	0.797178	0.450791	0.565167
ABCA5	-1.3068	0.231406	0.366216	1.11992	0.298653	0.415711
ABCA7	2.20896	0.0617797	0.139393	1.91217	0.0962176	0.174454
ABCA8	0.968622	0.364088	0.506794	0.331505	0.749688	0.820078
ABCB1	0.659594	0.530007	0.656827	-9.6174	2.27682e-05	0.000319124
ABCB10	0.36574	0.725052	0.810874	-12.3276	4.16726e-06	0.000105511
ABCB4	-3.35433	0.0116532	0.0406819	-1.00475	0.34753	0.465361
ABCB6	-0.211616	0.838263	0.892566	-2.99498	0.019392	0.0498766
ABCB7	-3.81919	0.00619063	0.0253547	-4.70705	0.00202152	0.00836161
ABCB8	-1.79325	0.114773	0.219134	4.2943	0.00335187	0.0124507
ABCB9	2.6131	0.0338579	0.0903954	1.65784	0.140054	0.233912
ABCC1	0.42461	0.683501	0.779355	-18.9657	2.03047e-07	1.94106e-05
ABCC10	4.163	0.00395779	0.018238	-0.473794	0.649655	0.740351
ABCC11	1.43991	0.191851	0.321117	-0.943821	0.375798	0.492867
ABCC2	5.40521	0.000908509	0.00611183	2.21472	0.0612509	0.122792
ABCC3	1.66861	0.137865	0.25134	3.15643	0.0153946	0.0415713
ABCC4	0.729624	0.488635	0.62066	-3.38339	0.0111914	0.0321962
ABCC5	8.27141	6.22881e-05	0.0008902	8.16317	6.79371e-05	0.000677321
ABCC6	2.03359	0.0802908	0.169151	-1.96717	0.088653	0.163766
ABCC6P2	0.326771	0.75312	0.832177	-0.495145	0.635226	0.728567
ABCC8	1.85537	0.104687	0.205009	0.832424	0.431867	0.547064
ABCC9	-4.62661	0.00222651	0.0117936	10.4415	1.30385e-05	0.000221521
ABCD1	2.83581	0.0244197	0.0711077	-1.32595	0.225308	0.335892
ABCD2	-2.93786	0.0210578	0.0636204	1.23528	0.25545	0.370026
ABCD3	-6.06489	0.000452824	0.0036213	1.29287	0.23593	0.348272
ABCD4	0.114527	0.911944	0.942776	-0.786497	0.456637	0.570687
ABCE1	-0.951902	0.371951	0.513924	-10.1746	1.55505e-05	0.000251004
ABCF1	-1.68567	0.134463	0.246437	-1.73846	0.124431	0.21342
ABCF2	3.54865	0.00891187	0.0333489	-6.41513	0.000319659	0.00206591
ABCF3	0.536193	0.607959	0.720522	-13.2189	2.56738e-06	7.87054e-05
ABCG1	4.04089	0.00462996	0.0203748	-4.52781	0.00251019	0.00992737
ABCG2	-1.91321	0.0960701	0.191999	-2.81652	0.0251162	0.0610655
ABCG4	-3.26435	0.0132174	0.0447447	2.12646	0.0698892	0.136248
ABCG5	0.950117	0.372798	0.514665	1.23469	0.255655	0.370244
ABCG8	0.470146	0.652137	0.754456	0.398145	0.702047	0.783943
ABHD1	0.358948	0.729913	0.814605	-0.284084	0.784329	0.846694
ABHD10	-3.51395	0.00934548	0.0345448	-9.21341	3.03884e-05	0.00038576
ABHD11	-4.36675	0.00306159	0.0150464	1.95456	0.0903349	0.166164
ABHD12	-2.57406	0.0358693	0.0942548	-2.59787	0.0346288	0.0781522
ABHD12B	0.968158	0.364305	0.506942	0.617214	0.556072	0.661185
ABHD13	-1.96097	0.0894758	0.182517	2.81376	0.0252175	0.0612383
ABHD14A	2.94536	0.0208307	0.0630924	0.0452319	0.965149	0.97491
ABHD14B	1.79567	0.114362	0.218496	1.85168	0.105262	0.186925
ABHD15	-0.426309	0.682319	0.7786	2.33465	0.0512047	0.106674
ABHD16A	1.36316	0.213859	0.346501	-0.713469	0.497987	0.609132
ABHD16B	-0.817752	0.439676	0.576312	1.72464	0.126988	0.216804
ABHD2	-4.20071	0.00377234	0.0176013	-12.5747	3.63207e-06	9.81091e-05
ABHD3	-8.58628	4.86432e-05	0.000758576	-3.29842	0.0126002	0.0353978
ABHD4	-1.57943	0.156992	0.276628	3.36935	0.011412	0.0326809
ABHD5	0.79496	0.452001	0.587964	2.17337	0.0651565	0.12886
ABHD6	2.18922	0.0636306	0.142333	-0.343202	0.741234	0.814045
ABHD8	-0.724092	0.491825	0.623393	7.31891	0.000138387	0.0011241
ABI1	-0.985426	0.356313	0.499416	1.29431	0.235458	0.347717
ABI2	0.745533	0.479538	0.612658	9.18149	3.11039e-05	0.000392938
ABI3	-0.399451	0.701126	0.792744	-1.25766	0.247707	0.36146
ABI3BP	2.10706	0.0719457	0.155888	-0.058987	0.954564	0.968098
ABL1	-3.65603	0.00770204	0.0297842	0.69567	0.508426	0.61857
ABL2	-3.3226	0.0121809	0.0421062	-0.901384	0.396487	0.513006
ABLIM1	1.68445	0.134704	0.246753	5.49673	0.00082213	0.00416657
ABLIM2	2.50658	0.0396423	0.101505	-1.40246	0.202326	0.309551
ABLIM3	2.57593	0.0357702	0.0940915	1.0867	0.312149	0.429467
ABP1	-1.53555	0.167276	0.289749	0.424128	0.683838	0.769132
ABR	1.45628	0.187427	0.315952	-4.33368	0.00319055	0.0119837
ABT1	0.40071	0.70024	0.792138	-2.67551	0.0308818	0.0715523
ABTB1	-1.53225	0.168076	0.290725	4.99538	0.00144094	0.00643291
ABTB2	-3.9021	0.00554859	0.0233436	-6.99419	0.000185158	0.00138234
ACAA1	-4.43726	0.00280535	0.0140685	-0.68368	0.515535	0.625086
ACAA2	-0.413329	0.691379	0.785782	-4.76253	0.00189228	0.00794698
ACACA	-3.19279	0.0146213	0.0483387	-2.15255	0.0672163	0.132111
ACACB	2.10592	0.0720688	0.156099	2.63178	0.0329373	0.0752127
ACAD10	1.7274	0.126472	0.235374	-2.01491	0.0825613	0.154922
ACAD11	0.93676	0.379183	0.520373	-1.16468	0.281225	0.397635
ACAD8	4.7829	0.00184714	0.010313	5.9586	0.00050474	0.00290645
ACAD9	-5.85387	0.000562463	0.00426931	-1.09612	0.308274	0.425384
ACADL	0.0945271	0.927263	0.952949	-0.298382	0.773826	0.839793
ACADM	-3.69685	0.00728975	0.0285402	-5.64237	0.000702853	0.00367794
ACADS	1.06923	0.319442	0.461389	0.515227	0.621807	0.717051
ACADSB	-5.30936	0.00100993	0.00660655	7.24844	0.000147285	0.00117383
ACADVL	1.52477	0.169896	0.293253	1.48299	0.180405	0.283701
ACAN	-1.77333	0.118199	0.22364	-0.672358	0.522307	0.630772
ACAP1	2.91702	0.0217024	0.0650072	1.65002	0.141664	0.235865
ACAP2	0.844611	0.425456	0.564546	1.01039	0.344999	0.462803
ACAP3	-1.14243	0.289779	0.430876	2.07585	0.0753802	0.144413
ACAT1	-1.55523	0.162591	0.283851	-7.43616	0.000124888	0.00104563
ACAT2	-11.6386	6.19866e-06	0.000189913	5.71211	0.000652659	0.00348244
ACBD3	-1.36601	0.213003	0.345536	1.9008	0.0978584	0.17673
ACBD4	3.18897	0.0147005	0.0485538	-0.493047	0.636637	0.729736
ACBD5	-2.27747	0.0557678	0.129593	-23.2429	4.78437e-08	9.53836e-06
ACBD6	-1.76155	0.120269	0.226508	-12.2125	4.44675e-06	0.000109685
ACBD7	-6.70652	0.00024178	0.00233545	0.48238	0.643833	0.73593
ACCN1	6.59997	0.000267483	0.00249619	6.14193	0.000418922	0.00251672
ACCN2	10.225	1.50368e-05	0.00034471	23.2349	4.79614e-08	9.53836e-06
ACCN3	1.3205	0.22703	0.361368	1.92762	0.0940312	0.17147
ACCN4	4.70375	0.00202951	0.0110133	1.99245	0.085375	0.159122
ACCS	0.034332	0.973543	0.983662	-0.258539	0.803214	0.862267
ACCSL	1.52866	0.168947	0.291919	3.28284	0.0128785	0.0359906
ACD	-8.2495	6.33877e-05	0.000900253	0.0744341	0.942688	0.961318
ACE	2.02527	0.0812943	0.170648	-3.81628	0.00621456	0.0201512
ACE2	-1.29319	0.235826	0.371112	-2.11656	0.0709314	0.137851
ACER2	-2.19473	0.0631086	0.141463	5.52709	0.000795518	0.00405659
ACER3	-3.77238	0.00658835	0.0265938	1.6494	0.141792	0.235985
ACHE	0.277194	0.789409	0.85963	-1.56571	0.160143	0.259054
ACIN1	4.46763	0.00270231	0.0136611	-2.81377	0.0252173	0.0612383
ACLY	-6.80889	0.000219662	0.00218688	1.9206	0.095019	0.172789
ACMSD	1.11454	0.300805	0.442565	1.4475	0.18979	0.294838
ACN9	-4.86505	0.00167676	0.00959756	-7.16493	0.000158672	0.00124278
ACO1	-0.132659	0.898089	0.932695	-1.71871	0.128099	0.218289
ACO2	-5.01797	0.00140393	0.0084287	-1.2209	0.260533	0.375295
ACOT1	0.77746	0.461625	0.596819	-1.9316	0.0934765	0.170819
ACOT11	-1.36656	0.212841	0.345406	0.337609	0.745272	0.816704
ACOT13	0.385924	0.710685	0.800173	2.17092	0.0653956	0.129192
ACOT2	1.41747	0.198068	0.328023	-2.32866	0.051664	0.107435
ACOT4	-0.449766	0.666087	0.764879	-0.658865	0.530449	0.638315
ACOT6	1.61724	0.1486	0.265808	-0.867032	0.413839	0.52995
ACOT7	-1.33578	0.222232	0.355944	0.476149	0.648056	0.739038
ACOT8	0.958556	0.368807	0.511328	0.46961	0.652502	0.742897
ACOT9	0.23311	0.822155	0.881905	0.450686	0.665454	0.753397
ACOX1	-10.8592	9.97552e-06	0.000258695	-2.15192	0.0672796	0.13221
ACOX3	6.35507	0.000338993	0.00295506	5.36565	0.000948928	0.00465476
ACOXL	0.618263	0.555417	0.679071	2.36318	0.0490705	0.103259
ACP1	0.283771	0.78456	0.855939	1.04676	0.329018	0.44656
ACP2	-1.77676	0.117601	0.222904	2.57042	0.0360633	0.0805895
ACP5	1.2423	0.252998	0.390694	0.365218	0.725425	0.80255
ACP6	5.01485	0.00140897	0.00845337	1.09863	0.307247	0.424393
ACPL2	4.98258	0.0014624	0.00867088	-12.9567	2.95107e-06	8.625e-05
ACPP	-4.85138	0.00170387	0.0097099	-3.28813	0.0127833	0.035785
ACPT	-0.708656	0.500796	0.631037	0.42603	0.682513	0.767833
ACRBP	2.37018	0.0485611	0.117471	1.3896	0.206038	0.313883
ACRC	1.49376	0.177641	0.303166	0.563458	0.590204	0.690299
ACRV1	-3.81803	0.00620017	0.0253858	-1.54638	0.164682	0.264372
ACSBG1	0.503531	0.629604	0.737758	-0.137074	0.89472	0.92955
ACSBG2	-1.12767	0.295575	0.436566	0.172747	0.867599	0.908832
ACSF2	-0.0932322	0.928256	0.953646	1.17838	0.27606	0.39256
ACSF3	0.0913639	0.92969	0.954687	-5.46777	0.000848427	0.00427601
ACSL1	-2.71362	0.0291992	0.0808672	-3.70169	0.00724242	0.0227313
ACSL3	-0.596551	0.569052	0.690584	1.8617	0.103709	0.184818
ACSL4	-2.82063	0.024966	0.0722473	-0.599262	0.567339	0.67072
ACSL5	-1.39	0.205921	0.337308	0.971015	0.362973	0.480274
ACSL6	0.514705	0.622154	0.732048	0.51956	0.618931	0.714873
ACSM3	1.42448	0.196108	0.3259	0.491091	0.637953	0.730864
ACSM4	1.91699	0.0955307	0.191241	0.980516	0.358572	0.47601
ACSS1	3.76826	0.00662469	0.026697	-7.05929	0.000174515	0.00132464
ACSS2	-0.346765	0.738666	0.821097	6.59617	0.000268454	0.00182193
ACTA1	1.53537	0.167321	0.289758	1.17754	0.276372	0.392809
ACTA2	2.1649	0.065986	0.146456	10.2553	1.47372e-05	0.000242828
ACTB	-2.35153	0.0499308	0.119827	2.39956	0.0464808	0.0988275
ACTC1	0.421859	0.685419	0.781021	2.06424	0.0766986	0.14643
ACTG1	7.08568	0.000170397	0.00182644	-11.4014	7.14228e-06	0.000147416
ACTG2	1.91553	0.0957388	0.191572	5.59991	0.000735512	0.0038148
ACTL6A	-10.4774	1.27376e-05	0.000307105	-3.14602	0.0156239	0.042022
ACTL6B	-2.71251	0.0292468	0.0809369	3.14516	0.015643	0.0420611
ACTL8	-2.81452	0.0251897	0.0727555	-3.45175	0.0101803	0.0298593
ACTN1	-0.245799	0.812686	0.876473	3.90867	0.00550086	0.018305
ACTN2	-0.597415	0.568506	0.690234	-1.59759	0.152908	0.249794
ACTN3	0.244828	0.81341	0.876785	-0.741114	0.482053	0.594075
ACTN4	-4.65302	0.00215679	0.0115249	0.938886	0.378161	0.495217
ACTR10	1.83552	0.107814	0.209688	10.6384	1.14792e-05	0.000202405
ACTR1A	-2.97389	0.0199902	0.0611891	-8.44533	5.42845e-05	0.000579425
ACTR1B	1.24095	0.253468	0.391287	-1.63071	0.145712	0.240613
ACTR2	4.68023	0.00208745	0.0112504	-5.57708	0.00075376	0.00389057
ACTR3	-0.720342	0.493994	0.625066	-0.656207	0.532062	0.63993
ACTR3B	2.15445	0.067025	0.148318	-5.82528	0.000579473	0.00320872
ACTR3C	0.821369	0.437742	0.57473	-0.702993	0.504114	0.614806
ACTR5	-0.107681	0.917184	0.94604	2.23084	0.059792	0.120639
ACTR6	-2.06721	0.0763602	0.162795	-5.13339	0.00123048	0.00568459
ACTR8	3.4624	0.010032	0.0363288	-0.703369	0.503894	0.614702
ACVR1	5.74519	0.000630254	0.00465559	1.14447	0.288988	0.405739
ACVR1B	-1.0954	0.308569	0.450705	-13.401	2.33415e-06	7.41628e-05
ACVR1C	0.91961	0.3875	0.528142	0.639127	0.542499	0.648993
ACVR2A	2.01342	0.0827456	0.172861	1.81648	0.110896	0.194988
ACVR2B	8.12061	7.03147e-05	0.000972054	-3.64453	0.00782278	0.0242304
ACVRL1	-6.03953	0.00046465	0.0036902	-0.555806	0.595158	0.694351
ACY1	-3.20143	0.0144436	0.047923	-4.61212	0.0022658	0.00916556
ACYP1	-7.66231	0.000102827	0.00126646	0.225847	0.827588	0.880503
ACYP2	-0.0651604	0.949816	0.968271	1.90478	0.0972809	0.175915
ADA	-1.6337	0.145078	0.261127	-6.17625	0.000404739	0.0024485
ADAL	3.57076	0.00864696	0.032525	-1.98207	0.0867066	0.161104
ADAM1	9.20873	3.0492e-05	0.00054937	3.55263	0.00886361	0.0266686
ADAM10	-15.8857	7.09606e-07	4.51046e-05	2.98621	0.0196386	0.0503612
ADAM11	0.874326	0.410109	0.549887	-5.66254	0.000687904	0.00361637
ADAM12	-2.80193	0.0256568	0.0735787	-0.0120418	0.990719	0.993038
ADAM15	1.12405	0.297008	0.438219	-5.14098	0.00121994	0.00565168
ADAM17	-10.4689	1.28079e-05	0.000308351	-2.89635	0.0223625	0.0557881
ADAM19	-0.0780781	0.939888	0.961359	-5.74408	0.000630993	0.00340692
ADAM20	0.896673	0.398834	0.539224	-0.376381	0.717463	0.796246
ADAM21	2.41525	0.0454073	0.112139	2.54982	0.0371801	0.0825271
ADAM21P1	-0.490246	0.638522	0.744465	-0.223186	0.829581	0.881919
ADAM22	-0.792874	0.453141	0.589077	3.34109	0.0118704	0.0337596
ADAM23	-0.55379	0.596467	0.711401	7.54084	0.000114076	0.000978204
ADAM28	1.57687	0.157576	0.277408	0.692639	0.510217	0.620251
ADAM29	1.0591	0.32373	0.465998	1.18798	0.272488	0.388697
ADAM32	1.79966	0.11369	0.217673	0.668257	0.524773	0.632658
ADAM33	-1.83531	0.107847	0.209707	-0.108629	0.916457	0.945371
ADAM8	2.89018	0.0225638	0.066963	-0.0630395	0.951447	0.966416
ADAM9	-1.71278	0.12922	0.239044	9.90834	1.86142e-05	0.00027966
ADAMTS1	-0.888139	0.403113	0.543555	1.44128	0.191478	0.296827
ADAMTS10	1.8854	0.100124	0.198318	3.39898	0.0109516	0.0316417
ADAMTS12	-7.12473	0.000164501	0.00177898	-7.34965	0.000134696	0.00110299
ADAMTS13	10.0715	1.66637e-05	0.000368952	1.63513	0.144776	0.239436
ADAMTS14	1.00084	0.349295	0.492235	-3.01341	0.0188848	0.048904
ADAMTS15	5.99889	0.000484318	0.00381308	2.13577	0.0689235	0.134683
ADAMTS16	-0.574531	0.583078	0.701554	0.493723	0.636182	0.729479
ADAMTS17	-0.879276	0.407592	0.547481	-11.997	5.02887e-06	0.000118419
ADAMTS18	0.200358	0.846734	0.898743	0.00572388	0.995588	0.99663
ADAMTS19	-1.85103	0.105364	0.205993	-0.166948	0.871996	0.912294
ADAMTS2	-11.9105	5.28639e-06	0.000170679	-2.73595	0.0282579	0.0668446
ADAMTS20	-2.72579	0.028682	0.0798483	-2.94002	0.0209923	0.053091
ADAMTS3	-35.4942	2.31369e-09	5.40002e-06	3.38562	0.0111567	0.032132
ADAMTS4	-3.62392	0.00804414	0.0308511	8.97228	3.62928e-05	0.000435777
ADAMTS5	2.8069	0.0254713	0.0732082	5.84529	0.000567508	0.00316634
ADAMTS6	2.02993	0.0807318	0.169807	2.83436	0.0244713	0.0599144
ADAMTS7	2.63367	0.0328456	0.0883152	1.65773	0.140077	0.233912
ADAMTS9	-4.73562	0.00195378	0.0107143	6.66768	0.000250814	0.00173235
ADAMTS9-AS1	-0.946681	0.374433	0.516012	-0.778284	0.461168	0.574808
ADAMTS9-AS2	1.44522	0.190405	0.319315	2.18262	0.0642612	0.127478
ADAMTSL1	-1.74798	0.122699	0.229938	1.39963	0.203137	0.310426
ADAMTSL2	-0.993645	0.352557	0.495507	-2.38213	0.0477035	0.10099
ADAMTSL3	-2.47538	0.0415222	0.105057	-3.12267	0.0161516	0.0431223
ADAMTSL4	-0.661941	0.528585	0.655557	-1.22191	0.260172	0.374925
ADAMTSL5	-0.52406	0.615953	0.726774	0.068571	0.947194	0.963896
ADAP1	1.20244	0.267181	0.406212	-11.2742	7.71433e-06	0.000154108
ADAR	-1.08368	0.313402	0.45564	-0.301297	0.77169	0.838076
ADARB1	1.1647	0.281215	0.421243	6.46337	0.000305023	0.00199533
ADARB2	-2.16587	0.0658908	0.146306	-0.366443	0.72455	0.801874
ADAT1	-4.06708	0.00447595	0.0198556	-2.05408	0.0778726	0.148096
ADAT2	1.95665	0.0900544	0.183326	-10.8605	9.96727e-06	0.000183396
ADAT3	-3.15798	0.0153607	0.0502595	-2.26347	0.0569464	0.115979
ADC	1.82206	0.109984	0.212793	-0.946723	0.374413	0.49137
ADCK1	3.2659	0.0131886	0.044664	-3.32435	0.0121511	0.034415
ADCK2	-1.07054	0.318891	0.460898	-0.475063	0.648793	0.739532
ADCK3	0.950136	0.372789	0.514665	-8.16276	6.79594e-05	0.000677321
ADCK4	3.9158	0.00544963	0.0230072	1.43112	0.194265	0.300148
ADCK5	0.842259	0.426688	0.565361	3.04914	0.0179408	0.0469416
ADCY1	-7.24562	0.000147654	0.00164274	1.67166	0.137251	0.230386
ADCY10	2.17794	0.0647121	0.14422	1.03161	0.335605	0.452733
ADCY2	-4.30748	0.00329689	0.0159145	-0.679842	0.517825	0.626942
ADCY3	-1.84047	0.107025	0.208488	-3.94207	0.00526519	0.0176761
ADCY4	0.98906	0.354649	0.497735	-2.99499	0.0193917	0.0498766
ADCY5	3.5095	0.00940268	0.0346787	10.2164	1.51236e-05	0.000246187
ADCY6	-21.2167	9.15851e-08	1.55601e-05	2.63567	0.0327487	0.0748948
ADCY7	-1.61101	0.149954	0.267492	-1.11553	0.300409	0.41755
ADCY8	-0.984005	0.356966	0.499873	0.177579	0.863939	0.90656
ADCY9	-5.02161	0.00139806	0.00840789	14.1294	1.61354e-06	5.92576e-05
ADCYAP1	-2.00822	0.0833902	0.173688	-5.16889	0.00118202	0.00551962
ADCYAP1R1	-4.66806	0.00211815	0.0113721	-20.7623	1.06824e-07	1.39312e-05
ADD1	7.20018	0.000153749	0.00169086	20.6828	1.09775e-07	1.40536e-05
ADD2	0.760163	0.471272	0.605224	0.772388	0.46444	0.577618
ADD3	-1.9188	0.0952739	0.190915	-0.0729267	0.943846	0.961617
ADH4	0.298717	0.77358	0.847214	-0.776886	0.461943	0.575576
ADH5	3.47615	0.00984369	0.035804	-1.59519	0.153443	0.250421
ADH6	5.75828	0.000621621	0.00460116	4.79855	0.00181325	0.00768907
ADHFE1	3.5112	0.0093807	0.0346128	1.14441	0.28901	0.405739
ADI1	-2.48654	0.040839	0.103872	-5.99749	0.00048501	0.00282506
ADIPOR1	3.95122	0.00520258	0.0222065	-0.669069	0.524284	0.63232
ADIPOR2	-3.02754	0.0185052	0.0577524	2.34029	0.0507752	0.106041
ADK	1.23322	0.256171	0.394062	-4.27804	0.00342108	0.0126432
ADM	-0.515546	0.621595	0.731702	0.758593	0.472154	0.584773
ADM2	-0.225473	0.827868	0.885335	-0.839988	0.42788	0.543534
ADNP	3.26573	0.0131918	0.0446665	5.36222	0.000952535	0.0046712
ADNP2	1.0184	0.341429	0.484379	-1.18616	0.273162	0.389434
ADO	-12.7732	3.25821e-06	0.000120358	-6.28055	0.000364818	0.00227124
ADORA1	-4.2912	0.00336498	0.0161584	-2.37212	0.0484214	0.1022
ADORA2A	1.11106	0.302207	0.443802	6.6707	0.000250099	0.00172873
ADORA2B	0.129087	0.900815	0.934752	-1.47442	0.182631	0.286112
ADORA3	-3.8325	0.00608236	0.0250274	-2.12506	0.0700356	0.136446
ADPGK	-5.65967	0.000690009	0.00498358	-27.7581	1.34676e-08	6.35711e-06
ADPRH	-1.43734	0.192554	0.321999	-1.93711	0.0927132	0.169783
ADPRHL1	-0.478093	0.646737	0.750816	0.200697	0.846478	0.894442
ADPRHL2	-5.84845	0.000565641	0.00428986	-0.59324	0.571149	0.673996
ADRA1A	-2.62432	0.0333017	0.089238	0.241036	0.816237	0.871973
ADRA1B	0.212928	0.837277	0.891934	0.914251	0.390127	0.506869
ADRA1D	0.774182	0.463443	0.598361	-0.525162	0.615224	0.711868
ADRA2A	-0.895976	0.399183	0.539535	5.66602	0.000685367	0.00361272
ADRA2B	0.76078	0.470926	0.605015	-1.27336	0.242394	0.355649
ADRA2C	2.05118	0.0782102	0.165786	-6.12022	0.000428182	0.00256134
ADRB2	0.807801	0.445028	0.581566	1.70933	0.129877	0.220699
ADRBK1	1.31191	0.229766	0.364415	-10.6052	1.17268e-05	0.000205378
ADRBK2	-2.31906	0.0524101	0.124106	-6.53338	0.000285096	0.00190065
ADRM1	-2.3399	0.0508049	0.121396	-0.927451	0.383681	0.500749
ADSL	1.71468	0.12886	0.238621	-9.1056	3.28828e-05	0.00040931
ADSS	5.09274	0.00128871	0.00792804	1.37195	0.211232	0.320025
ADSSL1	-0.190314	0.854309	0.903723	-1.5211	0.170796	0.271812
AEBP1	0.26064	0.801656	0.868182	2.77048	0.026864	0.0642998
AEBP2	4.02686	0.0047148	0.0206481	0.0731816	0.94365	0.961617
AEN	-14.766	1.1854e-06	6.33258e-05	-2.62622	0.0332086	0.0756894
AES	1.76511	0.11964	0.225663	2.99026	0.0195242	0.0501675
AFAP1	0.381327	0.713947	0.802749	7.33764	0.000136124	0.00111068
AFAP1-AS1	-1.25323	0.249221	0.386635	-2.28087	0.0554856	0.113615
AFAP1L1	-3.13232	0.0159314	0.0516436	-3.72633	0.00700679	0.0221524
AFAP1L2	0.152808	0.882738	0.922523	-0.951513	0.372136	0.489406
AFF1	-5.29004	0.00103186	0.00670542	0.183453	0.859494	0.903791
AFF2	-2.12367	0.0701811	0.153086	1.13745	0.291725	0.408589
AFF3	-1.36636	0.212899	0.345453	-0.0248161	0.980874	0.986082
AFF4	2.08951	0.0738576	0.159139	3.71455	0.00711845	0.0224313
AFG3L1P	3.55591	0.00882398	0.0330949	2.99854	0.0192929	0.0497097
AFG3L2	2.16764	0.0657172	0.146012	-12.1815	4.52561e-06	0.000110791
AFMID	3.00642	0.0190754	0.0590853	-3.02086	0.0186838	0.0485078
AFTPH	2.36069	0.0492533	0.118672	6.98917	0.000186009	0.00138812
AGA	0.122549	0.90581	0.938308	5.44799	0.000866938	0.00435361
AGAP1	-0.334081	0.747824	0.828439	1.99247	0.0853727	0.159122
AGAP1-IT1	-1.65894	0.139828	0.25422	0.378041	0.716282	0.795306
AGAP10	-0.479402	0.645849	0.750454	-1.09355	0.309329	0.426459
AGAP11	-0.0125459	0.99033	0.993061	0.760966	0.470822	0.583838
AGAP2	1.14138	0.29019	0.431381	7.09095	0.000169588	0.00130096
AGAP3	0.0188887	0.985442	0.990729	-0.194275	0.85132	0.897695
AGAP4	3.88826	0.0056505	0.0236139	2.36502	0.0489361	0.103041
AGAP5	1.09005	0.310768	0.452976	0.227252	0.826536	0.879768
AGAP6	2.39121	0.0470628	0.11513	0.148869	0.885735	0.922526
AGAP7	-0.564962	0.589234	0.705877	0.858062	0.418459	0.534586
AGAP8	1.60594	0.151063	0.269043	2.90823	0.0219808	0.0549792
AGAP9	0.577389	0.581246	0.699862	0.48983	0.638802	0.73156
AGBL1	0.653047	0.533983	0.660629	1.04763	0.328643	0.446218
AGBL2	1.92662	0.0941716	0.189375	2.54951	0.0371971	0.0825447
AGBL3	-1.31599	0.228463	0.36286	-0.542918	0.603553	0.701489
AGBL4	0.167275	0.871748	0.914395	1.44353	0.190866	0.296206
AGBL5	1.5461	0.164749	0.286552	1.83332	0.108166	0.191019
AGER	6.01337	0.000477203	0.00376686	0.311792	0.76402	0.83222
AGFG1	-1.34457	0.219516	0.352812	-12.2237	4.41855e-06	0.000109302
AGFG2	-7.13409	0.000163122	0.00176617	-0.887609	0.40338	0.520074
AGGF1	-0.966231	0.365205	0.508	-13.6261	2.07841e-06	6.90742e-05
AGK	-12.4008	3.99993e-06	0.000141087	-1.98805	0.0859369	0.159886
AGL	0.00709172	0.994534	0.996233	-2.03995	0.079533	0.15056
AGMAT	1.1598	0.283081	0.423237	0.632164	0.54679	0.652666
AGPAT1	-16.6217	5.15866e-07	3.86462e-05	-8.65258	4.62203e-05	0.000518027
AGPAT2	-0.131972	0.898613	0.933053	-0.391293	0.706885	0.788011
AGPAT3	20.3704	1.22308e-07	1.76464e-05	7.56927	0.000111324	0.000962777
AGPAT4	1.70028	0.131614	0.242387	3.55677	0.00881363	0.0265402
AGPAT4-IT1	-2.11386	0.0712177	0.154642	-2.30055	0.0538786	0.110962
AGPAT5	1.47713	0.181925	0.308727	-4.92325	0.00156656	0.00688384
AGPAT6	-2.65576	0.0317929	0.0860564	-0.41905	0.687379	0.772361
AGPAT9	-1.13901	0.291115	0.432195	-1.01614	0.342431	0.459923
AGPHD1	-0.105832	0.918599	0.947046	1.96728	0.0886397	0.163766
AGPS	1.36539	0.21319	0.345632	2.70004	0.0297873	0.0696199
AGR2	-2.06421	0.0767031	0.16342	-4.17341	0.00390566	0.0140263
AGRN	4.92298	0.00156706	0.00912476	6.57946	0.000272774	0.00184219
AGRP	-0.429474	0.680118	0.776722	0.597547	0.568423	0.671608
AGT	-2.58719	0.0351797	0.093077	2.08911	0.0739015	0.142306
AGTPBP1	-1.34174	0.220387	0.353817	2.94998	0.0206923	0.0525005
AGTR1	-1.02309	0.339354	0.482113	6.72629	0.00023732	0.00166124
AGTRAP	-0.550637	0.598517	0.71302	-9.53977	2.40471e-05	0.000331046
AGXT2L2	0.715861	0.496595	0.627345	-0.903765	0.395304	0.511949
AHCTF1	-1.04631	0.329212	0.471462	-1.50246	0.175436	0.277568
AHCY	3.7037	0.0072229	0.0283625	-5.24267	0.00108789	0.0051677
AHCYL1	4.04477	0.00460677	0.0202948	1.19993	0.268096	0.383697
AHCYL2	2.1116	0.0714588	0.155018	1.13145	0.29408	0.410984
AHDC1	-6.52083	0.000288558	0.00263074	3.28489	0.0128415	0.0359148
AHI1	2.34529	0.0503981	0.120696	-0.221858	0.830576	0.882727
AHNAK	1.28754	0.23768	0.373318	-1.7813	0.116815	0.203247
AHNAK2	6.53746	0.00028398	0.00259552	-1.27109	0.243155	0.356506
AHR	1.29795	0.234271	0.369496	-0.4664	0.65469	0.744693
AHRR	6.93409	0.000195636	0.00201386	-7.18853	0.000155356	0.00122313
AHSA1	-4.51228	0.00255828	0.0131042	-11.5655	6.47355e-06	0.000138941
AHSA2	2.97886	0.0198476	0.0608919	3.22571	0.0139567	0.0384015
AIDA	-2.94415	0.0208674	0.063193	-6.03701	0.00046584	0.00273619
AIF1L	-0.62247	0.552798	0.676886	-4.21518	0.00370375	0.0134576
AIFM1	0.774975	0.463002	0.598012	-13.4142	2.31824e-06	7.41628e-05
AIFM2	1.59795	0.152828	0.271341	1.46376	0.185437	0.289535
AIFM3	0.0952997	0.926671	0.952394	-2.04486	0.0789519	0.149756
AIG1	3.61524	0.00813937	0.0311441	2.97967	0.0198244	0.0507232
AIM1	-0.0207204	0.98403	0.989802	0.0760918	0.941414	0.960696
AIM1L	-1.15845	0.283597	0.423834	1.33094	0.223744	0.334082
AIM2	-3.11154	0.0164099	0.0527058	2.83415	0.0244789	0.0599248
AIMP1	1.75638	0.12119	0.22776	-1.23293	0.256273	0.370864
AIMP2	-1.33109	0.223697	0.357534	-3.94369	0.00525408	0.0176492
AIP	-2.83593	0.0244157	0.0711074	-3.20414	0.0143884	0.0393215
AJAP1	-0.692845	0.510095	0.639889	-1.23967	0.253913	0.368269
AK1	-1.44708	0.189902	0.318707	0.73698	0.484414	0.595923
AK2	-1.78247	0.116613	0.22156	-9.388	2.67887e-05	0.000354951
AK3	3.44896	0.0102197	0.0368252	-10.7448	1.07251e-05	0.000192199
AK4	-0.504844	0.628726	0.737232	-2.69359	0.0300711	0.0701029
AK5	1.2583	0.247486	0.384699	-2.15153	0.0673184	0.132229
AK7	1.0181	0.341563	0.48447	-2.6125	0.033888	0.0769102
AK8	0.89747	0.398436	0.538806	0.343545	0.740987	0.813928
AKAP1	-8.69019	4.49067e-05	0.000717835	-10.2492	1.47976e-05	0.000243224
AKAP10	2.19876	0.0627292	0.140946	3.16347	0.0152416	0.0412257
AKAP11	-0.129437	0.900548	0.934528	1.70572	0.130568	0.2215
AKAP12	1.86673	0.102937	0.202392	-1.21025	0.26435	0.37944
AKAP13	-5.3707	0.000943667	0.00624876	8.30971	6.04176e-05	0.000625858
AKAP14	2.89981	0.0222506	0.0662778	0.0874309	0.932707	0.95525
AKAP2	-0.37288	0.719956	0.807307	0.0596488	0.954055	0.967736
AKAP3	2.35902	0.0493763	0.118881	3.36615	0.0114629	0.0327855
AKAP4	4.07127	0.00445182	0.0198017	10.1614	1.56884e-05	0.000251943
AKAP5	-4.1731	0.0039072	0.0180735	8.49542	5.21996e-05	0.0005625
AKAP6	2.95245	0.0206184	0.0626471	3.15264	0.0154777	0.0417175
AKAP7	6.47879	0.000300504	0.00269771	6.54007	0.000283267	0.0018932
AKAP8	3.36683	0.011452	0.0401671	-0.932852	0.381066	0.497945
AKAP8L	1.31621	0.228393	0.36286	-2.25544	0.0576341	0.117013
AKAP9	1.03817	0.332738	0.475314	-4.19755	0.00378755	0.0137023
AKD1	2.44408	0.0434998	0.108678	3.32263	0.0121805	0.0344744
AKIP1	-1.49184	0.17813	0.303859	-3.42517	0.0105613	0.0307437
AKIRIN1	6.81837	0.000217732	0.00217481	8.521	5.11697e-05	0.000554029
AKIRIN2	1.42495	0.195977	0.325833	-10.4765	1.27448e-05	0.00021808
AKIRIN2-AS1	-4.79681	0.00181699	0.0101948	-6.79633	0.00022225	0.00157578
AKNA	-7.05977	0.00017444	0.00186049	1.00981	0.345258	0.463104
AKNAD1	-3.44415	0.0102877	0.0370118	-0.725754	0.490864	0.602193
AKR1A1	-2.75666	0.027413	0.0771188	-3.1297	0.0159907	0.0427871
AKR1B1	-6.06454	0.000452987	0.0036213	-23.685	4.18295e-08	9.27339e-06
AKR1C1	1.12027	0.298513	0.439852	-8.96285	3.65486e-05	0.000437692
AKR1C2	0.692464	0.510321	0.640022	-7.73847	9.64119e-05	0.000868878
AKR1C3	-0.534358	0.609164	0.721198	-21.2074	9.18717e-08	1.30747e-05
AKR1D1	-1.70721	0.130282	0.240568	1.34252	0.220146	0.330091
AKR1E2	-4.10428	0.00426671	0.0192324	-4.26967	0.00345734	0.0127539
AKR7A2	-1.64594	0.142511	0.257859	-5.44719	0.000867694	0.00435527
AKR7A2P1	0.14604	0.887888	0.925617	0.074459	0.942669	0.961318
AKR7A3	0.966887	0.364898	0.507651	-1.83275	0.108256	0.191149
AKR7L	1.25702	0.247925	0.385184	-1.92844	0.0939167	0.171328
AKT1	-0.917244	0.388658	0.529403	-1.61602	0.148865	0.244651
AKT1S1	0.777848	0.46141	0.596711	-8.51894	5.12517e-05	0.000554587
AKT2	-13.5561	2.1543e-06	9.36913e-05	-3.57748	0.00856816	0.0259515
AKT3	5.29049	0.00103135	0.00670542	2.88205	0.0228314	0.0566624
AKTIP	2.42183	0.0449648	0.111304	14.5586	1.30884e-06	5.22933e-05
ALAD	-6.30281	0.000356881	0.0030617	1.45518	0.187721	0.292323
ALAS1	1.46781	0.184366	0.311979	-0.548276	0.600055	0.698451
ALB	0.302081	0.771116	0.845382	0.752886	0.475372	0.587676
ALCAM	-2.65071	0.0320304	0.0865459	8.53924	5.04492e-05	0.000548464
ALDH16A1	-1.96156	0.0893979	0.182418	-1.64769	0.142147	0.236419
ALDH18A1	-2.34375	0.0505137	0.120886	-8.41158	5.57425e-05	0.000590798
ALDH1A2	0.910287	0.392078	0.532768	0.999007	0.350123	0.467934
ALDH1A3	-6.66639	0.00025112	0.00240143	-4.60965	0.00227258	0.00918887
ALDH1B1	-8.46156	5.3599e-05	0.000804604	-6.31344	0.000353157	0.00222378
ALDH1L1	-0.94084	0.377224	0.518469	-0.671882	0.522593	0.630908
ALDH1L2	1.17089	0.278872	0.418734	-7.3076	0.000139773	0.00113044
ALDH2	0.391343	0.706849	0.797234	0.917947	0.388314	0.505077
ALDH3A1	1.59149	0.15427	0.273154	-2.09187	0.0735977	0.14185
ALDH3A2	-0.262539	0.800248	0.867432	3.85261	0.0059226	0.0194135
ALDH3B1	-2.02649	0.0811472	0.170501	-8.4972	5.21273e-05	0.00056247
ALDH4A1	0.00542104	0.995822	0.997202	-5.42825	0.000885856	0.00441238
ALDH5A1	-16.8096	4.76552e-07	3.75281e-05	-3.79138	0.00642366	0.0206939
ALDH6A1	-1.36543	0.21318	0.345632	0.576447	0.58185	0.683165
ALDH7A1	-5.00105	0.00143156	0.00854938	-7.19356	0.00015466	0.00121977
ALDH8A1	1.7617	0.120243	0.226494	2.75639	0.0274238	0.0653648
ALDH9A1	0.217639	0.83374	0.889157	10.2638	1.46543e-05	0.000241962
ALDOA	-0.0840122	0.935331	0.958315	-2.17074	0.0654131	0.129213
ALDOB	-0.049439	0.961911	0.976631	1.67872	0.135839	0.228463
ALDOC	-3.11826	0.0162534	0.052407	3.09878	0.0167113	0.0442703
ALG1	5.087	0.00129717	0.00796296	-3.02645	0.0185343	0.0482163
ALG10	-2.20277	0.0623541	0.140272	-1.21709	0.261892	0.376742
ALG10B	-2.32372	0.0520466	0.123487	-1.1154	0.300462	0.417592
ALG11	-0.325161	0.75429	0.832814	0.871981	0.411305	0.527449
ALG12	-2.04208	0.0792797	0.167701	-0.144317	0.889201	0.925181
ALG13	-1.63349	0.145123	0.261156	0.151089	0.884045	0.9212
ALG14	-1.64595	0.142508	0.257859	-4.4415	0.0027907	0.0108033
ALG1L	3.3452	0.0118025	0.0410558	2.04975	0.0783776	0.148863
ALG1L2	1.23352	0.256067	0.393995	1.15762	0.283917	0.40032
ALG2	6.17487	0.000405298	0.00333861	-3.32931	0.0120672	0.0342284
ALG3	-14.3266	1.46455e-06	7.27435e-05	-10.4436	1.30207e-05	0.000221521
ALG5	2.31254	0.0529228	0.125011	-14.0642	1.66649e-06	6.02913e-05
ALG6	-7.22599	0.000150253	0.00166248	-2.92263	0.0215269	0.0540819
ALG8	-2.80939	0.0253789	0.0730956	-2.42363	0.0448442	0.0958972
ALG9	0.942908	0.376234	0.517678	-5.95054	0.00050894	0.00292231
ALK	-6.49127	0.000296901	0.00267614	2.33099	0.0514851	0.107137
ALKBH1	-3.74945	0.00679329	0.027235	-1.5859	0.155525	0.253201
ALKBH2	-0.371785	0.720737	0.807752	-5.6411	0.000703802	0.00368185
ALKBH3	-2.13763	0.0687325	0.150941	-2.63423	0.0328185	0.0749884
ALKBH4	2.807	0.0254678	0.0732082	1.42421	0.196183	0.302417
ALKBH5	-20.8742	1.0282e-07	1.59566e-05	-2.50032	0.0400119	0.0876357
ALKBH6	-0.466694	0.654489	0.75605	-0.887687	0.40334	0.52006
ALKBH7	0.82852	0.433935	0.571341	-0.141106	0.891647	0.927196
ALKBH8	-0.663405	0.5277	0.654817	-1.44891	0.189407	0.294395
ALLC	1.31744	0.228001	0.362533	1.64939	0.141793	0.235985
ALMS1	-1.48189	0.180688	0.307217	0.503963	0.629315	0.723659
ALMS1P	1.7277	0.126417	0.235344	2.04401	0.0790518	0.149915
ALOX12	2.5183	0.0389589	0.10026	-0.557712	0.593922	0.69351
ALOX12B	1.29838	0.234132	0.36934	-5.87098	0.000552549	0.0031012
ALOX12P2	-0.897931	0.398206	0.538569	4.12702	0.00414403	0.0146167
ALOX15B	1.35057	0.217676	0.35081	-0.489559	0.638985	0.731677
ALOX5	0.525469	0.615021	0.726216	-1.55801	0.161938	0.26126
ALOX5AP	-4.96287	0.00149613	0.00880771	-1.83234	0.108322	0.19122
ALOXE3	0.383414	0.712465	0.801628	-0.995553	0.35169	0.469445
ALPK1	1.13697	0.291914	0.432909	2.0737	0.0756234	0.144803
ALPK2	-0.292409	0.778208	0.85095	1.98054	0.0869044	0.161409
ALPK3	0.505719	0.628142	0.736871	1.12288	0.297475	0.41455
ALPL	-4.97393	0.00147709	0.0087184	-8.23875	6.39348e-05	0.000647144
ALS2	-7.57578	0.000110705	0.00133721	2.60955	0.0340359	0.077188
ALS2CL	4.31854	0.00325152	0.0157625	0.939283	0.377971	0.495038
ALS2CR11	0.386609	0.7102	0.799956	1.64327	0.143066	0.237364
ALS2CR12	0.674673	0.520918	0.649281	1.83054	0.108611	0.191656
ALS2CR8	4.08171	0.00439231	0.0196138	4.50895	0.00256874	0.0101076
ALX3	1.43265	0.193843	0.323465	1.32082	0.226928	0.337947
ALX4	1.23592	0.255226	0.3933	1.07571	0.316723	0.433954
AMACR	-0.162869	0.875092	0.9171	1.71097	0.129563	0.220227
AMBN	2.72194	0.0288445	0.0801167	1.99333	0.0852627	0.159006
AMBP	0.0126378	0.990259	0.993061	-0.441164	0.672018	0.758796
AMBRA1	1.4929	0.17786	0.303484	2.69415	0.0300465	0.0700635
AMD1	-1.77915	0.117187	0.222259	-3.6967	0.0072912	0.0228489
AMDHD1	2.32248	0.0521433	0.123635	2.89734	0.0223305	0.0557235
AMDHD2	-2.92726	0.0213832	0.0643053	-0.807792	0.445033	0.559801
AMELX	1.34578	0.219143	0.352423	1.56159	0.161101	0.260186
AMFR	-3.57612	0.00858401	0.0323595	-7.99703	7.77653e-05	0.000746407
AMH	-1.27583	0.241566	0.37766	0.0163335	0.987411	0.990735
AMHR2	0.739727	0.482845	0.615845	-4.43775	0.00280365	0.0108418
AMIGO1	-0.578805	0.58034	0.699464	-1.42757	0.195249	0.301438
AMIGO2	0.653731	0.533567	0.660339	4.28244	0.00340222	0.0125907
AMIGO3	1.51896	0.171323	0.295151	1.17683	0.276638	0.392983
AMMECR1	-10.1377	1.59385e-05	0.000358741	8.07582	7.29179e-05	0.000711955
AMMECR1L	-2.14911	0.0675629	0.149002	-2.91831	0.021662	0.0543538
AMN	4.0077	0.00483346	0.021024	-3.28515	0.0128369	0.0359074
AMN1	-3.38359	0.0111882	0.0394473	7.07157	0.000172585	0.00131383
AMOT	-3.52645	0.00918669	0.0340896	2.32223	0.0521623	0.108273
AMOTL1	-4.04632	0.00459755	0.0202664	7.76465	9.43116e-05	0.000858179
AMOTL2	10.265	1.46428e-05	0.000338235	4.22103	0.00367639	0.01337
AMPD2	1.37238	0.211103	0.343106	-1.92593	0.0942686	0.171796
AMPD3	2.22163	0.0606208	0.137513	-7.89659	8.4479e-05	0.000792029
AMPH	-3.35085	0.0117099	0.0408118	-2.27752	0.0557641	0.114095
AMT	-0.425871	0.682624	0.778752	-0.989185	0.354592	0.472197
AMTN	0.375103	0.718373	0.806378	-1.3603	0.214721	0.324042
AMY2B	5.41447	0.000899332	0.00605966	4.75472	0.00190991	0.00800284
AMZ1	3.79182	0.00641996	0.0260743	6.1324	0.000422956	0.00253845
AMZ2	-5.21905	0.00111709	0.00709923	-0.100141	0.92296	0.949385
AMZ2P1	-4.39835	0.00294372	0.0146053	3.37786	0.0112777	0.0323883
ANAPC1	-1.45156	0.188693	0.317351	-14.3578	1.4424e-06	5.54417e-05
ANAPC10	-0.884318	0.40504	0.545346	-4.02122	0.00474938	0.0163105
ANAPC11	-2.99456	0.0194037	0.0598067	-0.298274	0.773905	0.8398
ANAPC13	-0.1311	0.899279	0.933424	-2.32023	0.0523181	0.10856
ANAPC16	6.8489	0.000211642	0.00213505	3.87918	0.00571849	0.0188703
ANAPC2	-2.51363	0.0392295	0.100828	-1.96113	0.0894549	0.164879
ANAPC4	1.08625	0.312334	0.454544	1.29658	0.234718	0.346866
ANAPC5	-9.04823	3.43037e-05	0.000595045	-6.77645	0.000226417	0.00160219
ANAPC7	-1.78608	0.115994	0.220778	-8.5436	5.02786e-05	0.000546986
ANG	-1.89104	0.0992878	0.197112	0.980839	0.358423	0.475916
ANGEL1	0.49243	0.637051	0.743476	-9.57518	2.3454e-05	0.000325722
ANGEL2	4.62181	0.00223943	0.0118347	-11.5575	6.50443e-06	0.000139275
ANGPT1	-2.26326	0.0569647	0.1315	17.4874	3.60537e-07	2.57027e-05
ANGPT2	-4.47024	0.00269364	0.0136248	-7.07519	0.000172021	0.00131191
ANGPTL2	-3.4964	0.00957322	0.0351082	-5.43366	0.000880625	0.00439563
ANGPTL3	-0.715839	0.496608	0.627345	0.513217	0.623143	0.718243
ANGPTL4	3.44286	0.0103061	0.0370559	-0.428954	0.680479	0.766208
ANGPTL6	0.0509383	0.960757	0.97595	-1.163	0.281863	0.398258
ANK1	0.426808	0.681972	0.778305	4.98453	0.00145911	0.00649809
ANK2	0.00184583	0.998577	0.99908	8.94778	3.6962e-05	0.000441694
ANK3	-2.94761	0.0207632	0.0629721	2.44533	0.0434194	0.0934219
ANKAR	1.39494	0.20449	0.335735	0.906264	0.394066	0.510855
ANKDD1A	2.39207	0.0470027	0.11504	-2.69543	0.02999	0.0700035
ANKDD1B	0.985205	0.356415	0.499481	1.17124	0.27874	0.395294
ANKFY1	1.20196	0.267354	0.406311	-3.80318	0.00632362	0.0204514
ANKH	-6.35349	0.000339516	0.00295506	-4.41122	0.00289714	0.0111135
ANKHD1	-0.405436	0.696915	0.789487	2.74344	0.0279492	0.0662782
ANKHD1-EIF4EBP3	-0.483818	0.64286	0.747647	-0.752456	0.475615	0.587897
ANKIB1	-4.48178	0.00265572	0.0135044	11.3077	7.5587e-06	0.000152677
ANKLE1	-2.01561	0.0824748	0.172493	-8.92504	3.75956e-05	0.00044689
ANKLE2	-2.40292	0.046249	0.113678	-3.12455	0.0161086	0.0430517
ANKMY1	3.94623	0.00523665	0.0223258	-1.75209	0.121959	0.209985
ANKMY2	0.884193	0.405102	0.545346	6.15354	0.000414061	0.00249493
ANKRA2	3.77885	0.00653178	0.0263987	2.27654	0.0558457	0.11419
ANKRD1	10.068	1.67032e-05	0.000368952	12.4725	3.84352e-06	0.000101263
ANKRD10	9.11729	3.26014e-05	0.00057708	4.86941	0.00166821	0.00722055
ANKRD10-IT1	1.13435	0.292938	0.43387	0.902353	0.396005	0.512602
ANKRD11	1.98418	0.0864338	0.178165	3.32314	0.0121718	0.0344605
ANKRD12	-0.00604034	0.995344	0.99688	4.16088	0.00396854	0.0141932
ANKRD13A	-2.86418	0.023432	0.0688714	8.1065	7.1123e-05	0.000700706
ANKRD13B	1.19714	0.269116	0.408096	-8.55769	4.97322e-05	0.000542991
ANKRD13C	-7.59825	0.000108595	0.00131962	6.49212	0.000296657	0.00195658
ANKRD13D	2.66881	0.0311878	0.0847859	3.31147	0.012372	0.0349241
ANKRD16	6.2658	0.000370187	0.0031359	-7.08028	0.000171231	0.00130845
ANKRD17	-1.10053	0.306472	0.448723	-0.981395	0.358167	0.475645
ANKRD18A	-1.24074	0.253543	0.391369	0.0438395	0.966221	0.975667
ANKRD19P	-0.602145	0.565521	0.687994	-0.509667	0.625507	0.720693
ANKRD2	1.25352	0.249122	0.386548	2.1855	0.063985	0.12711
ANKRD20A4	-0.920763	0.386937	0.527677	-1.38753	0.206641	0.314583
ANKRD20A5P	-0.505369	0.628375	0.737031	0.703143	0.504026	0.61475
ANKRD20A9P	-0.107635	0.917218	0.94604	1.28759	0.237663	0.350319
ANKRD23	1.33768	0.221644	0.355315	-1.1397	0.290844	0.407779
ANKRD24	0.00524841	0.995955	0.997216	-0.038633	0.970231	0.978737
ANKRD26	1.59257	0.154026	0.272775	0.399676	0.700968	0.783296
ANKRD26P1	-0.804572	0.446774	0.583309	1.11944	0.298846	0.415918
ANKRD27	2.13032	0.0694869	0.152083	-2.775	0.0266868	0.0639941
ANKRD28	-0.274207	0.791614	0.861154	-9.32265	2.80765e-05	0.000367148
ANKRD29	0.842379	0.426625	0.56532	1.41029	0.200095	0.307094
ANKRD30BL	-0.0225978	0.982584	0.989365	0.254289	0.806371	0.86438
ANKRD31	0.411561	0.692618	0.786649	1.41088	0.199929	0.306916
ANKRD32	-7.2901	0.000141949	0.00159882	-3.70793	0.00718197	0.0225923
ANKRD33B	0.666586	0.52578	0.65346	-7.79879	9.1649e-05	0.000842735
ANKRD34A	9.54237	2.4003e-05	0.000466187	1.6547	0.140698	0.234763
ANKRD34C	1.67492	0.136599	0.24966	-1.15265	0.285822	0.402444
ANKRD36	0.891663	0.401342	0.541809	1.73979	0.124189	0.213085
ANKRD36B	0.217972	0.833491	0.889133	5.59092	0.000742635	0.00384467
ANKRD36BP1	-1.34502	0.219377	0.352698	1.43145	0.194176	0.300036
ANKRD36BP2	-0.221523	0.830828	0.8873	-0.92968	0.3826	0.499636
ANKRD37	-1.94764	0.0912702	0.185158	-7.77739	9.33075e-05	0.000853667
ANKRD39	-3.17504	0.0149934	0.0493063	-8.86583	3.93033e-05	0.000462157
ANKRD40	18.001	2.93827e-07	2.98406e-05	21.8687	7.3845e-08	1.18799e-05
ANKRD42	3.12589	0.0160778	0.0520162	2.60033	0.0345029	0.07798
ANKRD43	-0.333536	0.748218	0.828732	1.16582	0.280791	0.397145
ANKRD44	0.285903	0.782991	0.854791	8.84875	3.98121e-05	0.000465131
ANKRD45	4.57042	0.00238325	0.0124034	1.09937	0.306944	0.424195
ANKRD46	-3.84969	0.00594549	0.0245643	3.34607	0.0117881	0.0335678
ANKRD49	-1.28245	0.239362	0.375238	3.93275	0.00532985	0.0178455
ANKRD5	4.43808	0.00280252	0.0140582	-1.97162	0.0880679	0.162983
ANKRD50	-3.46471	0.01	0.036242	1.8251	0.10949	0.192982
ANKRD52	-16.7977	4.78932e-07	3.75281e-05	7.78354	9.28274e-05	0.000850988
ANKRD53	1.07881	0.315426	0.457917	1.88558	0.100096	0.179772
ANKRD54	-0.334758	0.747334	0.828098	3.84533	0.00597991	0.0195449
ANKRD55	0.223427	0.8294	0.886292	0.136164	0.895415	0.929931
ANKRD57	2.61372	0.0338272	0.09034	7.26012	0.000145767	0.00116428
ANKRD58	-1.14675	0.288102	0.429054	-0.669912	0.523777	0.631876
ANKRD6	0.475447	0.648532	0.751765	4.2286	0.00364133	0.0132816
ANKRD62	-0.362897	0.727085	0.812496	-1.99357	0.0852321	0.158982
ANKRD63	2.0612	0.0770478	0.163857	-1.31902	0.227498	0.33863
ANKRD64	3.80991	0.00626734	0.0255916	5.13473	0.00122861	0.00567739
ANKRD7	-1.97488	0.0876402	0.180004	1.66697	0.138196	0.231482
ANKRD9	-7.70251	9.93826e-05	0.0012383	2.37278	0.0483736	0.102135
ANKS1A	-5.61712	0.000722076	0.00514971	3.2501	0.013485	0.0373581
ANKS1B	0.110548	0.914989	0.94466	2.21558	0.0611721	0.122702
ANKS3	1.65148	0.141362	0.25629	-0.23141	0.823425	0.877673
ANKS6	0.662624	0.528173	0.655224	-12.267	4.31181e-06	0.000108566
ANKZF1	8.18998	6.64861e-05	0.000931164	-1.0314	0.335696	0.45275
ANLN	-9.49163	2.48808e-05	0.000478128	-1.01566	0.342649	0.460113
ANO1	-0.0676059	0.947936	0.967283	-0.192059	0.852992	0.899243
ANO10	3.62373	0.00804618	0.0308524	-1.31429	0.229004	0.34038
ANO3	0.32486	0.754508	0.8329	2.02154	0.0817486	0.153858
ANO4	-1.9038	0.0974234	0.194082	-5.11205	0.00126068	0.00579901
ANO5	-6.76892	0.000228018	0.00224425	-4.22461	0.00365977	0.0133222
ANO6	0.0221705	0.982913	0.989365	14.9848	1.06926e-06	4.65524e-05
ANO7	-1.80767	0.112351	0.216	-1.61602	0.148864	0.244651
ANO8	-0.975494	0.360893	0.503853	1.48546	0.179768	0.282845
ANO9	0.181599	0.860897	0.907192	-1.6187	0.148284	0.243951
ANP32A	9.21991	3.0245e-05	0.000547017	3.48765	0.00968914	0.0286405
ANP32A-IT1	2.53442	0.0380384	0.0985465	0.851508	0.421858	0.537795
ANP32AP1	4.33311	0.0031928	0.0155359	1.05991	0.323389	0.440795
ANP32B	-2.11836	0.0707409	0.15392	-3.98351	0.00498796	0.0169425
ANP32C	7.96281	7.9983e-05	0.00106426	-0.384649	0.711589	0.791495
ANP32E	-13.2074	2.58292e-06	0.000101855	-0.106249	0.91828	0.946661
ANPEP	1.58971	0.154669	0.27354	1.47964	0.181274	0.284553
ANTXR1	-4.23054	0.0036324	0.0171204	4.79968	0.00181083	0.0076842
ANTXR2	4.53476	0.00248899	0.0128143	8.91814	3.77901e-05	0.000447256
ANUBL1	-5.60251	0.000733461	0.0052064	-6.55035	0.000280488	0.0018767
ANXA1	-1.51535	0.172217	0.296153	0.776144	0.462354	0.575931
ANXA11	-1.08616	0.312373	0.454544	5.05758	0.00134152	0.00608623
ANXA13	-0.437999	0.674206	0.771619	-0.329636	0.751043	0.821147
ANXA2	-2.26764	0.0565928	0.130984	5.81585	0.000585208	0.00323044
ANXA2P1	1.17388	0.277747	0.417563	2.55779	0.0367441	0.0817818
ANXA2P2	-2.15817	0.0666533	0.147677	6.0793	0.00044626	0.00264684
ANXA2P3	-12.6526	3.47996e-06	0.000126778	0.415809	0.689644	0.774161
ANXA3	0.151417	0.883796	0.92307	1.43455	0.193322	0.298971
ANXA4	4.23083	0.00363104	0.0171184	-8.62466	4.72237e-05	0.000524422
ANXA5	-6.9665	0.000189905	0.00197242	-3.13596	0.0158491	0.0424707
ANXA6	4.24415	0.00357042	0.0169028	-1.95614	0.090123	0.165875
ANXA7	1.98332	0.0865442	0.178296	5.4155	0.000898309	0.00445941
ANXA9	2.50875	0.0395145	0.101303	3.50716	0.0094329	0.0280426
AOAH	-0.677188	0.519411	0.647937	-0.555967	0.595054	0.694318
AOC2	-0.373643	0.719412	0.807047	-0.137187	0.894634	0.92955
AOC3	-0.475527	0.648478	0.751765	-0.642061	0.540698	0.647604
AOX1	-8.97257	3.6285e-05	0.000617049	-19.5725	1.62417e-07	1.75429e-05
AP1AR	1.36828	0.212325	0.344753	-14.6417	1.25772e-06	5.16118e-05
AP1B1	-0.301026	0.771889	0.845871	0.909847	0.392295	0.508922
AP1G1	-0.583148	0.577566	0.69709	-3.96031	0.00514115	0.0173802
AP1G2	4.55033	0.0024422	0.0126379	5.63328	0.000709703	0.00370546
AP1M1	-2.01881	0.0820829	0.171901	0.951242	0.372265	0.489469
AP1M2	-7.54736	0.000113439	0.0013666	-3.91111	0.00548326	0.0182659
AP1S1	3.45445	0.0101425	0.0365979	4.67205	0.00210804	0.00863695
AP1S2	-6.56536	0.00027648	0.00254944	-1.60886	0.150424	0.2466
AP1S3	-6.30589	0.000355797	0.003057	-11.3044	7.57381e-06	0.000152776
AP2A1	-0.475864	0.648249	0.751663	7.44608	0.000123816	0.00103965
AP2A2	0.0955732	0.926461	0.952286	-1.7928	0.114848	0.200463
AP2B1	-14.2214	1.54201e-06	7.60667e-05	-6.36892	0.00033442	0.00213763
AP2M1	2.48132	0.0411574	0.104424	1.49634	0.176985	0.279588
AP2S1	-1.40534	0.201502	0.332194	-0.730464	0.488151	0.599359
AP3B1	-1.69319	0.13299	0.244352	4.53336	0.00249324	0.00987894
AP3B2	4.18558	0.00384558	0.0178521	1.21189	0.263758	0.378771
AP3D1	7.28722	0.000142312	0.00160037	8.36005	5.80545e-05	0.000608986
AP3M1	-7.16518	0.000158635	0.00173307	3.03982	0.018182	0.0474491
AP3M2	0.847795	0.423792	0.563167	-18.6508	2.28615e-07	2.02074e-05
AP3S1	-0.5124	0.623687	0.733282	-8.61085	4.7729e-05	0.000527796
AP3S2	1.10971	0.302751	0.444385	-0.00891871	0.993126	0.994877
AP4B1	1.42762	0.195236	0.325128	-1.93212	0.0934043	0.170739
AP4E1	-1.4783	0.181621	0.308309	-1.09806	0.307481	0.424588
AP4M1	-0.551619	0.597878	0.71243	0.747767	0.47827	0.590617
AP4S1	3.60339	0.00827134	0.0315032	6.28191	0.000364329	0.00226898
APAF1	-8.30058	6.08575e-05	0.000880834	-1.91276	0.0961338	0.174326
APBA1	0.643856	0.539597	0.665762	4.40401	0.00292313	0.0111897
APBA2	-0.0364832	0.971886	0.982669	1.53567	0.167249	0.267667
APBA3	1.07357	0.317619	0.459802	0.605862	0.563181	0.666758
APBB1	1.08621	0.312351	0.454544	4.365	0.00306828	0.0116132
APBB2	3.37088	0.0113876	0.0399949	6.9672	0.000189783	0.00140877
APBB3	1.9046	0.0973065	0.193906	1.71103	0.129553	0.220227
APC	1.24515	0.25201	0.389566	2.34593	0.0503496	0.105292
APC2	8.28743	6.14981e-05	0.000886168	1.49165	0.178178	0.280904
APCDD1	-3.1202	0.0162086	0.0523183	-0.165492	0.8731	0.913081
APCDD1L	0.107579	0.917261	0.94604	4.38791	0.00298211	0.011354
APEH	-0.158962	0.878059	0.919219	-1.28823	0.237456	0.350126
APEX1	1.91315	0.0960785	0.191999	-3.50103	0.00951265	0.0282335
APEX2	-7.05987	0.000174423	0.00186049	-2.60787	0.0341208	0.0773418
APH1A	1.88618	0.100007	0.198129	-12.491	3.80422e-06	0.000101022
APH1B	3.04507	0.0180457	0.0566684	9.64979	2.22576e-05	0.000313416
API5	-1.05051	0.327406	0.469798	5.67806	0.000676649	0.00358102
APIP	-7.45674	0.000122675	0.00144624	-5.72847	0.000641471	0.0034385
APITD1	-0.102307	0.9213	0.948672	2.43352	0.044189	0.0947972
APLF	-2.02153	0.0817496	0.171331	0.601355	0.566019	0.66942
APLN	-1.13224	0.293768	0.434604	-2.86389	0.023442	0.0578617
APLNR	-10.9838	9.22629e-06	0.000244932	-16.4849	5.46802e-07	3.21693e-05
APLP1	1.91933	0.0951993	0.19085	-2.98798	0.0195885	0.0502681
APLP2	-6.11568	0.000430146	0.00349491	11.4961	6.74736e-06	0.000142463
APOA1	-0.898733	0.397806	0.538195	1.18431	0.27385	0.3899
APOA1BP	-4.59702	0.00230758	0.0121101	0.587958	0.574502	0.676987
APOB	0.156889	0.879634	0.920285	2.22996	0.0598714	0.120759
APOBEC2	3.45719	0.0101043	0.0365034	1.21799	0.261569	0.37646
APOBEC3B	-3.63032	0.00797466	0.0306299	-0.0520271	0.959919	0.971421
APOBEC3C	-4.18322	0.00385718	0.0178922	-3.07869	0.0171977	0.0453427
APOBEC3D	-0.924269	0.385227	0.526003	-1.98913	0.0857986	0.159711
APOBEC3F	1.42068	0.197167	0.327064	-6.5494	0.000280743	0.00187772
APOBEC3G	-0.632119	0.546818	0.671708	-3.93198	0.00533525	0.0178523
APOBR	2.78971	0.0261191	0.0744697	0.981726	0.358014	0.475477
APOC1	1.61837	0.148357	0.265521	-3.07709	0.0172372	0.0454203
APOE	3.69894	0.00726925	0.0285151	0.306658	0.767768	0.835114
APOL1	6.48567	0.000298511	0.00268379	7.12532	0.000164415	0.00127404
APOL2	8.50742	5.17135e-05	0.000782113	8.05061	7.4431e-05	0.000722799
APOL3	-0.622405	0.552838	0.676886	-1.11462	0.300775	0.417867
APOL4	-3.99735	0.00489893	0.0212093	-9.05292	3.4185e-05	0.000418767
APOL5	1.40549	0.201461	0.332157	3.61522	0.00813957	0.0250075
APOL6	-4.71019	0.00201394	0.010955	-2.72073	0.028896	0.0680176
APOLD1	-7.52369	0.000115773	0.00138646	9.21483	3.03571e-05	0.000385648
APOM	0.494289	0.635802	0.742483	2.42834	0.044531	0.0953845
APOO	-6.0383	0.000465228	0.00369217	-5.46399	0.000851932	0.00428773
APOOL	-3.42934	0.0105005	0.0375692	1.61852	0.148323	0.243992
APOPT1	2.09882	0.0728372	0.157391	-3.48361	0.00974306	0.0287578
APP	1.20866	0.264923	0.403353	11.4009	7.14415e-06	0.000147416
APPBP2	5.07695	0.00131214	0.00803146	1.88779	0.0997691	0.179318
APPL1	0.830047	0.433126	0.570854	-8.40804	5.58982e-05	0.000590798
APPL2	11.2608	7.77763e-06	0.000219549	16.0442	6.61742e-07	3.60174e-05
APRT	0.654991	0.532801	0.659705	-2.90649	0.0220361	0.0550871
APTX	1.72271	0.127348	0.236665	1.19207	0.270976	0.386874
AQP1	-2.92148	0.0215628	0.0646849	-4.14327	0.00405876	0.0144194
AQP10	-2.24815	0.0582652	0.133704	-3.49115	0.00964255	0.0285306
AQP11	-1.80553	0.112708	0.216359	1.31185	0.229783	0.341249
AQP12B	0.823416	0.43665	0.573628	-0.0852657	0.934369	0.956144
AQP2	2.0733	0.0756681	0.161832	0.0805567	0.937985	0.958355
AQP3	1.64059	0.143628	0.259441	0.151075	0.884056	0.9212
AQP4	1.26003	0.2469	0.383868	1.84967	0.105576	0.1873
AQP5	-0.0527886	0.959333	0.975048	-0.176339	0.864878	0.907144
AQP6	1.07832	0.31563	0.458054	2.9979	0.0193108	0.0497311
AQP9	2.32286	0.0521137	0.123581	1.22369	0.259538	0.374425
AQPEP	1.79648	0.114225	0.218312	0.142881	0.890294	0.926188
AQR	5.42712	0.000886947	0.00599398	5.30964	0.00100962	0.00489305
ARAF	-1.07825	0.315659	0.458054	-8.10561	7.11745e-05	0.000700706
ARAP1	-0.506855	0.627383	0.736484	-0.543466	0.603195	0.701214
ARAP1-AS2	-1.07659	0.316353	0.458713	2.15847	0.0666235	0.131162
ARAP3	2.44313	0.0435613	0.108778	1.93938	0.0923998	0.169397
ARC	8.00044	7.75485e-05	0.00103888	4.29209	0.00336121	0.0124769
ARCN1	0.52718	0.613892	0.725284	-1.12228	0.297712	0.41475
ARF1	-3.06393	0.0175648	0.0555418	-6.15018	0.000415462	0.00250172
ARF3	-7.78398	9.27938e-05	0.00118296	-4.16859	0.00392969	0.0140875
ARF4	-1.29074	0.23663	0.37199	2.58587	0.0352483	0.0792356
ARF5	-0.695846	0.508322	0.638132	-3.03938	0.0181936	0.0474726
ARF6	1.34251	0.220149	0.353573	-16.7741	4.83709e-07	3.03219e-05
ARFGAP1	0.863351	0.41573	0.555336	-2.48557	0.0408982	0.0891007
ARFGAP2	-3.57825	0.00855912	0.0323082	-4.76648	0.00188342	0.00792011
ARFGAP3	-1.31159	0.229869	0.364545	-4.51532	0.0025488	0.0100347
ARFGEF1	1.68211	0.135167	0.247552	-6.64436	0.00025642	0.00175879
ARFGEF2	3.65401	0.00772316	0.0298468	-4.21116	0.00372265	0.0135111
ARFIP1	-2.98723	0.0196097	0.0602679	-0.209638	0.839749	0.889564
ARFIP2	-2.64609	0.0322493	0.0870338	-3.3441	0.0118207	0.033634
ARFRP1	-0.512981	0.6233	0.732978	0.544252	0.602681	0.700744
ARG1	-1.29906	0.23391	0.369156	-0.554171	0.59622	0.695143
ARG2	-0.66437	0.527117	0.654298	-2.46294	0.0422967	0.0914866
ARGFXP2	-0.396252	0.703382	0.794358	1.94425	0.0917322	0.168342
ARGLU1	2.75564	0.0274539	0.0772217	3.12114	0.0161869	0.0431913
ARHGAP1	-7.10661	0.000167208	0.00180182	-0.0851815	0.934434	0.956156
ARHGAP10	-2.71658	0.0290723	0.0806017	1.73088	0.125827	0.215184
ARHGAP11A	-13.4503	2.27517e-06	9.60958e-05	-4.27763	0.00342287	0.0126472
ARHGAP11B	-2.79412	0.0259512	0.0741521	1.54944	0.163957	0.263628
ARHGAP12	0.847591	0.423899	0.563267	-8.67627	4.5388e-05	0.000510113
ARHGAP17	-11.3031	7.57991e-06	0.00021736	-6.79975	0.000221542	0.00157259
ARHGAP18	-1.21709	0.261891	0.400481	0.758129	0.472416	0.585007
ARHGAP19	-8.582	4.88047e-05	0.000760171	-6.41081	0.00032101	0.00207305
ARHGAP21	-5.76301	0.000618539	0.00458394	-3.7035	0.00722488	0.022692
ARHGAP22	-3.5858	0.0084716	0.0320711	-3.8196	0.00618726	0.0200926
ARHGAP23	-0.149188	0.885492	0.923914	-2.36164	0.0491834	0.103448
ARHGAP24	-0.851462	0.421882	0.561336	2.32911	0.0516294	0.107388
ARHGAP25	-2.64929	0.0320975	0.0866885	-0.391199	0.706951	0.788011
ARHGAP26	-3.421	0.0106225	0.0378565	5.4099	0.000903844	0.00447833
ARHGAP27	7.34048	0.000135785	0.00155351	-0.947903	0.373851	0.490881
ARHGAP28	-4.59027	0.00232652	0.0121781	6.14612	0.000417159	0.00250944
ARHGAP29	-2.9806	0.0197979	0.0607745	-2.87313	0.0231291	0.0572372
ARHGAP30	-1.2636	0.245685	0.382618	5.10843	0.00126588	0.00581709
ARHGAP31	2.00086	0.08431	0.175122	-0.126262	0.902972	0.935815
ARHGAP32	-5.02115	0.00139879	0.00840789	1.17728	0.276472	0.392809
ARHGAP33	-8.29956	6.09071e-05	0.000880851	13.2553	2.51869e-06	7.74742e-05
ARHGAP35	-2.00912	0.0832777	0.173553	10.035	1.70795e-05	0.00026447
ARHGAP36	1.61146	0.149856	0.267396	-1.92448	0.0944716	0.17205
ARHGAP39	5.8851	0.000544517	0.00417494	2.88947	0.022587	0.0562093
ARHGAP4	0.509991	0.625291	0.734693	0.805883	0.446065	0.560634
ARHGAP40	-1.05505	0.325459	0.467819	-0.604336	0.564141	0.667677
ARHGAP42	-2.4268	0.0446329	0.110648	-0.650536	0.535513	0.643005
ARHGAP44	-0.828221	0.434094	0.571468	-1.06634	0.320659	0.437799
ARHGAP5	0.0239483	0.981543	0.988787	-3.55544	0.00882957	0.0265794
ARHGAP6	-0.406391	0.696244	0.789003	4.58458	0.00234261	0.00941343
ARHGAP9	2.47242	0.0417049	0.105446	-0.645257	0.538739	0.645731
ARHGDIA	-1.48657	0.179482	0.305651	-2.64847	0.0321367	0.0739416
ARHGDIB	-5.95984	0.000504098	0.0039402	4.06334	0.00449758	0.0156272
ARHGDIG	2.29797	0.0540866	0.126977	-5.9383	0.000515391	0.00294724
ARHGEF1	-0.677024	0.51951	0.64797	1.03183	0.335506	0.452729
ARHGEF10	-1.78883	0.115523	0.220298	-6.70149	0.00024293	0.00169103
ARHGEF10L	-0.0626563	0.951741	0.969609	1.64248	0.143232	0.237509
ARHGEF11	-3.79534	0.00638996	0.0259814	3.52502	0.00920469	0.0274901
ARHGEF12	-2.82462	0.0248215	0.0719664	-3.84853	0.00595465	0.0194939
ARHGEF15	3.47604	0.00984511	0.035804	-1.16603	0.28071	0.397096
ARHGEF16	-3.02433	0.0185909	0.05793	-2.70919	0.0293896	0.0689207
ARHGEF17	6.72852	0.000236823	0.00230862	4.1568	0.00398922	0.014242
ARHGEF18	0.285343	0.783402	0.855087	6.92695	0.000196923	0.0014435
ARHGEF19	1.13019	0.294577	0.435625	-0.0742906	0.942798	0.96136
ARHGEF2	-1.21359	0.263146	0.401724	1.49765	0.176652	0.279179
ARHGEF25	7.46376	0.00012193	0.00143933	-0.0923741	0.928915	0.95303
ARHGEF26	-6.93231	0.000195955	0.002016	-2.36097	0.0492328	0.103528
ARHGEF26-AS1	-0.180839	0.861471	0.90758	1.15464	0.28506	0.401682
ARHGEF3	-2.15931	0.0665401	0.147498	3.53224	0.00911416	0.0272869
ARHGEF33	-0.302091	0.771109	0.845382	-3.05549	0.0177782	0.0465894
ARHGEF37	1.59263	0.154014	0.272775	-1.38583	0.207137	0.315187
ARHGEF38	0.855828	0.419615	0.559374	1.53134	0.168295	0.268842
ARHGEF4	8.7199	4.38986e-05	0.000706223	-3.89507	0.00560009	0.0185402
ARHGEF40	1.40856	0.200585	0.331133	6.6516	0.000254666	0.00174965
ARHGEF6	-0.97217	0.362436	0.50527	2.81193	0.0252851	0.061365
ARHGEF7	4.97485	0.00147553	0.0087184	8.58686	4.86217e-05	0.000534075
ARHGEF9	3.71772	0.00708821	0.0279835	1.35883	0.215165	0.324498
ARID1A	-3.22443	0.0139818	0.0466892	4.88483	0.00163837	0.00712196
ARID1B	0.347427	0.738189	0.820868	5.10245	0.00127453	0.00584501
ARID2	-0.878392	0.40804	0.547841	0.818896	0.439064	0.553634
ARID3A	7.9579	8.03072e-05	0.00106718	7.20442	0.000153168	0.00121221
ARID3B	2.82939	0.0246495	0.0715705	13.6261	2.07842e-06	6.90742e-05
ARID3C	0.4329	0.67774	0.774493	-2.43869	0.04385	0.0941922
ARID4A	4.70914	0.00201648	0.0109655	4.73259	0.00196085	0.0081652
ARID4B	2.02894	0.0808504	0.170015	1.88156	0.100696	0.180598
ARID5A	-1.17575	0.277045	0.416842	1.22424	0.259344	0.374324
ARID5B	0.492365	0.637096	0.743476	8.99252	3.57503e-05	0.000431258
ARIH1	0.324013	0.755123	0.833273	-1.97263	0.087935	0.162836
ARIH2	1.67488	0.136607	0.24966	1.03578	0.333781	0.451305
ARL1	4.79434	0.0018223	0.0102214	4.51096	0.00256242	0.0100849
ARL10	-1.00552	0.347184	0.490134	0.0236085	0.981805	0.986744
ARL13A	-2.774	0.026726	0.0756308	-0.0695935	0.946408	0.963258
ARL13B	3.91424	0.0054608	0.0230429	-4.21244	0.00371663	0.0134994
ARL15	-1.55244	0.163248	0.284697	-3.06615	0.0175089	0.0459698
ARL16	1.14697	0.288017	0.429028	1.94813	0.0912036	0.167508
ARL17A	-1.48872	0.178931	0.30491	1.17744	0.276412	0.392809
ARL2	0.562323	0.590938	0.707033	-2.78008	0.0264891	0.0636545
ARL2BP	0.959793	0.368225	0.510989	-2.74074	0.0280599	0.06648
ARL3	-5.37766	0.000936458	0.00622217	3.8152	0.0062235	0.0201706
ARL4A	0.719709	0.494361	0.6254	-1.63137	0.145572	0.240512
ARL4C	0.26964	0.79499	0.863742	11.4617	6.88759e-06	0.000144417
ARL4D	-1.95929	0.0897012	0.182832	0.988959	0.354695	0.472197
ARL5A	2.5084	0.039535	0.10131	1.20164	0.267471	0.383066
ARL5B	2.03312	0.0803477	0.169232	-4.20278	0.00376244	0.013625
ARL6	2.08016	0.0748965	0.160844	7.37479	0.00013176	0.00108456
ARL6IP1	-22.1881	6.66036e-08	1.42446e-05	-39.0169	1.173e-09	1.54422e-06
ARL6IP4	0.24889	0.810386	0.874718	1.39423	0.204695	0.312361
ARL6IP5	-5.54153	0.000783196	0.00546134	-4.54692	0.00245234	0.00974876
ARL6IP6	6.50367	0.000293368	0.00265859	-17.6023	3.44232e-07	2.51077e-05
ARL8A	-0.106955	0.917739	0.946479	0.61354	0.558367	0.662751
ARL8B	-1.57097	0.158928	0.278903	2.7128	0.0292342	0.0686805
ARL9	-0.849016	0.423156	0.562567	-4.92474	0.00156385	0.00687525
ARMC1	-3.88751	0.00565609	0.0236318	2.34342	0.0505388	0.105627
ARMC10	1.47987	0.181212	0.307845	-9.53341	2.41554e-05	0.000331662
ARMC2	-0.0200002	0.984585	0.990086	0.744862	0.479919	0.592008
ARMC3	-0.426068	0.682486	0.778708	-2.37629	0.0481207	0.101648
ARMC5	-0.334161	0.747765	0.828425	0.844479	0.425525	0.541293
ARMC6	-2.44501	0.0434399	0.108564	-7.19302	0.000154735	0.00121983
ARMC7	1.87368	0.101882	0.200879	3.24993	0.0134883	0.0373615
ARMC8	0.992439	0.353106	0.496068	4.21035	0.00372649	0.0135217
ARMC9	1.1938	0.270342	0.409359	0.330703	0.75027	0.820598
ARMCX1	7.29137	0.000141791	0.00159882	2.42419	0.0448068	0.0958399
ARMCX2	7.33831	0.000136045	0.00155545	-2.53331	0.0381011	0.0841603
ARMCX3	4.3223	0.00323627	0.0157053	4.68487	0.00207588	0.00853404
ARMCX3-AS1	-3.97663	0.00503282	0.0216805	-1.27584	0.241566	0.354719
ARMCX4	1.31888	0.227543	0.362026	-3.83045	0.00609886	0.0198552
ARMCX5	2.43521	0.0440781	0.109616	-4.07189	0.00444824	0.0154706
ARMCX5-GPRASP2	-1.18642	0.273066	0.412434	-0.740182	0.482585	0.594491
ARMCX6	-2.93526	0.0211373	0.0637873	-0.790916	0.454212	0.568477
ARNT	-1.10303	0.305456	0.447596	-11.4192	7.06609e-06	0.000146637
ARNT2	-4.98453	0.00145911	0.0086627	-2.96801	0.0201607	0.051417
ARNTL	13.3426	2.40627e-06	9.81958e-05	27.0794	1.60756e-08	6.7238e-06
ARNTL2	-3.79111	0.00642603	0.0260931	-5.75005	0.000627034	0.00339252
ARPC1A	0.586726	0.575286	0.695223	6.19041	0.000399041	0.00242209
ARPC1B	2.15185	0.0672869	0.148737	2.46325	0.0422774	0.0914736
ARPC2	-1.55446	0.162772	0.284038	-10.0518	1.6886e-05	0.000262817
ARPC3	32.2836	4.5668e-09	6.91832e-06	29.028	9.77873e-09	5.73444e-06
ARPC4	-0.577529	0.581157	0.699862	1.40955	0.200305	0.307338
ARPC5	-5.70935	0.000654567	0.00478305	-3.17119	0.0150756	0.0408678
ARPC5L	-2.26314	0.0569744	0.131505	2.78088	0.0264583	0.0635972
ARPM1	1.13876	0.291211	0.432227	6.72514	0.000237577	0.00166176
ARPP19	0.840645	0.427535	0.566089	7.45612	0.000122741	0.00103349
ARPP21	3.76567	0.0066476	0.0267656	3.82055	0.00617946	0.0200708
ARR3	-0.18687	0.856911	0.905168	1.0406	0.331684	0.449172
ARRB1	-9.72664	2.10966e-05	0.000427553	0.853496	0.420825	0.536779
ARRB2	-2.18227	0.0642952	0.143519	-3.09353	0.0168369	0.0445011
ARRDC1	1.86526	0.103163	0.20279	0.11671	0.910274	0.940915
ARRDC2	2.95968	0.0204045	0.0621745	-5.67023	0.000682302	0.0036015
ARRDC3	-0.343154	0.741269	0.823134	7.38591	0.000130484	0.00107821
ARRDC4	1.29424	0.235481	0.370749	12.4152	3.96804e-06	0.000103018
ARSA	0.646144	0.538196	0.664259	4.7988	0.00181272	0.00768863
ARSB	-19.3454	1.76429e-07	2.25867e-05	3.26269	0.0132483	0.0368258
ARSD	1.55552	0.162521	0.283811	-0.101624	0.921823	0.948914
ARSE	-2.19149	0.0634145	0.141972	-2.67672	0.0308268	0.0714494
ARSG	2.65757	0.0317082	0.0859051	-3.34945	0.0117327	0.0334259
ARSH	3.26879	0.0131353	0.0445579	3.04447	0.0180613	0.0472086
ARSI	-0.664213	0.527212	0.654345	1.90143	0.0977674	0.176601
ARSJ	4.78703	0.00183813	0.0102937	3.90786	0.00550673	0.0183145
ARSK	0.533993	0.609404	0.721435	1.4614	0.186061	0.290286
ART4	-1.94966	0.0909965	0.184727	1.25852	0.247413	0.361118
ART5	-0.841808	0.426924	0.565551	-2.21719	0.0610244	0.122473
ARTN	-0.168236	0.871019	0.91405	0.185555	0.857905	0.902643
ARV1	-0.550271	0.598756	0.713055	-0.904447	0.394966	0.511693
ARVCF	3.36541	0.0114747	0.0402157	-3.12337	0.0161356	0.0430985
AS3MT	-2.88229	0.0228235	0.0675528	-1.76325	0.119969	0.207455
ASAH1	5.58965	0.000743651	0.00526037	3.80106	0.00634149	0.0204894
ASAH2B	2.07342	0.0756551	0.161823	-3.90821	0.00550423	0.0183095
ASAP1	-10.2476	1.48133e-05	0.000340445	4.96701	0.00148897	0.00661303
ASAP2	0.260034	0.802106	0.868462	-6.53014	0.000285985	0.00190276
ASAP3	2.02692	0.0810943	0.170428	6.70012	0.000243242	0.00169162
ASB1	5.95419	0.000507035	0.00394918	6.46653	0.00030409	0.00199137
ASB13	10.9095	9.66499e-06	0.000252806	-5.87438	0.000550604	0.00309315
ASB14	1.95538	0.0902248	0.183529	0.973894	0.361635	0.478957
ASB16	-0.456974	0.661136	0.760931	0.234406	0.821186	0.875974
ASB2	0.360902	0.728513	0.813592	3.39678	0.0109851	0.0317184
ASB3	0.921387	0.386632	0.527355	0.587801	0.574602	0.677017
ASB6	3.81132	0.0062556	0.0255724	-2.56414	0.0363998	0.081191
ASB7	-2.03366	0.0802827	0.169151	-1.03557	0.333874	0.451398
ASB8	0.227736	0.826174	0.884304	8.47014	5.32404e-05	0.000571681
ASB9	1.15276	0.285782	0.426363	-2.25569	0.0576128	0.116995
ASB9P1	1.97608	0.0874838	0.179764	0.661141	0.52907	0.637078
ASCC1	-0.234066	0.82144	0.881547	-9.48515	2.49954e-05	0.000338149
ASCC2	-3.23457	0.0137833	0.0461959	-0.843549	0.426012	0.541799
ASCC3	1.00456	0.347617	0.490631	2.2974	0.0541323	0.111353
ASCL1	0.254679	0.806081	0.871514	-21.9658	7.15518e-08	1.18249e-05
ASCL2	2.22343	0.0604579	0.137229	-3.94951	0.00521419	0.0175567
ASCL3	0.461319	0.658161	0.758701	1.28789	0.237566	0.350232
ASF1A	1.27916	0.240458	0.376435	-0.0450095	0.965321	0.975025
ASF1B	-19.4387	1.70514e-07	2.21412e-05	2.22761	0.0600816	0.121129
ASGR1	3.51252	0.00936377	0.0345738	2.63827	0.0326236	0.0746429
ASH1L	0.9197	0.387456	0.52814	4.06045	0.00451439	0.0156676
ASH2L	-2.95819	0.0204484	0.0622352	-0.277757	0.788993	0.850769
ASIP	1.4957	0.177148	0.302707	-1.9881	0.0859302	0.159886
ASL	-1.82108	0.110144	0.213011	7.46599	0.000121695	0.00102706
ASNA1	-0.381444	0.713864	0.802705	0.621291	0.553531	0.658852
ASNS	-5.71995	0.000647268	0.00475581	-8.63273	4.69313e-05	0.000522853
ASNSD1	1.39011	0.205889	0.337308	2.92249	0.0215313	0.0540855
ASPDH	3.95519	0.00517562	0.0221227	3.00142	0.0192131	0.0495425
ASPH	8.68861	4.49611e-05	0.000717835	8.90446	3.81795e-05	0.000451571
ASPHD1	1.82457	0.109576	0.212139	-3.89703	0.00558565	0.0185086
ASPHD2	0.818611	0.439216	0.575958	-1.9919	0.0854442	0.159198
ASPM	-7.17334	0.000157481	0.00172253	1.1981	0.268765	0.384352
ASPN	-2.34361	0.0505245	0.120886	-1.38817	0.206454	0.314389
ASPRV1	5.45939	0.000856216	0.0058393	1.12101	0.298217	0.415266
ASPSCR1	-0.952572	0.371634	0.513799	-4.94964	0.00151926	0.00672721
ASRGL1	-10.0685	1.66968e-05	0.000368952	-6.52703	0.00028684	0.00190622
ASS1	2.78714	0.0262174	0.0746331	-2.04612	0.0788028	0.149533
ASTE1	-1.60002	0.15237	0.270828	-0.704247	0.503379	0.614197
ASTL	-2.17133	0.0653548	0.145333	0.841347	0.427166	0.542849
ASTN1	0.0826219	0.936399	0.958923	1.65523	0.14059	0.234627
ASTN2	-4.78308	0.00184674	0.010313	-2.68382	0.0305062	0.0709082
ASXL1	-6.61867	0.00026276	0.00246859	3.97999	0.00501085	0.0170105
ASXL2	3.33984	0.0118911	0.041293	0.516778	0.620777	0.716241
ASXL3	-3.44093	0.0103337	0.037133	2.38043	0.0478252	0.101201
ATAD1	2.33948	0.0508368	0.121441	-0.161145	0.876401	0.91556
ATAD2	-17.7853	3.19965e-07	3.07331e-05	-3.36711	0.0114476	0.0327467
ATAD2B	1.53568	0.167245	0.289722	-2.69471	0.0300219	0.0700331
ATAD3A	-0.100312	0.922828	0.949573	-2.89568	0.0223844	0.0558196
ATAD3B	1.24853	0.250839	0.388548	0.185585	0.857882	0.902643
ATAD3C	0.58944	0.57356	0.694019	-0.409452	0.694096	0.777831
ATAD5	-5.25857	0.00106872	0.00686995	-2.73498	0.0282981	0.0669134
ATAT1	-3.59718	0.00834146	0.0316788	3.37303	0.0113536	0.032555
ATCAY	7.0875	0.000170117	0.00182451	14.9851	1.0691e-06	4.65524e-05
ATE1	2.72364	0.0287727	0.0800397	2.48006	0.0412346	0.0896976
ATF1	3.09506	0.0168003	0.0536753	-3.29463	0.0126673	0.0355534
ATF2	-1.85237	0.105153	0.205701	1.88527	0.100143	0.17982
ATF3	-7.34044	0.00013579	0.00155351	1.78957	0.115398	0.201154
ATF4	-0.40164	0.699585	0.791605	-4.58696	0.00233589	0.00939471
ATF5	0.76154	0.470499	0.604595	-10.6278	1.15572e-05	0.000203189
ATF6	1.42586	0.195724	0.325584	0.187719	0.85627	0.901496
ATF6B	-1.90007	0.0979655	0.194988	7.42276	0.000126354	0.00105366
ATF7	0.491331	0.637792	0.743804	5.27985	0.00104364	0.0050107
ATF7IP	0.889104	0.402627	0.54302	0.461829	0.657812	0.747071
ATF7IP2	-0.515225	0.621808	0.73183	-2.93464	0.0211563	0.0533647
ATG10	-0.69406	0.509377	0.639222	-0.926999	0.3839	0.500905
ATG12	4.49357	0.00261759	0.0133704	1.50443	0.174942	0.277028
ATG13	-17.3847	3.75852e-07	3.23821e-05	-2.09087	0.0737081	0.142007
ATG14	10.3126	1.41896e-05	0.000330709	0.963823	0.366332	0.483381
ATG16L1	-10.751	1.06826e-05	0.000272751	-3.67781	0.00747907	0.0233451
ATG16L2	1.80217	0.113269	0.217229	-4.0159	0.00478227	0.0163939
ATG2A	-1.43094	0.194315	0.323906	3.60031	0.00830603	0.0253816
ATG2B	1.38342	0.207844	0.339515	2.19107	0.0634545	0.126249
ATG3	-1.30183	0.233012	0.368214	0.562392	0.590893	0.690794
ATG4A	-0.766506	0.467719	0.602096	10.5848	1.1882e-05	0.000207097
ATG4B	-0.651601	0.534864	0.661404	-8.81077	4.09702e-05	0.000475768
ATG4C	-4.24137	0.00358297	0.0169411	-4.89232	0.00162409	0.00707677
ATG4D	-1.28404	0.238837	0.374831	-15.4561	8.60397e-07	4.1161e-05
ATG5	-3.49031	0.0096538	0.0353396	3.38367	0.0111869	0.0321935
ATG7	-3.42668	0.0105393	0.0376698	2.22709	0.0601283	0.12121
ATG9A	2.30121	0.0538249	0.126583	3.45948	0.0100724	0.0295954
ATG9B	7.92869	8.22651e-05	0.00108369	0.694013	0.509405	0.619471
ATHL1	0.597757	0.56829	0.69011	-0.299595	0.772936	0.838979
ATIC	-2.2571	0.0574913	0.132397	-23.9421	3.87304e-08	9.02666e-06
ATL1	-5.31533	0.00100326	0.00657237	-3.27373	0.0130443	0.0363701
ATL2	2.25652	0.0575415	0.132495	3.26618	0.0131834	0.0366678
ATL3	1.35341	0.216808	0.349721	3.03353	0.0183469	0.0478451
ATM	1.71076	0.129604	0.239548	-0.500972	0.631317	0.725502
ATMIN	1.20533	0.266129	0.404986	4.37715	0.00302225	0.0114628
ATN1	-11.216	7.99335e-06	0.000223152	2.59641	0.0347036	0.0782822
ATOH7	-7.46625	0.000121666	0.00143739	-7.00118	0.000183981	0.00137638
ATOH8	-2.7149	0.0291441	0.0807637	-1.16309	0.281827	0.398258
ATOX1	-2.01194	0.082928	0.173043	2.0319	0.0804936	0.151983
ATP10D	5.8256	0.00057928	0.00436213	10.8155	1.02548e-05	0.000186984
ATP11A	2.85613	0.023708	0.0694917	-6.57821	0.000273101	0.00184219
ATP11B	-0.138884	0.893341	0.929277	2.56317	0.0364525	0.0812495
ATP11C	0.0451092	0.965244	0.978867	0.97123	0.362873	0.480177
ATP13A1	3.75291	0.0067619	0.0271445	-0.698484	0.506766	0.617023
ATP13A2	2.48683	0.0408215	0.103847	-5.82943	0.000576971	0.00319974
ATP13A3	10.183	1.54632e-05	0.000351003	8.0153	7.66101e-05	0.000738439
ATP13A4	-0.408448	0.6948	0.788094	0.872973	0.410799	0.52706
ATP1A1	1.40448	0.201747	0.332511	-12.7071	3.37771e-06	9.38889e-05
ATP1A1OS	-1.58321	0.156133	0.27562	-0.219046	0.832684	0.883986
ATP1A3	6.14527	0.000417517	0.00341125	3.68955	0.00736171	0.0230262
ATP1B1	2.24925	0.0581698	0.133553	2.56821	0.0361816	0.080814
ATP1B2	4.26525	0.00347665	0.0165797	4.51547	0.00254831	0.0100347
ATP1B3	-3.77975	0.00652397	0.0263847	3.58522	0.0084783	0.025791
ATP2A1	-0.280333	0.787094	0.858137	-0.550178	0.598816	0.697276
ATP2A2	-5.43724	0.00087718	0.00594565	2.67831	0.0307547	0.0713216
ATP2A3	-0.737668	0.484021	0.616696	0.0811692	0.937514	0.958068
ATP2B1	2.63744	0.0326635	0.0879688	9.87913	1.89901e-05	0.000282544
ATP2B2	6.03814	0.000465304	0.00369217	6.01141	0.000478163	0.00279592
ATP2B3	6.13952	0.000419936	0.0034264	4.28232	0.00340271	0.0125907
ATP2B4	-0.707648	0.501386	0.631562	-6.04664	0.000461299	0.00271302
ATP2C1	-3.52343	0.00922478	0.0341891	-2.0315	0.0805424	0.152059
ATP2C2	1.71869	0.128102	0.237703	0.728776	0.489123	0.600227
ATP4A	-0.179034	0.862837	0.908199	-0.991979	0.353316	0.470882
ATP5A1	5.79458	0.000598381	0.00447101	-4.7093	0.0020161	0.00834296
ATP5B	5.52784	0.000794874	0.00551904	-0.124523	0.904301	0.936552
ATP5C1	0.274525	0.791379	0.86095	-1.13591	0.292326	0.409116
ATP5D	-1.08598	0.312448	0.454574	-1.03528	0.334	0.451535
ATP5E	2.13169	0.069345	0.151849	-0.0903454	0.930471	0.953915
ATP5EP2	-1.33122	0.223655	0.35753	-0.500265	0.631791	0.725725
ATP5F1	-5.02147	0.00139829	0.00840789	-2.74006	0.028088	0.0665119
ATP5G1	-7.44358	0.000124084	0.00145907	-5.92239	0.000523917	0.00298567
ATP5G2	1.35889	0.215149	0.347818	-0.0159591	0.9877	0.990844
ATP5G3	-2.87521	0.0230594	0.0680514	-3.17238	0.01505	0.0408187
ATP5H	0.0978951	0.924681	0.950833	-0.291994	0.778512	0.842566
ATP5I	-1.07599	0.316605	0.458926	-2.83197	0.0245568	0.0600671
ATP5J	-0.876088	0.409212	0.548887	1.97618	0.0874715	0.162243
ATP5J2	-1.72444	0.127025	0.236186	-4.16279	0.00395886	0.014164
ATP5L	-0.99324	0.352742	0.495671	-0.228037	0.825948	0.879351
ATP5L2	-0.620727	0.553882	0.677684	-0.200906	0.846321	0.894337
ATP5O	-1.85084	0.105393	0.205993	-2.4485	0.043215	0.0930811
ATP5S	-2.68127	0.0306213	0.0836782	-0.664924	0.526783	0.634702
ATP5SL	-2.87491	0.0230694	0.0680589	-3.79363	0.0064045	0.0206505
ATP6AP1	3.58927	0.00843165	0.0319531	5.81342	0.000586698	0.00323296
ATP6AP1L	-0.901378	0.39649	0.537022	0.205982	0.842499	0.891641
ATP6AP2	1.26804	0.244183	0.380736	7.98758	7.83712e-05	0.000750127
ATP6V0A1	7.6603	0.000103003	0.00126776	5.98665	0.000490423	0.00284564
ATP6V0A2	4.15379	0.0040046	0.0183884	2.94167	0.020942	0.0529788
ATP6V0A4	-1.67539	0.136504	0.249572	-0.437652	0.674447	0.760971
ATP6V0B	-0.212591	0.83753	0.8921	0.707875	0.501253	0.612344
ATP6V0C	0.840631	0.427542	0.566089	1.53514	0.167377	0.267824
ATP6V0D1	0.550395	0.598675	0.71302	5.252	0.0010766	0.00513534
ATP6V0E1	1.74385	0.123449	0.231072	2.8642	0.0234314	0.0578436
ATP6V0E2	-2.40042	0.0464215	0.114071	-1.28774	0.237616	0.350277
ATP6V1A	-1.34931	0.218062	0.351182	4.3683	0.00305569	0.0115752
ATP6V1B1	3.17877	0.0149145	0.0491445	1.09108	0.310344	0.427469
ATP6V1B2	-1.12017	0.298552	0.439852	1.8757	0.101576	0.18198
ATP6V1C1	-9.33156	2.78969e-05	0.000518017	-3.72846	0.00698686	0.0221086
ATP6V1C2	-1.5352	0.167361	0.289785	2.91051	0.0219082	0.0548579
ATP6V1D	3.88115	0.00570368	0.0237869	-4.58262	0.0023482	0.0094338
ATP6V1E1	-7.42358	0.000126263	0.0014761	2.58884	0.0350941	0.0789671
ATP6V1E2	-0.562503	0.590821	0.707033	-2.91053	0.0219075	0.0548579
ATP6V1F	-2.21282	0.0614247	0.138851	-1.27239	0.24272	0.355954
ATP6V1G1	2.19773	0.062826	0.141099	4.96689	0.00148918	0.00661303
ATP6V1G2	2.57977	0.0355676	0.0937283	2.71216	0.0292618	0.0687275
ATP6V1G3	2.48595	0.0408748	0.103925	3.49974	0.00952946	0.028265
ATP6V1H	2.86675	0.0233448	0.0686485	6.93624	0.00019525	0.00143444
ATP7A	-2.30671	0.0533854	0.12576	-0.875826	0.409345	0.525677
ATP7B	-5.33133	0.000985617	0.00647778	8.71236	4.41522e-05	0.00050387
ATP8A1	3.73973	0.00688221	0.0274428	0.261241	0.80121	0.860522
ATP8A2	6.11543	0.000430255	0.00349491	6.91544	0.00019902	0.00145301
ATP8B1	2.40378	0.0461896	0.113569	1.96344	0.0891477	0.164437
ATP8B2	-0.952759	0.371545	0.513754	0.827898	0.434266	0.549145
ATP8B3	-2.02521	0.0813016	0.170648	-1.68571	0.134456	0.226683
ATP8B4	1.76906	0.118945	0.224726	-0.345706	0.739429	0.812898
ATP8B5P	0.518951	0.619335	0.729584	2.91466	0.0217768	0.0545856
ATP9A	-4.78126	0.00185073	0.0103299	0.0398499	0.969294	0.978172
ATP9B	-1.80635	0.11257	0.216254	-1.50262	0.175397	0.277568
ATPAF1	11.4856	6.78983e-06	0.000201358	2.85615	0.0237075	0.0583744
ATPAF2	-13.2821	2.48361e-06	9.9668e-05	-3.22668	0.0139375	0.0383662
ATPBD4	1.26721	0.244465	0.381045	0.940185	0.377538	0.494614
ATPIF1	3.6098	0.00819973	0.0312763	-1.27269	0.242618	0.355833
ATR	1.1615	0.282434	0.422585	-0.10384	0.920125	0.947757
ATRIP	-4.0663	0.00448041	0.0198657	-2.26006	0.0572374	0.116376
ATRN	3.35926	0.0115735	0.0404719	-6.47288	0.000302226	0.00198345
ATRNL1	-2.78985	0.0261136	0.0744657	3.12206	0.0161656	0.0431471
ATRX	2.11209	0.0714067	0.154942	-2.39521	0.046783	0.0993885
ATXN1	3.72499	0.00701944	0.0278252	10.1455	1.58554e-05	0.000253339
ATXN10	2.88884	0.0226077	0.0670558	-10.5328	1.22872e-05	0.000212329
ATXN1L	5.6963	0.000663678	0.004826	9.79119	2.01743e-05	0.00029293
ATXN2	4.03546	0.00466262	0.020477	-1.27412	0.242141	0.355363
ATXN2L	-0.408804	0.694551	0.788069	-16.4654	5.51384e-07	3.22428e-05
ATXN3	-2.49188	0.0405168	0.103231	0.649805	0.535959	0.643346
ATXN7	1.29947	0.233776	0.369004	3.56414	0.00872536	0.0263311
ATXN7L1	1.46382	0.185421	0.313385	-4.38372	0.00299768	0.0113924
ATXN7L2	3.13905	0.0157796	0.0512885	-2.0566	0.0775797	0.147572
ATXN7L3	0.419672	0.686945	0.782258	2.81008	0.0253535	0.0614864
ATXN7L3B	10.1102	1.62355e-05	0.000362586	10.596	1.17959e-05	0.000205795
AUH	14.189	1.56674e-06	7.63586e-05	7.77638	9.33869e-05	0.000853767
AUP1	-0.672979	0.521934	0.650102	-2.58988	0.03504	0.0788649
AURKA	-18.4396	2.47814e-07	2.7489e-05	3.14429	0.0156623	0.0420881
AURKAIP1	-2.24588	0.0584633	0.133972	-4.75753	0.00190353	0.00798623
AURKAPS1	-3.39024	0.0110854	0.0391531	5.16982	0.00118077	0.00551665
AURKB	-13.2566	2.51692e-06	9.99361e-05	-4.98404	0.00145993	0.00650013
AURKC	-2.18135	0.0643831	0.143628	-0.543252	0.603335	0.701325
AUTS2	-3.25621	0.0133696	0.0451267	2.22803	0.0600443	0.121068
AVEN	6.84335	0.000212735	0.00214211	-1.5641	0.160517	0.259496
AVIL	0.694469	0.509135	0.638976	1.593	0.153931	0.250948
AVL9	-9.62192	2.26962e-05	0.000450959	5.75967	0.000620719	0.00337038
AVPI1	-4.19592	0.00379537	0.0176731	-6.91634	0.000198855	0.00145301
AVPR2	-0.731585	0.487508	0.619701	-1.6801	0.135565	0.22821
AXIN1	2.11478	0.0711206	0.154487	1.07192	0.318311	0.435423
AXIN2	0.374518	0.718789	0.806598	-0.640153	0.541869	0.648452
AXL	2.11342	0.0712649	0.154717	8.13717	6.93787e-05	0.000688071
AZFP	1.45332	0.18822	0.31682	0.712854	0.498346	0.609529
AZGP1	-1.96572	0.0888449	0.181637	-3.20071	0.0144583	0.0394829
AZI1	-0.947016	0.374274	0.515958	-0.257008	0.804351	0.863006
AZI2	7.4921	0.000118974	0.00141176	10.2563	1.4728e-05	0.000242828
AZIN1	0.883082	0.405664	0.545747	-3.49501	0.00959159	0.0284075
AZU1	0.157935	0.87884	0.919718	0.790005	0.454712	0.568906
B2M	-0.270939	0.794029	0.863116	3.70747	0.00718643	0.0225985
B3GALNT1	-1.61799	0.148439	0.265571	-16.6685	5.05735e-07	3.1378e-05
B3GALNT2	-2.32703	0.0517904	0.123072	-9.53711	2.40923e-05	0.000331046
B3GALT1	-1.66334	0.138933	0.252946	1.69429	0.132776	0.224387
B3GALT2	-4.37292	0.00303817	0.0149765	-1.7904	0.115256	0.201059
B3GALT4	-2.41541	0.0453962	0.112127	6.56797	0.00027579	0.00185551
B3GALT5	0.213084	0.83716	0.891914	-1.4258	0.195739	0.301862
B3GALT6	-0.617128	0.556125	0.679494	-1.14566	0.288525	0.405277
B3GALTL	0.582448	0.578013	0.69749	8.88526	3.87335e-05	0.000457231
B3GAT1	2.59332	0.0348624	0.0924124	6.16841	0.000407931	0.00246289
B3GAT3	1.95186	0.0906993	0.184308	-1.16883	0.279652	0.396156
B3GNT1	11.4997	6.7328e-06	0.00020032	5.77425	0.000611278	0.00333306
B3GNT2	-2.81093	0.025322	0.0729985	5.7246	0.000644092	0.0034499
B3GNT3	-1.52426	0.170022	0.293415	-0.988144	0.355068	0.472466
B3GNT4	2.73386	0.0283443	0.0791508	2.13773	0.0687219	0.134391
B3GNT5	1.15301	0.285683	0.426251	3.77787	0.00654029	0.020973
B3GNT7	-0.308875	0.766148	0.841611	0.650575	0.53549	0.643005
B3GNT8	-0.242106	0.815439	0.878191	1.80583	0.112658	0.197437
B3GNT9	0.884908	0.404742	0.545103	4.12771	0.00414041	0.0146149
B3GNTL1	1.57538	0.157917	0.277745	-2.845	0.0240952	0.0591288
B4GALNT1	-14.8568	1.13553e-06	6.14372e-05	11.0039	9.11122e-06	0.000171463
B4GALNT3	0.245477	0.812926	0.876628	-7.87872	8.57408e-05	0.000800967
B4GALNT4	3.26659	0.0131758	0.0446373	-1.66351	0.138899	0.232337
B4GALT1	0.623347	0.552253	0.676419	10.8414	1.00885e-05	0.000185065
B4GALT2	-5.34696	0.000968719	0.00639214	-3.03318	0.0183561	0.0478555
B4GALT3	-2.73556	0.028274	0.0790273	-17.2229	4.01493e-07	2.70863e-05
B4GALT4	0.181996	0.860596	0.907067	5.51394	0.000806926	0.00410325
B4GALT5	-0.25424	0.806407	0.871718	17.946	3.0025e-07	2.39083e-05
B4GALT6	2.24822	0.0582595	0.133704	2.12661	0.0698737	0.136233
B4GALT7	-0.453645	0.66342	0.762732	-4.4091	0.00290476	0.0111334
B7H6	4.21145	0.00372128	0.0174219	-7.72632	9.74046e-05	0.000872705
B9D1	0.810232	0.443716	0.580394	-0.0471961	0.963637	0.973972
B9D2	2.15103	0.0673691	0.14886	1.26634	0.244757	0.358276
BAALC	-27.4938	1.44213e-08	9.35501e-06	8.70563	4.43798e-05	0.000504553
BAAT	1.78754	0.115745	0.220488	3.22371	0.0139961	0.0384924
BABAM1	-1.23814	0.254448	0.392399	2.2611	0.0571486	0.116248
BACE1	4.56653	0.00239452	0.0124514	-0.0605403	0.953369	0.96758
BACE1-AS	3.48597	0.00971149	0.0354562	-1.01259	0.344018	0.461781
BACE2	0.333527	0.748225	0.828732	-1.3784	0.20932	0.317737
BACH1	0.0276043	0.978726	0.987033	2.57668	0.0357306	0.080023
BACH2	-13.5008	2.21657e-06	9.53875e-05	9.0613	3.3974e-05	0.000417024
BAD	-1.27261	0.242645	0.378859	2.85463	0.0237598	0.0584796
BAG1	5.81617	0.000585013	0.00439362	-3.07	0.0174127	0.0457898
BAG2	0.270009	0.794717	0.863571	2.1109	0.0715337	0.138829
BAG3	-3.20411	0.014389	0.0477943	0.209437	0.839901	0.889569
BAG4	2.62604	0.0332173	0.0890886	-5.88855	0.000542569	0.0030588
BAG5	-4.25146	0.00353761	0.0168	1.33913	0.221193	0.331143
BAG6	-1.95044	0.0908908	0.184654	-1.86187	0.103683	0.184789
BAGE2	-0.781366	0.459464	0.594915	-1.27279	0.242586	0.355815
BAHCC1	0.38021	0.71474	0.803489	6.12767	0.000424979	0.00254637
BAHD1	8.54441	5.02469e-05	0.000768242	6.59723	0.000268182	0.00182186
BAI1	4.24778	0.00355411	0.0168488	-0.818336	0.439363	0.553935
BAI2	1.04833	0.328343	0.470774	4.44322	0.00278479	0.0107919
BAI3	-2.11762	0.0708191	0.154035	4.00342	0.00486041	0.0165867
BAIAP2	1.39045	0.205791	0.337185	-0.0150984	0.988363	0.991308
BAIAP2L1	-1.07648	0.316398	0.458713	-2.04593	0.0788261	0.149549
BAIAP2L2	4.03613	0.00465854	0.0204662	2.19725	0.0628711	0.125404
BAIAP3	-0.457043	0.661089	0.760931	0.465175	0.655526	0.74536
BAK1	-1.70371	0.130954	0.241539	1.84789	0.105856	0.187705
BAMBI	-3.64903	0.00777525	0.0300226	-5.17196	0.00117791	0.0055052
BANF1	-3.2751	0.0130194	0.0442225	-1.92411	0.0945244	0.172094
BANK1	-0.524337	0.615769	0.726604	1.13215	0.293805	0.410695
BANP	1.10604	0.304235	0.446131	-0.334378	0.747609	0.818604
BAP1	-3.46523	0.00999283	0.0362305	0.207777	0.841149	0.890631
BARD1	-9.47809	2.51211e-05	0.000479576	-0.994927	0.351974	0.469583
BARHL1	-2.43313	0.0442144	0.10979	-3.92945	0.00535293	0.0178979
BASP1	-21.9485	7.19561e-08	1.44936e-05	8.01204	7.6815e-05	0.000739629
BATF2	1.1007	0.306404	0.448696	0.335982	0.746448	0.817746
BATF3	-1.61815	0.148404	0.265534	-1.87084	0.102312	0.182973
BAX	-1.76794	0.119142	0.224979	-5.96702	0.000500393	0.00289058
BAZ1A	1.97996	0.0869793	0.178868	-0.00018635	0.999856	0.999944
BAZ1B	-0.345312	0.739713	0.821909	-5.10305	0.00127366	0.00584501
BAZ2A	4.73217	0.00196184	0.010739	9.61353	2.28302e-05	0.0003195
BAZ2B	2.7763	0.0266362	0.0754652	3.13481	0.015875	0.0425212
BBC3	8.31536	6.01471e-05	0.000872636	1.14606	0.288371	0.405123
BBIP1	-2.24244	0.0587646	0.13446	4.85529	0.00169607	0.00731502
BBS1	8.97363	3.62565e-05	0.000617049	5.64053	0.000704233	0.00368304
BBS10	2.07805	0.0751332	0.161153	4.09988	0.00429089	0.0150413
BBS12	3.77799	0.00653925	0.026423	5.37246	0.000941838	0.00462702
BBS2	6.65992	0.000252666	0.0024124	0.295856	0.775678	0.840749
BBS4	1.99521	0.085024	0.17613	1.65515	0.140605	0.23463
BBS5	2.34519	0.0504056	0.120696	-2.31558	0.0526829	0.109117
BBS7	1.35015	0.217803	0.350919	3.00687	0.0190631	0.049249
BBS9	-2.39541	0.0467688	0.114676	6.37012	0.000334027	0.00213587
BBX	1.25589	0.24831	0.385616	-0.405964	0.696545	0.779902
BCAM	0.737929	0.483872	0.616662	-1.74986	0.122361	0.210395
BCAN	0.883458	0.405474	0.545685	-1.83588	0.107755	0.190424
BCAP29	-3.43203	0.0104615	0.0374738	3.81938	0.00618903	0.0200947
BCAP31	1.39701	0.203892	0.33504	-4.16988	0.00392323	0.0140727
BCAR1	-0.949544	0.373071	0.514936	-0.45437	0.662923	0.75128
BCAR3	-4.71761	0.0019962	0.010891	5.93869	0.000515187	0.00294724
BCAS1	-0.752313	0.475695	0.609205	-0.42993	0.679801	0.765587
BCAS2	-9.40427	2.64784e-05	0.000499845	-3.58213	0.008514	0.0258434
BCAS3	-0.877084	0.408705	0.548439	0.884643	0.404876	0.521263
BCAS4	0.73298	0.486706	0.618816	-1.11757	0.299592	0.416669
BCAT1	3.23413	0.0137918	0.0462159	-3.35579	0.0116295	0.0331889
BCAT2	1.86094	0.103826	0.203785	0.888019	0.403174	0.519919
BCCIP	1.53352	0.167769	0.290325	-3.94704	0.00523109	0.0175941
BCDIN3D	6.11006	0.00043259	0.00350917	1.25202	0.249638	0.36349
BCHE	-1.84545	0.106239	0.207289	-2.06969	0.0760772	0.145573
BCKDHA	-0.266162	0.797564	0.865655	-3.97422	0.0050487	0.0171063
BCKDHB	2.69883	0.0298407	0.0820934	-3.25765	0.0133426	0.037037
BCKDK	-2.14893	0.0675809	0.149024	-1.53589	0.167196	0.267604
BCL10	-0.966303	0.365171	0.507992	-0.163904	0.874306	0.913982
BCL11A	-3.5039	0.00947524	0.0348614	-2.7756	0.0266636	0.0639556
BCL11B	-6.36209	0.000336665	0.00294525	-5.74133	0.000632824	0.00341166
BCL2	1.95217	0.0906571	0.184264	13.0579	2.79578e-06	8.3593e-05
BCL2L1	1.59516	0.153449	0.272044	1.6169	0.148673	0.24448
BCL2L10	0.474446	0.649212	0.752296	-0.797827	0.450438	0.56488
BCL2L11	-7.8587	8.71797e-05	0.00113122	-3.99227	0.00493137	0.0167879
BCL2L12	-4.55508	0.0024281	0.0125936	-1.97555	0.0875536	0.162329
BCL2L13	11.3205	7.50028e-06	0.000216261	-5.43995	0.000874588	0.0043751
BCL2L15	2.20529	0.0621196	0.1399	2.999	0.0192802	0.0496983
BCL2L2	2.99264	0.0194574	0.0599012	-1.07919	0.315268	0.432483
BCL3	-0.266292	0.797467	0.865655	2.36798	0.048721	0.102654
BCL6	0.622389	0.552848	0.676886	0.28691	0.782249	0.845151
BCL6B	-2.89295	0.0224732	0.0667769	-1.5117	0.173123	0.274948
BCL7A	-1.21345	0.263199	0.401737	2.05889	0.0773142	0.147234
BCL7B	-2.72175	0.0288528	0.0801275	0.578096	0.580794	0.682234
BCL7C	-2.15615	0.0668552	0.148052	0.791211	0.454051	0.568353
BCL9	5.48936	0.000828735	0.00568512	14.4461	1.38183e-06	5.42553e-05
BCL9L	-1.08712	0.311975	0.454184	4.54739	0.00245096	0.00974607
BCLAF1	0.0767208	0.940931	0.962208	-2.24027	0.0589553	0.119295
BCO2	3.9264	0.00537439	0.0227794	3.37506	0.0113217	0.032494
BCOR	-1.66009	0.139593	0.253868	-2.74109	0.0280455	0.0664632
BCORL1	9.10541	3.28873e-05	0.000580309	1.35513	0.216286	0.325593
BCORP1	1.8105	0.111882	0.215437	1.42081	0.197132	0.303622
BCR	0.954072	0.370924	0.513124	-15.6001	8.0613e-07	3.98224e-05
BCRP3	1.3069	0.231375	0.366199	1.05982	0.323426	0.440813
BCS1L	-1.09526	0.308624	0.450733	-3.21274	0.0142145	0.0389424
BCYRN1	2.0056	0.083716	0.174127	-0.328078	0.752173	0.822184
BDH1	-0.372325	0.720351	0.807502	2.60049	0.0344945	0.07798
BDH2	-5.71117	0.000653303	0.00478305	-6.0023	0.000482632	0.00281389
BDKRB1	-0.222717	0.829932	0.886704	-0.0723731	0.944271	0.961783
BDKRB2	6.64709	0.000255757	0.00243158	9.96217	1.79435e-05	0.000272511
BDNF	-1.50065	0.175893	0.301003	3.22807	0.0139104	0.0383193
BDNF-AS1	1.81825	0.110607	0.213724	0.552443	0.597342	0.696051
BDP1	-0.53167	0.610932	0.722691	-1.95528	0.0902382	0.16602
BECN1	3.95804	0.0051564	0.0220612	-0.737554	0.484086	0.595707
BEGAIN	2.36098	0.0492323	0.118652	7.03164	0.00017895	0.00134817
BEND3	-0.848955	0.423187	0.562568	-2.3924	0.0469796	0.0997829
BEND4	0.691645	0.510806	0.640498	3.17037	0.0150931	0.0408908
BEND5	-2.9459	0.0208146	0.0630648	0.638112	0.543124	0.649317
BEND6	2.13821	0.0686726	0.150882	-0.2998	0.772787	0.838866
BEND7	-2.07595	0.0753693	0.161402	-4.867	0.00167293	0.00723757
BEST1	1.72946	0.12609	0.234928	2.35036	0.0500178	0.104731
BEST2	-3.15441	0.0154388	0.0504696	-0.418346	0.687871	0.772569
BEST3	2.86193	0.0235089	0.069064	2.403	0.0462432	0.0983799
BEST4	0.082733	0.936313	0.958902	-0.836541	0.429694	0.545146
BET1	1.65001	0.141667	0.25674	2.35238	0.0498675	0.104512
BET1L	4.41875	0.00287027	0.0143073	-1.93666	0.0927747	0.169851
BET3L	-3.27394	0.0130404	0.0442775	-0.993192	0.352763	0.470256
BEX1	7.05701	0.000174876	0.00186075	-0.256102	0.805024	0.863343
BEX2	5.29266	0.00102885	0.00669416	-4.10996	0.00423569	0.0148851
BEX4	3.96284	0.00512419	0.0219493	0.826376	0.435074	0.549747
BEX5	0.323169	0.755736	0.833749	0.478203	0.646662	0.737958
BFAR	6.89008	0.000203728	0.00207483	-13.3342	2.41675e-06	7.57484e-05
BFSP1	0.230896	0.82381	0.882981	-2.05018	0.0783267	0.148835
BGLAP	0.415959	0.689539	0.783985	-4.29198	0.00336167	0.0124769
BGN	2.23877	0.0590881	0.135013	-2.38239	0.0476851	0.100968
BHLHA15	-0.151422	0.883791	0.92307	-0.931365	0.381785	0.49874
BHLHB9	2.31925	0.0523951	0.124087	3.1229	0.0161465	0.0431166
BHLHE40	5.01515	0.0014085	0.0084533	-3.10268	0.0166186	0.0440907
BHLHE41	2.50419	0.0397827	0.101763	-3.81047	0.00626267	0.0202856
BHMT	2.43313	0.0442145	0.10979	3.93504	0.0053139	0.0178067
BICC1	0.946329	0.374601	0.516055	-4.50281	0.00258812	0.010164
BICD1	2.20477	0.0621686	0.139993	4.16706	0.00393735	0.0141066
BICD2	-10.6889	1.11138e-05	0.000280219	22.898	5.3222e-08	1.01534e-05
BID	-2.0631	0.0768302	0.163533	-6.40879	0.000321641	0.00207418
BIK	0.366351	0.724615	0.810622	-0.18271	0.860056	0.904172
BIN1	9.97399	1.77999e-05	0.00038294	5.70179	0.000659825	0.00350832
BIN3	-0.788802	0.455371	0.590962	0.263253	0.799719	0.859225
BIRC2	0.351484	0.73527	0.818222	-1.24872	0.250776	0.36465
BIRC3	-2.72276	0.0288098	0.0800814	1.72889	0.126196	0.215754
BIRC5	-13.035	2.83e-06	0.000109228	-2.04254	0.079226	0.150151
BIRC6	0.184245	0.858895	0.906044	2.75801	0.027359	0.0652531
BIVM	4.91896	0.0015744	0.0091441	-5.1511	0.00120603	0.00560155
BK250D10.8	1.92269	0.0947248	0.190192	-3.1509	0.015516	0.0417873
BLCAP	9.93202	1.83157e-05	0.0003908	7.44992	0.000123403	0.00103793
BLK	0.606414	0.562834	0.685867	4.52844	0.00250826	0.00992333
BLM	-11.5833	6.40529e-06	0.000193425	-0.291535	0.778849	0.84273
BLMH	-6.01903	0.000474459	0.00375008	5.25344	0.00107487	0.00513266
BLNK	0.444934	0.669415	0.768018	2.21264	0.0614414	0.123053
BLOC1S1	-2.15395	0.0670754	0.148377	-3.63688	0.00790409	0.0244244
BLOC1S2	-2.07632	0.0753273	0.161388	-11.7551	5.78761e-06	0.000130053
BLOC1S3	-0.841348	0.427166	0.565747	0.219976	0.831987	0.883573
BLVRA	-2.84096	0.0242372	0.0706896	4.93691	0.00154186	0.0068099
BLVRB	-0.295724	0.775775	0.848953	0.682318	0.516347	0.62582
BLZF1	0.00572635	0.995586	0.997067	4.57749	0.00236288	0.00948438
BMF	-3.80709	0.00629085	0.0256641	-0.827067	0.434707	0.549398
BMI1	1.72858	0.126254	0.235122	1.47291	0.183027	0.28656
BMP1	-0.0414737	0.968043	0.980493	-2.52246	0.0387191	0.0851941
BMP2	-0.963143	0.366651	0.50952	-0.0502622	0.961277	0.9723
BMP2K	-2.29707	0.0541587	0.127088	7.84392	8.82587e-05	0.000819436
BMP4	-2.97722	0.0198947	0.0609789	-0.00291253	0.997755	0.998359
BMP5	0.224212	0.828812	0.885928	4.05658	0.00453697	0.015737
BMP6	-8.53968	5.04318e-05	0.000769773	-1.12383	0.297095	0.414242
BMP7	-0.291382	0.778962	0.851518	-12.5569	3.66803e-06	9.89335e-05
BMP8A	0.541915	0.604209	0.717575	-3.28286	0.0128782	0.0359906
BMP8B	0.104187	0.91986	0.947698	-1.60938	0.150311	0.246482
BMPER	-1.13124	0.294165	0.435148	-0.232336	0.822733	0.877086
BMPR1A	1.72173	0.127531	0.236933	2.23238	0.0596551	0.12043
BMPR1B	-5.2936	0.00102778	0.006692	-1.76203	0.120185	0.207698
BMPR2	-8.88892	3.8627e-05	0.000642453	-6.47442	0.000301775	0.00198132
BMS1	2.95784	0.0204586	0.0622352	-10.8017	1.03447e-05	0.000188244
BMS1P1	1.26934	0.243746	0.380153	-0.398822	0.70157	0.783629
BMS1P4	1.44241	0.19117	0.320243	1.06846	0.319764	0.436837
BMS1P5	1.49428	0.17751	0.303029	2.20282	0.0623496	0.124514
BMX	-3.78456	0.00648228	0.026257	3.97741	0.00502771	0.0170552
BNC1	-0.837918	0.428968	0.567151	-0.946558	0.374492	0.491438
BNC2	-9.53189	2.41814e-05	0.00046865	-3.09993	0.0166838	0.044212
BNIP1	0.328855	0.751609	0.831176	-0.0595632	0.954121	0.967749
BNIP2	-4.32431	0.00322815	0.015681	2.93082	0.0212734	0.0535784
BNIP3	10.2615	1.46768e-05	0.000338432	-2.21805	0.0609461	0.122407
BNIP3L	5.55308	0.0007735	0.00541255	5.67849	0.000676338	0.00358042
BNIPL	4.58564	0.00233962	0.0122218	1.54768	0.164375	0.264136
BOC	-4.85822	0.00169024	0.00965666	-1.00693	0.346553	0.464498
BOD1	-1.42326	0.196449	0.32626	-8.31891	5.99775e-05	0.000623402
BOD1L	2.89678	0.0223486	0.0664935	4.3866	0.00298694	0.0113669
BOK	0.314036	0.762383	0.838691	0.839029	0.428384	0.543903
BOLA1	-1.77576	0.117775	0.223117	-1.14791	0.287654	0.404361
BOLA2	0.795631	0.451635	0.587707	-1.91417	0.0959318	0.17405
BOLA3	-4.84977	0.00170708	0.00972519	-4.31979	0.00324644	0.0121285
BOLA3-AS1	1.70042	0.131586	0.242361	-5.09102	0.00129123	0.0059015
BOLL	-0.0665701	0.948732	0.967791	1.56391	0.160562	0.259546
BOP1	-2.43372	0.044176	0.10974	-1.70524	0.13066	0.221594
BORA	-5.30019	0.00102028	0.00665982	-3.28896	0.0127685	0.0357546
BPGM	-3.38623	0.0111473	0.0393336	4.71321	0.0020067	0.00831166
BPHL	2.32438	0.0519951	0.123413	-2.35771	0.0494731	0.103926
BPNT1	-1.1084	0.303278	0.444979	-8.96816	3.64044e-05	0.000436829
BPTF	2.07101	0.0759272	0.162119	0.102605	0.921071	0.948247
BRAF	0.122657	0.905727	0.938308	2.65097	0.0320184	0.0737254
BRAP	4.06447	0.00449104	0.0199031	-2.83252	0.0245371	0.0600447
BRAT1	-1.33582	0.222222	0.355944	-3.14724	0.0155969	0.041968
BRCA1	-23.1825	4.87392e-08	1.33095e-05	-2.0377	0.0798007	0.150941
BRCA2	-6.49572	0.000295628	0.00267109	-1.13041	0.294493	0.411466
BRCC3	-0.395264	0.70408	0.794948	-13.1781	2.6231e-06	7.97416e-05
BRD1	1.62993	0.145878	0.262255	-0.390257	0.707618	0.788608
BRD2	2.82368	0.0248555	0.0720306	0.532264	0.610541	0.70764
BRD3	-12.7912	3.22651e-06	0.000119948	1.26399	0.245553	0.35901
BRD4	-2.24732	0.0583377	0.133786	7.75614	9.49884e-05	0.000860814
BRD7	-0.594565	0.570309	0.691823	-1.65263	0.141124	0.235103
BRD7P3	1.22987	0.25735	0.395366	2.91655	0.0217175	0.0544554
BRD8	-2.12807	0.0697214	0.152376	-8.24466	6.36333e-05	0.000646612
BRD9	2.63321	0.0328681	0.0883316	1.78075	0.116911	0.203361
BRE	-5.83122	0.000575889	0.00434918	-5.74783	0.000628503	0.00339844
BREA2	0.488245	0.639871	0.745464	1.1478	0.287695	0.404361
BRF1	3.92103	0.00541234	0.0228976	1.74749	0.122788	0.21094
BRF2	2.0018	0.0841925	0.174898	0.901712	0.396323	0.512831
BRI3	-2.0571	0.0775212	0.164652	0.0798265	0.938545	0.958691
BRI3BP	-3.19891	0.0144952	0.0480503	-12.7345	3.32757e-06	9.28072e-05
BRIP1	-15.6693	7.81443e-07	4.73528e-05	0.0653933	0.949637	0.965191
BRIX1	-3.09171	0.0168808	0.0538473	-12.0656	4.83464e-06	0.000116102
BRK1	6.99323	0.000185321	0.00194176	6.27518	0.000366765	0.00228258
BRMS1	-2.00214	0.0841494	0.174849	-12.0335	4.92445e-06	0.000116869
BRMS1L	-7.85318	8.75811e-05	0.00113562	-0.983253	0.357311	0.474787
BROX	0.547618	0.600484	0.714832	2.49643	0.0402438	0.0880587
BRP44	-8.08482	7.23862e-05	0.000993119	0.778413	0.461097	0.574758
BRP44L	-2.7988	0.0257746	0.0737769	-0.385716	0.710833	0.790882
BRPF1	-0.0436149	0.966394	0.979556	-3.98732	0.00496325	0.0168712
BRPF3	5.64094	0.000703928	0.00504602	6.39567	0.000325786	0.00209348
BRSK1	-1.11227	0.301719	0.443229	2.61078	0.0339745	0.0770872
BRSK2	4.26322	0.00348556	0.0166135	5.52861	0.000794208	0.00405332
BRWD1	2.18364	0.0641639	0.143279	2.12422	0.0701237	0.136544
BRWD3	-0.160814	0.876652	0.918232	-0.592736	0.571468	0.674242
BSCL2	1.49068	0.178428	0.304168	0.284932	0.783705	0.846171
BSDC1	6.56971	0.00027533	0.00254202	1.13493	0.29271	0.409448
BSG	0.497425	0.633695	0.741036	1.05834	0.324053	0.441469
BSN	0.921553	0.386551	0.527284	2.92771	0.0213693	0.0537752
BSN-AS2	-0.423938	0.68397	0.77975	-0.67415	0.521231	0.629976
BST1	-1.36106	0.214493	0.347082	-2.93417	0.0211705	0.0533934
BST2	-1.10446	0.304876	0.44689	-3.76164	0.00668353	0.0213532
BTAF1	2.34792	0.0502009	0.120364	0.540295	0.605269	0.703045
BTBD1	2.21782	0.0609669	0.138085	-15.1727	9.79784e-07	4.43061e-05
BTBD10	-0.661818	0.52866	0.655597	6.24829	0.000376674	0.00232278
BTBD11	-9.32195	2.80906e-05	0.000520019	13.0087	2.87e-06	8.47613e-05
BTBD17	0.0337691	0.973977	0.983827	-1.77425	0.118037	0.204928
BTBD18	0.515507	0.621621	0.731702	0.585789	0.575883	0.678042
BTBD19	0.0276979	0.978654	0.987015	0.701708	0.504869	0.615479
BTBD2	2.51104	0.0393808	0.101112	-3.4164	0.0106904	0.0310448
BTBD3	-0.573055	0.584025	0.702206	2.33707	0.0510196	0.106363
BTBD6	-1.75541	0.121364	0.227968	2.68328	0.0305307	0.0709469
BTBD7	5.76145	0.000619557	0.00458962	8.03668	7.5282e-05	0.00072987
BTBD8	-0.43049	0.679412	0.776111	1.76276	0.120057	0.207561
BTBD9	-10.1905	1.53867e-05	0.000350781	12.9797	2.91492e-06	8.55047e-05
BTD	-1.19098	0.27138	0.410502	2.98981	0.019537	0.0501832
BTF3	3.26777	0.013154	0.0446023	-4.5401	0.00247282	0.00981516
BTF3L4	1.97231	0.0879766	0.18043	1.71238	0.129296	0.219917
BTG1	2.4161	0.0453498	0.112028	-6.45353	0.000307947	0.00200746
BTG2	24.6936	3.10657e-08	1.12949e-05	16.9427	4.50763e-07	2.89555e-05
BTG3	-6.61395	0.000263943	0.00247306	0.615509	0.557136	0.661843
BTLA	0.477203	0.647341	0.751181	1.50007	0.17604	0.278475
BTN1A1	-11.3352	7.43375e-06	0.000215531	-20.4104	1.20617e-07	1.47584e-05
BTN2A1	2.76984	0.0268889	0.0759821	7.48941	0.00011925	0.00101065
BTN2A2	-2.24082	0.0589069	0.134717	-2.87971	0.0229091	0.0567859
BTN2A3P	-1.12809	0.295407	0.436376	0.165869	0.872814	0.912887
BTN3A1	6.20469	0.000393389	0.00326997	-5.72239	0.000645601	0.00345391
BTN3A2	2.25289	0.0578538	0.132944	-5.01169	0.00141411	0.00634084
BTN3A3	4.00887	0.00482615	0.0210123	-2.22502	0.0603148	0.121519
BTRC	-1.38707	0.206775	0.33826	-1.1469	0.288045	0.404728
BUB1	-16.9043	4.5804e-07	3.66815e-05	-1.25284	0.249358	0.363182
BUB1B	-21.6863	7.83803e-08	1.46669e-05	-4.64156	0.00218674	0.00891119
BUB3	-11.6074	6.31449e-06	0.000191638	-1.55488	0.162671	0.262024
BUD13	-3.57317	0.00861862	0.0324385	-0.975625	0.360832	0.478207
BUD31	-2.0837	0.0745012	0.160222	-6.80835	0.000219773	0.00156676
BVES	3.38663	0.011141	0.0393267	7.714	9.84222e-05	0.000879655
BYSL	-3.27635	0.0129965	0.0442028	-2.18421	0.0641092	0.127301
BZRAP1	8.78609	4.17433e-05	0.000681195	0.17742	0.864059	0.90656
BZW1	-4.21495	0.00370481	0.017372	-2.08797	0.0740275	0.142528
BZW2	-0.266696	0.797168	0.86548	-4.22099	0.00367658	0.01337
C10orf10	1.59557	0.153357	0.271925	3.84561	0.00597766	0.0195446
C10orf103	3.19275	0.0146221	0.0483387	0.492434	0.637049	0.730112
C10orf108	-0.274676	0.791268	0.86095	1.1124	0.301668	0.418723
C10orf11	-1.20228	0.267239	0.406232	-3.24544	0.0135739	0.0375586
C10orf111	-0.430211	0.679606	0.776235	0.273742	0.791958	0.853105
C10orf114	4.48587	0.00264244	0.0134601	5.19211	0.00115146	0.0054005
C10orf118	3.02511	0.0185699	0.0578962	4.57935	0.00235753	0.0094671
C10orf12	0.669888	0.523792	0.65166	-1.43398	0.193477	0.299159
C10orf122	0.149285	0.885418	0.92389	0.736886	0.484468	0.595923
C10orf125	-0.447329	0.667764	0.766466	-0.133521	0.897431	0.931506
C10orf128	-1.03462	0.334287	0.477003	-3.989	0.0049524	0.0168406
C10orf131	1.31453	0.228929	0.363468	1.04529	0.329655	0.447224
C10orf136	0.533218	0.609914	0.721851	1.20506	0.266229	0.381596
C10orf137	-4.53632	0.00248424	0.0127935	2.85881	0.0236158	0.0582002
C10orf140	-7.01451	0.00018176	0.0019166	5.57595	0.00075468	0.00389422
C10orf2	8.76548	4.24014e-05	0.000689458	-16.2053	6.16813e-07	3.47153e-05
C10orf25	4.19791	0.00378578	0.0176511	5.73528	0.000636875	0.00342436
C10orf26	2.06096	0.0770753	0.163881	13.9698	1.74676e-06	6.21417e-05
C10orf28	0.919885	0.387366	0.528118	4.63359	0.00220783	0.00897499
C10orf31	0.924507	0.385111	0.525951	-0.444139	0.669964	0.756947
C10orf32	1.05593	0.325083	0.467427	-1.28739	0.237732	0.350363
C10orf35	-2.25361	0.0577918	0.13292	0.0867048	0.933264	0.955605
C10orf46	7.39124	0.000129877	0.00150768	6.07222	0.000449472	0.00266116
C10orf47	-0.992922	0.352886	0.495836	0.807511	0.445185	0.55995
C10orf53	-0.846852	0.424285	0.563656	-0.912426	0.391024	0.507564
C10orf54	1.43189	0.194053	0.323641	3.08734	0.0169865	0.0448509
C10orf57	-3.72077	0.00705923	0.027916	8.02486	7.60132e-05	0.000735472
C10orf58	-6.11017	0.000432543	0.00350917	-1.63639	0.144511	0.239128
C10orf62	1.71821	0.128193	0.237745	2.06575	0.0765263	0.146193
C10orf68	5.56285	0.000765391	0.00537014	4.43087	0.00282758	0.0109181
C10orf76	2.77665	0.0266227	0.0754441	0.396847	0.702962	0.784623
C10orf82	-0.840139	0.427801	0.566176	-0.500138	0.631876	0.725777
C10orf85	0.0194906	0.984978	0.990426	0.226885	0.82681	0.879959
C10orf88	3.02056	0.0186916	0.0581642	1.5257	0.16967	0.270422
C10orf90	-2.03373	0.0802751	0.169151	0.407829	0.695235	0.778675
C10orf93	3.17539	0.0149861	0.0492912	4.69709	0.00204573	0.00844445
C10orf95	-0.168818	0.870577	0.913807	-2.42046	0.0450563	0.0962716
C11orf1	-1.66166	0.139273	0.253464	-5.19841	0.00114331	0.00537392
C11orf10	-2.40009	0.0464441	0.114096	-13.699	2.0025e-06	6.71651e-05
C11orf16	0.269007	0.795458	0.864065	2.47247	0.0417019	0.0904653
C11orf2	-0.0973762	0.925079	0.951188	-1.25711	0.247895	0.361647
C11orf20	-0.109335	0.915917	0.945458	-2.92796	0.0213614	0.0537629
C11orf21	0.168306	0.870966	0.91405	-2.96629	0.0202106	0.0515226
C11orf24	-13.6063	2.09956e-06	9.25732e-05	2.70877	0.0294077	0.0689434
C11orf30	-2.21147	0.0615488	0.139083	4.03521	0.0046641	0.0160706
C11orf31	0.715995	0.496517	0.627342	-3.5174	0.00930129	0.0277512
C11orf41	-3.70647	0.00719605	0.0282848	-0.989102	0.354629	0.472197
C11orf42	0.105071	0.919182	0.947251	0.773458	0.463844	0.577154
C11orf45	-2.16627	0.0658519	0.146258	-0.502778	0.630108	0.724479
C11orf46	3.49469	0.00959577	0.0351697	-0.860164	0.417373	0.533537
C11orf48	-1.9135	0.0960282	0.191961	-0.147437	0.886824	0.923238
C11orf49	4.11991	0.00418197	0.0189511	2.29991	0.0539303	0.111043
C11orf51	-0.978921	0.359308	0.502334	1.35066	0.217648	0.327265
C11orf54	0.671399	0.522883	0.650927	-4.48575	0.00264282	0.0103222
C11orf57	9.37986	2.69454e-05	0.000505512	-1.01876	0.341269	0.458735
C11orf58	6.80018	0.000221453	0.00219629	4.14289	0.00406074	0.0144236
C11orf61	1.73404	0.125244	0.233663	-2.59994	0.0345227	0.078
C11orf63	0.037664	0.970977	0.982106	2.29204	0.0545671	0.112088
C11orf65	-1.07493	0.317047	0.45947	-0.39125	0.706915	0.788011
C11orf66	3.50967	0.00940038	0.0346773	3.11833	0.0162519	0.0433073
C11orf67	-2.26593	0.0567378	0.131142	3.30948	0.0124066	0.0349999
C11orf68	-1.03725	0.333142	0.475705	-1.75431	0.121561	0.209504
C11orf70	5.55762	0.000769721	0.0053922	0.57878	0.580357	0.681808
C11orf71	1.34431	0.219596	0.352902	2.11869	0.0707057	0.137527
C11orf73	-0.32215	0.756477	0.834313	-1.80588	0.112649	0.197437
C11orf74	-1.64633	0.142429	0.257812	2.92726	0.0213832	0.0538027
C11orf75	-4.35883	0.00309194	0.0151751	-12.0062	5.00241e-06	0.000118102
C11orf80	0.078354	0.939676	0.96125	-5.64895	0.000697934	0.00365852
C11orf82	-14.2488	1.52138e-06	7.536e-05	3.75945	0.00670306	0.0213855
C11orf83	-1.12006	0.298598	0.439852	-2.52303	0.0386865	0.0851643
C11orf84	-3.73279	0.00694647	0.0276383	-3.12657	0.0160623	0.0429469
C11orf87	-0.812247	0.442631	0.579267	-0.220338	0.831716	0.883422
C11orf9	-0.196444	0.849684	0.900749	-15.2037	9.65842e-07	4.41157e-05
C11orf91	-1.09783	0.307572	0.449849	-1.44949	0.189252	0.294228
C11orf94	1.697	0.132248	0.243285	1.01602	0.342485	0.459961
C11orf95	-4.70609	0.00202383	0.0109989	6.29956	0.000358028	0.00224343
C11orf96	-7.4666	0.00012163	0.00143739	0.191957	0.853069	0.89925
C12orf10	0.904762	0.39481	0.535416	-2.7122	0.0292599	0.0687275
C12orf11	2.65178	0.0319803	0.0864618	-7.43578	0.00012493	0.00104563
C12orf23	5.6944	0.000665015	0.00482992	3.78158	0.0065081	0.02089
C12orf24	4.3101	0.00328608	0.015875	-21.084	9.57639e-08	1.30747e-05
C12orf26	1.54384	0.165287	0.287152	1.97746	0.0873047	0.162033
C12orf28	-0.456084	0.661747	0.761434	0.946442	0.374547	0.491474
C12orf29	2.89682	0.0223475	0.0664935	0.346168	0.739096	0.812679
C12orf32	-11.2247	7.9512e-06	0.000223063	-1.10179	0.305958	0.423063
C12orf34	-5.08167	0.00130508	0.00799631	7.50979	0.000117169	0.000997669
C12orf35	0.990124	0.354163	0.497168	2.73178	0.0284313	0.0671673
C12orf39	3.46711	0.00996701	0.0361657	1.48139	0.180819	0.284131
C12orf4	-0.150301	0.884645	0.923401	11.5665	6.46969e-06	0.000138941
C12orf40	0.370474	0.721672	0.808235	0.475788	0.648301	0.739132
C12orf41	-2.35844	0.0494192	0.118961	-2.00477	0.0838202	0.156766
C12orf42	-1.60987	0.150203	0.267778	-1.53084	0.168417	0.268943
C12orf43	2.97086	0.0200779	0.0613851	2.76524	0.0270706	0.0646841
C12orf44	3.51366	0.00934917	0.0345515	4.24548	0.00356446	0.0130435
C12orf45	-0.597323	0.568564	0.690259	-4.06006	0.00451668	0.0156726
C12orf47	-1.69799	0.132056	0.243079	-3.75312	0.00675998	0.0215218
C12orf48	-7.00903	0.00018267	0.00192048	-2.30089	0.0538513	0.110931
C12orf49	1.89865	0.0981724	0.195303	15.1302	9.99256e-07	4.46326e-05
C12orf5	2.48328	0.0410373	0.104251	7.12791	0.000164032	0.0012727
C12orf50	-1.23126	0.25686	0.394713	0.672113	0.522454	0.630824
C12orf51	0.220822	0.831353	0.887704	4.77247	0.00187009	0.00787319
C12orf52	-0.716123	0.496443	0.627338	-2.32499	0.0519479	0.107865
C12orf53	7.57946	0.000110356	0.00133566	-1.12969	0.294775	0.411784
C12orf57	-0.653318	0.533818	0.66056	-1.26977	0.243599	0.356955
C12orf60	-0.844494	0.425517	0.564551	-1.13585	0.292351	0.409116
C12orf61	-0.181587	0.860905	0.907192	-0.355957	0.732058	0.806904
C12orf62	-2.38163	0.0477397	0.116242	-4.85151	0.00170361	0.00733884
C12orf65	-2.74436	0.0279115	0.0782305	4.72115	0.00198778	0.00824454
C12orf66	0.709159	0.500502	0.630798	-4.10854	0.0042434	0.0149048
C12orf68	9.43373	2.59271e-05	0.000491478	6.80559	0.00022034	0.00156677
C12orf69	0.0617794	0.952416	0.970188	3.42213	0.0106059	0.0308537
C12orf71	0.201469	0.845897	0.898012	1.07606	0.316575	0.43386
C12orf73	3.27936	0.0129417	0.0440905	-4.06458	0.00449038	0.0156052
C12orf75	-5.52603	0.000796432	0.00552608	9.22718	3.00854e-05	0.000383931
C12orf76	5.65594	0.000692759	0.00499618	-7.10921	0.000166817	0.00128662
C13orf16	0.89559	0.399375	0.539715	-0.612234	0.559184	0.663451
C13orf27	-4.87335	0.00166053	0.00953465	1.48053	0.181043	0.284335
C13orf30	-2.81821	0.0250546	0.072446	1.93124	0.093526	0.170872
C13orf33	0.22026	0.831774	0.888031	-0.724903	0.491356	0.602724
C13orf44-AS1	1.91149	0.0963155	0.192409	2.77678	0.0266176	0.0638703
C14orf1	-7.31141	0.000139304	0.00157872	2.883	0.0228	0.0565986
C14orf101	-2.91311	0.0218257	0.0652803	0.978684	0.359417	0.476679
C14orf102	-3.43587	0.0104061	0.0373417	-5.20868	0.00113018	0.00532407
C14orf109	-1.78577	0.116048	0.220834	-0.758068	0.47245	0.585007
C14orf118	0.232031	0.822961	0.882423	0.0486252	0.962537	0.973245
C14orf119	0.64305	0.540091	0.666101	-0.551887	0.597704	0.696383
C14orf126	-1.06257	0.322258	0.464283	-4.64452	0.00217897	0.00888348
C14orf128	2.61628	0.0336997	0.0900392	1.71914	0.128019	0.218173
C14orf129	4.31273	0.0032753	0.0158456	4.46942	0.00269637	0.0104985
C14orf132	12.4944	3.79713e-06	0.000135349	2.51375	0.0392223	0.0861034
C14orf133	0.905854	0.394268	0.534881	1.46726	0.184511	0.288362
C14orf135	-2.96725	0.0201827	0.0616122	-9.89248	1.88173e-05	0.000281254
C14orf142	-0.636455	0.544144	0.669518	0.904858	0.394762	0.511503
C14orf149	1.30851	0.230857	0.365698	-1.18523	0.273508	0.38969
C14orf159	6.71236	0.000240454	0.00233007	-9.1049	3.28997e-05	0.00040931
C14orf162	-1.33066	0.223831	0.357653	-0.913415	0.390538	0.507149
C14orf166	1.15218	0.286004	0.426582	-9.48072	2.50742e-05	0.000338149
C14orf167	5.86692	0.000554882	0.00422943	3.91619	0.00544685	0.0181618
C14orf169	-1.24415	0.252357	0.390035	-7.19585	0.000154344	0.00121833
C14orf176	-1.11242	0.301658	0.443193	-3.08012	0.0171625	0.045263
C14orf178	1.88245	0.100564	0.198863	0.941507	0.376905	0.494034
C14orf180	0.86782	0.413435	0.553163	-1.15646	0.284359	0.400881
C14orf182	0.673854	0.521409	0.649626	0.556439	0.594747	0.69405
C14orf183	1.27663	0.2413	0.377373	0.400796	0.700179	0.782764
C14orf19	6.28409	0.000363544	0.00309653	-2.41109	0.0456896	0.097373
C14orf2	-1.1017	0.305996	0.448243	0.058581	0.954876	0.968137
C14orf21	-5.89791	0.00053734	0.00413911	-4.54964	0.00244425	0.00973575
C14orf28	4.06779	0.00447185	0.0198423	4.17536	0.00389594	0.0139941
C14orf33	-2.0217	0.0817294	0.171309	-2.02757	0.0810163	0.152748
C14orf37	-1.83953	0.107174	0.208689	-0.650855	0.535319	0.642942
C14orf39	6.91397	0.00019929	0.00204452	2.1486	0.0676137	0.13268
C14orf43	0.45474	0.662669	0.762157	-0.787574	0.456046	0.570183
C14orf45	5.33261	0.000984223	0.00647095	-0.103094	0.920697	0.94813
C14orf49	-4.9386	0.00153885	0.00900204	-3.72806	0.00699061	0.0221128
C14orf50	2.5333	0.0381014	0.0986685	1.25743	0.247784	0.361544
C14orf55	1.32915	0.224303	0.358071	0.266731	0.797142	0.857369
C14orf64	-3.23984	0.0136813	0.0459217	0.350025	0.73632	0.810657
C14orf79	10.7205	1.0892e-05	0.000276545	4.47574	0.00267548	0.0104328
C14orf80	-6.50989	0.000291615	0.00264666	-0.968457	0.364165	0.481548
C14orf82	0.0751992	0.9421	0.962891	4.84714	0.00171236	0.00736609
C14orf93	-1.53339	0.1678	0.290352	-0.940196	0.377533	0.494614
C15orf17	6.51254	0.00029087	0.00264483	2.65549	0.0318058	0.0733272
C15orf23	-12.5509	3.68005e-06	0.000132329	-2.00481	0.0838146	0.156766
C15orf24	3.3185	0.012251	0.0422682	2.57715	0.035706	0.0799905
C15orf27	-0.596691	0.568964	0.690584	-0.79993	0.449293	0.563728
C15orf29	-1.57355	0.158335	0.278095	-0.290469	0.779632	0.843376
C15orf32	0.0822019	0.936721	0.959145	1.31607	0.228435	0.339775
C15orf33	2.03949	0.0795873	0.168078	1.2763	0.24141	0.354663
C15orf34	-0.947178	0.374197	0.515929	-2.99834	0.0192986	0.0497136
C15orf37	3.04226	0.0181184	0.0568444	1.93798	0.0925928	0.169631
C15orf38	-0.523407	0.616385	0.727142	-2.72517	0.028708	0.067689
C15orf39	0.438081	0.67415	0.771619	-4.78698	0.00183822	0.00776058
C15orf40	0.64949	0.536152	0.662501	-0.747511	0.478415	0.590755
C15orf41	-0.407959	0.695143	0.788237	-2.70995	0.0293571	0.0688824
C15orf42	-22.1184	6.81129e-08	1.4398e-05	-0.913974	0.390263	0.506937
C15orf44	7.89906	8.43067e-05	0.0011026	6.67122	0.000249977	0.00172854
C15orf48	1.60913	0.150364	0.268013	0.365357	0.725325	0.802489
C15orf52	9.82805	1.96681e-05	0.000409767	2.92606	0.0214203	0.0538738
C15orf55	1.45611	0.187473	0.316001	0.303277	0.770241	0.836929
C15orf56	2.36102	0.0492292	0.118652	0.117163	0.909927	0.940664
C15orf57	2.39435	0.0468429	0.114817	4.2192	0.00368494	0.0133977
C15orf58	0.000143176	0.99989	0.99989	0.28123	0.786432	0.84841
C15orf59	-0.164788	0.873635	0.915853	-4.8441	0.0017185	0.00738199
C15orf61	-4.22067	0.00367805	0.0172863	-4.55767	0.00242048	0.00966013
C15orf62	2.12479	0.0700639	0.152886	1.87697	0.101385	0.181673
C15orf63	-0.723078	0.49241	0.623902	-2.59665	0.034691	0.0782637
C16orf13	-0.949138	0.373264	0.51513	-1.27962	0.240305	0.353152
C16orf3	2.11851	0.0707248	0.15392	0.747106	0.478645	0.590855
C16orf42	-1.51854	0.171429	0.295228	1.17556	0.277115	0.393475
C16orf45	-1.16366	0.281611	0.421544	-1.22411	0.25939	0.374346
C16orf46	5.1415	0.00121922	0.00759048	0.209197	0.840081	0.889708
C16orf47	-1.38004	0.208838	0.340521	0.0757908	0.941645	0.960831
C16orf48	0.991899	0.353353	0.496337	-0.219639	0.83224	0.883646
C16orf5	-7.61824	0.000106757	0.00130076	-1.87106	0.102278	0.182931
C16orf52	-2.792	0.0260317	0.0743081	1.43567	0.193012	0.298568
C16orf53	0.582241	0.578145	0.697603	-4.39777	0.00294584	0.0112504
C16orf55	-0.355682	0.732256	0.816026	1.26221	0.246156	0.359716
C16orf57	-10.1182	1.6148e-05	0.000362286	4.14371	0.00405649	0.0144142
C16orf58	1.78177	0.116735	0.221701	-0.594285	0.570487	0.673477
C16orf59	-7.84826	8.79404e-05	0.00113864	-3.59595	0.00835543	0.0254971
C16orf61	-8.27861	6.19315e-05	0.000887769	-1.09835	0.30736	0.424485
C16orf62	2.95792	0.0204563	0.0622352	-2.35386	0.0497577	0.104364
C16orf7	3.32265	0.0121801	0.0421062	4.14798	0.00403442	0.0143638
C16orf70	-3.06709	0.0174855	0.0553585	-1.02536	0.338352	0.455757
C16orf71	0.760577	0.47104	0.605076	1.09911	0.307051	0.424284
C16orf72	-1.95189	0.0906945	0.184308	5.64854	0.000698243	0.00365908
C16orf73	0.791885	0.453682	0.589569	1.0865	0.312234	0.429519
C16orf74	-0.584984	0.576395	0.696166	-1.14343	0.289393	0.40612
C16orf79	1.04938	0.327892	0.470314	2.56553	0.0363251	0.0810748
C16orf80	-7.046	0.000176631	0.00187448	-8.55086	4.99962e-05	0.000544893
C16orf86	0.505163	0.628514	0.737145	1.56291	0.160794	0.259873
C16orf87	-0.918909	0.387843	0.528491	3.35283	0.0116775	0.0333049
C16orf88	-7.37727	0.000131474	0.00152137	-10.8642	9.94445e-06	0.000183347
C16orf89	0.733136	0.486617	0.618789	0.965926	0.365348	0.482678
C16orf90	-1.18492	0.273623	0.413002	1.54324	0.165431	0.26527
C16orf91	-2.38468	0.0475226	0.115899	-3.63098	0.00796754	0.0245756
C16orf93	-0.197358	0.848995	0.900092	1.07735	0.316037	0.433309
C16orf95	-1.43493	0.193217	0.322662	0.364087	0.726234	0.8032
C16orf96	2.03517	0.0801019	0.168871	0.366251	0.724686	0.801928
C17orf100	4.06155	0.00450799	0.0199637	2.32593	0.0518754	0.107739
C17orf101	-2.30639	0.0534104	0.125803	-5.19832	0.00114343	0.00537392
C17orf102	0.708373	0.500962	0.631203	-1.77689	0.117579	0.20425
C17orf103	-5.15103	0.00120612	0.00753474	5.46711	0.000849041	0.00427644
C17orf104	1.29568	0.235012	0.37028	-3.39691	0.0109831	0.0317176
C17orf106-CDK3	1.84731	0.105946	0.206851	-0.978588	0.359462	0.476704
C17orf107	-2.35097	0.0499729	0.119903	-1.02857	0.336939	0.454257
C17orf108	2.74698	0.0278045	0.0779788	1.41338	0.19922	0.306164
C17orf109	0.130626	0.89964	0.933693	2.20996	0.0616875	0.123445
C17orf110	-0.587603	0.574728	0.695095	0.135032	0.896278	0.930469
C17orf28	2.17027	0.0654591	0.145528	1.38039	0.208734	0.317113
C17orf39	-3.9772	0.00502909	0.0216695	6.06527	0.00045265	0.0026708
C17orf42	-2.39431	0.0468459	0.114817	-0.462715	0.657206	0.746793
C17orf46	1.45688	0.187267	0.315742	3.07784	0.0172187	0.0453798
C17orf47	-0.577326	0.581287	0.699862	-0.218468	0.833118	0.88424
C17orf48	5.09388	0.00128704	0.00792315	-0.0250651	0.980683	0.985943
C17orf50	1.90752	0.0968861	0.193294	1.93601	0.0928648	0.169975
C17orf51	-2.55301	0.0370047	0.0966674	-3.84543	0.00597908	0.0195449
C17orf53	-15.604	8.0474e-07	4.81229e-05	-1.11342	0.301258	0.418346
C17orf56	-0.0313621	0.975831	0.984897	2.68841	0.030301	0.0705304
C17orf57	1.64627	0.142443	0.257812	0.315054	0.761641	0.830188
C17orf58	-2.44613	0.0433679	0.108488	0.196309	0.849786	0.896542
C17orf59	0.325926	0.753734	0.832571	0.619327	0.554754	0.660004
C17orf61	-2.11773	0.0708071	0.154027	0.747203	0.47859	0.590851
C17orf61-PLSCR3	2.12886	0.0696392	0.152288	1.99787	0.0846877	0.158145
C17orf62	0.363868	0.72639	0.811869	4.73709	0.00195038	0.00814329
C17orf63	-3.10705	0.0165153	0.0529465	10.7415	1.07471e-05	0.000192296
C17orf65	-2.79045	0.0260908	0.0744124	1.46855	0.184172	0.287931
C17orf67	1.0671	0.320341	0.462144	-0.129245	0.900695	0.934201
C17orf69	4.08382	0.00438042	0.0195896	2.34354	0.0505299	0.105621
C17orf70	-2.37948	0.0478929	0.116448	1.53246	0.168024	0.268504
C17orf72	2.00971	0.0832047	0.17346	1.43581	0.192973	0.298558
C17orf75	1.85349	0.10498	0.205474	-3.14027	0.0157521	0.0422761
C17orf76	-0.886172	0.404104	0.544445	-3.77086	0.00660178	0.0211255
C17orf76-AS1	9.5089	2.4578e-05	0.000474314	-4.92087	0.0015709	0.00689626
C17orf78	-1.36902	0.212105	0.344488	-1.73999	0.124151	0.21304
C17orf79	-3.61289	0.00816534	0.0312106	-4.49492	0.00261326	0.0102277
C17orf80	4.98905	0.00145151	0.008626	6.46054	0.00030586	0.00199864
C17orf81	-1.67106	0.137372	0.250706	-3.40886	0.0108027	0.0313058
C17orf82	-1.92711	0.0941027	0.18927	-0.85208	0.421561	0.537491
C17orf85	2.24352	0.0586698	0.134293	3.35603	0.0116257	0.0331832
C17orf89	-4.64045	0.00218967	0.0116562	-2.93832	0.0210437	0.0531778
C17orf90	1.13401	0.293072	0.433997	-2.2167	0.0610697	0.122537
C17orf96	3.53225	0.00911404	0.0338892	-7.52671	0.000115472	0.000988312
C17orf97	7.36088	0.000133375	0.00153945	6.43877	0.00031239	0.00202964
C18orf1	-2.00745	0.0834852	0.173846	3.63703	0.00790252	0.0244236
C18orf10	-11.13	8.42689e-06	0.00023211	7.87883	8.57332e-05	0.000800967
C18orf18	-0.421758	0.685489	0.781041	-1.79635	0.114247	0.199528
C18orf19	5.80464	0.000592108	0.00443691	1.70111	0.131454	0.222636
C18orf21	1.17205	0.278437	0.418259	0.765322	0.468381	0.581406
C18orf23	0.638717	0.542752	0.668429	2.30896	0.0532062	0.109963
C18orf25	-10.5313	1.22995e-05	0.000301743	-6.25899	0.000372697	0.00230687
C18orf32	-4.00249	0.0048663	0.0211082	0.745706	0.479439	0.591539
C18orf42	-2.79112	0.0260652	0.0743627	0.93617	0.379467	0.496354
C18orf45	-0.866137	0.414298	0.55413	-1.13354	0.293259	0.41012
C18orf54	-3.59058	0.00841674	0.0319099	-2.52736	0.0384387	0.084731
C18orf55	-5.70966	0.000654354	0.00478305	-2.74799	0.0277632	0.0659659
C18orf56	-2.27783	0.0557376	0.129571	0.872189	0.411199	0.527411
C18orf61	-0.694018	0.509402	0.639222	1.37238	0.211103	0.31991
C18orf8	-1.04056	0.331702	0.474206	1.22031	0.260743	0.375538
C19orf10	1.98302	0.0865836	0.178317	1.92756	0.0940403	0.17147
C19orf12	-0.350798	0.735764	0.818721	-0.123208	0.905306	0.936978
C19orf18	-0.913232	0.390628	0.531242	-1.6496	0.141752	0.235958
C19orf2	3.04191	0.0181277	0.0568471	-3.58852	0.00844034	0.0256927
C19orf20	-0.0886625	0.931762	0.95607	-0.680169	0.51763	0.626831
C19orf21	1.9365	0.0927975	0.187215	0.45176	0.664715	0.752654
C19orf22	1.50808	0.174026	0.298567	2.69457	0.0300278	0.0700379
C19orf23	1.41928	0.197559	0.327506	2.01748	0.0822456	0.154505
C19orf24	-1.90046	0.0979081	0.194926	-2.56681	0.0362566	0.0809616
C19orf25	-1.05251	0.326545	0.468973	1.46321	0.185583	0.289713
C19orf26	3.66196	0.00764067	0.0295972	3.08633	0.0170109	0.0449021
C19orf28	2.33737	0.0509973	0.121728	0.528008	0.613346	0.710056
C19orf29	-1.75921	0.120686	0.226976	-2.02183	0.0817137	0.153824
C19orf29-AS1	0.390738	0.707277	0.797618	1.63531	0.144739	0.239396
C19orf34	-1.05169	0.326899	0.469297	0.764437	0.468876	0.581862
C19orf35	1.00272	0.348445	0.491609	1.81265	0.111527	0.195927
C19orf38	2.10422	0.0722514	0.156439	1.75008	0.122321	0.210372
C19orf39	2.79525	0.0259084	0.0740783	-4.39137	0.00296931	0.0113164
C19orf40	-7.75427	9.51376e-05	0.00120188	5.53142	0.000791798	0.00404783
C19orf42	-3.61681	0.00812209	0.0310957	-2.30545	0.0534859	0.110391
C19orf43	-2.32314	0.0520916	0.123561	-4.68827	0.00206744	0.00851086
C19orf44	2.60149	0.034444	0.0916105	1.92074	0.0949987	0.172785
C19orf45	2.19983	0.0626294	0.140804	-1.68647	0.134306	0.226509
C19orf46	0.00174796	0.998653	0.99908	-1.84679	0.106028	0.187937
C19orf47	-2.55247	0.0370347	0.0967275	1.16901	0.279584	0.396136
C19orf48	-2.13272	0.0692386	0.151722	-3.58333	0.00850019	0.0258161
C19orf50	0.275912	0.790355	0.860198	-2.32327	0.0520815	0.108118
C19orf51	0.17605	0.865096	0.909682	-3.73271	0.00694717	0.0220214
C19orf52	-0.576466	0.581838	0.700247	1.93834	0.0925435	0.169573
C19orf53	-2.66564	0.0313339	0.0850827	-2.41913	0.0451454	0.096428
C19orf54	1.41446	0.198916	0.328975	-3.99228	0.00493133	0.0167879
C19orf55	-0.819271	0.438863	0.575828	-1.30223	0.232882	0.344945
C19orf56	0.121545	0.906577	0.938802	-1.45293	0.188325	0.29299
C19orf57	-3.69173	0.00734009	0.028702	2.31252	0.0529236	0.109504
C19orf6	0.336425	0.746128	0.827166	0.890253	0.40205	0.518764
C19orf60	-1.08994	0.31081	0.452976	-1.40748	0.200893	0.308085
C19orf63	-2.65876	0.0316528	0.0857677	-2.07809	0.0751285	0.144055
C19orf66	-0.522162	0.617208	0.727783	0.94556	0.374967	0.491955
C19orf68	-0.948385	0.373622	0.51541	-4.27032	0.0034545	0.012746
C19orf70	-2.60347	0.0343433	0.0914423	-4.16045	0.00397072	0.0141982
C19orf71	4.23497	0.00361211	0.0170469	1.47671	0.182033	0.285373
C19orf73	-0.591583	0.572199	0.693237	-2.8125	0.025264	0.0613264
C19orf76	2.44262	0.0435944	0.1088	-1.62425	0.14709	0.242447
C19orf77	-2.96338	0.0202956	0.061905	-1.36832	0.212313	0.321289
C19orf79	-1.04241	0.330898	0.473467	-2.8132	0.0252382	0.0612803
C19orf81	-0.261324	0.801149	0.867863	1.98862	0.0858641	0.1598
C1D	-0.0419658	0.967664	0.980282	1.16627	0.280619	0.397056
C1GALT1	-0.54138	0.604559	0.717897	-5.49942	0.000819725	0.0041567
C1GALT1C1	0.768469	0.466623	0.601186	0.711944	0.498876	0.610055
C1orf100	3.03461	0.0183184	0.0573069	3.53871	0.00903379	0.0271063
C1orf101	1.13539	0.292533	0.433412	1.27962	0.240303	0.353152
C1orf106	-5.04404	0.00136251	0.00825084	-5.10427	0.00127189	0.00584061
C1orf109	0.721127	0.49354	0.624706	-2.7821	0.0264113	0.0635095
C1orf110	-2.04544	0.0788833	0.167038	2.42855	0.0445172	0.0953667
C1orf111	-0.463584	0.656613	0.757685	-0.68843	0.512712	0.62241
C1orf112	-18.1585	2.76272e-07	2.90309e-05	0.371204	0.721151	0.799475
C1orf114	4.4346	0.00281457	0.0141026	2.37914	0.047917	0.101324
C1orf115	-3.47804	0.00981813	0.0357325	-1.30218	0.232898	0.344945
C1orf116	-1.6301	0.145842	0.262216	2.15453	0.0670177	0.131827
C1orf122	-0.560379	0.592195	0.707932	-1.97639	0.0874439	0.162208
C1orf123	-1.01828	0.341483	0.484418	-4.60093	0.00229668	0.00926365
C1orf124	-0.674152	0.52123	0.649537	2.06767	0.0763074	0.145882
C1orf126	0.282469	0.785519	0.856729	4.03196	0.00468375	0.0161353
C1orf127	-1.63557	0.144683	0.260595	0.0285427	0.978003	0.983848
C1orf131	0.553025	0.596964	0.711759	0.2603	0.801908	0.861068
C1orf133	-1.79667	0.114194	0.218312	1.78126	0.116823	0.203247
C1orf135	-8.32334	5.97674e-05	0.000868514	-2.16778	0.0657029	0.129687
C1orf144	-6.79843	0.000221815	0.00219629	3.17237	0.0150504	0.0408187
C1orf151	1.5656	0.160168	0.280348	0.557313	0.594181	0.693611
C1orf159	-2.4147	0.0454447	0.112186	-0.0377883	0.970881	0.979079
C1orf162	1.56794	0.159627	0.279752	-1.23497	0.255559	0.370154
C1orf168	-2.16903	0.0655805	0.145762	5.83309	0.000574768	0.00319435
C1orf170	-1.02216	0.339762	0.482467	-0.0445957	0.965639	0.975188
C1orf173	-0.321911	0.75665	0.834381	4.60712	0.00227954	0.00921293
C1orf174	-3.74473	0.00683625	0.0273435	-1.70615	0.130485	0.221401
C1orf182	-0.405421	0.696926	0.789487	-0.761374	0.470593	0.583594
C1orf183	2.4984	0.0401265	0.102467	-2.12313	0.070238	0.136752
C1orf185	2.11614	0.0709758	0.154307	0.10281	0.920914	0.948193
C1orf189	1.41558	0.198601	0.328694	4.73212	0.00196194	0.0081652
C1orf190	-2.1724	0.0652508	0.145219	-0.367003	0.724149	0.801675
C1orf191	-0.899918	0.397216	0.537565	-1.02605	0.338047	0.455447
C1orf192	10.9461	9.4461e-06	0.000248871	-6.32682	0.000348534	0.00220306
C1orf194	0.32881	0.751641	0.831176	-1.70064	0.131545	0.222657
C1orf198	8.60149	4.80751e-05	0.000752763	12.6089	3.56432e-06	9.72139e-05
C1orf201	-1.06409	0.321614	0.46365	3.21924	0.0140847	0.0386951
C1orf204	1.01409	0.343347	0.48606	3.2913	0.0127267	0.035676
C1orf21	-1.77151	0.118515	0.224123	8.70653	4.4349e-05	0.000504553
C1orf212	0.956261	0.369889	0.512435	2.02012	0.0819225	0.154089
C1orf213	1.94246	0.0919776	0.18597	1.58935	0.154749	0.252032
C1orf216	-8.33031	5.94376e-05	0.000866492	3.89776	0.00558029	0.0184982
C1orf220	-0.590989	0.572576	0.693462	-0.778729	0.460922	0.574608
C1orf226	-2.38929	0.0471974	0.115369	-4.04375	0.00461284	0.0159393
C1orf227	0.113457	0.912762	0.943272	-1.58021	0.156815	0.254712
C1orf228	3.48027	0.00978803	0.0356515	2.5869	0.0351948	0.0791252
C1orf229	5.26807	0.00105744	0.00681431	0.125044	0.903903	0.93653
C1orf27	1.34595	0.219091	0.352393	-0.267027	0.796923	0.857184
C1orf31	-2.36938	0.048619	0.117548	-6.33139	0.000346971	0.00219623
C1orf35	-1.5293	0.168792	0.291687	-2.98847	0.0195748	0.0502542
C1orf38	2.15339	0.0671317	0.148466	1.73796	0.124523	0.213483
C1orf43	12.0511	4.87509e-06	0.000162019	2.13781	0.0687138	0.134389
C1orf50	1.595	0.153484	0.27208	-5.11183	0.00126099	0.00579901
C1orf51	-3.2968	0.0126288	0.043268	-12.041	4.90335e-06	0.000116758
C1orf52	4.80699	0.00179528	0.010101	-0.404493	0.697578	0.780603
C1orf54	-0.918019	0.388278	0.528965	-1.16304	0.281846	0.398258
C1orf55	-0.255915	0.805163	0.870891	0.229144	0.82512	0.878919
C1orf56	2.97172	0.020053	0.0613296	0.53679	0.607567	0.704803
C1orf61	2.35439	0.0497183	0.119459	-1.32755	0.224807	0.335311
C1orf63	8.53591	5.05799e-05	0.000770739	5.07089	0.00132125	0.0060168
C1orf70	-0.996478	0.35127	0.494251	-0.840912	0.427395	0.543064
C1orf74	0.16709	0.871888	0.914444	0.265055	0.798384	0.858263
C1orf85	-4.05608	0.00453992	0.020061	-4.04898	0.00458179	0.0158501
C1orf86	-0.0181259	0.98603	0.991006	0.0494114	0.961932	0.972741
C1orf9	2.76092	0.0272424	0.0767382	-3.25362	0.0134184	0.0371907
C1orf93	1.53542	0.167308	0.289758	-8.70685	4.43382e-05	0.000504553
C1orf95	0.316317	0.760721	0.837503	-3.14549	0.0156358	0.0420477
C1orf96	1.28262	0.239309	0.375238	4.99786	0.00143682	0.00641928
C1orf98	-1.21071	0.264184	0.4027	0.617152	0.55611	0.661185
C1QBP	-0.305625	0.768523	0.843659	-12.4737	3.84098e-06	0.000101263
C1QL1	-0.829437	0.433449	0.571001	2.03526	0.0800914	0.151372
C1QL3	-3.24807	0.0135237	0.0455257	-1.21196	0.263734	0.378766
C1QL4	-2.08489	0.0743693	0.160033	-2.23921	0.0590493	0.119432
C1QTNF1	1.6453	0.142644	0.258074	4.0016	0.0048719	0.0166166
C1QTNF2	-2.26298	0.0569887	0.131522	0.753822	0.474843	0.587263
C1QTNF3	0.919947	0.387335	0.528116	2.77536	0.0266727	0.0639687
C1QTNF4	-1.10353	0.305253	0.447407	-2.01584	0.0824471	0.154755
C1QTNF6	-7.31189	0.000139245	0.00157872	-8.63111	4.699e-05	0.000522853
C1QTNF9	3.89581	0.00559463	0.0234667	1.34103	0.220608	0.330484
C1QTNF9B-AS1	2.51089	0.0393893	0.101112	1.03739	0.333079	0.450658
C1R	-6.84327	0.00021275	0.00214211	-2.11063	0.0715629	0.138856
C1RL	2.17632	0.0648697	0.144518	-5.81771	0.000584072	0.00322633
C1S	3.13453	0.0158814	0.0515503	2.21264	0.0614417	0.123053
C2	-2.14154	0.0683312	0.15021	-0.403877	0.698011	0.780822
C20orf103	2.92395	0.0214859	0.0645073	4.17809	0.00388242	0.0139649
C20orf107	0.642621	0.540355	0.666244	1.57538	0.157915	0.256225
C20orf108	-0.493414	0.63639	0.742884	2.04977	0.0783748	0.148863
C20orf11	5.95636	0.000505901	0.00394918	5.86019	0.000558779	0.00312844
C20orf111	-3.36263	0.0115193	0.0403174	3.15377	0.0154529	0.0416732
C20orf112	16.0327	6.65087e-07	4.33355e-05	21.1167	9.47161e-08	1.30747e-05
C20orf118	-1.39204	0.205329	0.336687	-0.956746	0.36966	0.487031
C20orf132	4.09812	0.00430059	0.0193229	2.48778	0.0407641	0.0888943
C20orf134	3.24891	0.0135077	0.0454819	1.67008	0.13757	0.230709
C20orf144	-0.58741	0.574851	0.695105	1.2269	0.258399	0.373287
C20orf152	0.689334	0.512175	0.641556	-0.38199	0.713476	0.793144
C20orf160	-0.650098	0.535781	0.662177	-0.109005	0.916169	0.945182
C20orf165	4.02134	0.00474869	0.0207665	1.24119	0.253384	0.367719
C20orf166-AS1	-0.362046	0.727694	0.813076	-1.76381	0.11987	0.207319
C20orf177	-1.14183	0.290014	0.43119	-7.50058	0.000118105	0.00100329
C20orf194	15.8053	7.35378e-07	4.58881e-05	16.8626	4.66101e-07	2.95235e-05
C20orf195	1.49706	0.176803	0.302191	1.97012	0.0882644	0.163264
C20orf196	1.17057	0.278992	0.41887	3.75016	0.0067868	0.0215883
C20orf197	1.41571	0.198564	0.328662	-0.758987	0.471933	0.584698
C20orf20	-11.0497	8.85587e-06	0.000239457	-4.67448	0.0021019	0.00861954
C20orf201	-2.5973	0.0346575	0.092022	-1.05717	0.324556	0.441955
C20orf202	2.03174	0.0805134	0.169444	0.388061	0.709172	0.789805
C20orf24	-4.95432	0.00151104	0.00887896	-1.996	0.0849243	0.158505
C20orf26	3.09932	0.0166985	0.0533969	1.56878	0.159434	0.258228
C20orf27	-2.79986	0.0257346	0.0737124	-14.4888	1.35364e-06	5.37288e-05
C20orf29	-3.7488	0.00679914	0.0272376	-2.33939	0.0508434	0.10608
C20orf3	10.0596	1.6798e-05	0.000369699	3.41399	0.010726	0.0311284
C20orf30	-1.03613	0.33363	0.476251	2.23837	0.0591229	0.119515
C20orf4	-4.1944	0.00380273	0.0177029	-0.197584	0.848824	0.89594
C20orf43	-1.12426	0.296925	0.438133	-1.23144	0.256797	0.371473
C20orf46	2.26609	0.0567246	0.13114	0.0800595	0.938366	0.958562
C20orf7	0.553435	0.596697	0.711582	2.5598	0.0366346	0.0815752
C20orf72	-15.7706	7.46831e-07	4.61791e-05	-17.5795	3.47397e-07	2.51077e-05
C20orf94	-1.55223	0.163297	0.284756	1.47717	0.181915	0.285249
C20orf96	2.79403	0.0259547	0.0741521	-0.115742	0.911014	0.941466
C21orf119	-0.0100932	0.99222	0.994628	1.28497	0.238528	0.351325
C21orf2	1.23321	0.256176	0.394062	1.00919	0.345535	0.463338
C21orf30	-3.80263	0.00632825	0.0257709	3.45409	0.0101476	0.0297825
C21orf33	3.26715	0.0131654	0.0446186	0.251305	0.808589	0.866145
C21orf49	0.412938	0.691653	0.78588	1.2016	0.267486	0.383066
C21orf56	-1.87068	0.102337	0.201558	0.297225	0.774674	0.840112
C21orf58	-6.71926	0.000238896	0.00232222	1.62087	0.147816	0.243379
C21orf59	0.617979	0.555594	0.679139	-2.45845	0.0425804	0.0919104
C21orf62	0.496436	0.634359	0.741346	1.21758	0.261715	0.376611
C21orf63	-0.00211578	0.998369	0.99908	-2.05659	0.0775809	0.147572
C21orf67	-0.537742	0.606943	0.719693	3.2764	0.0129955	0.0362728
C21orf7	3.86859	0.00579892	0.0241288	11.0942	8.61531e-06	0.000165034
C21orf71	-0.769496	0.46605	0.60073	0.25599	0.805107	0.863381
C21orf88	-3.19523	0.0145708	0.0482482	-0.546514	0.601204	0.699474
C21orf90	-1.48011	0.18115	0.307769	-0.0844839	0.934969	0.956435
C21orf91	-4.7422	0.00193853	0.0106501	3.06953	0.0174244	0.0458141
C22orf13	-4.99011	0.00144973	0.00862507	-0.0456021	0.964864	0.97473
C22orf15	-0.107607	0.91724	0.94604	-1.13925	0.291019	0.40796
C22orf23	2.67478	0.0309149	0.0842443	2.59394	0.0348301	0.0784702
C22orf24	-1.2631	0.245855	0.382785	-1.36803	0.212401	0.321368
C22orf25	0.225886	0.827558	0.885204	4.18515	0.00384768	0.0138729
C22orf26	-0.0312636	0.975907	0.984897	0.649611	0.536078	0.643386
C22orf28	-1.53365	0.167735	0.290319	-4.79083	0.00182988	0.00774336
C22orf29	2.33486	0.0511883	0.12204	-2.18366	0.0641611	0.127376
C22orf32	-2.17188	0.0653017	0.145284	4.13217	0.00411682	0.0145659
C22orf36	1.57368	0.158305	0.278095	1.48579	0.179684	0.282763
C22orf37	0.600523	0.566543	0.688817	1.65258	0.141134	0.235103
C22orf39	1.69613	0.132418	0.243548	3.22835	0.0139048	0.0383109
C22orf40	-2.61715	0.0336564	0.0899765	-0.272289	0.793031	0.854008
C22orf43	5.06715	0.00132692	0.00809737	3.14001	0.0157579	0.0422761
C22orf45	2.39589	0.0467358	0.114611	3.70295	0.0072302	0.0227047
C22orf46	-10.8177	1.02402e-05	0.000263678	8.86019	3.94705e-05	0.000462328
C2CD2	6.35176	0.000340094	0.00295506	-1.64505	0.142695	0.237026
C2CD2L	0.726286	0.490558	0.622352	1.34117	0.220562	0.33047
C2CD3	-6.20008	0.000395204	0.00327756	2.93567	0.0211245	0.0533069
C2CD4C	2.79069	0.0260816	0.0743979	-1.92129	0.0949217	0.172662
C2CD4D	-1.57617	0.157734	0.277558	0.159016	0.878018	0.916481
C2orf15	1.47632	0.182136	0.308924	1.86294	0.103519	0.184551
C2orf16	7.46606	0.000121687	0.00143739	3.43117	0.0104741	0.030519
C2orf18	0.382785	0.712912	0.802031	2.23909	0.05906	0.119441
C2orf27A	1.56395	0.160552	0.280857	2.68781	0.030328	0.0705751
C2orf28	-0.651388	0.534994	0.661474	-6.18337	0.000401863	0.00243434
C2orf29	2.59932	0.0345544	0.0918368	4.77934	0.00185493	0.00781841
C2orf3	-0.479344	0.645889	0.750454	0.179086	0.862798	0.905955
C2orf40	-1.36293	0.21393	0.346585	-0.341052	0.742786	0.815036
C2orf42	-0.753652	0.474939	0.608494	2.29371	0.0544317	0.111898
C2orf43	4.78803	0.00183596	0.0102853	-1.04383	0.330283	0.447841
C2orf44	-2.24747	0.0583247	0.133786	0.721844	0.493125	0.604476
C2orf47	0.380044	0.714858	0.803525	-15.8253	7.28877e-07	3.75982e-05
C2orf48	-1.61287	0.149548	0.26711	0.458741	0.659925	0.748887
C2orf49	-0.613552	0.558359	0.681327	0.722735	0.492609	0.603934
C2orf50	-1.17938	0.275686	0.415425	0.716288	0.496347	0.607452
C2orf55	1.33325	0.223021	0.356798	2.98837	0.0195776	0.0502544
C2orf56	3.22966	0.0138791	0.0464314	0.269121	0.795374	0.856087
C2orf61	-0.832074	0.432052	0.569939	0.430099	0.679684	0.765503
C2orf63	8.51295	5.14911e-05	0.000780929	7.09638	0.000168759	0.0012972
C2orf65	-1.63588	0.144619	0.260541	-1.37357	0.210751	0.319536
C2orf66	-0.354072	0.733411	0.816853	1.86484	0.103227	0.184157
C2orf67	0.569655	0.58621	0.703878	0.259741	0.802323	0.861412
C2orf68	-4.48447	0.00264698	0.0134751	1.0349	0.334164	0.451622
C2orf69	1.03799	0.332818	0.475366	9.16031	3.15893e-05	0.000397964
C2orf70	0.764607	0.468781	0.603112	-3.16685	0.0151686	0.0410586
C2orf72	-2.63409	0.0328252	0.0882736	-7.73225	9.69187e-05	0.000870927
C2orf73	1.00099	0.349228	0.492235	1.47923	0.181379	0.284666
C2orf74	-2.43696	0.0439633	0.109451	3.06792	0.0174646	0.0458998
C2orf76	-0.800776	0.448833	0.585235	-0.50695	0.62732	0.722284
C2orf77	1.97534	0.0875806	0.179922	3.11025	0.0164399	0.0437124
C2orf81	6.64165	0.00025708	0.0024338	0.452832	0.663979	0.752125
C2orf82	2.88279	0.0228071	0.0675316	1.94874	0.0911218	0.167391
C2orf84	0.766539	0.4677	0.602096	2.37788	0.0480068	0.101455
C2orf85	3.49968	0.0095302	0.0350115	-3.38351	0.0111895	0.0321959
C2orf88	1.15254	0.285866	0.426418	1.67438	0.136706	0.229684
C3	1.32101	0.226869	0.361172	-1.29411	0.235525	0.347781
C3AR1	-1.86921	0.10256	0.201909	1.07749	0.315977	0.433292
C3orf14	-1.98442	0.0864025	0.178146	7.76774	9.40671e-05	0.000857705
C3orf15	1.02002	0.340713	0.483552	-0.163963	0.874261	0.913982
C3orf17	5.71908	0.000647865	0.00475668	1.44516	0.190422	0.295668
C3orf18	0.979279	0.359142	0.502143	-1.46712	0.184548	0.288394
C3orf19	1.91412	0.0959395	0.191827	0.339846	0.743656	0.815522
C3orf21	-4.48808	0.00263527	0.0134343	1.68368	0.134856	0.227247
C3orf23	11.9729	5.09907e-06	0.000166421	4.7363	0.00195222	0.00814723
C3orf25	-0.456649	0.661359	0.761085	-0.643895	0.539573	0.646599
C3orf26	-10.065	1.67369e-05	0.000369247	-46.436	3.35732e-10	7.47823e-07
C3orf27	-0.951714	0.372041	0.513931	0.124528	0.904298	0.936552
C3orf32	-1.61063	0.150036	0.267578	0.484367	0.64249	0.734765
C3orf33	7.66626	0.000102482	0.00126307	3.13506	0.0158694	0.0425125
C3orf35	-0.0728081	0.943937	0.964415	-1.21883	0.261272	0.376121
C3orf37	-1.96424	0.0890414	0.181936	1.27092	0.243214	0.356535
C3orf38	-7.44773	0.000123638	0.00145477	4.67769	0.00209382	0.00859418
C3orf39	-9.38765	2.67953e-05	0.000503735	5.78539	0.00060417	0.0033082
C3orf45	-0.570745	0.585509	0.703408	-0.809317	0.44421	0.558843
[truncated: 16,181 more rows]

## Sheet: REACTOME
	shTEAD4 vs. control				shMYCN vs. control
	NES	p-value	FDR	log10P(+-)	NES	p-value	FDR	log10P(+-)
REACTOME_3_UTR_MEDIATED_TRANSLATIONAL_REGULATION	3.34213	0.000831394	0.0130836	3.08019	-3.64827	0.000264012	0.012163	-3.57838
REACTOME_PEPTIDE_CHAIN_ELONGATION	3.18577	0.00144369	0.0176451	2.84053	-3.80135	0.000143908	0.012163	-3.84192
REACTOME_NONSENSE_MEDIATED_DECAY_ENHANCED_BY_THE_EXON_JUNCTION_COMPLEX	3.09023	0.002	0.0212886	2.69897	-3.50359	0.000459036	0.012163	-3.33815
REACTOME_ACTIVATION_OF_THE_MRNA_UPON_BINDING_OF_THE_CAP_BINDING_COMPLEX_AND_EIFS_AND_SUBSEQUENT_BINDING_TO_43S	2.99821	0.00271572	0.0237297	2.56612	-3.6901	0.000224164	0.012163	-3.64943
REACTOME_INFLUENZA_VIRAL_RNA_TRANSCRIPTION_AND_REPLICATION	2.79653	0.00516545	0.0339858	2.28689	-3.71026	0.000207046	0.012163	-3.68393
REACTOME_TRANSLATION	2.79432	0.00520086	0.0339858	2.28392	-3.62465	0.000289353	0.012163	-3.53857
REACTOME_GENERIC_TRANSCRIPTION_PATHWAY	2.6503	0.00804211	0.0486953	2.09463	-0.342466	0.732	0.733111	-0.135489
REACTOME_SRP_DEPENDENT_COTRANSLATIONAL_PROTEIN_TARGETING_TO_MEMBRANE	2.55726	0.0105501	0.0575461	1.97674	-3.45383	0.000552695	0.012163	-3.25751
REACTOME_FORMATION_OF_THE_TERNARY_COMPLEX_AND_SUBSEQUENTLY_THE_43S_COMPLEX	2.50893	0.0121099	0.0624415	1.91686	-3.51772	0.000435267	0.012163	-3.36124
REACTOME_METABOLISM_OF_PROTEINS	2.38671	0.017	0.0801429	1.76955	-3.44489	0.000571291	0.012163	-3.24314
REACTOME_PROTEOLYTIC_CLEAVAGE_OF_SNARE_COMPLEX_PROTEINS	2.32635	0.02	0.0893624	1.69897	1.88079	0.06	0.146125	1.22185
REACTOME_IL_7_SIGNALING	2.26422	0.0235603	0.100813	1.62782	2.07485	0.038	0.12	1.42022
REACTOME_TGF_BETA_RECEPTOR_SIGNALING_IN_EMT_EPITHELIAL_TO_MESENCHYMAL_TRANSITION	2.21152	0.027	0.11	1.56864	-1.24536	0.213	0.326189	-0.67162
REACTOME_THE_NLRP3_INFLAMMASOME	2.18349	0.029	0.115301	1.5376	-0.553385	0.58	0.597192	-0.236572
REACTOME_PLATELET_AGGREGATION_PLUG_FORMATION	2.15707	0.031	0.121786	1.50864	1.91888	0.055	0.141962	1.25964
REACTOME_BOTULINUM_NEUROTOXICITY	2.10836	0.035	0.132759	1.45593	1.61644	0.106	0.208836	0.974694
REACTOME_INFLAMMASOMES	2.09693	0.036	0.134237	1.4437	1.10537	0.269	0.373585	0.570248
REACTOME_METAL_ION_SLC_TRANSPORTERS	2.06419	0.039	0.144607	1.40894	-2.56034	0.0104569	0.0539186	-1.9806
REACTOME_DEADENYLATION_OF_MRNA	1.99376	0.046178	0.163857	1.33557	-1.73354	0.083	0.17902	-1.08092
REACTOME_GRB2_SOS_PROVIDES_LINKAGE_TO_MAPK_SIGNALING_FOR_INTERGRINS_	1.96859	0.049	0.169639	1.3098	0.996515	0.319	0.418569	0.496209
REACTOME_SEMA4D_INDUCED_CELL_MIGRATION_AND_GROWTH_CONE_COLLAPSE	1.92684	0.054	0.18	1.26761	1.01313	0.311	0.412169	0.50724
REACTOME_INTEGRIN_ALPHAIIB_BETA3_SIGNALING	1.8957	0.058	0.186732	1.23657	1.80548	0.071	0.165	1.14874
REACTOME_SEMA3A_PAK_DEPENDENT_AXON_REPULSION	1.8663	0.062	0.196731	1.20761	1.88079	0.06	0.146125	1.22185
REACTOME_NCAM1_INTERACTIONS	1.85919	0.063	0.197062	1.20066	2.65207	0.008	0.0467257	2.09691
REACTOME_P130CAS_LINKAGE_TO_MAPK_SIGNALING_FOR_INTEGRINS	1.85919	0.063	0.197062	1.20066	0.815126	0.415	0.473875	0.381952
REACTOME_ZINC_TRANSPORTERS	1.82501	0.068	0.205872	1.16749	-2.03352	0.042	0.124865	-1.37675
REACTOME_PHASE1_FUNCTIONALIZATION_OF_COMPOUNDS	1.79912	0.072	0.212143	1.14267	-1.29593	0.195	0.306429	-0.709965
REACTOME_COMPLEMENT_CASCADE	1.78661	0.074	0.216106	1.13077	-1.37866	0.168	0.280709	-0.774691
REACTOME_TGF_BETA_RECEPTOR_SIGNALING_ACTIVATES_SMADS	1.77438	0.076	0.218087	1.11919	-0.87974	0.379	0.447857	-0.421361
REACTOME_NEGATIVE_REGULATORS_OF_RIG_I_MDA5_SIGNALING	1.75069	0.08	0.225641	1.09691	-1.63048	0.103	0.204759	-0.987163
REACTOME_INFLUENZA_LIFE_CYCLE	1.73354	0.083	0.232119	1.08092	-3.83978	0.000123145	0.012163	-3.90958
REACTOME_DOWNREGULATION_OF_TGF_BETA_RECEPTOR_SIGNALING	1.72793	0.084	0.232941	1.07572	-1.17	0.242	0.350263	-0.616185
REACTOME_BIOLOGICAL_OXIDATIONS	1.72793	0.084	0.232941	1.07572	-1.96652	0.0492384	0.135972	-1.3077
REACTOME_CASPASE_MEDIATED_CLEAVAGE_OF_CYTOSKELETAL_PROTEINS	1.66959	0.095	0.251807	1.02228	1.73354	0.083	0.17902	1.08092
REACTOME_SEMA4D_IN_SEMAPHORIN_SIGNALING	1.64002	0.101	0.255402	0.995679	1.16012	0.246	0.353725	0.609065
REACTOME_INTRINSIC_PATHWAY	1.62576	0.104	0.257079	0.982967	-1.27871	0.201	0.312877	-0.696804
REACTOME_REGULATION_OF_COMPLEMENT_CASCADE	1.62576	0.104	0.257079	0.982967	-1.63048	0.103	0.204759	-0.987163
REACTOME_ACTIVATED_AMPK_STIMULATES_FATTY_ACID_OXIDATION_IN_MUSCLE	1.61644	0.106	0.260074	0.974694	-0.719229	0.472	0.5192	-0.326058
REACTOME_FORMATION_OF_FIBRIN_CLOT_CLOTTING_CASCADE	1.61644	0.106	0.260074	0.974694	-1.07138	0.284	0.384098	-0.546682
REACTOME_EFFECTS_OF_PIP2_HYDROLYSIS	1.59819	0.11	0.267897	0.958607	1.64485	0.1	0.200608	1
REACTOME_METABOLISM_OF_PORPHYRINS	1.58485	0.113	0.269242	0.946922	-0.560703	0.575	0.592969	-0.240332
REACTOME_ABC_FAMILY_PROTEINS_MEDIATED_TRANSPORT	1.58485	0.113	0.269242	0.946922	-0.982203	0.326	0.420925	-0.486782
REACTOME_CELL_DEATH_SIGNALLING_VIA_NRAGE_NRIF_AND_NADE	1.58485	0.113	0.269242	0.946922	-1.16012	0.246	0.353725	-0.609065
REACTOME_STRIATED_MUSCLE_CONTRACTION	1.55477	0.12	0.279859	0.920819	-1.20294	0.229	0.338879	-0.640165
REACTOME_ENERGY_DEPENDENT_REGULATION_OF_MTOR_BY_LKB1_AMPK	1.52204	0.128	0.28861	0.89279	-1.5423	0.123	0.231282	-0.910095
REACTOME_SIGNALING_BY_TGF_BETA_RECEPTOR_COMPLEX	1.51806	0.129	0.28861	0.88941	-0.652622	0.514	0.548045	-0.289037
REACTOME_DEFENSINS	1.50626	0.132	0.2926	0.879426	1.93492	0.053	0.139363	1.27572
REACTOME_ION_CHANNEL_TRANSPORT	1.48328	0.138	0.297647	0.860121	1.51017	0.131	0.241508	0.882729
REACTOME_REGULATION_OF_AMPK_ACTIVITY_VIA_LKB1	1.46838	0.142	0.3025	0.847712	-1.55898	0.119	0.22569	-0.924453
REACTOME_N_GLYCAN_ANTENNAE_ELONGATION_IN_THE_MEDIAL_TRANS_GOLGI	1.46471	0.143	0.3025	0.844664	1.95148	0.051	0.136829	1.29243
REACTOME_APOPTOTIC_CLEAVAGE_OF_CELLULAR_PROTEINS	1.46471	0.143	0.3025	0.844664	1.66456	0.096	0.19677	1.01773
REACTOME_ION_TRANSPORT_BY_P_TYPE_ATPASES	1.46471	0.143	0.3025	0.844664	1.64485	0.1	0.200608	1
REACTOME_HDL_MEDIATED_LIPID_TRANSPORT	1.45381	0.146	0.303975	0.835647	-1.70604	0.088	0.184968	-1.05552
REACTOME_SIGNALING_BY_NODAL	1.43953	0.15	0.307453	0.823909	1.00895	0.313	0.412335	0.504456
REACTOME_IRON_UPTAKE_AND_TRANSPORT	1.43953	0.15	0.307453	0.823909	-1.56322	0.118	0.225087	-0.928118
REACTOME_INTEGRIN_CELL_SURFACE_INTERACTIONS	1.4325	0.152	0.310588	0.818156	2.45726	0.014	0.0650704	1.85387
REACTOME_N_GLYCAN_ANTENNAE_ELONGATION	1.42554	0.154	0.312738	0.812479	1.55059	0.121	0.228825	0.917215
REACTOME_RIG_I_MDA5_MEDIATED_INDUCTION_OF_IFN_ALPHA_BETA_PATHWAYS	1.41865	0.156	0.313902	0.806875	-1.03002	0.303	0.404	-0.518557
REACTOME_SIGNALING_BY_BMP	1.39505	0.163	0.319228	0.787812	1.4325	0.152	0.265397	0.818156
REACTOME_BASIGIN_INTERACTIONS	1.38845	0.165	0.319355	0.782516	-0.887147	0.375	0.44553	-0.425969
REACTOME_TIGHT_JUNCTION_INTERACTIONS	1.38517	0.166	0.319417	0.779892	0.972102	0.331	0.420925	0.480172
REACTOME_UNBLOCKING_OF_NMDA_RECEPTOR_GLUTAMATE_BINDING_AND_ACTIVATION	1.34076	0.18	0.334648	0.744727	1.369	0.171	0.283568	0.767004
REACTOME_ORGANIC_CATION_ANION_ZWITTERION_TRANSPORT	1.32854	0.184	0.339218	0.735182	-0.816875	0.414	0.473875	-0.383
REACTOME_TRANSPORT_OF_INORGANIC_CATIONS_ANIONS_AND_AMINO_ACIDS_OLIGOPEPTIDES	1.32251	0.186	0.341	0.730487	-1.06032	0.289	0.388473	-0.539102
REACTOME_TRYPTOPHAN_CATABOLISM	1.31652	0.188	0.342762	0.725842	0.938476	0.348	0.434664	0.458421
REACTOME_TRANSPORT_TO_THE_GOLGI_AND_SUBSEQUENT_MODIFICATION	1.31354	0.189	0.343636	0.723538	1.68494	0.092	0.191546	1.03621
REACTOME_ASSOCIATION_OF_TRIC_CCT_WITH_TARGET_PROTEINS_DURING_BIOSYNTHESIS	1.30469	0.192	0.34623	0.716699	-2.60414	0.00921053	0.0499362	-2.03572
REACTOME_PI3K_CASCADE	1.29884	0.194	0.347935	0.712198	-0.493018	0.622	0.634498	-0.20621
REACTOME_PKB_MEDIATED_EVENTS	1.28727	0.198	0.35129	0.703335	-2.43026	0.0150878	0.0682052	-1.82137
REACTOME_GLUTAMATE_NEUROTRANSMITTER_RELEASE_CYCLE	1.27305	0.203	0.354063	0.692504	-0.730638	0.465	0.512354	-0.332547
REACTOME_RORA_ACTIVATES_CIRCADIAN_EXPRESSION	1.27024	0.204	0.354063	0.69037	2.57583	0.01	0.0528	2
REACTOME_TRAFFICKING_OF_AMPA_RECEPTORS	1.26464	0.206	0.354063	0.686133	1.64972	0.099	0.199817	1.00436
REACTOME_ACYL_CHAIN_REMODELLING_OF_PI	1.26464	0.206	0.354063	0.686133	0.825655	0.409	0.470279	0.388277
REACTOME_INITIAL_TRIGGERING_OF_COMPLEMENT	1.24264	0.214	0.361069	0.669586	0.97613	0.329	0.420925	0.482804
REACTOME_DEGRADATION_OF_THE_EXTRACELLULAR_MATRIX	1.23454	0.217	0.362582	0.66354	2.43238	0.015	0.0682052	1.82391
REACTOME_TRANSCRIPTIONAL_ACTIVITY_OF_SMAD2_SMAD3_SMAD4_HETEROTRIMER	1.23454	0.217	0.362582	0.66354	-0.834499	0.404	0.467789	-0.393619
REACTOME_NFKB_IS_ACTIVATED_AND_SIGNALS_SURVIVAL	1.22919	0.219	0.363166	0.659556	-1.92684	0.054	0.14087	-1.26761
REACTOME_GLUTATHIONE_CONJUGATION	1.21596	0.224	0.3696	0.649752	-1.47579	0.14	0.253151	-0.853872
REACTOME_IL_RECEPTOR_SHC_SIGNALING	1.21073	0.226	0.371045	0.645892	2.54971	0.0107813	0.0551603	1.96733
REACTOME_CIRCADIAN_REPRESSION_OF_EXPRESSION_BY_REV_ERBA	1.20812	0.227	0.371351	0.643974	2.38671	0.017	0.0738158	1.76955
REACTOME_CIRCADIAN_CLOCK	1.20294	0.229	0.371351	0.640165	1.49085	0.136	0.247956	0.866461
REACTOME_CELL_SURFACE_INTERACTIONS_AT_THE_VASCULAR_WALL	1.20294	0.229	0.371351	0.640165	-0.442676	0.658	0.663023	-0.181774
REACTOME_FGFR_LIGAND_BINDING_AND_ACTIVATION	1.19012	0.234	0.374638	0.630784	1.07138	0.284	0.384098	0.546682
REACTOME_P75_NTR_RECEPTOR_MEDIATED_SIGNALLING	1.18758	0.235	0.374638	0.628932	-1.39505	0.163	0.274439	-0.787812
REACTOME_NFKB_ACTIVATION_THROUGH_FADD_RIP1_PATHWAY_MEDIATED_BY_CASPASE_8_AND10	1.18504	0.236	0.375325	0.627088	0.802956	0.422	0.480207	0.374688
REACTOME_P75NTR_SIGNALS_VIA_NFKB	1.18252	0.237	0.375789	0.625252	-2.05375	0.04	0.122222	-1.39794
REACTOME_ACETYLCHOLINE_NEUROTRANSMITTER_RELEASE_CYCLE	1.18	0.238	0.375789	0.623423	1.91888	0.055	0.141962	1.25964
REACTOME_NUCLEAR_SIGNALING_BY_ERBB4	1.17249	0.241	0.379618	0.617983	-0.485954	0.627	0.637627	-0.202732
REACTOME_RESPONSE_TO_ELEVATED_PLATELET_CYTOSOLIC_CA2_	1.15767	0.247	0.380888	0.607303	2.6943	0.00705367	0.0419407	2.15158
REACTOME_SHC_MEDIATED_CASCADE	1.15767	0.247	0.380888	0.607303	1.09847	0.272	0.373817	0.565431
REACTOME_GAP_JUNCTION_DEGRADATION	1.15278	0.249	0.383077	0.603801	1.38845	0.165	0.276396	0.782516
REACTOME_TRANSPORT_OF_VITAMINS_NUCLEOSIDES_AND_RELATED_MOLECULES	1.15035	0.25	0.383721	0.60206	-0.905879	0.365	0.439599	-0.437707
REACTOME_IKK_COMPLEX_RECRUITMENT_MEDIATED_BY_RIP1	1.1359	0.256	0.388767	0.59176	-0.629533	0.529	0.556842	-0.276544
REACTOME_DOWNREGULATION_OF_SMAD2_3_SMAD4_TRANSCRIPTIONAL_ACTIVITY	1.13351	0.257	0.388767	0.590067	-1.13351	0.257	0.36556	-0.590067
REACTOME_NRAGE_SIGNALS_DEATH_THROUGH_JNK	1.13113	0.258	0.388767	0.58838	2.22621	0.026	0.0948066	1.58503
REACTOME_RNA_POL_I_PROMOTER_OPENING	1.13113	0.258	0.388767	0.58838	-0.606775	0.544	0.569905	-0.264401
REACTOME_P75NTR_RECRUITS_SIGNALLING_COMPLEXES	1.12168	0.262	0.391222	0.581699	-1.85218	0.064	0.1536	-1.19382
REACTOME_ABCA_TRANSPORTERS_IN_LIPID_HOMEOSTASIS	1.11465	0.265	0.394808	0.576754	0.88529	0.376	0.44553	0.424812
REACTOME_RIP_MEDIATED_NFKB_ACTIVATION_VIA_DAI	1.11	0.267	0.395705	0.573489	1.09618	0.273	0.373817	0.563837
REACTOME_IL_6_SIGNALING	1.10768	0.268	0.395705	0.571865	2.17009	0.03	0.104211	1.52288
REACTOME_BRANCHED_CHAIN_AMINO_ACID_CATABOLISM	1.09618	0.273	0.399205	0.563837	-1.34694	0.178	0.291514	-0.74958
REACTOME_PHASE_II_CONJUGATION	1.0939	0.274	0.399205	0.562249	-1.62108	0.105	0.207485	-0.978811
REACTOME_PROCESSING_OF_INTRONLESS_PRE_MRNAS	1.0939	0.274	0.399205	0.562249	-1.78046	0.075	0.17069	-1.12494
REACTOME_DCC_MEDIATED_ATTRACTIVE_SIGNALING	1.08257	0.279	0.401176	0.554396	-0.565108	0.572	0.591724	-0.242604
REACTOME_REGULATION_OF_RHEB_GTPASE_ACTIVITY_BY_AMPK	1.08257	0.279	0.401176	0.554396	-0.834499	0.404	0.467789	-0.393619
REACTOME_FACILITATIVE_NA_INDEPENDENT_GLUCOSE_TRANSPORTERS	1.08257	0.279	0.401176	0.554396	-1.07584	0.282	0.382963	-0.549751
REACTOME_ACTIVATION_OF_CHAPERONE_GENES_BY_ATF6_ALPHA	1.06915	0.285	0.404968	0.545155	1.10768	0.268	0.373585	0.571865
REACTOME_CHEMOKINE_RECEPTORS_BIND_CHEMOKINES	1.06473	0.287	0.404968	0.542118	-0.760426	0.447	0.502804	-0.349692
REACTOME_ROLE_OF_DCC_IN_REGULATING_APOPTOSIS	1.06252	0.288	0.404968	0.540608	0.852386	0.394	0.461064	0.404504
REACTOME_OLFACTORY_SIGNALING_PATHWAY	1.06252	0.288	0.404968	0.540608	-2.64443	0.00818276	0.0473739	-2.0871
REACTOME_SEMA3A_PLEXIN_REPULSION_SIGNALING_BY_INHIBITING_INTEGRIN_ADHESION	1.06032	0.289	0.404968	0.539102	2.6152	0.00891752	0.0499362	2.04976
REACTOME_O_LINKED_GLYCOSYLATION_OF_MUCINS	1.05593	0.291	0.40519	0.536107	1.56322	0.118	0.225087	0.928118
REACTOME_PROLACTIN_RECEPTOR_SIGNALING	1.05593	0.291	0.40519	0.536107	-0.829185	0.407	0.469615	-0.390406
REACTOME_CYTOCHROME_P450_ARRANGED_BY_SUBSTRATE_TYPE	1.05593	0.291	0.40519	0.536107	-1.68494	0.092	0.191546	-1.03621
REACTOME_NUCLEOTIDE_BINDING_DOMAIN_LEUCINE_RICH_REPEAT_CONTAINING_RECEPTOR_NLR_SIGNALING_PATHWAYS	1.05374	0.292	0.405726	0.534617	-0.476104	0.634	0.639817	-0.197911
REACTOME_CLASS_C_3_METABOTROPIC_GLUTAMATE_PHEROMONE_RECEPTORS	1.04939	0.294	0.407322	0.531653	1.4325	0.152	0.265397	0.818156
REACTOME_ACTIVATION_OF_CHAPERONES_BY_ATF6_ALPHA	1.04722	0.295	0.407322	0.530178	-0.757083	0.449	0.502804	-0.347754
REACTOME_ABACAVIR_TRANSPORT_AND_METABOLISM	1.03002	0.303	0.414896	0.518557	0.743796	0.457	0.507778	0.340084
REACTOME_CGMP_EFFECTS	1.02365	0.306	0.416	0.514279	-0.578391	0.563	0.586088	-0.249492
REACTOME_NRIF_SIGNALS_CELL_DEATH_FROM_THE_NUCLEUS	1.02365	0.306	0.416	0.514279	-1.03215	0.302	0.403482	-0.519993
REACTOME_PI3K_AKT_ACTIVATION	1.01732	0.309	0.416	0.510042	2.36562	0.018	0.0756688	1.74473
REACTOME_GABA_SYNTHESIS_RELEASE_REUPTAKE_AND_DEGRADATION	1.01732	0.309	0.416	0.510042	1.11	0.267	0.373585	0.573489
REACTOME_REGULATION_OF_IFNA_SIGNALING	1.01103	0.312	0.416	0.505845	2.02555	0.0428112	0.126133	1.36844
REACTOME_N_GLYCAN_TRIMMING_IN_THE_ER_AND_CALNEXIN_CALRETICULIN_CYCLE	1.00686	0.314	0.416982	0.50307	1.21859	0.223	0.333725	0.651695
REACTOME_EXTRINSIC_PATHWAY_FOR_APOPTOSIS	0.982203	0.326	0.428606	0.486782	-1.56322	0.118	0.225087	-0.928118
REACTOME_SMAD2_SMAD3_SMAD4_HETEROTRIMER_REGULATES_TRANSCRIPTION	0.974114	0.33	0.429708	0.481486	-0.909663	0.363	0.439599	-0.440093
REACTOME_ACTIVATION_OF_IRF3_IRF7_MEDIATED_BY_TBK1_IKK_EPSILON	0.970093	0.332	0.429708	0.478862	-1.75652	0.079	0.174381	-1.10237
REACTOME_COMMON_PATHWAY	0.968089	0.333	0.429708	0.477556	-0.644888	0.519	0.550707	-0.284833
REACTOME_ERKS_ARE_INACTIVATED	0.966088	0.334	0.429708	0.476254	1.90331	0.057	0.141962	1.24413
REACTOME_SIGNALING_BY_FGFR1_MUTANTS	0.962099	0.336	0.430602	0.473661	1.95996	0.05	0.136364	1.30103
REACTOME_VEGF_LIGAND_RECEPTOR_INTERACTIONS	0.948254	0.343	0.437027	0.464706	1.4325	0.152	0.265397	0.818156
REACTOME_PACKAGING_OF_TELOMERE_ENDS	0.946291	0.344	0.437457	0.463442	0.905879	0.365	0.439599	0.437707
REACTOME_RECYCLING_OF_BILE_ACIDS_AND_SALTS	0.930717	0.352	0.445057	0.453457	-0.900226	0.368	0.4416	-0.434152
REACTOME_INSULIN_SYNTHESIS_AND_PROCESSING	0.923014	0.356	0.446692	0.44855	-2.01146	0.0442772	0.128019	-1.35382
REACTOME_AMINE_DERIVED_HORMONES	0.898348	0.369	0.455215	0.432974	-1.45742	0.145	0.257258	-0.838632
REACTOME_SIGNALING_BY_FGFR1_FUSION_MUTANTS	0.896473	0.37	0.455597	0.431798	1.65463	0.098	0.199015	1.00877
REACTOME_ACYL_CHAIN_REMODELLING_OF_PE	0.892733	0.372	0.457207	0.429457	1.34076	0.18	0.293333	0.744727
REACTOME_MTORC1_MEDIATED_SIGNALLING	0.88529	0.376	0.459556	0.424812	-2.46666	0.0136378	0.064755	-1.86526
REACTOME_GAMMA_CARBOXYLATION_TRANSPORT_AND_AMINO_TERMINAL_CLEAVAGE_OF_PROTEINS	0.881587	0.378	0.461146	0.422508	2.25713	0.024	0.09	1.61979
REACTOME_IRAK2_MEDIATED_ACTIVATION_OF_TAK1_COMPLEX_UPON_TLR7_8_OR_9_STIMULATION	0.87974	0.379	0.461513	0.421361	-0.690309	0.49	0.534545	-0.309804
REACTOME_PASSIVE_TRANSPORT_BY_AQUAPORINS	0.876055	0.381	0.462243	0.419075	-0.815126	0.415	0.473875	-0.381952
REACTOME_AKT_PHOSPHORYLATES_TARGETS_IN_THE_CYTOSOL	0.868721	0.385	0.465385	0.414539	0.980174	0.327	0.420925	0.485452
REACTOME_TIE2_SIGNALING	0.850585	0.395	0.472283	0.403403	1.42554	0.154	0.266073	0.812479
REACTOME_SIGNAL_REGULATORY_PROTEIN_SIRP_FAMILY_INTERACTIONS	0.850585	0.395	0.472283	0.403403	-0.850585	0.395	0.461416	-0.403403
REACTOME_REGULATED_PROTEOLYSIS_OF_P75NTR	0.834499	0.404	0.479568	0.393619	-0.660396	0.509	0.546244	-0.293282
REACTOME_FORMATION_OF_ATP_BY_CHEMIOSMOTIC_COUPLING	0.830953	0.406	0.480857	0.391474	-1.63523	0.102	0.204	-0.9914
REACTOME_TRAFFICKING_AND_PROCESSING_OF_ENDOSOMAL_TLR	0.827418	0.408	0.480857	0.38934	-0.930717	0.352	0.434664	-0.453457
REACTOME_PD1_SIGNALING	0.820379	0.412	0.483843	0.385103	0.898348	0.369	0.441996	0.432974
REACTOME_DOWNREGULATION_OF_ERBB2_ERBB3_SIGNALING	0.816875	0.414	0.483922	0.383	-1.41865	0.156	0.267429	-0.806875
REACTOME_SIGNALING_BY_FGFR3_MUTANTS	0.808157	0.419	0.486866	0.377786	1.95996	0.05	0.136364	1.30103
REACTOME_XENOBIOTICS	0.695088	0.487	0.542024	0.312471	0.737201	0.461	0.510503	0.336299
REACTOME_METABOLISM_OF_MRNA	-0.280622	0.779	0.779	-0.108463	-3.73591	0.000187038	0.012163	-3.72807
REACTOME_INNATE_IMMUNE_SYSTEM	-0.281926	0.778	0.779	-0.10902	1.34694	0.178	0.291514	0.74958
REACTOME_ASPARAGINE_N_LINKED_GLYCOSYLATION	-0.337155	0.736	0.738237	-0.133122	1.51806	0.129	0.239157	0.88941
REACTOME_NCAM_SIGNALING_FOR_NEURITE_OUT_GROWTH	-0.382622	0.702	0.705205	-0.153663	1.75652	0.079	0.174381	1.10237
REACTOME_TRANSPORT_OF_GLUCOSE_AND_OTHER_SUGARS_BILE_SALTS_AND_ORGANIC_ACIDS_METAL_IONS_AND_AMINE_COMPOUNDS	-0.424776	0.671	0.675091	-0.173277	-2.06306	0.0391065	0.121747	-1.40775
REACTOME_PI_3K_CASCADE	-0.437154	0.662	0.667053	-0.179142	2.01473	0.0439327	0.127734	1.35721
REACTOME_INSULIN_RECEPTOR_SIGNALLING_CASCADE	-0.448212	0.654	0.66	-0.184422	-0.652622	0.514	0.548045	-0.289037
REACTOME_PI_METABOLISM	-0.450985	0.652	0.658989	-0.185752	-0.51293	0.608	0.621176	-0.216096
REACTOME_RNA_POL_I_TRANSCRIPTION	-0.453762	0.65	0.657975	-0.187087	-1.90331	0.057	0.141962	-1.24413
REACTOME_SIGNALING_BY_INSULIN_RECEPTOR	-0.459326	0.646	0.654931	-0.189767	1.19012	0.234	0.343142	0.630784
REACTOME_BMAL1_CLOCK_NPAS2_ACTIVATES_CIRCADIAN_EXPRESSION	-0.462113	0.644	0.653908	-0.191114	1.47208	0.141	0.254262	0.850781
REACTOME_RNA_POL_I_TRANSCRIPTION_TERMINATION	-0.490189	0.624	0.634576	-0.204815	-2.89816	0.00375364	0.0302122	-2.42555
REACTOME_PI3K_EVENTS_IN_ERBB2_SIGNALING	-0.491603	0.623	0.634537	-0.205512	2.06697	0.0387367	0.121744	1.41188
REACTOME_METABOLISM_OF_VITAMINS_AND_COFACTORS	-0.494434	0.621	0.633478	-0.206908	-2.28356	0.0223973	0.0864457	-1.6498
REACTOME_INTERFERON_ALPHA_BETA_SIGNALING	-0.49585	0.62	0.633437	-0.207608	2.34553	0.019	0.0778882	1.72125
REACTOME_G_ALPHA1213_SIGNALLING_EVENTS	-0.507221	0.612	0.626233	-0.213249	2.45726	0.014	0.0650704	1.85387
REACTOME_GPVI_MEDIATED_ACTIVATION_CASCADE	-0.510073	0.61	0.625155	-0.21467	1.88819	0.059	0.145299	1.22915
REACTOME_SIGNALING_BY_RHO_GTPASES	-0.51293	0.608	0.624075	-0.216096	2.41744	0.0156299	0.0697011	1.80604
REACTOME_CELL_CELL_JUNCTION_ORGANIZATION	-0.518657	0.604	0.620935	-0.218963	2.5427	0.011	0.0554198	1.95861
REACTOME_TCR_SIGNALING	-0.522963	0.601	0.618814	-0.221126	1.72793	0.084	0.179417	1.07572
REACTOME_PI3K_EVENTS_IN_ERBB4_SIGNALING	-0.524401	0.6	0.61875	-0.221849	2.22621	0.026	0.0948066	1.58503
REACTOME_SLC_MEDIATED_TRANSMEMBRANE_TRANSPORT	-0.525839	0.599	0.618685	-0.222573	-2.7409	0.0061271	0.0387206	-2.21275
REACTOME_LATENT_INFECTION_OF_HOMO_SAPIENS_WITH_MYCOBACTERIUM_TUBERCULOSIS	-0.531604	0.595	0.615517	-0.225483	1.80548	0.071	0.165	1.14874
REACTOME_APOPTOTIC_EXECUTION_PHASE	-0.534494	0.593	0.614411	-0.226945	1.70604	0.088	0.184968	1.05552
REACTOME_SIGNALING_BY_HIPPO	-0.534494	0.593	0.614411	-0.226945	-1.17499	0.24	0.349582	-0.619789
REACTOME_NEUROTRANSMITTER_RELEASE_CYCLE	-0.537387	0.591	0.614268	-0.228413	-0.905879	0.365	0.439599	-0.437707
REACTOME_SYNTHESIS_OF_PC	-0.538836	0.59	0.614196	-0.229148	-1.21596	0.224	0.333725	-0.649752
REACTOME_TRAF3_DEPENDENT_IRF_ACTIVATION_PATHWAY	-0.540286	0.589	0.614123	-0.229885	1.01313	0.311	0.412169	0.50724
REACTOME_AMYLOIDS	-0.541737	0.588	0.614051	-0.230623	1.84526	0.065	0.155435	1.18709
REACTOME_MRNA_3_END_PROCESSING	-0.543189	0.587	0.613978	-0.231362	-2.18001	0.0292568	0.103814	-1.53377
REACTOME_PLATELET_ACTIVATION_SIGNALING_AND_AGGREGATION	-0.551925	0.581	0.608667	-0.235824	2.58942	0.00961387	0.0511706	2.0171
REACTOME_PLATELET_CALCIUM_HOMEOSTASIS	-0.553385	0.58	0.608585	-0.236572	2.17009	0.03	0.104211	1.52288
REACTOME_MITOCHONDRIAL_TRNA_AMINOACYLATION	-0.553385	0.58	0.608585	-0.236572	-3.07403	0.00211187	0.0240529	-2.67533
REACTOME_SYNTHESIS_OF_PIPS_AT_THE_PLASMA_MEMBRANE	-0.557772	0.577	0.607368	-0.238824	-0.608283	0.543	0.569762	-0.2652
REACTOME_NITRIC_OXIDE_STIMULATES_GUANYLATE_CYCLASE	-0.565108	0.572	0.603067	-0.242604	-0.635657	0.525	0.5544	-0.279841
REACTOME_RNA_POL_I_RNA_POL_III_AND_MITOCHONDRIAL_TRANSCRIPTION	-0.569525	0.569	0.600864	-0.244888	-2.86191	0.00421098	0.0323169	-2.37562
REACTOME_IL_3_5_AND_GM_CSF_SIGNALING	-0.570999	0.568	0.600769	-0.245652	2.18307	0.0290307	0.103569	1.53714
REACTOME_POST_TRANSLATIONAL_PROTEIN_MODIFICATION	-0.573952	0.566	0.599615	-0.247184	1.53007	0.126	0.23625	0.899629
REACTOME_OXYGEN_DEPENDENT_PROLINE_HYDROXYLATION_OF_HYPOXIA_INDUCIBLE_FACTOR_ALPHA	-0.575431	0.565	0.599518	-0.247952	-0.934589	0.35	0.434664	-0.455932
REACTOME_CELL_CELL_COMMUNICATION	-0.578391	0.563	0.598357	-0.249492	2.87816	0.004	0.0310588	2.39794
REACTOME_COPI_MEDIATED_TRANSPORT	-0.579873	0.562	0.598258	-0.250264	-1.42901	0.153	0.265737	-0.815309
REACTOME_APOPTOTIC_CLEAVAGE_OF_CELL_ADHESION_PROTEINS	-0.584327	0.559	0.596026	-0.252588	2.19336	0.0282813	0.101444	1.5485
REACTOME_SEMAPHORIN_INTERACTIONS	-0.587303	0.557	0.594854	-0.254145	1.7392	0.082	0.178614	1.08619
REACTOME_CALNEXIN_CALRETICULIN_CYCLE	-0.590284	0.555	0.593679	-0.255707	0.900226	0.368	0.4416	0.434152
REACTOME_PURINE_RIBONUCLEOSIDE_MONOPHOSPHATE_BIOSYNTHESIS	-0.59776	0.55	0.589286	-0.259637	-2.92541	0.00344006	0.0286248	-2.46343
REACTOME_NUCLEAR_RECEPTOR_TRANSCRIPTION_PATHWAY	-0.608283	0.543	0.582732	-0.2652	1.39174	0.164	0.27542	0.785156
REACTOME_GAB1_SIGNALOSOME	-0.612813	0.54	0.580456	-0.267606	2.2663	0.0234331	0.0886775	1.63017
REACTOME_FGFR4_LIGAND_BINDING_AND_ACTIVATION	-0.612813	0.54	0.580456	-0.267606	1.22123	0.222	0.333725	0.653647
REACTOME_FGFR1_LIGAND_BINDING_AND_ACTIVATION	-0.61584	0.538	0.580196	-0.269218	2.29037	0.022	0.0854118	1.65758
REACTOME_TRANSFERRIN_ENDOCYTOSIS_AND_RECYCLING	-0.621912	0.534	0.576825	-0.272459	1.42209	0.155	0.267102	0.809668
REACTOME_GOLGI_ASSOCIATED_VESICLE_BIOGENESIS	-0.621912	0.534	0.576825	-0.272459	-2.47386	0.0133663	0.0639257	-1.87399
REACTOME_EXTRACELLULAR_MATRIX_ORGANIZATION	-0.62648	0.531	0.575468	-0.274905	2.04683	0.0406746	0.123562	1.39068
REACTOME_NEPHRIN_INTERACTIONS	-0.628006	0.53	0.575329	-0.275724	2.08576	0.037	0.117971	1.4318
REACTOME_SYNTHESIS_OF_PIPS_AT_THE_LATE_ENDOSOME_MEMBRANE	-0.631062	0.528	0.574102	-0.277366	1.72793	0.084	0.179417	1.07572
REACTOME_TRAF6_MEDIATED_NFKB_ACTIVATION	-0.632592	0.527	0.57396	-0.278189	0.846991	0.397	0.462116	0.401209
REACTOME_CD28_DEPENDENT_VAV1_PATHWAY	-0.638728	0.523	0.570545	-0.281498	1.95148	0.051	0.136829	1.29243
REACTOME_GENERATION_OF_SECOND_MESSENGER_MOLECULES	-0.643345	0.52	0.568212	-0.283997	-0.654174	0.513	0.548045	-0.289883
REACTOME_RESPIRATORY_ELECTRON_TRANSPORT_ATP_SYNTHESIS_BY_CHEMIOSMOTIC_COUPLING_AND_HEAT_PRODUCTION_BY_UNCOUPLING_PROTEINS_	-0.646431	0.518	0.566965	-0.28567	-3.10287	0.00191653	0.0234242	-2.71749
REACTOME_IL_2_SIGNALING	-0.651072	0.515	0.564618	-0.288193	2.29037	0.022	0.0854118	1.65758
REACTOME_SIGNAL_ATTENUATION	-0.651072	0.515	0.564618	-0.288193	1.28441	0.199	0.310496	0.701147
REACTOME_SYNTHESIS_OF_PIPS_AT_THE_GOLGI_MEMBRANE	-0.652622	0.514	0.564618	-0.289037	-1.48328	0.138	0.250909	-0.860121
REACTOME_PURINE_SALVAGE	-0.654174	0.513	0.564618	-0.289883	-2.37741	0.0174347	0.0747202	-1.75859
REACTOME_REGULATION_OF_HYPOXIA_INDUCIBLE_FACTOR_HIF_BY_OXYGEN	-0.669777	0.503	0.555151	-0.298432	-1.14551	0.252	0.360781	-0.598599
REACTOME_PIP3_ACTIVATES_AKT_SIGNALING	-0.67764	0.498	0.550553	-0.302771	1.90331	0.057	0.141962	1.24413
REACTOME_TRANS_GOLGI_NETWORK_VESICLE_BUDDING	-0.67764	0.498	0.550553	-0.302771	-1.88819	0.059	0.145299	-1.22915
REACTOME_RESPIRATORY_ELECTRON_TRANSPORT	-0.67764	0.498	0.550553	-0.302771	-2.94808	0.00319758	0.0286248	-2.49518
REACTOME_REGULATION_OF_INSULIN_LIKE_GROWTH_FACTOR_IGF_ACTIVITY_BY_INSULIN_LIKE_GROWTH_FACTOR_BINDING_PROTEINS_IGFBPS	-0.680797	0.496	0.550553	-0.304518	0.972102	0.331	0.420925	0.480172
REACTOME_TRANSPORT_OF_ORGANIC_ANIONS	-0.696685	0.486	0.541824	-0.313364	-0.67449	0.5	0.538336	-0.30103
REACTOME_DOWNSTREAM_TCR_SIGNALING	-0.701486	0.483	0.539391	-0.316053	1.78661	0.074	0.170174	1.13077
REACTOME_BILE_SALT_AND_ORGANIC_ANION_SLC_TRANSPORTERS	-0.704695	0.481	0.538068	-0.317855	-1.76241	0.078	0.174381	-1.10791
REACTOME_ANTIGEN_PRESENTATION_FOLDING_ASSEMBLY_AND_PEPTIDE_LOADING_OF_CLASS_I_MHC	-0.707912	0.479	0.53674	-0.319664	1.50626	0.132	0.242	0.879426
REACTOME_PEPTIDE_LIGAND_BINDING_RECEPTORS	-0.714367	0.475	0.533163	-0.323306	-0.394787	0.693	0.696164	-0.159267
REACTOME_LIGAND_GATED_ION_CHANNEL_TRANSPORT	-0.719229	0.472	0.530698	-0.326058	-0.794336	0.427	0.484227	-0.369572
REACTOME_TRANSMEMBRANE_TRANSPORT_OF_SMALL_MOLECULES	-0.720853	0.471	0.530478	-0.326979	-2.39394	0.0166684	0.0733408	-1.77811
REACTOME_TRNA_AMINOACYLATION	-0.722479	0.47	0.530256	-0.327902	-3.41685	0.000633504	0.013066	-3.19825
REACTOME_DEADENYLATION_DEPENDENT_MRNA_DECAY	-0.730638	0.465	0.525514	-0.332547	-2.78611	0.00533444	0.0360752	-2.27291
REACTOME_VITAMIN_B5_PANTOTHENATE_METABOLISM	-0.740494	0.459	0.519623	-0.338187	-1.23723	0.216	0.327724	-0.665546
REACTOME_SIGNALING_BY_ACTIVATED_POINT_MUTANTS_OF_FGFR1	-0.74545	0.456	0.517113	-0.341035	2.39878	0.0164496	0.0728642	1.78384
REACTOME_TRAF6_MEDIATED_IRF7_ACTIVATION	-0.74545	0.456	0.517113	-0.341035	1.45381	0.146	0.258338	0.835647
REACTOME_SPHINGOLIPID_DE_NOVO_BIOSYNTHESIS	-0.760426	0.447	0.508655	-0.349692	0.968089	0.333	0.421843	0.477556
REACTOME_CELL_JUNCTION_ORGANIZATION	-0.765456	0.444	0.506114	-0.352617	2.87816	0.004	0.0310588	2.39794
REACTOME_ENDOSOMAL_VACUOLAR_PATHWAY	-0.765456	0.444	0.506114	-0.352617	1.35005	0.177	0.291514	0.752027
REACTOME_METABOLISM_OF_POLYAMINES	-0.765456	0.444	0.506114	-0.352617	-1.99215	0.0463547	0.130597	-1.33391
REACTOME_GLYCOLYSIS	-0.767137	0.443	0.506114	-0.353596	-2.05424	0.0399523	0.122222	-1.39846
REACTOME_P2Y_RECEPTORS	-0.770506	0.441	0.506114	-0.355561	0.954165	0.34	0.429063	0.468521
REACTOME_RETROGRADE_NEUROTROPHIN_SIGNALLING	-0.773883	0.439	0.504774	-0.357535	1.24264	0.214	0.326189	0.669586
REACTOME_SIGNALING_BY_ERBB4	-0.789192	0.43	0.495288	-0.366532	1.82501	0.068	0.160286	1.16749
REACTOME_TRAF6_MEDIATED_INDUCTION_OF_TAK1_COMPLEX	-0.789192	0.43	0.495288	-0.366532	-0.67764	0.498	0.537059	-0.302771
REACTOME_GROWTH_HORMONE_RECEPTOR_SIGNALING	-0.794336	0.427	0.493555	-0.369572	0.915365	0.36	0.438376	0.443697
REACTOME_GABA_A_RECEPTOR_ACTIVATION	-0.799501	0.424	0.490947	-0.372634	-1.04939	0.294	0.39439	-0.531653
REACTOME_CHONDROITIN_SULFATE_BIOSYNTHESIS	-0.801227	0.423	0.49065	-0.37366	1.46106	0.144	0.256865	0.841638
REACTOME_COSTIMULATION_BY_THE_CD28_FAMILY	-0.811637	0.417	0.485397	-0.379864	1.97737	0.048	0.133109	1.31876
REACTOME_ACYL_CHAIN_REMODELLING_OF_PC	-0.815126	0.415	0.483922	-0.381952	2.08576	0.037	0.117971	1.4318
REACTOME_CYTOSOLIC_TRNA_AMINOACYLATION	-0.815126	0.415	0.483922	-0.381952	-3.00863	0.00262428	0.0270726	-2.58099
REACTOME_MITOCHONDRIAL_PROTEIN_IMPORT	-0.816875	0.414	0.483922	-0.383	-3.34024	0.000837063	0.0145385	-3.07724
REACTOME_PLATELET_SENSITIZATION_BY_LDL	-0.825655	0.409	0.481176	-0.388277	-0.755415	0.45	0.502804	-0.346787
REACTOME_SYNTHESIS_OF_PIPS_AT_THE_EARLY_ENDOSOME_MEMBRANE	-0.827418	0.408	0.480857	-0.38934	-0.892733	0.372	0.443978	-0.429457
REACTOME_SIGNALING_BY_PDGF	-0.829185	0.407	0.480857	-0.390406	2.72578	0.00641492	0.0395687	2.19281
REACTOME_NUCLEAR_EVENTS_KINASE_AND_TRANSCRIPTION_FACTOR_ACTIVATION	-0.845199	0.398	0.473297	-0.400117	1.46471	0.143	0.255772	0.844664
REACTOME_COLLAGEN_FORMATION	-0.846991	0.397	0.47296	-0.401209	2.00465	0.045	0.128019	1.34679
REACTOME_EGFR_DOWNREGULATION	-0.848787	0.396	0.472622	-0.402305	1.6027	0.109	0.213472	0.962574
REACTOME_CD28_DEPENDENT_PI3K_AKT_SIGNALING	-0.850585	0.395	0.472283	-0.403403	1.99539	0.046	0.1303	1.33724
REACTOME_REGULATION_OF_PYRUVATE_DEHYDROGENASE_PDH_COMPLEX	-0.852386	0.394	0.472283	-0.404504	-1.82501	0.068	0.160286	-1.16749
REACTOME_CD28_CO_STIMULATION	-0.855996	0.392	0.472117	-0.406714	2.12007	0.034	0.1126	1.46852
REACTOME_DSCAM_INTERACTIONS	-0.859617	0.39	0.470567	-0.408935	-0.682378	0.495	0.537059	-0.305395
REACTOME_TRANSCRIPTIONAL_REGULATION_OF_WHITE_ADIPOCYTE_DIFFERENTIATION	-0.874217	0.382	0.462606	-0.417937	1.41865	0.156	0.267429	0.806875
REACTOME_INTERACTION_BETWEEN_L1_AND_ANKYRINS	-0.877896	0.38	0.461878	-0.420216	-0.644888	0.519	0.550707	-0.284833
REACTOME_ACTIVATED_TAK1_MEDIATES_P38_MAPK_ACTIVATION	-0.88529	0.376	0.459556	-0.424812	-0.90777	0.364	0.439599	-0.438899
REACTOME_RNA_POL_I_TRANSCRIPTION_INITIATION	-0.890868	0.373	0.457584	-0.428291	-3.22974	0.00123903	0.0177774	-2.90692
REACTOME_IL1_SIGNALING	-0.902107	0.367	0.453596	-0.435334	1.24264	0.214	0.326189	0.669586
REACTOME_REGULATION_OF_SIGNALING_BY_CBL	-0.903991	0.366	0.453208	-0.436519	1.67978	0.093	0.193019	1.03152
REACTOME_SIGNALING_BY_ILS	-0.90777	0.364	0.451579	-0.438899	3.29053	0.001	0.0152824	3
REACTOME_MAPK_TARGETS_NUCLEAR_EVENTS_MEDIATED_BY_MAP_KINASES	-0.90777	0.364	0.451579	-0.438899	1.95148	0.051	0.136829	1.29243
REACTOME_ENDOGENOUS_STEROLS	-0.90777	0.364	0.451579	-0.438899	-1.20036	0.23	0.339597	-0.638272
REACTOME_KERATAN_SULFATE_BIOSYNTHESIS	-0.909663	0.363	0.451579	-0.440093	1.90331	0.057	0.141962	1.24413
REACTOME_OTHER_SEMAPHORIN_INTERACTIONS	-0.911561	0.362	0.451579	-0.441291	2.19729	0.028	0.100984	1.55284
REACTOME_RNA_POL_III_TRANSCRIPTION	-0.919183	0.358	0.448349	-0.446117	-2.81864	0.00482269	0.0347699	-2.31671
REACTOME_ACYL_CHAIN_REMODELLING_OF_PS	-0.923014	0.356	0.446692	-0.44855	-0.735558	0.462	0.510754	-0.335358
REACTOME_CTNNB1_PHOSPHORYLATION_CASCADE	-0.924934	0.355	0.446692	-0.449772	0.984235	0.325	0.420925	0.488117
REACTOME_ERK_MAPK_TARGETS	-0.926859	0.354	0.446692	-0.450997	1.71144	0.087	0.184038	1.06048
REACTOME_SIGNALING_BY_FGFR_MUTANTS	-0.930717	0.352	0.445057	-0.453457	1.76241	0.078	0.174381	1.10791
REACTOME_FRS2_MEDIATED_CASCADE	-0.930717	0.352	0.445057	-0.453457	1.32552	0.185	0.299265	0.732828
REACTOME_THE_ACTIVATION_OF_ARYLSULFATASES	-0.950221	0.342	0.436596	-0.465974	1.20294	0.229	0.338879	0.640165
REACTOME_RNA_POL_III_TRANSCRIPTION_INITIATION_FROM_TYPE_2_PROMOTER	-0.950221	0.342	0.436596	-0.465974	-2.60927	0.00907355	0.0499362	-2.04222
REACTOME_PECAM1_INTERACTIONS	-0.962099	0.336	0.430602	-0.473661	-0.755415	0.45	0.502804	-0.346787
REACTOME_TRAFFICKING_OF_GLUR2_CONTAINING_AMPA_RECEPTORS	-0.966088	0.334	0.429708	-0.476254	1.00895	0.313	0.412335	0.504456
REACTOME_SYNTHESIS_OF_PA	-0.966088	0.334	0.429708	-0.476254	-0.832725	0.405	0.468126	-0.392545
REACTOME_GPCR_DOWNSTREAM_SIGNALING	-0.968089	0.333	0.429708	-0.477556	3.29053	0.001	0.0152824	3
REACTOME_SIGNALING_BY_NOTCH3	-0.970093	0.332	0.429708	-0.478862	-0.787482	0.431	0.487925	-0.365523
REACTOME_REGULATION_OF_GENE_EXPRESSION_IN_BETA_CELLS	-0.974114	0.33	0.429708	-0.481486	-0.924934	0.355	0.435502	-0.449772
REACTOME_GLYCEROPHOSPHOLIPID_BIOSYNTHESIS	-0.974114	0.33	0.429708	-0.481486	-1.65463	0.098	0.199015	-1.00877
REACTOME_INTEGRATION_OF_PROVIRUS	-0.980174	0.327	0.429066	-0.485452	-0.709523	0.478	0.524053	-0.320572
REACTOME_RESOLUTION_OF_AP_SITES_VIA_THE_SINGLE_NUCLEOTIDE_REPLACEMENT_PATHWAY	-0.982203	0.326	0.428606	-0.486782	-2.60289	0.00924411	0.0499362	-2.03414
REACTOME_NEGATIVE_REGULATION_OF_FGFR_SIGNALING	-0.984235	0.325	0.428606	-0.488117	1.79912	0.072	0.166154	1.14267
REACTOME_NEGATIVE_REGULATION_OF_THE_PI3K_AKT_NETWORK	-0.992405	0.321	0.424569	-0.493495	0.928786	0.353	0.434664	0.452225
REACTOME_NFKB_AND_MAP_KINASES_ACTIVATION_MEDIATED_BY_TLR4_SIGNALING_REPERTOIRE	-0.994458	0.32	0.424096	-0.49485	1.8735	0.061	0.147473	1.21467
REACTOME_ACTIVATION_OF_THE_AP1_FAMILY_OF_TRANSCRIPTION_FACTORS	-1.00686	0.314	0.416982	-0.50307	1.26464	0.206	0.318407	0.686133
REACTOME_ADVANCED_GLYCOSYLATION_ENDPRODUCT_RECEPTOR_SIGNALING	-1.01103	0.312	0.416	-0.505845	1.55898	0.119	0.22569	0.924453
REACTOME_SIGNALING_BY_NOTCH4	-1.01103	0.312	0.416	-0.505845	-0.742144	0.458	0.508034	-0.339135
REACTOME_SYNTHESIS_OF_SUBSTRATES_IN_N_GLYCAN_BIOSYTHESIS	-1.01103	0.312	0.416	-0.505845	-0.942376	0.346	0.434144	-0.460924
REACTOME_TRIF_MEDIATED_TLR3_SIGNALING	-1.01313	0.311	0.416	-0.50724	1.90331	0.057	0.141962	1.24413
REACTOME_LIPOPROTEIN_METABOLISM	-1.01313	0.311	0.416	-0.50724	-0.88529	0.376	0.44553	-0.424812
REACTOME_BASE_FREE_SUGAR_PHOSPHATE_REMOVAL_VIA_THE_SINGLE_NUCLEOTIDE_REPLACEMENT_PATHWAY	-1.01313	0.311	0.416	-0.50724	-1.9863	0.047	0.131441	-1.3279
REACTOME_CYTOSOLIC_SULFONATION_OF_SMALL_MOLECULES	-1.01522	0.31	0.416	-0.508638	-1.78046	0.075	0.17069	-1.12494
REACTOME_PTM_GAMMA_CARBOXYLATION_HYPUSINE_FORMATION_AND_ARYLSULFATASE_ACTIVATION	-1.02154	0.307	0.416	-0.512862	1.14309	0.253	0.361429	0.596879
REACTOME_SIGNALING_BY_CONSTITUTIVELY_ACTIVE_EGFR	-1.03002	0.303	0.414896	-0.518557	-0.521527	0.602	0.616	-0.220404
REACTOME_G_ALPHA_Q_SIGNALLING_EVENTS	-1.03858	0.299	0.411125	-0.524329	2.17009	0.03	0.104211	1.52288
REACTOME_SYNTHESIS_OF_PE	-1.03858	0.299	0.411125	-0.524329	-2.277	0.022786	0.0874347	-1.64233
REACTOME_KERATAN_SULFATE_KERATIN_METABOLISM	-1.04722	0.295	0.407322	-0.530178	2.13208	0.033	0.11	1.48149
REACTOME_MUSCLE_CONTRACTION	-1.06032	0.289	0.404968	-0.539102	-0.48032	0.631	0.637764	-0.199971
REACTOME_PHOSPHORYLATION_OF_CD3_AND_TCR_ZETA_CHAINS	-1.06032	0.289	0.404968	-0.539102	-0.841621	0.4	0.464789	-0.39794
REACTOME_NUCLEOTIDE_LIKE_PURINERGIC_RECEPTORS	-1.06252	0.288	0.404968	-0.540608	1.19012	0.234	0.343142	0.630784
REACTOME_CLASS_I_MHC_MEDIATED_ANTIGEN_PROCESSING_PRESENTATION	-1.06473	0.287	0.404968	-0.542118	-0.643345	0.52	0.550883	-0.283997
REACTOME_SIGNAL_TRANSDUCTION_BY_L1	-1.06915	0.285	0.404968	-0.545155	2.06419	0.039	0.121747	1.40894
REACTOME_SYNTHESIS_SECRETION_AND_DEACYLATION_OF_GHRELIN	-1.07138	0.284	0.404968	-0.546682	-1.08708	0.277	0.377727	-0.55752
REACTOME_MEMBRANE_TRAFFICKING	-1.07584	0.282	0.404609	-0.549751	-1.81191	0.07	0.16383	-1.1549
REACTOME_TAK1_ACTIVATES_NFKB_BY_PHOSPHORYLATION_AND_ACTIVATION_OF_IKKS_COMPLEX	-1.08482	0.278	0.401176	-0.555955	1.11	0.267	0.373585	0.573489
REACTOME_ANTIGEN_PROCESSING_UBIQUITINATION_PROTEASOME_DEGRADATION	-1.08708	0.277	0.401176	-0.55752	-1.20812	0.227	0.337432	-0.643974
REACTOME_ADHERENS_JUNCTIONS_INTERACTIONS	-1.08935	0.276	0.401176	-0.559091	2.03038	0.0423176	0.125245	1.37348
REACTOME_LYSOSOME_VESICLE_BIOGENESIS	-1.09618	0.273	0.399205	-0.563837	0.934589	0.35	0.434664	0.455932
REACTOME_PHOSPHOLIPID_METABOLISM	-1.10076	0.271	0.398352	-0.567031	-0.868721	0.385	0.451332	-0.414539
REACTOME_TOLL_RECEPTOR_CASCADES	-1.10537	0.269	0.396295	-0.570248	2.09693	0.036	0.115902	1.4437
REACTOME_VOLTAGE_GATED_POTASSIUM_CHANNELS	-1.10768	0.268	0.395705	-0.571865	-0.877896	0.38	0.447857	-0.420216
REACTOME_METABOLISM_OF_STEROID_HORMONES_AND_VITAMINS_A_AND_D	-1.10768	0.268	0.395705	-0.571865	-2.00465	0.045	0.128019	-1.34679
REACTOME_SIGNALLING_TO_ERKS	-1.12403	0.261	0.390612	-0.583359	-0.48032	0.631	0.637764	-0.199971
REACTOME_DOPAMINE_NEUROTRANSMITTER_RELEASE_CYCLE	-1.12639	0.26	0.39	-0.585027	-0.872382	0.383	0.449786	-0.416801
REACTOME_SIGNALLING_BY_NGF	-1.12876	0.259	0.389385	-0.5867	1.90331	0.057	0.141962	1.24413
REACTOME_CS_DS_DEGRADATION	-1.13351	0.257	0.388767	-0.590067	2.13208	0.033	0.11	1.48149
REACTOME_ACTIVATION_OF_RAC	-1.14309	0.253	0.385635	-0.596879	1.19779	0.231	0.340313	0.636388
REACTOME_BILE_ACID_AND_BILE_SALT_METABOLISM	-1.14309	0.253	0.385635	-0.596879	-1.90331	0.057	0.141962	-1.24413
REACTOME_REGULATION_OF_IFNG_SIGNALING	-1.14792	0.251	0.384362	-0.600326	1.31652	0.188	0.29971	0.725842
REACTOME_AMINE_COMPOUND_SLC_TRANSPORTERS	-1.15767	0.247	0.380888	-0.607303	-0.703089	0.482	0.527562	-0.316953
REACTOME_RNA_POL_III_TRANSCRIPTION_INITIATION_FROM_TYPE_3_PROMOTER	-1.15767	0.247	0.380888	-0.607303	-2.00465	0.0450007	0.128019	-1.34678
REACTOME_GLYCOSPHINGOLIPID_METABOLISM	-1.16012	0.246	0.380888	-0.609065	-0.568051	0.57	0.590581	-0.244125
REACTOME_SYNTHESIS_SECRETION_AND_INACTIVATION_OF_GLP1	-1.16012	0.246	0.380888	-0.609065	-0.715986	0.474	0.520532	-0.324222
REACTOME_TRANSCRIPTION	-1.16012	0.246	0.380888	-0.609065	-3.07495	0.00210535	0.0240529	-2.67668
REACTOME_INSULIN_RECEPTOR_RECYCLING	-1.16258	0.245	0.380888	-0.610834	2.30798	0.021	0.083494	1.67778
REACTOME_TANDEM_PORE_DOMAIN_POTASSIUM_CHANNELS	-1.17	0.242	0.380286	-0.616185	2.23522	0.0254032	0.0941916	1.59511
REACTOME_CRMPS_IN_SEMA3A_SIGNALING	-1.18	0.238	0.375789	-0.623423	1.01943	0.308	0.409839	0.511449
REACTOME_PPARA_ACTIVATES_GENE_EXPRESSION	-1.18758	0.235	0.374638	-0.628932	1.75652	0.079	0.174381	1.10237
REACTOME_MYOGENESIS	-1.19012	0.234	0.374638	-0.630784	-0.649524	0.516	0.54929	-0.28735
REACTOME_BIOSYNTHESIS_OF_THE_N_GLYCAN_PRECURSOR_DOLICHOL_LIPID_LINKED_OLIGOSACCHARIDE_LLO_AND_TRANSFER_TO_A_NASCENT_PROTEIN	-1.19012	0.234	0.374638	-0.630784	-1.67466	0.094	0.194483	-1.02687
REACTOME_SEROTONIN_RECEPTORS	-1.19267	0.233	0.374638	-0.632644	1.35946	0.174	0.28782	0.759451
REACTOME_INWARDLY_RECTIFYING_K_CHANNELS	-1.19522	0.232	0.374638	-0.634512	-1.21596	0.224	0.333725	-0.649752
REACTOME_NOREPINEPHRINE_NEUROTRANSMITTER_RELEASE_CYCLE	-1.20294	0.229	0.371351	-0.640165	-0.797777	0.425	0.482788	-0.371611
REACTOME_PURINE_METABOLISM	-1.20294	0.229	0.371351	-0.640165	-2.265	0.023513	0.0886775	-1.62869
REACTOME_TERMINATION_OF_O_GLYCAN_BIOSYNTHESIS	-1.21073	0.226	0.371045	-0.645892	-0.74545	0.456	0.507521	-0.341035
REACTOME_CLEAVAGE_OF_GROWING_TRANSCRIPT_IN_THE_TERMINATION_REGION_	-1.22653	0.22	0.36391	-0.657577	-2.48516	0.0129494	0.0626277	-1.88775
REACTOME_ACTIVATED_TLR4_SIGNALLING	-1.22919	0.219	0.363166	-0.659556	1.91104	0.056	0.141962	1.25181
REACTOME_INTERFERON_GAMMA_SIGNALING	-1.22919	0.219	0.363166	-0.659556	1.04289	0.297	0.397606	0.527244
REACTOME_ARMS_MEDIATED_ACTIVATION	-1.23993	0.215	0.361069	-0.667562	1.10306	0.27	0.373585	0.568636
REACTOME_SPHINGOLIPID_METABOLISM	-1.23993	0.215	0.361069	-0.667562	1.09847	0.272	0.373817	0.565431
REACTOME_APOPTOSIS_INDUCED_DNA_FRAGMENTATION	-1.23993	0.215	0.361069	-0.667562	1.00479	0.315	0.414143	0.501689
REACTOME_REGULATION_OF_BETA_CELL_DEVELOPMENT	-1.23993	0.215	0.361069	-0.667562	-1.22123	0.222	0.333725	-0.653647
REACTOME_INCRETIN_SYNTHESIS_SECRETION_AND_INACTIVATION	-1.24264	0.214	0.361069	-0.669586	-0.757083	0.449	0.502804	-0.347754
REACTOME_AMINO_ACID_AND_OLIGOPEPTIDE_SLC_TRANSPORTERS	-1.24808	0.212	0.361069	-0.673664	-2.60416	0.0092099	0.0499362	-2.03575
REACTOME_SYNTHESIS_SECRETION_AND_INACTIVATION_OF_GIP	-1.25082	0.211	0.360777	-0.675718	-0.896473	0.37	0.442391	-0.431798
REACTOME_CREB_PHOSPHORYLATION_THROUGH_THE_ACTIVATION_OF_CAMKII	-1.25632	0.209	0.358286	-0.679854	1.51806	0.129	0.239157	0.88941
REACTOME_GLYCOGEN_BREAKDOWN_GLYCOGENOLYSIS	-1.26464	0.206	0.354063	-0.686133	0.972102	0.331	0.420925	0.480172
REACTOME_PRE_NOTCH_PROCESSING_IN_GOLGI	-1.26743	0.205	0.354063	-0.688246	1.94313	0.052	0.137831	1.284
REACTOME_HYALURONAN_METABOLISM	-1.26743	0.205	0.354063	-0.688246	0.942376	0.346	0.434144	0.460924
REACTOME_INHIBITION_OF_VOLTAGE_GATED_CA2_CHANNELS_VIA_GBETA_GAMMA_SUBUNITS	-1.27305	0.203	0.354063	-0.692504	-1.62108	0.105	0.207485	-0.978811
REACTOME_P38MAPK_EVENTS	-1.27305	0.203	0.354063	-0.692504	-1.77438	0.076	0.171781	-1.11919
REACTOME_SYNTHESIS_OF_BILE_ACIDS_AND_BILE_SALTS_VIA_7ALPHA_HYDROXYCHOLESTEROL	-1.27305	0.203	0.354063	-0.692504	-1.97737	0.048	0.133109	-1.31876
REACTOME_DOWNSTREAM_SIGNAL_TRANSDUCTION	-1.27871	0.201	0.354063	-0.696804	2.10017	0.0357139	0.115902	1.44716
REACTOME_MAP_KINASE_ACTIVATION_IN_TLR_CASCADE	-1.27871	0.201	0.354063	-0.696804	2.09693	0.036	0.115902	1.4437
REACTOME_MITOCHONDRIAL_FATTY_ACID_BETA_OXIDATION	-1.28727	0.198	0.35129	-0.703335	-1.71689	0.086	0.182508	-1.0655
REACTOME_STEROID_HORMONES	-1.28727	0.198	0.35129	-0.703335	-1.83842	0.066	0.157256	-1.18046
REACTOME_RNA_POL_III_TRANSCRIPTION_TERMINATION	-1.29303	0.196	0.350569	-0.707744	-1.99082	0.0465003	0.130597	-1.33254
REACTOME_SIGNALING_BY_ROBO_RECEPTOR	-1.29884	0.194	0.347935	-0.712198	1.42554	0.154	0.266073	0.812479
REACTOME_NOTCH1_INTRACELLULAR_DOMAIN_REGULATES_TRANSCRIPTION	-1.30469	0.192	0.34623	-0.716699	-0.481727	0.63	0.637764	-0.200659
REACTOME_PHOSPHOLIPASE_C_MEDIATED_CASCADE	-1.30763	0.191	0.34623	-0.718967	2.15707	0.031	0.10712	1.50864
REACTOME_CTLA4_INHIBITORY_SIGNALING	-1.31652	0.188	0.342762	-0.725842	0.919183	0.358	0.436747	0.446117
REACTOME_GASTRIN_CREB_SIGNALLING_PATHWAY_VIA_PKC_AND_MAPK	-1.32552	0.185	0.340111	-0.732828	2.5427	0.011	0.0554198	1.95861
REACTOME_SIGNALLING_TO_P38_VIA_RIT_AND_RIN	-1.33157	0.183	0.338319	-0.737549	1.11	0.267	0.373585	0.573489
REACTOME_PYRUVATE_METABOLISM	-1.33157	0.183	0.338319	-0.737549	-2.61355	0.00896072	0.0499362	-2.04766
REACTOME_SIGNALING_BY_NOTCH2	-1.34694	0.178	0.331864	-0.74958	-0.753749	0.451	0.502804	-0.345823
REACTOME_NOD1_2_SIGNALING_PATHWAY	-1.35317	0.176	0.329065	-0.754487	-0.992405	0.321	0.420357	-0.493495
REACTOME_GAP_JUNCTION_TRAFFICKING	-1.35631	0.175	0.328125	-0.756962	1.10306	0.27	0.373585	0.568636
REACTOME_AMINO_ACID_TRANSPORT_ACROSS_THE_PLASMA_MEMBRANE	-1.36263	0.173	0.325299	-0.761954	-2.50497	0.0122462	0.0598702	-1.912
REACTOME_PROCESSING_OF_CAPPED_INTRONLESS_PRE_MRNA	-1.36581	0.172	0.324343	-0.764472	-1.95148	0.051	0.136829	-1.29243
REACTOME_IMMUNOREGULATORY_INTERACTIONS_BETWEEN_A_LYMPHOID_AND_A_NON_LYMPHOID_CELL	-1.369	0.171	0.323381	-0.767004	-0.966088	0.334	0.422299	-0.476254
REACTOME_SHC_MEDIATED_SIGNALLING	-1.3722	0.17	0.322414	-0.769551	0.990356	0.322	0.420832	0.492144
REACTOME_SMOOTH_MUSCLE_CONTRACTION	-1.3722	0.17	0.322414	-0.769551	0.823894	0.41	0.470609	0.387216
REACTOME_CLASS_A1_RHODOPSIN_LIKE_RECEPTORS	-1.37542	0.169	0.32237	-0.772113	2.48377	0.013	0.0626277	1.88606
REACTOME_SYNTHESIS_OF_VERY_LONG_CHAIN_FATTY_ACYL_COAS	-1.37542	0.169	0.32237	-0.772113	0.930717	0.352	0.434664	0.453457
REACTOME_ACTIVATED_NOTCH1_TRANSMITS_SIGNAL_TO_THE_NUCLEUS	-1.37542	0.169	0.32237	-0.772113	-0.930717	0.352	0.434664	-0.453457
REACTOME_LIPID_DIGESTION_MOBILIZATION_AND_TRANSPORT	-1.38517	0.166	0.319417	-0.779892	-1.14551	0.252	0.360781	-0.598599
REACTOME_ACTIVATED_POINT_MUTANTS_OF_FGFR2	-1.38845	0.165	0.319355	-0.782516	1.33462	0.182	0.295862	0.739929
REACTOME_CELL_EXTRACELLULAR_MATRIX_INTERACTIONS	-1.38845	0.165	0.319355	-0.782516	1.14069	0.254	0.362073	0.595166
REACTOME_A_TETRASACCHARIDE_LINKER_SEQUENCE_IS_REQUIRED_FOR_GAG_SYNTHESIS	-1.39174	0.164	0.319355	-0.785156	1.90331	0.057	0.141962	1.24413
REACTOME_SYNTHESIS_OF_BILE_ACIDS_AND_BILE_SALTS	-1.39505	0.163	0.319228	-0.787812	-2.02371	0.043	0.126133	-1.36653
REACTOME_TCA_CYCLE_AND_RESPIRATORY_ELECTRON_TRANSPORT	-1.39505	0.163	0.319228	-0.787812	-3.48085	0.000499824	0.012163	-3.30118
REACTOME_TRAF6_MEDIATED_IRF7_ACTIVATION_IN_TLR7_8_OR_9_SIGNALING	-1.40172	0.161	0.318144	-0.793174	-0.671346	0.502	0.539609	-0.299296
REACTOME_ENDOSOMAL_SORTING_COMPLEX_REQUIRED_FOR_TRANSPORT_ESCRT	-1.40172	0.161	0.318144	-0.793174	-1.50626	0.132	0.242	-0.879426
REACTOME_RAP1_SIGNALLING	-1.40844	0.159	0.316084	-0.798603	-0.938476	0.348	0.434664	-0.458421
REACTOME_ACTIVATION_OF_CHAPERONE_GENES_BY_XBP1S	-1.41183	0.158	0.315045	-0.801343	2.61205	0.009	0.0499362	2.04576
REACTOME_PEPTIDE_HORMONE_BIOSYNTHESIS	-1.41183	0.158	0.315045	-0.801343	0.784068	0.433	0.489349	0.363512
REACTOME_MYD88_MAL_CASCADE_INITIATED_ON_PLASMA_MEMBRANE	-1.41523	0.157	0.314954	-0.8041	1.8735	0.061	0.147473	1.21467
REACTOME_RAS_ACTIVATION_UOPN_CA2_INFUX_THROUGH_NMDA_RECEPTOR	-1.42209	0.155	0.312844	-0.809668	1.59371	0.111	0.216106	0.954677
REACTOME_FORMATION_OF_TRANSCRIPTION_COUPLED_NER_TC_NER_REPAIR_COMPLEX	-1.42209	0.155	0.312844	-0.809668	-2.70676	0.00679434	0.0407661	-2.16785
REACTOME_GRB2_EVENTS_IN_ERBB2_SIGNALING	-1.42554	0.154	0.312738	-0.812479	1.31652	0.188	0.29971	0.725842
REACTOME_DIABETES_PATHWAYS	-1.44663	0.148	0.30525	-0.829738	-0.638728	0.523	0.553173	-0.281498
REACTOME_ELONGATION_ARREST_AND_RECOVERY	-1.44663	0.148	0.30525	-0.829738	-1.75069	0.08	0.176	-1.09691
REACTOME_SHC1_EVENTS_IN_ERBB4_SIGNALING	-1.45021	0.147	0.305094	-0.832683	1.23723	0.216	0.327724	0.665546
REACTOME_PROLONGED_ERK_ACTIVATION_EVENTS	-1.45381	0.146	0.303975	-0.835647	1.11	0.267	0.373585	0.573489
REACTOME_EICOSANOID_LIGAND_BINDING_RECEPTORS	-1.45742	0.145	0.30381	-0.838632	1.58047	0.114	0.22	0.943095
REACTOME_PROTEIN_FOLDING	-1.45742	0.145	0.30381	-0.838632	-2.75017	0.0059565	0.038565	-2.22501
REACTOME_RNA_POL_III_CHAIN_ELONGATION	-1.46106	0.144	0.303642	-0.841638	-2.03352	0.042	0.124865	-1.37675
REACTOME_VIRAL_MESSENGER_RNA_SYNTHESIS	-1.46471	0.143	0.3025	-0.844664	-2.04353	0.041	0.123562	-1.38722
REACTOME_SIGNALLING_TO_RAS	-1.46838	0.142	0.3025	-0.847712	-0.984235	0.325	0.420925	-0.488117
REACTOME_TRAF6_MEDIATED_INDUCTION_OF_NFKB_AND_MAP_KINASES_UPON_TLR7_8_OR_9_ACTIVATION	-1.48328	0.138	0.297647	-0.860121	1.58047	0.114	0.22	0.943095
REACTOME_YAP1_AND_WWTR1_TAZ_STIMULATED_GENE_EXPRESSION	-1.48328	0.138	0.297647	-0.860121	1.40172	0.161	0.273866	0.793174
REACTOME_JNK_C_JUN_KINASES_PHOSPHORYLATION_AND_ACTIVATION_MEDIATED_BY_ACTIVATED_HUMAN_TAK1	-1.48706	0.137	0.297647	-0.863279	1.65957	0.097	0.198204	1.01323
REACTOME_NGF_SIGNALLING_VIA_TRKA_FROM_THE_PLASMA_MEMBRANE	-1.49085	0.136	0.297219	-0.866461	2.74778	0.006	0.038565	2.22185
REACTOME_SYNTHESIS_OF_BILE_ACIDS_AND_BILE_SALTS_VIA_24_HYDROXYCHOLESTEROL	-1.49851	0.134	0.293821	-0.872895	-1.33157	0.183	0.296757	-0.737549
REACTOME_PROSTANOID_LIGAND_RECEPTORS	-1.50238	0.133	0.2926	-0.876148	1.64972	0.099	0.199817	1.00436
REACTOME_PLATELET_HOMEOSTASIS	-1.50238	0.133	0.2926	-0.876148	-0.596262	0.551	0.575411	-0.258848
REACTOME_PLATELET_ADHESION_TO_EXPOSED_COLLAGEN	-1.50238	0.133	0.2926	-0.876148	-0.680797	0.496	0.537059	-0.304518
REACTOME_REGULATION_OF_INSULIN_SECRETION_BY_ACETYLCHOLINE	-1.50626	0.132	0.2926	-0.879426	2.14441	0.032	0.108866	1.49485
REACTOME_FGFR2C_LIGAND_BINDING_AND_ACTIVATION	-1.51806	0.129	0.28861	-0.88941	1.26186	0.207	0.319206	0.68403
REACTOME_NA_CL_DEPENDENT_NEUROTRANSMITTER_TRANSPORTERS	-1.51806	0.129	0.28861	-0.88941	-1.42901	0.153	0.265737	-0.815309
REACTOME_TRIGLYCERIDE_BIOSYNTHESIS	-1.52204	0.128	0.28861	-0.89279	-1.31652	0.188	0.29971	-0.725842
REACTOME_MEMBRANE_BINDING_AND_TARGETTING_OF_GAG_PROTEINS	-1.52204	0.128	0.28861	-0.89279	-1.54643	0.122	0.230057	-0.91364
REACTOME_POST_NMDA_RECEPTOR_ACTIVATION_EVENTS	-1.52604	0.127	0.28861	-0.896196	2.00465	0.045	0.128019	1.34679
REACTOME_SIGNALING_BY_NOTCH1	-1.53412	0.125	0.286458	-0.90309	-0.490189	0.624	0.635556	-0.204815
REACTOME_ANTIVIRAL_MECHANISM_BY_IFN_STIMULATED_GENES	-1.53412	0.125	0.286458	-0.90309	-1.6027	0.109	0.213472	-0.962574
REACTOME_IONOTROPIC_ACTIVITY_OF_KAINATE_RECEPTORS	-1.54643	0.122	0.281538	-0.91364	-0.631062	0.528	0.556677	-0.277366
REACTOME_FATTY_ACID_TRIACYLGLYCEROL_AND_KETONE_BODY_METABOLISM	-1.54643	0.122	0.281538	-0.91364	-0.773883	0.439	0.495282	-0.357535
REACTOME_RNA_POL_II_TRANSCRIPTION_PRE_INITIATION_AND_PROMOTER_OPENING	-1.54643	0.122	0.281538	-0.91364	-2.36197	0.0181781	0.0759339	-1.74045
REACTOME_ACTIVATION_OF_NMDA_RECEPTOR_UPON_GLUTAMATE_BINDING_AND_POSTSYNAPTIC_EVENTS	-1.55477	0.12	0.279859	-0.920819	2.27343	0.023	0.0877457	1.63827
REACTOME_NOTCH_HLH_TRANSCRIPTION_PATHWAY	-1.56322	0.118	0.277153	-0.928118	-0.67764	0.498	0.537059	-0.302771
REACTOME_SULFUR_AMINO_ACID_METABOLISM	-1.57611	0.115	0.271071	-0.939302	-2.14815	0.0317019	0.108866	-1.49891
REACTOME_MRNA_CAPPING	-1.57611	0.115	0.271071	-0.939302	-2.43851	0.0147479	0.0680671	-1.83127
REACTOME_SOS_MEDIATED_SIGNALLING	-1.58047	0.114	0.270647	-0.943095	1.11933	0.263	0.372489	0.580044
REACTOME_NEF_MEDIATES_DOWN_MODULATION_OF_CELL_SURFACE_RECEPTORS_BY_RECRUITING_THEM_TO_CLATHRIN_ADAPTERS	-1.58485	0.113	0.269242	-0.946922	1.22387	0.221	0.333725	0.655608
REACTOME_PKA_MEDIATED_PHOSPHORYLATION_OF_CREB	-1.58927	0.112	0.269242	-0.950782	1.47579	0.14	0.253151	0.853872
REACTOME_DOWNSTREAM_SIGNALING_OF_ACTIVATED_FGFR	-1.59371	0.111	0.269242	-0.954677	2.05418	0.0399583	0.122222	1.39839
REACTOME_HORMONE_SENSITIVE_LIPASE_HSL_MEDIATED_TRIACYLGLYCEROL_HYDROLYSIS	-1.59819	0.11	0.267897	-0.958607	-1.10306	0.27	0.373585	-0.568636
REACTOME_PEROXISOMAL_LIPID_METABOLISM	-1.63048	0.103	0.256528	-0.987163	-1.78046	0.075	0.17069	-1.12494
REACTOME_FORMATION_OF_RNA_POL_II_ELONGATION_COMPLEX_	-1.63048	0.103	0.256528	-0.987163	-2.22867	0.0258359	0.0948066	-1.58778
REACTOME_SIGNALING_BY_GPCR	-1.63523	0.102	0.25597	-0.9914	3.29053	0.001	0.0152824	3
REACTOME_KERATAN_SULFATE_DEGRADATION	-1.63523	0.102	0.25597	-0.9914	1.18758	0.235	0.343142	0.628932
REACTOME_AMINE_LIGAND_BINDING_RECEPTORS	-1.64002	0.101	0.255402	-0.995679	1.41523	0.157	0.268446	0.8041
REACTOME_SIGNALING_BY_SCF_KIT	-1.64485	0.1	0.254826	-1	2.30798	0.021	0.083494	1.67778
REACTOME_SHC1_EVENTS_IN_EGFR_SIGNALING	-1.64485	0.1	0.254826	-1	1.26743	0.205	0.317606	0.688246
REACTOME_DESTABILIZATION_OF_MRNA_BY_AUF1_HNRNP_D0	-1.64485	0.1	0.254826	-1	-2.96287	0.00304783	0.0286248	-2.51601
REACTOME_MEIOTIC_SYNAPSIS	-1.64972	0.099	0.254826	-1.00436	1.29593	0.195	0.306429	0.709965
REACTOME_CHYLOMICRON_MEDIATED_LIPID_TRANSPORT	-1.64972	0.099	0.254826	-1.00436	1.06473	0.287	0.387362	0.542118
REACTOME_DARPP_32_EVENTS	-1.64972	0.099	0.254826	-1.00436	0.984235	0.325	0.420925	0.488117
REACTOME_REVERSIBLE_HYDRATION_OF_CARBON_DIOXIDE	-1.64972	0.099	0.254826	-1.00436	-1.75652	0.079	0.174381	-1.10237
REACTOME_ACYL_CHAIN_REMODELLING_OF_PG	-1.65463	0.098	0.254826	-1.00877	-0.909663	0.363	0.439599	-0.440093
REACTOME_RNA_POL_II_PRE_TRANSCRIPTION_EVENTS	-1.65463	0.098	0.254826	-1.00877	-2.13331	0.0328994	0.11	-1.48281
REACTOME_NEURONAL_SYSTEM	-1.66456	0.096	0.25344	-1.01773	2.14441	0.032	0.108866	1.49485
REACTOME_THROMBIN_SIGNALLING_THROUGH_PROTEINASE_ACTIVATED_RECEPTORS_PARS	-1.66959	0.095	0.251807	-1.02228	1.17249	0.241	0.349582	0.617983
REACTOME_RNA_POL_II_TRANSCRIPTION	-1.67466	0.094	0.251174	-1.02687	-2.76602	0.00567443	0.0376633	-2.24608
REACTOME_DOWNSTREAM_SIGNALING_EVENTS_OF_B_CELL_RECEPTOR_BCR	-1.68494	0.092	0.246829	-1.03621	-1.5141	0.13	0.240336	-0.886057
REACTOME_EARLY_PHASE_OF_HIV_LIFE_CYCLE	-1.6954	0.09	0.242449	-1.04576	1.11699	0.264	0.373105	0.578396
REACTOME_SYNTHESIS_OF_GLYCOSYLPHOSPHATIDYLINOSITOL_GPI	-1.6954	0.09	0.242449	-1.04576	-1.57611	0.115	0.221283	-0.939302
REACTOME_METABOLISM_OF_RNA	-1.6954	0.09	0.242449	-1.04576	-3.91563	9.01679e-05	0.012163	-4.04495
REACTOME_SIGNALING_BY_ERBB2	-1.70604	0.088	0.24	-1.05552	2.19729	0.028	0.100984	1.55284
REACTOME_POTASSIUM_CHANNELS	-1.70604	0.088	0.24	-1.05552	-0.540286	0.589	0.603634	-0.229885
REACTOME_ACTIVATION_OF_BH3_ONLY_PROTEINS	-1.71144	0.087	0.23925	-1.06048	-0.732276	0.464	0.512107	-0.333482
REACTOME_GABA_B_RECEPTOR_ACTIVATION	-1.71689	0.086	0.23749	-1.0655	-0.568051	0.57	0.590581	-0.244125
REACTOME_INTERFERON_SIGNALING	-1.74491	0.081	0.227489	-1.09151	-1.09847	0.272	0.373817	-0.565431
REACTOME_GPCR_LIGAND_BINDING	-1.75652	0.079	0.223777	-1.10237	1.3722	0.17	0.283333	0.769551
REACTOME_HEPARAN_SULFATE_HEPARIN_HS_GAG_METABOLISM	-1.76836	0.077	0.219052	-1.11351	2.17009	0.03	0.104211	1.52288
REACTOME_IRAK1_RECRUITS_IKK_COMPLEX	-1.76836	0.077	0.219052	-1.11351	-1.08032	0.28	0.381031	-0.552842
REACTOME_HIGHLY_CALCIUM_PERMEABLE_POSTSYNAPTIC_NICOTINIC_ACETYLCHOLINE_RECEPTORS	-1.77438	0.076	0.218087	-1.11919	0.827418	0.408	0.469948	0.38934
REACTOME_INTRINSIC_PATHWAY_FOR_APOPTOSIS	-1.77438	0.076	0.218087	-1.11919	-0.970093	0.332	0.421385	-0.478862
REACTOME_TRANSMISSION_ACROSS_CHEMICAL_SYNAPSES	-1.78046	0.075	0.218062	-1.12494	1.39505	0.163	0.274439	0.787812
REACTOME_PERK_REGULATED_GENE_EXPRESSION	-1.78661	0.074	0.216106	-1.13077	-2.10703	0.035115	0.115303	-1.45451
REACTOME_ANTIGEN_PROCESSING_CROSS_PRESENTATION	-1.79912	0.072	0.212143	-1.14267	-2.02128	0.0432509	0.126308	-1.364
REACTOME_ACETYLCHOLINE_BINDING_AND_DOWNSTREAM_EVENTS	-1.81191	0.07	0.208108	-1.1549	0.872382	0.383	0.449786	0.416801
REACTOME_CREB_PHOSPHORYLATION_THROUGH_THE_ACTIVATION_OF_RAS	-1.81842	0.069	0.206063	-1.16115	2.32635	0.02	0.0807358	1.69897
REACTOME_UNFOLDED_PROTEIN_RESPONSE	-1.81842	0.069	0.206063	-1.16115	1.31652	0.188	0.29971	0.725842
REACTOME_PURINE_CATABOLISM	-1.81842	0.069	0.206063	-1.16115	0.81338	0.416	0.474197	0.380907
REACTOME_RAF_MAP_KINASE_CASCADE	-1.83167	0.067	0.203779	-1.17393	-0.67764	0.498	0.537059	-0.302771
REACTOME_CONVERSION_FROM_APC_C_CDC20_TO_APC_C_CDH1_IN_LATE_ANAPHASE	-1.83167	0.067	0.203779	-1.17393	-1.66456	0.096	0.19677	-1.01773
REACTOME_ALPHA_LINOLENIC_ACID_ALA_METABOLISM	-1.83167	0.067	0.203779	-1.17393	-1.93492	0.053	0.139363	-1.27572
REACTOME_SPRY_REGULATION_OF_FGF_SIGNALING	-1.84526	0.065	0.200467	-1.18709	1.43601	0.151	0.265397	0.821023
REACTOME_GABA_RECEPTOR_ACTIVATION	-1.84526	0.065	0.200467	-1.18709	-0.596262	0.551	0.575411	-0.258848
REACTOME_ADENYLATE_CYCLASE_INHIBITORY_PATHWAY	-1.85218	0.064	0.199245	-1.19382	2.14208	0.0321874	0.108942	1.49231
REACTOME_DAG_AND_IP3_SIGNALING	-1.85919	0.063	0.197062	-1.20066	1.91104	0.056	0.141962	1.25181
REACTOME_SHC_RELATED_EVENTS	-1.88079	0.06	0.191304	-1.22185	1.16752	0.243	0.350941	0.614394
REACTOME_REGULATORY_RNA_PATHWAYS	-1.88079	0.06	0.191304	-1.22185	-1.06252	0.288	0.387918	-0.540608
REACTOME_PYRIMIDINE_CATABOLISM	-1.8957	0.058	0.186732	-1.23657	-0.88529	0.376	0.44553	-0.424812
REACTOME_REGULATION_OF_THE_FANCONI_ANEMIA_PATHWAY	-1.8957	0.058	0.186732	-1.23657	-2.05375	0.04	0.122222	-1.39794
REACTOME_APOPTOSIS	-1.90331	0.057	0.186238	-1.24413	-1.73354	0.083	0.17902	-1.08092
REACTOME_FATTY_ACYL_COA_BIOSYNTHESIS	-1.91104	0.056	0.183881	-1.25181	0.936531	0.349	0.434664	0.457175
REACTOME_CHONDROITIN_SULFATE_DERMATAN_SULFATE_METABOLISM	-1.91888	0.055	0.1815	-1.25964	1.49467	0.135	0.246814	0.869666
REACTOME_GAP_JUNCTION_ASSEMBLY	-1.91888	0.055	0.1815	-1.25964	-0.687131	0.492	0.535842	-0.308035
REACTOME_ACTIVATION_OF_GENES_BY_ATF4	-1.92684	0.054	0.18	-1.26761	-2.37146	0.0177178	0.0751469	-1.75159
REACTOME_PREFOLDIN_MEDIATED_TRANSFER_OF_SUBSTRATE_TO_CCT_TRIC	-1.92684	0.054	0.18	-1.26761	-2.9443	0.00323682	0.0286248	-2.48988
REACTOME_THE_ROLE_OF_NEF_IN_HIV1_REPLICATION_AND_DISEASE_PATHOGENESIS	-1.93492	0.053	0.179385	-1.27572	0.919183	0.358	0.436747	0.446117
REACTOME_FORMATION_OF_THE_HIV1_EARLY_ELONGATION_COMPLEX	-1.93492	0.053	0.179385	-1.27572	-2.78477	0.00535662	0.0360752	-2.27111
REACTOME_MRNA_DECAY_BY_5_TO_3_EXORIBONUCLEASE	-1.95996	0.05	0.170984	-1.30103	-1.369	0.171	0.283568	-0.767004
REACTOME_HYALURONAN_UPTAKE_AND_DEGRADATION	-1.96124	0.0498509	0.170984	-1.30233	-1.13113	0.258	0.366194	-0.58838
REACTOME_NEUROTRANSMITTER_RECEPTOR_BINDING_AND_DOWNSTREAM_TRANSMISSION_IN_THE_POSTSYNAPTIC_CELL	-1.96779	0.0490924	0.169639	-1.30899	1.94313	0.052	0.137831	1.284
REACTOME_CYTOKINE_SIGNALING_IN_IMMUNE_SYSTEM	-1.96839	0.049023	0.169639	-1.3096	1.30176	0.193	0.305468	0.714443
REACTOME_HS_GAG_BIOSYNTHESIS	-1.96859	0.049	0.169639	-1.3098	1.52604	0.127	0.23678	0.896196
REACTOME_PRESYNAPTIC_NICOTINIC_ACETYLCHOLINE_RECEPTORS	-1.9863	0.047	0.165882	-1.3279	0.974114	0.33	0.420925	0.481486
REACTOME_ACTIVATION_OF_NF_KAPPAB_IN_B_CELLS	-1.99436	0.0461127	0.163857	-1.33618	-2.66493	0.00770042	0.0453775	-2.11349
REACTOME_ADENYLATE_CYCLASE_ACTIVATING_PATHWAY	-1.99539	0.046	0.163857	-1.33724	2.34553	0.019	0.0778882	1.72125
REACTOME_NEF_MEDIATED_DOWNREGULATION_OF_MHC_CLASS_I_COMPLEX_CELL_SURFACE_EXPRESSION	-2.02371	0.043	0.155082	-1.36653	1.08935	0.276	0.377143	0.559091
REACTOME_MICRORNA_MIRNA_BIOGENESIS	-2.02371	0.043	0.155082	-1.36653	-1.39505	0.163	0.274439	-0.787812
REACTOME_AXON_GUIDANCE	-2.03557	0.0417935	0.152396	-1.37889	2.80703	0.005	0.0351064	2.30103
REACTOME_CITRIC_ACID_CYCLE_TCA_CYCLE	-2.05375	0.04	0.146667	-1.39794	-2.91957	0.00350518	0.0286248	-2.45529
REACTOME_DEVELOPMENTAL_BIOLOGY	-2.05929	0.0394669	0.14552	-1.40377	2.87816	0.004	0.0310588	2.39794
REACTOME_SIGNALING_BY_WNT	-2.0997	0.0357553	0.134082	-1.44666	-2.39101	0.0168023	0.0734406	-1.77463
REACTOME_ABORTIVE_ELONGATION_OF_HIV1_TRANSCRIPT_IN_THE_ABSENCE_OF_TAT	-2.10387	0.0353894	0.133468	-1.45113	-2.03352	0.042	0.124865	-1.37675
REACTOME_HS_GAG_DEGRADATION	-2.11416	0.0345017	0.131625	-1.46216	0.877896	0.38	0.447857	0.420216
REACTOME_CLASS_B_2_SECRETIN_FAMILY_RECEPTORS	-2.12871	0.0332779	0.127694	-1.47784	-1.46471	0.143	0.255772	-0.844664
REACTOME_ER_PHAGOSOME_PATHWAY	-2.12944	0.0332177	0.127694	-1.47863	-2.5062	0.0122036	0.0598702	-1.91351
REACTOME_REGULATION_OF_MRNA_STABILITY_BY_PROTEINS_THAT_BIND_AU_RICH_ELEMENTS	-2.14088	0.0322837	0.125337	-1.49102	-2.93393	0.003347	0.0286248	-2.47534
REACTOME_FORMATION_OF_TUBULIN_FOLDING_INTERMEDIATES_BY_CCT_TRIC	-2.1532	0.0313031	0.122249	-1.50441	-2.72199	0.00648908	0.0396555	-2.18782
REACTOME_SIGNALING_BY_FGFR_IN_DISEASE	-2.16827	0.0301382	0.119109	-1.52088	2.96774	0.003	0.0286248	2.52288
REACTOME_DESTABILIZATION_OF_MRNA_BY_KSRP	-2.19469	0.0281859	0.112743	-1.54997	-2.04353	0.041	0.123562	-1.38722
REACTOME_PYRUVATE_METABOLISM_AND_CITRIC_ACID_TCA_CYCLE	-2.19857	0.0279088	0.112316	-1.55426	-3.58131	0.000341874	0.012163	-3.46613
REACTOME_SIGNALING_BY_FGFR	-2.2079	0.0272512	0.110342	-1.56461	2.96774	0.003	0.0286248	2.52288
REACTOME_G_ALPHA_Z_SIGNALLING_EVENTS	-2.21552	0.0267246	0.109554	-1.57309	1.40172	0.161	0.273866	0.793174
REACTOME_P53_DEPENDENT_G1_DNA_DAMAGE_RESPONSE	-2.22083	0.0263627	0.108746	-1.57901	-2.7338	0.00626079	0.0389823	-2.20337
REACTOME_G_ALPHA_I_SIGNALLING_EVENTS	-2.23547	0.0253866	0.105378	-1.5954	1.30176	0.193	0.305468	0.714443
REACTOME_GLYCOSAMINOGLYCAN_METABOLISM	-2.23869	0.0251759	0.105165	-1.59902	2.45726	0.014	0.0650704	1.85387
REACTOME_REGULATION_OF_APOPTOSIS	-2.24222	0.0249471	0.104873	-1.60298	-2.60059	0.00930629	0.0499362	-2.03122
REACTOME_IMMUNE_SYSTEM	-2.25593	0.0240748	0.101855	-1.61844	-0.223688	0.823	0.823	-0.0846002
REACTOME_CA_DEPENDENT_EVENTS	-2.26235	0.0236759	0.100813	-1.62569	1.88079	0.06	0.146125	1.22185
REACTOME_REGULATION_OF_INSULIN_SECRETION	-2.27917	0.0226572	0.0977369	-1.64479	1.66959	0.095	0.195937	1.02228
REACTOME_ANTIGEN_ACTIVATES_B_CELL_RECEPTOR_LEADING_TO_GENERATION_OF_SECOND_MESSENGERS	-2.27976	0.0226222	0.0977369	-1.64547	1.95996	0.05	0.136364	1.30103
REACTOME_FORMATION_OF_INCISION_COMPLEX_IN_GG_NER	-2.29026	0.0220064	0.0961869	-1.65745	-2.07485	0.038	0.12	-1.42022
REACTOME_L1CAM_INTERACTIONS	-2.30034	0.0214291	0.0942882	-1.669	-0.401571	0.688	0.692195	-0.162412
REACTOME_CROSS_PRESENTATION_OF_SOLUBLE_EXOGENOUS_ANTIGENS_ENDOSOMES	-2.30623	0.0210979	0.0934537	-1.67576	-2.63607	0.00838725	0.0481355	-2.07638
REACTOME_REGULATION_OF_ORNITHINE_DECARBOXYLASE_ODC	-2.32562	0.0200388	0.0893624	-1.69813	-2.94041	0.00327781	0.0286248	-2.48442
REACTOME_CHOLESTEROL_BIOSYNTHESIS	-2.32826	0.0198984	0.0893624	-1.70118	-0.56217	0.574	0.592864	-0.241088
REACTOME_AUTODEGRADATION_OF_THE_E3_UBIQUITIN_LIGASE_COP1	-2.34897	0.0188254	0.0856879	-1.72526	-2.92483	0.00344647	0.0286248	-2.46263
REACTOME_GLUCOSE_METABOLISM	-2.3606	0.0182456	0.0836257	-1.73884	-1.22387	0.221	0.333725	-0.655608
REACTOME_PLC_BETA_MEDIATED_EVENTS	-2.36589	0.017987	0.083017	-1.74504	2.29037	0.022	0.0854118	1.65758
REACTOME_NETRIN1_SIGNALING	-2.3717	0.0177067	0.0822986	-1.75186	1.27587	0.202	0.313694	0.694649
REACTOME_SIGNALING_BY_THE_B_CELL_RECEPTOR_BCR	-2.37317	0.0176364	0.0822986	-1.75359	-0.655727	0.512	0.548045	-0.29073
REACTOME_MRNA_DECAY_BY_3_TO_5_EXORIBONUCLEASE	-2.38952	0.0168702	0.0801031	-1.77288	-2.76418	0.00570656	0.0376633	-2.24363
REACTOME_AQUAPORIN_MEDIATED_TRANSPORT	-2.4158	0.0157007	0.0750905	-1.80408	-0.484544	0.628	0.637662	-0.20204
REACTOME_REGULATION_OF_KIT_SIGNALING	-2.43429	0.0149209	0.0718815	-1.82621	1.18758	0.235	0.343142	0.628932
REACTOME_RECEPTOR_LIGAND_BINDING_INITIATES_THE_SECOND_PROTEOLYTIC_CLEAVAGE_OF_NOTCH_RECEPTOR	-2.44299	0.0145662	0.0706888	-1.83665	-1.72238	0.085	0.180968	-1.07058
REACTOME_POST_TRANSLATIONAL_MODIFICATION_SYNTHESIS_OF_GPI_ANCHORED_PROTEINS	-2.44762	0.0143803	0.0703038	-1.84223	-1.59819	0.11	0.214793	-0.958607
REACTOME_METABOLISM_OF_AMINO_ACIDS_AND_DERIVATIVES	-2.47374	0.0133707	0.0658556	-1.87385	-3.38751	0.000705302	0.013097	-3.15162
REACTOME_SIGNALING_BY_EGFR_IN_CANCER	-2.47525	0.0133143	0.0658556	-1.87568	3.09023	0.002	0.024	2.69897
REACTOME_SIGNAL_AMPLIFICATION	-2.47778	0.0132204	0.0658556	-1.87875	-0.753749	0.451	0.502804	-0.345823
REACTOME_GLUCAGON_TYPE_LIGAND_RECEPTORS	-2.48504	0.0129537	0.0652627	-1.88761	-1.69015	0.091	0.190667	-1.04096
REACTOME_GLUCAGON_SIGNALING_IN_METABOLIC_REGULATION	-2.48711	0.0128787	0.0652627	-1.89013	-0.573952	0.566	0.588283	-0.247184
REACTOME_TETRAHYDROBIOPTERIN_BH4_SYNTHESIS_RECYCLING_SALVAGE_AND_REGULATION	-2.5021	0.012346	0.0631658	-1.90847	0.921097	0.357	0.436747	0.447332
REACTOME_G_ALPHA_S_SIGNALLING_EVENTS	-2.51452	0.0119194	0.0619434	-1.92375	-0.948254	0.343	0.432023	-0.464706
REACTOME_VIF_MEDIATED_DEGRADATION_OF_APOBEC3G	-2.51672	0.0118454	0.0619434	-1.92645	-2.98705	0.00281688	0.0281688	-2.55023
REACTOME_REGULATION_OF_INSULIN_SECRETION_BY_GLUCAGON_LIKE_PEPTIDE1	-2.51899	0.0117691	0.0619434	-1.92926	1.00895	0.313	0.412335	0.504456
REACTOME_REGULATION_OF_WATER_BALANCE_BY_RENAL_AQUAPORINS	-2.5209	0.0117055	0.0619434	-1.93161	-0.543189	0.587	0.603458	-0.231362
REACTOME_SCF_BETA_TRCP_MEDIATED_DEGRADATION_OF_EMI1	-2.52445	0.0115881	0.0619434	-1.93599	-2.78814	0.00530114	0.0360752	-2.27563
REACTOME_G_PROTEIN_ACTIVATION	-2.52521	0.0115631	0.0619434	-1.93693	-0.846991	0.397	0.462116	-0.401209
REACTOME_SLBP_DEPENDENT_PROCESSING_OF_REPLICATION_DEPENDENT_HISTONE_PRE_MRNAS	-2.5656	0.0102996	0.056648	-1.98718	-1.25357	0.21	0.323077	-0.677781
REACTOME_ADP_SIGNALLING_THROUGH_P2RY12	-2.56855	0.0102124	0.0566403	-1.99087	-0.972102	0.331	0.420925	-0.480172
REACTOME_THROMBOXANE_SIGNALLING_THROUGH_TP_RECEPTOR	-2.571	0.0101406	0.0566403	-1.99394	-0.988312	0.323	0.420925	-0.490797
REACTOME_AUTODEGRADATION_OF_CDH1_BY_CDH1_APC_C	-2.57855	0.00992155	0.0559677	-2.00342	-2.81351	0.00490032	0.0347765	-2.30978
REACTOME_METABOLISM_OF_LIPIDS_AND_LIPOPROTEINS	-2.5816	0.00983434	0.055954	-2.00725	-1.32251	0.186	0.29971	-0.730487
REACTOME_INTEGRATION_OF_ENERGY_METABOLISM	-2.58721	0.00967561	0.0555296	-2.01432	1.7392	0.082	0.178614	1.08619
REACTOME_ADAPTIVE_IMMUNE_SYSTEM	-2.59355	0.00949915	0.0549951	-2.02232	-0.693493	0.488	0.533245	-0.31158
REACTOME_AMINO_ACID_SYNTHESIS_AND_INTERCONVERSION_TRANSAMINATION	-2.59355	0.00949911	0.0549951	-2.02232	-2.33895	0.0193383	0.0787855	-1.71358
REACTOME_ENOS_ACTIVATION_AND_REGULATION	-2.60684	0.00913811	0.0538496	-2.03914	-0.587303	0.557	0.580758	-0.254145
REACTOME_G1_PHASE	-2.62605	0.00863823	0.0513625	-2.06358	-1.45021	0.147	0.259412	-0.832683
REACTOME_ADP_SIGNALLING_THROUGH_P2RY1	-2.6297	0.00854606	0.0512764	-2.06823	-1.29593	0.195	0.306429	-0.709965
REACTOME_PRE_NOTCH_EXPRESSION_AND_PROCESSING	-2.65734	0.00787605	0.0481314	-2.10369	1.21859	0.223	0.333725	0.651695
REACTOME_MHC_CLASS_II_ANTIGEN_PRESENTATION	-2.6583	0.0078535	0.0481314	-2.10494	-1.52604	0.127	0.23678	-0.896196
REACTOME_SCFSKP2_MEDIATED_DEGRADATION_OF_P27_P21	-2.68615	0.00722812	0.0450053	-2.14097	-2.81705	0.00484672	0.0347699	-2.31455
REACTOME_DESTABILIZATION_OF_MRNA_BY_BRF1	-2.72437	0.0064424	0.0404951	-2.19095	-2.74677	0.00601848	0.038565	-2.22051
REACTOME_SIGNALING_BY_NOTCH	-2.73812	0.00617922	0.0392143	-2.20907	1.34694	0.178	0.291514	0.74958
REACTOME_MRNA_SPLICING_MINOR_PATHWAY	-2.77791	0.005471	0.0350569	-2.26193	-3.28981	0.00100256	0.0152824	-2.99889
REACTOME_APC_C_CDC20_MEDIATED_DEGRADATION_OF_CYCLIN_B	-2.78986	0.00527308	0.0341199	-2.27794	-2.09693	0.036	0.115902	-1.4437
REACTOME_DESTABILIZATION_OF_MRNA_BY_TRISTETRAPROLIN_TTP	-2.79858	0.00513279	0.0339858	-2.28965	-2.38304	0.0171703	0.0740678	-1.76522
REACTOME_CYCLIN_E_ASSOCIATED_EVENTS_DURING_G1_S_TRANSITION_	-2.79971	0.00511482	0.0339858	-2.29117	-2.91887	0.00351304	0.0286248	-2.45432
REACTOME_GLUCONEOGENESIS	-2.81132	0.00493389	0.0335708	-2.30681	-1.09618	0.273	0.373817	-0.563837
REACTOME_P53_INDEPENDENT_G1_S_DNA_DAMAGE_CHECKPOINT	-2.81268	0.00491306	0.0335708	-2.30865	-3.47429	0.000512212	0.012163	-3.29055
REACTOME_MRNA_SPLICING	-2.81563	0.00486818	0.0335708	-2.31263	-3.56478	0.000364164	0.012163	-3.4387
REACTOME_POST_CHAPERONIN_TUBULIN_FOLDING_PATHWAY	-2.82337	0.00475216	0.0333663	-2.32311	-1.31652	0.188	0.29971	-0.725842
REACTOME_PROSTACYCLIN_SIGNALLING_THROUGH_PROSTACYCLIN_RECEPTOR	-2.86444	0.00417752	0.0296469	-2.37908	-1.58927	0.112	0.217412	-0.950782
REACTOME_RECRUITMENT_OF_NUMA_TO_MITOTIC_CENTROSOMES	-2.86854	0.00412375	0.0295834	-2.38471	-1.94313	0.052	0.137831	-1.284
REACTOME_TRANSPORT_OF_MATURE_MRNA_DERIVED_FROM_AN_INTRONLESS_TRANSCRIPT	-2.88185	0.00395351	0.0286738	-2.40302	-2.8295	0.00466205	0.0341884	-2.33142
REACTOME_TRANSPORT_OF_MATURE_TRANSCRIPT_TO_CYTOPLASM	-2.89231	0.00382424	0.0280444	-2.41746	-3.04193	0.00235063	0.0254195	-2.62882
REACTOME_PHOSPHORYLATION_OF_THE_APC_C	-2.89522	0.00378894	0.0280444	-2.42148	-1.83167	0.067	0.159065	-1.17393
REACTOME_G_BETA_GAMMA_SIGNALLING_THROUGH_PI3KGAMMA	-2.9001	0.00373046	0.0279784	-2.42824	-0.97613	0.329	0.420925	-0.482804
REACTOME_RESOLUTION_OF_AP_SITES_VIA_THE_MULTIPLE_NUCLEOTIDE_PATCH_REPLACEMENT_PATHWAY	-2.90078	0.00372232	0.0279784	-2.42919	-1.72793	0.084	0.179417	-1.07572
REACTOME_REGULATION_OF_GLUCOKINASE_BY_GLUCOKINASE_REGULATORY_PROTEIN	-2.90984	0.00361613	0.0277517	-2.44176	-2.7181	0.00656582	0.0397563	-2.18271
REACTOME_HEMOSTASIS	-2.91786	0.00352447	0.0273664	-2.45291	2.43238	0.015	0.0682052	1.82391
REACTOME_GLUCOSE_TRANSPORT	-2.91831	0.00351937	0.0273664	-2.45354	-2.96065	0.00306992	0.0286248	-2.51287
REACTOME_INHIBITION_OF_INSULIN_SECRETION_BY_ADRENALINE_NORADRENALINE	-2.92199	0.00347806	0.0273664	-2.45866	-0.685545	0.493	0.536046	-0.307153
REACTOME_G_PROTEIN_BETA_GAMMA_SIGNALLING	-2.93076	0.00338129	0.0272152	-2.47092	-0.926859	0.354	0.435084	-0.450997
REACTOME_PRE_NOTCH_TRANSCRIPTION_AND_TRANSLATION	-2.93325	0.00335431	0.0272152	-2.4744	-0.972102	0.331	0.420925	-0.480172
REACTOME_APC_C_CDH1_MEDIATED_DEGRADATION_OF_CDC20_AND_OTHER_APC_C_CDH1_TARGETED_PROTEINS_IN_LATE_MITOSIS_EARLY_G1	-2.93604	0.00332432	0.0272152	-2.4783	-3.14335	0.00167025	0.021615	-2.77722
REACTOME_TRANSPORT_OF_RIBONUCLEOPROTEINS_INTO_THE_HOST_NUCLEUS	-2.94319	0.00324847	0.0271391	-2.48832	-2.94278	0.00325281	0.0286248	-2.48774
REACTOME_OPIOID_SIGNALLING	-2.9492	0.003186	0.0269585	-2.49675	1.34076	0.18	0.293333	0.744727
REACTOME_BASE_EXCISION_REPAIR	-2.97168	0.00296171	0.0253861	-2.52846	-2.37054	0.017762	0.0751469	-1.75051
REACTOME_G2_M_DNA_DAMAGE_CHECKPOINT	-2.99633	0.00273252	0.0237297	-2.56344	-0.928786	0.353	0.434664	-0.452225
REACTOME_LOSS_OF_NLP_FROM_MITOTIC_CENTROSOMES	-3.00128	0.00268844	0.0237297	-2.5705	-2.42141	0.0154603	0.0694137	-1.81078
REACTOME_RECYCLING_PATHWAY_OF_L1	-3.00723	0.00263643	0.0237297	-2.57898	-0.541737	0.588	0.603546	-0.230623
REACTOME_MEIOSIS	-3.00837	0.00262656	0.0237297	-2.58061	-0.392079	0.695	0.697112	-0.158015
REACTOME_G_BETA_GAMMA_SIGNALLING_THROUGH_PLC_BETA	-3.01775	0.00254658	0.0236724	-2.59404	-1.39505	0.163	0.274439	-0.787812
REACTOME_APC_CDC20_MEDIATED_DEGRADATION_OF_NEK2A	-3.02073	0.00252169	0.0236724	-2.59831	-1.77438	0.076	0.171781	-1.11919
REACTOME_CDC6_ASSOCIATION_WITH_THE_ORC_ORIGIN_COMPLEX	-3.03925	0.00237169	0.0226857	-2.62494	-2.56668	0.0102677	0.0533596	-1.98853
REACTOME_SYNTHESIS_AND_INTERCONVERSION_OF_NUCLEOTIDE_DI_AND_TRIPHOSPHATES	-3.04879	0.00229761	0.0223004	-2.63872	-2.84639	0.00442174	0.0331631	-2.35441
REACTOME_PYRIMIDINE_METABOLISM	-3.06646	0.00216612	0.0213379	-2.66432	-2.29229	0.0218891	0.0854118	-1.65977
REACTOME_ACTIVATION_OF_KAINATE_RECEPTORS_UPON_GLUTAMATE_BINDING	-3.07164	0.00212886	0.0212886	-2.67185	-1.29015	0.197	0.308104	-0.705534
REACTOME_INTERACTIONS_OF_VPR_WITH_HOST_CELLULAR_PROTEINS	-3.07329	0.00211715	0.0212886	-2.67425	-2.84031	0.00450698	0.0334225	-2.34611
REACTOME_CDK_MEDIATED_PHOSPHORYLATION_AND_REMOVAL_OF_CDC6	-3.0793	0.0020749	0.0212886	-2.683	-2.84719	0.00441074	0.0331631	-2.35549
REACTOME_LATE_PHASE_OF_HIV_LIFE_CYCLE	-3.0844	0.00203965	0.0212886	-2.69044	-3.25035	0.00115265	0.0169055	-2.9383
REACTOME_CDT1_ASSOCIATION_WITH_THE_CDC6_ORC_ORIGIN_COMPLEX	-3.08491	0.00203617	0.0212886	-2.69119	-3.31268	0.000924078	0.0152824	-3.03429
REACTOME_MEIOTIC_RECOMBINATION	-3.11364	0.00184795	0.0203275	-2.73331	-0.614326	0.539	0.566465	-0.268411
REACTOME_RECRUITMENT_OF_MITOTIC_CENTROSOME_PROTEINS_AND_COMPLEXES	-3.11571	0.00183505	0.0203275	-2.73635	-2.52552	0.0115528	0.0577641	-1.93731
REACTOME_METABOLISM_OF_NUCLEOTIDES	-3.11902	0.00181451	0.0203275	-2.74124	-3.57091	0.000355737	0.012163	-3.44887
REACTOME_NEP_NS2_INTERACTS_WITH_THE_CELLULAR_EXPORT_MACHINERY	-3.15568	0.00160123	0.0185405	-2.79555	-3.00852	0.00262522	0.0270726	-2.58083
REACTOME_CYCLIN_A_B1_ASSOCIATED_EVENTS_DURING_G2_M_TRANSITION	-3.1617	0.00156852	0.0184862	-2.80451	-2.11864	0.0341213	0.1126	-1.46697
REACTOME_HIV_LIFE_CYCLE	-3.17875	0.00147912	0.0177495	-2.83	-3.05038	0.00228552	0.0251408	-2.64101
REACTOME_POL_SWITCHING	-3.18884	0.00142845	0.0176451	-2.84514	-2.50738	0.012163	0.0598702	-1.91496
REACTOME_APC_C_CDC20_MEDIATED_DEGRADATION_OF_MITOTIC_PROTEINS	-3.20121	0.00136851	0.0173695	-2.86375	-3.0372	0.00238789	0.0254195	-2.62199
REACTOME_E2F_ENABLED_INHIBITION_OF_PRE_REPLICATION_COMPLEX_FORMATION	-3.23231	0.00122795	0.0158911	-2.91082	-2.56921	0.010193	0.0533596	-1.9917
REACTOME_DEPOSITION_OF_NEW_CENPA_CONTAINING_NUCLEOSOMES_AT_THE_CENTROMERE	-3.2418	0.00118776	0.0156784	-2.92527	-1.31354	0.189	0.300578	-0.723538
REACTOME_ASSOCIATION_OF_LICENSING_FACTORS_WITH_THE_PRE_REPLICATIVE_COMPLEX	-3.25332	0.00114065	0.0153638	-2.94285	-2.99338	0.00275907	0.0280152	-2.55924
REACTOME_KINESINS	-3.25731	0.00112473	0.0153638	-2.94895	-1.17249	0.241	0.349582	-0.617983
REACTOME_HOST_INTERACTIONS_OF_HIV_FACTORS	-3.29672	0.000978198	0.0137364	-3.00957	-3.4829	0.00049602	0.012163	-3.3045
REACTOME_DOUBLE_STRAND_BREAK_REPAIR	-3.29871	0.000971303	0.0137364	-3.01265	-1.45742	0.145	0.257258	-0.838632
REACTOME_INHIBITION_OF_THE_PROTEOLYTIC_ACTIVITY_OF_APC_C_REQUIRED_FOR_THE_ONSET_OF_ANAPHASE_BY_MITOTIC_SPINDLE_CHECKPOINT_COMPONENTS	-3.32139	0.000895691	0.0131368	-3.04784	-1.8957	0.058	0.14391	-1.23657
REACTOME_HOMOLOGOUS_RECOMBINATION_REPAIR_OF_REPLICATION_INDEPENDENT_DOUBLE_STRAND_BREAKS	-3.32486	0.000884637	0.0131368	-3.05323	-1.92684	0.054	0.14087	-1.26761
REACTOME_PROCESSING_OF_CAPPED_INTRON_CONTAINING_PRE_MRNA	-3.33519	0.000852414	0.0130836	-3.06935	-3.59307	0.000326804	0.012163	-3.48571
REACTOME_REMOVAL_OF_THE_FLAP_INTERMEDIATE_FROM_THE_C_STRAND	-3.33801	0.000843819	0.0130836	-3.07375	-1.29015	0.197	0.308104	-0.705534
REACTOME_FANCONI_ANEMIA_PATHWAY	-3.34962	0.000809214	0.0130836	-3.09194	-2.32519	0.0200616	0.0807358	-1.69763
REACTOME_METABOLISM_OF_NON_CODING_RNA	-3.35903	0.00078217	0.0130836	-3.1067	-3.51693	0.000436568	0.012163	-3.35995
REACTOME_FACTORS_INVOLVED_IN_MEGAKARYOCYTE_DEVELOPMENT_AND_PLATELET_PRODUCTION	-3.36405	0.000768071	0.0130836	-3.1146	-1.24264	0.214	0.326189	-0.669586
REACTOME_REPAIR_SYNTHESIS_FOR_GAP_FILLING_BY_DNA_POL_IN_TC_NER	-3.3885	0.000702759	0.0125357	-3.15319	-2.34739	0.0189053	0.0778882	-1.72342
REACTOME_ORC1_REMOVAL_FROM_CHROMATIN	-3.40454	0.000662768	0.0121507	-3.17864	-3.17011	0.00152384	0.0202092	-2.81706
REACTOME_METABOLISM_OF_CARBOHYDRATES	-3.41525	0.00063723	0.0120163	-3.1957	-1.10306	0.27	0.373585	-0.568636
REACTOME_MITOTIC_G2_G2_M_PHASES	-3.43345	0.000595942	0.0115683	-3.2248	-3.1084	0.00188103	0.0234241	-2.72561
REACTOME_REGULATION_OF_MITOTIC_CELL_CYCLE	-3.45892	0.000542346	0.0108469	-3.26572	-3.12913	0.00175322	0.0222524	-2.75616
REACTOME_UNWINDING_OF_DNA	-3.46956	0.000521309	0.010752	-3.2829	-1.76836	0.077	0.173447	-1.11351
REACTOME_HIV_INFECTION	-3.49509	0.000473895	0.0100894	-3.32432	-3.3904	0.000697909	0.013097	-3.1562
REACTOME_G0_AND_EARLY_G1	-3.50363	0.000458956	0.0100894	-3.33823	-2.93384	0.00334796	0.0286248	-2.47522
REACTOME_TRANSCRIPTION_COUPLED_NER_TC_NER	-3.51451	0.000440562	0.0100266	-3.35599	-3.07377	0.00211374	0.0240529	-2.67495
REACTOME_MRNA_PROCESSING	-3.51616	0.000437833	0.0100266	-3.35869	-3.71433	0.000203741	0.012163	-3.69092
REACTOME_INHIBITION_OF_REPLICATION_INITIATION_OF_DAMAGED_DNA_BY_RB1_E2F1	-3.52776	0.000419085	0.0100266	-3.3777	-1.46838	0.142	0.255368	-0.847712
REACTOME_NUCLEOTIDE_EXCISION_REPAIR	-3.58099	0.000342294	0.008689	-3.4656	-2.9597	0.00307936	0.0286248	-2.51154
REACTOME_ASSEMBLY_OF_THE_PRE_REPLICATIVE_COMPLEX	-3.68953	0.000224669	0.00593126	-3.64846	-3.45402	0.00055229	0.012163	-3.25783
REACTOME_ACTIVATION_OF_THE_PRE_REPLICATIVE_COMPLEX	-3.69003	0.000224229	0.00593126	-3.64931	-3.37646	0.000734251	0.0130974	-3.13416
REACTOME_PROCESSIVE_SYNTHESIS_ON_THE_LAGGING_STRAND	-3.69349	0.000221196	0.00593126	-3.65522	-1.7392	0.082	0.178614	-1.08619
REACTOME_GLOBAL_GENOMIC_NER_GG_NER	-3.70883	0.000208219	0.00593126	-3.68148	-2.73914	0.0061601	0.0387206	-2.21041
REACTOME_E2F_MEDIATED_REGULATION_OF_DNA_REPLICATION	-3.71535	0.000202926	0.00593126	-3.69266	-3.2105	0.00132502	0.0186067	-2.87778
REACTOME_G1_S_SPECIFIC_TRANSCRIPTION	-3.79026	0.000150487	0.00496606	-3.8225	-3.19656	0.00139077	0.019123	-2.85675
REACTOME_ACTIVATION_OF_ATR_IN_RESPONSE_TO_REPLICATION_STRESS	-3.79777	0.000146005	0.00496606	-3.83563	-3.384	0.000714383	0.013097	-3.14607
REACTOME_CHROMOSOME_MAINTENANCE	-3.80131	0.000143933	0.00496606	-3.84184	-1.79912	0.072	0.166154	-1.14267
REACTOME_TELOMERE_MAINTENANCE	-3.81143	0.000138168	0.00496606	-3.85959	-1.81191	0.07	0.16383	-1.1549
REACTOME_MITOTIC_PROMETAPHASE	-3.82171	0.000132531	0.00496606	-3.87768	-1.8663	0.062	0.149343	-1.20761
REACTOME_LAGGING_STRAND_SYNTHESIS	-3.83987	0.000123101	0.00496606	-3.90974	-2.24893	0.024517	0.0914195	-1.61053
REACTOME_EXTENSION_OF_TELOMERES	-3.90845	9.28913e-05	0.00437916	-4.03202	-3.06745	0.00215894	0.0241509	-2.66576
REACTOME_M_G1_TRANSITION	-3.9295	8.51213e-05	0.00432154	-4.06996	-3.39466	0.000687144	0.013097	-3.16295
REACTOME_DNA_REPAIR	-3.9418	8.08726e-05	0.00432154	-4.0922	-3.46785	0.00052464	0.012163	-3.28014
REACTOME_G1_S_TRANSITION	-3.94464	7.99208e-05	0.00432154	-4.09734	-3.69133	0.000223086	0.012163	-3.65153
REACTOME_DNA_STRAND_ELONGATION	-3.96333	7.391e-05	0.00432154	-4.1313	-2.79828	0.00513756	0.0356925	-2.28924
REACTOME_CELL_CYCLE_CHECKPOINTS	-3.96412	7.36663e-05	0.00432154	-4.13273	-3.44546	0.000570083	0.012163	-3.24406
REACTOME_G2_M_CHECKPOINTS	-4.04881	5.14789e-05	0.00424701	-4.28837	-3.28528	0.00101883	0.0152824	-2.9919
REACTOME_S_PHASE	-4.08248	4.45573e-05	0.00420112	-4.35108	-3.63723	0.00027559	0.012163	-3.55974
REACTOME_MITOTIC_G1_G1_S_PHASES	-4.08993	4.31512e-05	0.00420112	-4.36501	-3.44502	0.000571025	0.012163	-3.24334
REACTOME_SYNTHESIS_OF_DNA	-4.1827	2.88072e-05	0.00380255	-4.5405	-3.16874	0.001531	0.0202092	-2.81502
REACTOME_MITOTIC_M_M_G1_PHASES	-4.3904	1.13142e-05	0.00186684	-4.94638	-3.49409	0.000475687	0.012163	-3.32268
REACTOME_DNA_REPLICATION	-4.60567	4.11143e-06	0.000904514	-5.38601	-3.56618	0.000362217	0.012163	-3.44103
REACTOME_CELL_CYCLE_MITOTIC	-4.7902	1.66617e-06	0.000549836	-5.77828	-3.88909	0.000100621	0.012163	-3.99731
REACTOME_CELL_CYCLE	-4.81735	1.45474e-06	0.000549836	-5.83721	-3.79187	0.00014952	0.012163	-3.8253

## Sheet: KEGG
	shTEAD4 vs. control				shMYCN vs. control
	NES	p-value	FDR	log10P(+-)	NES	p-value	FDR	log10P(+-)
KEGG_RIBOSOME	3.12952	0.00175094	0.0271396	2.75673	-3.58263	0.000340156	0.0232135	-3.46832
KEGG_MAPK_SIGNALING_PATHWAY	2.69684	0.007	0.0566087	2.1549	2.69684	0.007	0.056608	2.1549
KEGG_SNARE_INTERACTIONS_IN_VESICULAR_TRANSPORT	2.29037	0.022	0.127875	1.65758	1.72238	0.085	0.215368	1.07058
KEGG_GLYCOSPHINGOLIPID_BIOSYNTHESIS_LACTO_AND_NEOLACTO_SERIES	2.21152	0.027	0.143486	1.56864	1.43953	0.15	0.279921	0.823909
KEGG_LYSOSOME	2.18349	0.029	0.145784	1.5376	1.95148	0.051	0.169393	1.29243
KEGG_TYPE_I_DIABETES_MELLITUS	2.12007	0.034	0.154244	1.46852	-1.33462	0.182	0.313444	-0.739929
KEGG_MTOR_SIGNALING_PATHWAY	2.12007	0.034	0.154244	1.46852	1.32251	0.186	0.314509	0.730487
KEGG_CARDIAC_MUSCLE_CONTRACTION	2.07485	0.038	0.168286	1.42022	-0.507221	0.612	0.622033	-0.213249
KEGG_CYTOKINE_CYTOKINE_RECEPTOR_INTERACTION	1.97737	0.048	0.189957	1.31876	-0.801227	0.423	0.491737	-0.37366
KEGG_RETINOL_METABOLISM	1.97737	0.048	0.189957	1.31876	-0.628006	0.53	0.56869	-0.275724
KEGG_COMPLEMENT_AND_COAGULATION_CASCADES	1.74491	0.081	0.259759	1.09151	-0.543189	0.587	0.609955	-0.231362
KEGG_CYTOSOLIC_DNA_SENSING_PATHWAY	1.68494	0.092	0.266123	1.03621	0.998576	0.318	0.410219	0.497573
KEGG_HYPERTROPHIC_CARDIOMYOPATHY_HCM	1.65957	0.097	0.273364	1.01323	1.45381	0.146	0.279921	0.835647
KEGG_PORPHYRIN_AND_CHLOROPHYLL_METABOLISM	1.51806	0.129	0.324243	0.88941	-1.97523	0.0482418	0.165709	-1.31658
KEGG_STARCH_AND_SUCROSE_METABOLISM	1.45742	0.145	0.354868	0.838632	-0.802956	0.422	0.491737	-0.374688
KEGG_INOSITOL_PHOSPHATE_METABOLISM	1.37542	0.169	0.390146	0.772113	-0.699884	0.484	0.5456	-0.315155
KEGG_ADHERENS_JUNCTION	1.31652	0.188	0.406605	0.725842	2.5147	0.0119135	0.0765882	1.92396
KEGG_RIG_I_LIKE_RECEPTOR_SIGNALING_PATHWAY	1.29015	0.197	0.410413	0.705534	1.05593	0.291	0.390734	0.536107
KEGG_FC_GAMMA_R_MEDIATED_PHAGOCYTOSIS	1.28155	0.2	0.410413	0.69897	2.61205	0.009	0.062	2.04576
KEGG_VEGF_SIGNALING_PATHWAY	1.27871	0.201	0.410413	0.696804	-0.488776	0.625	0.631793	-0.20412
KEGG_CIRCADIAN_RHYTHM_MAMMAL	1.27305	0.203	0.410413	0.692504	0.998576	0.318	0.410219	0.497573
KEGG_ABC_TRANSPORTERS	1.26464	0.206	0.412	0.686133	-1.46471	0.143	0.279921	-0.844664
KEGG_ARACHIDONIC_ACID_METABOLISM	1.25632	0.209	0.413553	0.679854	-2.75658	0.00584085	0.0517333	-2.23352
KEGG_TOLL_LIKE_RECEPTOR_SIGNALING_PATHWAY	1.24264	0.214	0.418989	0.669586	2.45726	0.014	0.0765882	1.85387
KEGG_PRIMARY_IMMUNODEFICIENCY	1.23454	0.217	0.420438	0.66354	-1.77438	0.076	0.207565	-1.11919
KEGG_ANTIGEN_PROCESSING_AND_PRESENTATION	1.19012	0.234	0.426175	0.630784	-1.29015	0.197	0.327161	-0.705534
KEGG_STEROID_HORMONE_BIOSYNTHESIS	1.18504	0.236	0.426175	0.627088	-2.17038	0.0299784	0.119214	-1.52319
KEGG_METABOLISM_OF_XENOBIOTICS_BY_CYTOCHROME_P450	1.12168	0.262	0.464162	0.581699	-2.19041	0.0284944	0.117777	-1.54524
KEGG_ALDOSTERONE_REGULATED_SODIUM_REABSORPTION	1.08708	0.277	0.464162	0.55752	1.92684	0.054	0.170237	1.26761
KEGG_GRAFT_VERSUS_HOST_DISEASE	1.06252	0.288	0.465809	0.540608	-1.19522	0.232	0.356628	-0.634512
KEGG_PANTOTHENATE_AND_COA_BIOSYNTHESIS	1.06252	0.288	0.465809	0.540608	-0.651072	0.515	0.563471	-0.288193
KEGG_REGULATION_OF_AUTOPHAGY	1.01943	0.308	0.48114	0.511449	-0.924934	0.355	0.437285	-0.449772
KEGG_AMINO_SUGAR_AND_NUCLEOTIDE_SUGAR_METABOLISM	1.01943	0.308	0.48114	0.511449	1.01943	0.308	0.407366	0.511449
KEGG_O_GLYCAN_BIOSYNTHESIS	1.01103	0.312	0.48114	0.505845	1.64972	0.099	0.230175	1.00436
KEGG_OTHER_GLYCAN_DEGRADATION	1.00064	0.317	0.48239	0.498941	-1.34076	0.18	0.312897	-0.744727
KEGG_VALINE_LEUCINE_AND_ISOLEUCINE_BIOSYNTHESIS	0.980174	0.327	0.4905	0.485452	-2.61799	0.00884487	0.062	-2.05331
KEGG_BETA_ALANINE_METABOLISM	0.958124	0.338	0.495024	0.471083	-0.628006	0.53	0.56869	-0.275724
KEGG_LINOLEIC_ACID_METABOLISM	0.909663	0.363	0.505254	0.440093	-0.624956	0.532	0.56869	-0.274088
KEGG_CALCIUM_SIGNALING_PATHWAY	-0.224973	0.822	0.822	-0.0851282	1.62108	0.105	0.241111	0.978811
KEGG_TGF_BETA_SIGNALING_PATHWAY	-0.306794	0.759	0.763103	-0.119758	-0.61584	0.538	0.571817	-0.269218
KEGG_OXIDATIVE_PHOSPHORYLATION	-0.365149	0.715	0.722772	-0.145694	-2.71519	0.00662377	0.0560009	-2.17889
KEGG_PHOSPHATIDYLINOSITOL_SIGNALING_SYSTEM	-0.365149	0.715	0.722772	-0.145694	1.6954	0.09	0.217403	1.04576
KEGG_B_CELL_RECEPTOR_SIGNALING_PATHWAY	-0.420665	0.674	0.688813	-0.17134	1.06694	0.286	0.38965	0.543634
KEGG_HUNTINGTONS_DISEASE	-0.426148	0.67	0.688508	-0.173925	-3.08983	0.00200269	0.0293341	-2.69839
KEGG_N_GLYCAN_BIOSYNTHESIS	-0.426148	0.67	0.688508	-0.173925	-1.14792	0.251	0.373488	-0.600326
KEGG_ARRHYTHMOGENIC_RIGHT_VENTRICULAR_CARDIOMYOPATHY_ARVC	-0.448212	0.654	0.679575	-0.184422	2.80703	0.005	0.0465	2.30103
KEGG_ADIPOCYTOKINE_SIGNALING_PATHWAY	-0.450985	0.652	0.679575	-0.185752	-1.10537	0.269	0.379045	-0.570248
KEGG_NOD_LIKE_RECEPTOR_SIGNALING_PATHWAY	-0.456542	0.648	0.679575	-0.188425	-0.52872	0.597	0.610121	-0.224026
KEGG_HEMATOPOIETIC_CELL_LINEAGE	-0.470497	0.638	0.67425	-0.195179	-1.11465	0.265	0.379045	-0.576754
KEGG_RNA_POLYMERASE	-0.48032	0.631	0.670663	-0.199971	-1.92684	0.054	0.170237	-1.26761
KEGG_VIBRIO_CHOLERAE_INFECTION	-0.488776	0.625	0.668103	-0.20412	1.36581	0.172	0.307615	0.764472
KEGG_JAK_STAT_SIGNALING_PATHWAY	-0.504372	0.614	0.660139	-0.211832	2.91498	0.00355713	0.0440334	2.4489
KEGG_TYPE_II_DIABETES_MELLITUS	-0.53594	0.592	0.640186	-0.227678	1.32251	0.186	0.314509	0.730487
KEGG_REGULATION_OF_ACTIN_CYTOSKELETON	-0.543189	0.587	0.638491	-0.231362	2.12007	0.034	0.12648	1.46852
KEGG_FRUCTOSE_AND_MANNOSE_METABOLISM	-0.568051	0.57	0.623647	-0.244125	-2.92297	0.00346707	0.0440334	-2.46004
KEGG_DRUG_METABOLISM_CYTOCHROME_P450	-0.591777	0.554	0.609728	-0.25649	-1.73354	0.083	0.214417	-1.08092
KEGG_SELENOAMINO_ACID_METABOLISM	-0.605269	0.545	0.603393	-0.263603	-1.96859	0.049	0.165709	-1.3098
KEGG_FC_EPSILON_RI_SIGNALING_PATHWAY	-0.609791	0.542	0.603393	-0.266001	1.83167	0.067	0.19781	1.17393
KEGG_PEROXISOME	-0.61584	0.538	0.602819	-0.269218	-2.46692	0.013628	0.0765882	-1.86557
KEGG_NATURAL_KILLER_CELL_MEDIATED_CYTOTOXICITY	-0.624956	0.532	0.599709	-0.274088	-0.632592	0.527	0.56869	-0.278189
KEGG_PROTEIN_EXPORT	-0.657281	0.511	0.579549	-0.291579	-0.560703	0.575	0.604237	-0.240332
KEGG_TIGHT_JUNCTION	-0.663516	0.507	0.57854	-0.294992	-0.609791	0.542	0.572795	-0.266001
KEGG_DILATED_CARDIOMYOPATHY	-0.688719	0.491	0.563741	-0.308919	1.0939	0.274	0.383188	0.562249
KEGG_RENAL_CELL_CARCINOMA	-0.693493	0.488	0.563741	-0.31158	1.70604	0.088	0.215368	1.05552
KEGG_ALPHA_LINOLENIC_ACID_METABOLISM	-0.698283	0.485	0.563741	-0.314258	1.13829	0.255	0.374884	0.59346
KEGG_MATURITY_ONSET_DIABETES_OF_THE_YOUNG	-0.714367	0.475	0.55566	-0.323306	-1.20036	0.23	0.3565	-0.638272
KEGG_BASAL_TRANSCRIPTION_FACTORS	-0.719229	0.472	0.555646	-0.326058	-1.25357	0.21	0.336724	-0.677781
KEGG_AMINOACYL_TRNA_BIOSYNTHESIS	-0.720853	0.471	0.555646	-0.326979	-3.36719	0.000759388	0.0232135	-3.11954
KEGG_VIRAL_MYOCARDITIS	-0.725737	0.468	0.555646	-0.329754	-0.890868	0.373	0.456434	-0.428291
KEGG_T_CELL_RECEPTOR_SIGNALING_PATHWAY	-0.738847	0.46	0.552	-0.337242	1.55898	0.119	0.251523	0.924453
KEGG_GLYCOSAMINOGLYCAN_BIOSYNTHESIS_KERATAN_SULFATE	-0.74545	0.456	0.550753	-0.341035	1.58485	0.113	0.250214	0.946922
KEGG_APOPTOSIS	-0.757083	0.449	0.545843	-0.347754	-1.16752	0.243	0.3645	-0.614394
KEGG_DORSO_VENTRAL_AXIS_FORMATION	-0.763777	0.445	0.544539	-0.35164	1.55059	0.121	0.252876	0.917215
KEGG_GLYCEROPHOSPHOLIPID_METABOLISM	-0.777269	0.437	0.538291	-0.359519	-1.25908	0.208	0.336417	-0.681937
KEGG_TAURINE_AND_HYPOTAURINE_METABOLISM	-0.799501	0.424	0.52576	-0.372634	-0.712751	0.476	0.543166	-0.322393
KEGG_VASOPRESSIN_REGULATED_WATER_REABSORPTION	-0.808157	0.419	0.523047	-0.377786	-0.688719	0.491	0.550157	-0.308919
KEGG_TYROSINE_METABOLISM	-0.816875	0.414	0.520297	-0.383	-2.41848	0.0155856	0.0804324	-1.80728
KEGG_NICOTINATE_AND_NICOTINAMIDE_METABOLISM	-0.818626	0.413	0.520297	-0.38405	-1.44307	0.149	0.279921	-0.826814
KEGG_FOCAL_ADHESION	-0.827418	0.408	0.519781	-0.38934	2.32635	0.02	0.0907317	1.69897
KEGG_EPITHELIAL_CELL_SIGNALING_IN_HELICOBACTER_PYLORI_INFECTION	-0.832725	0.405	0.519517	-0.392545	1.43953	0.15	0.279921	0.823909
KEGG_GALACTOSE_METABOLISM	-0.839837	0.401	0.517958	-0.396856	-1.08257	0.279	0.385778	-0.554396
KEGG_NON_HOMOLOGOUS_END_JOINING	-0.845199	0.398	0.517678	-0.400117	1.65463	0.098	0.230175	1.00877
KEGG_GLYCOSPHINGOLIPID_BIOSYNTHESIS_GANGLIO_SERIES	-0.845199	0.398	0.517678	-0.400117	2.38269	0.0171867	0.0841243	1.76481
KEGG_DRUG_METABOLISM_OTHER_ENZYMES	-0.846991	0.397	0.517678	-0.401209	-2.4302	0.0150907	0.0801963	-1.82129
KEGG_LEISHMANIA_INFECTION	-0.850585	0.395	0.517678	-0.403403	-0.530161	0.596	0.610121	-0.224754
KEGG_ECM_RECEPTOR_INTERACTION	-0.852386	0.394	0.517678	-0.404504	2.36562	0.018	0.0858462	1.74473
KEGG_SYSTEMIC_LUPUS_ERYTHEMATOSUS	-0.857805	0.391	0.517678	-0.407823	-0.671346	0.502	0.555786	-0.299296
KEGG_AUTOIMMUNE_THYROID_DISEASE	-0.889006	0.374	0.507766	-0.427128	-1.22653	0.22	0.34678	-0.657577
KEGG_PROPANOATE_METABOLISM	-0.894602	0.371	0.507397	-0.430626	-1.01313	0.311	0.407366	-0.50724
KEGG_AMYOTROPHIC_LATERAL_SCLEROSIS_ALS	-0.900226	0.368	0.507022	-0.434152	-1.18252	0.237	0.359902	-0.625252
KEGG_ALZHEIMERS_DISEASE	-0.90777	0.364	0.505254	-0.438899	-1.90331	0.057	0.1767	-1.24413
KEGG_ALANINE_ASPARTATE_AND_GLUTAMATE_METABOLISM	-0.909663	0.363	0.505254	-0.440093	-0.87055	0.384	0.465	-0.415669
KEGG_ERBB_SIGNALING_PATHWAY	-0.911561	0.362	0.505254	-0.441291	2.48377	0.013	0.0765882	1.88606
KEGG_PENTOSE_AND_GLUCURONATE_INTERCONVERSIONS	-0.917272	0.359	0.505254	-0.444906	-1.10768	0.268	0.379045	-0.571865
KEGG_LEUKOCYTE_TRANSENDOTHELIAL_MIGRATION	-0.919183	0.358	0.505254	-0.446117	-0.936531	0.349	0.43276	-0.457175
KEGG_PPAR_SIGNALING_PATHWAY	-0.946291	0.344	0.499875	-0.463442	0.990356	0.322	0.410219	0.492144
KEGG_PARKINSONS_DISEASE	-0.966088	0.334	0.493048	-0.476254	-3.08286	0.00205023	0.0293341	-2.6882
KEGG_RENIN_ANGIOTENSIN_SYSTEM	-0.966088	0.334	0.493048	-0.476254	-0.801227	0.423	0.491737	-0.37366
KEGG_OLFACTORY_TRANSDUCTION	-0.996515	0.319	0.48239	-0.496209	-1.56749	0.117	0.251523	-0.931814
KEGG_ALLOGRAFT_REJECTION	-1.00895	0.313	0.48114	-0.504456	-1.46106	0.144	0.279921	-0.841638
KEGG_BIOSYNTHESIS_OF_UNSATURATED_FATTY_ACIDS	-1.03429	0.301	0.478513	-0.521434	-1.12876	0.259	0.374884	-0.5867
KEGG_GLYCOSAMINOGLYCAN_BIOSYNTHESIS_CHONDROITIN_SULFATE	-1.03429	0.301	0.478513	-0.521434	-0.531604	0.595	0.610121	-0.225483
KEGG_CELL_ADHESION_MOLECULES_CAMS	-1.06473	0.287	0.465809	-0.542118	1.71689	0.086	0.215368	1.0655
KEGG_ETHER_LIPID_METABOLISM	-1.08032	0.28	0.465	-0.552842	-1.06473	0.287	0.38965	-0.542118
KEGG_PATHOGENIC_ESCHERICHIA_COLI_INFECTION	-1.08935	0.276	0.464162	-0.559091	-0.554846	0.579	0.605022	-0.237321
KEGG_HEDGEHOG_SIGNALING_PATHWAY	-1.09162	0.275	0.464162	-0.560667	-1.27305	0.203	0.331211	-0.692504
KEGG_PHENYLALANINE_METABOLISM	-1.0939	0.274	0.464162	-0.562249	-1.42554	0.154	0.280824	-0.812479
KEGG_INSULIN_SIGNALING_PATHWAY	-1.09847	0.272	0.464162	-0.565431	1.70604	0.088	0.215368	1.05552
KEGG_ASTHMA	-1.10306	0.27	0.464162	-0.568636	-1.78046	0.075	0.207565	-1.12494
KEGG_VALINE_LEUCINE_AND_ISOLEUCINE_DEGRADATION	-1.11699	0.264	0.464162	-0.578396	-1.68494	0.092	0.219385	-1.03621
KEGG_PENTOSE_PHOSPHATE_PATHWAY	-1.19267	0.233	0.426175	-0.632644	-2.87623	0.00402456	0.0440334	-2.39528
KEGG_TASTE_TRANSDUCTION	-1.19779	0.231	0.426175	-0.636388	-2.61232	0.00899292	0.062	-2.0461
KEGG_HISTIDINE_METABOLISM	-1.20036	0.23	0.426175	-0.638272	-1.58927	0.112	0.250214	-0.950782
KEGG_SPHINGOLIPID_METABOLISM	-1.20036	0.23	0.426175	-0.638272	1.59819	0.11	0.249512	0.958607
KEGG_LONG_TERM_POTENTIATION	-1.22387	0.221	0.423773	-0.655608	-0.455152	0.649	0.652508	-0.187755
KEGG_RIBOFLAVIN_METABOLISM	-1.29593	0.195	0.410413	-0.709965	-1.35631	0.175	0.31	-0.756962
KEGG_GLYCINE_SERINE_AND_THREONINE_METABOLISM	-1.30469	0.192	0.410413	-0.716699	-1.8957	0.058	0.176852	-1.23657
KEGG_PRIMARY_BILE_ACID_BIOSYNTHESIS	-1.31951	0.187	0.406605	-0.728158	-1.77438	0.076	0.207565	-1.11919
KEGG_NOTCH_SIGNALING_PATHWAY	-1.33157	0.183	0.405214	-0.737549	-0.952191	0.341	0.425678	-0.467246
KEGG_NEUROACTIVE_LIGAND_RECEPTOR_INTERACTION	-1.33768	0.181	0.405214	-0.742321	1.56322	0.118	0.251523	0.928118
KEGG_GLYOXYLATE_AND_DICARBOXYLATE_METABOLISM	-1.36581	0.172	0.390146	-0.764472	-2.49875	0.0124633	0.0765882	-1.90437
KEGG_PRION_DISEASES	-1.3722	0.17	0.390146	-0.769551	-0.657281	0.511	0.562402	-0.291579
KEGG_GLYCOSPHINGOLIPID_BIOSYNTHESIS_GLOBO_SERIES	-1.40844	0.159	0.374354	-0.798603	-0.703089	0.482	0.5456	-0.316953
KEGG_ENDOCYTOSIS	-1.4325	0.152	0.362462	-0.818156	-0.680797	0.496	0.552431	-0.304518
KEGG_COLORECTAL_CANCER	-1.44663	0.148	0.357506	-0.829738	1.34384	0.179	0.312897	0.747147
KEGG_LONG_TERM_DEPRESSION	-1.47208	0.141	0.34968	-0.850781	2.29037	0.022	0.0974286	1.65758
KEGG_NEUROTROPHIN_SIGNALING_PATHWAY	-1.52204	0.128	0.324243	-0.89279	1.23454	0.217	0.344974	0.66354
KEGG_GLYCEROLIPID_METABOLISM	-1.53007	0.126	0.324243	-0.899629	-1.27871	0.201	0.33085	-0.696804
KEGG_ENDOMETRIAL_CANCER	-1.6027	0.109	0.285549	-0.962574	2.45726	0.014	0.0765882	1.85387
KEGG_BASAL_CELL_CARCINOMA	-1.61183	0.107	0.284314	-0.970616	1.4325	0.152	0.279921	0.818156
KEGG_INTESTINAL_IMMUNE_NETWORK_FOR_IGA_PRODUCTION	-1.62576	0.104	0.280348	-0.982967	-1.57611	0.115	0.251523	-0.939302
KEGG_AXON_GUIDANCE	-1.64485	0.1	0.273529	-1	2.48377	0.013	0.0765882	1.88606
KEGG_ACUTE_MYELOID_LEUKEMIA	-1.64972	0.099	0.273529	-1.00436	1.5423	0.123	0.253451	0.910095
KEGG_GLYCOLYSIS_GLUCONEOGENESIS	-1.67978	0.093	0.266123	-1.03152	-1.73354	0.083	0.214417	-1.08092
KEGG_ONE_CARBON_POOL_BY_FOLATE	-1.68494	0.092	0.266123	-1.03621	-2.68264	0.00730425	0.056608	-2.13642
KEGG_TERPENOID_BACKBONE_BIOSYNTHESIS	-1.68494	0.092	0.266123	-1.03621	-0.984235	0.325	0.411224	-0.488117
KEGG_TRYPTOPHAN_METABOLISM	-1.6954	0.09	0.266123	-1.04576	-1.85919	0.063	0.189	-1.20066
KEGG_STEROID_BIOSYNTHESIS	-1.6954	0.09	0.266123	-1.04576	0.974114	0.33	0.41473	0.481486
KEGG_CHRONIC_MYELOID_LEUKEMIA	-1.71689	0.086	0.266123	-1.0655	1.21596	0.224	0.350118	0.649752
KEGG_VASCULAR_SMOOTH_MUSCLE_CONTRACTION	-1.78046	0.075	0.244737	-1.12494	3.09023	0.002	0.0293341	2.69897
KEGG_GLYCOSAMINOGLYCAN_BIOSYNTHESIS_HEPARAN_SULFATE	-1.79283	0.073	0.242464	-1.13668	2.12007	0.034	0.12648	1.46852
KEGG_GLYCOSAMINOGLYCAN_DEGRADATION	-1.79912	0.072	0.242464	-1.14267	1.5382	0.124	0.253451	0.906578
KEGG_ARGININE_AND_PROLINE_METABOLISM	-1.81191	0.07	0.241111	-1.1549	-2.2148	0.0267741	0.113181	-1.57229
KEGG_GLUTATHIONE_METABOLISM	-1.81842	0.069	0.241111	-1.16115	-3.17697	0.0014882	0.0290615	-2.82734
KEGG_FATTY_ACID_METABOLISM	-1.88079	0.06	0.214615	-1.22185	-0.811637	0.417	0.491737	-0.379864
KEGG_PROXIMAL_TUBULE_BICARBONATE_RECLAMATION	-1.88079	0.06	0.214615	-1.22185	-1.12639	0.26	0.374884	-0.585027
KEGG_GNRH_SIGNALING_PATHWAY	-1.88819	0.059	0.214615	-1.22915	2.04353	0.041	0.146654	1.38722
KEGG_THYROID_CANCER	-1.90331	0.057	0.214615	-1.24413	-0.868721	0.385	0.465	-0.414539
KEGG_UBIQUITIN_MEDIATED_PROTEOLYSIS	-1.95148	0.051	0.197625	-1.29243	-0.735558	0.462	0.530444	-0.335358
KEGG_BUTANOATE_METABOLISM	-1.97737	0.048	0.189957	-1.31876	-1.52604	0.127	0.256761	-0.896196
KEGG_SULFUR_METABOLISM	-1.9863	0.047	0.189957	-1.3279	-1.40507	0.16	0.288932	-0.79588
KEGG_CHEMOKINE_SIGNALING_PATHWAY	-2.03367	0.0419854	0.181611	-1.3769	-1.01522	0.31	0.407366	-0.508638
KEGG_GLYCOSYLPHOSPHATIDYLINOSITOL_GPI_ANCHOR_BIOSYNTHESIS	-2.14127	0.0322526	0.15382	-1.49144	-1.92684	0.054	0.170237	-1.26761
KEGG_ASCORBATE_AND_ALDARATE_METABOLISM	-2.16919	0.0300684	0.147177	-1.52189	0.830953	0.406	0.484077	0.391474
KEGG_WNT_SIGNALING_PATHWAY	-2.19768	0.0279723	0.144523	-1.55327	1.81842	0.069	0.200531	1.16115
KEGG_LIMONENE_AND_PINENE_DEGRADATION	-2.22315	0.0262055	0.14336	-1.58161	-1.05374	0.292	0.390734	-0.534617
KEGG_SMALL_CELL_LUNG_CANCER	-2.259	0.0238836	0.134617	-1.6219	-0.753749	0.451	0.521031	-0.345823
KEGG_GLIOMA	-2.3339	0.0196007	0.117604	-1.70773	1.77438	0.076	0.207565	1.11919
KEGG_MELANOMA	-2.34345	0.0191065	0.117604	-1.71882	1.49851	0.134	0.268	0.872895
KEGG_CYSTEINE_AND_METHIONINE_METABOLISM	-2.34698	0.0189261	0.117604	-1.72294	-1.99539	0.046	0.161434	-1.33724
KEGG_RNA_DEGRADATION	-2.38302	0.0171712	0.114066	-1.7652	-3.42285	0.000619692	0.0232135	-3.20782
KEGG_FOLATE_BIOSYNTHESIS	-2.41395	0.0157808	0.108712	-1.80187	-1.43601	0.151	0.279921	-0.821023
KEGG_SPLICEOSOME	-2.43488	0.0148969	0.10657	-1.8269	-3.40611	0.00065896	0.0232135	-3.18114
KEGG_NON_SMALL_CELL_LUNG_CANCER	-2.47309	0.0133949	0.099658	-1.87306	1.31652	0.188	0.315027	0.725842
KEGG_PANCREATIC_CANCER	-2.64754	0.00810796	0.0628367	-2.09109	1.18	0.238	0.359902	0.623423
KEGG_P53_SIGNALING_PATHWAY	-2.73563	0.00622606	0.0526385	-2.20579	-0.992405	0.321	0.410219	-0.493495
KEGG_BLADDER_CANCER	-2.75949	0.00578924	0.0512761	-2.23738	-0.834499	0.404	0.484077	-0.393619
KEGG_CITRATE_CYCLE_TCA_CYCLE	-2.78277	0.00538978	0.050125	-2.26843	-3.39941	0.000675317	0.0232135	-3.17049
KEGG_PROSTATE_CANCER	-2.791	0.00525452	0.050125	-2.27947	2.12007	0.034	0.12648	1.46852
KEGG_PATHWAYS_IN_CANCER	-2.8288	0.00467232	0.0482806	-2.33047	-0.178921	0.858	0.858	-0.0665127
KEGG_NITROGEN_METABOLISM	-2.86934	0.00411327	0.0450041	-2.38581	-2.10488	0.0353017	0.128747	-1.4522
KEGG_PYRUVATE_METABOLISM	-2.92518	0.00344262	0.0400204	-2.46311	-1.76836	0.077	0.207565	-1.11351
KEGG_PROTEASOME	-2.93816	0.00330168	0.0400204	-2.48126	-2.85551	0.00429674	0.0443997	-2.36686
KEGG_GAP_JUNCTION	-2.97816	0.00289985	0.0385266	-2.53762	2.40892	0.016	0.0804324	1.79588
KEGG_LYSINE_DEGRADATION	-3.08516	0.00203441	0.0291077	-2.69156	-1.08032	0.28	0.385778	-0.552842
KEGG_MELANOGENESIS	-3.21322	0.00131255	0.022194	-2.88189	2.22621	0.026	0.112465	1.58503
KEGG_PYRIMIDINE_METABOLISM	-3.43207	0.000598983	0.0111411	-3.22259	-3.21966	0.00128343	0.0290615	-2.89163
KEGG_HOMOLOGOUS_RECOMBINATION	-3.43466	0.000593297	0.0111411	-3.22673	-2.34852	0.0188483	0.0876447	-1.72473
KEGG_PURINE_METABOLISM	-3.4374	0.000587318	0.0111411	-3.23113	-2.88037	0.00397208	0.0440334	-2.40098
KEGG_BASE_EXCISION_REPAIR	-3.48043	0.000500609	0.0111411	-3.3005	-3.16283	0.00156244	0.0290615	-2.8062
KEGG_NUCLEOTIDE_EXCISION_REPAIR	-3.55471	0.000378401	0.0111411	-3.42205	-2.16846	0.030124	0.119214	-1.52109
KEGG_MISMATCH_REPAIR	-3.57672	0.000347927	0.0111411	-3.45851	-2.8244	0.00473688	0.0463716	-2.32451
KEGG_OOCYTE_MEIOSIS	-3.61669	0.000298393	0.0111411	-3.52521	-1.75069	0.08	0.212571	-1.09691
KEGG_PROGESTERONE_MEDIATED_OOCYTE_MATURATION	-3.62492	0.000289047	0.0111411	-3.53903	-1.12639	0.26	0.374884	-0.585027
KEGG_DNA_REPLICATION	-3.90118	9.57238e-05	0.00890231	-4.01898	-3.32835	0.000873625	0.0232135	-3.05868
KEGG_CELL_CYCLE	-4.22551	2.38403e-05	0.00443429	-4.62269	-3.36286	0.000771407	0.0232135	-3.11272

## Sheet: GOBP
	shTEAD4 vs. control				shMYCN vs. control
	NES	p-value	FDR	log10P(+-)	NES	p-value	FDR	log10P(+-)
TRANSLATION	3.29053	0.001	0.0281724	3	-3.03821	0.00237986	0.0972174	-2.62345
REGULATION_OF_TRANSLATIONAL_INITIATION	3.27685	0.00104973	0.0285876	2.97892	-1.83167	0.067	0.285099	-1.17393
TRANSLATIONAL_INITIATION	3.10928	0.00187546	0.0403225	2.72689	-2.58167	0.00983228	0.151296	-2.00735
PROTEIN_RNA_COMPLEX_ASSEMBLY	2.99351	0.00275786	0.0536469	2.55943	-2.20215	0.0276545	0.198356	-1.55823
REGULATION_OF_CELLULAR_COMPONENT_ORGANIZATION_AND_BIOGENESIS	2.74778	0.006	0.0937154	2.22185	-1.04722	0.295	0.437995	-0.530178
VASCULATURE_DEVELOPMENT	2.65207	0.008	0.108933	2.09691	-0.887147	0.375	0.47722	-0.425969
RIBONUCLEOPROTEIN_COMPLEX_BIOGENESIS_AND_ASSEMBLY	2.60833	0.00909859	0.117993	2.04103	-3.09438	0.00197225	0.0972174	-2.70504
ANGIOGENESIS	2.5427	0.011	0.136167	1.95861	-0.962099	0.336	0.459648	-0.473661
MACROMOLECULE_BIOSYNTHETIC_PROCESS	2.48377	0.013	0.149592	1.88606	-2.51335	0.0119592	0.160417	-1.9223
LEUKOCYTE_DIFFERENTIATION	2.43238	0.015	0.167877	1.82391	2.13208	0.033	0.209956	1.48149
CELLULAR_BIOSYNTHETIC_PROCESS	2.40892	0.016	0.171419	1.79588	-3.30539	0.000948444	0.0834937	-3.02299
NEGATIVE_REGULATION_OF_MAP_KINASE_ACTIVITY	2.38812	0.0169347	0.172945	1.77122	-1.16012	0.246	0.418712	-0.609065
PERIPHERAL_NERVOUS_SYSTEM_DEVELOPMENT	2.36562	0.018	0.177181	1.74473	2.38671	0.017	0.175574	1.76955
CARBOHYDRATE_CATABOLIC_PROCESS	2.36562	0.018	0.177181	1.74473	-1.61644	0.106	0.319696	-0.974694
CELLULAR_CARBOHYDRATE_CATABOLIC_PROCESS	2.29037	0.022	0.193269	1.65758	-1.55477	0.12	0.327332	-0.920819
CDC42_PROTEIN_SIGNAL_TRANSDUCTION	2.27343	0.023	0.199904	1.63827	1.13351	0.257	0.429384	0.590067
ENDOSOME_TRANSPORT	2.2414	0.025	0.210567	1.60206	1.6027	0.109	0.319944	0.962574
ANATOMICAL_STRUCTURE_FORMATION	2.2414	0.025	0.210567	1.60206	-0.857805	0.391	0.486221	-0.407823
REGULATION_OF_ANGIOGENESIS	2.22621	0.026	0.214566	1.58503	1.40844	0.159	0.360842	0.798603
SECONDARY_METABOLIC_PROCESS	2.22621	0.026	0.214566	1.58503	1.09618	0.273	0.429751	0.563837
SPHINGOLIPID_BIOSYNTHETIC_PROCESS	2.21152	0.027	0.216265	1.56864	1.81191	0.07	0.287163	1.1549
PEPTIDE_METABOLIC_PROCESS	2.17275	0.0297989	0.229677	1.5258	1.39838	0.162	0.36361	0.790485
INACTIVATION_OF_MAPK_ACTIVITY	2.16414	0.0304539	0.230378	1.51636	-0.665079	0.506	0.553416	-0.295849
RHO_PROTEIN_SIGNAL_TRANSDUCTION	2.13208	0.033	0.238593	1.48149	1.71144	0.087	0.307701	1.06048
REGULATION_OF_CELLULAR_PROTEIN_METABOLIC_PROCESS	2.12007	0.034	0.241548	1.46852	-0.799501	0.424	0.50565	-0.372634
REGULATION_OF_TRANSLATION	2.06723	0.0387124	0.260419	1.41215	-1.3722	0.17	0.366685	-0.769551
DEFENSE_RESPONSE_TO_VIRUS	2.03352	0.042	0.260419	1.37675	1.04289	0.297	0.437995	0.527244
BIOSYNTHETIC_PROCESS	2.03352	0.042	0.260419	1.37675	-2.87764	0.00400667	0.112878	-2.39722
INTRA_GOLGI_VESICLE_MEDIATED_TRANSPORT	2.01927	0.0434593	0.260419	1.36192	-1.12168	0.262	0.429573	-0.581699
TISSUE_REMODELING	2.01409	0.044	0.260419	1.35655	1.60725	0.108	0.319696	0.966576
BONE_REMODELING	2.00465	0.045	0.260419	1.34679	1.64485	0.1	0.319696	1
REGULATION_OF_CYTOSKELETON_ORGANIZATION_AND_BIOGENESIS	2.00465	0.045	0.260419	1.34679	1.37866	0.168	0.366685	0.774691
NEGATIVE_REGULATION_OF_TRANSFERASE_ACTIVITY	2.00465	0.045	0.260419	1.34679	-1.14069	0.254	0.426115	-0.595166
PROTEIN_IMPORT_INTO_NUCLEUS_TRANSLOCATION	1.99315	0.0462446	0.260419	1.33494	-0.654174	0.513	0.558828	-0.289883
ESTABLISHMENT_AND_OR_MAINTENANCE_OF_CELL_POLARITY	1.97737	0.048	0.260419	1.31876	2.19729	0.028	0.198922	1.55284
REGULATION_OF_MAP_KINASE_ACTIVITY	1.97737	0.048	0.260419	1.31876	-1.12168	0.262	0.429573	-0.581699
PIGMENT_BIOSYNTHETIC_PROCESS	1.95996	0.05	0.260419	1.30103	1.34694	0.178	0.372887	0.74958
REGULATION_OF_BIOLOGICAL_QUALITY	1.95996	0.05	0.260419	1.30103	-0.36381	0.716	0.729392	-0.145087
PIGMENT_METABOLIC_PROCESS	1.95148	0.051	0.260419	1.29243	1.42554	0.154	0.358456	0.812479
POSITIVE_REGULATION_OF_CELL_MIGRATION	1.92684	0.054	0.270663	1.26761	-0.623433	0.533	0.569975	-0.273273
SPERM_MOTILITY	1.91888	0.055	0.272333	1.25964	-0.747105	0.455	0.517737	-0.341989
COFACTOR_METABOLIC_PROCESS	1.91104	0.056	0.275556	1.25181	-1.12168	0.262	0.429573	-0.581699
ORGAN_MORPHOGENESIS	1.8957	0.058	0.278741	1.23657	1.55059	0.121	0.327332	0.917215
ANION_TRANSPORT	1.8735	0.061	0.28975	1.21467	-1.77438	0.076	0.297785	-1.11919
REGULATION_OF_ORGANELLE_ORGANIZATION_AND_BIOGENESIS	1.85919	0.063	0.29412	1.20066	1.05593	0.291	0.437995	0.536107
REGULATION_OF_PROTEIN_METABOLIC_PROCESS	1.85919	0.063	0.29412	1.20066	-0.635657	0.525	0.564375	-0.279841
APOPTOTIC_PROGRAM	1.84526	0.065	0.301733	1.18709	-1.83842	0.066	0.285099	-1.18046
MYELOID_LEUKOCYTE_DIFFERENTIATION	1.79912	0.072	0.312894	1.14267	2.02371	0.043	0.235779	1.36653
EXCRETION	1.79283	0.073	0.3139	1.13668	-0.767137	0.443	0.51265	-0.353596
BIOPOLYMER_BIOSYNTHETIC_PROCESS	1.78046	0.075	0.315851	1.12494	0.881587	0.378	0.479543	0.422508
GLUCOSE_CATABOLIC_PROCESS	1.77438	0.076	0.318421	1.11919	-2.51281	0.0119773	0.160417	-1.92164
SYNAPSE_ORGANIZATION_AND_BIOGENESIS	1.76241	0.078	0.325133	1.10791	1.49851	0.134	0.34427	0.872895
LYMPHOCYTE_DIFFERENTIATION	1.75652	0.079	0.325975	1.10237	1.09847	0.272	0.429751	0.565431
PROTEIN_STABILIZATION	1.72793	0.084	0.331536	1.07572	1.17249	0.241	0.41796	0.617983
SENSORY_ORGAN_DEVELOPMENT	1.72793	0.084	0.331536	1.07572	1.12639	0.26	0.429573	0.585027
STRIATED_MUSCLE_CONTRACTION_GO_0006941	1.72793	0.084	0.331536	1.07572	-1.32251	0.186	0.379104	-0.730487
AMYLOID_PRECURSOR_PROTEIN_METABOLIC_PROCESS	1.71144	0.087	0.338471	1.06048	-1.10076	0.271	0.429751	-0.567031
REGULATION_OF_CELL_MORPHOGENESIS	1.7007	0.089	0.33978	1.05061	2.36562	0.018	0.175574	1.74473
PROTEIN_SECRETION	1.7007	0.089	0.33978	1.05061	-0.822135	0.411	0.498941	-0.386158
REGULATION_OF_ENDOTHELIAL_CELL_PROLIFERATION	1.69015	0.091	0.342848	1.04096	-2.98403	0.00284476	0.0982953	-2.54595
HEMOPOIESIS	1.68494	0.092	0.342848	1.03621	2.36562	0.018	0.175574	1.74473
HETEROPHILIC_CELL_ADHESION	1.67466	0.094	0.342848	1.02687	2.20183	0.0276776	0.198356	1.55787
ENDOTHELIAL_CELL_PROLIFERATION	1.67466	0.094	0.342848	1.02687	-2.93227	0.0033649	0.101819	-2.47303
REGULATION_OF_RHO_GTPASE_ACTIVITY	1.65957	0.097	0.346066	1.01323	1.32854	0.184	0.37866	0.735182
REGULATION_OF_GROWTH	1.64972	0.099	0.348634	1.00436	-0.498687	0.618	0.638314	-0.209012
HEMOPOIETIC_OR_LYMPHOID_ORGAN_DEVELOPMENT	1.63048	0.103	0.356572	0.987163	2.38671	0.017	0.175574	1.76955
POSITIVE_REGULATION_OF_TRANSLATION	1.63048	0.103	0.356572	0.987163	-0.53594	0.592	0.616918	-0.227678
NEGATIVE_REGULATION_OF_SIGNAL_TRANSDUCTION	1.61644	0.106	0.360842	0.974694	-0.735558	0.462	0.522474	-0.335358
HEME_BIOSYNTHETIC_PROCESS	1.59819	0.11	0.366816	0.958607	1.5423	0.123	0.327332	0.910095
PROTEIN_AMINO_ACID_N_LINKED_GLYCOSYLATION	1.59819	0.11	0.366816	0.958607	0.956143	0.339	0.460837	0.4698
HORMONE_SECRETION	1.58485	0.113	0.373769	0.946922	-0.729003	0.466	0.52441	-0.331614
REGULATION_OF_RAS_GTPASE_ACTIVITY	1.58047	0.114	0.374048	0.943095	1.45021	0.147	0.353232	0.832683
MAPKKK_CASCADE_GO_0000165	1.58047	0.114	0.374048	0.943095	-0.599259	0.549	0.581755	-0.260428
NEGATIVE_REGULATION_OF_PROTEIN_METABOLIC_PROCESS	1.57611	0.115	0.374323	0.939302	1.45381	0.146	0.353232	0.835647
REGULATION_OF_RHO_PROTEIN_SIGNAL_TRANSDUCTION	1.57611	0.115	0.374323	0.939302	-0.874217	0.382	0.481627	-0.417937
NEGATIVE_REGULATION_OF_MULTICELLULAR_ORGANISMAL_PROCESS	1.57179	0.116	0.375772	0.935542	1.62108	0.105	0.319696	0.978811
SENSORY_PERCEPTION_OF_CHEMICAL_STIMULUS	1.56749	0.117	0.375772	0.931814	1.88079	0.06	0.272333	1.22185
HEME_METABOLIC_PROCESS	1.54643	0.122	0.375772	0.91364	1.76241	0.078	0.297785	1.10791
REGULATION_OF_ACTIN_POLYMERIZATION_AND_OR_DEPOLYMERIZATION	1.54643	0.122	0.375772	0.91364	0.841621	0.4	0.491429	0.39794
VITAMIN_METABOLIC_PROCESS	1.54643	0.122	0.375772	0.91364	-1.36581	0.172	0.366903	-0.764472
REGULATION_OF_SECRETION	1.5423	0.123	0.375772	0.910095	1.16752	0.243	0.41796	0.614394
SMALL_GTPASE_MEDIATED_SIGNAL_TRANSDUCTION	1.5423	0.123	0.375772	0.910095	-0.48032	0.631	0.650918	-0.199971
BODY_FLUID_SECRETION	1.53412	0.125	0.375772	0.90309	1.46106	0.144	0.353232	0.841638
REGULATION_OF_HORMONE_SECRETION	1.53412	0.125	0.375772	0.90309	-0.787482	0.431	0.50565	-0.365523
NEGATIVE_REGULATION_OF_ANGIOGENESIS	1.53007	0.126	0.375772	0.899629	1.23993	0.215	0.401039	0.667562
NEURON_APOPTOSIS	1.53007	0.126	0.375772	0.899629	0.889006	0.374	0.47722	0.427128
POSITIVE_REGULATION_OF_CELL_ADHESION	1.52604	0.127	0.375772	0.896196	2.32635	0.02	0.181556	1.69897
MYELOID_CELL_DIFFERENTIATION	1.51806	0.129	0.375772	0.88941	1.8663	0.062	0.273805	1.20761
REGULATION_OF_SMALL_GTPASE_MEDIATED_SIGNAL_TRANSDUCTION	1.51806	0.129	0.375772	0.88941	0.930717	0.352	0.4661	0.453457
SYNAPTOGENESIS	1.5141	0.13	0.375772	0.886057	1.26743	0.205	0.394082	0.688246
REGULATION_OF_MULTICELLULAR_ORGANISMAL_PROCESS	1.5141	0.13	0.375772	0.886057	-0.543189	0.587	0.613272	-0.231362
REGULATION_OF_CELL_SHAPE	1.51017	0.131	0.375772	0.882729	2.15707	0.031	0.209521	1.50864
ACTIN_FILAMENT_POLYMERIZATION	1.51017	0.131	0.375772	0.882729	0.887147	0.375	0.47722	0.425969
PROTEIN_MATURATION	1.50238	0.133	0.375772	0.876148	-0.733916	0.463	0.522474	-0.334419
NEGATIVE_REGULATION_OF_CELLULAR_PROTEIN_METABOLIC_PROCESS	1.49851	0.134	0.375772	0.872895	1.31058	0.19	0.383284	0.721246
NEGATIVE_REGULATION_OF_GROWTH	1.49851	0.134	0.375772	0.872895	-0.517224	0.605	0.628861	-0.218245
NEGATIVE_REGULATION_OF_CYTOSKELETON_ORGANIZATION_AND_BIOGENESIS	1.47953	0.139	0.375772	0.856985	1.57611	0.115	0.323983	0.939302
LEUKOCYTE_MIGRATION	1.47953	0.139	0.375772	0.856985	-1.24536	0.213	0.40097	-0.67162
POSITIVE_REGULATION_OF_HYDROLASE_ACTIVITY	1.47579	0.14	0.375772	0.853872	-1.25908	0.208	0.3952	-0.681937
CYCLIC_NUCLEOTIDE_METABOLIC_PROCESS	1.47208	0.141	0.375772	0.850781	1.28441	0.199	0.388955	0.701147
T_CELL_DIFFERENTIATION	1.46838	0.142	0.375772	0.847712	1.61644	0.106	0.319696	0.974694
KERATINOCYTE_DIFFERENTIATION	1.46838	0.142	0.375772	0.847712	0.841621	0.4	0.491429	0.39794
ACTIN_FILAMENT_BUNDLE_FORMATION	1.46838	0.142	0.375772	0.847712	-0.988312	0.323	0.454666	-0.490797
DNA_FRAGMENTATION_DURING_APOPTOSIS	1.46471	0.143	0.375772	0.844664	-2.2917	0.021923	0.185299	-1.6591
DEVELOPMENTAL_MATURATION	1.46106	0.144	0.375772	0.841638	1.48328	0.138	0.347981	0.860121
TYROSINE_PHOSPHORYLATION_OF_STAT_PROTEIN	1.46106	0.144	0.375772	0.841638	1.19779	0.231	0.409386	0.636388
ACTIN_FILAMENT_BASED_MOVEMENT	1.45381	0.146	0.375772	0.835647	3.06051	0.00220958	0.0972174	2.65569
WOUND_HEALING	1.45021	0.147	0.375772	0.832683	1.72238	0.085	0.305925	1.07058
CELL_ACTIVATION	1.43601	0.151	0.375772	0.821023	1.07584	0.282	0.430643	0.549751
ACTIN_FILAMENT_ORGANIZATION	1.43601	0.151	0.375772	0.821023	-0.986271	0.324	0.454666	-0.489455
PATTERN_SPECIFICATION_PROCESS	1.43601	0.151	0.375772	0.821023	-1.61183	0.107	0.319696	-0.970616
COAGULATION	1.4325	0.152	0.375772	0.818156	1.32854	0.184	0.37866	0.735182
LIPID_HOMEOSTASIS	1.4325	0.152	0.375772	0.818156	-1.64485	0.1	0.319696	-1
POSITIVE_REGULATION_OF_CYTOSKELETON_ORGANIZATION_AND_BIOGENESIS	1.42901	0.153	0.375772	0.815309	-0.762101	0.446	0.514664	-0.350665
REGULATION_OF_RAS_PROTEIN_SIGNAL_TRANSDUCTION	1.42901	0.153	0.375772	0.815309	-0.780664	0.435	0.507707	-0.361511
NEGATIVE_REGULATION_OF_SECRETION	1.42901	0.153	0.375772	0.815309	-1.09162	0.275	0.430163	-0.560667
CHEMICAL_HOMEOSTASIS	1.42901	0.153	0.375772	0.815309	-1.78046	0.075	0.296014	-1.12494
T_CELL_ACTIVATION	1.42554	0.154	0.375772	0.812479	1.45381	0.146	0.353232	0.835647
CELL_MATURATION	1.42209	0.155	0.375772	0.809668	1.56749	0.117	0.324031	0.931814
LEUKOCYTE_CHEMOTAXIS	1.41523	0.157	0.378375	0.8041	-1.64972	0.099	0.319696	-1.00436
POSITIVE_REGULATION_OF_CASPASE_ACTIVITY	1.40507	0.16	0.379238	0.79588	-1.02789	0.304	0.444308	-0.517126
REGULATION_OF_CELL_MIGRATION	1.40172	0.161	0.379238	0.793174	1.7392	0.082	0.301775	1.08619
COFACTOR_BIOSYNTHETIC_PROCESS	1.39838	0.162	0.379238	0.790485	-0.777269	0.437	0.508742	-0.359519
CASPASE_ACTIVATION	1.39838	0.162	0.379238	0.790485	-1.07584	0.282	0.430643	-0.549751
GENERATION_OF_A_SIGNAL_INVOLVED_IN_CELL_CELL_SIGNALING	1.39838	0.162	0.379238	0.790485	-1.21859	0.223	0.405771	-0.651695
NEGATIVE_REGULATION_OF_CELL_MIGRATION	1.38845	0.165	0.382034	0.782516	2.38671	0.017	0.175574	1.76955
CALCIUM_INDEPENDENT_CELL_CELL_ADHESION	1.38517	0.166	0.382034	0.779892	1.39174	0.164	0.365558	0.785156
DETECTION_OF_EXTERNAL_STIMULUS	1.38517	0.166	0.382034	0.779892	1.38517	0.166	0.365558	0.779892
RAS_PROTEIN_SIGNAL_TRANSDUCTION	1.38517	0.166	0.382034	0.779892	-0.534494	0.593	0.617173	-0.226945
B_CELL_DIFFERENTIATION	1.3722	0.17	0.387351	0.769551	-0.890868	0.373	0.47722	-0.428291
TRANSFORMING_GROWTH_FACTOR_BETA_RECEPTOR_SIGNALING_PATHWAY	1.36581	0.172	0.387351	0.764472	-1.38517	0.166	0.365558	-0.779892
REGULATION_OF_CELL_GROWTH	1.36263	0.173	0.387351	0.761954	1.13113	0.258	0.429573	0.58838
CELL_PROJECTION_BIOGENESIS	1.35946	0.174	0.387351	0.759451	2.17475	0.0296489	0.203556	1.52799
LEUKOCYTE_ACTIVATION	1.35946	0.174	0.387351	0.759451	1.0736	0.283	0.431364	0.548214
NEGATIVE_REGULATION_OF_CELLULAR_COMPONENT_ORGANIZATION_AND_BIOGENESIS	1.35946	0.174	0.387351	0.759451	-0.815126	0.415	0.501561	-0.381952
JAK_STAT_CASCADE	1.34384	0.179	0.392072	0.747147	1.55898	0.119	0.327332	0.924453
MEMBRANE_FUSION	1.34384	0.179	0.392072	0.747147	-0.760426	0.447	0.51509	-0.349692
DETECTION_OF_STIMULUS_INVOLVED_IN_SENSORY_PERCEPTION	1.34076	0.18	0.393209	0.744727	1.58485	0.113	0.321676	0.946922
POSITIVE_REGULATION_OF_ANGIOGENESIS	1.33768	0.181	0.394339	0.742321	0.823894	0.41	0.498467	0.387216
NEGATIVE_REGULATION_OF_CELL_PROLIFERATION	1.33157	0.183	0.396581	0.737549	-0.388022	0.698	0.712832	-0.156145
GLYCOPROTEIN_METABOLIC_PROCESS	1.33157	0.183	0.396581	0.737549	-0.797777	0.425	0.50565	-0.371611
BILE_ACID_METABOLIC_PROCESS	1.32854	0.184	0.396644	0.735182	0.796055	0.426	0.50565	0.37059
REGULATION_OF_JNK_ACTIVITY	1.32552	0.185	0.39775	0.732828	-2.21863	0.0265117	0.196864	-1.57656
GLYCOPROTEIN_CATABOLIC_PROCESS	1.31652	0.188	0.39999	0.725842	-0.911561	0.362	0.472247	-0.441291
REGULATION_OF_MEMBRANE_POTENTIAL	1.30176	0.193	0.409561	0.714443	0.942376	0.346	0.465703	0.460924
PROTEIN_POLYMERIZATION	1.29884	0.194	0.410617	0.712198	1.23186	0.218	0.403868	0.661544
REGULATION_OF_ACTIN_FILAMENT_LENGTH	1.29303	0.196	0.413778	0.707744	0.874217	0.382	0.481627	0.417937
HORMONE_METABOLIC_PROCESS	1.29015	0.197	0.414658	0.705534	-1.41183	0.158	0.359571	-0.801343
LEARNING_AND_OR_MEMORY	1.28441	0.199	0.414658	0.701147	-0.773883	0.439	0.508742	-0.357535
BLOOD_COAGULATION	1.27871	0.201	0.414658	0.696804	1.24536	0.213	0.40097	0.67162
ION_HOMEOSTASIS	1.27871	0.201	0.414658	0.696804	-1.43953	0.15	0.354191	-0.823909
IMMUNE_SYSTEM_DEVELOPMENT	1.27587	0.202	0.414658	0.694649	1.74491	0.081	0.301775	1.09151
REGULATION_OF_PROTEIN_POLYMERIZATION	1.26743	0.205	0.416629	0.688246	0.808157	0.419	0.504158	0.377786
REGULATION_OF_BLOOD_PRESSURE	1.25357	0.21	0.422586	0.677781	1.80548	0.071	0.287163	1.14874
ENDOTHELIAL_CELL_MIGRATION	1.25357	0.21	0.422586	0.677781	-0.97815	0.328	0.456518	-0.484126
REGULATION_OF_RESPONSE_TO_EXTERNAL_STIMULUS	1.25357	0.21	0.422586	0.677781	-1.07584	0.282	0.430643	-0.549751
REGULATION_OF_ANATOMICAL_STRUCTURE_MORPHOGENESIS	1.24264	0.214	0.423337	0.669586	1.35005	0.177	0.372704	0.752027
AMINO_ACID_DERIVATIVE_BIOSYNTHETIC_PROCESS	1.23454	0.217	0.426091	0.66354	-0.830953	0.406	0.495078	-0.391474
HETEROCYCLE_METABOLIC_PROCESS	1.21596	0.224	0.42859	0.649752	-0.836275	0.403	0.49363	-0.394695
REGULATION_OF_CATABOLIC_PROCESS	1.21596	0.224	0.42859	0.649752	-1.58927	0.112	0.319944	-0.950782
CELL_STRUCTURE_DISASSEMBLY_DURING_APOPTOSIS	1.21073	0.226	0.4294	0.645892	-1.08482	0.278	0.430163	-0.555955
INORGANIC_ANION_TRANSPORT	1.19522	0.232	0.435733	0.634512	-0.984235	0.325	0.454666	-0.488117
REGIONALIZATION	1.19522	0.232	0.435733	0.634512	-1.49851	0.134	0.34427	-0.872895
GOLGI_VESICLE_TRANSPORT	1.18252	0.237	0.441068	0.625252	-1.5423	0.123	0.327332	-0.910095
N_TERMINAL_PROTEIN_AMINO_ACID_MODIFICATION	1.18	0.238	0.441923	0.623423	-1.06473	0.287	0.435026	-0.542118
IMMUNE_EFFECTOR_PROCESS	1.16752	0.243	0.446969	0.614394	1.49085	0.136	0.346143	0.866461
EXTRACELLULAR_STRUCTURE_ORGANIZATION_AND_BIOGENESIS	1.16505	0.244	0.446969	0.61261	1.61183	0.107	0.319696	0.970616
GROWTH	1.16505	0.244	0.446969	0.61261	-0.690309	0.49	0.542453	-0.309804
PROTEIN_PROCESSING	1.16012	0.246	0.449528	0.609065	-0.750423	0.453	0.517737	-0.343902
REGULATION_OF_BODY_FLUID_LEVELS	1.15522	0.248	0.449528	0.605548	0.944332	0.345	0.465703	0.462181
CYTOKINE_SECRETION	1.15035	0.25	0.449528	0.60206	0.970093	0.332	0.458618	0.478862
SPLICEOSOME_ASSEMBLY	1.15035	0.25	0.449528	0.60206	-1.25908	0.208	0.3952	-0.681937
NITROGEN_COMPOUND_BIOSYNTHETIC_PROCESS	1.15035	0.25	0.449528	0.60206	-1.76241	0.078	0.297785	-1.10791
LYMPHOCYTE_ACTIVATION	1.14792	0.251	0.449528	0.600326	1.00895	0.313	0.44693	0.504456
SENSORY_PERCEPTION_OF_TASTE	1.14792	0.251	0.449528	0.600326	0.890868	0.373	0.47722	0.428291
INTERLEUKIN_1_SECRETION	1.14551	0.252	0.449528	0.598599	-0.968089	0.333	0.458618	-0.477556
POST_GOLGI_VESICLE_MEDIATED_TRANSPORT	1.14309	0.253	0.450148	0.596879	-0.996515	0.319	0.45247	-0.496209
REGULATION_OF_MYELOID_CELL_DIFFERENTIATION	1.13829	0.255	0.450577	0.59346	1.17	0.242	0.41796	0.616185
B_CELL_ACTIVATION	1.12403	0.261	0.454663	0.583359	-0.748763	0.454	0.517737	-0.342944
EMBRYO_IMPLANTATION	1.11465	0.265	0.458485	0.576754	1.67978	0.093	0.316588	1.03152
PHOTOTRANSDUCTION	1.11465	0.265	0.458485	0.576754	1.47208	0.141	0.352284	0.850781
ACTIVATION_OF_NF_KAPPAB_TRANSCRIPTION_FACTOR	1.10306	0.27	0.461485	0.568636	-0.572475	0.567	0.596189	-0.246417
REGULATION_OF_NEUROTRANSMITTER_LEVELS	1.09162	0.275	0.466131	0.560667	-0.568051	0.57	0.597805	-0.244125
DNA_CATABOLIC_PROCESS	1.08935	0.276	0.466616	0.559091	-2.74067	0.00613147	0.118021	-2.21244
NEGATIVE_REGULATION_OF_CYTOKINE_BIOSYNTHETIC_PROCESS	1.08708	0.277	0.466616	0.55752	1.00686	0.314	0.44693	0.50307
REGULATED_SECRETORY_PATHWAY	1.08482	0.278	0.467337	0.555955	-2.12399	0.033671	0.21161	-1.47274
COENZYME_METABOLIC_PROCESS	1.07584	0.282	0.46828	0.549751	-1.63048	0.103	0.319696	-0.987163
MONOCARBOXYLIC_ACID_TRANSPORT	1.07584	0.282	0.46828	0.549751	-1.7392	0.082	0.301775	-1.08619
GLIOGENESIS	1.06252	0.288	0.471535	0.540608	0.825655	0.409	0.497993	0.388277
RECEPTOR_MEDIATED_ENDOCYTOSIS	1.04939	0.294	0.47552	0.531653	-0.834499	0.404	0.494114	-0.393619
NUCLEAR_ORGANIZATION_AND_BIOGENESIS	1.04939	0.294	0.47552	0.531653	-1.15035	0.25	0.421134	-0.60206
SPERMATID_DEVELOPMENT	1.04505	0.296	0.47552	0.528708	-0.917272	0.359	0.470791	-0.444906
STRESS_ACTIVATED_PROTEIN_KINASE_SIGNALING_PATHWAY	1.04289	0.297	0.47552	0.527244	1.11465	0.265	0.429573	0.576754
REGULATION_OF_HEART_CONTRACTION	1.04073	0.298	0.47552	0.525784	-1.20036	0.23	0.409386	-0.638272
APOPTOTIC_NUCLEAR_CHANGES	1.03215	0.302	0.478167	0.519993	-1.21073	0.226	0.4067	-0.645892
MITOCHONDRIAL_TRANSPORT	1.03215	0.302	0.478167	0.519993	-1.71144	0.087	0.307701	-1.06048
REGULATION_OF_GTPASE_ACTIVITY	1.00895	0.313	0.484661	0.504456	-0.635657	0.525	0.564375	-0.279841
REGULATION_OF_HOMEOSTATIC_PROCESS	1.00479	0.315	0.484661	0.501689	1.41865	0.156	0.359297	0.806875
REGULATION_OF_MAPKKK_CASCADE	1.00479	0.315	0.484661	0.501689	1.369	0.171	0.366685	0.767004
NEGATIVE_REGULATION_OF_IMMUNE_SYSTEM_PROCESS	0.996515	0.319	0.486237	0.496209	1.31951	0.187	0.379104	0.728158
TRANSMEMBRANE_RECEPTOR_PROTEIN_SERINE_THREONINE_KINASE_SIGNALING_PATHWAY	0.992405	0.321	0.487467	0.493495	-2.03503	0.0418474	0.233429	-1.37833
PEROXISOME_ORGANIZATION_AND_BIOGENESIS	0.990356	0.322	0.488078	0.492144	-1.19779	0.231	0.409386	-0.636388
SODIUM_ION_TRANSPORT	0.986271	0.324	0.488391	0.489455	1.57611	0.115	0.323983	0.939302
RESPONSE_TO_TOXIN	0.986271	0.324	0.488391	0.489455	0.934589	0.35	0.465717	0.455932
ICOSANOID_METABOLIC_PROCESS	0.982203	0.326	0.490501	0.486782	-2.94365	0.0032437	0.101819	-2.48896
CELLULAR_DEFENSE_RESPONSE	0.966088	0.334	0.498863	0.476254	1.43953	0.15	0.354191	0.823909
REGULATION_OF_CELL_ADHESION	0.952191	0.341	0.504357	0.467246	2.25713	0.024	0.192235	1.61979
ACTIN_POLYMERIZATION_AND_OR_DEPOLYMERIZATION	0.938476	0.348	0.507354	0.458421	1.63048	0.103	0.319696	0.987163
MRNA_SPLICE_SITE_SELECTION	0.938476	0.348	0.507354	0.458421	-1.79912	0.072	0.289773	-1.14267
REGULATION_OF_CELLULAR_COMPONENT_SIZE	0.936531	0.349	0.507354	0.457175	0.952191	0.341	0.462786	0.467246
NEGATIVE_REGULATION_OF_PHOSPHORYLATION	0.934589	0.35	0.507904	0.455932	2.4706	0.0134888	0.168206	1.87003
PROTEIN_POLYUBIQUITINATION	0.928786	0.353	0.508292	0.452225	1.62576	0.104	0.319696	0.982967
AMINE_BIOSYNTHETIC_PROCESS	0.928786	0.353	0.508292	0.452225	-1.37866	0.168	0.366685	-0.774691
REGULATION_OF_JNK_CASCADE	0.924934	0.355	0.508671	0.449772	1.11465	0.265	0.429573	0.576754
POSITIVE_REGULATION_OF_TRANSCRIPTION_FACTOR_ACTIVITY	0.919183	0.358	0.508671	0.446117	-0.753749	0.451	0.517737	-0.345823
FOCAL_ADHESION_FORMATION	0.911561	0.362	0.510449	0.441291	1.82501	0.068	0.287163	1.16749
REGULATION_OF_NEURON_APOPTOSIS	0.909663	0.363	0.510449	0.440093	-1.22123	0.222	0.405758	-0.653647
NEGATIVE_REGULATION_OF_PHOSPHATE_METABOLIC_PROCESS	0.887147	0.375	0.516653	0.425969	2.07689	0.0378118	0.226613	1.42237
PEPTIDYL_TYROSINE_MODIFICATION	0.868721	0.385	0.518129	0.414539	2.04353	0.041	0.233344	1.38722
RESPONSE_TO_TEMPERATURE_STIMULUS	0.868721	0.385	0.518129	0.414539	-1.96859	0.049	0.248652	-1.3098
AGING	0.866894	0.386	0.518129	0.413413	-2.75615	0.00584862	0.118021	-2.23295
REGULATION_OF_CELL_CELL_ADHESION	0.86325	0.388	0.518129	0.411168	1.59371	0.111	0.319944	0.954677
GLUTAMATE_SIGNALING_PATHWAY	0.86325	0.388	0.518129	0.411168	1.20812	0.227	0.407602	0.643974
RNA_3END_PROCESSING	0.859617	0.39	0.518129	0.408935	-1.71689	0.086	0.306821	-1.0655
MITOCHONDRIAL_MEMBRANE_ORGANIZATION_AND_BIOGENESIS	0.85419	0.393	0.518129	0.405607	-0.789192	0.43	0.50565	-0.366532
REGULATION_OF_CELLULAR_PH	0.850585	0.395	0.518129	0.403403	0.794336	0.427	0.50565	0.369572
DETECTION_OF_CHEMICAL_STIMULUS	0.843409	0.399	0.519081	0.399027	1.50238	0.133	0.34427	0.876148
POSITIVE_REGULATION_OF_MAPKKK_CASCADE	0.830953	0.406	0.520725	0.391474	0.838055	0.402	0.493144	0.395774
PROTEIN_TARGETING_TO_MEMBRANE	0.815126	0.415	0.526483	0.381952	-1.48706	0.137	0.346529	-0.863279
MYOBLAST_DIFFERENTIATION	0.802956	0.422	0.528061	0.374688	-1.14551	0.252	0.42363	-0.598599
CELLULAR_MONOVALENT_INORGANIC_CATION_HOMEOSTASIS	0.794336	0.427	0.529376	0.369572	0.801227	0.423	0.50565	0.37366
REGULATION_OF_T_CELL_PROLIFERATION	0.794336	0.427	0.529376	0.369572	-1.21073	0.226	0.4067	-0.645892
INTRACELLULAR_TRANSPORT	-0.13957	0.889	0.889	-0.0510982	-1.67978	0.093	0.316588	-1.03152
ANATOMICAL_STRUCTURE_MORPHOGENESIS	-0.156042	0.876	0.877074	-0.0574959	3.29053	0.001	0.0834937	3
NEUROLOGICAL_SYSTEM_PROCESS	-0.201893	0.84	0.842061	-0.0757207	2.14441	0.032	0.209956	1.49485
IMMUNE_SYSTEM_PROCESS	-0.210856	0.833	0.83607	-0.079355	-0.442676	0.658	0.676209	-0.181774
HOMEOSTATIC_PROCESS	-0.223688	0.823	0.827049	-0.0846002	-1.17	0.242	0.41796	-0.616185
SENSORY_PERCEPTION	-0.224973	0.822	0.827049	-0.0851282	2.12007	0.034	0.212046	1.46852
DEFENSE_RESPONSE	-0.230118	0.818	0.824052	-0.0872467	1.47579	0.14	0.351938	0.853872
ESTABLISHMENT_OF_PROTEIN_LOCALIZATION	-0.232693	0.816	0.823052	-0.0883098	-2.05954	0.0394426	0.228544	-1.40403
CELL_CELL_SIGNALING	-0.253347	0.8	0.807911	-0.09691	1.8735	0.061	0.273805	1.21467
SECRETION	-0.283231	0.777	0.785655	-0.109579	-1.85218	0.064	0.281118	-1.19382
CELLULAR_HOMEOSTASIS	-0.294992	0.768	0.777517	-0.114639	-1.15035	0.25	0.421134	-0.60206
ACTIN_FILAMENT_BASED_PROCESS	-0.312053	0.755	0.765304	-0.122053	2.15204	0.0313944	0.209521	1.50315
PROTEIN_TRANSPORT	-0.326561	0.744	0.755091	-0.128427	-1.95148	0.051	0.254067	-1.29243
SYNAPTIC_TRANSMISSION	-0.355787	0.722	0.733674	-0.141463	1.48706	0.137	0.346529	0.863279
INTRACELLULAR_PROTEIN_TRANSPORT	-0.371856	0.71	0.722379	-0.148742	-2.21707	0.026618	0.196864	-1.57482
PROTEIN_LOCALIZATION	-0.37858	0.705	0.718186	-0.151811	-1.91888	0.055	0.25974	-1.25964
ACTIN_CYTOSKELETON_ORGANIZATION_AND_BIOGENESIS	-0.394787	0.693	0.706843	-0.159267	2.69684	0.007	0.120065	2.1549
GLYCOPROTEIN_BIOSYNTHETIC_PROCESS	-0.400213	0.689	0.703641	-0.161781	-0.809896	0.418	0.504158	-0.378824
JNK_CASCADE	-0.401571	0.688	0.703499	-0.162412	-0.510073	0.61	0.631648	-0.21467
CELLULAR_PROTEIN_METABOLIC_PROCESS	-0.408373	0.683	0.699262	-0.165579	-1.55059	0.121	0.327332	-0.917215
MEMBRANE_ORGANIZATION_AND_BIOGENESIS	-0.415194	0.678	0.695014	-0.16877	1.26743	0.205	0.394082	0.688246
TRANSMISSION_OF_NERVE_IMPULSE	-0.423405	0.672	0.689729	-0.172631	1.25082	0.211	0.399044	0.675718
HEMOSTASIS	-0.424776	0.671	0.689569	-0.173277	-0.614326	0.539	0.574137	-0.268411
REGULATION_OF_HYDROLASE_ACTIVITY	-0.43302	0.665	0.684263	-0.177178	-1.16012	0.246	0.418712	-0.609065
CELL_SUBSTRATE_ADHESION	-0.446827	0.655	0.674823	-0.183759	2.42442	0.0153327	0.175574	1.81438
SKELETAL_MUSCLE_DEVELOPMENT	-0.448212	0.654	0.674644	-0.184422	-0.852386	0.394	0.489207	-0.404504
NEGATIVE_REGULATION_OF_BIOLOGICAL_PROCESS	-0.449598	0.653	0.674464	-0.185087	2.00465	0.045	0.240294	1.34679
VESICLE_MEDIATED_TRANSPORT	-0.457934	0.647	0.669113	-0.189096	-0.61584	0.538	0.57382	-0.269218
CELLULAR_MACROMOLECULE_METABOLIC_PROCESS	-0.459326	0.646	0.668925	-0.189767	-1.44307	0.149	0.354191	-0.826814
POSITIVE_REGULATION_OF_BINDING	-0.469097	0.639	0.662516	-0.194499	1.00895	0.313	0.44693	0.504456
PEPTIDYL_TYROSINE_PHOSPHORYLATION	-0.474701	0.635	0.659206	-0.197226	1.71689	0.086	0.306821	1.0655
PEPTIDYL_AMINO_ACID_MODIFICATION	-0.478914	0.632	0.656926	-0.199283	1.08708	0.277	0.430163	0.55752
CELL_MATRIX_ADHESION	-0.485954	0.627	0.652559	-0.202732	2.43613	0.0148454	0.173267	1.82841
NEGATIVE_REGULATION_OF_CATALYTIC_ACTIVITY	-0.485954	0.627	0.652559	-0.202732	-0.915365	0.36	0.471346	-0.443697
PROTEIN_AMINO_ACID_DEPHOSPHORYLATION	-0.49585	0.62	0.646922	-0.207608	2.18349	0.029	0.200788	1.5376
MITOCHONDRION_ORGANIZATION_AND_BIOGENESIS	-0.498687	0.618	0.64566	-0.209012	-2.39043	0.0168285	0.175574	-1.77395
NEURON_DIFFERENTIATION	-0.502949	0.615	0.643348	-0.211125	1.44663	0.148	0.353556	0.829738
SYSTEM_PROCESS	-0.504372	0.614	0.643126	-0.211832	3.29053	0.001	0.0834937	3
POSITIVE_REGULATION_OF_DNA_BINDING	-0.505796	0.613	0.642902	-0.21254	-0.972102	0.331	0.458351	-0.480172
REGULATION_OF_MUSCLE_CONTRACTION	-0.505796	0.613	0.642902	-0.21254	-1.60725	0.108	0.319696	-0.966576
CYTOSKELETON_DEPENDENT_INTRACELLULAR_TRANSPORT	-0.507221	0.612	0.642902	-0.213249	1.59371	0.111	0.319944	0.954677
NEGATIVE_REGULATION_OF_CELL_CYCLE	-0.518657	0.604	0.635912	-0.218963	1.52204	0.128	0.336257	0.89279
RNA_SPLICINGVIA_TRANSESTERIFICATION_REACTIONS	-0.518657	0.604	0.635912	-0.218963	-1.81842	0.069	0.287163	-1.16115
MUSCLE_CELL_DIFFERENTIATION	-0.520091	0.603	0.635912	-0.219683	-0.790904	0.429	0.50565	-0.367543
CELLULAR_CATION_HOMEOSTASIS	-0.521527	0.602	0.635912	-0.220404	-1.45021	0.147	0.353232	-0.832683
NEGATIVE_REGULATION_OF_CELLULAR_PROCESS	-0.53594	0.592	0.626508	-0.227678	2.09693	0.036	0.221977	1.4437
CELL_DEVELOPMENT	-0.547551	0.584	0.618843	-0.233587	-0.185292	0.853	0.854045	-0.069051
REGULATION_OF_CELL_DIFFERENTIATION	-0.554846	0.579	0.614342	-0.237321	1.02577	0.305	0.444973	0.5157
BIOGENIC_AMINE_METABOLIC_PROCESS	-0.556308	0.578	0.614078	-0.238072	-1.6954	0.09	0.315579	-1.04576
REGULATION_OF_T_CELL_ACTIVATION	-0.559237	0.576	0.61275	-0.239578	-0.651072	0.515	0.559515	-0.288193
PROGRAMMED_CELL_DEATH	-0.560703	0.575	0.612484	-0.240332	-0.257232	0.797	0.803888	-0.0985417
POSITIVE_REGULATION_OF_MULTICELLULAR_ORGANISMAL_PROCESS	-0.56217	0.574	0.612217	-0.241088	0.946291	0.344	0.465703	0.463442
RNA_CATABOLIC_PROCESS	-0.569525	0.569	0.607677	-0.244888	-1.91104	0.056	0.262943	-1.25181
APOPTOTIC_MITOCHONDRIAL_CHANGES	-0.572475	0.567	0.606334	-0.246417	-1.25908	0.208	0.3952	-0.681937
NEGATIVE_REGULATION_OF_TRANSLATION	-0.573952	0.566	0.606058	-0.247184	-0.883437	0.377	0.479019	-0.423659
BEHAVIOR	-0.575431	0.565	0.605781	-0.247952	1.19779	0.231	0.409386	0.636388
MESODERM_DEVELOPMENT	-0.575431	0.565	0.605781	-0.247952	1.10768	0.268	0.429751	0.571865
SECRETION_BY_CELL	-0.57691	0.564	0.605781	-0.248721	-1.83842	0.066	0.285099	-1.18046
APOPTOSIS_GO	-0.578391	0.563	0.605781	-0.249492	-0.236558	0.813	0.818005	-0.0899095
CATION_HOMEOSTASIS	-0.581357	0.561	0.604666	-0.251037	-1.38845	0.165	0.365558	-0.782516
PROTEIN_KINASE_CASCADE	-0.582842	0.56	0.604386	-0.251812	2.45726	0.014	0.168206	1.85387
VESICLE_LOCALIZATION	-0.585815	0.558	0.603024	-0.253366	-1.65463	0.098	0.319696	-1.00877
OXYGEN_AND_REACTIVE_OXYGEN_SPECIES_METABOLIC_PROCESS	-0.585815	0.558	0.603024	-0.253366	-2.31052	0.0208591	0.184484	-1.6807
RESPONSE_TO_WOUNDING	-0.587303	0.557	0.603024	-0.254145	1.8957	0.058	0.270777	1.23657
NEGATIVE_REGULATION_OF_RNA_METABOLIC_PROCESS	-0.587303	0.557	0.603024	-0.254145	-0.394787	0.693	0.708612	-0.159267
POSITIVE_REGULATION_OF_CYTOKINE_BIOSYNTHETIC_PROCESS	-0.590284	0.555	0.602972	-0.255707	1.28727	0.198	0.388861	0.703335
RESPONSE_TO_DRUG	-0.590284	0.555	0.602972	-0.255707	-1.42554	0.154	0.358456	-0.812479
REGULATION_OF_PROTEIN_SECRETION	-0.591777	0.554	0.602972	-0.25649	1.21859	0.223	0.405771	0.651695
NEGATIVE_REGULATION_OF_TRANSCRIPTION_DNA_DEPENDENT	-0.591777	0.554	0.602972	-0.25649	-0.361133	0.718	0.730518	-0.143876
HUMORAL_IMMUNE_RESPONSE	-0.59776	0.55	0.600735	-0.259637	-1.29015	0.197	0.387829	-0.705534
TRANSPORT	-0.60076	0.548	0.599352	-0.261219	-1.66959	0.095	0.316796	-1.02228
CIRCADIAN_RHYTHM	-0.603765	0.546	0.597965	-0.262807	1.76241	0.078	0.297785	1.10791
REGULATION_OF_LYMPHOCYTE_ACTIVATION	-0.606775	0.544	0.596574	-0.264401	-0.511501	0.609	0.631648	-0.215383
ALCOHOL_METABOLIC_PROCESS	-0.606775	0.544	0.596574	-0.264401	-1.30763	0.191	0.383408	-0.718967
TRANSITION_METAL_ION_TRANSPORT	-0.609791	0.542	0.595981	-0.266001	1.30176	0.193	0.384588	0.714443
INFLAMMATORY_RESPONSE	-0.611301	0.541	0.595683	-0.266803	1.27587	0.202	0.391076	0.694649
NEGATIVE_REGULATION_OF_TRANSCRIPTION_FROM_RNA_POLYMERASE_II_PROMOTER	-0.61584	0.538	0.593179	-0.269218	1.55898	0.119	0.327332	0.924453
HOMEOSTASIS_OF_NUMBER_OF_CELLS	-0.620392	0.535	0.590669	-0.271646	-0.579873	0.562	0.592457	-0.250264
ANTI_APOPTOSIS	-0.623433	0.533	0.589257	-0.273273	1.45381	0.146	0.353232	0.835647
AMINO_ACID_TRANSPORT	-0.628006	0.53	0.586734	-0.275724	-1.31951	0.187	0.379104	-0.728158
INDUCTION_OF_APOPTOSIS_BY_EXTRACELLULAR_SIGNALS	-0.629533	0.529	0.586422	-0.276544	-1.12403	0.261	0.429573	-0.583359
IMMUNE_RESPONSE	-0.631062	0.528	0.586109	-0.277366	-0.587303	0.557	0.588705	-0.254145
POSITIVE_REGULATION_OF_SECRETION	-0.634124	0.526	0.584683	-0.279014	1.43953	0.15	0.354191	0.823909
REGULATION_OF_JAK_STAT_CASCADE	-0.635657	0.525	0.584366	-0.279841	-0.623433	0.533	0.569975	-0.273273
REGULATION_OF_GENE_SPECIFIC_TRANSCRIPTION	-0.635657	0.525	0.584366	-0.279841	-0.848787	0.396	0.4902	-0.402305
TISSUE_DEVELOPMENT	-0.640266	0.522	0.582615	-0.282329	1.95148	0.051	0.254067	1.29243
MACROMOLECULE_LOCALIZATION	-0.640266	0.522	0.582615	-0.282329	-2.43857	0.0147455	0.173267	-1.83134
REGULATION_OF_DEVELOPMENTAL_PROCESS	-0.641805	0.521	0.582615	-0.283162	1.73354	0.083	0.304085	1.08092
PROTEIN_AMINO_ACID_PHOSPHORYLATION	-0.643345	0.52	0.582615	-0.283997	1.76836	0.077	0.297785	1.11351
REGULATION_OF_BINDING	-0.644888	0.519	0.582449	-0.284833	0.966088	0.334	0.458618	0.476254
POSITIVE_REGULATION_OF_RESPONSE_TO_STIMULUS	-0.654174	0.513	0.576508	-0.289883	-0.964092	0.335	0.45922	-0.474955
GLUCOSE_METABOLIC_PROCESS	-0.655727	0.512	0.576176	-0.29073	-1.12403	0.261	0.429573	-0.583359
POSITIVE_REGULATION_OF_T_CELL_PROLIFERATION	-0.655727	0.512	0.576176	-0.29073	-1.21334	0.225	0.4067	-0.647817
TRNA_METABOLIC_PROCESS	-0.658838	0.51	0.575511	-0.29243	-1.97737	0.048	0.246189	-1.31876
OLIGOSACCHARIDE_METABOLIC_PROCESS	-0.661955	0.508	0.574047	-0.294136	0.980174	0.327	0.455903	0.485452
MRNA_METABOLIC_PROCESS	-0.661955	0.508	0.574047	-0.294136	-2.8004	0.00510392	0.118021	-2.2921
ENERGY_RESERVE_METABOLIC_PROCESS	-0.665079	0.506	0.573373	-0.295849	1.04073	0.298	0.438677	0.525784
HOMOPHILIC_CELL_ADHESION	-0.666643	0.505	0.573035	-0.296709	2.29428	0.0217745	0.185299	1.66205
CELLULAR_LOCALIZATION	-0.668209	0.504	0.572695	-0.297569	-2.18984	0.0285362	0.200788	-1.5446
INTRACELLULAR_SIGNALING_CASCADE	-0.669777	0.503	0.572355	-0.298432	-0.334503	0.738	0.749933	-0.131944
TISSUE_MORPHOGENESIS	-0.671346	0.502	0.572014	-0.299296	0.787482	0.431	0.50565	0.365523
REGULATION_OF_TYROSINE_PHOSPHORYLATION_OF_STAT_PROTEIN	-0.672917	0.501	0.571672	-0.300162	-0.666643	0.505	0.553063	-0.296709
CELL_CELL_ADHESION	-0.676064	0.499	0.570186	-0.301899	2.88516	0.00391212	0.112878	2.40759
PHOSPHORYLATION	-0.676064	0.499	0.570186	-0.301899	2.29037	0.022	0.185299	1.65758
REGULATION_OF_PROTEIN_STABILITY	-0.676064	0.499	0.570186	-0.301899	0.868721	0.385	0.484661	0.414539
INTERLEUKIN_2_PRODUCTION	-0.67764	0.498	0.570186	-0.302771	1.16752	0.243	0.41796	0.614394
RHYTHMIC_PROCESS	-0.67764	0.498	0.570186	-0.302771	1.11232	0.266	0.429751	0.575118
NEGATIVE_REGULATION_OF_PROGRAMMED_CELL_DEATH	-0.679218	0.497	0.570186	-0.303644	1.49085	0.136	0.346143	0.866461
NEGATIVE_REGULATION_OF_APOPTOSIS	-0.680797	0.496	0.570186	-0.304518	1.369	0.171	0.366685	0.767004
SPERMATID_DIFFERENTIATION	-0.680797	0.496	0.570186	-0.304518	-0.909663	0.363	0.472247	-0.440093
NEGATIVE_REGULATION_OF_DEVELOPMENTAL_PROCESS	-0.682378	0.495	0.570186	-0.305395	1.93492	0.053	0.256219	1.27572
G_PROTEIN_SIGNALING_COUPLED_TO_CYCLIC_NUCLEOTIDE_SECOND_MESSENGER	-0.682378	0.495	0.570186	-0.305395	-0.680797	0.496	0.546135	-0.304518
DEFENSE_RESPONSE_TO_BACTERIUM	-0.682378	0.495	0.570186	-0.305395	-0.958124	0.338	0.460243	-0.471083
RIBOSOME_BIOGENESIS_AND_ASSEMBLY	-0.682378	0.495	0.570186	-0.305395	-3.17588	0.00149381	0.0972174	-2.8257
REGULATION_OF_CYTOKINE_BIOSYNTHETIC_PROCESS	-0.690309	0.49	0.569459	-0.309804	1.33768	0.181	0.378202	0.742321
DETECTION_OF_STIMULUS	-0.693493	0.488	0.567943	-0.31158	1.88819	0.059	0.270803	1.22915
CELL_MIGRATION	-0.695088	0.487	0.567588	-0.312471	2.29037	0.022	0.185299	1.65758
G_PROTEIN_SIGNALING_ADENYLATE_CYCLASE_ACTIVATING_PATHWAY	-0.698283	0.485	0.566064	-0.314258	-0.896473	0.37	0.475299	-0.431798
TRANSCRIPTION_FROM_RNA_POLYMERASE_III_PROMOTER	-0.698283	0.485	0.566064	-0.314258	-1.29303	0.196	0.386792	-0.707744
CELLULAR_COMPONENT_ASSEMBLY	-0.699884	0.484	0.566064	-0.315155	-3.06013	0.0022124	0.0972174	-2.65514
REGULATION_OF_CHROMOSOME_ORGANIZATION_AND_BIOGENESIS	-0.704695	0.481	0.563812	-0.317855	-1.02789	0.304	0.444308	-0.517126
NEGATIVE_REGULATION_OF_MYELOID_CELL_DIFFERENTIATION	-0.715986	0.474	0.556405	-0.324222	1.00895	0.313	0.44693	0.504456
ESTABLISHMENT_OF_CELLULAR_LOCALIZATION	-0.720853	0.471	0.553679	-0.326979	-2.09235	0.0364076	0.221977	-1.43881
ION_TRANSPORT	-0.722479	0.47	0.5533	-0.327902	1.22653	0.22	0.404836	0.657577
CARBOHYDRATE_BIOSYNTHETIC_PROCESS	-0.722479	0.47	0.5533	-0.327902	1.18252	0.237	0.417304	0.625252
REGULATION_OF_CYTOKINE_SECRETION	-0.725737	0.468	0.552538	-0.329754	1.32552	0.185	0.379104	0.732828
CELL_CYCLE_ARREST_GO_0007050	-0.727369	0.467	0.552155	-0.330683	1.19012	0.234	0.413805	0.630784
FATTY_ACID_OXIDATION	-0.730638	0.465	0.550587	-0.332547	1.45021	0.147	0.353232	0.832683
COFACTOR_TRANSPORT	-0.730638	0.465	0.550587	-0.332547	-1.84526	0.065	0.283984	-1.18709
REGULATION_OF_TRANSCRIPTION_FACTOR_ACTIVITY	-0.732276	0.464	0.550587	-0.333482	-0.560703	0.575	0.602276	-0.240332
REGULATION_OF_DNA_BINDING	-0.733916	0.463	0.550587	-0.334419	-1.07584	0.282	0.430643	-0.549751
MONOVALENT_INORGANIC_CATION_HOMEOSTASIS	-0.735558	0.462	0.550224	-0.335358	0.850585	0.395	0.489704	0.403403
GLUCOSAMINE_METABOLIC_PROCESS	-0.740494	0.459	0.54745	-0.338187	1.38845	0.165	0.365558	0.782516
DI___TRI_VALENT_INORGANIC_CATION_TRANSPORT	-0.742144	0.458	0.547056	-0.339135	1.08257	0.279	0.430643	0.554396
RESPONSE_TO_HORMONE_STIMULUS	-0.742144	0.458	0.547056	-0.339135	-0.818626	0.413	0.499883	-0.38405
MACROMOLECULAR_COMPLEX_ASSEMBLY	-0.74545	0.456	0.546264	-0.341035	-3.20452	0.00135286	0.0972174	-2.86875
POSITIVE_REGULATION_OF_T_CELL_ACTIVATION	-0.747105	0.455	0.545866	-0.341989	-0.666643	0.505	0.553063	-0.296709
RESPONSE_TO_BACTERIUM	-0.748763	0.454	0.545468	-0.342944	-0.784068	0.433	0.506096	-0.363512
POSITIVE_REGULATION_OF_MAP_KINASE_ACTIVITY	-0.750423	0.453	0.545068	-0.343902	-1.03643	0.3	0.440036	-0.522879
POSITIVE_REGULATION_OF_CYTOKINE_SECRETION	-0.752085	0.452	0.544667	-0.344862	1.369	0.171	0.366685	0.767004
HISTONE_MODIFICATION	-0.752085	0.452	0.544667	-0.344862	1.04505	0.296	0.437995	0.528708
NOTCH_SIGNALING_PATHWAY	-0.752085	0.452	0.544667	-0.344862	-0.785774	0.432	0.50565	-0.364516
SEXUAL_REPRODUCTION	-0.752085	0.452	0.544667	-0.344862	-1.16752	0.243	0.41796	-0.614394
PROTEIN_IMPORT	-0.752085	0.452	0.544667	-0.344862	-1.26464	0.206	0.395075	-0.686133
DEPHOSPHORYLATION	-0.755415	0.45	0.544667	-0.346787	1.97737	0.048	0.246189	1.31876
NUCLEAR_IMPORT	-0.760426	0.447	0.543451	-0.349692	-0.455152	0.649	0.6678	-0.187755
REGULATION_OF_PH	-0.762101	0.446	0.543043	-0.350665	0.865071	0.387	0.485446	0.412289
POSITIVE_REGULATION_OF_JNK_ACTIVITY	-0.762101	0.446	0.543043	-0.350665	-1.37866	0.168	0.366685	-0.774691
ESTABLISHMENT_OF_VESICLE_LOCALIZATION	-0.765456	0.444	0.542224	-0.352617	-1.76241	0.078	0.297785	-1.10791
ACTIVATION_OF_JNK_ACTIVITY	-0.770506	0.441	0.539367	-0.355561	-1.56749	0.117	0.324031	-0.931814
FEMALE_PREGNANCY	-0.772193	0.44	0.538951	-0.356547	1.40507	0.16	0.362105	0.79588
CYCLIC_NUCLEOTIDE_MEDIATED_SIGNALING	-0.772193	0.44	0.538951	-0.356547	-0.773883	0.439	0.508742	-0.357535
GLYCOLIPID_METABOLIC_PROCESS	-0.775575	0.438	0.538114	-0.358526	-0.654174	0.513	0.558828	-0.289883
GLAND_DEVELOPMENT	-0.784068	0.433	0.532773	-0.363512	-0.944332	0.345	0.465703	-0.462181
PROTEIN_TARGETING_TO_MITOCHONDRION	-0.784068	0.433	0.532773	-0.363512	-2.72794	0.00637307	0.118336	-2.19565
CELLULAR_PROTEIN_COMPLEX_ASSEMBLY	-0.785774	0.432	0.532773	-0.364516	-2.06419	0.039	0.227593	-1.40894
LYSOSOMAL_TRANSPORT	-0.787482	0.431	0.532719	-0.365523	2.13025	0.033151	0.209956	1.4795
ACTIVATION_OF_MAPK_ACTIVITY	-0.790904	0.429	0.53105	-0.367543	-1.41865	0.156	0.359297	-0.806875
ESTABLISHMENT_OF_LOCALIZATION	-0.796055	0.426	0.529376	-0.37059	-1.59371	0.111	0.319944	-0.954677
MONOVALENT_INORGANIC_CATION_TRANSPORT	-0.799501	0.424	0.528061	-0.372634	1.66456	0.096	0.318829	1.01773
FATTY_ACID_BETA_OXIDATION	-0.799501	0.424	0.528061	-0.372634	1.36263	0.173	0.367119	0.761954
PURINE_NUCLEOTIDE_METABOLIC_PROCESS	-0.799501	0.424	0.528061	-0.372634	-1.80548	0.071	0.287163	-1.14874
PHAGOCYTOSIS	-0.801227	0.423	0.528061	-0.37366	0.972102	0.331	0.458351	0.480172
POSITIVE_REGULATION_OF_CATALYTIC_ACTIVITY	-0.801227	0.423	0.528061	-0.37366	-2.04224	0.0411279	0.233344	-1.38586
AMINE_TRANSPORT	-0.802956	0.422	0.528061	-0.374688	-0.643345	0.52	0.561958	-0.283997
POSITIVE_REGULATION_OF_PROTEIN_SECRETION	-0.806421	0.42	0.528061	-0.376751	1.35005	0.177	0.372704	0.752027
CELLULAR_POLYSACCHARIDE_METABOLIC_PROCESS	-0.808157	0.419	0.528061	-0.377786	1.67978	0.093	0.316588	1.03152
ENZYME_LINKED_RECEPTOR_PROTEIN_SIGNALING_PATHWAY	-0.811637	0.417	0.526567	-0.379864	1.18504	0.236	0.416441	0.627088
REGULATION_OF_CELL_PROLIFERATION	-0.811637	0.417	0.526567	-0.379864	-1.09618	0.273	0.429751	-0.563837
PURINE_RIBONUCLEOTIDE_METABOLIC_PROCESS	-0.81338	0.416	0.526567	-0.380907	-1.09618	0.273	0.429751	-0.563837
NEUROGENESIS	-0.815126	0.415	0.526483	-0.381952	1.3722	0.17	0.366685	0.769551
PROTEIN_MODIFICATION_PROCESS	-0.815126	0.415	0.526483	-0.381952	-0.140835	0.888	0.888	-0.051587
POSITIVE_REGULATION_OF_LYMPHOCYTE_ACTIVATION	-0.818626	0.413	0.526398	-0.38405	-0.637192	0.524	0.564375	-0.280669
MRNA_PROCESSING_GO_0006397	-0.818626	0.413	0.526398	-0.38405	-2.63821	0.00833443	0.136185	-2.07912
NEGATIVE_REGULATION_OF_CELL_DIFFERENTIATION	-0.820379	0.412	0.526398	-0.385103	2.22738	0.0259218	0.196864	1.58634
FEMALE_GAMETE_GENERATION	-0.822135	0.411	0.526312	-0.386158	-0.733916	0.463	0.522474	-0.334419
AMINO_SUGAR_METABOLIC_PROCESS	-0.830953	0.406	0.520725	-0.391474	1.52604	0.127	0.33579	0.896196
REGULATION_OF_ACTION_POTENTIAL	-0.830953	0.406	0.520725	-0.391474	-0.750423	0.453	0.517737	-0.343902
CARBOXYLIC_ACID_TRANSPORT	-0.832725	0.405	0.520725	-0.392545	-1.54643	0.122	0.327332	-0.91364
T_CELL_PROLIFERATION	-0.834499	0.404	0.520725	-0.393619	-0.693493	0.488	0.541707	-0.31158
POSITIVE_REGULATION_OF_CELL_DIFFERENTIATION	-0.838055	0.402	0.519674	-0.395774	0.917272	0.359	0.470791	0.444906
RESPONSE_TO_VIRUS	-0.838055	0.402	0.519674	-0.395774	-0.934589	0.35	0.465717	-0.455932
NUCLEAR_TRANSPORT	-0.838055	0.402	0.519674	-0.395774	-1.52604	0.127	0.33579	-0.896196
REGULATION_OF_SYNAPSE_STRUCTURE_AND_ACTIVITY	-0.839837	0.401	0.519674	-0.396856	-0.690309	0.49	0.542453	-0.309804
REGULATION_OF_GENE_EXPRESSION	-0.843409	0.399	0.519081	-0.399027	-0.861432	0.389	0.485953	-0.41005
SMOOTH_MUSCLE_CONTRACTION_GO_0006939	-0.846991	0.397	0.518129	-0.401209	-0.658838	0.51	0.557045	-0.29243
NUCLEOCYTOPLASMIC_TRANSPORT	-0.846991	0.397	0.518129	-0.401209	-1.57179	0.116	0.324031	-0.935542
POLYSACCHARIDE_METABOLIC_PROCESS	-0.848787	0.396	0.518129	-0.402305	1.81842	0.069	0.287163	1.16115
RESPONSE_TO_ORGANIC_SUBSTANCE	-0.848787	0.396	0.518129	-0.402305	-0.785774	0.432	0.50565	-0.364516
RESPONSE_TO_OTHER_ORGANISM	-0.848787	0.396	0.518129	-0.402305	-1.16258	0.245	0.418712	-0.610834
VACUOLAR_TRANSPORT	-0.850585	0.395	0.518129	-0.403403	1.39505	0.163	0.364852	0.787812
CYTOKINE_METABOLIC_PROCESS	-0.850585	0.395	0.518129	-0.403403	1.32854	0.184	0.37866	0.735182
ORGANIC_ACID_TRANSPORT	-0.850585	0.395	0.518129	-0.403403	-1.66959	0.095	0.316796	-1.02228
RESPONSE_TO_HYPOXIA	-0.852386	0.394	0.518129	-0.404504	-0.896473	0.37	0.475299	-0.431798
REGULATION_OF_VIRAL_REPRODUCTION	-0.85419	0.393	0.518129	-0.405607	-1.54643	0.122	0.327332	-0.91364
ER_TO_GOLGI_VESICLE_MEDIATED_TRANSPORT	-0.855996	0.392	0.518129	-0.406714	1.01522	0.31	0.446684	0.508638
INTERFERON_GAMMA_BIOSYNTHETIC_PROCESS	-0.855996	0.392	0.518129	-0.406714	-1.03643	0.3	0.440036	-0.522879
UNFOLDED_PROTEIN_RESPONSE	-0.857805	0.391	0.518129	-0.407823	1.08935	0.276	0.430163	0.559091
EPIDERMAL_GROWTH_FACTOR_RECEPTOR_SIGNALING_PATHWAY	-0.859617	0.39	0.518129	-0.408935	1.61183	0.107	0.319696	0.970616
ISOPRENOID_METABOLIC_PROCESS	-0.861432	0.389	0.518129	-0.41005	-0.902107	0.367	0.474429	-0.435334
GLYCOSPHINGOLIPID_METABOLIC_PROCESS	-0.86325	0.388	0.518129	-0.411168	-0.748763	0.454	0.517737	-0.342944
ADENYLATE_CYCLASE_ACTIVATION	-0.86325	0.388	0.518129	-0.411168	-1.17499	0.24	0.41796	-0.619789
DEVELOPMENT_OF_PRIMARY_SEXUAL_CHARACTERISTICS	-0.868721	0.385	0.518129	-0.414539	-0.730638	0.465	0.524007	-0.332547
MICROTUBULE_BASED_MOVEMENT	-0.872382	0.383	0.518129	-0.416801	-0.86325	0.388	0.485446	-0.411168
SPHINGOLIPID_METABOLIC_PROCESS	-0.874217	0.382	0.518129	-0.417937	0.924934	0.355	0.467798	0.449772
STRIATED_MUSCLE_DEVELOPMENT	-0.874217	0.382	0.518129	-0.417937	-0.646431	0.518	0.561281	-0.28567
G_PROTEIN_SIGNALING_ADENYLATE_CYCLASE_INHIBITING_PATHWAY	-0.874217	0.382	0.518129	-0.417937	-1.22387	0.221	0.404836	-0.655608
COVALENT_CHROMATIN_MODIFICATION	-0.883437	0.377	0.516794	-0.423659	0.841621	0.4	0.491429	0.39794
LIPID_METABOLIC_PROCESS	-0.883437	0.377	0.516794	-0.423659	-1.02154	0.307	0.445504	-0.512862
TRNA_PROCESSING	-0.883437	0.377	0.516794	-0.423659	-2.26617	0.0234408	0.191511	-1.63003
NUCLEOTIDE_SUGAR_METABOLIC_PROCESS	-0.887147	0.375	0.516653	-0.425969	1.11465	0.265	0.429573	0.576754
PRODUCTION_OF_MOLECULAR_MEDIATOR_OF_IMMUNE_RESPONSE	-0.890868	0.373	0.515636	-0.428291	0.966088	0.334	0.458618	0.476254
RESPONSE_TO_IONIZING_RADIATION	-0.890868	0.373	0.515636	-0.428291	-1.02154	0.307	0.445504	-0.512862
REGULATION_OF_AXONOGENESIS	-0.892733	0.372	0.515636	-0.429457	1.66959	0.095	0.316796	1.02228
REGULATION_OF_INTERFERON_GAMMA_BIOSYNTHETIC_PROCESS	-0.892733	0.372	0.515636	-0.429457	-1.00686	0.314	0.44693	-0.50307
NEUROTRANSMITTER_SECRETION	-0.892733	0.372	0.515636	-0.429457	-1.29303	0.196	0.386792	-0.707744
POSITIVE_REGULATION_OF_TRANSCRIPTION_FROM_RNA_POLYMERASE_II_PROMOTER	-0.902107	0.367	0.511671	-0.435334	1.33462	0.182	0.37866	0.739929
GAMETE_GENERATION	-0.902107	0.367	0.511671	-0.435334	-1.43601	0.151	0.355524	-0.821023
CYTOKINE_BIOSYNTHETIC_PROCESS	-0.903991	0.366	0.511671	-0.436519	1.33157	0.183	0.37866	0.737549
REGULATION_OF_PROGRAMMED_CELL_DEATH	-0.905879	0.365	0.511501	-0.437707	-0.411099	0.681	0.697214	-0.166853
VIRAL_INFECTIOUS_CYCLE	-0.905879	0.365	0.511501	-0.437707	-1.27871	0.201	0.390993	-0.696804
PHOTORECEPTOR_CELL_MAINTENANCE	-0.909663	0.363	0.510449	-0.440093	1.68494	0.092	0.316588	1.03621
STEROID_HORMONE_RECEPTOR_SIGNALING_PATHWAY	-0.909663	0.363	0.510449	-0.440093	-1.02154	0.307	0.445504	-0.512862
CATION_TRANSPORT	-0.915365	0.36	0.50974	-0.443697	2.06419	0.039	0.227593	1.40894
SUPEROXIDE_METABOLIC_PROCESS	-0.917272	0.359	0.509207	-0.444906	-1.04505	0.296	0.437995	-0.528708
RESPIRATORY_GASEOUS_EXCHANGE	-0.919183	0.358	0.508671	-0.446117	-1.52204	0.128	0.336257	-0.89279
GENERATION_OF_NEURONS	-0.921097	0.357	0.508671	-0.447332	1.41183	0.158	0.359571	0.801343
FATTY_ACID_BIOSYNTHETIC_PROCESS	-0.921097	0.357	0.508671	-0.447332	-2.18349	0.029	0.200788	-1.5376
NEGATIVE_REGULATION_OF_CELL_ADHESION	-0.923014	0.356	0.508671	-0.44855	1.57179	0.116	0.324031	0.935542
REGULATION_OF_PEPTIDYL_TYROSINE_PHOSPHORYLATION	-0.926859	0.354	0.508292	-0.450997	0.865071	0.387	0.485446	0.412289
INTERFERON_GAMMA_PRODUCTION	-0.926859	0.354	0.508292	-0.450997	-1.09162	0.275	0.430163	-0.560667
NUCLEOTIDE_BIOSYNTHETIC_PROCESS	-0.928786	0.353	0.508292	-0.452225	-1.13351	0.257	0.429384	-0.590067
RNA_PROCESSING	-0.932651	0.351	0.508292	-0.454693	-3.43293	0.000597092	0.0834937	-3.22396
S_PHASE_OF_MITOTIC_CELL_CYCLE	-0.936531	0.349	0.507354	-0.457175	1.15035	0.25	0.421134	0.60206
RESPONSE_TO_HEAT	-0.938476	0.348	0.507354	-0.458421	-1.83167	0.067	0.285099	-1.17393
COENZYME_BIOSYNTHETIC_PROCESS	-0.940424	0.347	0.507354	-0.459671	-1.61644	0.106	0.319696	-0.974694
MAINTENANCE_OF_LOCALIZATION	-0.942376	0.346	0.507354	-0.460924	-2.48976	0.0127831	0.163184	-1.89337
G_PROTEIN_SIGNALING_COUPLED_TO_CAMP_NUCLEOTIDE_SECOND_MESSENGER	-0.946291	0.344	0.506393	-0.463442	0.986271	0.324	0.454666	0.489455
N_ACETYLGLUCOSAMINE_METABOLIC_PROCESS	-0.950221	0.342	0.504357	-0.465974	1.80548	0.071	0.287163	1.14874
CAMP_MEDIATED_SIGNALING	-0.950221	0.342	0.504357	-0.465974	0.980174	0.327	0.455903	0.485452
REGULATION_OF_TRANSFORMING_GROWTH_FACTOR_BETA_RECEPTOR_SIGNALING_PATHWAY	-0.952191	0.341	0.504357	-0.467246	-1.08032	0.28	0.430643	-0.552842
PHOSPHOLIPASE_C_ACTIVATION	-0.952191	0.341	0.504357	-0.467246	-1.17749	0.239	0.41796	-0.621602
RESPONSE_TO_CARBOHYDRATE_STIMULUS	-0.952191	0.341	0.504357	-0.467246	-1.42554	0.154	0.358456	-0.812479
REGULATION_OF_APOPTOSIS	-0.958124	0.338	0.503916	-0.471083	-0.413828	0.679	0.696039	-0.16813
CYTOKINE_PRODUCTION	-0.970093	0.332	0.496784	-0.478862	1.56749	0.117	0.324031	0.931814
INTRACELLULAR_RECEPTOR_MEDIATED_SIGNALING_PATHWAY	-0.974114	0.33	0.494697	-0.481486	-1.05156	0.293	0.437995	-0.533132
RESPONSE_TO_NUTRIENT	-0.97613	0.329	0.494105	-0.482804	-1.12639	0.26	0.429573	-0.585027
LIPID_TRANSPORT	-0.986271	0.324	0.488391	-0.489455	1.10076	0.271	0.429751	0.567031
NEURON_DEVELOPMENT	-0.994458	0.32	0.486853	-0.49485	1.22387	0.221	0.404836	0.655608
DETECTION_OF_ABIOTIC_STIMULUS	-0.998576	0.318	0.485619	-0.497573	1.00064	0.317	0.450416	0.498941
BIOPOLYMER_MODIFICATION	-0.998576	0.318	0.485619	-0.497573	-0.218551	0.827	0.830048	-0.0824945
CELLULAR_COMPONENT_DISASSEMBLY	-0.998576	0.318	0.485619	-0.497573	-1.49467	0.135	0.345752	-0.869666
TRANSMEMBRANE_RECEPTOR_PROTEIN_TYROSINE_KINASE_SIGNALING_PATHWAY	-1.00271	0.316	0.485286	-0.500313	2.30798	0.021	0.184484	1.67778
METAL_ION_TRANSPORT	-1.00479	0.315	0.484661	-0.501689	1.69015	0.091	0.316588	1.04096
REGULATION_OF_NEUROGENESIS	-1.00479	0.315	0.484661	-0.501689	-0.747105	0.455	0.517737	-0.341989
SECRETORY_PATHWAY	-1.00686	0.314	0.484661	-0.50307	-1.8735	0.061	0.273805	-1.21467
NEGATIVE_REGULATION_OF_RESPONSE_TO_STIMULUS	-1.01103	0.312	0.484661	-0.505845	-1.04289	0.297	0.437995	-0.527244
PROTEIN_METABOLIC_PROCESS	-1.01522	0.31	0.48334	-0.508638	-1.79283	0.073	0.292358	-1.13668
REGULATION_OF_DEFENSE_RESPONSE	-1.01732	0.309	0.482702	-0.510042	-0.717606	0.473	0.530097	-0.325139
NEUTRAL_AMINO_ACID_TRANSPORT	-1.01732	0.309	0.482702	-0.510042	-1.22387	0.221	0.404836	-0.655608
REGULATION_OF_SIGNAL_TRANSDUCTION	-1.01943	0.308	0.482702	-0.511449	1.97737	0.048	0.246189	1.31876
PROTEIN_IMPORT_INTO_NUCLEUS	-1.01943	0.308	0.482702	-0.511449	-0.652622	0.514	0.559172	-0.289037
LOCOMOTORY_BEHAVIOR	-1.02154	0.307	0.482702	-0.512862	1.01732	0.309	0.44603	0.510042
REGULATION_OF_IMMUNE_SYSTEM_PROCESS	-1.02577	0.305	0.481052	-0.5157	-0.735558	0.462	0.522474	-0.335358
POSITIVE_REGULATION_OF_CELL_PROLIFERATION	-1.02577	0.305	0.481052	-0.5157	-1.65957	0.097	0.319552	-1.01323
POSITIVE_REGULATION_OF_CELLULAR_COMPONENT_ORGANIZATION_AND_BIOGENESIS	-1.03429	0.301	0.478167	-0.521434	-0.936531	0.349	0.465717	-0.457175
CALCIUM_MEDIATED_SIGNALING	-1.03643	0.3	0.477778	-0.522879	-1.55477	0.12	0.327332	-0.920819
REGULATION_OF_RESPONSE_TO_STIMULUS	-1.04073	0.298	0.47552	-0.525784	-1.23993	0.215	0.401039	-0.667562
CELLULAR_CARBOHYDRATE_METABOLIC_PROCESS	-1.04289	0.297	0.47552	-0.527244	-0.785774	0.432	0.50565	-0.364516
RESPONSE_TO_BIOTIC_STIMULUS	-1.04289	0.297	0.47552	-0.527244	-1.05593	0.291	0.437995	-0.536107
STEROID_METABOLIC_PROCESS	-1.04505	0.296	0.47552	-0.528708	-1.58047	0.114	0.323396	-0.943095
POSITIVE_REGULATION_OF_EPITHELIAL_CELL_PROLIFERATION	-1.04939	0.294	0.47552	-0.531653	-1.00686	0.314	0.44693	-0.50307
INSULIN_RECEPTOR_SIGNALING_PATHWAY	-1.05374	0.292	0.475227	-0.534617	2.61205	0.009	0.144176	2.04576
VITAMIN_TRANSPORT	-1.05593	0.291	0.474545	-0.536107	-1.27587	0.202	0.391076	-0.694649
LYSOSOME_ORGANIZATION_AND_BIOGENESIS	-1.05812	0.29	0.47386	-0.537602	-1.30176	0.193	0.384588	-0.714443
POTASSIUM_ION_TRANSPORT	-1.06252	0.288	0.471535	-0.540608	-0.591777	0.554	0.586293	-0.25649
MULTICELLULAR_ORGANISMAL_DEVELOPMENT	-1.06473	0.287	0.471535	-0.542118	3.29053	0.001	0.0834937	3
PROTEIN_TARGETING	-1.06694	0.286	0.471093	-0.543634	-2.25338	0.0242352	0.192235	-1.61555
ADAPTIVE_IMMUNE_RESPONSE_GO_0002460	-1.07138	0.284	0.468743	-0.546682	1.7392	0.082	0.301775	1.08619
INNATE_IMMUNE_RESPONSE	-1.07138	0.284	0.468743	-0.546682	-0.609791	0.542	0.576581	-0.266001
EPITHELIAL_TO_MESENCHYMAL_TRANSITION	-1.07138	0.284	0.468743	-0.546682	-1.58927	0.112	0.319944	-0.950782
MACROMOLECULE_CATABOLIC_PROCESS	-1.07808	0.281	0.46828	-0.551294	-3.0464	0.00231602	0.0972174	-2.63526
PROTEIN_FOLDING	-1.07808	0.281	0.46828	-0.551294	-3.07869	0.00207911	0.0972174	-2.68212
RNA_EXPORT_FROM_NUCLEUS	-1.08032	0.28	0.46828	-0.552842	-2.83272	0.00461541	0.118021	-2.33579
ADAPTIVE_IMMUNE_RESPONSE	-1.08257	0.279	0.468055	-0.554396	1.7007	0.089	0.313418	1.05061
GLUCAN_METABOLIC_PROCESS	-1.08708	0.277	0.466616	-0.55752	1.59819	0.11	0.319944	0.958607
CARBOHYDRATE_TRANSPORT	-1.09162	0.275	0.466131	-0.560667	-0.704695	0.481	0.534663	-0.317855
NITROGEN_COMPOUND_METABOLIC_PROCESS	-1.09847	0.272	0.462967	-0.565431	-2.32778	0.0199238	0.181556	-1.70063
AMINO_ACID_METABOLIC_PROCESS	-1.09847	0.272	0.462967	-0.565431	-2.51747	0.0118202	0.160417	-1.92738
NEGATIVE_REGULATION_OF_METABOLIC_PROCESS	-1.10306	0.27	0.461485	-0.568636	-0.293683	0.769	0.777566	-0.114074
NEGATIVE_REGULATION_OF_TRANSCRIPTION	-1.10768	0.268	0.459992	-0.571865	-0.608283	0.543	0.576893	-0.2652
ENERGY_DERIVATION_BY_OXIDATION_OF_ORGANIC_COMPOUNDS	-1.10768	0.268	0.459992	-0.571865	-1.42209	0.155	0.359297	-0.809668
POST_TRANSLATIONAL_PROTEIN_MODIFICATION	-1.11232	0.266	0.458485	-0.575118	1.8663	0.062	0.273805	1.20761
VACUOLE_ORGANIZATION_AND_BIOGENESIS	-1.11232	0.266	0.458485	-0.575118	-1.41523	0.157	0.359297	-0.8041
ECTODERM_DEVELOPMENT	-1.11699	0.264	0.458485	-0.578396	1.41523	0.157	0.359297	0.8041
NEUROPEPTIDE_SIGNALING_PATHWAY	-1.12403	0.261	0.454663	-0.583359	-1.17249	0.241	0.41796	-0.617983
POSITIVE_REGULATION_OF_DEVELOPMENTAL_PROCESS	-1.12639	0.26	0.454663	-0.585027	1.29884	0.194	0.38564	0.712198
INTERLEUKIN_8_BIOSYNTHETIC_PROCESS	-1.13351	0.257	0.450577	-0.590067	1.10537	0.269	0.429751	0.570248
NEGATIVE_REGULATION_OF_CELLULAR_METABOLIC_PROCESS	-1.13351	0.257	0.450577	-0.590067	-0.322598	0.747	0.757195	-0.126679
MULTI_ORGANISM_PROCESS	-1.1359	0.256	0.450577	-0.59176	1.16505	0.244	0.418712	0.61261
INTERLEUKIN_8_PRODUCTION	-1.1359	0.256	0.450577	-0.59176	0.994458	0.32	0.453102	0.49485
PROTEIN_AMINO_ACID_AUTOPHOSPHORYLATION	-1.14069	0.254	0.450148	-0.595166	1.11	0.267	0.429751	0.573489
NEGATIVE_REGULATION_OF_CELLULAR_BIOSYNTHETIC_PROCESS	-1.14069	0.254	0.450148	-0.595166	-1.11933	0.263	0.429573	-0.580044
PROTEIN_AMINO_ACID_ADP_RIBOSYLATION	-1.14551	0.252	0.449528	-0.598599	-2.01409	0.044	0.238066	-1.35655
REPRODUCTION	-1.14792	0.251	0.449528	-0.600326	-0.986271	0.324	0.454666	-0.489455
RESPONSE_TO_EXTERNAL_STIMULUS	-1.15035	0.25	0.449528	-0.60206	-0.268909	0.788	0.795792	-0.103474
SKELETAL_DEVELOPMENT	-1.15278	0.249	0.449528	-0.603801	1.63048	0.103	0.319696	0.987163
MAINTENANCE_OF_CELLULAR_LOCALIZATION	-1.17	0.242	0.446307	-0.616185	-1.75069	0.08	0.299817	-1.09691
PROTEIN_AUTOPROCESSING	-1.17249	0.241	0.445468	-0.617983	1.09618	0.273	0.429751	0.563837
MEMBRANE_LIPID_METABOLIC_PROCESS	-1.17749	0.239	0.442773	-0.621602	-1.46106	0.144	0.353232	-0.841638
RNA_SPLICING	-1.18252	0.237	0.441068	-0.625252	-2.7102	0.00672418	0.120065	-2.17236
SULFUR_METABOLIC_PROCESS	-1.18504	0.236	0.441068	-0.627088	-0.584327	0.559	0.590056	-0.252588
PHOSPHOLIPID_METABOLIC_PROCESS	-1.18504	0.236	0.441068	-0.627088	-2.09396	0.0362637	0.221977	-1.44053
REGULATION_OF_CYTOKINE_PRODUCTION	-1.19779	0.231	0.435733	-0.636388	0.898348	0.369	0.475299	0.432974
RESPONSE_TO_EXTRACELLULAR_STIMULUS	-1.20294	0.229	0.433086	-0.640165	-1.75069	0.08	0.299817	-1.09691
CELLULAR_LIPID_CATABOLIC_PROCESS	-1.20553	0.228	0.432195	-0.642065	0.905879	0.365	0.473341	0.437707
REGULATION_OF_IMMUNE_EFFECTOR_PROCESS	-1.21073	0.226	0.4294	-0.645892	-0.60076	0.548	0.581449	-0.261219
MAINTENANCE_OF_CELLULAR_PROTEIN_LOCALIZATION	-1.21073	0.226	0.4294	-0.645892	-1.67466	0.094	0.316796	-1.02687
HEART_DEVELOPMENT	-1.21596	0.224	0.42859	-0.649752	1.72238	0.085	0.305925	1.07058
AXON_GUIDANCE	-1.21596	0.224	0.42859	-0.649752	1.58927	0.112	0.319944	0.950782
POSITIVE_REGULATION_OF_IMMUNE_SYSTEM_PROCESS	-1.21859	0.223	0.42859	-0.651695	1.08032	0.28	0.430643	0.552842
ELECTRON_TRANSPORT_GO_0006118	-1.22123	0.222	0.42859	-0.653647	-1.93492	0.053	0.256219	-1.27572
TRANSCRIPTION_INITIATION	-1.22387	0.221	0.42859	-0.655608	-0.775575	0.438	0.508742	-0.358526
NEURITE_DEVELOPMENT	-1.22653	0.22	0.427952	-0.657577	1.06473	0.287	0.435026	0.542118
CELLULAR_MACROMOLECULE_CATABOLIC_PROCESS	-1.22919	0.219	0.427024	-0.659556	-2.6878	0.00719247	0.120065	-2.14312
LIPID_CATABOLIC_PROCESS	-1.23186	0.218	0.426091	-0.661544	0.96011	0.337	0.459648	0.47237
NEGATIVE_REGULATION_OF_BIOSYNTHETIC_PROCESS	-1.23186	0.218	0.426091	-0.661544	-1.04289	0.297	0.437995	-0.527244
RIBONUCLEOTIDE_METABOLIC_PROCESS	-1.23454	0.217	0.426091	-0.66354	-0.87974	0.379	0.480067	-0.421361
POSITIVE_REGULATION_OF_CYTOKINE_PRODUCTION	-1.23723	0.216	0.426091	-0.665546	1.36263	0.173	0.367119	0.761954
RESPONSE_TO_STEROID_HORMONE_STIMULUS	-1.24264	0.214	0.423337	-0.669586	-0.830953	0.406	0.495078	-0.391474
MONOCARBOXYLIC_ACID_METABOLIC_PROCESS	-1.24536	0.213	0.423337	-0.67162	-0.706303	0.48	0.534663	-0.318759
NITROGEN_COMPOUND_CATABOLIC_PROCESS	-1.24536	0.213	0.423337	-0.67162	-1.41523	0.157	0.359297	-0.8041
PROTEIN_EXPORT_FROM_NUCLEUS	-1.24536	0.213	0.423337	-0.67162	-1.93492	0.053	0.256219	-1.27572
AMINO_ACID_AND_DERIVATIVE_METABOLIC_PROCESS	-1.24536	0.213	0.423337	-0.67162	-2.6874	0.00720097	0.120065	-2.14261
MICROTUBULE_POLYMERIZATION_OR_DEPOLYMERIZATION	-1.25082	0.211	0.423337	-0.675718	-0.97613	0.329	0.457131	-0.482804
AMINE_CATABOLIC_PROCESS	-1.26464	0.206	0.417623	-0.686133	-1.17499	0.24	0.41796	-0.619789
ACTIVATION_OF_PROTEIN_KINASE_ACTIVITY	-1.26743	0.205	0.416629	-0.688246	-0.930717	0.352	0.4661	-0.453457
AMINO_ACID_CATABOLIC_PROCESS	-1.26743	0.205	0.416629	-0.688246	-1.21073	0.226	0.4067	-0.645892
RESPONSE_TO_NUTRIENT_LEVELS	-1.27305	0.203	0.415667	-0.692504	-1.45381	0.146	0.353232	-0.835647
CELL_SURFACE_RECEPTOR_LINKED_SIGNAL_TRANSDUCTION_GO_0007166	-1.27587	0.202	0.414658	-0.694649	-0.36381	0.716	0.729392	-0.145087
DEVELOPMENTAL_GROWTH	-1.27871	0.201	0.414658	-0.696804	-1.22387	0.221	0.404836	-0.655608
ER_NUCLEAR_SIGNALING_PATHWAY	-1.28155	0.2	0.414658	-0.69897	0.857805	0.391	0.486221	0.407823
FATTY_ACID_METABOLIC_PROCESS	-1.28155	0.2	0.414658	-0.69897	-0.687131	0.492	0.542462	-0.308035
RESPONSE_TO_OXIDATIVE_STRESS	-1.28155	0.2	0.414658	-0.69897	-1.72793	0.084	0.305013	-1.07572
BIOPOLYMER_CATABOLIC_PROCESS	-1.28727	0.198	0.414658	-0.703335	-2.82923	0.00466608	0.118021	-2.33105
MAINTENANCE_OF_PROTEIN_LOCALIZATION	-1.31652	0.188	0.39999	-0.725842	-1.83167	0.067	0.285099	-1.17393
ANATOMICAL_STRUCTURE_DEVELOPMENT	-1.32251	0.186	0.397806	-0.730487	3.29053	0.001	0.0834937	3
PHOSPHOINOSITIDE_METABOLIC_PROCESS	-1.32251	0.186	0.397806	-0.730487	-0.936531	0.349	0.465717	-0.457175
AMINE_METABOLIC_PROCESS	-1.32854	0.184	0.396644	-0.735182	-2.37944	0.0173388	0.175574	-1.76098
NUCLEAR_EXPORT	-1.34384	0.179	0.392072	-0.747147	-2.35153	0.0186964	0.175574	-1.72824
NUCLEOTIDE_METABOLIC_PROCESS	-1.35317	0.176	0.388627	-0.754487	-1.42554	0.154	0.358456	-0.812479
AEROBIC_RESPIRATION	-1.35631	0.175	0.387466	-0.756962	-2.37582	0.0175098	0.175574	-1.75672
CATABOLIC_PROCESS	-1.35631	0.175	0.387466	-0.756962	-2.845	0.00444114	0.118021	-2.35251
SIGNAL_TRANSDUCTION	-1.35946	0.174	0.387351	-0.759451	-0.235269	0.814	0.818005	-0.0893756
POSITIVE_REGULATION_OF_CELLULAR_PROTEIN_METABOLIC_PROCESS	-1.35946	0.174	0.387351	-0.759451	-0.537387	0.591	0.616663	-0.228413
REGULATION_OF_G_PROTEIN_COUPLED_RECEPTOR_PROTEIN_SIGNALING_PATHWAY	-1.369	0.171	0.387351	-0.767004	1.32251	0.186	0.379104	0.730487
ACTIVATION_OF_IMMUNE_RESPONSE	-1.369	0.171	0.387351	-0.767004	-0.846991	0.397	0.490694	-0.401209
CYTOKINE_AND_CHEMOKINE_MEDIATED_SIGNALING_PATHWAY	-1.3722	0.17	0.387351	-0.769551	0.934589	0.35	0.465717	0.455932
CERAMIDE_METABOLIC_PROCESS	-1.38191	0.167	0.383256	-0.777284	0.775575	0.438	0.508742	0.358526
POSITIVE_REGULATION_OF_PEPTIDYL_TYROSINE_PHOSPHORYLATION	-1.38517	0.166	0.382034	-0.779892	-1.78046	0.075	0.296014	-1.12494
NEGATIVE_REGULATION_OF_BINDING	-1.39505	0.163	0.380489	-0.787812	-1.01732	0.309	0.44603	-0.510042
CELLULAR_CATABOLIC_PROCESS	-1.39838	0.162	0.379238	-0.790485	-2.70018	0.0069303	0.120065	-2.15925
PROTEOLYSIS	-1.40172	0.161	0.379238	-0.793174	-0.887147	0.375	0.47722	-0.425969
REGULATION_OF_CELLULAR_METABOLIC_PROCESS	-1.40507	0.16	0.379238	-0.79588	-0.820379	0.412	0.499412	-0.385103
REGULATION_OF_PROTEIN_AMINO_ACID_PHOSPHORYLATION	-1.40844	0.159	0.379238	-0.798603	1.15278	0.249	0.421134	0.603801
S_PHASE	-1.41183	0.158	0.379238	-0.801343	0.898348	0.369	0.475299	0.432974
POSITIVE_REGULATION_OF_PROTEIN_METABOLIC_PROCESS	-1.41865	0.156	0.377077	-0.806875	-0.620392	0.535	0.571366	-0.271646
NEGATIVE_REGULATION_OF_DNA_BINDING	-1.42209	0.155	0.375772	-0.809668	-0.932651	0.351	0.4661	-0.454693
NUCLEOTIDE_EXCISION_REPAIR	-1.42209	0.155	0.375772	-0.809668	-1.23993	0.215	0.401039	-0.667562
TRIACYLGLYCEROL_METABOLIC_PROCESS	-1.42554	0.154	0.375772	-0.812479	-2.0674	0.0386963	0.227593	-1.41233
REGULATION_OF_IMMUNE_RESPONSE	-1.42901	0.153	0.375772	-0.815309	1.11699	0.264	0.429573	0.578396
RRNA_PROCESSING	-1.42901	0.153	0.375772	-0.815309	-3.13617	0.00171169	0.0972174	-2.76657
NEGATIVE_REGULATION_OF_TRANSCRIPTION_FACTOR_ACTIVITY	-1.4325	0.152	0.375772	-0.818156	1.08935	0.276	0.430163	0.559091
REGULATION_OF_PROTEIN_IMPORT_INTO_NUCLEUS	-1.4325	0.152	0.375772	-0.818156	-1.36581	0.172	0.366903	-0.764472
CELLULAR_LIPID_METABOLIC_PROCESS	-1.43601	0.151	0.375772	-0.821023	-2.22287	0.0262248	0.196864	-1.58129
RRNA_METABOLIC_PROCESS	-1.43601	0.151	0.375772	-0.821023	-3.01543	0.00256613	0.0982953	-2.59072
CELL_FATE_COMMITMENT	-1.44307	0.149	0.375772	-0.826814	-0.638728	0.523	0.564375	-0.281498
CELLULAR_RESPONSE_TO_EXTRACELLULAR_STIMULUS	-1.44307	0.149	0.375772	-0.826814	-1.68494	0.092	0.316588	-1.03621
REGULATION_OF_PHOSPHORYLATION	-1.44663	0.148	0.375772	-0.829738	2.07485	0.038	0.226613	1.42022
NEGATIVE_REGULATION_OF_HYDROLASE_ACTIVITY	-1.44663	0.148	0.375772	-0.829738	-0.569525	0.569	0.597523	-0.244888
NEGATIVE_REGULATION_OF_NUCLEOBASENUCLEOSIDENUCLEOTIDE_AND_NUCLEIC_ACID_METABOLIC_PROCESS	-1.45021	0.147	0.375772	-0.832683	-0.742144	0.458	0.520426	-0.339135
AXONOGENESIS	-1.45381	0.146	0.375772	-0.835647	1.88079	0.06	0.272333	1.22185
NLS_BEARING_SUBSTRATE_IMPORT_INTO_NUCLEUS	-1.45381	0.146	0.375772	-0.835647	1.09847	0.272	0.429751	0.565431
SPHINGOID_METABOLIC_PROCESS	-1.45381	0.146	0.375772	-0.835647	-0.632592	0.527	0.565038	-0.278189
NEGATIVE_REGULATION_OF_TRANSPORT	-1.45381	0.146	0.375772	-0.835647	-1.46471	0.143	0.353232	-0.844664
ORGAN_DEVELOPMENT	-1.46106	0.144	0.375772	-0.841638	2.96774	0.003	0.0982953	2.52288
POSITIVE_REGULATION_OF_IMMUNE_RESPONSE	-1.46106	0.144	0.375772	-0.841638	1.11699	0.264	0.429573	0.578396
REGULATION_OF_INTRACELLULAR_TRANSPORT	-1.46471	0.143	0.375772	-0.844664	-1.30176	0.193	0.384588	-0.714443
POSITIVE_REGULATION_OF_TRANSCRIPTIONDNA_DEPENDENT	-1.46838	0.142	0.375772	-0.847712	-0.928786	0.353	0.466668	-0.452225
REGULATION_OF_MOLECULAR_FUNCTION	-1.46838	0.142	0.375772	-0.847712	-1.27871	0.201	0.390993	-0.696804
AMINO_ACID_DERIVATIVE_METABOLIC_PROCESS	-1.46838	0.142	0.375772	-0.847712	-1.38517	0.166	0.365558	-0.779892
VIRAL_GENOME_REPLICATION	-1.46838	0.142	0.375772	-0.847712	-1.75652	0.079	0.29881	-1.10237
POSITIVE_REGULATION_OF_TRANSFERASE_ACTIVITY	-1.47208	0.141	0.375772	-0.850781	-1.25632	0.209	0.396179	-0.679854
POSITIVE_REGULATION_OF_RNA_METABOLIC_PROCESS	-1.48328	0.138	0.375772	-0.860121	-0.905879	0.365	0.473341	-0.437707
GLYCEROPHOSPHOLIPID_METABOLIC_PROCESS	-1.48706	0.137	0.375772	-0.863279	-1.88819	0.059	0.270803	-1.22915
INTERACTION_WITH_HOST	-1.49085	0.136	0.375772	-0.866461	1.08708	0.277	0.430163	0.55752
NEGATIVE_REGULATION_OF_DNA_METABOLIC_PROCESS	-1.49467	0.135	0.375772	-0.869666	-0.942376	0.346	0.465703	-0.460924
COFACTOR_CATABOLIC_PROCESS	-1.49467	0.135	0.375772	-0.869666	-1.65463	0.098	0.319696	-1.00877
CELLULAR_MORPHOGENESIS_DURING_DIFFERENTIATION	-1.49851	0.134	0.375772	-0.872895	1.47208	0.141	0.352284	0.850781
DIGESTION	-1.50626	0.132	0.375772	-0.879426	-0.556308	0.578	0.604643	-0.238072
REGULATION_OF_METABOLIC_PROCESS	-1.51017	0.131	0.375772	-0.882729	-0.750423	0.453	0.517737	-0.343902
REGULATION_OF_ENDOCYTOSIS	-1.51806	0.129	0.375772	-0.88941	-1.76241	0.078	0.297785	-1.10791
NUCLEOBASENUCLEOSIDE_AND_NUCLEOTIDE_METABOLIC_PROCESS	-1.51806	0.129	0.375772	-0.88941	-1.8663	0.062	0.273805	-1.20761
CENTRAL_NERVOUS_SYSTEM_DEVELOPMENT	-1.52204	0.128	0.375772	-0.89279	1.46106	0.144	0.353232	0.841638
CARBOHYDRATE_METABOLIC_PROCESS	-1.52204	0.128	0.375772	-0.89279	-0.462113	0.644	0.663491	-0.191114
EPIDERMIS_DEVELOPMENT	-1.53007	0.126	0.375772	-0.899629	-0.510073	0.61	0.631648	-0.21467
CELLULAR_RESPONSE_TO_NUTRIENT_LEVELS	-1.5382	0.124	0.375772	-0.906578	-1.27305	0.203	0.392083	-0.692504
FEEDING_BEHAVIOR	-1.54643	0.122	0.375772	-0.91364	-0.57691	0.564	0.593799	-0.248721
AROMATIC_COMPOUND_METABOLIC_PROCESS	-1.55059	0.121	0.375772	-0.917215	-3.13359	0.00172681	0.0972174	-2.76275
MUSCLE_DEVELOPMENT	-1.58485	0.113	0.373769	-0.946922	2.03352	0.042	0.233429	1.37675
REGULATION_OF_CATALYTIC_ACTIVITY	-1.59819	0.11	0.366816	-0.958607	-1.62108	0.105	0.319696	-0.978811
MEIOSIS_I	-1.59819	0.11	0.366816	-0.958607	-2.2152	0.0267466	0.196864	-1.57273
BRAIN_DEVELOPMENT	-1.6027	0.109	0.366816	-0.962574	1.44663	0.148	0.353556	0.829738
GENE_SILENCING	-1.61644	0.106	0.360842	-0.974694	-0.924934	0.355	0.467798	-0.449772
RESPONSE_TO_CHEMICAL_STIMULUS	-1.61644	0.106	0.360842	-0.974694	-1.01943	0.308	0.44603	-0.511449
CELLULAR_RESPONSE_TO_STRESS	-1.62108	0.105	0.360842	-0.978811	-1.10768	0.268	0.429751	-0.571865
GENERATION_OF_PRECURSOR_METABOLITES_AND_ENERGY	-1.63048	0.103	0.356572	-0.987163	-1.66959	0.095	0.316796	-1.02228
REGULATION_OF_RNA_METABOLIC_PROCESS	-1.64485	0.1	0.350644	-1	-0.643345	0.52	0.561958	-0.283997
MEMBRANE_LIPID_BIOSYNTHETIC_PROCESS	-1.64972	0.099	0.348634	-1.00436	-1.60725	0.108	0.319696	-0.966576
CHROMATIN_MODIFICATION	-1.64972	0.099	0.348634	-1.00436	-1.80548	0.071	0.287163	-1.14874
G_PROTEIN_COUPLED_RECEPTOR_PROTEIN_SIGNALING_PATHWAY	-1.65957	0.097	0.346066	-1.01323	2.5427	0.011	0.160417	1.95861
CELL_RECOGNITION	-1.66456	0.096	0.345515	-1.01773	2.25611	0.0240637	0.192235	1.61864
STEROID_BIOSYNTHETIC_PROCESS	-1.66456	0.096	0.345515	-1.01773	-1.63048	0.103	0.319696	-0.987163
TRANSCRIPTION_INITIATION_FROM_RNA_POLYMERASE_II_PROMOTER	-1.66959	0.095	0.344956	-1.02228	-0.845199	0.398	0.491187	-0.400117
VIRAL_REPRODUCTION	-1.67466	0.094	0.342848	-1.02687	-0.672917	0.501	0.550157	-0.300162
NUCLEOSOME_ASSEMBLY	-1.67466	0.094	0.342848	-1.02687	-2.13691	0.0326055	0.209956	-1.48671
SECOND_MESSENGER_MEDIATED_SIGNALING	-1.67978	0.093	0.342848	-1.03152	-0.725737	0.468	0.525937	-0.329754
CELLULAR_RESPIRATION	-1.67978	0.093	0.342848	-1.03152	-2.75116	0.00593844	0.118021	-2.22633
NEGATIVE_REGULATION_OF_DNA_REPLICATION	-1.68494	0.092	0.342848	-1.03621	-0.750423	0.453	0.517737	-0.343902
INTERCELLULAR_JUNCTION_ASSEMBLY_AND_MAINTENANCE	-1.6954	0.09	0.342	-1.04576	1.30763	0.191	0.383408	0.718967
PROTEOGLYCAN_BIOSYNTHETIC_PROCESS	-1.7007	0.089	0.33978	-1.05061	0.919183	0.358	0.470791	0.446117
INDUCTION_OF_APOPTOSIS_BY_INTRACELLULAR_SIGNALS	-1.70604	0.088	0.33978	-1.05552	-1.23454	0.217	0.40293	-0.66354
REGULATION_OF_PROTEIN_KINASE_ACTIVITY	-1.71689	0.086	0.336182	-1.0655	-1.16752	0.243	0.41796	-0.614394
MEIOTIC_RECOMBINATION	-1.72238	0.085	0.33387	-1.07058	-2.81316	0.0049057	0.118021	-2.3093
INTERCELLULAR_JUNCTION_ASSEMBLY	-1.73354	0.083	0.331536	-1.08092	1.59819	0.11	0.319944	0.958607
VIRAL_REPRODUCTIVE_PROCESS	-1.73354	0.083	0.331536	-1.08092	-1.26186	0.207	0.3952	-0.68403
CARBOXYLIC_ACID_METABOLIC_PROCESS	-1.73354	0.083	0.331536	-1.08092	-2.53588	0.0112166	0.160417	-1.95014
G1_S_TRANSITION_OF_MITOTIC_CELL_CYCLE	-1.7392	0.082	0.331536	-1.08619	1.04505	0.296	0.437995	0.528708
G_PROTEIN_COUPLED_RECEPTOR_PROTEIN_SIGNALING_PATHWAY	-1.74491	0.081	0.330885	-1.09151	2.57583	0.01	0.151296	2
RNA_ELONGATION	-1.75069	0.08	0.328442	-1.09691	-0.986271	0.324	0.454666	-0.489455
ANDROGEN_RECEPTOR_SIGNALING_PATHWAY	-1.75652	0.079	0.325975	-1.10237	-0.938476	0.348	0.465717	-0.458421
POSITIVE_REGULATION_OF_PROTEIN_AMINO_ACID_PHOSPHORYLATION	-1.78046	0.075	0.315851	-1.12494	1.05374	0.292	0.437995	0.534617
CENTROSOME_CYCLE	-1.78046	0.075	0.315851	-1.12494	-2.02383	0.0429878	0.235779	-1.36665
SYSTEM_DEVELOPMENT	-1.78661	0.074	0.315851	-1.13077	3.29053	0.001	0.0834937	3
CYTOSKELETON_ORGANIZATION_AND_BIOGENESIS	-1.79283	0.073	0.3139	-1.13668	1.35946	0.174	0.368285	0.759451
POSITIVE_REGULATION_OF_PHOSPHATE_METABOLIC_PROCESS	-1.79912	0.072	0.312894	-1.14267	1.06915	0.285	0.433603	0.545155
CALCIUM_ION_TRANSPORT	-1.79912	0.072	0.312894	-1.14267	1.04722	0.295	0.437995	0.530178
NEGATIVE_REGULATION_OF_INTRACELLULAR_TRANSPORT	-1.79912	0.072	0.312894	-1.14267	-2.32859	0.0198809	0.181556	-1.70156
POSITIVE_REGULATION_OF_SIGNAL_TRANSDUCTION	-1.80548	0.071	0.312894	-1.14874	1.54643	0.122	0.327332	0.91364
REGULATION_OF_TRANSCRIPTION	-1.80548	0.071	0.312894	-1.14874	-0.709523	0.478	0.533505	-0.320572
REGULATION_OF_TRANSCRIPTIONDNA_DEPENDENT	-1.81191	0.07	0.312894	-1.1549	-0.649524	0.516	0.559857	-0.28735
LIPOPROTEIN_BIOSYNTHETIC_PROCESS	-1.81842	0.069	0.311453	-1.16115	-1.63048	0.103	0.319696	-0.987163
POSITIVE_REGULATION_OF_PHOSPHORYLATION	-1.82501	0.068	0.308644	-1.16749	1.31951	0.187	0.379104	0.728158
EMBRYONIC_MORPHOGENESIS	-1.82501	0.068	0.308644	-1.16749	1.04289	0.297	0.437995	0.527244
REGULATION_OF_PROTEIN_MODIFICATION_PROCESS	-1.83167	0.067	0.307522	-1.17393	0.966088	0.334	0.458618	0.476254
PROTEIN_UBIQUITINATION	-1.83842	0.066	0.304644	-1.18046	1.78046	0.075	0.296014	1.12494
POSITIVE_REGULATION_OF_TRANSCRIPTION	-1.85919	0.063	0.29412	-1.20066	-0.719229	0.472	0.529703	-0.326058
REGULATION_OF_TRANSPORT	-1.8735	0.061	0.28975	-1.21467	-0.797777	0.425	0.50565	-0.371611
I_KAPPAB_KINASE_NF_KAPPAB_CASCADE	-1.90331	0.057	0.275556	-1.24413	1.62576	0.104	0.319696	0.982967
CELLULAR_RESPONSE_TO_STIMULUS	-1.90331	0.057	0.275556	-1.24413	-1.99539	0.046	0.244039	-1.33724
ORGANIC_ACID_METABOLIC_PROCESS	-1.90331	0.057	0.275556	-1.24413	-2.59964	0.00933224	0.146624	-2.03001
REGULATION_OF_TRANSFERASE_ACTIVITY	-1.91888	0.055	0.272333	-1.25964	-1.24264	0.214	0.401039	-0.669586
TUBE_MORPHOGENESIS	-1.92684	0.054	0.270663	-1.26761	-0.740494	0.459	0.520837	-0.338187
PHOSPHOINOSITIDE_BIOSYNTHETIC_PROCESS	-1.92684	0.054	0.270663	-1.26761	-1.72793	0.084	0.305013	-1.07572
POSITIVE_REGULATION_OF_I_KAPPAB_KINASE_NF_KAPPAB_CASCADE	-1.95148	0.051	0.260419	-1.29243	1.93492	0.053	0.256219	1.27572
REGULATION_OF_KINASE_ACTIVITY	-1.95148	0.051	0.260419	-1.29243	-1.09847	0.272	0.429751	-0.565431
TRANSCRIPTION	-1.95148	0.051	0.260419	-1.29243	-1.09847	0.272	0.429751	-0.565431
REGULATION_OF_I_KAPPAB_KINASE_NF_KAPPAB_CASCADE	-1.95996	0.05	0.260419	-1.30103	2.00465	0.045	0.240294	1.34679
TRANSCRIPTION_DNA_DEPENDENT	-1.95996	0.05	0.260419	-1.30103	-1.05156	0.293	0.437995	-0.533132
CYTOPLASM_ORGANIZATION_AND_BIOGENESIS	-1.96859	0.049	0.260419	-1.3098	1.50238	0.133	0.34427	0.876148
PROTEIN_AMINO_ACID_LIPIDATION	-1.96859	0.049	0.260419	-1.3098	-1.50626	0.132	0.34427	-0.879426
CELLULAR_PROTEIN_CATABOLIC_PROCESS	-1.96859	0.049	0.260419	-1.3098	-1.97737	0.048	0.246189	-1.31876
SULFUR_COMPOUND_BIOSYNTHETIC_PROCESS	-1.97078	0.0487487	0.260419	-1.31204	-0.808157	0.419	0.504158	-0.377786
PROTEOGLYCAN_METABOLIC_PROCESS	-1.97737	0.048	0.260419	-1.31876	-0.687131	0.492	0.542462	-0.308035
CHROMATIN_ASSEMBLY	-1.97737	0.048	0.260419	-1.31876	-2.03373	0.0419788	0.233429	-1.37697
CENTROSOME_ORGANIZATION_AND_BIOGENESIS	-1.97737	0.048	0.260419	-1.31876	-2.36304	0.0181257	0.175574	-1.74171
TUBE_DEVELOPMENT	-1.9863	0.047	0.260419	-1.3279	-0.711136	0.477	0.533118	-0.321482
PROTEIN_TETRAMERIZATION	-1.99539	0.046	0.260419	-1.33724	-1.05156	0.293	0.437995	-0.533132
REGULATION_OF_NUCLEOCYTOPLASMIC_TRANSPORT	-1.99539	0.046	0.260419	-1.33724	-1.29593	0.195	0.386687	-0.709965
REPRODUCTIVE_PROCESS	-1.99991	0.04551	0.260419	-1.34189	-0.428895	0.668	0.685623	-0.175224
PROTEIN_AMINO_ACID_O_LINKED_GLYCOSYLATION	-2.01055	0.0443728	0.260419	-1.35288	-0.909663	0.363	0.472247	-0.440093
POSITIVE_REGULATION_OF_DNA_METABOLIC_PROCESS	-2.01141	0.0442823	0.260419	-1.35377	-1.12403	0.261	0.429573	-0.583359
ONE_CARBON_COMPOUND_METABOLIC_PROCESS	-2.01409	0.044	0.260419	-1.35655	-1.91888	0.055	0.25974	-1.25964
CHROMATIN_REMODELING	-2.01409	0.044	0.260419	-1.35655	-2.35476	0.0185347	0.175574	-1.73202
DNA_MODIFICATION	-2.02371	0.043	0.260419	-1.36653	-0.940424	0.347	0.465717	-0.459671
PROTEIN_HOMOOLIGOMERIZATION	-2.03352	0.042	0.260419	-1.37675	-1.93492	0.053	0.256219	-1.27572
PYRIMIDINE_NUCLEOTIDE_METABOLIC_PROCESS	-2.0449	0.0408651	0.260419	-1.38865	-0.984235	0.325	0.454666	-0.488117
PHOSPHOINOSITIDE_MEDIATED_SIGNALING	-2.04711	0.0406472	0.260419	-1.39097	0.96011	0.337	0.459648	0.47237
MACROMOLECULAR_COMPLEX_DISASSEMBLY	-2.05509	0.0398705	0.260419	-1.39935	-1.65957	0.097	0.319552	-1.01323
TRICARBOXYLIC_ACID_CYCLE_INTERMEDIATE_METABOLIC_PROCESS	-2.05829	0.0395622	0.260419	-1.40272	-2.22013	0.0264103	0.196864	-1.57823
REGULATION_OF_GENE_EXPRESSION_EPIGENETIC	-2.0644	0.0389803	0.260419	-1.40916	-0.86325	0.388	0.485446	-0.411168
CHROMOSOME_CONDENSATION	-2.07485	0.038	0.260419	-1.42022	-1.39838	0.162	0.36361	-0.790485
EXOCYTOSIS	-2.07618	0.0378773	0.260419	-1.42162	-1.5423	0.123	0.327332	-0.910095
POSITIVE_REGULATION_OF_TRANSPORT	-2.09873	0.0358408	0.250273	-1.44562	1.61644	0.106	0.319696	0.974694
RNA_BIOSYNTHETIC_PROCESS	-2.10498	0.0352929	0.248572	-1.45231	-1.08482	0.278	0.430163	-0.555955
CHROMATIN_ASSEMBLY_OR_DISASSEMBLY	-2.12821	0.0333195	0.238789	-1.4773	-2.08259	0.0372883	0.225663	-1.42843
PROTEIN_CATABOLIC_PROCESS	-2.14437	0.0320033	0.233453	-1.4948	-1.97548	0.0482133	0.246189	-1.31683
RNA_METABOLIC_PROCESS	-2.14897	0.0316367	0.232858	-1.49981	-2.98574	0.00282889	0.0982953	-2.54838
REGULATION_OF_LIPID_METABOLIC_PROCESS	-2.14942	0.031601	0.232858	-1.5003	1.61644	0.106	0.319696	0.974694
POSITIVE_REGULATION_OF_CELLULAR_METABOLIC_PROCESS	-2.15127	0.0314546	0.232858	-1.50232	-0.704695	0.481	0.534663	-0.317855
LIPID_BIOSYNTHETIC_PROCESS	-2.16593	0.0303166	0.230378	-1.51832	-2.8125	0.00491585	0.118021	-2.3084
EMBRYONIC_DEVELOPMENT	-2.17551	0.0295921	0.229677	-1.52882	1.16258	0.245	0.418712	0.610834
PROTEIN_DNA_COMPLEX_ASSEMBLY	-2.17762	0.0294342	0.229677	-1.53115	-1.21596	0.224	0.406684	-0.649752
TRANSCRIPTION_FROM_RNA_POLYMERASE_II_PROMOTER	-2.19193	0.0283844	0.225146	-1.54692	-0.325239	0.745	0.756106	-0.127844
RESPONSE_TO_LIGHT_STIMULUS	-2.21354	0.0268604	0.216265	-1.57089	1.23454	0.217	0.40293	0.66354
POSITIVE_REGULATION_OF_METABOLIC_PROCESS	-2.21982	0.0264309	0.21594	-1.57789	-0.790904	0.429	0.50565	-0.367543
UBIQUITIN_CYCLE	-2.2651	0.0235067	0.202158	-1.62881	1.19779	0.231	0.409386	0.636388
PROTEIN_OLIGOMERIZATION	-2.29583	0.0216858	0.192579	-1.66383	-1.68494	0.092	0.316588	-1.03621
REGULATION_OF_DNA_REPLICATION	-2.29606	0.0216724	0.192579	-1.66409	-0.789192	0.43	0.50565	-0.366532
NUCLEOBASENUCLEOSIDENUCLEOTIDE_AND_NUCLEIC_ACID_TRANSPORT	-2.29834	0.0215424	0.192579	-1.66671	-3.29707	0.000977009	0.0834937	-3.0101
ESTABLISHMENT_OF_ORGANELLE_LOCALIZATION	-2.29876	0.0215187	0.192579	-1.66718	-1.31652	0.188	0.380188	-0.725842
ORGANELLE_LOCALIZATION	-2.30342	0.021255	0.192579	-1.67254	-1.49851	0.134	0.34427	-0.872895
REGULATION_OF_TRANSCRIPTION_FROM_RNA_POLYMERASE_II_PROMOTER	-2.30937	0.0209232	0.192579	-1.67937	-0.301544	0.763	0.772455	-0.117475
MICROTUBULE_ORGANIZING_CENTER_ORGANIZATION_AND_BIOGENESIS	-2.31263	0.0207429	0.192579	-1.68313	-2.40982	0.0159602	0.175574	-1.79696
PROTEIN_MODIFICATION_BY_SMALL_PROTEIN_CONJUGATION	-2.34778	0.0188855	0.181523	-1.72387	1.88819	0.059	0.270803	1.22915
G_PROTEIN_SIGNALING_COUPLED_TO_IP3_SECOND_MESSENGERPHOSPHOLIPASE_C_ACTIVATING	-2.36055	0.0182481	0.177484	-1.73878	1.00895	0.313	0.44693	0.504456
MICROTUBULE_BASED_PROCESS	-2.37369	0.0176114	0.177181	-1.75421	-1.92684	0.054	0.259518	-1.26761
POSITIVE_REGULATION_OF_NUCLEOBASENUCLEOSIDENUCLEOTIDE_AND_NUCLEIC_ACID_METABOLIC_PROCESS	-2.38866	0.0169097	0.172945	-1.77186	-0.804688	0.421	0.50565	-0.375718
PROTEIN_COMPLEX_DISASSEMBLY	-2.38891	0.0168983	0.172945	-1.77216	-1.75652	0.079	0.29881	-1.10237
DNA_DAMAGE_RESPONSESIGNAL_TRANSDUCTION_RESULTING_IN_INDUCTION_OF_APOPTOSIS	-2.40538	0.0161558	0.171419	-1.79167	-1.91888	0.055	0.25974	-1.25964
CELLULAR_PROTEIN_COMPLEX_DISASSEMBLY	-2.41229	0.0158525	0.171419	-1.7999	-1.97737	0.048	0.246189	-1.31876
REGULATION_OF_NUCLEOBASENUCLEOSIDENUCLEOTIDE_AND_NUCLEIC_ACID_METABOLIC_PROCESS	-2.42229	0.0154231	0.17028	-1.81183	-0.762101	0.446	0.514664	-0.350665
MORPHOGENESIS_OF_AN_EPITHELIUM	-2.4382	0.0147605	0.16749	-1.8309	0.902107	0.367	0.474429	0.435334
RESPONSE_TO_UV	-2.50097	0.0123852	0.144553	-1.9071	0.909663	0.363	0.472247	0.440093
POSITIVE_REGULATION_OF_BIOLOGICAL_PROCESS	-2.52049	0.0117193	0.138763	-1.9311	-0.191671	0.848	0.850081	-0.0716041
GLYCEROPHOSPHOLIPID_BIOSYNTHETIC_PROCESS	-2.52276	0.0116437	0.138763	-1.93391	-2.28226	0.0224738	0.187358	-1.64832
RESPONSE_TO_ABIOTIC_STIMULUS	-2.52406	0.0116008	0.138763	-1.93551	-0.790904	0.429	0.50565	-0.367543
LIPOPROTEIN_METABOLIC_PROCESS	-2.5727	0.0100909	0.126835	-1.99607	-1.45742	0.145	0.353232	-0.838632
POSITIVE_REGULATION_OF_PROTEIN_MODIFICATION_PROCESS	-2.58992	0.00959972	0.122546	-2.01774	1.08482	0.278	0.430163	0.555955
ESTABLISHMENT_AND_OR_MAINTENANCE_OF_CHROMATIN_ARCHITECTURE	-2.61297	0.00897592	0.117993	-2.04692	-2.15015	0.0315435	0.209521	-1.50109
PROTEIN_COMPLEX_ASSEMBLY	-2.61483	0.00892715	0.117993	-2.04929	-2.13387	0.032853	0.209956	-1.48342
GLUTAMINE_FAMILY_AMINO_ACID_METABOLIC_PROCESS	-2.65343	0.00796779	0.108933	-2.09866	-1.3722	0.17	0.366685	-0.769551
CELL_PROLIFERATION_GO_0008283	-2.67983	0.00736601	0.103759	-2.13277	-1.61183	0.107	0.319696	-0.970616
RESPONSE_TO_RADIATION	-2.68174	0.00732396	0.103759	-2.13525	-0.688719	0.491	0.542462	-0.308919
PHOSPHOLIPID_BIOSYNTHETIC_PROCESS	-2.6835	0.00728561	0.103759	-2.13753	-2.46011	0.0138896	0.168206	-1.85731
CELL_DIVISION	-2.70926	0.0067434	0.10017	-2.17112	1.59819	0.11	0.319944	0.958607
DNA_DAMAGE_RESPONSESIGNAL_TRANSDUCTION_BY_P53_CLASS_MEDIATOR	-2.72128	0.0065029	0.0983864	-2.18689	-1.40172	0.161	0.363362	-0.793174
POSITIVE_REGULATION_OF_CELLULAR_PROCESS	-2.74346	0.00607946	0.0937154	-2.21614	-0.253347	0.8	0.805919	-0.09691
DNA_DAMAGE_CHECKPOINT	-2.81773	0.00483646	0.0774782	-2.31547	-2.01671	0.0437262	0.238066	-1.35926
MEIOTIC_CELL_CYCLE	-2.82658	0.00470477	0.0768759	-2.32746	-1.80548	0.071	0.287163	-1.14874
G1_PHASE	-2.83141	0.00463428	0.0768759	-2.33402	0.876055	0.381	0.481627	0.419075
G1_PHASE_OF_MITOTIC_CELL_CYCLE	-2.84469	0.00444553	0.0756666	-2.35208	0.857805	0.391	0.486221	0.407823
DNA_PACKAGING	-2.88121	0.00396152	0.068863	-2.40214	-2.15113	0.0314659	0.209521	-1.50216
REGULATION_OF_DNA_METABOLIC_PROCESS	-2.88341	0.00393391	0.068863	-2.40518	-1.15278	0.249	0.421134	-0.603801
REGULATION_OF_CYCLIN_DEPENDENT_PROTEIN_KINASE_ACTIVITY	-2.93476	0.00333805	0.0606042	-2.47651	-0.712751	0.476	0.532729	-0.322393
MITOTIC_SPINDLE_ORGANIZATION_AND_BIOGENESIS	-2.9492	0.00318595	0.0591574	-2.49676	-2.22154	0.0263145	0.196864	-1.57981
POSITIVE_REGULATION_OF_CELL_CYCLE	-2.96461	0.00303072	0.0575836	-2.51845	-1.20036	0.23	0.409386	-0.638272
BASE_EXCISION_REPAIR	-3.04552	0.00232275	0.0462851	-2.634	-2.76253	0.00573557	0.118021	-2.24142
INTERPHASE_OF_MITOTIC_CELL_CYCLE	-3.04944	0.00229266	0.0462851	-2.63966	1.50626	0.132	0.34427	0.879426
MICROTUBULE_CYTOSKELETON_ORGANIZATION_AND_BIOGENESIS	-3.06533	0.00217428	0.0455483	-2.66269	-1.61644	0.106	0.319696	-0.974694
ORGANELLE_ORGANIZATION_AND_BIOGENESIS	-3.12776	0.00176144	0.0388944	-2.75413	-2.49883	0.0124606	0.161592	-1.90446
DNA_DAMAGE_RESPONSESIGNAL_TRANSDUCTION	-3.12884	0.00175496	0.0388944	-2.75573	-2.31089	0.020839	0.184484	-1.68112
G2_M_TRANSITION_OF_MITOTIC_CELL_CYCLE	-3.1402	0.00168833	0.0388944	-2.77254	-0.634124	0.526	0.564707	-0.279014
CYTOKINESIS	-3.16383	0.00155706	0.0374153	-2.80769	1.62108	0.105	0.319696	0.978811
DOUBLE_STRAND_BREAK_REPAIR	-3.1766	0.00149011	0.0368914	-2.82678	-0.802956	0.422	0.50565	-0.374688
SISTER_CHROMATID_SEGREGATION	-3.21131	0.00132129	0.0337342	-2.879	-0.676064	0.499	0.548699	-0.301899
CHROMOSOME_SEGREGATION	-3.26116	0.00110959	0.029243	-2.95484	-0.500107	0.617	0.638087	-0.209715
MITOTIC_SISTER_CHROMATID_SEGREGATION	-3.31933	0.000902327	0.0263286	-3.04464	-0.794336	0.427	0.50565	-0.369572
REGULATION_OF_MITOTIC_CELL_CYCLE	-3.32058	0.000898304	0.0263286	-3.04658	-1.34694	0.178	0.372887	-0.74958
SPINDLE_ORGANIZATION_AND_BIOGENESIS	-3.33708	0.000846636	0.0263286	-3.0723	-2.37995	0.0173148	0.175574	-1.76158
INTERPHASE	-3.33881	0.000841389	0.0263286	-3.075	1.37542	0.169	0.366685	0.772113
DNA_REPLICATION_INITIATION	-3.34837	0.000812884	0.0263286	-3.08997	-2.46674	0.013635	0.168206	-1.86534
DNA_INTEGRITY_CHECKPOINT	-3.36501	0.000765411	0.0263286	-3.11611	-2.04353	0.041	0.233344	-1.38722
DNA_REPLICATION	-3.37688	0.000733129	0.0263286	-3.13482	-2.96694	0.00300781	0.0982953	-2.52175
MITOTIC_CELL_CYCLE_CHECKPOINT	-3.51593	0.000438219	0.0170488	-3.35831	-1.33157	0.183	0.37866	-0.737549
CHROMOSOME_ORGANIZATION_AND_BIOGENESIS	-3.52897	0.000417179	0.0170418	-3.37968	-2.51673	0.011845	0.160417	-1.92647
BIOPOLYMER_METABOLIC_PROCESS	-3.53435	0.000408782	0.0170418	-3.38851	-2.75874	0.00580251	0.118021	-2.23638
CELL_CYCLE_CHECKPOINT_GO_0000075	-3.54423	0.000393761	0.0170418	-3.40477	-2.26809	0.0233236	0.191511	-1.6322
DNA_RECOMBINATION	-3.55761	0.000374245	0.0170418	-3.42684	-2.55345	0.0106661	0.15844	-1.972
DNA_DEPENDENT_DNA_REPLICATION	-3.5696	0.000357531	0.0170418	-3.44669	-2.76672	0.00566227	0.118021	-2.24701
REGULATION_OF_MITOSIS	-3.64673	0.000265594	0.014466	-3.57578	-1.95996	0.05	0.25216	-1.30103
REGULATION_OF_CELL_CYCLE	-3.67041	0.000242162	0.0141319	-3.61589	-1.28441	0.199	0.388955	-0.701147
RESPONSE_TO_ENDOGENOUS_STIMULUS	-3.77698	0.000158741	0.00997624	-3.79931	-2.7364	0.00621162	0.118021	-2.2068
DNA_REPAIR	-3.79509	0.000147588	0.00997624	-3.83095	-2.38979	0.0168582	0.175574	-1.77319
M_PHASE	-3.89536	9.80511e-05	0.00728252	-4.00855	-2.50663	0.0121889	0.160618	-1.91404
NUCLEOBASENUCLEOSIDENUCLEOTIDE_AND_NUCLEIC_ACID_METABOLIC_PROCESS	-3.96461	7.35146e-05	0.00600614	-4.13363	-3.77386	0.000160743	0.0834937	-3.79387
MITOTIC_CELL_CYCLE	-3.96666	7.28872e-05	0.00600614	-4.13735	-1.81191	0.07	0.287163	-1.1549
RESPONSE_TO_DNA_DAMAGE_STIMULUS	-3.96898	7.21824e-05	0.00600614	-4.14157	-2.76871	0.00562793	0.118021	-2.24965
RESPONSE_TO_STRESS	-4.01082	6.05075e-05	0.00600614	-4.21819	-2.13996	0.0323583	0.209956	-1.49001
M_PHASE_OF_MITOTIC_CELL_CYCLE	-4.01701	5.8941e-05	0.00600614	-4.22958	-2.35469	0.0185383	0.175574	-1.73193
CELL_CYCLE_GO_0007049	-4.11444	3.8812e-05	0.00600614	-4.41103	-2.39935	0.0164242	0.175574	-1.78452
DNA_METABOLIC_PROCESS	-4.14655	3.37529e-05	0.00600614	-4.47169	-3.28441	0.00102195	0.0834937	-2.99057
MITOSIS	-4.16465	3.11831e-05	0.00600614	-4.50608	-2.23132	0.02566	0.196864	-1.59074
CELL_CYCLE_PHASE	-4.32548	1.52201e-05	0.00600614	-4.81758	-1.45381	0.146	0.353232	-0.835647
CELL_CYCLE_PROCESS	-4.35606	1.32422e-05	0.00600614	-4.87804	-2.20264	0.0276204	0.198356	-1.55877

## Sheet: TAZ KD DGE signature
	shWWTR1 vs control
Gene Symbol	t	p.value	FDR	FC
1/2-SBSRNA4	-2.22621	0.084569	0.385597	0.392857
61E3.4	5.46761	0.00425478	0.139193	1.2809
A1BG	0.867734	0.430797	0.719974	1.03333
A1BG-AS1	-1.55775	0.188602	0.517844	0.628492
A2LD1	-0.548785	0.610115	0.827242	0.757732
A2M	-1.07832	0.337019	0.650051	0.757143
A4GALT	-1.26359	0.269859	0.593634	0.333333
AAAS	-0.603553	0.576211	0.807221	0.788778
AACS	-1.14714	0.310477	0.628097	0.778037
AACSP1	1.65444	0.167619	0.494261	0.967105
AADAT	2.21171	0.086011	0.387788	0.928182
AAGAB	2.29079	0.0784593	0.374782	0.936496
AAK1	1.44507	0.216416	0.546017	0.927644
AAMP	0.575584	0.593373	0.817412	0.870482
AARS	-0.264263	0.803631	0.922382	0.820532
AARS2	-1.67319	0.163834	0.489352	0.742645
AARSD1	0.0670432	0.949517	0.981914	0.838589
AASDH	0.677191	0.532601	0.780469	0.88935
AASDHPPT	1.42966	0.22052	0.550853	0.910974
AASS	-1.45631	0.213467	0.543237	0.773747
AATF	2.65118	0.0522116	0.325348	0.974294
AATK	-0.0810163	0.939022	0.97651	0.855828
ABAT	-2.34054	0.0740845	0.368957	0.689266
ABCA1	4.0148	0.0134814	0.209998	1.31746
ABCA11P	-1.73328	0.152285	0.475092	0.615291
ABCA12	-6.79286	0.00180074	0.117054	0.582927
ABCA17P	2.77281	0.045714	0.311617	2.02941
ABCA2	-1.6836	0.161771	0.486823	0.658796
ABCA3	-1.35701	0.240932	0.569324	0.767622
ABCA4	-0.594626	0.581654	0.810578	0.75
ABCA5	-0.204833	0.846935	0.941534	0.75
ABCA7	-0.385704	0.717845	0.883629	0.809524
ABCB1	-1.0632	0.343115	0.653788	0.743363
ABCB10	2.36778	0.0718043	0.365024	0.971841
ABCB4	-1.46094	0.212263	0.542453	0.375
ABCB6	0.377349	0.723611	0.886986	0.860173
ABCB7	-0.3317	0.75549	0.903077	0.817052
ABCB8	-0.656532	0.544602	0.787021	0.802506
ABCB9	2.12519	0.0951987	0.401359	1.21731
ABCC1	-0.804211	0.462937	0.739907	0.798608
ABCC10	-1.17888	0.298881	0.61803	0.773529
ABCC11	0.530903	0.621446	0.834598	1.125
ABCC2	1.66829	0.164814	0.49058	0.959016
ABCC3	-3.62274	0.0193107	0.236292	0.675251
ABCC4	2.14698	0.0927873	0.397353	0.955241
ABCC5	4.51536	0.00879629	0.17917	1.08435
ABCC6	-4.46967	0.00913318	0.181127	0.222222
ABCC6P1	33.2244	2.11497e-06	0.00537243	11.6385
ABCC6P2	0.711698	0.51297	0.768816	1.03846
ABCC8	2.6125	0.0544922	0.328758	1.13386
ABCC9	0.0680853	0.948734	0.981512	0.833333
ABCD1	-1.52669	0.19589	0.52678	0.657385
ABCD2	-2.47263	0.0637286	0.349747	0.732252
ABCD3	-0.0196929	0.985159	0.993951	0.834783
ABCD4	1.43709	0.218531	0.548854	0.902214
ABCE1	-0.677374	0.532496	0.780383	0.80119
ABCF1	-1.22938	0.28125	0.602438	0.757943
ABCF2	-0.277415	0.794153	0.919083	0.817151
ABCF3	1.45302	0.214325	0.544462	0.906212
ABCG1	-0.424437	0.691407	0.870378	0.778481
ABCG4	0.994069	0.37222	0.67665	1.03125
ABHD1	3.10784	0.0320965	0.280891	1.25
ABHD10	-1.39483	0.230087	0.558672	0.729017
ABHD11	-0.639825	0.554441	0.793111	0.801724
ABHD12	-0.503687	0.63893	0.845344	0.797155
ABHD13	2.32361	0.0755421	0.370225	0.941455
ABHD14A	1.21253	0.287021	0.608383	0.946154
ABHD14B	-0.673409	0.534784	0.781669	0.779167
ABHD15	-0.29167	0.783926	0.914803	0.757282
ABHD16A	0.873106	0.428162	0.718512	0.914155
ABHD2	-2.53786	0.0592184	0.340419	0.727241
ABHD3	1.59136	0.181021	0.508775	0.938623
ABHD4	2.15319	0.0921124	0.396642	1.04803
ABHD5	-6.39338	0.00229686	0.123501	0.552308
ABHD6	2.97837	0.0367172	0.292441	1.25874
ABHD8	0.719582	0.508558	0.765346	0.931319
ABI1	0.188579	0.858898	0.946646	0.842374
ABI2	1.70426	0.157754	0.481978	0.919241
ABI3	2.05048	0.103994	0.41315	2
ABI3BP	-0.355104	0.739068	0.894551	0.79558
ABL1	-1.06325	0.343094	0.653788	0.762619
ABL2	2.0775	0.100715	0.408839	0.94311
ABLIM1	0.503532	0.639031	0.845344	0.858671
ABLIM2	-0.962816	0.386056	0.687138	0.697183
ABLIM3	-2.29382	0.0781851	0.374513	0.39823
ABR	0.632169	0.55899	0.796251	0.873519
ABT1	2.5964	0.0554747	0.331065	0.982041
ABTB1	-1.47793	0.207906	0.539115	0.728395
ABTB2	-0.358953	0.736383	0.89263	0.791768
ACAA1	-0.482225	0.652917	0.852181	0.765808
ACAA2	1.79104	0.141982	0.46296	0.932486
ACACA	0.466089	0.663544	0.857966	0.853872
ACACB	-1.03137	0.356262	0.664353	0.728188
ACAD10	-0.808565	0.460676	0.738438	0.797297
ACAD11	1.25572	0.272441	0.596062	0.991935
ACAD8	0.25273	0.811977	0.92623	0.867119
ACAD9	-0.661872	0.541482	0.785759	0.804995
ACADL	2.23681	0.0835314	0.384614	3
ACADM	-2.87255	0.0410669	0.302784	0.654947
ACADS	-0.786259	0.472347	0.745413	0.765517
ACADSB	-1.13513	0.314969	0.631648	0.76178
ACADVL	-0.767154	0.48252	0.751186	0.772395
ACAN	2.00127	0.110265	0.424026	2.4
ACAP1	0.428852	0.688425	0.869438	0.75
ACAP2	-1.58516	0.182395	0.510393	0.717405
ACAP3	-0.27106	0.798728	0.920615	0.813625
ACAT1	-0.654699	0.545676	0.787706	0.805619
ACAT2	-1.75303	0.148678	0.470858	0.741101
ACBD3	-0.278043	0.793701	0.919053	0.816856
ACBD4	-6.42529	0.00225159	0.123501	0.527778
ACBD5	1.67131	0.16421	0.490002	0.941451
ACBD6	0.734412	0.500334	0.760893	0.87709
ACBD7	-1.95816	0.116094	0.432024	0.654843
ACCN1	-4.95724	0.00619848	0.160206	0.486486
ACCN2	0.37026	0.728521	0.888779	0.861027
ACCN3	-2.36093	0.0723709	0.365683	0.648529
ACCN4	0.69595	0.521864	0.774854	1.04651
ACCS	-6.11217	0.0027473	0.123501	0.0174764
ACCSL	-0.267734	0.801126	0.921422	0.409091
ACD	-2.29551	0.0780322	0.374513	0.639368
ACE	-3.89371	0.0150272	0.218493	0.566929
ACE2	1.66503	0.16547	0.491172	2.16667
ACER2	-2.13936	0.0936226	0.398364	0.538462
ACER3	0.735464	0.499754	0.760638	0.892117
ACHE	0.657554	0.544004	0.786635	1.08333
ACIN1	1.04509	0.350542	0.660057	0.877908
ACLY	-1.1687	0.302557	0.621762	0.778611
ACN9	-0.412951	0.699195	0.874391	0.803161
ACO1	2.33521	0.0745402	0.369513	1.04075
ACO2	-0.733408	0.500887	0.761114	0.798626
ACOT1	-1.85717	0.131074	0.448976	0.636364
ACOT11	-3.39565	0.0240356	0.260057	0.5625
ACOT13	1.70143	0.158299	0.482837	0.930301
ACOT2	-0.512527	0.63322	0.841542	0.798817
ACOT4	0.235958	0.824164	0.931911	0.852941
ACOT7	-1.07472	0.338461	0.650901	0.764482
ACOT8	-2.42077	0.067589	0.3558	0.684435
ACOT9	-1.48264	0.206716	0.538466	0.763467
ACOX1	1.67421	0.16363	0.489007	0.930917
ACOX2	0.857428	0.435889	0.724177	0.9
ACOX3	0.471662	0.659863	0.855866	0.860539
ACP1	-2.76432	0.0461361	0.313035	0.729559
ACP2	-1.35863	0.240457	0.568848	0.684657
ACP5	-0.439307	0.68139	0.866423	0.692308
ACP6	-2.1649	0.0908547	0.394749	0.675325
ACPL2	2.53303	0.0595396	0.341188	0.953971
ACPP	-1.33151	0.248518	0.576321	0.584906
ACRBP	-1.30242	0.257454	0.581825	0.619565
ACRC	-0.157323	0.882027	0.956869	0.81383
ACSF2	1.81222	0.138387	0.459481	0.994898
ACSF3	0.80829	0.460818	0.738438	0.912668
ACSL1	1.58658	0.182079	0.510111	0.908485
ACSL3	1.55011	0.190369	0.519925	0.920597
ACSL4	-5.10951	0.00552374	0.151985	0.478399
ACSL5	-1.72883	0.153111	0.475973	0.428571
ACSL6	-2.06157	0.102635	0.412004	0.616935
ACSM3	-2.83235	0.0428717	0.30666	0.26087
ACSS1	4.58693	0.00829786	0.175881	1.34722
ACSS2	-2.05053	0.103988	0.41315	0.735
ACTA1	0.76199	0.485298	0.752278	1
ACTA2	-3.67484	0.0183857	0.232938	0.619553
ACTB	-0.172226	0.87098	0.951852	0.823105
ACTG1	-1.24018	0.277604	0.600316	0.756411
ACTG2	-2.86269	0.0415014	0.30357	0.682216
ACTL6A	0.418131	0.695677	0.872708	0.855255
ACTL6B	1.85131	0.132004	0.45019	1.04637
ACTL8	3.1422	0.0309853	0.278919	1.7
ACTN1	-0.374245	0.725759	0.888022	0.818267
ACTN2	-2.25759	0.0815372	0.38021	0.726884
ACTN3	-0.331703	0.755487	0.903077	1.125
ACTN4	-2.26052	0.0812598	0.379555	0.726761
ACTR10	0.682681	0.529443	0.779029	0.881231
ACTR1A	-1.45905	0.212753	0.542524	0.758221
ACTR1B	0.586489	0.586643	0.813832	0.863722
ACTR2	1.41475	0.224569	0.553862	0.912271
ACTR3	0.127337	0.904346	0.964593	0.84021
ACTR3B	0.0392168	0.970452	0.989802	0.835816
ACTR3C	-0.950208	0.391758	0.691996	0.636364
ACTR5	0.304326	0.77489	0.911838	0.856822
ACTR6	-0.786299	0.472326	0.745413	0.783694
ACTR8	0.966777	0.384279	0.68606	0.90797
ACVR1	-3.27568	0.0270711	0.269344	0.710907
ACVR1B	3.41886	0.0234951	0.256885	0.988734
ACVR2A	3.19704	0.0293026	0.275427	0.987417
ACVR2B	0.919139	0.40611	0.702669	0.914717
ACVRL1	-2.91582	0.0392204	0.299072	0.648603
ACY1	0.210897	0.842484	0.93958	0.970588
ACYP1	0.581362	0.589801	0.815286	0.891969
ACYP2	-0.291984	0.783702	0.914803	0.773077
ADA	-0.10288	0.922629	0.971752	0.830966
ADAL	-4.62729	0.00803164	0.175881	0.598565
ADAM1	2.29883	0.0777336	0.374342	0.989865
ADAM10	2.08999	0.0992378	0.406115	0.993263
ADAM11	1.04045	0.352469	0.661811	1.00307
ADAM12	-6.30766	0.002424	0.123501	0.535129
ADAM15	-0.675998	0.533289	0.781201	0.766922
ADAM17	-0.0702484	0.947109	0.980328	0.831357
ADAM19	-8.03357	0.000908618	0.0862875	0.507801
ADAM21	0.313472	0.768386	0.908648	0.980769
ADAM21P1	2.73982	0.0473808	0.315622	9
ADAM22	-4.1995	0.0114705	0.196529	0.592853
ADAM23	-3.55369	0.020622	0.243688	0.592453
ADAM28	-0.610006	0.572298	0.804774	0.875
ADAM32	-0.440509	0.680584	0.865912	0.774194
ADAM33	1.64976	0.168577	0.49524	1.17857
ADAM8	-0.103764	0.921967	0.971476	0.782609
ADAM9	-2.64275	0.052699	0.326155	0.723309
ADAMDEC1	23.7473	9.05156e-06	0.00537243	1.54776
ADAMTS1	-0.167763	0.874284	0.952912	0.822683
ADAMTS10	-0.399436	0.708415	0.87874	0.783088
ADAMTS12	0.168246	0.873927	0.952912	0.9375
ADAMTS13	0.773764	0.478982	0.748659	0.933673
ADAMTS14	-0.788487	0.471172	0.744936	0.783142
ADAMTS15	-3.7545	0.01707	0.229776	0.514706
ADAMTS16	1.25455	0.272824	0.596306	2.25
ADAMTS17	-0.0439531	0.966886	0.987748	0.831371
ADAMTS19	0.562004	0.601821	0.822523	0.860885
ADAMTS2	-5.60771	0.00385577	0.133777	0.629836
ADAMTS20	-0.32778	0.758255	0.904236	0.75
ADAMTS3	2.17789	0.0894819	0.392281	0.957421
ADAMTS4	-0.0936865	0.929517	0.973365	0.839792
ADAMTS5	-0.58524	0.587412	0.813996	0.771739
ADAMTS6	-1.47044	0.209816	0.540612	0.692308
ADAMTS7	-0.823666	0.452902	0.73331	0.771586
ADAMTS9	0.84994	0.439618	0.726316	0.881706
ADAMTS9-AS2	1.00058	0.36939	0.674752	0.92602
ADAMTSL1	2.39426	0.0696621	0.359238	1.15
ADAMTSL2	-1.1427	0.312133	0.629283	0.69697
ADAMTSL3	-0.47538	0.657413	0.85456	1
ADAMTSL4	-1.41194	0.225337	0.554082	0.706731
ADAMTSL5	-3.15678	0.0305274	0.277651	0.136364
ADAP1	0.20453	0.847157	0.941534	0.850806
ADAR	-3.04288	0.0343255	0.285656	0.695896
ADARB1	-2.53246	0.0595778	0.341188	0.672297
ADAT1	0.501238	0.640517	0.845829	0.87594
ADAT2	3.17803	0.0298738	0.276402	1.02209
ADAT3	1.0669	0.341614	0.652749	1.02049
ADC	1.10017	0.328381	0.641139	1.21875
ADCK1	-1.69562	0.159422	0.484162	0.597345
ADCK2	-0.685912	0.527591	0.778658	0.738661
ADCK3	-0.634917	0.557354	0.795096	0.790682
ADCK4	-0.638977	0.554944	0.79349	0.776712
ADCK5	-1.85231	0.131845	0.450077	0.586957
ADCY1	1.49085	0.204653	0.536287	0.925214
ADCY2	-0.463049	0.665557	0.859263	0.757576
ADCY3	-0.167199	0.874702	0.952912	0.824948
ADCY4	1.80986	0.138784	0.459634	1.5
ADCY5	-0.894896	0.417606	0.71094	0.694581
ADCY6	-5.36705	0.00457207	0.143246	0.560808
ADCY7	-0.847679	0.440749	0.727137	0.795319
ADCY8	0.563573	0.60084	0.822112	0.857143
ADCY9	1.03469	0.354873	0.663027	0.892595
ADCYAP1	-1.81006	0.13875	0.459634	0.566038
ADCYAP1R1	0.607183	0.574008	0.805628	0.906152
ADD1	0.636793	0.55624	0.794266	0.8654
ADD2	-0.574021	0.594341	0.817933	0.80738
ADD3	-1.46556	0.21107	0.541957	0.750522
ADH5	-0.642686	0.552748	0.791702	0.804252
ADHFE1	2.18214	0.0890366	0.39187	1.61538
ADI1	0.155049	0.883715	0.957084	0.840459
ADIPOR1	0.980055	0.378372	0.681717	0.887842
ADIPOR2	-2.03297	0.10618	0.416968	0.739561
ADK	-1.91488	0.122278	0.439998	0.748101
ADM	-1.18568	0.296451	0.61584	0.741147
ADM2	-0.332947	0.75461	0.902675	0.7875
ADNP	-0.819472	0.45505	0.734649	0.791476
ADNP2	0.582645	0.58901	0.814643	0.909064
ADO	1.69348	0.159837	0.48465	0.918745
ADORA1	1.04723	0.34966	0.659641	0.909091
ADORA2A	-1.45883	0.212812	0.542524	0.712185
ADORA2B	-0.134573	0.89895	0.962811	0.834975
ADORA3	-0.616408	0.568433	0.802139	0.6
ADPGK	-4.06333	0.0129151	0.20811	0.677763
ADPRH	1.1617	0.305106	0.623915	0.95086
ADPRHL1	0.943492	0.394825	0.694228	1.10526
ADPRHL2	-0.321326	0.762817	0.90642	0.798165
ADRA1A	-0.278783	0.79317	0.918881	0.672414
ADRA1B	-3.94157	0.0143925	0.215589	0.0569016
ADRA2A	-4.29208	0.0105972	0.19274	0.551461
ADRA2B	-1.42729	0.221161	0.550987	0.658163
ADRA2C	0.788334	0.471252	0.744936	0.957198
ADRB2	0.0479298	0.963893	0.986449	0.583333
ADRBK1	-0.463519	0.665246	0.85903	0.800026
ADRBK2	2.33723	0.0743674	0.369513	0.960455
ADRM1	-1.19444	0.293342	0.613601	0.762068
ADSL	0.716969	0.510017	0.766848	0.865763
ADSS	4.71693	0.00747599	0.171793	1.11169
ADSSL1	0.0926774	0.930274	0.973744	0.82
AEBP1	0.0138889	0.989533	0.996186	0.834407
AEBP2	3.45858	0.0226027	0.252952	1.04246
AEN	1.47969	0.207461	0.538912	0.931829
AES	-0.690497	0.52497	0.776751	0.783146
AFAP1	0.565592	0.599581	0.821335	0.860915
AFAP1-AS1	-1.47475	0.208715	0.539864	0.514286
AFAP1L1	1.82491	0.136281	0.456163	1.38
AFAP1L2	-1.93006	0.12007	0.436371	0.42233
AFF1	-2.46449	0.0643178	0.351034	0.712566
AFF2	0.113982	0.914322	0.968623	0.844371
AFF3	-0.839557	0.44483	0.728929	0.711207
AFF4	-10.0945	0.000351286	0.0666631	0.456175
AFG3L1P	1.32391	0.250825	0.577909	0.962382
AFG3L2	-0.89768	0.416273	0.709833	0.785942
AFMID	-0.46014	0.667486	0.860392	0.796422
AFTPH	-0.351123	0.74185	0.895729	0.813936
AGA	0.743121	0.495549	0.757741	0.878634
AGAP1	-0.54344	0.613489	0.830207	0.793675
AGAP2	3.04939	0.0340943	0.285342	1.15094
AGAP3	-0.00133254	0.998996	0.999649	0.838504
AGAP4	-2.27227	0.08016	0.3776	0.575472
AGAP5	-0.333591	0.754157	0.902392	0.800847
AGAP6	-0.63079	0.559812	0.796535	0.792793
AGAP7	-1.60065	0.17898	0.505689	0.375
AGAP8	-2.74024	0.0473589	0.315622	0.385714
AGAP9	0.12802	0.903836	0.964359	0.833333
AGBL2	-2.51025	0.0610824	0.34483	0.4
AGBL3	0.0351398	0.973523	0.990933	0.8
AGBL4	3.29446	0.0265676	0.268691	1.42105
AGBL5	-0.785828	0.472575	0.745603	0.791351
AGER	1.68292	0.161903	0.486823	1.02941
AGFG1	-1.24495	0.276011	0.59933	0.782098
AGFG2	-1.28897	0.26169	0.586136	0.697039
AGGF1	1.44892	0.215401	0.545479	0.91198
AGK	-0.774317	0.478687	0.748452	0.802892
AGL	-0.983471	0.376864	0.680385	0.778773
AGMAT	1.75696	0.14797	0.470506	1.13043
AGMO	-0.619376	0.566646	0.801182	0.75
AGPAT1	-1.49031	0.204787	0.53631	0.740947
AGPAT2	-2.41412	0.068102	0.356654	0.671642
AGPAT3	3.97382	0.0139825	0.212993	1.06191
AGPAT4	0.00112632	0.999151	0.999649	0.834003
AGPAT4-IT1	0.0840929	0.936712	0.975753	0.882353
AGPAT5	4.11467	0.0123465	0.202553	1.05883
AGPAT6	-0.672018	0.535589	0.781814	0.805307
AGPAT9	-1.27343	0.266663	0.590233	0.308824
AGPHD1	-1.91123	0.122815	0.440176	0.458333
AGPS	-9.16957	0.000525188	0.0786315	0.469019
AGR2	2.36638	0.0719198	0.365292	1.28571
AGRN	0.282772	0.790304	0.917824	0.914358
AGSK1	-0.54221	0.614267	0.830558	0.666667
AGT	0.40548	0.704285	0.876746	0.857143
AGTPBP1	2.06014	0.102809	0.412004	0.945407
AGTR1	-1.53867	0.193046	0.523166	0.735669
AGTRAP	-0.229723	0.82871	0.933292	0.782313
AGXT2L2	-1.72822	0.153225	0.476082	0.723735
AHCTF1	0.484113	0.651679	0.851316	0.861962
AHCY	-0.879796	0.424899	0.716311	0.778943
AHCYL1	0.290211	0.784971	0.915212	0.854751
AHCYL2	-4.0061	0.013586	0.211213	0.596512
AHDC1	-1.59968	0.179192	0.5059	0.685976
AHI1	0.920122	0.40565	0.702243	0.91426
AHNAK	-0.27479	0.796041	0.919834	0.819969
AHNAK2	-2.05684	0.103212	0.412208	0.668766
AHR	-1.72904	0.153073	0.475944	0.743151
AHRR	-1.16066	0.30549	0.624315	0.766681
AHSA1	0.88108	0.424275	0.715964	0.871961
AHSA2	0.819908	0.454827	0.734476	0.900524
AIDA	0.0968482	0.927147	0.972678	0.83871
AIF1	0.00780365	0.994119	0.997781	0.642857
AIF1L	2.50476	0.0614603	0.345771	1.21622
AIFM1	0.908206	0.411262	0.705804	0.879885
AIFM2	-0.837663	0.445787	0.729473	0.752688
AIFM3	0.743484	0.49535	0.757683	1.2
AIG1	0.238087	0.822614	0.931175	0.847352
AIM1	-0.881337	0.42415	0.715964	0.62069
AIM2	0.515281	0.631447	0.840793	1.01351
AIMP1	-0.630936	0.559725	0.796485	0.798159
AIMP2	2.29961	0.0776637	0.374331	0.981967
AIP	-1.3367	0.246956	0.575292	0.75596
AJAP1	0.334665	0.7534	0.902079	0.860795
AK1	-0.734453	0.500311	0.760893	0.797078
AK2	1.07302	0.339146	0.651216	0.881691
AK3	-0.328089	0.758037	0.904211	0.812192
AK4	1.516	0.198464	0.529175	1.05517
AK5	-2.60875	0.0547194	0.329207	0.697067
AK7	-1.14994	0.309439	0.627141	0.535714
AK8	-0.218324	0.837042	0.937298	0.375
AKAP1	1.78507	0.143011	0.464191	0.946078
AKAP10	-2.4327	0.0666778	0.354132	0.717687
AKAP11	1.47905	0.207624	0.538912	0.954067
AKAP12	-2.82126	0.0433855	0.308525	0.711661
AKAP13	0.893712	0.418174	0.711179	0.878043
AKAP2	-5.18543	0.00522034	0.148556	0.00165914
AKAP3	0.415134	0.697712	0.873664	1.07143
AKAP4	1.27081	0.267509	0.590952	1.575
AKAP5	-2.3347	0.0745837	0.369561	0.658397
AKAP6	-2.10757	0.0971973	0.40464	0.726735
AKAP7	-1.09956	0.328622	0.641207	0.719595
AKAP8	1.95276	0.116847	0.432437	0.933123
AKAP8L	0.291808	0.783828	0.914803	0.854919
AKAP9	0.208992	0.843881	0.940257	0.853668
AKD1	-1.35195	0.24242	0.571133	0.709459
AKIP1	-3.23969	0.0280671	0.270875	0.686467
AKIRIN1	0.440418	0.680645	0.865912	0.857282
AKIRIN2	1.40046	0.228513	0.557273	0.907112
AKIRIN2-AS1	-0.261819	0.805397	0.923606	0.809264
AKNA	-7.13313	0.00147757	0.108716	0.534913
AKNAD1	-0.447955	0.6756	0.863456	1.07143
AKR1A1	0.234873	0.824954	0.932394	0.845548
AKR1B1	1.54599	0.191328	0.520832	0.912121
AKR1B10	0.126398	0.905047	0.965018	0.8
AKR1C1	-2.2731	0.0800826	0.377344	0.708452
AKR1C2	-2.62991	0.0534517	0.326466	0.647948
AKR1C3	-3.42564	0.0233398	0.255524	0.657979
AKR1E2	2.13796	0.0937769	0.398486	1.10806
AKR7A2	-0.621677	0.565265	0.800121	0.807947
AKR7A3	0.589669	0.58469	0.812795	1.23913
AKR7L	2.86962	0.0411953	0.303199	2.75
AKT1	0.646604	0.550435	0.790672	0.87489
AKT1S1	-1.10309	0.327241	0.640417	0.712109
AKT2	-1.04496	0.350596	0.660057	0.761734
AKT3	-2.45144	0.065275	0.352897	0.67084
AKTIP	-5.05396	0.00575919	0.153445	0.544828
ALAD	-0.0356669	0.973126	0.990894	0.831916
ALAS1	0.729934	0.502806	0.761865	0.89242
ALB	0.430118	0.687571	0.868954	1.15385
ALCAM	0.480826	0.653835	0.852382	0.861908
ALDH16A1	0.213726	0.84041	0.938747	0.850267
ALDH18A1	1.01172	0.364594	0.671423	0.891438
ALDH1A1	0.402459	0.706348	0.877795	0.875
ALDH1A2	-0.748913	0.492385	0.75575	0.5625
ALDH1A3	-0.328898	0.757466	0.904211	0.810427
ALDH1B1	2.48529	0.0628241	0.349539	0.987669
ALDH1L1	-1.30006	0.258193	0.582407	0.672414
ALDH1L2	-2.70075	0.0494447	0.320859	0.704777
ALDH2	-0.672571	0.535269	0.781814	0.798035
ALDH3A1	-0.44696	0.676265	0.863743	0.545455
ALDH3A2	1.31854	0.252467	0.579017	0.906568
ALDH3B1	-2.73551	0.0476031	0.31607	0.669145
ALDH4A1	1.14726	0.310433	0.628084	0.973315
ALDH5A1	0.557813	0.604443	0.823653	0.862308
ALDH6A1	-2.38453	0.0704411	0.360902	0.683066
ALDH7A1	-1.79383	0.141502	0.462178	0.753655
ALDH8A1	0.574859	0.593822	0.817535	0.9
ALDH9A1	5.03489	0.00584278	0.154866	1.15405
ALDOA	-1.10031	0.328327	0.641107	0.765847
ALDOC	-1.22199	0.283767	0.605184	0.766055
ALG1	1.02033	0.360921	0.667871	0.931122
ALG10	-0.728345	0.503686	0.762222	0.771049
ALG10B	0.0981673	0.926159	0.972505	0.844004
ALG11	0.396159	0.710661	0.88	0.885417
ALG12	-0.844828	0.442178	0.727548	0.770053
ALG13	1.87972	0.127559	0.444772	0.971081
ALG14	-1.60584	0.177852	0.504142	0.567961
ALG1L	-1.75153	0.148949	0.471322	0.1875
ALG2	1.63294	0.172068	0.499151	0.92366
ALG3	3.43426	0.0231444	0.254389	1.04458
ALG5	-0.361643	0.734509	0.891463	0.798403
ALG6	2.12995	0.0946654	0.40051	0.965693
ALG8	0.405476	0.704288	0.876746	0.855965
ALG9	-1.12127	0.320226	0.635293	0.787655
ALK	0.483814	0.651875	0.85139	0.854254
ALKBH1	1.50131	0.202057	0.53369	0.91519
ALKBH2	1.76818	0.14597	0.468497	0.991281
ALKBH3	-2.4969	0.0620071	0.347202	0.728384
ALKBH4	-2.96423	0.0372666	0.294781	0.665865
ALKBH5	0.574689	0.593927	0.817566	0.899017
ALKBH6	-0.356221	0.738289	0.893832	0.787709
ALKBH7	-2.65913	0.0517559	0.325191	0.610169
ALKBH8	2.43818	0.0662646	0.353521	0.960411
ALLC	1.15073	0.309146	0.626912	1.26923
ALMS1	0.933768	0.3993	0.697207	0.888687
ALOX12B	2.14273	0.093253	0.397433	6.75
ALOX5	0.0948592	0.928638	0.973234	0.857143
ALOX5AP	0.0404438	0.969528	0.989231	0.75
ALOXE3	5.06269	0.00572138	0.152973	15
ALPK1	-2.13455	0.0941547	0.39949	0.669903
ALPK2	-3.65959	0.0186509	0.233774	0.478571
ALPK3	0.0904045	0.931978	0.974477	0.5625
ALPL	-3.58047	0.0201013	0.240238	0.454955
ALS2	-0.0757814	0.942952	0.978275	0.833009
ALS2CL	0.111	0.916552	0.96958	0.75
ALS2CR11	-1.92055	0.121449	0.438772	0.272727
ALS2CR12	0.412654	0.699397	0.874391	1.40323
ALS2CR8	-0.285666	0.788227	0.916565	0.803077
ALX3	0.46581	0.663729	0.858071	0.988636
AMACR	-1.18212	0.297721	0.617012	0.6
AMBN	-4.71039	0.00751498	0.171793	0.06
AMBP	0.691791	0.524231	0.776129	1.25
AMBRA1	-0.903831	0.413339	0.706916	0.765591
AMD1	1.04484	0.350646	0.660057	0.88184
AMDHD1	-1.79554	0.141209	0.461742	0.15
AMDHD2	1.77527	0.144721	0.466288	1.08333
AMELX	0.552175	0.607982	0.826193	1.38462
AMFR	-2.20251	0.0869406	0.387866	0.727206
AMH	-0.038484	0.971004	0.990023	0.818182
AMHR2	-2.8506	0.0420415	0.305013	0.394737
AMIGO1	3.24868	0.0278144	0.270234	1.46053
AMIGO2	-2.45396	0.0650889	0.352694	0.426471
AMIGO3	0.426385	0.69009	0.869889	0.957447
AMMECR1	-0.789114	0.470841	0.744936	0.765191
AMMECR1L	2.80812	0.0440031	0.309999	0.966795
AMN	-6.14871	0.00268309	0.123501	0.340909
AMN1	-2.80074	0.0443547	0.310309	0.663043
AMOT	-5.92011	0.00311705	0.125734	0.553108
AMOTL1	-3.06348	0.0336	0.284752	0.671108
AMOTL2	-2.055	0.103437	0.412333	0.609788
AMPD2	-1.32046	0.251878	0.579017	0.731375
AMPD3	1.84035	0.133762	0.452463	1.06721
AMT	2.16581	0.0907585	0.394537	1.13672
AMTN	-1.35011	0.242961	0.571588	0.375
AMY2B	0.0939287	0.929335	0.973365	0.896341
AMZ2	-0.44202	0.679571	0.865241	0.803023
AMZ2P1	-2.02534	0.107148	0.418101	0.729167
ANAPC1	1.18123	0.29804	0.617173	0.897187
ANAPC10	-1.0424	0.351658	0.660991	0.765603
ANAPC11	-1.65528	0.167446	0.494202	0.757244
ANAPC13	-4.19142	0.0115507	0.196976	0.512866
ANAPC16	-0.804339	0.46287	0.739907	0.790288
ANAPC2	0.0363185	0.972635	0.990664	0.848723
ANAPC4	0.275881	0.795256	0.919466	0.852564
ANAPC5	0.49952	0.641632	0.845846	0.857452
ANAPC7	-0.817131	0.456253	0.735568	0.796985
ANG	-2.3204	0.0758224	0.370834	0.288462
ANGEL1	0.763454	0.484509	0.752256	0.897079
ANGEL2	0.954986	0.389589	0.690242	0.875995
ANGPT1	0.521631	0.627371	0.83848	0.912736
ANGPT2	-4.85102	0.00672804	0.164182	0.55625
ANGPTL2	0.459635	0.667822	0.860618	0.858928
ANGPTL4	-0.66006	0.542539	0.786092	0.741877
ANGPTL6	-6.01449	0.0029283	0.125413	0.0269833
ANK1	-0.957447	0.388476	0.689163	0.762295
ANK2	-3.18507	0.0296608	0.276065	0.666752
ANK3	-1.25962	0.271156	0.595133	0.763927
ANKAR	0.651709	0.54743	0.788275	0.873288
ANKDD1A	1.26335	0.269938	0.593634	1.05928
ANKDD1B	2.13709	0.0938732	0.398793	1.92857
ANKFN1	5.48929	0.0041899	0.137927	11.3616
ANKFY1	-0.613783	0.570016	0.803076	0.802749
ANKH	-2.98175	0.0365869	0.292185	0.632346
ANKHD1	0.935261	0.398609	0.697102	0.895041
ANKIB1	2.5508	0.0583673	0.338468	0.985939
ANKLE1	1.30166	0.257692	0.581874	1.17884
ANKLE2	-1.09677	0.329714	0.642005	0.775547
ANKMY1	0.0568004	0.957219	0.98356	0.817416
ANKMY2	3.26112	0.027469	0.269804	1.00873
ANKRA2	0.138408	0.896092	0.961923	0.839662
ANKRD1	-5.9475	0.00306079	0.125734	0.356838
ANKRD10	-0.738184	0.498257	0.759125	0.786522
ANKRD10-IT1	0.404433	0.705	0.877173	0.879009
ANKRD11	1.23086	0.280747	0.60239	0.893355
ANKRD12	2.33251	0.0747723	0.369624	1.05963
ANKRD13A	0.287824	0.78668	0.916087	0.849688
ANKRD13B	1.42498	0.221785	0.55128	0.961321
ANKRD13C	2.24183	0.0830447	0.384233	1.06175
ANKRD13D	0.300535	0.777592	0.912464	0.862165
ANKRD16	-0.537226	0.617425	0.832129	0.797071
ANKRD17	0.40829	0.702368	0.876373	0.854251
ANKRD18A	-1.15904	0.306083	0.624478	0.486486
ANKRD22	-0.443028	0.678895	0.864921	0.9
ANKRD23	2.78579	0.0450765	0.310467	1.01587
ANKRD24	1.47945	0.207521	0.538912	1.625
ANKRD26	2.67409	0.0509115	0.324567	1.04755
ANKRD27	-0.470009	0.660954	0.85655	0.813164
ANKRD28	-0.275976	0.795188	0.919466	0.816826
ANKRD29	1.94854	0.117439	0.432935	2.25
ANKRD30BL	1.41178	0.225383	0.554082	1.15385
ANKRD31	0.394888	0.711532	0.880553	0.882353
ANKRD32	0.245895	0.816936	0.929091	0.857143
ANKRD33B	0.579489	0.590957	0.815811	0.921875
ANKRD34A	1.49811	0.202846	0.53465	1.04441
ANKRD36	-1.47327	0.209093	0.54041	0.73724
ANKRD36B	-0.323214	0.761481	0.905939	0.780612
ANKRD36BP2	2.64488	0.0525752	0.326012	5.25
ANKRD37	-2.42623	0.0671702	0.355284	0.696172
ANKRD39	-0.658079	0.543697	0.786633	0.77027
ANKRD40	0.821652	0.453932	0.733545	0.891256
ANKRD42	0.490869	0.647263	0.848599	0.891026
ANKRD43	-2.36744	0.0718322	0.365024	0.166667
ANKRD44	0.872265	0.428574	0.718621	0.887346
ANKRD45	0.639361	0.554716	0.793291	1.02857
ANKRD46	5.92487	0.00310719	0.125734	1.24819
ANKRD49	-0.388219	0.716114	0.882739	0.804878
ANKRD5	1.18423	0.296968	0.616115	0.980114
ANKRD50	-0.70915	0.514401	0.769487	0.781818
ANKRD52	3.29401	0.0265797	0.268691	1.03465
ANKRD53	-0.843884	0.442652	0.727548	0.6
ANKRD54	-0.469016	0.66161	0.857096	0.790541
ANKRD55	0.449938	0.674276	0.862673	0.794118
ANKRD57	4.16398	0.011828	0.198956	1.13056
ANKRD6	-1.70938	0.156775	0.481242	0.749626
ANKRD62	0.611381	0.571466	0.80398	0.857143
ANKRD63	-1.28304	0.263577	0.587891	0.6
ANKRD64	2.77844	0.0454361	0.311609	1.05484
ANKRD7	2.38299	0.0705655	0.361083	1.30645
ANKRD9	-0.985153	0.376124	0.680026	0.73506
ANKS1A	-1.27655	0.265658	0.589371	0.771073
ANKS1B	-0.268449	0.80061	0.921295	0.675
ANKS3	-0.396141	0.710672	0.88	0.794681
ANKS6	2.34734	0.0735086	0.367853	1.04526
ANKZF1	0.810212	0.459823	0.737802	0.872959
ANLN	-1.92057	0.121445	0.438772	0.74528
ANO1	-2.8043	0.0441846	0.310309	0.3
ANO10	-0.35189	0.741314	0.895341	0.799559
ANO3	-0.0935578	0.929613	0.973365	0.868421
ANO4	2.45557	0.0649702	0.352531	0.972622
ANO5	-2.5285	0.0598428	0.341894	0.669725
ANO6	3.39282	0.0241025	0.260165	1.0108
ANO7	-7.23695	0.00139329	0.106527	0.307692
ANO8	-1.10093	0.328084	0.64086	0.731514
ANO9	5.66689	0.00370085	0.131701	1.63636
ANP32A	4.21276	0.0113403	0.196188	1.04381
ANP32A-IT1	-3.07968	0.0330416	0.283438	0.264706
ANP32B	1.08769	0.333292	0.646	0.889528
ANP32E	-0.0261375	0.980303	0.991926	0.832797
ANPEP	-0.905942	0.412335	0.70619	0.743697
ANTXR1	-4.907	0.00644249	0.16254	0.547663
ANTXR2	-0.957769	0.38833	0.689052	0.782422
ANUBL1	-0.563073	0.601153	0.822369	0.7867
ANXA1	-0.0448843	0.966186	0.987556	0.778075
ANXA11	0.114355	0.914043	0.968608	0.839598
ANXA13	-0.65323	0.546537	0.788216	0.733333
ANXA2	-2.05815	0.103052	0.412182	0.748533
ANXA2P2	0.978684	0.378978	0.682431	1.10294
ANXA2P3	2.02116	0.107683	0.419141	1.18966
ANXA3	-3.4654	0.0224536	0.252223	0.206897
ANXA4	-2.47547	0.0635241	0.349747	0.687755
ANXA5	-2.74866	0.0469273	0.314833	0.727316
ANXA6	-2.97926	0.0366829	0.29239	0.663362
ANXA7	0.944567	0.394333	0.693854	0.878614
AOAH	-3.14182	0.0309976	0.278919	0.357143
AOC2	3.10327	0.0322479	0.281547	1.63636
AOC3	0.633521	0.558185	0.795513	1.14706
AOX1	1.71084	0.156497	0.480636	1.00293
AP1AR	0.481532	0.653371	0.852257	0.876335
AP1B1	-3.75305	0.017093	0.229776	0.593818
AP1G1	-0.662194	0.541294	0.785725	0.792176
AP1G2	0.557701	0.604513	0.823678	0.86646
AP1M1	-1.99861	0.110616	0.424338	0.707278
AP1M2	0.620466	0.565991	0.800665	1.125
AP1S1	1.86856	0.129287	0.44707	0.97062
AP1S2	-3.78638	0.0165748	0.227553	0.69176
AP1S3	-0.516045	0.630956	0.840692	0.772277
AP2A1	-0.771811	0.480026	0.749206	0.782984
AP2A2	-1.44726	0.215838	0.545479	0.774183
AP2B1	1.09655	0.329798	0.642094	0.879185
AP2M1	-1.06725	0.341474	0.652749	0.78628
AP2S1	0.81135	0.459235	0.737322	0.882009
AP3B1	2.24291	0.0829399	0.384056	0.949766
AP3B2	0.572228	0.595454	0.818429	0.900943
AP3D1	2.12194	0.0955641	0.401867	0.952669
AP3M1	-1.25199	0.27367	0.597102	0.782237
AP3M2	1.97688	0.113523	0.427711	0.940389
AP3S1	0.936414	0.398078	0.696917	0.882618
AP3S2	0.466487	0.663281	0.857752	1
AP4B1	2.27927	0.0795128	0.376259	0.941022
AP4E1	-0.26972	0.799694	0.920906	0.817296
AP4M1	1.53929	0.1929	0.523166	1.00773
AP4S1	-1.06973	0.340473	0.651663	0.731855
APAF1	2.21023	0.08616	0.387788	0.958876
APBA1	0.28122	0.791418	0.918259	0.857143
APBA2	-0.382033	0.720376	0.885236	0.808275
APBA3	0.578206	0.59175	0.816327	0.908397
APBB1	-0.775556	0.478026	0.747982	0.775198
APBB1IP	1.87945	0.127602	0.444772	3
APBB2	1.47886	0.207672	0.538912	0.910209
APBB3	-0.238602	0.822239	0.931161	0.823058
APC	-0.506023	0.637418	0.844421	0.802928
APC2	-1.35775	0.240715	0.569039	0.704635
APCDD1	0.773887	0.478916	0.748659	1
APCDD1L	-0.538807	0.616422	0.831813	0.778846
APEH	0.133421	0.899808	0.963142	0.836253
APEX1	3.10349	0.0322405	0.281547	0.984474
APEX2	0.939677	0.396575	0.695587	0.885882
APH1A	-0.156173	0.88288	0.956869	0.821689
APH1B	2.2341	0.0837946	0.385117	1.00398
API5	3.04809	0.0341403	0.285342	1.05157
APIP	1.57635	0.184368	0.512896	0.965181
APITD1	0.0440268	0.966831	0.987748	0.838583
APLF	1.46764	0.210536	0.541624	0.965909
APLN	-1.0341	0.355116	0.663185	0.5
APLNR	-2.04633	0.104508	0.414173	0.724481
APLP1	-2.28438	0.0790434	0.375446	0.689391
APLP2	-6.40377	0.00228199	0.123501	0.598508
APOA1BP	0.0888284	0.93316	0.974666	0.838643
APOB	-0.60315	0.576456	0.80736	0.672414
APOBEC3B	-0.200991	0.849758	0.942481	0.842466
APOBEC3C	-0.648716	0.54919	0.7896	0.693833
APOBEC3D	1.62884	0.172931	0.499702	1.225
APOBEC3F	-0.738796	0.49792	0.759099	0.769912
APOBEC3G	-0.818445	0.455578	0.735001	0.718085
APOC1	-3.21783	0.0286927	0.273241	0.582645
APOD	0.060011	0.954804	0.98308	0.9375
APOE	0.0833286	0.937286	0.976048	0.837209
APOL1	0.582747	0.588947	0.814624	0.857143
APOL2	2.19544	0.0876622	0.388599	0.965934
APOL3	-1.18442	0.2969	0.616115	0.28125
APOL4	-0.762895	0.484811	0.752278	0.764423
APOL6	1.14153	0.312567	0.629563	1.04762
APOLD1	-3.52087	0.0212816	0.246637	0.535152
APOM	2.04565	0.104592	0.414281	1.69355
APOO	1.25788	0.271728	0.595601	0.898585
APOOL	-1.4781	0.207864	0.539091	0.774217
APOPT1	-0.537798	0.617062	0.832119	0.796386
APP	-0.926621	0.402615	0.699901	0.794447
APPBP2	2.12281	0.095466	0.40176	0.940288
APPL1	-0.306154	0.773588	0.911167	0.819417
APPL2	0.076113	0.942703	0.978257	0.837144
APRT	-1.00032	0.369505	0.674824	0.745591
APTX	1.06907	0.340737	0.651935	0.895968
AQP1	-1.17473	0.300376	0.619425	0.744912
AQP11	-0.937918	0.397385	0.696272	0.679245
AQP3	-0.549161	0.609878	0.827133	0.795802
AQP4	1.11547	0.322451	0.636881	1.28571
AQP5	0.307329	0.772752	0.910956	0.666667
AQP6	0.627246	0.561928	0.79811	1.3125
AQP9	-1.86861	0.129279	0.44707	0.25
AQR	3.03571	0.034582	0.286215	1.06112
ARAF	-1.16931	0.302336	0.621462	0.759152
ARAP1	-0.327685	0.758322	0.904251	0.819227
ARAP3	0.711106	0.513302	0.769098	0.87806
ARC	0.957995	0.388228	0.688944	1.00557
ARCN1	-0.272537	0.797664	0.920121	0.821887
ARF1	-0.698793	0.52025	0.773804	0.800282
ARF3	1.6554	0.167422	0.494202	0.926578
ARF4	-2.22406	0.0847808	0.385698	0.726546
ARF5	-1.34109	0.245641	0.574246	0.768363
ARF6	-3.18582	0.0296381	0.276065	0.688929
ARFGAP1	-0.0445325	0.96645	0.987556	0.836618
ARFGAP2	0.587254	0.586173	0.81349	0.88289
ARFGAP3	-4.63551	0.0079787	0.175881	0.641384
ARFGEF1	1.88763	0.12635	0.444369	0.977408
ARFGEF2	1.9783	0.113331	0.427375	0.964826
ARFIP1	-1.0208	0.360721	0.667731	0.75087
ARFIP2	0.784899	0.473066	0.745838	0.876994
ARFRP1	-3.34903	0.0251656	0.264366	0.684
ARG2	2.46796	0.0640657	0.350416	1.08706
ARGLU1	0.135815	0.898024	0.962607	0.840334
ARHGAP1	-0.69915	0.520048	0.773673	0.775347
ARHGAP10	-2.33148	0.0748608	0.369624	0.700321
ARHGAP11A	-3.12191	0.0316361	0.279757	0.701776
ARHGAP11B	1.5484	0.190768	0.520461	1.02688
ARHGAP12	5.35552	0.00461025	0.143246	1.11499
ARHGAP15	-2.05985	0.102843	0.412004	0.1875
ARHGAP17	-4.48319	0.00903189	0.18065	0.627943
ARHGAP18	-6.02925	0.00290004	0.125396	0.481419
ARHGAP19	-3.21059	0.0289033	0.274169	0.608002
ARHGAP21	-1.67961	0.162557	0.48773	0.734846
ARHGAP22	0.425227	0.690873	0.870281	0.924324
ARHGAP23	0.680169	0.530886	0.779702	0.900677
ARHGAP24	-2.86142	0.0415577	0.303638	0.421875
ARHGAP25	-1.80529	0.139553	0.460349	0.25
ARHGAP26	1.48985	0.204904	0.536437	0.912232
ARHGAP27	-1.41627	0.224153	0.553862	0.465517
ARHGAP28	0.29471	0.781752	0.914089	0.848962
ARHGAP29	1.2523	0.273568	0.597023	0.938725
ARHGAP31	-4.67629	0.00772204	0.174365	0.617278
ARHGAP32	0.0323883	0.975595	0.991612	0.834787
ARHGAP33	-0.33231	0.75506	0.903018	0.804775
ARHGAP35	1.86747	0.129456	0.447315	0.915448
ARHGAP39	-1.17588	0.299959	0.619051	0.75
ARHGAP4	-0.430207	0.687511	0.868944	0.777632
ARHGAP40	23.7473	9.05156e-06	0.00537243	8.42757
ARHGAP42	1.80287	0.139963	0.460762	0.923921
ARHGAP44	1.36786	0.23777	0.565901	1.07661
ARHGAP5	0.445311	0.677367	0.864075	0.866323
ARHGAP6	-0.152257	0.885789	0.95803	0.825127
ARHGDIA	-1.74392	0.15033	0.472702	0.612367
ARHGDIB	-1.24988	0.274372	0.59769	0.78022
ARHGDIG	-0.635495	0.557011	0.794999	0.755572
ARHGEF1	0.420147	0.69431	0.872195	0.898226
ARHGEF10	1.28116	0.264179	0.588603	0.926424
ARHGEF10L	-1.33443	0.247639	0.575435	0.744545
ARHGEF11	0.679277	0.5314	0.779946	0.867067
ARHGEF12	-2.05033	0.104012	0.41315	0.725537
ARHGEF16	-0.47125	0.660135	0.855991	0.827586
ARHGEF17	-0.788639	0.471092	0.744936	0.780618
ARHGEF18	0.788751	0.471032	0.744936	0.890816
ARHGEF19	-0.142807	0.892817	0.960993	0.81875
ARHGEF2	1.90516	0.123714	0.440757	0.965407
ARHGEF25	-0.724285	0.505939	0.764138	0.803922
ARHGEF26	1.05414	0.346814	0.658093	0.954545
ARHGEF26-AS1	0.808649	0.460632	0.738438	1.125
ARHGEF3	-1.4828	0.206674	0.538441	0.756473
ARHGEF33	-0.00398081	0.997	0.998655	0.814286
ARHGEF37	-2.63417	0.053201	0.326182	0.443787
ARHGEF38	1.3707	0.23695	0.564811	1.5
ARHGEF4	0.0984206	0.925969	0.972498	0.841216
ARHGEF40	-2.65016	0.0522702	0.325379	0.684856
ARHGEF6	-1.65666	0.167165	0.494202	0.682229
ARHGEF7	2.63536	0.053131	0.326182	0.974144
ARHGEF9	-1.21023	0.287818	0.608941	0.775839
ARID1A	0.163478	0.87746	0.954353	0.840903
ARID1B	-0.497697	0.642817	0.84678	0.811471
ARID2	-0.871119	0.429136	0.718848	0.778863
ARID3A	4.50289	0.00888672	0.179888	1.13701
ARID3B	4.60535	0.00817511	0.175881	1.45181
ARID4A	0.272137	0.797951	0.920121	0.856763
ARID4B	1.15881	0.306166	0.624547	0.916409
ARID5A	0.336655	0.752	0.901369	0.9375
ARID5B	-1.70954	0.156744	0.481235	0.766194
ARIH1	-1.02112	0.360589	0.667703	0.766155
ARIH2	-0.847624	0.440776	0.727137	0.795298
ARL1	-2.85475	0.041855	0.304548	0.689655
ARL10	0.123868	0.906935	0.96564	0.85961
ARL13B	4.21797	0.0112896	0.196188	1.08289
ARL15	-0.0624293	0.952986	0.982521	0.83053
ARL16	-0.824035	0.452713	0.73331	0.772759
ARL17A	0.0169643	0.987215	0.994823	0.84
ARL2	0.980919	0.37799	0.681397	0.90371
ARL2BP	-5.75656	0.00348013	0.129678	0.504515
ARL3	-1.24243	0.276851	0.600033	0.759016
ARL4A	5.09314	0.00559188	0.152973	1.25762
ARL4C	2.0456	0.104599	0.414281	0.92862
ARL4D	2.22518	0.0846699	0.385597	1.08993
ARL5A	-2.67863	0.0506579	0.324489	0.629321
ARL5B	3.66102	0.0186259	0.233774	1.0455
ARL6	-1.65848	0.166794	0.493758	0.72102
ARL6IP1	-0.248894	0.814759	0.928002	0.82335
ARL6IP4	-1.63254	0.172153	0.499151	0.738202
ARL6IP5	-0.17476	0.869105	0.95101	0.823947
ARL6IP6	-0.236594	0.823701	0.931692	0.813627
ARL8A	0.879698	0.424946	0.716318	0.881528
ARL8B	1.02093	0.360669	0.667731	0.913866
ARL9	0.514418	0.632002	0.840913	0.874517
ARMC1	1.1153	0.322517	0.636881	0.909336
ARMC10	-4.04963	0.0130721	0.208778	0.565691
ARMC2	1.13722	0.314182	0.63133	1.14286
ARMC3	-0.267734	0.801126	0.921422	0.409091
ARMC5	1.1292	0.317209	0.633248	0.943769
ARMC6	0.67576	0.533426	0.781231	0.890069
ARMC7	0.438814	0.681721	0.866768	0.863958
ARMC8	1.63187	0.172294	0.499151	0.921961
ARMC9	-1.71117	0.156435	0.480553	0.745316
ARMCX1	2.33519	0.074542	0.369513	0.974705
ARMCX2	0.396463	0.710452	0.88	0.85457
ARMCX3	-0.478088	0.655632	0.853717	0.805751
ARMCX4	1.53602	0.193671	0.523865	0.911808
ARMCX5	2.03026	0.106523	0.41724	0.969789
ARMCX5-GPRASP2	0.661675	0.541597	0.785759	1.075
ARMCX6	-0.73181	0.501769	0.761365	0.763006
ARNT	0.155255	0.883562	0.956981	0.842286
ARNT2	2.32948	0.0750333	0.369914	0.977432
ARNTL	0.598938	0.579021	0.808912	0.899272
ARNTL2	-0.59975	0.578526	0.808622	0.75
ARPC1A	3.81561	0.0161355	0.224684	1.00393
ARPC1B	0.181031	0.864469	0.94898	0.840342
ARPC2	0.207486	0.844987	0.940556	0.845151
ARPC3	6.72667	0.00187323	0.119277	1.21919
ARPC4	-0.452546	0.672537	0.861967	0.804206
ARPC5	-0.37679	0.723998	0.887259	0.815296
ARPC5L	1.75654	0.148047	0.470506	0.917984
ARPM1	1.33785	0.246611	0.575038	1.17073
ARPP19	3.73298	0.0174143	0.230788	1.00297
ARRB1	0.793002	0.468796	0.743692	0.870152
ARRB2	-0.210788	0.842564	0.93958	0.822581
ARRDC1	0.128928	0.903159	0.964132	0.876404
ARRDC2	0.876828	0.426344	0.716857	0.937975
ARRDC3	2.75971	0.0463676	0.313883	0.961712
ARRDC4	-2.26403	0.0809299	0.379079	0.728972
ARSA	-1.27835	0.265077	0.589334	0.641876
ARSB	-1.47779	0.207942	0.539124	0.764668
ARSD	-3.66001	0.0186435	0.233774	0.673134
ARSG	1.18095	0.29814	0.617189	0.987245
ARSI	0.167345	0.874594	0.952912	0.85
ARSJ	1.44862	0.215478	0.545479	0.946316
ARSK	-0.178405	0.86641	0.949918	0.82
ART4	-1.09212	0.331541	0.644506	0.588608
ART5	-0.623138	0.564388	0.79968	0.75
ARTN	-0.864124	0.432575	0.721494	0.65625
ARV1	-0.523873	0.625935	0.837215	0.802295
ARVCF	-2.3865	0.0702828	0.36089	0.700929
AS3MT	-0.287777	0.786714	0.916087	0.642857
ASAH1	-16.7436	4.08077e-05	0.0147431	0.351019
ASAH2	0.445784	0.677051	0.864005	0.857143
ASAH2B	1.50021	0.202328	0.533946	1.5
ASAP1	-3.10247	0.0322745	0.281547	0.620951
ASAP1-IT1	-1.84089	0.133675	0.452463	0.214286
ASAP2	-2.88374	0.0405798	0.302555	0.695526
ASAP3	0.437972	0.682286	0.86686	0.858005
ASB1	2.15333	0.0920974	0.396642	0.967463
ASB13	2.07591	0.100905	0.40921	0.980231
ASB3	0.778355	0.476536	0.747018	1.15714
ASB6	-0.859702	0.434762	0.723181	0.774863
ASB7	-0.242157	0.819652	0.930095	0.816342
ASB8	-1.46155	0.212106	0.542453	0.762953
ASB9	-2.63693	0.0530388	0.326182	0.25
ASCC1	-0.773404	0.479174	0.748792	0.799636
ASCC2	-0.891779	0.419103	0.711827	0.794462
ASCC3	-0.881262	0.424186	0.715964	0.768174
ASCL1	0.724316	0.505922	0.764138	0.885138
ASCL2	1.83243	0.135048	0.45414	2.625
ASF1A	0.642129	0.553077	0.791911	0.892122
ASF1B	0.627084	0.562025	0.798179	0.862573
ASGR1	-1.03839	0.353325	0.66257	0.45
ASH1L	1.55701	0.188771	0.517844	0.918465
ASH2L	-2.04622	0.104521	0.414173	0.731054
ASL	0.122605	0.907879	0.966006	0.840159
ASNA1	1.08795	0.333187	0.646	0.904232
ASNS	-2.11063	0.0968469	0.40442	0.696429
ASNSD1	-0.48818	0.649019	0.849362	0.808364
ASPDH	-3.15284	0.0306502	0.277651	0.642857
ASPH	4.3361	0.0102098	0.18937	1.08662
ASPHD1	-0.72171	0.507372	0.76473	0.793789
ASPHD2	1.17907	0.298814	0.617992	0.94382
ASPM	-2.30496	0.0771849	0.373194	0.687559
ASPN	-0.525882	0.62465	0.836575	0.75
ASPRV1	-1.78687	0.1427	0.463823	0.525
ASPSCR1	0.430413	0.687372	0.868944	0.872056
ASRGL1	0.50362	0.638974	0.845344	0.856515
ASS1	1.89949	0.124561	0.441852	0.955429
ASTE1	-0.169576	0.872942	0.952652	0.823105
ASTN1	-1.22673	0.28215	0.603547	0.668394
ASTN2	-0.556367	0.605349	0.824277	0.805426
ASXL1	-2.23777	0.0834378	0.384614	0.737492
ASXL2	-0.399689	0.708242	0.87874	0.797645
ASXL3	1.44075	0.217557	0.547483	1.125
ATAD1	1.38845	0.231882	0.560163	0.908061
ATAD2	-0.613038	0.570466	0.80337	0.80521
ATAD2B	-0.192574	0.855954	0.944937	0.819742
ATAD3A	0.231941	0.827092	0.932804	0.853585
ATAD3B	-1.02274	0.359899	0.667317	0.730839
ATAD3C	-2.95423	0.0376609	0.295265	0.15
ATAD5	0.415902	0.69719	0.873512	0.865021
ATAT1	0.556922	0.605001	0.824005	0.861584
ATCAY	-5.53152	0.00406689	0.137561	0.58661
ATE1	1.82435	0.136373	0.456288	0.962302
ATF1	-2.86567	0.0413697	0.30332	0.684983
ATF2	-0.664511	0.539945	0.784795	0.799512
ATF3	1.06685	0.341634	0.652749	0.992424
ATF4	-1.57744	0.184122	0.512685	0.748478
ATF5	2.30853	0.0768675	0.372483	1.04039
ATF6	0.920284	0.405574	0.702243	0.890104
ATF6B	-0.755264	0.488934	0.753765	0.788635
ATF7	-1.03422	0.355069	0.663185	0.786695
ATF7IP	-1.74804	0.14958	0.472151	0.733878
ATF7IP2	2.44739	0.0655752	0.353201	1.10948
ATG10	0.714277	0.511523	0.767799	0.870293
ATG12	-1.29651	0.259306	0.583852	0.754095
ATG13	-2.16747	0.0905819	0.394182	0.742026
ATG14	5.45723	0.00428629	0.139949	1.17494
ATG16L1	3.1233	0.0315909	0.279757	0.994301
ATG16L2	1.25586	0.272395	0.59604	0.966258
ATG2A	1.38078	0.234059	0.562034	0.985507
ATG2B	1.67208	0.164055	0.48975	0.921606
ATG3	2.83215	0.0428809	0.30666	1.0267
ATG4A	0.415463	0.697488	0.873607	0.893617
ATG4B	-1.1582	0.306389	0.624617	0.755797
ATG4C	1.11104	0.324159	0.638082	0.932681
ATG4D	1.24693	0.27535	0.598802	1.0066
ATG5	-5.80868	0.00335913	0.128914	0.551381
ATG7	0.773576	0.479082	0.748718	0.872845
ATG9A	-0.794856	0.467822	0.742999	0.784623
ATG9B	0.87891	0.42533	0.716697	0.907895
ATHL1	-1.80239	0.140043	0.460776	0.644796
ATIC	1.8692	0.129187	0.446911	0.93612
ATL1	-0.583894	0.58824	0.814107	0.79806
ATL2	0.506057	0.637396	0.844421	0.856679
ATL3	2.98093	0.0366186	0.292202	1.01143
ATM	-0.313289	0.768515	0.908648	0.812627
ATMIN	-8.6561	0.00066742	0.0803758	0.536631
ATN1	-6.26885	0.00248435	0.123501	0.567223
ATOH8	-1.89073	0.12588	0.443503	0.71751
ATOX1	-1.13689	0.314306	0.63133	0.760294
ATP10A	0.842746	0.443225	0.727645	1.125
ATP10B	0.703894	0.517364	0.77223	1.25
ATP10D	-0.426003	0.690348	0.869959	0.815627
ATP11A	-0.73398	0.500571	0.761004	0.781712
ATP11B	-2.24638	0.0826059	0.383144	0.712722
ATP11C	-1.99926	0.11053	0.424272	0.693353
ATP13A1	0.374177	0.725806	0.888022	0.86875
ATP13A2	-0.434486	0.68463	0.867943	0.794014
ATP13A3	4.30387	0.0104917	0.19224	1.18764
ATP13A4	1.86227	0.130271	0.448073	2.5
ATP1A1	-0.177072	0.867395	0.950434	0.82508
ATP1A1OS	-0.0308776	0.976733	0.991811	0.822581
ATP1A2	1.69661	0.159228	0.48394	2
ATP1A3	-0.1677	0.874331	0.952912	0.825835
ATP1B1	-0.62298	0.564483	0.79968	0.805847
ATP1B2	1.51807	0.197965	0.528745	1.59524
ATP1B3	-2.634	0.053211	0.326182	0.699794
ATP2A1	1.39199	0.230884	0.559241	1.13636
ATP2A2	-0.716668	0.510185	0.766956	0.801849
ATP2A3	-1.30347	0.257126	0.581825	0.726562
ATP2B1	-1.64409	0.169745	0.496742	0.755933
ATP2B2	-0.513376	0.632673	0.841212	0.804255
ATP2B3	-0.447737	0.675745	0.863529	0.8
ATP2B4	-1.31982	0.252074	0.579017	0.777512
ATP2C1	0.247351	0.815879	0.928407	0.845654
ATP2C2	0.942821	0.395132	0.694281	1.2
ATP5A1	0.0617555	0.953492	0.982572	0.836091
ATP5B	1.94939	0.11732	0.432935	0.923848
ATP5C1	-0.452105	0.67283	0.86208	0.809053
ATP5D	-0.161687	0.878788	0.955485	0.820873
ATP5E	0.24323	0.818872	0.929818	1.03896
ATP5EP2	2.34205	0.073956	0.368428	6
ATP5F1	0.226882	0.830784	0.934407	0.843424
ATP5G1	-1.04943	0.348751	0.659641	0.763243
ATP5G2	-4.23723	0.0111046	0.196188	0.603245
ATP5G3	0.724627	0.505749	0.764081	0.865328
ATP5H	-0.731946	0.501694	0.761365	0.791512
ATP5I	0.315726	0.766786	0.907804	0.84946
ATP5J	-1.50588	0.200931	0.532835	0.757183
ATP5J2	-1.00522	0.367386	0.673301	0.783144
ATP5L	-0.688623	0.52604	0.777696	0.799634
ATP5O	-0.806026	0.461993	0.739474	0.789227
ATP5S	-0.854416	0.437386	0.725037	0.746231
ATP5SL	-2.22022	0.0851614	0.386271	0.73688
ATP6AP1	0.633755	0.558046	0.795513	0.868377
ATP6AP1L	-1.78397	0.143202	0.464465	0.513158
ATP6AP2	-0.194732	0.854364	0.944193	0.823816
ATP6V0A1	-0.590543	0.584154	0.812271	0.8006
ATP6V0A2	1.8759	0.128147	0.445842	0.93599
ATP6V0B	-1.07902	0.336743	0.649685	0.756212
ATP6V0C	-1.533	0.194387	0.524946	0.746229
ATP6V0D1	0.91898	0.406184	0.702725	0.887178
ATP6V0E1	2.85606	0.0417966	0.304548	1.00419
ATP6V0E2	-2.53831	0.059189	0.340367	0.578676
ATP6V1A	-3.55038	0.0206874	0.244006	0.539268
ATP6V1B1	0.0249141	0.981225	0.991926	0.834081
ATP6V1B2	0.728266	0.50373	0.762222	0.865973
ATP6V1C1	3.28601	0.0267928	0.268831	0.993842
ATP6V1C2	1.14853	0.309959	0.62778	1.28571
ATP6V1D	-0.349098	0.743268	0.896463	0.817911
ATP6V1E1	0.155588	0.883315	0.956869	0.843527
ATP6V1E2	-0.320319	0.76353	0.906883	0.833787
ATP6V1F	-1.78013	0.143871	0.465535	0.636955
ATP6V1G1	2.62802	0.0535637	0.326589	0.960149
ATP6V1G2	-0.887694	0.421072	0.713696	0.781337
ATP6V1H	0.289322	0.785608	0.915436	0.846688
ATP7A	-0.27104	0.798742	0.920615	0.822402
ATP7B	-1.2704	0.267641	0.591009	0.706215
ATP8A1	-0.843568	0.442811	0.727548	0.775966
ATP8A2	1.64051	0.170488	0.49719	1.11702
ATP8B1	-0.486127	0.650361	0.85085	0.784404
ATP8B2	2.44384	0.0658402	0.353201	1.02588
ATP8B3	-1.28749	0.262159	0.586686	0.678571
ATP8B4	-1.50241	0.201786	0.533516	0.230769
ATP9A	-1.63196	0.172274	0.499151	0.761552
ATP9B	-0.962374	0.386254	0.687138	0.704782
ATPAF1	-1.89849	0.12471	0.442004	0.745877
ATPAF2	1.65622	0.167256	0.494202	0.967363
ATPBD4	-0.655815	0.545022	0.787285	0.755556
ATPIF1	-1.11459	0.322789	0.637101	0.754015
ATR	2.12746	0.0949438	0.400651	0.995181
ATRIP	1.002	0.368778	0.674145	0.921992
ATRN	0.125899	0.905419	0.965056	0.840323
ATRNL1	-2.44212	0.0659688	0.353201	0.717906
ATRX	0.251004	0.813227	0.92702	0.858328
ATXN1	4.40431	0.00964217	0.184374	1.16908
ATXN10	-1.33753	0.246707	0.575038	0.773318
ATXN1L	2.2934	0.0782225	0.374513	0.958286
ATXN2	-0.722758	0.506788	0.764553	0.793435
ATXN2L	-0.940773	0.396072	0.694923	0.779289
ATXN3	1.99653	0.110891	0.424338	0.983682
ATXN7	0.185731	0.860999	0.947613	0.845712
ATXN7L1	0.852409	0.438386	0.725299	0.877358
ATXN7L2	3.3562	0.0249877	0.263832	1.15098
ATXN7L3	1.03604	0.354307	0.662582	0.905288
ATXN7L3B	6.39442	0.00229536	0.123501	1.22655
AUH	1.84981	0.132243	0.450414	1.01481
AUP1	0.317319	0.765656	0.90764	0.853194
AURKA	0.305999	0.773698	0.911167	0.848995
AURKAIP1	0.460462	0.667272	0.860392	0.857253
AURKAPS1	1.34084	0.245716	0.574287	1.1
AURKB	-0.44294	0.678955	0.864921	0.81563
AUTS2	0.373532	0.726253	0.888178	0.853268
AVEN	0.0475965	0.964144	0.986618	0.832776
AVIL	-1.15669	0.306945	0.625115	0.685039
AVL9	3.91829	0.0146973	0.216513	1.16262
AVPI1	-0.822472	0.453513	0.73345	0.756637
AVPR2	-3.70037	0.0179514	0.232892	0.0604204
AXIN1	0.10544	0.920713	0.971395	0.850446
AXIN2	0.327965	0.758124	0.904211	0.871542
AXL	-2.39391	0.0696904	0.359238	0.607317
AZGP1	-2.58438	0.056221	0.333335	0.405405
AZI1	0.111639	0.916074	0.969388	0.835484
AZI2	1.02872	0.357377	0.664898	0.883019
AZIN1	0.85463	0.437279	0.725037	0.88106
B2M	0.464406	0.664658	0.858738	0.855997
B3GALNT1	-2.93393	0.0384763	0.29686	0.64836
B3GALNT2	-6.70369	0.00189922	0.12047	0.397219
B3GALT1	-0.560932	0.602491	0.822744	0.792654
B3GALT2	-0.933811	0.399279	0.697207	0.755682
B3GALT4	-1.19717	0.29238	0.612821	0.583333
B3GALT5	-0.809271	0.460311	0.738336	0.736607
B3GALT6	0.755282	0.488924	0.753765	0.915217
B3GALTL	-0.196929	0.852747	0.943529	0.813433
B3GAT1	0.844537	0.442324	0.727548	0.884118
B3GAT3	-1.59518	0.18018	0.507184	0.734848
B3GNT1	-0.230165	0.828388	0.933292	0.817225
B3GNT2	3.26997	0.0272262	0.269804	0.980732
B3GNT3	-0.809123	0.460387	0.73835	0.45
B3GNT4	0.877431	0.42605	0.716797	1.875
B3GNT5	-0.956518	0.388896	0.689587	0.73663
B3GNT7	0.835678	0.44679	0.730108	0.970588
B3GNT8	1.34681	0.243938	0.572681	1.8
B3GNT9	-1.48123	0.207072	0.538912	0.732474
B3GNTL1	-0.476196	0.656876	0.854464	0.794118
B4GALNT1	-0.11762	0.911603	0.967366	0.82768
B4GALNT3	-0.971916	0.381983	0.684844	0.692797
B4GALNT4	-0.472681	0.659191	0.855466	0.808945
B4GALT1	-4.66739	0.0077772	0.175185	0.545643
B4GALT2	-1.5611	0.187831	0.516472	0.722733
B4GALT3	-0.347274	0.744544	0.897012	0.815274
B4GALT4	1.07002	0.340356	0.651663	0.90176
B4GALT5	5.20353	0.00515097	0.148556	1.10395
B4GALT6	1.6939	0.159754	0.484569	1.19091
B4GALT7	0.428654	0.688559	0.869475	0.877246
B7H6	-1.58495	0.182443	0.510442	0.735484
B9D1	-0.204702	0.847031	0.941534	0.775
B9D2	1.32982	0.249029	0.576386	1.01351
BAALC	-2.99523	0.0360738	0.289808	0.567391
BAAT	0.156545	0.882604	0.956869	0.875
BABAM1	-2.6937	0.0498274	0.32203	0.705774
BACE1	-0.925742	0.403024	0.700246	0.794142
BACE1-AS	-0.152824	0.885367	0.957792	0.825581
BACE2	-1.22805	0.281699	0.602983	0.698864
BACH1	-2.3114	0.076613	0.371964	0.659341
BACH2	5.47498	0.00423261	0.138788	1.22053
BAD	-2.71508	0.0486756	0.318543	0.681592
BAG1	0.757021	0.487982	0.753417	0.866816
BAG2	1.79347	0.141564	0.462178	0.928479
BAG3	-0.961061	0.386845	0.687812	0.787168
BAG4	0.785653	0.472667	0.745603	0.896141
BAG5	1.43668	0.218641	0.549047	0.915985
BAG6	-1.48912	0.205087	0.536493	0.740703
BAHCC1	0.748089	0.492834	0.75575	0.875
BAHD1	-2.28029	0.0794182	0.376133	0.722672
BAI1	-0.758925	0.486952	0.753075	0.748752
BAI2	-1.21308	0.286831	0.608172	0.720571
BAI3	-0.883878	0.422917	0.714856	0.758045
BAIAP2	0.647093	0.550146	0.790497	0.893216
BAIAP2L1	-1.45971	0.212582	0.542524	0.25
BAIAP2L2	1.96105	0.115693	0.431584	1.5
BAIAP3	-2.40568	0.0687606	0.357551	0.340909
BAK1	0.972664	0.38165	0.684844	0.893054
BAMBI	-0.129464	0.902759	0.963953	0.827381
BANF1	-1.0419	0.351864	0.661047	0.767761
BANK1	0.875714	0.426887	0.717553	1.75
BANP	3.46079	0.0225542	0.252921	1.14732
BAP1	-1.46578	0.211012	0.541957	0.752811
BARD1	-0.829766	0.44979	0.731629	0.767613
BASP1	0.66268	0.541011	0.785452	0.868026
BATF	9.82321	0.000393816	0.0674725	9.28297
BATF2	-1.94773	0.117552	0.432935	0.272727
BATF3	0.672379	0.53538	0.781814	0.945652
BAX	-0.822785	0.453352	0.73331	0.783346
BAZ1A	3.12959	0.0313879	0.279397	1.00125
BAZ1B	-3.34964	0.0251504	0.264366	0.682971
BAZ2A	0.257541	0.808491	0.924793	0.858943
BAZ2B	-1.23969	0.277771	0.600316	0.763317
BBC3	-0.0973331	0.926784	0.972608	0.869565
BBIP1	-1.4452	0.21638	0.546009	0.727538
BBOX1	2.19859	0.0873397	0.387866	3
BBS1	-0.160786	0.879457	0.9558	0.826087
BBS10	-0.678436	0.531884	0.780106	0.796748
BBS12	0.541382	0.614791	0.83087	0.92
BBS2	-0.712693	0.512412	0.768285	0.795955
BBS4	-2.22947	0.0842484	0.385538	0.658981
BBS5	-0.171948	0.871186	0.951952	0.823333
BBS7	0.747629	0.493085	0.75575	0.870968
BBS9	-2.26634	0.0807132	0.378598	0.707224
BBX	-1.4587	0.212844	0.542524	0.761149
BCAM	-3.33265	0.0255771	0.265833	0.333333
BCAN	-1.76566	0.146416	0.4694	0.703704
BCAP29	-0.0632927	0.952337	0.982302	0.830132
BCAP31	-0.0787609	0.940715	0.977109	0.829369
BCAR1	0.797376	0.466503	0.742285	0.923174
BCAR3	-1.4167	0.224036	0.553862	0.763736
BCAS1	2.05501	0.103436	0.412333	1.3
BCAS2	0.96946	0.383079	0.685121	0.913713
BCAS3	-1.94916	0.117351	0.432935	0.659204
BCAS4	0.35675	0.73792	0.893832	0.859684
BCAT1	0.848857	0.440159	0.726876	0.888184
BCAT2	0.331452	0.755664	0.903091	0.859967
BCCIP	0.331076	0.755929	0.903241	0.85576
BCDIN3D	-0.79672	0.466846	0.74244	0.780564
BCHE	1.00227	0.368661	0.674145	0.921468
BCKDHA	-0.690326	0.525067	0.776796	0.784051
BCKDHB	-0.236418	0.823829	0.931692	0.820665
BCKDK	0.561382	0.602209	0.822622	0.88836
BCL10	-2.84466	0.0423096	0.306026	0.717054
BCL11A	0.337646	0.751302	0.900932	0.853735
BCL11B	4.62496	0.00804678	0.175881	1.07536
BCL2	2.15229	0.0922099	0.396642	0.976338
BCL2L1	-4.84912	0.00673801	0.164182	0.628683
BCL2L11	4.4783	0.0090684	0.181009	1.22195
BCL2L12	0.468188	0.662156	0.857239	0.872951
BCL2L13	-1.21884	0.284849	0.606133	0.781618
BCL2L15	-8.73683	0.000642196	0.0803758	0.160714
BCL2L2	-1.25023	0.274253	0.597588	0.723247
BCL3	-1.03915	0.35301	0.662527	0.652812
BCL6	-0.733948	0.500589	0.761004	0.786164
BCL6B	2.94683	0.0379556	0.295543	2.25
BCL7A	3.71232	0.0177524	0.232671	1.14783
BCL7B	1.24434	0.276213	0.599503	0.90553
BCL7C	-2.18366	0.0888783	0.391578	0.662119
BCL9	0.564739	0.600113	0.821726	0.868266
BCL9L	-0.284837	0.788822	0.917	0.819062
BCLAF1	0.908252	0.41124	0.705804	0.89371
BCO2	-0.931369	0.40041	0.698186	0.670213
BCOR	-1.99536	0.111046	0.424344	0.746705
BCORL1	2.50242	0.0616229	0.346147	1.01812
BCR	0.700456	0.519308	0.772986	0.886706
BCS1L	-1.31224	0.254404	0.580637	0.752704
BDH1	1.22	0.284449	0.605664	0.895683
BDH2	0.0330831	0.975071	0.991612	0.835706
BDKRB1	-0.326278	0.759316	0.904806	0.792
BDKRB2	1.92671	0.120553	0.437152	0.926937
BDNF	2.88546	0.0405057	0.302429	1.1281
BDNF-AS1	-1.97145	0.114262	0.429216	0.588785
BDP1	-3.18289	0.0297265	0.276065	0.580394
BECN1	-6.30535	0.00242754	0.123501	0.496757
BEGAIN	1.30616	0.256289	0.581629	0.956897
BEND3	3.74327	0.0172487	0.230319	1.04273
BEND4	5.54075	0.00404058	0.137042	1.22556
BEND5	-4.64744	0.00790256	0.175813	0.534091
BEND6	-0.77792	0.476768	0.747018	0.781421
BEND7	0.0540284	0.959304	0.984401	0.9
BEST1	1.11185	0.323844	0.637976	1.03846
BEST4	1.98626	0.112258	0.426441	5.25
BET1	-3.79332	0.0164692	0.226575	0.589513
BET1L	-2.30483	0.077197	0.373194	0.626014
BEX1	1.47024	0.209867	0.540657	0.92886
BEX2	3.29019	0.0266813	0.268831	1.07727
BEX4	0.608686	0.573097	0.805055	0.860077
BEX5	1.81133	0.138537	0.459634	1.66667
BFAR	1.80579	0.139469	0.460255	0.925549
BFSP1	-0.386046	0.717609	0.883562	0.8
BGN	-1.56346	0.187291	0.516324	0.734442
BHLHB9	-0.232627	0.826592	0.932697	0.81769
BHLHE40	-1.30543	0.256516	0.581632	0.767089
BHLHE41	0.764644	0.483869	0.751913	1.03125
BICC1	-2.31479	0.0763142	0.371599	0.621454
BICD1	2.76408	0.0461481	0.313035	0.98977
BICD2	1.31899	0.252327	0.579017	0.897878
BID	1.6096	0.177036	0.503338	0.913483
BIN1	7.058	0.00154243	0.110015	1.25901
BIN3	-0.130419	0.902047	0.963534	0.816
BIRC2	-0.649238	0.548883	0.789283	0.794022
BIRC3	4.203	0.0114359	0.196529	1.37195
BIRC5	-4.17336	0.0117323	0.198636	0.580085
BIRC6	1.12824	0.317574	0.633266	0.905722
BIVM	-2.31728	0.0760958	0.371433	0.687958
BK250D10.8	-0.109594	0.917604	0.969927	0.910112
BLCAP	0.824234	0.452611	0.733276	0.918367
BLK	-1.61815	0.1752	0.502263	0.346154
BLM	-0.587458	0.586048	0.81349	0.795075
BLMH	-0.818173	0.455718	0.735019	0.78575
BLNK	0.17002	0.872613	0.952634	0.75
BLOC1S1	-0.545421	0.612237	0.828969	0.762712
BLOC1S2	-3.76823	0.0168547	0.229776	0.540027
BLOC1S3	-1.09949	0.328648	0.641207	0.735669
BLVRA	-1.04384	0.351059	0.660581	0.776247
BLVRB	0.0647446	0.951245	0.982302	0.813253
BLZF1	0.493676	0.645433	0.848075	0.871055
BMF	-4.20927	0.0113744	0.196188	0.62637
BMI1	4.51318	0.00881205	0.17925	1.275
BMP1	-0.564005	0.600571	0.821975	0.79144
BMP2K	0.598548	0.579259	0.808966	0.862587
BMP4	-1.28304	0.263577	0.587891	0.6
BMP5	-2.86658	0.0413294	0.30332	0.619266
BMP6	-9.34431	0.000485408	0.076518	0.377698
BMP7	-0.265534	0.802713	0.921991	0.814417
BMP8A	0.0275937	0.979206	0.991926	1
BMP8B	-0.907149	0.411763	0.705955	0.521739
BMPER	0.0991596	0.925416	0.972498	0.875
BMPR1A	-3.34488	0.0252692	0.264366	0.679581
BMPR1B	-3.5132	0.0214392	0.247429	0.572785
BMPR2	-2.11964	0.0958235	0.402551	0.672274
BMS1	0.998477	0.370303	0.675306	0.881194
BMS1P1	1.95489	0.116549	0.432437	1.85
BMS1P4	2.61968	0.0540605	0.327787	1.07042
BMS1P5	-1.82676	0.135976	0.45578	0.446809
BMX	-1.5353	0.193843	0.524123	0.351562
BNC2	-6.81508	0.00177718	0.117054	0.478814
BNIP1	-1.25367	0.273116	0.596441	0.741964
BNIP2	2.51164	0.0609866	0.34483	1.03853
BNIP3	-0.0915655	0.931107	0.973947	0.827091
BNIP3L	-2.38263	0.070594	0.361096	0.712197
BNIPL	0.25064	0.813492	0.927195	0.780822
BOC	-2.87029	0.0411659	0.303118	0.689076
BOD1	0.100757	0.924219	0.972127	0.838202
BOD1L	0.592285	0.583086	0.811516	0.877106
BOK	-0.75673	0.488139	0.753439	0.742991
BOLA1	-5.02263	0.00589729	0.155113	0.560044
BOLA2	1.54824	0.190805	0.520461	0.969512
BOLA3	0.830677	0.449327	0.73131	0.892263
BOLA3-AS1	-1.00915	0.365696	0.672028	0.769702
BOP1	-0.781154	0.47505	0.746156	0.749463
BORA	0.366788	0.730931	0.890437	0.857778
BPGM	-2.66917	0.0511873	0.324863	0.596106
BPHL	-0.0617048	0.953531	0.982572	0.833787
BPNT1	-1.74331	0.150443	0.472702	0.75476
BPTF	0.967334	0.384029	0.685927	0.897842
BRAF	-0.219953	0.83585	0.937032	0.820021
BRAP	-2.38393	0.0704893	0.361005	0.71819
BRAT1	-0.740863	0.496786	0.758274	0.761512
BRCA1	-4.40989	0.0095974	0.184374	0.531985
BRCA2	1.51606	0.19845	0.529175	0.988364
BRCC3	-0.644399	0.551736	0.791254	0.773821
BRD1	-0.51659	0.630606	0.840692	0.812569
BRD2	-0.389802	0.715025	0.881854	0.814818
BRD3	-3.21466	0.0287847	0.273826	0.674315
BRD4	2.50809	0.0612309	0.345182	0.94746
BRD7	-2.26652	0.0806963	0.378598	0.718005
BRD8	-2.76702	0.0460016	0.312679	0.715775
BRD9	1.57634	0.18437	0.512896	0.929134
BRE	-2.31965	0.0758875	0.371043	0.72086
BREA2	-1.42497	0.221786	0.55128	0.3
BRF1	-2.85363	0.0419053	0.304686	0.638652
BRF2	-1.7647	0.146587	0.4694	0.685943
BRI3	1.38429	0.233061	0.561258	0.904437
BRI3BP	-1.61616	0.175625	0.50262	0.625984
BRIP1	-0.165	0.876332	0.953813	0.825018
BRIX1	2.63533	0.0531329	0.326182	0.993929
BRK1	1.21634	0.285706	0.607025	0.886817
BRMS1	-1.28693	0.262335	0.586777	0.733223
BRMS1L	1.95041	0.117177	0.432842	0.994415
BROX	-4.90142	0.0064703	0.162575	0.578086
BRP44	0.200222	0.850324	0.942638	0.843061
BRP44L	-1.58248	0.182993	0.511032	0.736074
BRPF1	-0.166651	0.875108	0.953053	0.815517
BRPF3	1.74647	0.149866	0.472322	0.940625
BRSK1	-0.121692	0.90856	0.966421	0.834052
BRSK2	0.75679	0.488107	0.753439	0.95339
BRWD1	0.052186	0.96069	0.984909	0.836826
BRWD3	-0.628351	0.561268	0.797892	0.775849
BSCL2	0.886279	0.421755	0.714395	1.01504
BSDC1	1.55374	0.189527	0.51848	0.962647
BSG	-2.20841	0.0863435	0.387788	0.584937
BSN	0.222819	0.833754	0.936226	0.862685
BSN-AS2	-0.96243	0.386229	0.687138	0.692308
BST1	-0.672794	0.53514	0.781814	0.743243
BST2	-0.5668	0.598829	0.820677	0.757895
BTAF1	2.32044	0.0758187	0.370834	0.978695
BTBD1	-3.08863	0.0327379	0.282825	0.681065
BTBD10	1.06443	0.342617	0.653459	0.880902
BTBD11	4.32792	0.0102804	0.189991	1.14878
BTBD16	-17.0171	3.80643e-05	0.0140576	0.0202699
BTBD19	0.091205	0.931378	0.974115	0.8625
BTBD2	-0.0279237	0.978958	0.991926	0.825848
BTBD3	-1.42367	0.222138	0.551716	0.764629
BTBD6	-0.286397	0.787703	0.916565	0.817832
BTBD7	3.60534	0.0196317	0.237602	1.07513
BTBD8	-1.1932	0.293782	0.61398	0.5
BTBD9	-3.63175	0.0191469	0.236292	0.695214
BTD	-2.83216	0.0428807	0.30666	0.579832
BTF3	0.361283	0.73476	0.891532	0.853982
BTF3L4	3.00245	0.0358027	0.289118	1.00132
BTG1	0.0569669	0.957094	0.98356	0.83908
BTG2	0.208882	0.843962	0.940257	0.848616
BTG3	3.04006	0.0344263	0.285779	1.02042
BTK	0.524395	0.625601	0.83703	1
BTN1A1	-5.80543	0.00336654	0.128914	0.274648
BTN2A1	-1.62224	0.174328	0.500953	0.75185
BTN2A2	3.61517	0.0194496	0.236788	1.056
BTN2A3P	1.61949	0.174913	0.501776	1.04464
BTN3A1	-0.843496	0.442847	0.727548	0.762195
BTN3A2	0.29125	0.784227	0.914845	0.860558
BTN3A3	-2.10377	0.0976341	0.404812	0.715789
BTNL8	-1.03661	0.35407	0.66257	0.5
BTRC	2.94788	0.0379138	0.295543	0.976215
BUB1	0.0722806	0.945582	0.979627	0.838704
BUB1B	-0.405967	0.703953	0.876746	0.810264
BUB3	0.0216637	0.983674	0.993116	0.835866
BUD13	0.267706	0.801146	0.921422	0.846273
BUD31	1.59011	0.181296	0.509204	0.917728
BVES	-3.76478	0.0169085	0.229776	0.682614
BYSL	-4.71226	0.00750378	0.171793	0.560403
BZRAP1	-0.90766	0.411521	0.705955	0.740426
BZW1	1.04229	0.351702	0.660991	0.881654
BZW2	-0.802991	0.463572	0.740494	0.801405
C10orf10	-1.68708	0.161086	0.48636	0.756356
C10orf11	-0.687698	0.526568	0.778039	0.6
C10orf111	-1.30023	0.25814	0.582407	0.45
C10orf114	-2.0264	0.107013	0.418066	0.640127
C10orf116	2.45054	0.0653414	0.353001	2
C10orf118	0.913968	0.40854	0.703651	0.892473
C10orf12	2.75451	0.0466302	0.314232	1.122
C10orf122	-0.277596	0.794022	0.91906	1
C10orf125	-3.847	0.0156789	0.222898	0.607221
C10orf128	-1.01389	0.363665	0.670283	0.586957
C10orf131	-1.37748	0.235003	0.562673	0.409091
C10orf136	-0.979453	0.378637	0.682048	0.633333
C10orf137	-0.0119566	0.990989	0.997102	0.836757
C10orf140	-0.102824	0.922671	0.971752	0.830249
C10orf2	1.302	0.257585	0.581825	0.907551
C10orf25	2.71957	0.0484377	0.318151	1.03665
C10orf26	-10.6807	0.000277015	0.0582061	0.458076
C10orf28	-1.25033	0.274221	0.597588	0.773895
C10orf32	1.19807	0.292066	0.612573	0.951355
C10orf35	-1.36551	0.238452	0.566768	0.713467
C10orf46	4.20982	0.0113689	0.196188	1.09223
C10orf47	2.78252	0.0452359	0.310595	1.13839
C10orf54	-0.954204	0.389943	0.690513	0.705882
C10orf55	1.24966	0.274444	0.597691	1.5
C10orf57	-0.128739	0.9033	0.964167	0.824841
C10orf58	0.149303	0.887984	0.958647	0.843183
C10orf68	1.2848	0.263014	0.587266	1.08333
C10orf76	-2.43337	0.0666273	0.353989	0.720048
C10orf81	1.4564	0.213442	0.543237	1.5
C10orf82	-1.98375	0.112595	0.427024	0.687845
C10orf85	-0.413948	0.698518	0.874184	0.681818
C10orf88	0.347144	0.744636	0.897012	0.86014
C10orf90	2.09217	0.0989815	0.406008	1.41892
C10orf93	-0.156303	0.882784	0.956869	1.03846
C11orf1	-0.693211	0.523423	0.775758	0.782452
C11orf10	0.321472	0.762714	0.90642	0.859263
C11orf2	-0.990746	0.373671	0.677889	0.749369
C11orf21	1.07182	0.33963	0.651509	1.5
C11orf24	-1.12853	0.317462	0.633266	0.734673
C11orf30	2.5911	0.0558021	0.332274	0.964346
C11orf31	-0.741329	0.496531	0.758023	0.796089
C11orf35	0.659949	0.542604	0.786092	0.9375
C11orf41	-1.24075	0.277414	0.600304	0.757155
C11orf45	0.758419	0.487226	0.753229	1.05682
C11orf46	-1.62396	0.173964	0.500504	0.734767
C11orf48	0.335825	0.752584	0.901744	0.850597
C11orf49	-4.60049	0.00820726	0.175881	0.606818
C11orf51	-0.0840828	0.93672	0.975753	0.824189
C11orf54	2.02582	0.107087	0.418101	0.989405
C11orf57	-0.845195	0.441994	0.727548	0.769117
C11orf58	3.79448	0.0164516	0.226519	1.01621
C11orf61	0.0657128	0.950517	0.982138	0.838538
C11orf63	0.301602	0.776831	0.912453	0.821429
C11orf65	1.57874	0.183831	0.51217	1.36765
C11orf66	-1.23551	0.279175	0.60122	0.75
C11orf67	0.0258353	0.980531	0.991926	0.835389
C11orf68	-3.2694	0.0272419	0.269804	0.593953
C11orf70	2.23641	0.0835695	0.384614	3.5
C11orf71	-2.1919	0.0880257	0.389795	0.525
C11orf73	1.29532	0.259682	0.584459	0.898368
C11orf74	2.30462	0.0772154	0.373194	0.958763
C11orf75	0.194017	0.854891	0.944329	0.847098
C11orf80	-1.33719	0.246811	0.575199	0.753499
C11orf82	1.10682	0.325792	0.639798	0.890126
C11orf83	-0.354444	0.739529	0.894551	0.8
C11orf84	1.61467	0.175946	0.503055	0.9537
C11orf87	2.28189	0.0792713	0.37576	1.875
C11orf9	4.13474	0.0121322	0.201626	1.16407
C11orf91	1.53823	0.19315	0.523166	2
C11orf95	5.82932	0.00331264	0.128328	1.16129
C11orf96	-8.2423	0.000817424	0.081836	0.489914
C12orf10	1.66964	0.164542	0.490499	0.967779
C12orf11	0.386038	0.717615	0.883562	0.855837
C12orf23	-0.454496	0.671238	0.861666	0.802234
C12orf24	1.46561	0.211058	0.541957	0.927293
C12orf26	0.798304	0.466017	0.742047	0.978659
C12orf28	0.524327	0.625645	0.83703	1.8
C12orf29	0.65467	0.545692	0.787706	0.879443
C12orf32	-1.22137	0.283981	0.605294	0.754415
C12orf34	1.75922	0.147564	0.470416	0.941831
C12orf35	0.795186	0.46765	0.74288	0.886853
C12orf4	2.14458	0.0930501	0.397353	0.94696
C12orf41	-1.70368	0.157866	0.482008	0.764
C12orf43	0.317046	0.76585	0.90764	0.847966
C12orf44	0.789721	0.470521	0.744936	0.938188
C12orf45	0.854953	0.437119	0.725037	0.957831
C12orf47	1.80874	0.138971	0.459744	0.944674
C12orf48	-1.60021	0.179076	0.505874	0.752305
C12orf49	1.33787	0.246605	0.575038	0.895735
C12orf5	-2.43792	0.0662838	0.353521	0.714876
C12orf51	-1.74947	0.149322	0.471872	0.744161
C12orf52	-0.271013	0.798762	0.920615	0.807129
C12orf53	0.91412	0.408469	0.703651	0.901269
C12orf57	-1.15304	0.308291	0.626046	0.736262
C12orf60	-0.501592	0.640288	0.845728	0.793814
C12orf61	-0.406797	0.703386	0.876746	0.666667
C12orf62	-0.28796	0.786583	0.916087	0.807519
C12orf65	-2.57205	0.0569989	0.334959	0.652012
C12orf66	-4.29607	0.0105614	0.192571	0.668
C12orf68	1.24753	0.27515	0.598635	0.964286
C12orf69	-1.26384	0.269778	0.593634	0.559701
C12orf73	1.73689	0.15162	0.474058	0.938917
C12orf75	-4.63822	0.00796136	0.175881	0.611214
C12orf76	1.23053	0.280859	0.60239	0.956757
C13orf15	0.511006	0.634201	0.842273	1
C13orf16	2.14778	0.0927006	0.397353	5.25
C13orf27	3.98356	0.0138615	0.212921	1.01455
C14orf1	-3.09071	0.0326675	0.282825	0.649718
C14orf101	-0.766196	0.483035	0.751503	0.798701
C14orf102	-0.336025	0.752443	0.901681	0.815393
C14orf109	-1.13848	0.313711	0.631029	0.762743
C14orf118	-0.00801237	0.993961	0.99778	0.83731
C14orf119	-1.67714	0.163048	0.488145	0.756802
C14orf126	1.52903	0.195333	0.526217	0.923966
C14orf128	-0.386864	0.717046	0.883409	0.776549
C14orf129	2.40832	0.0685537	0.356698	1.02128
C14orf132	0.836214	0.446519	0.729993	0.870758
C14orf133	0.939289	0.396753	0.695799	0.897059
C14orf135	0.349624	0.742899	0.896279	0.852561
C14orf142	1.01007	0.3653	0.671691	0.966667
C14orf149	-2.09405	0.0987623	0.405668	0.684744
C14orf159	-0.681394	0.530182	0.779329	0.787101
C14orf162	1.13875	0.313609	0.630901	0.957055
C14orf166	-1.50337	0.201548	0.533365	0.750692
C14orf167	1.36989	0.237184	0.565209	0.928479
C14orf169	-4.26896	0.0108076	0.194175	0.649791
C14orf176	-0.398823	0.708835	0.878799	0.789474
C14orf178	-1.35346	0.241973	0.570709	0.375
C14orf180	1.11064	0.324312	0.638165	1.22727
C14orf182	-0.985649	0.375906	0.680002	0.5
C14orf2	1.34756	0.243716	0.572518	0.915409
C14orf21	0.832065	0.448622	0.731065	0.883886
C14orf28	1.24382	0.276389	0.599577	0.926087
C14orf33	-1.66827	0.164818	0.49058	0.735577
C14orf37	1.64616	0.169319	0.496105	0.986111
C14orf39	2.62095	0.0539845	0.327673	1.26866
C14orf43	0.484664	0.651319	0.85127	0.865313
C14orf45	1.01662	0.362499	0.669433	1
C14orf49	0.390773	0.714357	0.881799	0.858407
C14orf50	4.62031	0.00807695	0.175881	1.84615
C14orf55	-0.0976007	0.926584	0.972534	0.882353
C14orf64	-0.0824718	0.937929	0.976184	0.833333
C14orf79	-0.159271	0.880581	0.956325	0.846939
C14orf80	-1.18681	0.296048	0.615479	0.762799
C14orf82	-1.0003	0.369511	0.674824	0.571429
C14orf93	-2.48247	0.0630241	0.349747	0.708131
C15orf17	-5.96327	0.00302897	0.125734	0.560758
C15orf23	-2.74549	0.0470895	0.314833	0.716294
C15orf24	-0.0277119	0.979117	0.991926	0.834774
C15orf29	0.650282	0.548269	0.788939	0.879082
C15orf33	-0.347496	0.744389	0.897012	0.797297
C15orf37	0.142217	0.893256	0.961164	0.885542
C15orf38	-0.215825	0.838872	0.93789	0.816832
C15orf39	1.62919	0.172858	0.499702	1.05578
C15orf40	-1.50871	0.20024	0.531786	0.70751
C15orf41	1.86661	0.12959	0.447375	1.0094
C15orf42	-0.340605	0.749223	0.899663	0.809805
C15orf44	2.48152	0.0630919	0.349747	0.947575
C15orf48	1.75398	0.148507	0.470819	1.26667
C15orf52	-1.69933	0.158702	0.48323	0.727099
C15orf57	-1.40588	0.227009	0.556302	0.764984
C15orf58	0.138169	0.89627	0.961923	0.916667
C15orf59	-3.65112	0.0188002	0.234742	0.667808
C15orf61	-1.36735	0.237917	0.565901	0.688811
C16orf13	0.0824098	0.937976	0.976184	0.834816
C16orf42	-0.417378	0.696188	0.873069	0.775444
C16orf45	2.05195	0.103813	0.412842	0.949474
C16orf46	-1.74638	0.149882	0.472322	0.621429
C16orf47	3.63063	0.0191672	0.236292	2.33333
C16orf48	1.05775	0.345337	0.656652	0.898281
C16orf5	-0.829084	0.450137	0.731836	0.758917
C16orf52	3.34457	0.0252769	0.264366	1.12209
C16orf53	-0.580161	0.590542	0.815647	0.808417
C16orf55	-0.29482	0.781674	0.914089	0.813333
C16orf57	2.80089	0.0443476	0.310309	0.960269
C16orf58	-0.47724	0.65619	0.853931	0.810881
C16orf59	0.15553	0.883358	0.956869	0.841812
C16orf61	-0.555144	0.606116	0.824848	0.794304
C16orf62	-1.70007	0.158559	0.483026	0.766051
C16orf7	-1.10348	0.327091	0.640377	0.723214
C16orf70	-1.75972	0.147475	0.470416	0.721731
C16orf71	-1.30192	0.25761	0.581825	0.375
C16orf72	1.58787	0.181793	0.509652	0.90817
C16orf73	1.62462	0.173823	0.500392	1.5
C16orf74	4.65537	0.00785245	0.175494	2.14286
C16orf79	-1.81991	0.137107	0.457474	0.626087
C16orf80	-0.293027	0.782956	0.914644	0.81891
C16orf86	-3.17275	0.0300348	0.276481	0.529412
C16orf87	0.197707	0.852174	0.943334	0.846601
C16orf88	1.21588	0.285865	0.607129	0.900756
C16orf91	-0.831384	0.448967	0.731222	0.77933
C16orf93	-0.815202	0.457247	0.736206	0.698276
C16orf95	-1.9584	0.11606	0.432024	0.538043
C17orf100	0.280364	0.792033	0.918474	0.877358
C17orf101	-3.7505	0.0171334	0.229776	0.691576
C17orf103	-0.700348	0.51937	0.773008	0.716561
C17orf104	1.27665	0.265626	0.589371	2.38235
C17orf106-CDK3	7.3657	0.00129674	0.101653	1.63636
C17orf107	3.75545	0.0170551	0.229776	6
C17orf108	3.48747	0.0219784	0.250426	1.53
C17orf28	0.297482	0.779771	0.913701	0.85
C17orf39	-0.537541	0.617225	0.832119	0.795105
C17orf42	-1.58583	0.182247	0.510242	0.712733
C17orf48	-0.683534	0.528953	0.77879	0.722477
C17orf51	2.26767	0.080589	0.378443	1.09677
C17orf53	0.0525435	0.960421	0.984771	0.842505
C17orf56	-4.71993	0.0074582	0.171793	0.571295
C17orf57	-0.489941	0.647869	0.848926	0.789474
C17orf58	0.478794	0.655168	0.853645	0.875252
C17orf59	-1.18717	0.29592	0.615479	0.746377
C17orf61	-0.435826	0.683728	0.867367	0.802198
C17orf62	-1.64225	0.170126	0.496894	0.729296
C17orf63	3.88957	0.0150837	0.218741	1.05501
C17orf64	1.99547	0.111031	0.424344	3
C17orf65	-2.16345	0.0910094	0.395214	0.646067
C17orf67	2.40885	0.0685124	0.356654	3
C17orf69	0.476539	0.656651	0.854237	0.871681
C17orf70	-1.1538	0.308011	0.625797	0.732696
C17orf72	1.29606	0.25945	0.584071	1.875
C17orf75	-1.22437	0.282956	0.604427	0.73931
C17orf76	-0.870059	0.429655	0.7193	0.675
C17orf76-AS1	-0.832431	0.448436	0.731065	0.787679
C17orf79	-0.502938	0.639416	0.845485	0.808769
C17orf80	0.305628	0.773962	0.911198	0.848873
C17orf81	-1.34243	0.245242	0.573797	0.739813
C17orf82	0.835767	0.446745	0.730108	0.972973
C17orf85	-0.0313857	0.97635	0.991811	0.83368
C17orf89	-0.151084	0.88666	0.958262	0.820675
C17orf90	-0.089678	0.932523	0.974666	0.833333
C17orf96	0.138841	0.89577	0.961923	0.839141
C17orf97	0.467966	0.662303	0.857295	0.923077
C18orf1	-1.81428	0.138043	0.458736	0.681263
C18orf10	-0.325593	0.759799	0.904974	0.819718
C18orf18	-0.9224	0.404583	0.701329	0.72
C18orf19	1.22293	0.283446	0.605028	1.00696
C18orf21	2.5238	0.0601594	0.342745	1.1771
C18orf23	-0.100238	0.924608	0.972273	0.75
C18orf25	1.27249	0.266965	0.590472	0.904804
C18orf32	1.62627	0.173473	0.500252	1.22222
C18orf45	-3.92354	0.0146278	0.216255	0.542793
C18orf54	-0.253356	0.811522	0.925973	0.819433
C18orf55	0.859119	0.43505	0.723372	0.892818
C18orf56	-1.11764	0.321615	0.636429	0.306818
C18orf8	-0.104476	0.921434	0.971459	0.8249
C19orf10	0.401259	0.707169	0.878424	0.852368
C19orf12	0.829295	0.450029	0.731836	0.893949
C19orf18	-1.25221	0.273598	0.597023	0.545455
C19orf2	3.09885	0.0323948	0.282175	1.00257
C19orf20	0.324252	0.760747	0.905454	0.923529
C19orf21	2.29569	0.0780163	0.374513	2.0625
C19orf22	-1.26399	0.269729	0.593634	0.685015
C19orf23	-1.56502	0.186935	0.515888	0.535714
C19orf24	-0.556064	0.605539	0.824468	0.797431
C19orf25	-0.920396	0.405521	0.702243	0.759777
C19orf26	-0.361253	0.734781	0.891532	0.806306
C19orf28	-0.52636	0.624345	0.836503	0.792994
C19orf29	-0.11824	0.91114	0.967366	0.81753
C19orf29-AS1	-0.138983	0.895664	0.961923	0.428571
C19orf33	-0.814952	0.457375	0.736329	0.545455
C19orf39	1.68741	0.161021	0.48636	1.14
C19orf40	1.66889	0.164693	0.49058	1.28571
C19orf42	0.25295	0.811817	0.926182	0.848939
C19orf43	-0.562235	0.601676	0.822523	0.787759
C19orf44	1.31892	0.252349	0.579017	0.95788
C19orf45	-0.0738816	0.944379	0.979041	0.847826
C19orf47	-0.643487	0.552275	0.791636	0.753906
C19orf48	-2.03873	0.105455	0.415694	0.712224
C19orf50	-0.74604	0.493953	0.75666	0.78537
C19orf51	0.372581	0.726911	0.888458	0.75
C19orf52	-1.1541	0.3079	0.625797	0.755455
C19orf53	-0.00788515	0.994057	0.99778	0.825843
C19orf54	-3.66609	0.0185373	0.233387	0.480469
C19orf55	-1.27371	0.266573	0.590233	0.732692
C19orf56	-1.39458	0.230156	0.558693	0.721107
C19orf57	1.77589	0.144613	0.466282	1.12941
C19orf6	-0.210052	0.843103	0.939867	0.819961
C19orf60	-4.93159	0.00632168	0.161135	0.595463
C19orf63	-0.650056	0.548402	0.789013	0.789964
C19orf66	3.07897	0.0330658	0.283438	1.04386
C19orf68	0.673851	0.534529	0.781502	0.924658
C19orf70	-1.20198	0.290692	0.611532	0.747801
C19orf71	-0.878251	0.425651	0.716706	0.6
C19orf73	-1.8575	0.131022	0.448959	0.428571
C19orf76	0.99573	0.371497	0.676442	1.10294
C19orf77	1.455	0.213807	0.543645	2.5
C19orf79	-1.90194	0.124194	0.441211	0.724662
C1D	3.36051	0.0248816	0.263365	1.01834
C1GALT1	-0.391279	0.71401	0.881746	0.8076
C1GALT1C1	-0.934161	0.399118	0.697207	0.744444
C1orf101	-1.72504	0.153819	0.476835	0.362069
C1orf106	-0.813455	0.458147	0.736771	0.702128
C1orf109	-3.50738	0.0215598	0.247789	0.653983
C1orf110	2.42528	0.0672429	0.355471	2.31818
C1orf112	0.821607	0.453955	0.733545	0.889344
C1orf114	0.302519	0.776178	0.912453	0.864964
C1orf115	-6.68136	0.00192489	0.121634	0.383721
C1orf116	-0.440408	0.680652	0.865912	0.9
C1orf122	-4.42403	0.00948513	0.184374	0.592373
C1orf123	-1.70838	0.156966	0.481474	0.762153
C1orf124	4.78977	0.00705804	0.168531	1.08588
C1orf126	-0.199043	0.851191	0.942749	0.790909
C1orf127	-3.27902	0.0269808	0.268983	0.3
C1orf129	-2.10265	0.0977637	0.404812	0.115385
C1orf131	2.81553	0.0436538	0.308914	0.979532
C1orf133	-0.913806	0.408617	0.70371	0.48
C1orf135	1.91118	0.122822	0.440176	0.935673
C1orf144	-6.60996	0.00200985	0.1228	0.517759
C1orf151	-0.442184	0.679461	0.865241	0.805106
C1orf159	-1.95781	0.116143	0.432097	0.692308
C1orf162	0.484644	0.651332	0.85127	0.972973
C1orf173	1.12134	0.320201	0.635293	1.5
C1orf174	-1.79577	0.141171	0.461742	0.689947
C1orf183	-1.77934	0.144009	0.465678	0.673673
C1orf190	-1.2186	0.28493	0.606152	0.583333
C1orf194	-1.17254	0.301166	0.620284	0.428571
C1orf198	-0.443975	0.678261	0.864453	0.809032
C1orf201	0.136926	0.897196	0.96234	0.85443
C1orf204	-0.0900334	0.932256	0.974477	0.833333
C1orf21	-0.232427	0.826738	0.932697	0.820197
C1orf212	-1.38795	0.232023	0.560217	0.721839
C1orf213	-1.45047	0.214992	0.545027	0.557143
C1orf216	1.33806	0.24655	0.575038	0.929241
C1orf220	-0.386014	0.717632	0.883562	0.77027
C1orf226	0.963237	0.385867	0.687138	1.125
C1orf227	1.36281	0.239236	0.567227	2.0625
C1orf228	-1.04926	0.348821	0.659641	0.409091
C1orf229	-2.10941	0.0969863	0.404429	0.125
C1orf27	-0.0926041	0.930328	0.973744	0.828717
C1orf31	0.747067	0.493392	0.755963	0.907579
C1orf35	-2.99576	0.0360541	0.289808	0.697034
C1orf38	0.104686	0.921277	0.971459	0.851351
C1orf43	2.25282	0.0819901	0.381572	0.931491
C1orf50	-1.45385	0.214109	0.543996	0.729851
C1orf51	3.64306	0.0189436	0.235229	1.2
C1orf52	-5.21124	0.00512179	0.148403	0.629794
C1orf54	-0.807081	0.461446	0.739158	0.675
C1orf55	1.44851	0.215508	0.545479	0.9309
C1orf56	-0.31385	0.768117	0.908613	0.786058
C1orf61	-1.14674	0.310624	0.628164	0.736162
C1orf63	0.349685	0.742857	0.896279	0.85812
C1orf70	-1.8655	0.129763	0.447415	0.54
C1orf74	0.719752	0.508463	0.765346	0.91129
C1orf85	0.377677	0.723384	0.886986	0.889789
C1orf86	-0.510414	0.634582	0.842403	0.773756
C1orf9	2.27855	0.0795789	0.376267	1.00714
C1orf93	-3.13148	0.0313272	0.279397	0.5625
C1orf95	2.04962	0.1041	0.41315	1.30263
C1orf96	-3.72521	0.0175405	0.231036	0.686405
C1QA	1.2106	0.287691	0.608941	1.09615
C1QB	0.475165	0.657555	0.85461	0.886364
C1QBP	-1.96847	0.11467	0.429283	0.720788
C1QC	0.844196	0.442495	0.727548	1.26923
C1QL1	0.965846	0.384696	0.686561	1.3
C1QL3	1.48548	0.206	0.537638	1.66667
C1QL4	-1.35823	0.240573	0.568878	0.751603
C1QTNF1	-5.6346	0.00378443	0.132967	0.465634
C1QTNF2	-1.1639	0.304304	0.62347	0.6
C1QTNF3	-1.4744	0.208805	0.540014	0.571429
C1QTNF4	1.89616	0.125061	0.442371	3.75
C1QTNF6	-2.30737	0.0769702	0.372826	0.698085
C1R	-0.307412	0.772692	0.910956	0.815814
C1RL	-2.13307	0.0943185	0.399681	0.71978
C1S	-0.432966	0.685652	0.868521	0.810624
C2	0.812987	0.458389	0.736831	0.964286
C20orf103	2.01062	0.109043	0.422133	1.01838
C20orf107	2.47589	0.0634939	0.349747	1.5
C20orf108	-1.08024	0.336252	0.648958	0.772532
C20orf11	-1.69835	0.158892	0.483455	0.753026
C20orf111	1.3738	0.236057	0.563815	0.898218
C20orf112	1.48599	0.205871	0.537528	0.914778
C20orf118	2.41508	0.068028	0.356654	1.8
C20orf132	2.59701	0.0554368	0.331065	1.43284
C20orf134	-2.37173	0.0714807	0.36384	0.431818
C20orf152	-3.13987	0.0310592	0.278919	0.136364
C20orf165	-0.744403	0.494847	0.757563	0.795918
C20orf166-AS1	0.319218	0.764311	0.907136	1.17391
C20orf177	2.27625	0.0797913	0.3766	0.946411
C20orf194	3.93705	0.0144511	0.215589	1.01942
C20orf195	-0.0105341	0.992061	0.997285	0.875
C20orf196	-0.854204	0.437491	0.725037	0.743243
C20orf20	1.67021	0.164429	0.49042	0.907686
C20orf24	-0.784707	0.473167	0.745907	0.73125
C20orf26	0.842491	0.443352	0.727783	1.35
C20orf27	1.21635	0.285704	0.607025	0.917388
C20orf29	-1.11748	0.321677	0.636429	0.710733
C20orf3	2.2702	0.0803531	0.377655	0.961519
C20orf30	-1.54129	0.192431	0.52235	0.760944
C20orf4	0.496297	0.643727	0.847105	0.865772
C20orf43	-0.137422	0.896826	0.962113	0.827636
C20orf46	1.03161	0.356161	0.664331	1.5
C20orf7	-0.027231	0.97948	0.991926	0.829082
C20orf72	-3.1157	0.0318383	0.279757	0.699975
C20orf94	0.148833	0.888334	0.958763	0.833333
C20orf96	-0.63637	0.556491	0.794509	0.759214
C21orf119	-2.95123	0.0377799	0.295543	0.444915
C21orf2	-0.984356	0.376475	0.68029	0.729452
C21orf30	-1.42639	0.221401	0.550987	0.580645
C21orf33	-0.882223	0.42372	0.715703	0.776978
C21orf49	1.43203	0.219884	0.550563	1.25
C21orf56	-0.300525	0.777599	0.912464	0.766544
C21orf58	-0.458407	0.668637	0.861022	0.789838
C21orf59	-0.509793	0.634983	0.84256	0.807309
C21orf63	1.90061	0.124393	0.441634	0.980769
C21orf67	-0.000229257	0.999827	0.999946	0.794118
C21orf7	-2.0496	0.104103	0.41315	0.285714
C21orf88	1.16502	0.303894	0.623174	1.42241
C21orf90	0.871407	0.428994	0.718848	1
C21orf91	0.534391	0.619226	0.833655	0.871982
C22orf13	-0.707133	0.515537	0.770547	0.784768
C22orf23	0.154057	0.884451	0.957487	0.857143
C22orf24	0.862759	0.433249	0.721806	1.2
C22orf25	0.993589	0.37243	0.676683	0.945032
C22orf26	6.48196	0.00217383	0.123501	2
C22orf28	-0.578965	0.591281	0.81589	0.802848
C22orf29	-1.10972	0.324669	0.638363	0.753019
C22orf32	-0.532071	0.620702	0.834341	0.79864
C22orf36	-2.44748	0.0655686	0.353201	0.675573
C22orf39	0.454434	0.671279	0.861666	0.87306
C22orf40	1.0852	0.334279	0.646803	0.955882
C22orf43	2.19859	0.0873397	0.387866	3
C22orf46	0.615441	0.569016	0.802688	0.864266
C2CD2	-0.952004	0.390942	0.691471	0.771049
C2CD2L	-2.01002	0.109121	0.422133	0.716484
C2CD3	-2.95707	0.0375486	0.295265	0.715449
C2CD4C	1.15593	0.307223	0.625126	1.1625
C2CD4D	3.02405	0.0350044	0.286994	1.875
C2orf15	-0.219834	0.835937	0.937032	1
C2orf18	0.292833	0.783094	0.914692	0.870199
C2orf27A	-1.31453	0.253699	0.579794	0.619186
C2orf28	-0.782761	0.474198	0.745934	0.793838
C2orf29	-0.0253679	0.980883	0.991926	0.833249
C2orf3	0.192498	0.85601	0.944937	0.84409
C2orf40	1.27958	0.264685	0.5892	1.2
C2orf42	-0.338102	0.750982	0.900697	0.794118
C2orf43	-3.26217	0.0274401	0.269804	0.562926
C2orf44	2.91318	0.0393305	0.299146	1.00696
C2orf47	0.694071	0.522933	0.775337	0.874532
C2orf48	-1.26477	0.269472	0.593392	0.6
C2orf49	-0.376264	0.724362	0.887425	0.817227
C2orf55	2.07243	0.101322	0.4098	1.14407
C2orf56	0.507719	0.636322	0.843649	0.866304
C2orf61	1.69332	0.159868	0.48465	4.5
C2orf63	3.0331	0.0346762	0.286576	1.05032
C2orf66	0.602989	0.576554	0.807429	0.857143
C2orf67	1.13671	0.314374	0.63133	0.890071
C2orf68	-1.25923	0.271285	0.59518	0.759706
C2orf69	5.32013	0.00472982	0.144494	1.22908
C2orf70	4.70583	0.00754229	0.171831	1.5
C2orf72	-1.65397	0.167714	0.494366	0.357143
C2orf73	1.1144	0.322862	0.637101	1.18421
C2orf74	0.702794	0.517985	0.772403	0.886969
C2orf76	-1.38737	0.232187	0.560289	0.722938
C2orf77	0.643073	0.552519	0.791676	0.75
C2orf81	-1.35338	0.241999	0.570709	0.646341
C2orf84	-1.39325	0.230532	0.559056	0.25
C2orf88	-0.490885	0.647252	0.848599	0.66
C3	-0.349329	0.743106	0.896398	0.805184
C3AR1	-1.91351	0.12248	0.439998	0.3
C3orf14	1.38376	0.233211	0.561283	0.981908
C3orf15	0.716523	0.510266	0.766956	1.36364
C3orf17	-0.710498	0.513644	0.769098	0.802106
C3orf18	-4.39024	0.0097561	0.1855	0.59933
C3orf19	0.893955	0.418057	0.711179	0.913344
C3orf21	-2.95528	0.0376191	0.295265	0.702684
C3orf23	1.28609	0.262605	0.586985	0.938247
C3orf25	0.830021	0.44966	0.731561	1.92857
C3orf26	0.771933	0.47996	0.749174	0.892296
C3orf32	-1.28506	0.262931	0.587162	0.4
C3orf33	-3.34517	0.0252618	0.264366	0.636364
C3orf35	-0.825932	0.451744	0.732534	0.5625
C3orf37	0.449605	0.674498	0.862799	0.862734
C3orf38	-0.916864	0.407178	0.703039	0.793909
C3orf39	2.57726	0.0566684	0.3344	0.946721
C3orf45	2.60655	0.0548531	0.329207	4.5
C3orf52	2.75325	0.0466937	0.314232	2.8125
C3orf54	1.17181	0.301429	0.620507	1.06154
C3orf55	3.45611	0.022657	0.253049	1.2551
C3orf58	0.131215	0.901453	0.963386	0.836406
C3orf62	0.158509	0.881146	0.956609	0.84507
C3orf64	3.29654	0.0265125	0.268691	1.10364
C3orf67	-0.601065	0.577725	0.808251	0.799107
C3orf71	-0.104394	0.921496	0.971459	0.833333
C3orf75	-1.49506	0.203604	0.53514	0.72255
C3orf78	-1.28975	0.261443	0.586122	0.647368
C3orf80	-0.328309	0.757882	0.904211	0.757426
C4B	-1.85209	0.131879	0.450077	0.272727
C4orf10	-0.779526	0.475914	0.746586	0.753641
C4orf14	-1.49105	0.204603	0.536252	0.755308
C4orf19	8.66892	0.000663336	0.0803758	32.1115
C4orf21	0.980629	0.378118	0.681407	0.91689
C4orf27	0.762752	0.484887	0.752278	0.889317
C4orf29	-0.182623	0.863294	0.948477	0.809874
C4orf3	-0.0597473	0.955002	0.983087	0.832192
C4orf32	-0.832007	0.448651	0.731065	0.751908
C4orf33	-0.505188	0.637959	0.844732	0.8
C4orf34	-0.402449	0.706355	0.877795	0.805804
C4orf36	2.69176	0.0499339	0.322264	1.5
C4orf38	-1.74194	0.150694	0.472702	0.3
C4orf39	-0.875275	0.427102	0.717623	0.66
C4orf41	0.473259	0.65881	0.855038	0.863888
C4orf42	-0.985165	0.376119	0.680026	0.735123
C4orf43	2.16849	0.0904731	0.394056	0.973702
C4orf44	0.967158	0.384108	0.685948	1
C4orf46	-4.64311	0.0079301	0.175881	0.608269
C4orf47	0.73838	0.498149	0.759125	1.36364
C4orf48	0.993769	0.372351	0.676683	0.977941
C4orf49	-2.96037	0.0374181	0.294996	0.514599
C4orf50	3.17012	0.0301151	0.276481	1.5
C4orf52	-0.33404	0.75384	0.902392	0.802817
C4orf7	0.175736	0.868383	0.950531	0.84375
C5	0.822942	0.453272	0.73331	0.895466
C5orf13	2.40213	0.0690397	0.357915	0.950648
C5orf15	1.2085	0.288421	0.609489	0.892636
C5orf17	-0.843266	0.442963	0.727548	0.611842
C5orf22	0.176495	0.867822	0.950526	0.847026
C5orf24	-7.44366	0.00124222	0.100805	0.505492
C5orf25	-0.573752	0.594508	0.818095	0.798684
C5orf28	0.16801	0.874102	0.952912	0.869718
C5orf30	0.444965	0.677599	0.864246	0.854015
C5orf32	2.61034	0.0546227	0.329142	1.04651
C5orf34	-0.88962	0.420143	0.712557	0.788764
C5orf35	0.832577	0.448361	0.731065	0.888158
C5orf4	-3.15411	0.0306107	0.277651	0.707746
C5orf41	-0.138262	0.896201	0.961923	0.830813
C5orf42	1.00887	0.365816	0.672052	0.920396
C5orf43	-2.63859	0.0529417	0.326182	0.653838
C5orf44	1.35934	0.240249	0.568762	0.901711
C5orf45	-0.823182	0.453149	0.73331	0.75641
C5orf46	-1.05675	0.345745	0.656904	0.537736
C5orf47	-1.74787	0.149611	0.472152	0.662791
C5orf51	1.00185	0.36884	0.674145	0.899381
C5orf54	-3.1314	0.03133	0.279397	0.607724
C5orf55	-0.767754	0.482198	0.750954	0.744755
C5orf56	0.876658	0.426427	0.716924	1.05682
C5orf62	-0.193306	0.855414	0.944661	0.816532
C5orf63	0.70684	0.515702	0.770724	0.895735
C5orf65	-0.437929	0.682315	0.86686	0.642857
C6	-1.11	0.324561	0.638253	0.661417
C6orf1	-2.78378	0.0451746	0.310467	0.619718
C6orf105	-5.18543	0.00522034	0.148556	0.00844307
C6orf106	-1.79499	0.141303	0.461812	0.7606
C6orf108	-0.240682	0.820725	0.930485	0.804828
C6orf112	2.27114	0.080265	0.377655	0.982759
C6orf115	2.96602	0.0371965	0.294781	0.997948
C6orf118	-0.514097	0.632209	0.84099	0.75
C6orf120	8.21326	0.000829421	0.0825398	1.27196
C6orf124	0.727914	0.503925	0.762309	1.03448
C6orf125	1.51685	0.198259	0.529175	0.906173
C6orf130	-1.26039	0.270904	0.594814	0.723913
C6orf132	-2.27546	0.0798639	0.376634	0.444444
C6orf136	-1.55372	0.189531	0.51848	0.702489
C6orf138	-0.033601	0.974681	0.991567	0.675
C6orf141	5.93983	0.00307642	0.125734	1.84821
C6orf145	-4.76284	0.00720921	0.170185	0.520661
C6orf147	-1.0626	0.343358	0.653982	0.642857
C6orf154	-0.852727	0.438227	0.725299	0.4
C6orf162	-0.599153	0.57889	0.808912	0.768595
C6orf163	-0.0208598	0.98428	0.993426	0.957447
C6orf164	-0.878882	0.425344	0.716697	0.709091
C6orf168	-1.39669	0.229565	0.558324	0.773438
C6orf170	1.44823	0.215582	0.545479	0.979107
C6orf174	-0.0190766	0.985623	0.99427	0.833369
C6orf183	-1.15841	0.306313	0.624617	0.5
C6orf186	-1.48773	0.205434	0.537055	0.486842
C6orf192	-0.673036	0.535	0.781709	0.799412
C6orf195	2.71516	0.0486718	0.318543	5.25
C6orf203	0.146818	0.889833	0.95952	0.842031
C6orf204	3.1507	0.0307173	0.277651	1.02122
C6orf208	-0.301939	0.776591	0.912453	0.766667
C6orf211	1.20037	0.291257	0.611822	0.921132
C6orf223	-4.84166	0.0067773	0.164426	0.196429
C6orf225	-1.81067	0.138647	0.459634	0.7176
C6orf226	-1.25451	0.272839	0.596306	0.65
C6orf228	3.56622	0.0203764	0.242229	1.12984
C6orf27	1.70483	0.157645	0.481864	0.967742
C6orf35	-1.94533	0.117891	0.433326	0.74026
C6orf47	-0.674337	0.534248	0.781502	0.798913
C6orf48	-4.47771	0.0090728	0.181009	0.65244
C6orf52	1.88384	0.126928	0.444369	1.15714
C6orf57	1.3105	0.254942	0.580756	0.926773
C6orf62	-2.9331	0.0385101	0.296982	0.66
C6orf64	-0.254818	0.810464	0.925393	0.814366
C6orf70	-0.446944	0.676276	0.863743	0.812977
C6orf72	0.568132	0.597999	0.819979	0.864694
C6orf81	-0.269828	0.799616	0.920906	0.707547
C6orf89	-2.35935	0.0725018	0.365947	0.72012
C6orf94	2.87464	0.0409754	0.302784	4.5
C6orf99	5.78144	0.00342173	0.129383	8
C7	-6.1368	0.00270381	0.123501	0.488794
C7orf10	6.20445	0.00258859	0.123501	1.29787
C7orf11	1.0579	0.345276	0.656652	0.885714
C7orf13	0.233205	0.82617	0.932673	0.845178
C7orf23	-0.0514003	0.961282	0.985111	0.823389
C7orf25	-0.830221	0.449559	0.731539	0.760181
C7orf26	0.660423	0.542328	0.786092	0.878085
C7orf28B	-1.13114	0.316476	0.632605	0.73852
C7orf29	-5.69648	0.00362621	0.131171	0.597692
C7orf30	-1.45837	0.212929	0.542658	0.755649
C7orf31	-1.18375	0.29714	0.616115	0.709016
C7orf36	0.886718	0.421543	0.714203	0.87931
C7orf40	0.837973	0.44563	0.729399	0.876707
C7orf41	-1.50639	0.200806	0.532673	0.770531
C7orf42	-2.37075	0.0715603	0.364134	0.731941
C7orf43	1.38507	0.232841	0.561161	1.11513
C7orf44	-0.883011	0.423337	0.715318	0.769959
C7orf46	1.18385	0.297104	0.616115	0.912162
C7orf47	-0.827212	0.451091	0.732526	0.735849
C7orf49	-0.982233	0.37741	0.680752	0.779916
C7orf50	-0.782842	0.474155	0.745934	0.741673
C7orf51	-0.971171	0.382315	0.684844	0.687351
C7orf52	4.02711	0.0133351	0.209998	1.53896
C7orf53	-0.0813987	0.938735	0.976448	0.813253
C7orf54	-1.16784	0.30287	0.621801	0.576923
C7orf55	-0.184486	0.861918	0.947744	0.818942
C7orf58	2.77049	0.0458288	0.311887	2.7
C7orf59	-1.24863	0.274784	0.598101	0.693916
C7orf60	1.31523	0.253484	0.579615	0.995192
C7orf61	-2.81922	0.0434807	0.308914	0.28125
C7orf63	2.74794	0.0469641	0.314833	2.45455
C7orf64	-0.191567	0.856696	0.945282	0.810419
C7orf68	-0.593028	0.582631	0.811154	0.802048
C7orf70	0.423539	0.692014	0.870926	0.859756
C7orf73	-2.03494	0.105931	0.416365	0.755634
C7orf74	0.527811	0.623418	0.835935	0.867259
C8G	1.93302	0.119645	0.435288	2.625
C8orf12	-3.78321	0.0166233	0.227751	0.482759
C8orf31	-0.715293	0.510955	0.767527	0.730769
C8orf33	-0.135304	0.898405	0.962651	0.828623
C8orf34	0.586831	0.586433	0.81372	1
C8orf37	-5.65126	0.00374102	0.132281	0.48694
C8orf38	0.935606	0.39845	0.697102	0.928186
C8orf4	-1.64719	0.169105	0.495745	0.581461
C8orf40	-1.04878	0.349016	0.659641	0.778613
C8orf42	-0.502845	0.639476	0.845485	0.772059
C8orf44	2.63245	0.0533021	0.326182	1.18571
[truncated: 14,621 more rows]
