# Supplementary material for: A Theoretical / Empirical study of void closure in heavy plate hot rolling of tool steel
Source: Oxford University Press journal article supplement (doi:10.1158/2159-8290.cd-16-0861), 2009-01-01
Supplement: 21598290cd160861-sup-169577_3_supp_4578658_p4f33t.docx [file 21598290cd160861-sup-169577_3_supp_4578658_p4f33t.docx]

**Supplemental Information**

**Cross-cohort analysis identifies a TEAD4-MYCN positive-feedback loop as the core regulatory element of high-risk neuroblastoma**

Presha Rajbhandari, Gonzalo Lopez, Claudia Capdevila, Beatrice Salvatori,Jiyang Yu, Ruth Rodriguez-Barrueco, Daniel Martinez, Mark Yarmarkovich, Nina Weichert-Leahey, Brian J. Abraham, Mariano J Alvarez, Archana Iyer, Jo Lynne Harenza, Derek Oldridge, Katleen De Preter, Jan Koster, Shahab Asgharzadeh, Robert C. Seeger, Jun S. Wei, Javed Khan, Jo Vandesompele, Pieter Mestdagh, Rogier Versteeg, A. Thomas Look, Richard A. Young, Antonio Iavarone, Anna Lasorella, Jose M Silva, John M Maris, Andrea Califano

**Table of contents**

Supplementary Experimental Procedures 4

Description of patient datasets 4

Computational and experimental approaches supporting information 4

Neuroblastoma gene expression profiles analysis 5

Clustering analysis of high risk primary tumor gene expression profiles 6

Differential expression analysis and null distributions for tumor subtypes 6

Assembly of the neuroblastoma specific transcriptional interactomes 6

Virtual Inference of Protein-activity by Enriched Regulon analysis (VIPER) 7

Identification of Master regulators of high risk neuroblastoma subtypes 8

Analysis of segmental DNA copy number frequencies 8

Cell lines and cell culture 9

Pooled shRNA screening 9

Individual shRNA screening 10

siRNA transfection 11

RNA isolation, RNA-seq and RT-PCR analyses 11

Immunoblot analysis 11

Chromatin immunoprecipitation assay 12

ChIP-seq analysis: ChIP-seq library preparation and analysis 12

ChIP-seq quality assessment and motif enrichment analysis 12

Tissue microarray analyses 13

Cell viability assays 14

Cell cycle, proliferation and apoptotic assay by Flow Cytometry 14

Colony forming assays 14

Gene set and pathway enrichment analysis 15

Pancancer correlation analysis of TEAD4 expression 15

Survival analysis 15

Supplementary References 15

Supplementary figures S1-S10 17

Figure S1. Identification and characterization of high-risk neuroblastoma subtypes. 18

Figure S2. Characterization of neuroblastoma subtypes. 20

Figure S3. Cross cohort subtypes and network similarities. 22

Figure S4. MYC/MYCN expression and activity in neuroblastoma cell lines. 23

Figure S5. Silencing efficiency of the MRs and morphological and molecular assays upon MYCN depletion in MYCNA cells. 24

Figure S6. Analysis of MR-regulatory module, TEAD4 chIP-Seq data, and RNA-Seq data upon depletion of TEAD4 and MYCN. 27

Figure S7. TEAD4 is required for tumorigenic potential of MYC/N overexpressing cells. 28

Figure S8. TEAD4 knockdown decreases cell growth without increased apoptosis. 29

Figure S9. TEAD4 shows no dependence on YAP1/TAZ cofactor activity in neuroblastoma cells. 31

Figure S10. TEAD4 expression is an independent survival biomarker. 32

Supplementary tables S1-S9 32

Table S1: Neuroblastoma Molecular subtypes and clinical information (Excel file). 32

Table S2: Differential expression and biological pathway enrichment analysis of neuroblastoma molecular subtypes (Excel file). 32

Table S3: ARACNe-AP transcriptional network from gene expression profiles (Excel file). 33

Table S4: Master Regulator Analysis results from msVIPER (Excel file). 33

Table S5: RNAi screening to identify MYCNA subtype specific MRs (Excel file). 33

Table S6: TEAD4 ChIP-seq results (Excel file). 34

Table S7: RNA-seq derived signatures and pathway analysis from shTEAD4, shMYCN ans shWWTR1 (Excel file). 34

Table S8. Tissue microarray clinical data and staining scores. 35

Table S9. Sequences of oligonucleotides used for qRT-PCR. 38

# Supplementary Experimental Procedures

## Description of patient datasets

The primary tumors of neuroblastoma patients were assembled by NCI TARGET consortium from patients enrolled in various Children's Oncology Group (COG) clinical trials. It included 646 samples, with clinical information, representing (a) 577 high-risk and (b) 65 low-risk tumors (Stage 1) based on International neuroblastoma staging system (INSS) (1) and COG risk classification. The dataset comprised both mRNA HumanExon 0.1ST profiles (n = 249, of which n = 219 from high-risk tumors) and Illumina SNPs profiles (Table S1).

The primary tumors of neuroblastoma patients assembled by NRC were used for validation studies. This cohort included samples representative of all tumor stages, with clinical annotation (Table S1), for which mRNA HumanExon 0.1ST profiles (n = 279) and CGH arrays (n = 219) were available. Total number of patients representing high-risk group was 97. A group of stage 1 tumors diagnosed before 12 months (n=30) were filtered to match the control group defined by TARGET consortium.

In addition, we incorporated the SEQC cohort dataset (GEO: GSE62564) comprising RNA-seq transcript level quantification for 498 neuroblastomas to complement our survival analysis as described below.

## Computational and experimental approaches supporting information

Step I: we independently analyzed the gene expression profiles from high-risk TARGET and NRC samples and categorized them into clinically and/or biologically distinct/relevant molecular subtypes. Step II: we analyzed gene expression profile data from each cohort to build TARGET- and NRC-specific neuroblastoma interactomes, using the Algorithm ARACNe-AP. To infer MR proteins of individual molecular subtypes, we generated TARGET- and NRC-specific differential expression signatures by comparing samples representing high-risk molecular subtypes to samples in the low-risk set (control). We then used the VIPER suite which incorporates an updated version of MARINa algorithm (msVIPER) to identify the MR proteins that causally regulate these signatures, based on their targets as represented in the cohort-matched interactome. Specifically, msVIPER prioritizes MR proteins based on the enrichment of their transcriptional targets (i.e., their interactome regulons) in genes differentially expressed in the gene expression signature of interest. Step III: we performed an identical MR analysis, using VIPER, which works at the single sample level, for each of a set of 25 neuroblastoma cell lines suitable for experimental validation. Cell lines were matched to specific subtypes based on overlap of MR proteins. Step IV: we tested the top ranked MRs through a molecular screen, using complementary approaches and RNAi reagents, to mitigate false discovery resulting from off-target effects and technology specific biases, including: (a) *in vitro* and *in vivo* pooled shRNA screens, (b) an individual shRNA and siRNA screen. Step V: we integrated the results from Step 4. Step VI: we experimentally tested the mutual regulatory activity of validated MR proteins to infer the connectivity of the hierarchical regulatory module they comprise. Finally, Step VII: we functionally characterized the regulatory feedback loop and mechanism responsible for maintaining the aberrant activity of the MR module characterized in Step VI as well as its biological relevance.

## Neuroblastoma gene expression profiles analysis

Primary tumor gene expression profiles were organized by the TARGET (Therapeutically Applicable Research to Generate Effective Treatments) consortium and the NRC (Neuroblastoma Research Council) consortium. Profiles were obtained in both datasets using Affymetrix arrays Human Exon 1.0ST platform. Gene expression intensities were normalized using Robust Multi-array. Average implemented in the Affymetrix Power Tools suite using the “rma-sketch” option over the core probe set annotation.

## Clustering analysis of high risk primary tumor gene expression profiles

We used ConsensusClusterPlus R Bioconductor package implementation of Consensus Clustering (2). This method provides quantitative evidences for determining the number and membership of possible clusters within a dataset, such as microarray gene expression. The algorithm implements several clustering algorithms and generates consensus for multiple resampling. First, we collected genes with higher coefficient of variation (CV > 0.1), which represent genes with greater sample variability in each dataset (#TARGET = 3401; #NRC=2853) and selected those genes that were present in both lists (#common=2435). Consensus clustering was based on hierarchical clustering algorithm implemented in R “hclust” function where "ward.D". This method was selected to segregate samples based on “Pearson” distance measure. Consensus clustering requires a predefined number of consensus clusters k; we ran the algorithm using k values 2 to 6. In order to identify the optimal number of clusters we studied the area under the cumulative distribution function as described in ConsensusClusterPlus ([http://bioconductor.org/packages/ConsensusClusterPlus/](https://bioconductor.org/packages/ConsensusClusterPlus/)) tutorial.

## Differential expression analysis and null distributions for tumor subtypes

In order to calculate differential expressed genes in high-risk tumor subtypes, we calculated two-sided Student's t-test comparisons for each high-risk subtype versus low-risk tumor GEPs as control. Additionally, we generated null models for each signature by sample permutation (i=1000) followed by t-test. These null models are required for the Master Regulator analysis, msVIPER algorithm, described below.

## Assembly of the neuroblastoma specific transcriptional interactomes

ARACNe-AP (Algorithm for the Reconstruction of Accurate Cellular Networks through Adaptive Partitioning) (3) was used to obtain transcriptional interactomes from TARGET and NRC gene expression profiles independently. This algorithm is an updated version of the widely used information theoretic ARACNe algorithm (4). ARACNe-AP allows reverse engineering of transcriptional networks (i.e. TF-target interactions) from large GEP datasets. Inference of TF-target interactions is inferred using the significance of mutual information between TF genes (1800 transcriptional regulators defined by Gene Ontology annotation) and candidate target genes where the p-value cutoff is established empirically. In order to remove indirect interactions, ARACNe-AP implements Data Process Inequality tolerance pruning system. ARACNe-AP software is freely available for academic purposes at <http://wiki.c2b2.columbia.edu/califanolab/index.php/Software>. We ran 100 bootstrapped networks by resampling 80% samples every time and integrated the resulting networks into a consensus network. The probability of every edge in the network was corrected using Bonferroni multiple testing correction method and only edges with p < 0.05 after correction were included in the final network.

## Virtual Inference of Protein-activity by Enriched Regulon analysis (VIPER)

VIPER algorithm (Alvarez et al, 2016) infers protein activity by systematically constructing and analyzing multiplexed gene reporter assays based on the protein’s transcriptional targets (regulon) as defined by ARACNe. The algorithm uses a probabilistic framework to account for target Mode of Regulation (i.e. activated versus repressed targets), statistical confidence of regulator-target interactions, and target overlap between different regulators (pleiotropy). For this, the method implements a fully probabilistic enrichment analysis framework, supporting weighted gene contribution. To ensure robustness and computational efficiency, the algorithm uses the mean of ranks as test statistic and thus this method is called analytic Rank-based Enrichment Analysis (aREA). This addresses two critical requirements: it allows seamless integration of activated, repressed, and undetermined targets (MoR) and it supports computationally efficient probabilistic weighting of individual genes (e.g., low versus high-likelihood targets). Thus, differential protein activity is quantitated by VIPER; as the normalized enrichment score (NES) computed by the aREA algorithm. aREA algorithm can be used in two different modes: (a) msVIPER establishes a rank from the most activated to the most repressed transcription factor provided a differential gene expression signature using an ARACNe regulon network type. This approach allows studying the most important regulators (Master regulators) involved in the transition between phenotypes. (b)VIPER algorithm implements aREA on a single sample level, provided a data matrix of samples are available and provides TF activity measure for each sample. Further description of this method and source code can be found as an R Bioconductor package (<https://bioconductor.org/packages/release/bioc/html/viper.html>).

## Identification of Master regulators of high risk neuroblastoma subtypes

msVIPER was used to interrogate the TARGET and NRC interactomes to obtain Master Regulators from each high-risk subtype differential expression signature in both TARGET and NRC datasets independently. The results from both dataset were driven independently and return empirical p-values; therefore we can integrate the results using the Fisher’s method for the integration of probabilities which states that . This approach returns an X2 statistic from which an analytical p-value can be obtained.

## Analysis of segmental DNA copy number frequencies

In order to study copy number frequencies across different high-risk subtypes, we studied copy number segmentation profiles from TARGET and NRC cohort samples overlapping with gene expression profiles. The TARGET consortium provides Illumina 550K SNP arrays for 153 overlapping samples from which 40 are Mesenchymal, 46 11q-LOH, 35 MYCNA, 24 Stage 1 and 8 unclassified. SNP arrays were initially analyzed as described previously (5) to obtain segmentation profiles corrected by aneuploidy and gene level copy number. The NRC consortium provided 219 overlapping CNV profiles derived from CGH arrays from which 20 are Mesenchymal, 39 11q-LOH, 26 MYCNA, 22 stage 1 and 112 profiles from unclassified or intermediate risk tumors. CGH arrays from the NRC cohort were analyzed as described previously (Kumps et al, 2013); Copy number estimations for the NRC cohort are provided as the overall gene level log2 ratios for each sample.

## Cell lines and cell culture

All neuroblastoma cell lines were obtained from the Children’s Hospital of Philadelphia cell line bank, the Children’s Oncology Group, or ATCC. They were maintained in DMEM or RPMI-1640 supplemented with 10% FBS, 20 mM L-glutamine and antibiotics. The genomic identity of each line was confirmed (2015) using the AmpFISTR Identifier kit (Applied Biosystems), and lines were routinely tested for the confirmed lack of mycoplasma contamination. 293FT cells were maintained in DMEM supplemented with 10% FBS and antibiotics. Treatment of BE2 cells with cycloheximide (100μg/ml) and MG-132 (20μM) were carried out as indicated. Cell lines were routinely tested to confirm the lack of mycoplasma contamination. We received the cell lines in 2012 and the experiments were performed between 2012 and 2017.

During routine testing, the NB16 lines was found to be the rhabdomyosarcoma cell line RD. None of the experiments presented in this manuscript used NB16 or RD cell lines, however some of the multi-sample genomic analyses presented here did include RD, and this is correctly label in the supplementary material.

## Pooled shRNA screening

Transduction efficiency in a panel of cell lines were tested using pLKO.1-puro-CMV-TurboGFP positive control lentiviral particles (SHC003V, Sigma). Lentiviral particles encoding Control shRNA (SHC002) or 4-5 hairpins against each MR (Sigma) were infected into BE2, IMR-5, SK-N-AS and NLF in the presence of 2-8ug/ml polybrene (6). For shRNA sequences, see Table S5 (sheets 2). The cells are transduced with unique shRNAs in a 96 well plate, followed by pooling of the cells and selection with 0.5ug/ml puromycin. For in-vitro screening, the cells were collected after puromycin selection (T0= 4 days) and (Tf= day 28). For in-vivo screening, input cells were collected (T0= 7 days) and 3 X 106 cells were implanted into nude mice and tumors were collected (Tf= 4 weeks) after implantation. Genomic DNA was isolated using Qiagen blood and cell culture DNA kit. To measure shRNA representation at each time points, shRNA cassettes were amplified from the genomic DNA using primers with Illumina adapters and barcode sequences. The samples were pooled together and the amplicons were sequenced using Illumina MiSeq® instrument. The raw sequencing data of shRNA screens was deconvoluted and normalized to count per million in each sample (7). Then, we analyzed the normalized shRNA abundance data by ScreenBEAM method (8) to identify essential genes, whose hairpins were depleted over time, in each cell line, with in vitro and in vivo being separated. To integrate gene-level dropout scores of multiple cell lines in one group, for example, MYC-amplified, we performed the meta-analysis using Stouffer’s z score method (9).

## Individual shRNA screening

Lentiviral particles encoding control shRNA (SHC002, SHC202) and 2 hairpins against each MR using pLKO.1-puro lentiviral constructs (Sigma) were produced as described previously (10). For shRNA sequences, see Table S5 (sheet 4). Transduction efficiency in a panel of cell lines were tested using pLKO.1-puro-CMV-TurboGFP positive control lentiviral particles (SHC003V, Sigma). The lentiviruses were concentrated using Amicon Ultra Centrifugal filter unit-100K (Millipore) for 40 min or ultracentrifugation at 25,000rpm in SW28 rotor for 1.5 hrs. (Beckman). Neuroblastoma cell lines were transduced with the viral particles in the presence of 2-8μg/ml polybrene. Transductions were performed with a mix of 2 hairpins per gene to control for off-target effects, unless otherwise stated. This protocol was also used for performing TAZ knockdown experiments.

## siRNA transfection

ON-TARGET plus siRNA smartpool against the MRs and non-targeting control (Dharmacon) were used to transfect the neuroblastoma cell lines at a concentration of 20nM, using Dharmafect reagent (Dharmacon), following manufacturer’s instructions. For siRNA sequences, see Table S5 (sheet 6).

## RNA isolation, RNA-seq and RT-PCR analyses

Total RNA was extracted using Direct-zol RNA Miniprep kit (Zymo Research). For RT-PCR, cDNA was prepared using qScript Flex cDNA Synthesis kit (Quanta Biosciences), and the amount of transcripts were quantified using Power SYBR Green master mix (Thermo Fisher Scientific), with the respective oligonucleotides (Table S10) in Applied Biosystems 7300 RT-PCR system. The number of copies of each gene was normalized to the housekeeping gene, GAPDH and/or HPRT1. For RNA-seq, the integrity of RNA was analyzed using Bioanalyzer (Agilent Technologies). RNA-seq libraries were made with Illumina TruSeq RNA Sample

Prep protocol by Columbia Genome Center and sequenced on Illumina NextSeq 500. All libraries have >30 milllion reads sequenced. The libraries were aligned to hg19 human genome using TopHat. Raw counts of each gene were generated using GenomicFeatures R-system package (Bioconductor). The data was then normalized using voom (11) and significantly differentially expressed genes were retrieved using limma R-system package (Bioconductor).

## Immunoblot analysis

For immunoblotting, whole-cell lysates were prepared by using RIPA buffer (Teknova) with protease inhibitor cocktail (Roche). Nuclear and cytoplasmic extraction was done using NE-PER nuclear and cytoplasmic extraction kit (Thermo Scientific), following manufacturer’s protocol. Proteins extracts were resolved by SDS–PAGE and analyzed by standard procedures using the following antibodies: TEAD4 (ab58310; abcam), MYCN (9405; Cell Signaling), MYC (D84C12 XP; Cell Signaling), GAPDH (sc-32233; Santa Cruz), AURKA (14475; Cell Signaling), CDK1 (9116; Cell Signaling), YAP/TAZ (8418; Cell Signaling), H2A.X (7631; Cell Signaling). Densitometry analyses were performed using ImageJ software.

## Chromatin immunoprecipitation assay

Promoter sequences of the target genes 2kb upstream and 2kb downstream of the transcription start site were retrieved using UCSC genome browser. We identified binding motifs using JASPAR (12). ChIP analysis was performed by using Magna ChIP™ A/G Chromatin Immunoprecipitation Kit, following manufacturer’s protocol. Antibodies used were anti-MYCN (ab16898, Abcam) or Mouse IgG. Binding of the TFs was determined by qPCR using the primers designed to contain the putative binding sites and negative control (71001, Active motif). For oligonucleotide sequences, see Table S10.

## ChIP-seq analysis: ChIP-seq library preparation and analysis

ChIP followed by massively parallel DNA sequencing (ChIP-seq) was performed as previously described (13, 14), by using anti-TEAD4 antibody (ab58310; abcam). Both input and TEAD4 ChIP-seq libraries were mapped to the hg19 version of the human reference genome using bowtie 1.1.1 (Langmead et al., Genome Biology, 2009) with parameters -k 2 -m 2 --best --sam and -l set to the read length.  Peaks were called using MACS (Zhang et al., Genome Biology, 2008) with corresponding input or IgG control, -p 1e-9 and --keep-dup=auto.  Genes were assigned to a single RefSeq gene whose transcription start site is nearest the center of the peak.

## ChIP-seq quality assessment and motif enrichment analysis

We used strand cross-correlation analysis (15) as a quality check of both the input and TEAD4 ChIP-assay on BE2 cells. According to this approach, high quality ChIP-seq experiment sequence tags at locations bound by the protein of interest were retrieved. The cross-correlation metric is computed as the Pearson's linear correlation between each strand, after shifting the + strand N base pairs. When plotted against sequence tag length, cross-correlation produces two peaks: one corresponding to the predominant fragment length and a peak corresponding to the read length (known as “phantom” peak). ChIP-seq libraries typically show stronger signal in the former peak as compared with the “phantom” peak while input and unsuccessful assays show a stronger “phantom” peak. This analysis is a good indicative of the signal to noise of this type of experiments.

We also evaluated the genometric similarity of our ChIP-seq experiment in BE2 cells compared to other TEAD4 ChIP-seq experiments available in the ENCODE resource. The R package GenometriCorr (16) implements several measures of correlation between two sets of genomic feature/segment coordinates such as narrowPeak ChIP-seq results. We represented two of this measures: Jaccard index A∩B/A∪B, where A is the set of segments of a query cell type while B is reference segments from our experiment (BE2-TEAD4 narrowPeaks); relative distance or Area under the Empirical Distribution Cumulative Function correlation which measures how close the segment centers of a query set compared to the closest segments of the reference set are.

In order to evaluate the enrichment of TEAD4 known binding motifs in our ChIP assay, we collected the curated annotations available in CIS-DB (17); we then used PWMenrich Bioconductor R package functions for the calculation of theoretic binding affinity scores (<https://www.bioconductor.org/packages/release/bioc/html/PWMEnrich.html>). This procedure was also applied to multiple TEAD4 ChIP-seq experiment results available through the ENCODE resource.

## Tissue microarray analyses

TEAD4 (ab58308; abcam) antibody was used to stain formalin fixed paraffin embedded tissue slides. Staining was performed on a Bond Max automated staining system (Leica Microsystems). The Bond Refine polymer staining kit (Leica Microsystems) was used. The standard protocol was followed with the exception of the primary antibody incubation, which was extended to 1 hour at room temperature. TEAD4 antibody was used at 1:1K dilution and antigen retrieval was performed with E1 (Leica Microsystems) retrieval solution for 20min. Slides were rinsed, dehydrated through a series of ascending concentrations of ethanol and xylene, then coverslipped. Stained slides were then digitally scanned at 20x magnification on an Aperio CS-O slide scanner (Aperio, Vista CA)

## Cell viability assays

Cell viability was measured by resazurin based assay, using Presto blue cell viability reagent (Thermo Fisher Scientific) or CellTiter-Glo (Promega) by following manufacturer’s protocol.

## Cell cycle, proliferation and apoptotic assay by Flow Cytometry

For cell cycle analysis, BE2 cells were fixed in 70% ice-cold ethanol and stained with propidium iodide (Sigma). Proliferation assay was performed by evaluation of EdU incorporation by using Click-It EdU Alexa Fluor 488 kit (Thermo Fisher Scientific) using manufacturer’s protocol. Similarly, apoptotic assay was performed using Annexin V staining kit (BD Pharmingen), according to manufacturer’s protocol. All analyses were performed on BD LSRII Cell Analyzer and FlowJo software (Tree Star).

## Colony forming assays

Soft agar colony forming assays were performed as described previously (18). In brief, 5000-10000 cells were seeded in Sea Plaque Low Melt Agarose (Lonza) in growth media for 3 weeks. Cells were then fixed, stained with crystal violet and imaged under dissecting microscope. The colonies were quantitated using ImageJ software.

## Gene set and pathway enrichment analysis

We used gene set enrichment analysis (GSEA) in order to calculate differentially active pathways and gene sets. Gene set collections where obtained from MSIG database (19). Different figures represent pathway collections derived from REACTOME, Gene Ontology and KEGG. Other gene sets signatures used include the immune and stroma infiltration from ESTIMATE method (20, 21).

## Pancancer correlation analysis of TEAD4 expression

We used the “cgdsr” R package (cBio Cancer Genomics Portal: URL: http://www.cbioportal.org/) in order to collect RNA gene level quantification from 39 datasets including 29 histologies each containing gene expression data for more than 20 samples (Supplementary Figure 7 I-K). We used single-sample GSEA to estimate the activity of MYC using the gene sets HALLMARK_MYC_TARGETS_V1 and HALLMARK_MYC_TARGETS_V2 obtained from MSigDB v5.2.

## Survival analysis

We used Cox regression to estimate the significance of association between continuous variables derived from gene expression and pathway activities and censored (survival) data. Results when represented as Kaplan-Meier curve plots, every curve represents a sliding window over the ranking of the quantitative variable in study.  All survival statistical analyses were performed using proportional hazards regression model implemented in the R “survival" package ([http://cran.r-project.org/web/packages/survival/index.html](http://cran.r-project.org/web/packages/survival/index.html" \t "_blank)).

# Supplementary References

1. Brodeur GM, Pritchard J, Berthold F, Carlsen NL, Castel V, Castelberry RP, et al. Revisions of the international criteria for neuroblastoma diagnosis, staging, and response to treatment. Journal of Clinical Oncology. 1993;11(8):1466-77.

2. Monti S, Tamayo P, Mesirov J, Golub T. Consensus Clustering: A Resampling-Based Method for Class Discovery and Visualization of Gene Expression Microarray Data. Machine Learning. 2003;52(1-2):91-118.

3. Lachmann A, Giorgi FM, Lopez G, Califano A. ARACNe-AP: gene network reverse engineering through adaptive partitioning inference of mutual information. Bioinformatics. 2016;32(14):2233-5.

4. Margolin AA, Nemenman I, Basso K, Wiggins C, Stolovitzky G, Dalla Favera R, et al. ARACNE: an algorithm for the reconstruction of gene regulatory networks in a mammalian cellular context. BMC bioinformatics. 2006;7 Suppl 1:S7.

5. Attiyeh EF, Diskin SJ, Attiyeh MA, Mosse YP, Hou C, Jackson EM, et al. Genomic copy number determination in cancer cells from single nucleotide polymorphism microarrays based on quantitative genotyping corrected for aneuploidy. Genome Res. 2009;19(2):276-83.

6. Silva JM, Marran K, Parker JS, Silva J, Golding M, Schlabach MR, et al. Profiling essential genes in human mammary cells by multiplex RNAi screening. Science. 2008;319(5863):617-20.

7. Yu J, Putcha P, Califano A, Silva JM. Pooled shRNA screenings: computational analysis. Methods in Molecular Biology (Clifton, NJ). 2013;980:371-84.

8. Yu J, Silva J, Califano A. ScreenBEAM: a Novel Meta-Analysis Algorithm for Functional Genomics Screens via Bayesian Hierarchical Modeling. Bioinformatics. 2015:btv556.

9. Stouffer SA, Suchman EA, DeVinney LC, Star SA, Williams RMJ. Adjustment During Army Life: Princeton University Press; 1949 1949.

10. Lefebvre C, Rajbhandari P, Alvarez MJ, Bandaru P, Lim WK, Sato M, et al. A human B-cell interactome identifies MYB and FOXM1 as master regulators of proliferation in germinal centers. Molecular Systems Biology. 2010;6:377.

11. Law CW, Chen Y, Shi W, Smyth GK. voom: precision weights unlock linear model analysis tools for RNA-seq read counts. Genome Biology. 2014;15(2):R29.

12. Sandelin A, Alkema W, Engstrom P, Wasserman WW, Lenhard B. JASPAR: an open-access database for eukaryotic transcription factor binding profiles. Nucleic Acids Res. 2004;32(Database issue):D91-4.

13. Oldridge DA, Wood AC, Weichert-Leahey N, Crimmins I, Sussman R, Winter C, et al. Genetic predisposition to neuroblastoma mediated by a LMO1 super-enhancer polymorphism. Nature. 2015;528(7582):418-21.

14. Lee TI, Johnstone SE, Young RA. Chromatin immunoprecipitation and microarray-based analysis of protein location. Nat Protoc. 2006;1(2):729-48.

15. Landt SG, Marinov GK, Kundaje A, Kheradpour P, Pauli F, Batzoglou S, et al. ChIP-seq guidelines and practices of the ENCODE and modENCODE consortia. Genome Res. 2012;22(9):1813-31.

16. Favorov A, Mularoni L, Cope LM, Medvedeva Y, Mironov AA, Makeev VJ, et al. Exploring massive, genome scale datasets with the GenometriCorr package. PLoS Comput Biol. 2012;8(5):e1002529.

17. Weirauch MT, Yang A, Albu M, Cote AG, Montenegro-Montero A, Drewe P, et al. Determination and inference of eukaryotic transcription factor sequence specificity. Cell. 2014;158(6):1431-43.

18. Franken NAP, Rodermond HM, Stap J, Haveman J, van Bree C. Clonogenic assay of cells in vitro. Nature Protocols. 2006;1(5):2315-9.

19. Subramanian A, Tamayo P, Mootha VK, Mukherjee S, Ebert BL, Gillette MA, et al. Gene set enrichment analysis: a knowledge-based approach for interpreting genome-wide expression profiles. Proceedings of the National Academy of Sciences of the United States of America. 2005;102(43):15545-50.

20. Yoshihara K, Shahmoradgoli M, Martínez E, Vegesna R, Kim H, Torres-Garcia W, et al. Inferring tumour purity and stromal and immune cell admixture from expression data. Nature Communications. 2013;4:2612.

21. Carter SL, Cibulskis K, Helman E, McKenna A, Shen H, Zack T, et al. Absolute quantification of somatic DNA alterations in human cancer. Nature Biotechnology. 2012;30(5):413-21.

# Supplementary figures S1-S10

### Figure S1. Identification and characterization of high-risk neuroblastoma subtypes.

Consensus clustering of high-risk neuroblastoma primary tumor GEPs: relative area changes on the cumulative distribution function of (A) TARGET and (D) NRC cohorts for consensus clustering runs on k = 2 to 6 clusters; representation of consensus clusters for the optimal separation (k=3) of (B) TARGET and (E) NRC high-risk cohorts and gene level hierarchical clustering of expression Z scores for highly variable genes filtered by inter-quantile ratio (IQR 4th quantile), comprising 4331 genes from (C) TARGET and (F) NRC high-risk cohort. (G, H) Frequencies of the most common segmental copy number alterations in high-risk neuroblastoma subtypes including loss of chr1p36 and chr11:q15-q25 and gains in chr17q derived from SNP genotyping arrays in (G) TARGET cohort and CGH-arrays in (H) NRC cohort. The average log2 ratio for genes mapping to each segment were obtained, with 0.9 (loss) and 1.1 (gain) used as cutoffs. (I-L) Co-segregation of histological variables assessed by relative frequency of (I) differentiation (J) mitosis-karyorrhexis index (MKI) (K) ganglio-neuroblastoma samples and (L) favorable and unfavorable histology. (M, N) Expression and activity of MYCN and MYC across subtypes in (M) TARGET and (N) NRC samples show negative Pearson’s correlation (showed in text in the upper left plot area) of MYCN versus MYC expression while MYC/N activity (Normalized Enrichment Score of MYCN signature (Valentijn, Koster et al. 2012) is increased in samples overexpression both MYCN and MYC. (O, P) Kaplan-Meier survival analysis across high-risk subtypes shows borderline separation in (O) TARGET dataset (logrank test, P=5.44e-2) and no separation in (P) NRC dataset (P=3.06e-1). Additional description of methods in Supplementary Experimental Procedures.

### Figure S2. Characterization of neuroblastoma subtypes.

(A-D) Analysis of stromal and immune infiltration in neuroblastoma samples. ESTIMATE algorithm (Yoshihara et al. 2013) was used to analyze the relative levels of tumor purity in neuroblastoma samples as a function of their expression of stroma specific and immune cells specific signatures. Relative purity assignment using ESTIMATE algorithm in (A) TARGET and (B) NRC dataset. Corresponding scores for immune and stromal infiltration and purity in (C) TARGET and (D) NRC samples. (E-H) Analysis of mesenchymal gene expression signature in patient samples and cell lines. Co-expression analysis of segregating signatures in patient tumor samples showing patterns of expression for cell cycle (KEGG), mesenchymal (Phillips, Kharbanda et al. 2006) and infiltrating signatures (immune and stroma) (Yoshihara et al. 2013) in (E) neuroblastoma patient samples and (F) neuroblastoma cell lines (G) Single cell line GSEA analysis representing NES of mesenchymal and KEGG cell cycle signatures in a panel of 25 neuroblastoma cell lines indicate negative correlation between mesenchymal and proliferative activities (H) GSEA plot showing enrichment of MES-GES (Phillips et al. 2006) in a cell line representing MES subtype, SK-N-AS. (I) Summary of activated and repressed biological programs in high-risk neuroblastoma subtypes. Single sample GSEA for gene sets defining proliferative (cell cycle (KEGG) and meta-PCNA (Venet et al. 2011), mesenchymal (Phillips et al. 2006), immune and stromal infiltration signature (Yoshihara et al. 2013) were performed in the GES of MYCNA, 11q-LOH, MES and Stage I patient samples. Red color denotes activation and blue denotes repression of the respective programs.

### Figure S3. Cross cohort subtypes and network similarities.

**(**A) Cross cohort network similarity contingency table and Venn diagram representing the overlap on the number of interactions inferred by ARACNe-AP, produced from TARGET and NRC GEPs, described in Table S3. The total number of putative interactions is estimated using the number of genes annotated as transcriptional regulator multiplied by all possible target genes included in the GEPs. (B) Multiple Fisher’s exact test results for the overlap of the top 500 differentially expressed genes, calculated for up-regulated (red) and down-regulated (blue) genes across subtypes in both TARGET and NRC datasets. (C, D) Multiple Fisher’s exact test results for the overlap of the (C) top 50 positive MRs and (D) the top 50 negative MRs in TARGET and NRC datasets.

### Figure S4. MYC/MYCN expression and activity in neuroblastoma cell lines.

(A) Single sample GSEA analysis of different MYC/N signatures. Pubmed ID is provided for those signatures derived from literature; signatures inferred by ARACNe are provided in Table S3. Expression Z-score for MYCN (B) and MYC (C) genes. (D) Scatter plot showing comparison between MYCN and MYC expression in neuroblastoma cell lines. MYCN/MYC activity represented by blue to red color scale based average NES derived from (A). (E) VIPER activity (Alvarez et al., 2013, bioconductor package) of the top 25 MRs of MYCNA subtype computed in a panel of 28 neuroblastoma cell lines. Overall activity is represented as the enrichment P value (left column) and ranked positions of the top 25 MRs in each cell line (center). MYCN activity from average signature as described in (A) and MYCN amplification status occupy the columns on the right. (F) Lentiviral transduction efficiency in a panel of MYCN-amplified and non-amplified cell lines using lentiviral particles expressing TurboGFP. (+) denotes cell lines with high (>98%) transduction efficiency and (-) denotes cell lines with low (<50%) transduction efficiency.

### Figure S5. Silencing efficiency of the MRs and morphological and molecular assays upon MYCN depletion in MYCNA cells.

(A) qRT-PCR analyses showing relative mRNA level of the MRs upon lentiviral shRNA mediated knockdown of the respective genes. Error bars represent s.d (B, C) Effect on cell viability and cell morphology upon MYCN knockdown (B) Relative cell viability and (C) microscopy images showing morphological changes of BE2 cells transduced with MYCN shRNA compared to control shRNA, measured 7 days post-transduction. (D) qRT-PCR analyses showing relative mRNA level of the MRs upon siRNA mediated knockdown of the respective genes. Error bars represent s.d (E) Immunoblot showing downregulation of TEAD4 protein upon knockdown of MYCN in BE2 cells in a time course experiment. (F) ChIP assay was performed with control IgG or MYCN specific antibody in BE2 cells. A region between 2 kb upstream and downstream the transcription start site of the target genes were analyzed for the presence of E-boxes using JASPAR (Zhao et al., 2013). Error bars represent s.e.m.

### Figure S6. Analysis of MR-regulatory module, TEAD4 chIP-Seq data, and RNA-Seq data upon depletion of TEAD4 and MYCN.

(A) qRT-PCR analysis showing the relative mRNA level of the eleven putative MRs identified from the RNAi screen, upon silencing of every other MR in BE2 cells **(**B, C) TEAD4 ChiP-Seq Phantom peak quality assessment analysis. Cross-correlation analysis of (B) Input and (C) TEAD4 ChiP-Seq libraries in BE2 cells. Blue dashed line represents the phantom peak associated with the read length while red dashed line indicates the summit for the ChIP peak associated with the average fragment length of the library. (D-F) Motif enrichment and genometrix similarity across multiple anti-TEAD4 ChiP-Seq experiments. Sequence-logo diagram of position weighted matrices describing alternative TEAD4 DNA binding motifs from CIS-DB (Weirauch, Yang et al. 2014). (D) Enrichment analysis of the two alternative TEAD4 DNA binding motifs measured as affinity raw score (PWMenrich bioconductor package). (E) Jaccard index and (F) relative distance measures of genometric correlation between BE2 ChiP-Seq narrow peak coordinates and multiple narrow peak coordinates from ENCODE TEAD4 ChiP-Seq experiments calculated with GeometricCorr Package (Favorov, Mularoni et al. 2012) show SKNSH standing out as the closest pair. (G) Immunoblot confirming knockdown of TEAD4 and MYCN in replicate samples of BE2 transduced with control, TEAD4 or MYCN shRNA, 48hrs post-transduction. The corresponding samples were used for RNA-Seq experiments. (H, I) GSEA analysis of differentially expressed genes after (H) TEAD4 knock-down and (I) MYCN knock-down in the signature of MYCNA versus Stage 1 tumors; P values derived from the integration of both up-regulated and down-regulated NES integration using Stouffer’s method. (J) Overlap between differentially expressed genes after TEAD4 knock-down and peak targeted genes from TEAD4-Ab ChiP-Seq. Red circle represent positive TEAD4 targets genes (down-regulated upon knock-down) while blue circle represents negative targets (up-regulated after knock-down). Fisher’s Exact Test was used to calculate the statistical significance of both overlaps using a background of 18.179 genes included in the RNA-Seq signature. (K-N) ARACNe inferred regulon overlap and size for TEAD4 and MYCN. ARACNe inferred interactions by mutual Information are not directional, therefore we present them divided in positive and negative according to the sign of Spearman’s correlation between each TF and target. Venn diagram shows the overlap across cohorts of positive and negative targets of (K) MYCN and (L) TEAD4. (M) GSEA analysis of NBi overlapping predicted positive and negative targets of MYCN in the shMYCN RNA-seq signature. (N) GSEA analysis of ARACNe overlapping predicted positive targets of TEAD4 in the shTEAD4 RNA-seq signature.

### Figure S7. TEAD4 is required for tumorigenic potential of MYC/N overexpressing cells.

(A) GSEA plot evaluating enrichment for genes involved in response to replication stress upon shTEAD4 signature; asterisk indicate TEAD4 peaks were found overlapping (red) or in the proximities (yellow) of the gene (B, C) Immunoblot showing protein levels of TEAD4, CHEK1 and ᵧ-H2AX in (B) BE2 and (C) LAN-1 cells transduced with control or two different TEAD4 shRNAs in a time course experiment. (D) Immunoblot analysis of TEAD4, MYCN, CDK1 and AURKA proteins in LAN-1 cells transduced with control or two different TEAD4 shRNAs in a time course experiment (E) qPCR analysis showing MYCN and AURKA transcript level at 48hrs post-transduction. Samples were run in triplicate and error bars represent s.e.m. (F) Immunoblot analysis of TEAD4, MYC, CDK1 and AURKA proteins and mRNA in SY-5Y cells transduced with Control or two different TEAD4 shRNAs in a time course experiment (G) qPCR analysis showing the transcript level of the corresponding genes at 48hrs post-transduction. Samples were run in triplicate and error bars represent s.e.m (H) Analysis of TEAD4 expression and activity in MYC and MYCN overexpressed tumors from NRC cohort. Scatter plot representing MYCN and MYC expression in x and y axis respectively. Samples are separated into MYCN-amplified and non-amplified groups. Single sample activity of TEAD4, represented as normalized enrichment score (NES). (I-K) Pearson’s correlation of TEAD4 expression with (I) MYC hallmark activity, (J) MYCN expression and (K) MYC expression across multiple tumor histologies obtained from the cBioPortal (<http://www.cbioportal.org/>).

### Figure S8. TEAD4 knockdown decreases cell growth without increased apoptosis.

(A) Immunoblot showing expression of TEAD4, MYCN and MYC in neuroblastoma cell lines. (B, C) Knockdown of TEAD4 does not induce apoptosis in MYCNA cell line. (B) Apoptosis analysis by Annexin-V staining upon transduction of BE2 cells with Control or TEAD4 shRNA, 3 days post-transduction. (C) Immunoblot analysis of PARP cleavage upon transduction of BE2 cells with control or two different hairpins against TEAD4.

### Figure S9. TEAD4 shows no dependence on YAP1/TAZ cofactor activity in neuroblastoma cells.

(A) Pearson’s correlation analysis in TARGET (left) and NRC (right) cohorts between TEAD4 activity and YAP1/TAZ signatures activity; oncogenic UP/DN signature (up) and REACTOME YAP/TAZ signature (down); Black dots represent MYCN amplified tumors. (B) Immunoblot analysis of nuclear and cytoplasmic localization of TEAD4, YAP and TAZ in MYCN-amplified and non-amplified cell lines (N: nuclear fraction; C: cytoplasmic fraction). (C) shRNA based TAZ knock-down Immunoblot analysis of TAZ, TEAD4 and MYCN in BE2 cells. (D) Volcano plot showing differentially expressed genes after TAZ knockdown by shRNA. (E) Volcano plot showing differentially expressed genes after TEAD4 knockdown by shRNA. (F) Venn diagram showing the overlap between differentially expressed genes after TAZ and TEAD4 knock downs. (G) GSEA analysis of ARACNe cross-cohort overlapping targets of TEAD4 across the shRNA knock-down TAZ RNA-seq signature. (H, I) Relative cell viability of (H) BE2 cells and (I) LAN1 cells upon transduction with control, TEAD4 or TAZ shRNA in a time course experiment.

### Figure S10. TEAD4 expression is an independent survival biomarker.

(A, B) Kaplan-Meier curve depicting corresponding increase in poor outcome with increasing expression of TEAD4. P-value was calculated using a cox proportional hazards model after removing stage I patient samples in (A) NRC and (B) SEQC cohorts. (C) TEAD4 multivariate cox proportional hazards regression analysis with clinical covariates. (D) TEAD4 multivariate cox proportional hazards regression analysis using MYCN based signature and a PCNA-based proliferative signature.

# Supplementary tables S1-S9

### Table S1: Neuroblastoma Molecular subtypes and clinical information (Excel file).

This file contains the resulting sample groups derived from consensus clustering classified into subtypes and associated clinical information. (1) TARGET cohort subtypes; (2) NRC cohort subtypes; Column 1 indicates the sample id, column 2 subtype name, column 3 MYCN amplification status, column 4 INSS stage and column.

### Table S2: Differential expression and biological pathway enrichment analysis of neuroblastoma molecular subtypes (Excel file).

(1) Genome wide differential expression analysis using Limma Bioconductor R package of (B-E) Mesenchymal versus Stage 1, (F-I) 11q-LOH versus Stage 1 and (J-M) MYCN samples versus Stage 1. (2) REACTOME pathway collection enrichment analysis, (3) KEGG pathway collection enrichment analysis, (4) Gene Ontology biological process collection enrichment analysis. Every pathway analysis includes (A) the pathway names and the TARGET and NRC integrated Normalized Enrichment Scores by Stouffer’s method, integrated p-value by Fisher’s method, false discovery rate correction of the integrated p-value, base 10 logarithm of integrated p-value multiplied by the sign the Normalized enrichment score for (B-E) Mesenchymal subtype, (F-I) 11q-LOH subtype and (J-M) MYCNA subtype.

### Table S3: ARACNe-AP transcriptional network from gene expression profiles (Excel file).

This file contains two adjacency matrices for TARGET and NRC respectively, representing the edges between transcriptional regulators (TF) and target genes. First column indicates the Hugo Gene Nomenclature Committee (HGNC) gene symbol of each transcriptional target in the network. Subsequent pairs of columns contain the HGNC gene symbol of each target and the mutual information value between the expression of both TF gene and target gene. Only pairs which mutual information P-value < 1e-8 are included in the network.

### Table S4: Master Regulator Analysis results from msVIPER (Excel file).

Every row indicates a transcriptional regulator and its differential activity between (1) Mesenchymal, (2) 11q-LOH and (3) MYCNA subtypes and Stage 1. Columns contain (A) HGNC gene symbol, (B) normalized enrichment score in TARGET cohort, (C) enrichment P-value in TARGET cohort, (D) normalized enrichment score in NRC cohort, (E) enrichment P-value in NRC cohort, (F) integrated normalized enrichment score from TARGET and NRC cohorts by Stouffer’s method and (G) integrated P-value by Fisher’s method.

### Table S5: RNAi screening to identify MYCNA subtype specific MRs (Excel file).

(sheet 1, 2)Pooled in-vivo and in-vitro shRNA screening was performed on MYCN-amplified and non-amplified cell lines. Integrated z-score and fold change of shRNA dropout for each gene was derived for each cell line from individual shRNAs and the values for MYCN-amplified cell lines versus non-amplified cell lines were further integrated. Log2Fold change of MYCN amp cell lines versus MYCN non-amp cell lines are derived for both in-vivo and in-vitro shRNA screening. (sheet 3, 4) Individual shRNA screening;A panel of MYCN-amplified and non-amplified cell lines were transduced and cell viability was measured 72 to 96hrs post-transduction. The experiment was done in triplicate and relative viability was measured relative to control shRNA. Relative cell viability for MYCN-amplified versus non-amplified cells was derived by taking average effect of 2 hairpins across the cell lines for each group Data is representative of three independent experiments. Data shown as average and s.d of three replicates. (sheet 5, 6) Individual siRNA screening. A panel of MYCN-amplified and non-amplified cell lines were transduced with ON-Target smartpool siRNA and cell viability was measured 96hrs post-transfection by Presto Blue reagent. The experiment was done in triplicate and relative viability was measured relative to control siRNA. Relative cell viability for MYCN-amplified versus non-amplified cells was derived by taking average effect of siRNAs across the cell lines for each group. Data is representative of two independent experiments. Data shown as average and s.d of three replicates.

### Table S6: TEAD4 ChIP-seq results (Excel file).

(sheet 1) Peak calls obtained from anti-TEAD4 ChIP-seq library in BE2 cells as described in supplementary experimental procedures. (1) Peak calls output from MACS2 suit indicating (A) peak region MACS2 unique identifier, (B) chromosome name, (C) genomic start position, (D) genomic stop position, (E) RefSeq transcript names (if any) which loci overlap with peak region coordinates, (F) proximal RefSeq transcript (if any) to the peak region coordinates, (G) closest RefSeq genes to each peak region coordinates, (H) gene symbol name of the closest gene to each peak region coordinates. (sheet 2) The list of 125 genes obtained from the intersection of up-regulated genes in MYCNA signature, activated genes by TEAD4 derived from shTEAD4 treatment followed RNAseq profiling and anti-TEAD4 ChIP-seq results. REACTOME (sheet 3) REACTOME pathway enrichment analysis, (sheet 4) KEGG pathway enrichment analysis and (sheet 5) Gene Ontology biological process enrichment analysis for the 125 gene set using Fisher’s exact test represented as (A) pathway name, (B) false discovery rate corrected p-value, (C) p-value, (D) odds ratio and (E-H) contingency matrix values.

### Table S7: RNA-seq derived signatures and pathway analysis from shTEAD4, shMYCN ans shWWTR1 (Excel file).

(1) Differential expression analysis obtained after voom normalization of RNA-seq count data using limma bioconductor R package for the comparison between (B-D) shTEAD4 treated BE2 cells and (E-G) shMYCN treated BE2 cells, compared to controls. (2) REACTOME pathway collection enrichment analysis, (3) KEGG pathway collection enrichment analysis, (4) Gene Ontology biological process collection enrichment analysis. Every pathway analysis includes (A) the pathway names and the GSEA enrichment results represented as Normalized Enrichment Scores, p-value, false discovery rate corrected p-value and base 10 logarithm of p-value multiplied by the sign the Normalized enrichment Score for (B-E) the shTEAD4 and (F-I) shMYCN differential expression profiles. (4) Differential expression analysis obtained after voom normalization of RNA-seq count data using limma bioconductor R package for the comparison between shWWTR1 treated BE2 cells compared to controls.

### Table S8. Tissue microarray clinical data and staining scores.

| **UPN (array)** | **Patient** | **AGE Dx (days)** | **INSS STAGE** | **MYCN_AMP (FISH)** | **MYCN_AMP (ISH)** | **MYCN_AMP (FINAL)** | **INSS RISK** | **TEAD4 core1 % positive** | **Intensity** | **Final score** | **TEAD4 core 2 % positive** | **intensity** | **Final score** | **Average final score** |
| --- | --- | --- | --- | --- | --- | --- | --- | --- | --- | --- | --- | --- | --- | --- |
| 3 | 1 | 83 | 3 | NO | NO | NO | I | **x** |  | n.a. | **80** | 1.5 | 120 | 120 |
| 6 | 3 | 1747 | 2B | NO | NO | NO | L | **0** |  | 0 | **5** | 1 | 5 | 2.5 |
| 7 | 4 | 154 | 1 | NO | NO | NO | L | **90** | 1 | 90 | **80** | 1 | 80 | 85 |
| 8 | 5 | 185 | 1 |  | NO | NO | L | **90** | 1.5 | 135 | **x** |  | n.a. | n.a. |
| 9 | 6A | 804 | 2 | NO | NO | NO | L | **80** | 1 | 80 | **X** |  | n.a. | n.a. |
| 13 | 9 | 358 | 1 | NO | NO | NO | L | **90** | 2 | 180 | **95** | 2 | 190 | 185 |
| 14 | 10 | 1389 | 2A | NO | NO | NO | L | **70** | 1 | 70 | **90** | 2 | 180 | 125 |
| 15 | 11 | 276 | 1 | NO | NO | NO | L | **60** | 1 | 60 | **90** | 1 | 90 | 75 |
| 17 | 13 | 195 | 3 | YES | NO | YES | H | **80** | 2 | 160 | **x** |  |  | 160 |
| 18 | 14 | 4614 | 4 | NO | NO | NO | H | **90** | 2 | 180 | **80** | 2 | 160 | 170 |
| 21 | 17 | 383 | 2B | YES | YES | YES | H | **90** | 1.5 | 135 | **90** | 1 | 90 | 112.5 |
| 22 | 18 | 55 | 2 | NO | NO | NO | L | **70** | 1 | 70 | **40** | 1 | 40 | 55 |
| 23 | 19 | 2015 | 2 |  | NO | NO | L | **60** | 1 | 60 | **50** | 1 | 50 | 55 |
| 29 |  |  |  |  |  |  |  | **30** | 1 | 30 | **40** | 1 | 40 | 35 |
| 30 | 21 | 532 | 2B | NO | NO | NO | L | **30** | 1 | 30 | **10** | 1 | 10 | 20 |
| 31 | 22 | 124 | 3 | NO | NO | NO | I | **90** | 1 | 90 | **80** | 1 | 80 | 85 |
| 36 | 23 | 1337 |  |  | NO | NO |  | **80** | 1 | 80 | **x** |  | n.a. | n.a. |
| 38 | 24A | 5289 |  |  | NO | NO | H | **50** | 1 | 50 | **50** | 1 | 50 | 50 |
| 40 | 24B | 36382 | 4 |  | NO | NO | H | **x** |  |  | **50** | 1 | 50 | 50 |
| 41 | 25 | 573 | 2B |  |  |  | L | **90** | 1 | 90 | **80** | 1 | 80 | 85 |
| 46 | 27 | 23 | 2A |  | NO | NO | L | **80** | 1.5 | 120 | **50** | 1 | 50 | 85 |
| 48 | 28 | 448 | 4 | YES | YES | YES | H | **60** | 1 | 60 | **80** | 1 | 80 | 70 |
| 53 | 31 | 56 | 1 |  | NO | NO | L | **50** | 1 | 50 | **50** | 1 | 50 | 50 |
| 59 | 32 | 393 | 1 | NO | NO | NO | L | **20** | 1 | 20 | **5** | 1 | 5 | 12.5 |
| 61 | 33 | 2709 |  |  | NO | NO |  | **15** | 1 | 15 | **x** |  | n.a. | n.a. |
| 63 | 34 | 2121 | 4 | NO | NO | NO | H | **25** | 1 | 25 | **50** | 1 | 50 | 37.5 |
| 74 | 38 | 867 | 4 | NO | NO | NO | H | **70** | 1 | 70 | **20** | 2 | 40 | 55 |
| 81 | 41 | 701 | 4 |  | YES | YES | H | **90** | 1.5 | 135 | **90** | 1.5 | 135 | 135 |
| 84 | 43A | 2171 |  |  | NO | NO |  | **30** | 1 | 30 | **30** | 1 | 30 | 30 |
| 84 | 43A | 2171 |  |  | NO | NO |  | **80** | 1 | 80 | **80** | 1 | 80 | 80 |
| 91 | 45 | 229 | 2B | NO | NO | NO | L | **90** | 1 | 90 | **x** |  | n.a. | n.a. |
| 93 | 46 | 2203 | 1 |  | NO | NO | L | **60** | 1 | 60 | **60** | 1 | 60 | 60 |
| 94 | 47 | 432 |  |  | YES | YES |  | **70** | 2 | 140 | **x** |  | n.a. | n.a. |
| 99 | 49 | 422 | 2 |  | NO | NO | L | **20** | 1 | 20 | **X** |  | n.a. | n.a. |
| 101 | 51 | 1530 | 4 | NO | NO | NO | H | **0** |  | 0 | **0** |  | 0 | 0 |
| 103 | 52 | 5 | 2A | NO | NO | NO | L | **90** | 1 | 90 | **95** | 1 | 95 | 92.5 |
| 107 | 56 | 6432 | 3 |  | NO | NO | H | **90** | 1.5 | 135 | **5** | 1 | 5 | 70 |
| 108 | 57 | 0 |  |  | NO | NO |  | **5** | 1 | 5 | **20** | 1 | 20 | 12.5 |
| 109 | 58 | 165 | 2A |  | NO | NO | L | **5** |  | 0 | **0** |  | 0 | 0 |
| 117 | 63A | 3197 | 2 |  | NO | NO | L | **50** | 1 | 50 | **x** |  | n.a. | n.a. |
| 118 | 64 | 416 | 4 | NO | NO | NO | H | **70** | 1 | 70 | **80** | 1 | 80 | 75 |
| 119 | 65 | 434 | 3 | NO | NO | NO | I | **70** | 1 | 70 | **90** | 1.5 | 135 | 102.5 |
| 120 | 66 | 401 | 4 | NO | NO | NO | H | **50** | 1.5 | 75 | **50** | 1.5 | 75 | 75 |
| 121 | 67A | 1936 | 1 | NO | NO | NO | L | **70** | 1 | 70 | **50** | 1 | 50 | 60 |
| 123 | 68 | 709 | 2B | NO | NO | NO | L | **60** | 1 | 60 | **70** | 1 | 70 | 65 |
| 125 | 69 | 1388 |  |  | NO | NO |  | **x** |  |  | **60** | 1 | 60 | 60 |
| 127 | 70 | 303 | 2B |  | NO | NO | L | **50** | 1.5 | 75 | **50** | 1 | 50 | 62.5 |
| 127 |  |  |  |  |  |  |  | **60** | 1 | 60 | **x** |  | n.a. | n.a. |
| 129 | 72A | 10 | 4 | YES | YES | YES | H | **x** |  |  | **90** | 2.5 | 225 | 225 |
| 131 | 73 | 1467 |  |  | NO | NO |  | **30** | 1 | 30 | **5** | 1 | 5 | 17.5 |
| 132 | 74A | 707 | 2B |  | NO | NO |  | **70** | 1 | 70 | **X** |  | n.a. | n.a. |
| 133 | 75 | 3624 | 4 |  | NO | NO | H | **40** | 1 | 40 | **60** | 1 | 60 | 50 |
| 138 | 77 | 276 | 2B | NO | NO | NO | L | **x** |  |  | **90** | 1 | 90 | 90 |
| 142 | 80 | 195 | 3 | NO | NO | NO | I | **20** | 2 | 40 | **x** |  |  | 40 |
| 143 | 81 | 2313 | 1 |  | NO | NO | L | **20** | 1 | 20 | **20** | 1 | 20 | 20 |
| 145 | 82 | 219 | 1 | NO | NO | NO | L | **80** | 2 | 160 | **x** |  | n.a. | n.a. |
| 149 | 84 | 735 | 1 | NO | NO | NO | L | **90** | 1 | 90 | **90** | 1 | 90 | 90 |
| 150 |  |  |  |  |  |  |  | **70** | 1 | 70 | **60** | 1 | 60 | 65 |
| 153 | 86 | 3871 | 3 | NO | NO | NO | H | **95** | 1 | 95 | **90** | 1 | 90 | 92.5 |
| 166 | 90 | 1195 | 4 |  | YES | YES | H | **x** |  |  | **70** | 2 | 140 | 140 |
| 169 | 91 | 4233 |  |  | NO | NO |  | **80** | 1 | 80 | **80** | 1 | 80 | 80 |
| 170 | 92 | 342 | 1 | NO | NO | NO | L | **70** | 1 | 70 | **70** | 1 | 70 | 70 |
| 171 | 93 | 3888 | 4 | NO | NO | NO | H | **80** | 2 | 160 | **40** | 3 | 120 | 140 |
| 180 | 96 | 358 | 1 | NO | NO | NO | L | **0** |  | 0 | **0** |  | 0 | 0 |
| 185 | 99B | 101 | 4 | NO | NO | NO | I | **70** | 1.5 | 105 | **X** |  | n.a. | n.a. |
| 187 | 100 | 1155 |  |  | NO | NO |  | **50** | 1 | 50 | **50** | 1 | 50 | 50 |
| 190 | 101 | 1846 | 1 |  | NO | NO | L | **30** | 1 | 30 | **x** |  | n.a. | n.a. |
| 192 | 103A | 618 | 3 | NO | NO | NO | H | **80** | 1 | 80 | **90** | 1 | 90 | 85 |
| 192 | 103A | 618 | 3 | NO | NO | NO | H | **50** | 1 | 50 | **30** | 1 | 30 | 40 |
| 195 | 104A | 485 | 1 |  | NO | NO | L | **80** | 1.5 | 120 | **80** | 2 | 160 | 140 |
| 195 | 104B | 485 | 1 |  |  |  | L | **40** | 2 | 80 | **80** | 1 | 80 | 80 |
| 197 | 105 | 52 | 1 |  | NO | NO | L | **15** | 1 | 15 | **15** | 1 | 15 | 15 |
| 201 | 106 | 1559 | 2A |  | NO | NO | L | **x** |  |  | **80** | 1 | 80 | 80 |
| 209 | 110A | 488 | 1 | NO | NO | NO | L | **60** | 1 | 60 | **40** | 1 | 40 | 50 |
| 209 | 110B | 488 | 1 | NO | NO | NO | L | **x** |  |  | **50** | 1 | 50 | 50 |
| 212 | 112 | 663 | 3 | NO | NO | NO | I | **x** |  | n.a. | **70** | 1.5 | 105 | n.a. |
| 214 | 114 | 61 | 3 | NO | NO | NO | I | **0** |  | 0 | **0** |  | 0 | 0 |
| 215 | 115 | 330 | 4 | NO | NO | NO | I | **90** | 1 | 90 | **90** | 1 | 90 | 90 |
| 221 | 116B | 1082 | 4 |  | YES | YES | H | **90** | 2.5 | 225 | **90** | 2 | 180 | 202.5 |
| 224 | 118 | 26 | 1 | NO | NO | NO | L | **95** | 1 | 95 | **100** | 1 | 100 | 97.5 |
| 225 | 119 | 617 | 4 |  | NO | NO | H | **0** |  | 0 | **20** | 1 | 20 | 10 |
| 229 | 121 | 1269 | 4 | NO | NO | NO | H | **X** |  |  | **20** | 1 | 20 | 20 |
| 233 | 123A | 721 | 1 | NO | NO | NO | L | **10** | 1 | 10 | **50** | 1 | 50 | 30 |
| 233 | 123A | 721 | 1 | NO | NO | NO | L | **30** | 1 | 30 | **25** | 1 | 25 | 27.5 |
| 235 | 125 | 546 | 4 | NO | NO | NO | H | **60** | 1 | 60 | **70** | 1 | 70 | 65 |
| 238 | 128 | 406 | 2 | YES | NO | YES | H | **90** | 2 | 180 | **80** | 2 | 160 | 170 |
| 241 | 129 | 75 | 1 | NO | NO | NO | L | **?** |  |  | **80** | 1 | 80 | 80 |
| 242 | 130A | 2860 | 2 |  | NO | NO | L | **50** | 1 | 50 | **25** | 1 | 25 | 37.5 |
| 244 | 131 | 5229 | 3 |  | NO | NO |  | **60** | 1 | 60 | **50** | 1 | 50 | 55 |
| 245 | 132 | 173 | 4 | NO | NO | NO | I | **80** | 1.5 | 120 | **80** | 1 | 80 | 100 |
| 247 | 133 | 611 | 1 |  | NO | NO | L | **100** | 1 | 100 | **100** | 1 | 100 | 100 |
| 250 | 134A | 2542 |  |  | NO | NO |  | **5** | 1 | 5 | **x** |  | n.a. | n.a. |
| 251 | 135 | 3357 | 2 |  | NO | NO | L | **20** | 1 | 20 | **20** | 1 | 20 | 20 |
| 252 | 136 | 2362 | 2 | NO | NO | NO | L | **50** | 1 | 50 | **x** |  | n.a. | n.a. |
| 253 | 137 | 916 | 2 |  | NO | NO | L | **50** | 1.5 | 75 | **70** | 1.5 | 105 | 90 |
| 256 | 139 |  | 1 |  | NO | NO | L | **25** | 1 | 25 | **60** | 1 | 60 | 42.5 |
| 262 | 141 | 325 | 1 | NO | NO | NO | L | **5** |  | 0 | **0** |  | 0 | 0 |
| 267 | 142 | 40 | 2 |  | NO | NO | L | **90** | 1.5 | 135 | **80** | 2 | 160 | 147.5 |
| 268 | 143 | 457 | 4 | YES | YES | YES | H | **x** |  |  | **20** | 2 | 40 | 40 |
| 269 | 144 | 1654 | 3 | NO | NO | NO |  | **15** | 1 | 15 | **x** |  | n.a. | n.a. |
| 272 | 146 | 699 | 2B | NO | NO | NO | L | **10** | 1.5 | 15 | **15** | 2 | 30 | 22.5 |
| 273 | 147 | 64 | 2B | NO | NO | NO | L | **90** | 1 | 90 | **90** | 1 | 90 | 90 |
| 276 | 149 | 542 | 1 | NO | NO | NO | L | **80** | 1.5 | 120 | **80** | 3 | 240 | 180 |
| 277 | 150 | 13 | 1 | NO | NO | NO | L | **90** | 1 | 90 | **90** | 1 | 90 | 90 |
| 278 | 151 | 328 | 2B | NO | NO | NO | L | **30** | 1 | 30 | **30** | 1 | 30 | 30 |
| 279 | 152 | 4669 |  |  | NO | NO |  | **20** | 1 | 20 | **50** | 1 | 50 | 35 |
| 288 | 154 | 1064 | 3 | NO | NO | NO | H | **90** | 1 | 90 | **80** | 1 | 80 | 85 |
| 289 | 155 | 406 | 4 | NO | NO | NO | H | **x** |  |  | **90** | 1 | 90 | 90 |
| 290 | 156 | 1680 | 2B | NO | NO | NO | L | **50** | 1 | 50 | **70** | 1.5 | 105 | 77.5 |
| 292 | 157 | 553 | 1 | NO | NO | NO | L | **60** | 1 | 60 | **80** | 1 | 80 | 70 |
| 295 | 159 | 2172 |  | NO | NO | NO |  | **60** | 1 | 60 | **20** | 1 | 20 | 40 |
| 299 | 162A | 32 | 3 | NO | NO | NO | I | **25** | 1 | 25 | **25** | 1 | 25 | 25 |
| 299 | 162B | 32 | 3 | NO | NO | NO | I | **40** | 1.5 | 60 | **60** | 1 | 60 | 60 |
| 303 | 163 | 4015 |  |  | NO | NO |  | **10** | 1 | 10 | **20** | 1 | 20 | 15 |
| 304 | 164 | 681 | 1 | NO | NO | NO | L | **95** | 1 | 95 | **90** | 1 | 90 | 92.5 |
| 305 | 165 | 97 | 2B | NO | NO | NO | L | **50** | 1 | 50 | **x** |  | n.a. | n.a. |

### Table S9. Sequences of oligonucleotides used for qRT-PCR.

Oligonucleotides used for qRT-PCR to measure the transcript level of individual genes in knockdown experiments or enrichment for TF binding to its target promoter for the MYCN-chIP assays.

| **HGNC gene** | **Sequence (5'-3') - Sense** | **Sequence (5'-3') - Antisense** |
| --- | --- | --- |
| AURKA | TTCAGGACCTGTTAAGGCTACA | ATTTGAAGGACACAAGACCCG |
| CDK1 | GCCGGGATCTACCATACCC | CCTGCATAAGCACATCCTGAAG |
| C-MYC | TGCCAAGAGGGTCAAGTTGG | CAAGACGTTGTGTGTTCGCC |
| E2F3 | GCACTACGAAGTCCAGATAGTC | GAGGTGGATGCCTTCCAGAAC |
| ECSIT | GTAGGAAGTGGAAGAGACGCC | ATGCACATGGCGAAGACAGG |
| ECSIT | GTAGGAAGTGGAAGAGACGCC | ATGCACATGGCGAAGACAGG |
| ELK1 | CACCGCCACGCTACACAC | GATGATGTGGCCATTGCCTTG |
| GAPDH | CTCCAAAATCAAGTGGGGCG | ATGACGAACATGGGGGCATC |
| HMGB2 | GTGAACACCCTGGCCTATCC | GCTTCACTTTTGCCCTTGGC |
| HNRNPAB | TGGACGGTCAAGAGGGTTTG | CCGGGTCCTTCTTCATAGCC |
| HPRT1 | TGACACTGGCAAAACAATGCA | GGTCCTTTTCACCAGCAAGCT |
| MYB | CCAAGTCTGGAAAGCGTCAC | GGTCCAAGGACCCTTGATGAG |
| MYBL2 | AGATTCAGATGTGCCGGAGC | TCCAGTCCTGCTGTCCAAAC |
| MYCN | GCACAGACTGTAGCCATCCG | TTTAATACCGGGGGTGCTTCC |
| NME2 | GCAGATTCAAAGCCAGGCAC | AGACTGCTGTTGTGTCCACC |
| PLK1 | TATATCCCTGCCCGTCTCCC | CCTCACCTGTCTCTCGAACC |
| PRDM8 | TCAGGAAGAGCCTAAAAGGCG | AATAAGGCCACCTGGAACCG |
| PTTG1 | CCTGAAGAGCACCAGATTGC | GGTGGCAATTCAACATCCAGG |
| RCOR2 | TCTGGGATCCTGTCCCGTAG | GGTAATTGGTTCCAACGCGG |
| TAF1D | TACAGAGCTCTAGGACACCAGG | AGAGGATGAGGATGCAACAC |
| TAF1D | AGAGGATGAGGATGCAACAC | GCATCAGATGTCACATGGTCAAG |
| TCF3 | GAACTTGCCTCTCCCTCTTG | GGGTGAATCTCGTTTGAATTCTATG |
| TEAD4 | CACCTGTTCGTGCACATTGG | GTCCCCGTTCGAAGAGATCC |
| TFAP4 | AGGTCTCCGTTGCTTCTTG | GGAGAGTGGCGAATTCTAGTG |
| TP53 | GGCATTTGCACCTACCTCAC | AAACTACCAACCCACCGACC |
| TRIM28 | AGCCACATGGCGAGATGAAG | AGGGCCTGTTGAGTTAGTGC |
| UHRF1 | CACAACGTGTGCAAGGACTG | TTTCAGCAAAACGCCTGTCG |
| ZNF219 | TCTGCAGCGATACTCCAACG | CACGACTCTCAGACCAGCTC |
| ZNF239 | ATGGACAAGAACTGGCCTCG | GGTCACAGGGTTTCTCCTCTG |
| ZNF581 | GCTTCTGCGCTGTTGTTG | CAGAGTGGGAAACGTGTTTATTG |
| ZNF695 | TCTCCCTTGGTGAGGATAGC | TCTCTGTGTTCACGTTCCAGG |
| ZNF8 | GAGCAAGGGACCGAGCTATG | CTTCCTTGCGTGATGCTTGG |
| TAZ | AGCTCAGATCCTTTCCTCAATG | TCCTGCGTTTTCTCCTGTATC |
|  |  |  |
| **ChIP on Target** | **Sequence (5'-3') - sense** | **Sequence (5'-3') - antisense** |
| MYCNonTEAD4 | GGGACGAGACTGGGAAGAG | TGCCTCTCCGGTCCTTTC |
| MYCNonMYBL2 | GGTCTTCGCTATGTGGGATAC | GCTACTTCGGAGTTGTGGAG |
| MYCNonTFAP4 | GAAGTTACAGAAGCCCAGGAAG | CAAGGAGAGAAGGACAACCAAG |
| MYCNonTAF1D | CCTACTTGGGTGTCGATGC | CGTTAGCTCCGGGTAAAGC |
